# Supplementary material for: Large-Scale Investigation of Human TF-miRNA Relations Based on Coexpression Profiles
Source: Hindawi journal article supplement (doi:10.1155/2014/623078), 2014-01-01
Supplement: f1 [file 623078.f1.pdf]

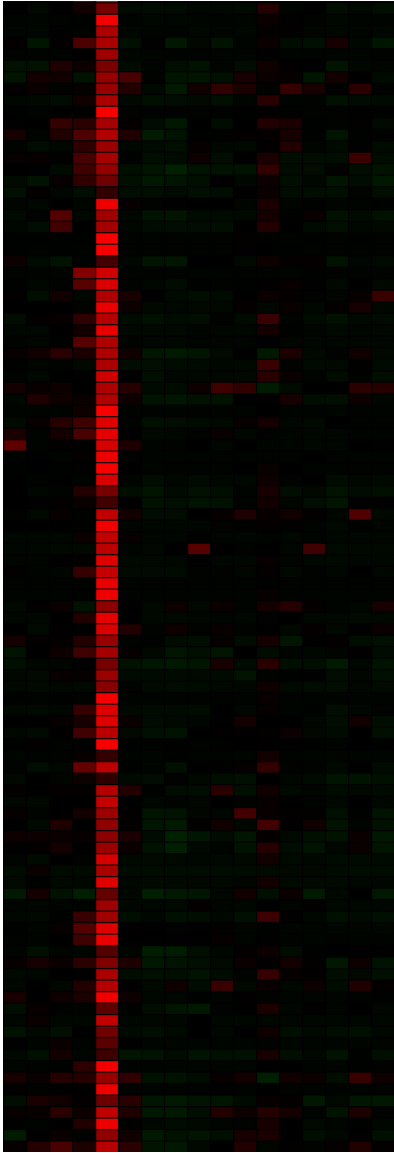

LBP  
LCAT  
LECT2  
LIME1  
LIPC  
LPA  
MAD1L1  
MANF  
MASP2  
MAT1A  
MGMT  
MPST  
MST1  
MTIF  
MTHFD1  
MTHFS  
MYH7B  
NNMT  
NPC1L1  
NRTN  
ORM1  
ORM2  
OSGIN1  
PCK1  
PCK2  
PCOLCE  
PEMT  
PIPOX  
PKLR  
PLG  
POLD2  
PON1  
PON3  
PIB  
POLC1  
PROC  
PXMP2  
QPR1  
RARRES2  
RBP4  
RDH16  
SAA4  
SARDH  
SCRT1  
SDF2L1  
SDS  
SERPINA1  
SERPINA3  
SERPINA4  
SERPINA6  
SERPINC1  
SERPIND1  
SERPINF1  
SERPINF2  
SERPING1  
SHMT2  
SIGIRR  
SIGMAR1  
SLC10A1  
SLC17A2  
SLC22A1  
SLC22A7  
SLC25A1  
SLC25A10  
SLC27A5  
SLC2A2  
SLC37A4  
SLC5A7  
SLC02B1  
SPP2  
STAP2  
STEAP3  
SULT1A1  
SULT1A2  
TAT  
TF  
TFR2  
THOP1  
TM4SF4  
TM4SF6  
TMEM176A  
TMEM176B  
TMEM223  
TMEM53  
TMPRSS6  
TSKU  
TST  
TTPAL  
TTR  
UGT2B15  
UGT2B4  
UNC93A  
UPB1  
VKORC1  
VTN  
WDR18  
YIF1A  
ZGPAT  
ZMAT5  
ZNHIT1

**Figure S2.** The comparison of hsa-miR-122 expression patterns with and without  $\log_{10}$  transformation.

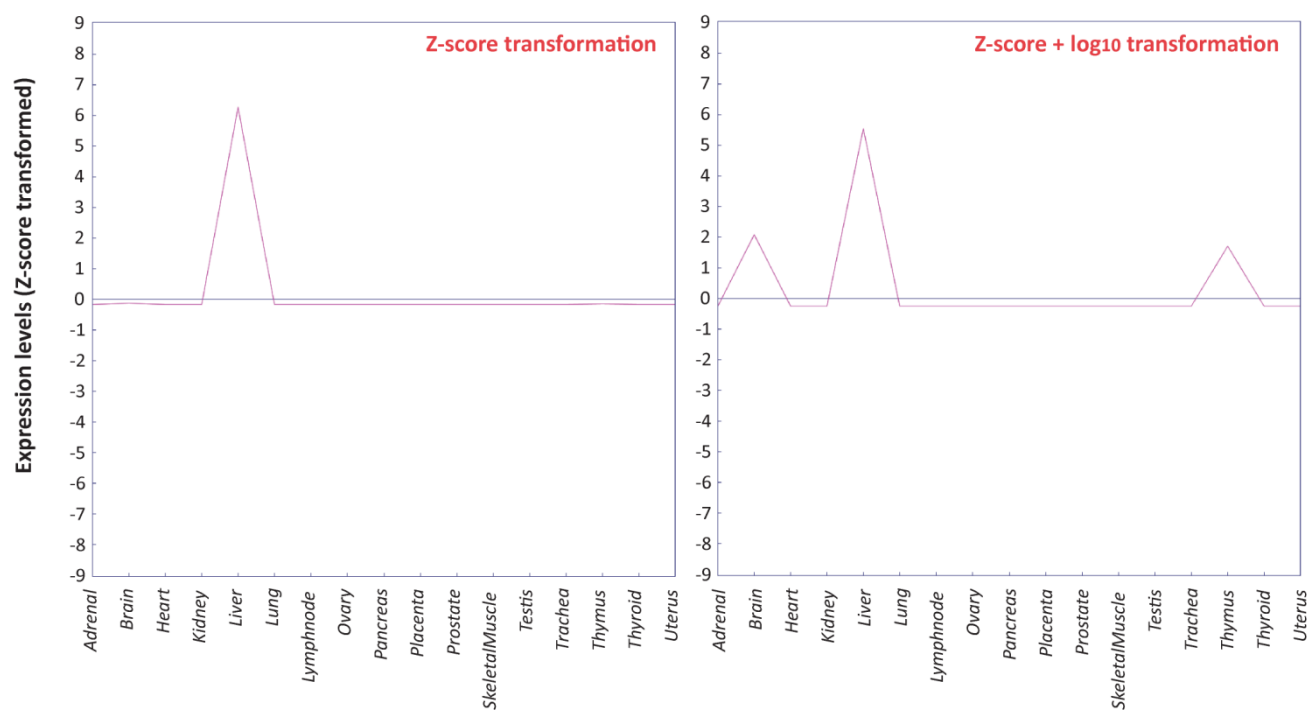

**Table S1.** Putative TSSs of intergenic miRNAs in human genome. (miRBase release 19)

| miRNA          | Genomic coordinates  | Putative TSS | Distance from precursor | # of CAGE tags | # of TSS tags | H3K4me3 | # of ESTs | Conservation score |
|----------------|----------------------|--------------|-------------------------|----------------|---------------|---------|-----------|--------------------|
| hsa-let-7a-1   | chr9: 96938239 [+]   | 96928529     | 9710                    | 124            | 0             | 16      | 1         | 0.36996            |
| hsa-let-7d     | chr9: 96941116 [+]   | 96929155     | 11961                   | 0              | 13            | 30      | 0         | 0.64614            |
| hsa-let-7e     | chr19: 52196039 [+]  | 52192635     | 3404                    | 0              | 1884          | 9       | 0         | 0.87933            |
| hsa-let-7f-1   | chr9: 96938629 [+]   | 96928529     | 10100                   | 124            | 0             | 16      | 1         | 0.41264            |
| hsa-mir-19b-2  | chrX: 133303796 [-]  | 133307920    | 4124                    | 0              | 12            | 24      | 0         | 0.41535            |
| hsa-mir-21     | chr17: 57918627 [+]  | 57915292     | 3335                    | 33             | 135761        | 8       | 182       | 0.40689            |
| hsa-mir-30a    | chr6: 72113324 [-]   | 72129855     | 16531                   | 21             | 0             | 7       | 9         | 0.35098            |
| hsa-mir-96     | chr7: 129414609 [-]  | 129420061    | 5452                    | 27             | 0             | 17      | 1         | 0.57303            |
| hsa-mir-101-1  | chr1: 65524191 [-]   | 65533415     | 9224                    | 0              | 4659          | 45      | 5         | 0.93795            |
| hsa-mir-29b-2  | chr1: 207975868 [-]  | 207997257    | 21389                   | 0              | 105           | 39      | 0         | 0.97563            |
| hsa-mir-106a   | chrX: 133304308 [-]  | 133307920    | 3612                    | 0              | 12            | 24      | 0         | 0.39961            |
| hsa-mir-196a-1 | chr17: 46709921 [-]  | 46711028     | 1107                    | 13             | 0             | 9       | 4         | 0.64567            |
| hsa-mir-197    | chr1: 110141515 [+]  | 110135089    | 6426                    | 0              | 185           | 6       | 24        | 0.80787            |
| hsa-mir-199a-1 | chr19: 10928172 [-]  | 10946886     | 18714                   | 0              | 2909          | 34      | 83        | 0.57614            |
| hsa-mir-129-1  | chr7: 127847925 [+]  | 127807707    | 40218                   | 7              | 0             | 22      | 0         | 0.7763             |
| hsa-mir-148a   | chr7: 25989606 [-]   | 25990794     | 1188                    | 0              | 99            | 28      | 0         | 0.92795            |
| hsa-mir-30c-2  | chr6: 72086734 [-]   | 72129855     | 43121                   | 21             | 0             | 7       | 9         | 0.39378            |
| hsa-mir-30d    | chr8: 135817188 [-]  | 135844520    | 27332                   | 0              | 193           | 35      | 0         | 0.75496            |
| hsa-mir-147a   | chr9: 123007328 [-]  | 123019092    | 11764                   | 20             | 0             | 1       | 0         | 0.00986            |
| hsa-mir-10b    | chr2: 177015031 [+]  | 176987472    | 27559                   | 0              | 124           | 33      | 11        | 0.99705            |
| hsa-mir-34a    | chr1: 9211836 [-]    | 9242248      | 30412                   | 8              | 0             | 17      | 2         | 0.03933            |
| hsa-mir-181c   | chr19: 13985513 [+]  | 13976314     | 9199                    | 90             | 0             | 12      | 1         | 0.74532            |
| hsa-mir-182    | chr7: 129410332 [-]  | 129420061    | 9729                    | 27             | 0             | 17      | 1         | 0.64409            |
| hsa-mir-183    | chr7: 129414854 [-]  | 129420061    | 5207                    | 27             | 0             | 17      | 1         | 0.65996            |
| hsa-mir-196a-2 | chr12: 54385522 [+]  | 54379040     | 6482                    | 0              | 90            | 9       | 29        | 0.99277            |
| hsa-mir-199b   | chr9: 131007109 [-]  | 131038220    | 31111                   | 0              | 2422          | 34      | 45        | 0.3135             |
| hsa-mir-203a   | chr14: 104583742 [+] | 104583548    | 194                     | 43             | 0             | 7       | 0         | 0.06831            |
| hsa-mir-212    | chr17: 1953674 [-]   | 1960152      | 6478                    | 73             | 0             | 40      | 4         | 0.95646            |
| hsa-mir-215    | chr1: 220291304 [-]  | 220317326    | 26022                   | 21             | 0             | 0       | 22        | 0.94614            |

|                |                      |           |       |      |       |    |     |          |
|----------------|----------------------|-----------|-------|------|-------|----|-----|----------|
| hsa-mir-219-1  | chr6: 33175612 [+]   | 33168676  | 6936  | 4    | 7928  | 19 | 323 | 0.59681  |
| hsa-mir-221    | chrX: 45605694 [-]   | 45629251  | 23557 | 15   | 0     | 25 | 0   | 0.94453  |
| hsa-mir-222    | chrX: 45606530 [-]   | 45629750  | 23220 | 2    | 0     | 26 | 0   | 0.91579  |
| hsa-mir-223    | chrX: 65238712 [+]   | 65235303  | 3409  | 11   | 121   | 12 | 4   | 0.51894  |
| hsa-mir-200b   | chr1: 1102484 [+]    | 1098321   | 4163  | 15   | 0     | 2  | 1   | 0.3148   |
| hsa-let-7i     | chr12: 62997466 [+]  | 62986639  | 10827 | 0    | 292   | 5  | 36  | 0.71429  |
| hsa-mir-1-2    | chr18: 19409049 [-]  | 19411367  | 2318  | 0    | 1207  | 4  | 9   | 0.97823  |
| hsa-mir-30b    | chr8: 135812850 [-]  | 135844582 | 31732 | 0    | 80    | 36 | 0   | 0.77768  |
| hsa-mir-122    | chr18: 56118306 [+]  | 56113495  | 4811  | 0    | 21    | 3  | 2   | 0.39445  |
| hsa-mir-124-1  | chr8: 9760982 [-]    | 9776694   | 15712 | 0    | 38    | 2  | 7   | 0.91244  |
| hsa-mir-124-3  | chr20: 61809852 [+]  | 61808949  | 903   | 7    | 0     | 17 | 0   | 0.96398  |
| hsa-mir-132    | chr17: 1953302 [-]   | 1960152   | 6850  | 73   | 0     | 40 | 4   | 0.94496  |
| hsa-mir-133a-1 | chr18: 19405746 [-]  | 19411367  | 5621  | 0    | 1207  | 4  | 9   | 0.97823  |
| hsa-mir-135a-1 | chr3: 52328324 [-]   | 52341559  | 13235 | 38   | 0     | 4  | 0   | 0.6972   |
| hsa-mir-138-2  | chr16: 56892430 [+]  | 56882708  | 9722  | 120  | 0     | 4  | 2   | 0.02641  |
| hsa-mir-141    | chr12: 7073260 [+]   | 7023747   | 49513 | 0    | 887   | 35 | 871 | 0.52831  |
| hsa-mir-142    | chr17: 56408679 [-]  | 56429562  | 20883 | 1    | 53849 | 32 | 269 | 0.44976  |
| hsa-mir-144    | chr17: 27188636 [-]  | 27224681  | 36045 | 2061 | 0     | 32 | 136 | 0.66807  |
| hsa-mir-9-3    | chr15: 89911248 [+]  | 89905739  | 5509  | 56   | 0     | 13 | 5   | 0.37512  |
| hsa-mir-125a   | chr19: 52196507 [+]  | 52192545  | 3962  | 4    | 0     | 9  | 0   | 0.94409  |
| hsa-mir-127    | chr14: 101349316 [+] | 101315647 | 33669 | 1    | 0     | 3  | 11  | 0.13544  |
| hsa-mir-129-2  | chr11: 43602944 [+]  | 43600962  | 1982  | 15   | 0     | 28 | 0   | 0.87346  |
| hsa-mir-134    | chr14: 101521024 [+] | 101491439 | 29585 | 66   | 0     | 3  | 0   | 0.58449  |
| hsa-mir-136    | chr14: 101351039 [+] | 101315812 | 35227 | 1    | 0     | 20 | 9   | 0.3389   |
| hsa-mir-146a   | chr5: 159912359 [+]  | 159895244 | 17115 | 0    | 686   | 52 | 1   | 0.74933  |
| hsa-mir-150    | chr19: 50004125 [-]  | 50004150  | 25    | 221  | 0     | 76 | 0   | 0.39949  |
| hsa-mir-154    | chr14: 101526092 [+] | 101491439 | 34653 | 66   | 0     | 3  | 0   | 0.56465  |
| hsa-mir-184    | chr15: 79502130 [+]  | 79463212  | 38918 | 69   | 0     | 0  | 0   | 8.70E-04 |
| hsa-mir-193a   | chr17: 29887015 [+]  | 29886135  | 880   | 240  | 0     | 12 | 0   | 0.60551  |
| hsa-mir-194-1  | chr1: 220291583 [-]  | 220317326 | 25743 | 21   | 0     | 0  | 22  | 0.85985  |
| hsa-mir-206    | chr6: 52009147 [+]   | 51993643  | 15504 | 121  | 0     | 2  | 0   | 0.00955  |

|                |                      |           |       |      |       |    |     |         |
|----------------|----------------------|-----------|-------|------|-------|----|-----|---------|
| hsa-mir-320a   | chr8: 22102556 [-]   | 22103064  | 508   | 5    | 0     | 41 | 0   | 0.71724 |
| hsa-mir-200c   | chr12: 7072862 [+]   | 7023747   | 49115 | 0    | 887   | 35 | 875 | 0.53713 |
| hsa-mir-29c    | chr1: 207975284 [-]  | 207997257 | 21973 | 0    | 105   | 39 | 0   | 0.97469 |
| hsa-mir-200a   | chr1: 1103243 [+]    | 1098321   | 4922  | 15   | 0     | 2  | 1   | 0.45598 |
| hsa-mir-219-2  | chr9: 131154993 [-]  | 131155780 | 787   | 11   | 60    | 14 | 0   | 0.99984 |
| hsa-mir-299    | chr14: 101490131 [+] | 101463609 | 26522 | 0    | 69    | 0  | 0   | 0.00199 |
| hsa-mir-99b    | chr19: 52195865 [+]  | 52192545  | 3320  | 4    | 0     | 9  | 0   | 0.86591 |
| hsa-mir-296    | chr20: 57392749 [-]  | 57425957  | 33208 | 7    | 155   | 38 | 2   | 0.68457 |
| hsa-mir-130b   | chr22: 22007593 [+]  | 21996608  | 10985 | 819  | 6     | 32 | 105 | 0.48484 |
| hsa-mir-363    | chrX: 133303482 [-]  | 133307920 | 4438  | 0    | 12    | 24 | 0   | 0.42413 |
| hsa-mir-365a   | chr16: 14403142 [+]  | 14396158  | 6984  | 0    | 95    | 7  | 4   | 0.34417 |
| hsa-mir-365b   | chr17: 29902430 [+]  | 29860524  | 41906 | 0    | 208   | 9  | 4   | 0.02929 |
| hsa-mir-376c   | chr14: 101506027 [+] | 101491439 | 14588 | 66   | 0     | 3  | 0   | 0.58445 |
| hsa-mir-369    | chr14: 101531935 [+] | 101491439 | 40496 | 66   | 0     | 3  | 0   | 0.58071 |
| hsa-mir-370    | chr14: 101377476 [+] | 101328211 | 49265 | 46   | 0     | 2  | 1   | 0.00407 |
| hsa-mir-371a   | chr19: 54290929 [+]  | 54278723  | 12206 | 0    | 123   | 1  | 2   | 0.20502 |
| hsa-mir-372    | chr19: 54291144 [+]  | 54278723  | 12421 | 0    | 123   | 1  | 4   | 0.20498 |
| hsa-mir-373    | chr19: 54291959 [+]  | 54278723  | 13236 | 0    | 123   | 1  | 4   | 0.20615 |
| hsa-mir-375    | chr2: 219866430 [-]  | 219906238 | 39808 | 0    | 75    | 26 | 15  | 0.46949 |
| hsa-mir-376a-1 | chr14: 101507119 [+] | 101491439 | 15680 | 66   | 0     | 3  | 0   | 0.57929 |
| hsa-mir-377    | chr14: 101528387 [+] | 101491439 | 36948 | 66   | 0     | 3  | 0   | 0.57276 |
| hsa-mir-379    | chr14: 101488403 [+] | 101439124 | 49279 | 0    | 14    | 0  | 0   | 0.00598 |
| hsa-mir-380    | chr14: 101491354 [+] | 101463609 | 27745 | 0    | 69    | 0  | 0   | 0.002   |
| hsa-mir-381    | chr14: 101512257 [+] | 101491439 | 20818 | 66   | 0     | 3  | 0   | 0.5826  |
| hsa-mir-382    | chr14: 101520643 [+] | 101491439 | 29204 | 66   | 0     | 3  | 0   | 0.57146 |
| hsa-mir-328    | chr16: 67236298 [-]  | 67281385  | 45087 | 1052 | 0     | 57 | 46  | 0.39516 |
| hsa-mir-337    | chr14: 101340830 [+] | 101292454 | 48376 | 2083 | 0     | 6  | 358 | 0.87394 |
| hsa-mir-323a   | chr14: 101492069 [+] | 101491439 | 630   | 66   | 0     | 3  | 0   | 0.59402 |
| hsa-mir-135b   | chr1: 205417526 [-]  | 205425195 | 7669  | 0    | 991   | 8  | 2   | 0.92118 |
| hsa-mir-331    | chr12: 95702196 [+]  | 95693246  | 8950  | 1    | 0     | 3  | 5   | 0.76736 |
| hsa-mir-324    | chr17: 7126698 [-]   | 7145679   | 18981 | 3    | 36026 | 32 | 467 | 0.88535 |

|                |                      |           |       |      |     |    |     |         |
|----------------|----------------------|-----------|-------|------|-----|----|-----|---------|
| hsa-mir-133b   | chr6: 52013721 [+]   | 51993643  | 20078 | 121  | 0   | 2  | 0   | 0.01512 |
| hsa-mir-345    | chr14: 100774196 [+] | 100744115 | 30081 | 0    | 94  | 2  | 37  | 0.95843 |
| hsa-mir-422a   | chr15: 64163218 [-]  | 64188708  | 25490 | 8    | 0   | 2  | 0   | 0.00791 |
| hsa-mir-424    | chrX: 133680741 [-]  | 133680810 | 69    | 0    | 688 | 3  | 0   | 0.09323 |
| hsa-mir-18b    | chrX: 133304141 [-]  | 133307920 | 3779  | 0    | 12  | 24 | 0   | 0.42984 |
| hsa-mir-20b    | chrX: 133303907 [-]  | 133307920 | 4013  | 0    | 12  | 24 | 0   | 0.39945 |
| hsa-mir-429    | chr1: 1104385 [+]    | 1098321   | 6064  | 15   | 0   | 2  | 1   | 0.31024 |
| hsa-mir-450a-1 | chrX: 133674461 [-]  | 133680578 | 6117  | 4    | 0   | 4  | 12  | 0.47634 |
| hsa-mir-431    | chr14: 101347344 [+] | 101316423 | 30921 | 1    | 0   | 1  | 10  | 0.00728 |
| hsa-mir-433    | chr14: 101348223 [+] | 101315647 | 32576 | 1    | 0   | 3  | 11  | 0.17032 |
| hsa-mir-329-1  | chr14: 101493122 [+] | 101491439 | 1683  | 66   | 0   | 3  | 0   | 0.58378 |
| hsa-mir-329-2  | chr14: 101493437 [+] | 101491439 | 1998  | 66   | 0   | 3  | 0   | 0.57709 |
| hsa-mir-451a   | chr17: 27188458 [-]  | 27224681  | 36223 | 2061 | 0   | 32 | 143 | 0.68012 |
| hsa-mir-409    | chr14: 101531637 [+] | 101491439 | 40198 | 66   | 0   | 3  | 0   | 0.57709 |
| hsa-mir-412    | chr14: 101531784 [+] | 101491439 | 40345 | 66   | 0   | 3  | 0   | 0.58315 |
| hsa-mir-410    | chr14: 101532249 [+] | 101491439 | 40810 | 66   | 0   | 3  | 0   | 0.57142 |
| hsa-mir-376b   | chr14: 101506773 [+] | 101491439 | 15334 | 66   | 0   | 3  | 0   | 0.60449 |
| hsa-mir-485    | chr14: 101521756 [+] | 101491439 | 30317 | 66   | 0   | 3  | 0   | 0.57886 |
| hsa-mir-487a   | chr14: 101518783 [+] | 101491439 | 27344 | 66   | 0   | 3  | 0   | 0.58807 |
| hsa-mir-146b   | chr10: 104196269 [+] | 104155462 | 40807 | 2    | 180 | 10 | 55  | 0.89929 |
| hsa-mir-202    | chr10: 135061124 [-] | 135090371 | 29247 | 8    | 5   | 40 | 80  | 0.04334 |
| hsa-mir-493    | chr14: 101335397 [+] | 101292454 | 42943 | 2083 | 0   | 6  | 357 | 0.94638 |
| hsa-mir-432    | chr14: 101350820 [+] | 101315647 | 35173 | 1    | 0   | 3  | 11  | 0.15536 |
| hsa-mir-494    | chr14: 101495971 [+] | 101491439 | 4532  | 66   | 0   | 3  | 0   | 0.59909 |
| hsa-mir-495    | chr14: 101500092 [+] | 101491439 | 8653  | 66   | 0   | 3  | 0   | 0.56465 |
| hsa-mir-496    | chr14: 101526910 [+] | 101491439 | 35471 | 66   | 0   | 3  | 0   | 0.56465 |
| hsa-mir-193b   | chr16: 14397824 [+]  | 14396158  | 1666  | 0    | 95  | 7  | 4   | 0.32866 |
| hsa-mir-181d   | chr19: 13985689 [+]  | 13976314  | 9375  | 90   | 0   | 12 | 1   | 0.74661 |
| hsa-mir-512-1  | chr19: 54169933 [+]  | 54120041  | 49892 | 79   | 0   | 0  | 0   | 0.18172 |
| hsa-mir-512-2  | chr19: 54172411 [+]  | 54172186  | 225   | 24   | 0   | 3  | 0   | 0.00807 |
| hsa-mir-498    | chr19: 54177451 [+]  | 54172186  | 5265  | 24   | 0   | 3  | 0   | 0.01278 |

|                |                     |           |       |     |       |    |    |         |
|----------------|---------------------|-----------|-------|-----|-------|----|----|---------|
| hsa-mir-520e   | chr19: 54178965 [+] | 54172186  | 6779  | 24  | 0     | 3  | 0  | 0.01316 |
| hsa-mir-515-1  | chr19: 54182257 [+] | 54172186  | 10071 | 24  | 0     | 3  | 0  | 0.01294 |
| hsa-mir-519e   | chr19: 54183194 [+] | 54172186  | 11008 | 24  | 0     | 3  | 0  | 0.00885 |
| hsa-mir-520f   | chr19: 54185413 [+] | 54172186  | 13227 | 24  | 0     | 3  | 0  | 0.00779 |
| hsa-mir-515-2  | chr19: 54188263 [+] | 54172186  | 16077 | 24  | 0     | 3  | 0  | 0.01319 |
| hsa-mir-519c   | chr19: 54189723 [+] | 54172186  | 17537 | 24  | 0     | 3  | 0  | 0.01812 |
| hsa-mir-520a   | chr19: 54194135 [+] | 54172186  | 21949 | 24  | 0     | 3  | 0  | 0.01452 |
| hsa-mir-526b   | chr19: 54197647 [+] | 54172186  | 25461 | 24  | 0     | 3  | 0  | 0.01285 |
| hsa-mir-519b   | chr19: 54198467 [+] | 54172186  | 26281 | 24  | 0     | 3  | 0  | 0.01303 |
| hsa-mir-525    | chr19: 54200787 [+] | 54172186  | 28601 | 24  | 0     | 3  | 0  | 0.01012 |
| hsa-mir-523    | chr19: 54201639 [+] | 54172186  | 29453 | 24  | 0     | 3  | 0  | 0.0137  |
| hsa-mir-518f   | chr19: 54203269 [+] | 54172186  | 31083 | 24  | 0     | 3  | 0  | 0.01287 |
| hsa-mir-520b   | chr19: 54204481 [+] | 54172186  | 32295 | 24  | 0     | 3  | 0  | 0.01148 |
| hsa-mir-518b   | chr19: 54205991 [+] | 54172186  | 33805 | 24  | 0     | 3  | 0  | 0.00929 |
| hsa-mir-526a-1 | chr19: 54209506 [+] | 54172186  | 37320 | 24  | 0     | 3  | 0  | 0.00843 |
| hsa-mir-520c   | chr19: 54210707 [+] | 54172186  | 38521 | 24  | 0     | 3  | 0  | 0.00838 |
| hsa-mir-518c   | chr19: 54211989 [+] | 54172186  | 39803 | 24  | 0     | 3  | 0  | 0.00968 |
| hsa-mir-524    | chr19: 54214256 [+] | 54172186  | 42070 | 24  | 0     | 3  | 0  | 0.0129  |
| hsa-mir-517a   | chr19: 54215522 [+] | 54172186  | 43336 | 24  | 0     | 3  | 0  | 0.01854 |
| hsa-mir-519d   | chr19: 54216601 [+] | 54172186  | 44415 | 24  | 0     | 3  | 0  | 0.00855 |
| hsa-mir-521-2  | chr19: 54219848 [+] | 54172186  | 47662 | 24  | 0     | 3  | 0  | 0.01282 |
| hsa-mir-450a-2 | chrX: 133674637 [-] | 133680578 | 5941  | 4   | 0     | 4  | 12 | 0.37752 |
| hsa-mir-505    | chrX: 139006390 [-] | 139015194 | 8804  | 0   | 14656 | 40 | 7  | 0.43185 |
| hsa-mir-513a-1 | chrX: 146295109 [-] | 146314685 | 19576 | 89  | 0     | 1  | 0  | 0.05121 |
| hsa-mir-513a-2 | chrX: 146307470 [-] | 146314685 | 7215  | 89  | 0     | 1  | 0  | 0.05791 |
| hsa-mir-506    | chrX: 146312361 [-] | 146314685 | 2324  | 89  | 0     | 1  | 0  | 0.0572  |
| hsa-mir-507    | chrX: 146312595 [-] | 146314685 | 2090  | 89  | 0     | 1  | 0  | 0.04473 |
| hsa-mir-508    | chrX: 146318545 [-] | 146351035 | 32490 | 20  | 0     | 2  | 0  | 0.2214  |
| hsa-mir-509-1  | chrX: 146342143 [-] | 146390339 | 48196 | 100 | 0     | 2  | 0  | 0.20831 |
| hsa-mir-510    | chrX: 146353926 [-] | 146390339 | 36413 | 100 | 0     | 2  | 0  | 0.20376 |
| hsa-mir-514a-1 | chrX: 146360862 [-] | 146390339 | 29477 | 100 | 0     | 2  | 0  | 0.19487 |



|                |                      |           |       |      |      |    |     |         |
|----------------|----------------------|-----------|-------|------|------|----|-----|---------|
| hsa-mir-514a-2 | chrX: 146363548 [-]  | 146390339 | 26791 | 100  | 0    | 2  | 0   | 0.20551 |
| hsa-mir-514a-3 | chrX: 146366246 [-]  | 146390339 | 24093 | 100  | 0    | 2  | 0   | 0.20657 |
| hsa-mir-539    | chr14: 101513658 [+] | 101491439 | 22219 | 66   | 0    | 3  | 0   | 0.58299 |
| hsa-mir-544a   | chr14: 101514995 [+] | 101491439 | 23556 | 66   | 0    | 3  | 0   | 0.56465 |
| hsa-mir-376a-2 | chr14: 101506406 [+] | 101491439 | 14967 | 66   | 0    | 3  | 0   | 0.56465 |
| hsa-mir-487b   | chr14: 101512792 [+] | 101491439 | 21353 | 66   | 0    | 3  | 0   | 0.56465 |
| hsa-mir-552    | chr1: 35135295 [-]   | 35150930  | 15635 | 8    | 0    | 4  | 0   | 0.00126 |
| hsa-mir-92b    | chr1: 155164968 [+]  | 155146376 | 18592 | 0    | 493  | 21 | 151 | 0.90268 |
| hsa-mir-557    | chr1: 168344762 [+]  | 168338249 | 6513  | 32   | 0    | 2  | 0   | 0.18015 |
| hsa-mir-563    | chr3: 15915278 [+]   | 15901669  | 13609 | 0    | 211  | 33 | 6   | 0.1111  |
| hsa-mir-564    | chr3: 44903380 [+]   | 44901601  | 1779  | 246  | 0    | 4  | 0   | 0.10757 |
| hsa-mir-568    | chr3: 114035416 [-]  | 114052542 | 17126 | 0    | 96   | 5  | 8   | 0.72563 |
| hsa-mir-570    | chr3: 195426272 [+]  | 195384935 | 41337 | 4400 | 0    | 4  | 86  | 0.06903 |
| hsa-mir-572    | chr4: 11370451 [+]   | 11370266  | 185   | 3    | 0    | 1  | 0   | 0.26876 |
| hsa-mir-573    | chr4: 24521913 [-]   | 24531367  | 9454  | 0    | 26   | 15 | 36  | 0.90283 |
| hsa-mir-583    | chr5: 95414842 [+]   | 95374210  | 40632 | 319  | 0    | 0  | 0   | 0.25126 |
| hsa-mir-587    | chr6: 107232000 [+]  | 107194425 | 37575 | 0    | 320  | 3  | 0   | 0.46213 |
| hsa-mir-548a-2 | chr6: 135560298 [+]  | 135516916 | 43382 | 27   | 0    | 2  | 3   | 0.94161 |
| hsa-mir-596    | chr8: 1765397 [+]    | 1745447   | 19950 | 2    | 0    | 3  | 0   | 0.15124 |
| hsa-mir-548a-3 | chr8: 105496693 [-]  | 105501878 | 5185  | 0    | 50   | 0  | 8   | 0.85945 |
| hsa-mir-602    | chr9: 140732871 [+]  | 140730243 | 2628  | 0    | 82   | 4  | 6   | 0.7598  |
| hsa-mir-606    | chr10: 77312216 [+]  | 77307735  | 4481  | 13   | 0    | 3  | 0   | 0.93811 |
| hsa-mir-607    | chr10: 98588521 [-]  | 98592185  | 3664  | 246  | 0    | 23 | 2   | 0.58161 |
| hsa-mir-610    | chr11: 28078362 [+]  | 28041088  | 37274 | 0    | 187  | 2  | 0   | 0.06189 |
| hsa-mir-614    | chr12: 13068763 [+]  | 13044499  | 24264 | 0    | 6977 | 38 | 256 | 0.29492 |
| hsa-mir-622    | chr13: 90883436 [+]  | 90874748  | 8688  | 35   | 0    | 1  | 0   | 0.05756 |
| hsa-mir-630    | chr15: 72879558 [+]  | 72873125  | 6433  | 0    | 25   | 18 | 16  | 0.98602 |
| hsa-mir-631    | chr15: 75646026 [-]  | 75660946  | 14920 | 17   | 1230 | 41 | 285 | 0.53657 |
| hsa-mir-632    | chr17: 30677128 [+]  | 30676882  | 246   | 1    | 0    | 42 | 4   | 0.0019  |
| hsa-mir-633    | chr17: 61021576 [+]  | 60998963  | 22613 | 31   | 0    | 2  | 0   | 0.24551 |
| hsa-mir-639    | chr19: 14640355 [+]  | 14627409  | 12946 | 0    | 5    | 40 | 17  | 0.93898 |

|                |                      |           |       |     |      |    |    |          |
|----------------|----------------------|-----------|-------|-----|------|----|----|----------|
| hsa-mir-645    | chr20: 49202323 [+]  | 49201170  | 1153  | 0   | 191  | 6  | 4  | 0.5737   |
| hsa-mir-649    | chr22: 21388561 [-]  | 21398551  | 9990  | 0   | 411  | 4  | 1  | 0.56878  |
| hsa-mir-662    | chr16: 820183 [+]    | 771146    | 49037 | 0   | 124  | 27 | 33 | 0.07854  |
| hsa-mir-548d-2 | chr17: 65467701 [-]  | 65474627  | 6926  | 0   | 39   | 14 | 0  | 0.15827  |
| hsa-mir-411    | chr14: 101489662 [+] | 101457982 | 31680 | 0   | 31   | 0  | 0  | 1.20E-04 |
| hsa-mir-654    | chr14: 101506556 [+] | 101491439 | 15117 | 66  | 0    | 3  | 0  | 0.57886  |
| hsa-mir-655    | chr14: 101515887 [+] | 101491439 | 24448 | 66  | 0    | 3  | 0  | 0.57276  |
| hsa-mir-656    | chr14: 101533061 [+] | 101491439 | 41622 | 66  | 0    | 3  | 0  | 0.58508  |
| hsa-mir-549a   | chr15: 81134414 [-]  | 81160813  | 26399 | 23  | 0    | 3  | 0  | 0.00141  |
| hsa-mir-658    | chr22: 38240378 [-]  | 38273766  | 33388 | 0   | 225  | 6  | 80 | 0.9585   |
| hsa-mir-659    | chr22: 38243781 [-]  | 38273766  | 29985 | 0   | 225  | 6  | 80 | 0.95866  |
| hsa-mir-542    | chrX: 133675467 [-]  | 133680578 | 5111  | 4   | 0    | 4  | 12 | 0.47634  |
| hsa-mir-758    | chr14: 101492357 [+] | 101491439 | 918   | 66  | 0    | 3  | 0  | 0.5826   |
| hsa-mir-668    | chr14: 101521595 [+] | 101491439 | 30156 | 66  | 0    | 3  | 0  | 0.56465  |
| hsa-mir-320b-1 | chr1: 117214371 [+]  | 117208978 | 5393  | 38  | 0    | 0  | 0  | 0.28244  |
| hsa-mir-320c-1 | chr18: 19263471 [+]  | 19250302  | 13169 | 0   | 76   | 2  | 1  | 0.0685   |
| hsa-mir-1323   | chr19: 54175222 [+]  | 54172186  | 3036  | 24  | 0    | 3  | 0  | 0.01854  |
| hsa-mir-1185-2 | chr14: 101510535 [+] | 101491439 | 19096 | 66  | 0    | 3  | 0  | 0.58071  |
| hsa-mir-1283-1 | chr19: 54191735 [+]  | 54172186  | 19549 | 24  | 0    | 3  | 0  | 0.01452  |
| hsa-mir-769    | chr19: 46522190 [+]  | 46498725  | 23465 | 13  | 6028 | 30 | 17 | 0.44715  |
| hsa-mir-1185-1 | chr14: 101509314 [+] | 101491439 | 17875 | 66  | 0    | 3  | 0  | 0.56457  |
| hsa-mir-802    | chr21: 37093013 [+]  | 37077286  | 15727 | 27  | 0    | 2  | 0  | 0.08574  |
| hsa-mir-670    | chr11: 43581206 [+]  | 43569577  | 11629 | 14  | 0    | 3  | 0  | 0.40016  |
| hsa-mir-759    | chr13: 53384185 [+]  | 53365045  | 19140 | 59  | 0    | 2  | 0  | 0.02012  |
| hsa-mir-298    | chr20: 57393368 [-]  | 57425957  | 32589 | 7   | 155  | 38 | 2  | 0.70996  |
| hsa-mir-300    | chr14: 101507700 [+] | 101491439 | 16261 | 66  | 0    | 3  | 0  | 0.56465  |
| hsa-mir-892a   | chrX: 145078261 [-]  | 145078831 | 570   | 37  | 0    | 2  | 0  | 4.10E-04 |
| hsa-mir-509-2  | chrX: 146340368 [-]  | 146390339 | 49971 | 100 | 0    | 2  | 0  | 0.18851  |
| hsa-mir-450b   | chrX: 133674292 [-]  | 133680673 | 6381  | 3   | 0    | 2  | 12 | 0.45     |
| hsa-mir-890    | chrX: 145075869 [-]  | 145078831 | 2962  | 37  | 0    | 2  | 0  | 4.10E-04 |
| hsa-mir-888    | chrX: 145076378 [-]  | 145078831 | 2453  | 37  | 0    | 2  | 0  | 4.20E-04 |

|                |                      |           |       |      |       |    |     |          |
|----------------|----------------------|-----------|-------|------|-------|----|-----|----------|
| hsa-mir-892b   | chrX: 145078792 [-]  | 145078831 | 39    | 37   | 0     | 2  | 0   | 3.30E-04 |
| hsa-mir-541    | chr14: 101530832 [+] | 101491439 | 39393 | 66   | 0     | 3  | 0   | 0.58417  |
| hsa-mir-889    | chr14: 101514238 [+] | 101491439 | 22799 | 66   | 0     | 3  | 0   | 0.57551  |
| hsa-mir-190b   | chr1: 154166219 [-]  | 154193113 | 26894 | 0    | 32881 | 46 | 486 | 0.25752  |
| hsa-mir-665    | chr14: 101341370 [+] | 101292454 | 48916 | 2083 | 0     | 6  | 358 | 0.80091  |
| hsa-mir-543    | chr14: 101498324 [+] | 101491439 | 6885  | 66   | 0     | 3  | 0   | 0.58449  |
| hsa-mir-760    | chr1: 94312388 [+]   | 94292348  | 20040 | 52   | 0     | 3  | 0   | 0.04175  |
| hsa-mir-301b   | chr22: 22007270 [+]  | 21996608  | 10662 | 819  | 6     | 32 | 108 | 0.41417  |
| hsa-mir-920    | chr12: 24365355 [+]  | 24338975  | 26380 | 50   | 0     | 1  | 0   | 0.00268  |
| hsa-mir-509-3  | chrX: 146341244 [-]  | 146390339 | 49095 | 100  | 0     | 2  | 0   | 0.20772  |
| hsa-mir-940    | chr16: 2321748 [+]   | 2273659   | 48089 | 1    | 150   | 39 | 70  | 0.94559  |
| hsa-mir-297    | chr4: 111781803 [-]  | 111797978 | 16175 | 139  | 0     | 2  | 0   | 0.15996  |
| hsa-mir-1208   | chr8: 129162362 [+]  | 129121485 | 40877 | 0    | 5     | 2  | 0   | 0.30114  |
| hsa-mir-1285-2 | chr2: 70480137 [-]   | 70520812  | 40675 | 0    | 49980 | 54 | 322 | 0.32563  |
| hsa-mir-1289-1 | chr20: 34041919 [-]  | 34090627  | 48708 | 0    | 338   | 13 | 2   | 0.86965  |
| hsa-mir-1299   | chr9: 69002321 [-]   | 69032078  | 29757 | 5    | 0     | 1  | 0   | 0.00701  |
| hsa-mir-1302-1 | chr12: 113132981 [-] | 113136628 | 3647  | 41   | 0     | 3  | 0   | 0.03973  |
| hsa-mir-1302-2 | chr1: 30366 [+]      | 10842     | 19524 | 13   | 0     | 0  | 0   | 0.03614  |
| hsa-mir-1302-3 | chr2: 114340673 [-]  | 114384658 | 43985 | 0    | 2117  | 4  | 44  | 0.10555  |
| hsa-mir-1302-6 | chr7: 18166932 [-]   | 18173133  | 6201  | 41   | 0     | 0  | 0   | 0.68894  |
| hsa-mir-1302-8 | chr9: 100125963 [-]  | 100174452 | 48489 | 31   | 0     | 29 | 3   | 0.62063  |
| hsa-mir-1303   | chr5: 154065336 [+]  | 154062551 | 2785  | 0    | 241   | 19 | 5   | 0.2113   |
| hsa-mir-1244-1 | chr12: 9392147 [-]   | 9392585   | 438   | 0    | 25    | 7  | 7   | 0.83721  |
| hsa-mir-1246   | chr2: 177465780 [-]  | 177490993 | 25213 | 96   | 0     | 1  | 0   | 0.09412  |
| hsa-mir-1247   | chr14: 102026759 [-] | 102074469 | 47710 | 1056 | 0     | 2  | 0   | 0.05578  |
| hsa-mir-1253   | chr17: 2651476 [-]   | 2699517   | 48041 | 0    | 77    | 73 | 0   | 0.62787  |
| hsa-mir-1257   | chr20: 60528718 [-]  | 60550456  | 21738 | 0    | 16    | 9  | 8   | 0.71598  |
| hsa-mir-548g   | chr4: 148265869 [-]  | 148280562 | 14693 | 69   | 0     | 0  | 0   | 0.02206  |
| hsa-mir-1263   | chr3: 163889344 [-]  | 163938392 | 49048 | 24   | 0     | 1  | 0   | 0.00234  |
| hsa-mir-548m   | chrX: 94318225 [-]   | 94342154  | 23929 | 47   | 0     | 0  | 0   | 0.36418  |
| hsa-mir-1265   | chr10: 14478575 [+]  | 14447281  | 31294 | 0    | 56    | 4  | 0   | 0.00259  |

|                |                      |           |       |      |      |    |     |          |
|----------------|----------------------|-----------|-------|------|------|----|-----|----------|
| hsa-mir-548o   | chr7: 102046302 [-]  | 102073988 | 27686 | 11   | 0    | 9  | 1   | 0.54177  |
| hsa-mir-548h-1 | chr14: 64561843 [-]  | 64586290  | 24447 | 0    | 207  | 5  | 0   | 0.83575  |
| hsa-mir-548h-2 | chr16: 11400384 [-]  | 11439139  | 38755 | 0    | 125  | 25 | 2   | 0.06724  |
| hsa-mir-1275   | chr6: 33967828 [-]   | 34017440  | 49612 | 28   | 0    | 3  | 0   | 0.01024  |
| hsa-mir-548i-2 | chr4: 9557937 [-]    | 9606531   | 48594 | 0    | 31   | 30 | 0   | 0.07432  |
| hsa-mir-548i-4 | chrX: 83480836 [-]   | 83517181  | 36345 | 23   | 0    | 1  | 0   | 0.04104  |
| hsa-mir-1279   | chr12: 69666998 [-]  | 69678016  | 11018 | 21   | 0    | 15 | 0   | 0.07324  |
| hsa-mir-1281   | chr22: 41488517 [+]  | 41460694  | 27823 | 0    | 15   | 0  | 23  | 0.23319  |
| hsa-mir-513b   | chrX: 146280645 [-]  | 146314685 | 34040 | 89   | 0    | 1  | 0   | 0.05078  |
| hsa-mir-513c   | chrX: 146271305 [-]  | 146314685 | 43380 | 89   | 0    | 1  | 0   | 0.04919  |
| hsa-mir-1197   | chr14: 101491901 [+] | 101491439 | 462   | 66   | 0    | 3  | 0   | 0.56465  |
| hsa-mir-1324   | chr3: 75679914 [+]   | 75639730  | 40184 | 198  | 0    | 1  | 0   | 0.04246  |
| hsa-mir-1470   | chr19: 15560359 [+]  | 15535724  | 24635 | 0    | 172  | 11 | 40  | 0.90571  |
| hsa-mir-1471   | chr2: 232757008 [-]  | 232791107 | 34099 | 20   | 0    | 29 | 2   | 0.62032  |
| hsa-mir-1538   | chr16: 69599771 [-]  | 69600164  | 393   | 1935 | 0    | 61 | 0   | 0.99685  |
| hsa-mir-1539   | chr18: 47013743 [+]  | 47013372  | 371   | 12   | 0    | 85 | 1   | 4.00E-05 |
| hsa-mir-103b-1 | chr5: 167987909 [+]  | 167957147 | 30762 | 0    | 16   | 4  | 3   | 0.90697  |
| hsa-mir-103b-2 | chr20: 3898210 [-]   | 3942186   | 43976 | 2    | 0    | 2  | 0   | 0.2296   |
| hsa-mir-320d-1 | chr13: 41302011 [-]  | 41345305  | 43294 | 4    | 1938 | 53 | 134 | 0.02999  |
| hsa-mir-320c-2 | chr18: 21901650 [+]  | 21851937  | 49713 | 23   | 0    | 7  | 0   | 0.18589  |
| hsa-mir-320d-2 | chrX: 140008384 [-]  | 140050697 | 42313 | 23   | 0    | 0  | 0   | 0.11747  |
| hsa-mir-1827   | chr12: 100583662 [+] | 100535657 | 48005 | 0    | 79   | 25 | 0   | 0.53705  |
| hsa-mir-1972-1 | chr16: 15104254 [-]  | 15149887  | 45633 | 6    | 24   | 13 | 56  | 0.26949  |
| hsa-mir-1973   | chr4: 117220881 [+]  | 117219397 | 1484  | 1293 | 0    | 0  | 7   | 0.37661  |
| hsa-mir-2114   | chrX: 149396239 [+]  | 149390740 | 5499  | 53   | 0    | 0  | 0   | 0.0029   |
| hsa-mir-2117   | chr17: 41522174 [+]  | 41476361  | 45813 | 13   | 309  | 48 | 133 | 0.14669  |
| hsa-mir-548q   | chr10: 12767352 [-]  | 12811010  | 43658 | 40   | 0    | 7  | 0   | 3.10E-04 |
| hsa-mir-718    | chrX: 153285440 [-]  | 153296454 | 11014 | 127  | 0    | 5  | 7   | 0.79807  |
| hsa-mir-2861   | chr9: 130548197 [+]  | 130538868 | 9329  | 0    | 400  | 54 | 7   | 0.23807  |
| hsa-mir-3116-2 | chr1: 62544528 [-]   | 62594508  | 49980 | 0    | 186  | 6  | 0   | 0.48291  |
| hsa-mir-3118-3 | chr1: 143424215 [-]  | 143467631 | 43416 | 77   | 0    | 13 | 6   | 0.00589  |

|                |                      |           |       |     |      |    |     |          |
|----------------|----------------------|-----------|-------|-----|------|----|-----|----------|
| hsa-mir-3119-1 | chr1: 170120603 [-]  | 170133088 | 12485 | 49  | 0    | 4  | 0   | 0.02441  |
| hsa-mir-3123   | chr1: 241295572 [+]  | 241277618 | 17954 | 62  | 0    | 0  | 0   | 0.00134  |
| hsa-mir-3124   | chr1: 249120576 [+]  | 249107201 | 13375 | 0   | 6824 | 6  | 2   | 0.8998   |
| hsa-mir-3132   | chr2: 220413869 [-]  | 220436176 | 22307 | 668 | 0    | 8  | 23  | 0.69161  |
| hsa-mir-378b   | chr3: 10371913 [+]   | 10342978  | 28935 | 0   | 212  | 13 | 5   | 0.50906  |
| hsa-mir-3141   | chr5: 153975632 [-]  | 153990220 | 14588 | 495 | 0    | 11 | 0   | 0.10177  |
| hsa-mir-3142   | chr5: 159901409 [+]  | 159895244 | 6165  | 0   | 686  | 52 | 2   | 0.61665  |
| hsa-mir-3143   | chr6: 27115405 [+]   | 27106111  | 9294  | 0   | 3    | 2  | 45  | 0.00197  |
| hsa-mir-3144   | chr6: 120336325 [+]  | 120326870 | 9455  | 0   | 69   | 1  | 1   | 0.0732   |
| hsa-mir-3147   | chr7: 57472731 [+]   | 57436499  | 36232 | 102 | 0    | 1  | 0   | 0.30364  |
| hsa-mir-3149   | chr8: 77879086 [-]   | 77912462  | 33376 | 7   | 0    | 84 | 32  | 0.20508  |
| hsa-mir-3074   | chr9: 97848376 [-]   | 97851479  | 3103  | 0   | 81   | 3  | 0   | 5.60E-04 |
| hsa-mir-3154   | chr9: 131007309 [-]  | 131038220 | 30911 | 0   | 2422 | 34 | 45  | 0.3135   |
| hsa-mir-3158-2 | chr10: 103361254 [-] | 103368681 | 7427  | 0   | 98   | 13 | 0   | 0.59882  |
| hsa-mir-3159   | chr11: 18409334 [+]  | 18387720  | 21614 | 0   | 36   | 5  | 7   | 0.78657  |
| hsa-mir-3166   | chr11: 87909670 [+]  | 87908653  | 1017  | 8   | 0    | 17 | 0   | 0.48618  |
| hsa-mir-3168   | chr13: 41675236 [-]  | 41706935  | 31699 | 4   | 3953 | 63 | 167 | 0.11354  |
| hsa-mir-3169   | chr13: 61774014 [-]  | 61781193  | 7179  | 37  | 0    | 0  | 0   | 0        |
| hsa-mir-1193   | chr14: 101496389 [+] | 101491439 | 4950  | 66  | 0    | 3  | 0   | 0.56953  |
| hsa-mir-323b   | chr14: 101522556 [+] | 101491439 | 31117 | 66  | 0    | 3  | 0   | 0.57886  |
| hsa-mir-3118-4 | chr15: 21038124 [+]  | 21016116  | 22008 | 88  | 0    | 1  | 0   | 0.17932  |
| hsa-mir-3178   | chr16: 2582006 [-]   | 2587967   | 5961  | 15  | 0    | 16 | 0   | 0.55815  |
| hsa-mir-3179-1 | chr16: 14995365 [+]  | 14946913  | 48452 | 19  | 0    | 0  | 1   | 0.0161   |
| hsa-mir-3180-1 | chr16: 15005077 [+]  | 14989917  | 15160 | 0   | 14   | 3  | 11  | 0.16272  |
| hsa-mir-3180-2 | chr16: 16403736 [+]  | 16403136  | 600   | 1   | 0    | 0  | 0   | 0.09771  |
| hsa-mir-3179-2 | chr16: 16394016 [+]  | 16345569  | 48447 | 22  | 0    | 1  | 1   | 0.0013   |
| hsa-mir-3180-3 | chr16: 18496128 [-]  | 18496279  | 151   | 36  | 0    | 0  | 0   | 0        |
| hsa-mir-3179-3 | chr16: 18505834 [-]  | 18554304  | 48470 | 22  | 0    | 0  | 1   | 0.00528  |
| hsa-mir-3184   | chr17: 28444178 [-]  | 28448153  | 3975  | 0   | 176  | 4  | 0   | 0.08126  |
| hsa-mir-3185   | chr17: 46801837 [-]  | 46806074  | 4237  | 2   | 0    | 13 | 50  | 0.88248  |
| hsa-mir-3065   | chr17: 79099677 [+]  | 79071417  | 28260 | 91  | 0    | 6  | 18  | 0.14236  |

|                |                      |           |       |      |        |    |     |          |
|----------------|----------------------|-----------|-------|------|--------|----|-----|----------|
| hsa-mir-3186   | chr17: 79418214 [-]  | 79431623  | 13409 | 0    | 340    | 0  | 1   | 0.22028  |
| hsa-mir-3187   | chr19: 813584 [+]    | 797452    | 16132 | 162  | 140960 | 12 | 403 | 0.64992  |
| hsa-mir-3188   | chr19: 18392887 [+]  | 18390574  | 2313  | 0    | 918    | 29 | 222 | 0.43512  |
| hsa-mir-3190   | chr19: 47730199 [+]  | 47724204  | 5995  | 80   | 0      | 10 | 11  | 0.95717  |
| hsa-mir-3193   | chr20: 30194989 [+]  | 30193092  | 1897  | 20   | 20284  | 53 | 487 | 0.48032  |
| hsa-mir-3195   | chr20: 60639858 [+]  | 60639501  | 357   | 0    | 20     | 31 | 0   | 0.78555  |
| hsa-mir-3118-5 | chr21: 15017171 [-]  | 15037875  | 20704 | 88   | 0      | 0  | 0   | 0.03695  |
| hsa-mir-3197   | chr21: 42539484 [+]  | 42536347  | 3137  | 61   | 0      | 4  | 0   | 0.0291   |
| hsa-mir-3199-1 | chr22: 28316600 [-]  | 28329277  | 12677 | 0    | 90     | 1  | 0   | 0.08204  |
| hsa-mir-3201   | chr22: 48670176 [+]  | 48649582  | 20594 | 31   | 0      | 0  | 0   | 0.04813  |
| hsa-mir-514b   | chrX: 146331748 [-]  | 146351035 | 19287 | 20   | 0      | 2  | 0   | 0.22206  |
| hsa-mir-3202-2 | chrX: 153246627 [-]  | 153285349 | 38722 | 6554 | 0      | 8  | 48  | 0.64559  |
| hsa-mir-4294   | chr10: 50193632 [-]  | 50194526  | 894   | 35   | 0      | 2  | 0   | 0.0021   |
| hsa-mir-4298   | chr11: 1880766 [-]   | 1913366   | 32600 | 61   | 0      | 27 | 17  | 8.40E-04 |
| hsa-mir-4305   | chr13: 40238272 [-]  | 40244256  | 5984  | 88   | 0      | 2  | 0   | 0.02626  |
| hsa-mir-4309   | chr14: 103005981 [+] | 102976060 | 29921 | 1226 | 0      | 7  | 0   | 0.81894  |
| hsa-mir-4307   | chr14: 27377848 [+]  | 27336297  | 41551 | 33   | 0      | 0  | 0   | 0.17681  |
| hsa-mir-4311   | chr15: 66332571 [+]  | 66317283  | 15288 | 30   | 0      | 1  | 0   | 0.53685  |
| hsa-mir-4316   | chr17: 75393136 [-]  | 75398252  | 5116  | 0    | 95     | 6  | 0   | 0.86398  |
| hsa-mir-4314   | chr17: 7991374 [+]   | 7982776   | 8598  | 18   | 6      | 36 | 6   | 0.64441  |
| hsa-mir-4319   | chr18: 42550131 [-]  | 42558168  | 8037  | 0    | 62     | 3  | 0   | 0.38783  |
| hsa-mir-4322   | chr19: 10341089 [+]  | 10317122  | 23967 | 41   | 0      | 11 | 0   | 0.06231  |
| hsa-mir-4323   | chr19: 42637665 [-]  | 42681426  | 43761 | 10   | 8      | 25 | 0   | 0.99988  |
| hsa-mir-4256   | chr1: 113004455 [-]  | 113021936 | 17481 | 49   | 0      | 0  | 0   | 0.06831  |
| hsa-mir-4253   | chr1: 23189719 [-]   | 23233240  | 43521 | 0    | 190    | 5  | 2   | 0.95614  |
| hsa-mir-4252   | chr1: 6489956 [-]    | 6520505   | 30549 | 0    | 12     | 14 | 24  | 0.31953  |
| hsa-mir-4325   | chr20: 55896647 [-]  | 55934250  | 37603 | 51   | 0      | 4  | 5   | 0.08746  |
| hsa-mir-4261   | chr2: 10332797 [-]   | 10379625  | 46828 | 66   | 0      | 2  | 0   | 0.04506  |
| hsa-mir-4266   | chr2: 109930081 [-]  | 109935653 | 5572  | 0    | 347    | 4  | 0   | 0.0013   |
| hsa-mir-4267   | chr2: 110827619 [-]  | 110873396 | 45777 | 23   | 542    | 6  | 84  | 0.38185  |
| hsa-mir-4262   | chr2: 11977112 [-]   | 12015280  | 38168 | 3    | 0      | 4  | 0   | 0.00385  |

|                 |                      |           |       |     |       |    |     |          |
|-----------------|----------------------|-----------|-------|-----|-------|----|-----|----------|
| hsa-mir-4269    | chr2: 240227157 [+]  | 240182677 | 44480 | 38  | 0     | 30 | 0   | 6.70E-04 |
| hsa-mir-4275    | chr4: 28821204 [+]   | 28801527  | 19677 | 51  | 0     | 0  | 0   | 0.05636  |
| hsa-mir-4277    | chr5: 1708983 [-]    | 1733643   | 24660 | 72  | 0     | 3  | 0   | 0.00288  |
| hsa-mir-4279    | chr5: 31936265 [-]   | 31962581  | 26316 | 0   | 48    | 1  | 0   | 0.02484  |
| hsa-mir-4278    | chr5: 6828034 [-]    | 6848575   | 20541 | 512 | 0     | 4  | 0   | 0.05283  |
| hsa-mir-4280    | chr5: 86410771 [-]   | 86418012  | 7241  | 0   | 444   | 0  | 0   | 0.00459  |
| hsa-mir-4282    | chr6: 73677476 [-]   | 73704410  | 26934 | 55  | 0     | 1  | 0   | 0.00245  |
| hsa-mir-4283-1  | chr7: 57023571 [-]   | 57071886  | 48315 | 11  | 0     | 0  | 0   | 0.65606  |
| hsa-mir-4284    | chr7: 73125647 [+]   | 73097927  | 27720 | 4   | 27000 | 54 | 320 | 0.14453  |
| hsa-mir-4291    | chr9: 96581639 [+]   | 96536745  | 44894 | 53  | 0     | 1  | 0   | 0.23038  |
| hsa-mir-1184-2  | chrX: 154612847 [-]  | 154613085 | 238   | 5   | 0     | 0  | 3   | 8.70E-04 |
| hsa-mir-1184-3  | chrX: 154687178 [+]  | 154686940 | 238   | 5   | 0     | 0  | 4   | 0.00169  |
| hsa-mir-1302-9  | chr15: 102500799 [-] | 102520430 | 19631 | 13  | 0     | 1  | 0   | 0.14644  |
| hsa-mir-1302-11 | chr9: 30144 [+]      | 11165     | 18979 | 0   | 23    | 4  | 2   | 0.07767  |
| hsa-mir-3118-6  | chr15: 22049274 [+]  | 22027266  | 22008 | 88  | 0     | 1  | 0   | 0.08627  |
| hsa-mir-4283-2  | chr7: 63081468 [+]   | 63033294  | 48174 | 67  | 0     | 0  | 0   | 0.7511   |
| hsa-mir-3615    | chr17: 72744752 [+]  | 72733394  | 11358 | 31  | 0     | 35 | 42  | 0        |
| hsa-mir-3617    | chr20: 44333819 [-]  | 44374632  | 40813 | 16  | 0     | 0  | 0   | 0        |
| hsa-mir-3622a   | chr8: 27559194 [+]   | 27543344  | 15850 | 0   | 179   | 1  | 0   | 0        |
| hsa-mir-3622b   | chr8: 27559284 [-]   | 27593114  | 33830 | 0   | 7     | 10 | 19  | 0        |
| hsa-mir-3649    | chr12: 1769546 [-]   | 1800041   | 30495 | 0   | 17    | 34 | 0   | 0        |
| hsa-mir-3659    | chr1: 38554903 [+]   | 38512306  | 42597 | 21  | 0     | 12 | 0   | 0        |
| hsa-mir-3660    | chr5: 89312537 [-]   | 89317982  | 5445  | 0   | 4     | 1  | 1   | 0        |
| hsa-mir-3661    | chr5: 133561448 [+]  | 133541775 | 19673 | 0   | 162   | 11 | 2   | 0        |
| hsa-mir-3663    | chr10: 118927285 [-] | 118934696 | 7411  | 5   | 0     | 59 | 0   | 0        |
| hsa-mir-3665    | chr13: 78272251 [-]  | 78272264  | 13    | 33  | 0     | 27 | 0   | 0        |
| hsa-mir-3670-1  | chr16: 15001574 [+]  | 14989917  | 11657 | 0   | 14    | 3  | 11  | 0.17665  |
| hsa-mir-3671    | chr1: 65523525 [-]   | 65533415  | 9890  | 0   | 4659  | 45 | 5   | 0.9389   |
| hsa-mir-3672    | chrX: 120504826 [+]  | 120481451 | 23375 | 10  | 0     | 1  | 0   | 0        |
| hsa-mir-3674    | chr8: 1749291 [+]    | 1711955   | 37336 | 11  | 1434  | 35 | 77  | 0        |
| hsa-mir-3675    | chr1: 17185516 [-]   | 17216129  | 30613 | 0   | 1001  | 52 | 11  | 0        |

|                |                      |           |       |        |        |    |     |         |
|----------------|----------------------|-----------|-------|--------|--------|----|-----|---------|
| hsa-mir-3676   | chr17: 8090493 [+]   | 8063611   | 26882 | 0      | 114    | 9  | 93  | 0       |
| hsa-mir-3677   | chr16: 2320714 [+]   | 2273659   | 47055 | 1      | 150    | 39 | 61  | 0.80823 |
| hsa-mir-3678   | chr17: 73402150 [+]  | 73390227  | 11923 | 0      | 137    | 56 | 1   | 0       |
| hsa-mir-3679   | chr2: 134884696 [+]  | 134877520 | 7176  | 8      | 535    | 49 | 5   | 0       |
| hsa-mir-3683   | chr7: 7106676 [-]    | 7144112   | 37436 | 0      | 63     | 1  | 0   | 0       |
| hsa-mir-3685   | chr12: 95703699 [+]  | 95693246  | 10453 | 1      | 0      | 3  | 5   | 0.75303 |
| hsa-mir-3687   | chr21: 9826203 [+]   | 9826225   | 22    | 0      | 13     | 0  | 0   | 0       |
| hsa-mir-3688-1 | chr4: 160050046 [-]  | 160053052 | 3006  | 0      | 122    | 1  | 1   | 0       |
| hsa-mir-3180-4 | chr16: 15248859 [-]  | 15249481  | 622   | 1      | 0      | 0  | 0   | 0       |
| hsa-mir-3180-5 | chr16: 2186130 [-]   | 2205359   | 19229 | 0      | 7860   | 47 | 32  | 0       |
| hsa-mir-3908   | chr12: 124020956 [+] | 124018175 | 2781  | 84     | 0      | 15 | 0   | 0       |
| hsa-mir-3910-1 | chr9: 94398533 [+]   | 94390223  | 8310  | 90     | 0      | 0  | 0   | 0       |
| hsa-mir-3911   | chr9: 130453074 [-]  | 130497605 | 44531 | 644    | 0      | 26 | 86  | 0       |
| hsa-mir-3912   | chr5: 170813764 [-]  | 170832347 | 18583 | 0      | 160    | 7  | 10  | 0       |
| hsa-mir-3913-1 | chr12: 69978603 [-]  | 70004684  | 26081 | 1      | 300    | 3  | 1   | 0       |
| hsa-mir-3913-2 | chr12: 69978503 [+]  | 69973312  | 5191  | 0      | 29     | 2  | 3   | 0       |
| hsa-mir-3916   | chr1: 247365362 [-]  | 247374150 | 8788  | 10     | 417    | 54 | 6   | 0       |
| hsa-mir-3918   | chr6: 159185785 [-]  | 159187608 | 1823  | 0      | 383    | 11 | 68  | 0       |
| hsa-mir-3150b  | chr8: 96085224 [-]   | 96099988  | 14764 | 91     | 0      | 3  | 0   | 0       |
| hsa-mir-3925   | chr6: 36590289 [-]   | 36607449  | 17160 | 806    | 0      | 2  | 0   | 0       |
| hsa-mir-3927   | chr9: 112273825 [-]  | 112296752 | 22927 | 655562 | 0      | 0  | 15  | 0       |
| hsa-mir-3928   | chr22: 31556105 [-]  | 31599689  | 43584 | 55     | 0      | 4  | 0   | 0       |
| hsa-mir-3929   | chr18: 33514105 [-]  | 33552426  | 38321 | 0      | 2      | 38 | 3   | 0       |
| hsa-mir-3934   | chr6: 33665905 [+]   | 33655444  | 10461 | 0      | 3      | 10 | 0   | 0       |
| hsa-mir-3937   | chrX: 39520470 [+]   | 39497866  | 22604 | 48     | 0      | 1  | 0   | 0       |
| hsa-mir-548y   | chr14: 48230307 [-]  | 48264208  | 33901 | 43     | 0      | 1  | 0   | 0       |
| hsa-mir-3939   | chr6: 167411400 [-]  | 167412570 | 1170  | 0      | 270    | 44 | 5   | 0       |
| hsa-mir-374c   | chrX: 73438384 [+]   | 73393889  | 44495 | 0      | 537    | 2  | 1   | 0       |
| hsa-mir-642b   | chr19: 46178266 [-]  | 46195192  | 16926 | 1      | 721074 | 65 | 380 | 0       |
| hsa-mir-550b-1 | chr7: 30329506 [-]   | 30378058  | 48552 | 25     | 0      | 0  | 0   | 0       |
| hsa-mir-550b-2 | chr7: 32772689 [-]   | 32801498  | 28809 | 17     | 0      | 3  | 1   | 0       |



|                 |                      |           |       |      |      |    |    |   |
|-----------------|----------------------|-----------|-------|------|------|----|----|---|
| hsa-mir-548z    | chr12: 65016385 [-]  | 65058436  | 42051 | 34   | 0    | 3  | 0  | 0 |
| hsa-mir-151b    | chr14: 100575851 [-] | 100594946 | 19095 | 17   | 0    | 31 | 3  | 0 |
| hsa-mir-378d-2  | chr8: 94928347 [-]   | 94969755  | 41408 | 97   | 0    | 0  | 5  | 0 |
| hsa-mir-1254-2  | chr10: 23682334 [+]  | 23632980  | 49354 | 0    | 8    | 7  | 4  | 0 |
| hsa-mir-548h-5  | chr6: 132113312 [+]  | 132067158 | 46154 | 13   | 0    | 1  | 0  | 0 |
| hsa-mir-4417    | chr1: 5624131 [+]    | 5623101   | 1030  | 27   | 0    | 4  | 0  | 0 |
| hsa-mir-4418    | chr1: 22592732 [+]   | 22565992  | 26740 | 39   | 0    | 3  | 0  | 0 |
| hsa-mir-4419a   | chr1: 23384427 [-]   | 23413775  | 29348 | 0    | 9    | 5  | 13 | 0 |
| hsa-mir-378f    | chr1: 24255560 [+]   | 24229281  | 26279 | 51   | 0    | 1  | 2  | 0 |
| hsa-mir-4421    | chr1: 51525509 [+]   | 51519207  | 6302  | 81   | 0    | 2  | 0  | 0 |
| hsa-mir-4422    | chr1: 55691314 [+]   | 55681096  | 10218 | 0    | 7    | 46 | 1  | 0 |
| hsa-mir-4423    | chr1: 85599477 [+]   | 85556134  | 43343 | 71   | 0    | 1  | 0  | 0 |
| hsa-mir-4424    | chr1: 178646884 [+]  | 178613674 | 33210 | 0    | 60   | 1  | 0  | 0 |
| hsa-mir-4426    | chr1: 192685458 [+]  | 192685274 | 184   | 1638 | 8    | 1  | 4  | 0 |
| hsa-mir-4429    | chr2: 11680803 [-]   | 11699965  | 19162 | 28   | 0    | 4  | 0  | 0 |
| hsa-mir-4430    | chr2: 33643583 [+]   | 33623847  | 19736 | 0    | 453  | 3  | 10 | 0 |
| hsa-mir-4433    | chr2: 64567893 [+]   | 64532278  | 35615 | 25   | 0    | 0  | 0  | 0 |
| hsa-mir-4436a   | chr2: 89111884 [+]   | 89065390  | 46494 | 0    | 1134 | 22 | 21 | 0 |
| hsa-mir-548ae-2 | chr5: 57825936 [-]   | 57861021  | 35085 | 0    | 55   | 5  | 0  | 0 |
| hsa-mir-4443    | chr3: 48238054 [+]   | 48222991  | 15063 | 102  | 18   | 0  | 2  | 0 |
| hsa-mir-4445    | chr3: 109321675 [+]  | 109281078 | 40597 | 48   | 0    | 0  | 0  | 0 |
| hsa-mir-4448    | chr3: 183604588 [+]  | 183602519 | 2069  | 7    | 0    | 97 | 0  | 0 |
| hsa-mir-4456    | chr5: 535997 [-]     | 537831    | 1834  | 49   | 0    | 4  | 0  | 0 |
| hsa-mir-4457    | chr5: 1309492 [-]    | 1344980   | 35488 | 17   | 0    | 32 | 49 | 0 |
| hsa-mir-4460    | chr5: 128732840 [-]  | 128775816 | 42976 | 1    | 0    | 3  | 0  | 0 |
| hsa-mir-378h    | chr5: 154209018 [+]  | 154194477 | 14541 | 0    | 415  | 7  | 46 | 0 |
| hsa-mir-4462    | chr6: 37523198 [-]   | 37545439  | 22241 | 0    | 1438 | 0  | 0  | 0 |
| hsa-mir-4463    | chr6: 76138123 [+]   | 76106034  | 32089 | 0    | 575  | 4  | 0  | 0 |
| hsa-mir-4464    | chr6: 91022461 [+]   | 91006524  | 15937 | 17   | 0    | 31 | 0  | 0 |
| hsa-mir-548ai   | chr6: 99572485 [+]   | 99569510  | 2975  | 38   | 0    | 1  | 0  | 0 |
| hsa-mir-4466    | chr6: 157100865 [-]  | 157101589 | 724   | 0    | 351  | 28 | 1  | 0 |

|                |                      |           |       |     |        |    |     |   |
|----------------|----------------------|-----------|-------|-----|--------|----|-----|---|
| hsa-mir-4468   | chr7: 137808504 [+]  | 137805833 | 2671  | 7   | 60     | 3  | 0   | 0 |
| hsa-mir-4470   | chr8: 62627347 [+]   | 62621485  | 5862  | 0   | 179    | 1  | 0   | 0 |
| hsa-mir-4471   | chr8: 101394991 [+]  | 101349856 | 45135 | 0   | 153    | 2  | 1   | 0 |
| hsa-mir-4472-1 | chr8: 143257700 [+]  | 143209035 | 48665 | 36  | 0      | 2  | 0   | 0 |
| hsa-mir-4472-2 | chr12: 116866123 [-] | 116892824 | 26701 | 0   | 81     | 1  | 0   | 0 |
| hsa-mir-4475   | chr9: 36823596 [-]   | 36859598  | 36002 | 28  | 0      | 0  | 0   | 0 |
| hsa-mir-4477a  | chr9: 68415388 [-]   | 68455349  | 39961 | 129 | 0      | 9  | 7   | 0 |
| hsa-mir-4477b  | chr9: 68415308 [+]   | 68413228  | 2080  | 11  | 0      | 62 | 27  | 0 |
| hsa-mir-4478   | chr9: 124882446 [-]  | 124922058 | 39612 | 1   | 259696 | 50 | 186 | 0 |
| hsa-mir-3155b  | chr10: 6194225 [-]   | 6206657   | 12432 | 0   | 232    | 3  | 0   | 0 |
| hsa-mir-548ak  | chr10: 12172815 [-]  | 12221128  | 48313 | 0   | 81     | 6  | 17  | 0 |
| hsa-mir-4482   | chr10: 106028163 [-] | 106072210 | 44047 | 0   | 172    | 20 | 11  | 0 |
| hsa-mir-4483   | chr10: 115537813 [-] | 115546735 | 8922  | 18  | 0      | 1  | 0   | 0 |
| hsa-mir-4484   | chr10: 127508309 [+] | 127461578 | 46731 | 85  | 0      | 3  | 0   | 0 |
| hsa-mir-4488   | chr11: 61276068 [+]  | 61248591  | 27477 | 24  | 0      | 4  | 67  | 0 |
| hsa-mir-548al  | chr11: 74110282 [+]  | 74108651  | 1631  | 0   | 43     | 19 | 1   | 0 |
| hsa-mir-4491   | chr11: 111218482 [+] | 111170033 | 48449 | 14  | 0      | 17 | 4   | 0 |
| hsa-mir-4492   | chr11: 118781417 [+] | 118754603 | 26814 | 0   | 19     | 13 | 61  | 0 |
| hsa-mir-4493   | chr11: 123252220 [-] | 123301784 | 49564 | 17  | 0      | 56 | 1   | 0 |
| hsa-mir-4495   | chr12: 98332899 [-]  | 98348741  | 15842 | 80  | 0      | 3  | 0   | 0 |
| hsa-mir-4496   | chr12: 109029586 [+] | 109022443 | 7143  | 6   | 0      | 55 | 1   | 0 |
| hsa-mir-4502   | chr13: 115039303 [+] | 115000422 | 38881 | 1   | 375    | 21 | 69  | 0 |
| hsa-mir-4505   | chr14: 74225450 [+]  | 74186050  | 39400 | 0   | 456    | 11 | 11  | 0 |
| hsa-mir-2392   | chr14: 101280828 [+] | 101255501 | 25327 | 29  | 0      | 2  | 0   | 0 |
| hsa-mir-4508   | chr15: 23807278 [-]  | 23810584  | 3306  | 0   | 151    | 1  | 0   | 0 |
| hsa-mir-4509-2 | chr15: 28671637 [+]  | 28664048  | 7589  | 25  | 0      | 0  | 0   | 0 |
| hsa-mir-4509-3 | chr15: 28735991 [-]  | 28737891  | 1900  | 22  | 0      | 0  | 0   | 0 |
| hsa-mir-4510   | chr15: 36219057 [+]  | 36177883  | 41174 | 20  | 0      | 3  | 0   | 0 |
| hsa-mir-4513   | chr15: 75081098 [-]  | 75128649  | 47551 | 0   | 58     | 4  | 8   | 0 |
| hsa-mir-4514   | chr15: 81289814 [-]  | 81293857  | 4043  | 7   | 0      | 53 | 11  | 0 |
| hsa-mir-4515   | chr15: 83736087 [+]  | 83735824  | 263   | 546 | 0      | 76 | 0   | 0 |

|                |                      |           |       |      |         |    |      |         |
|----------------|----------------------|-----------|-------|------|---------|----|------|---------|
| hsa-mir-4516   | chr16: 2183120 [+]   | 2141925   | 41195 | 36   | 0       | 19 | 1    | 0.18055 |
| hsa-mir-4520a  | chr17: 6558828 [-]   | 6562992   | 4164  | 123  | 0       | 2  | 0    | 0       |
| hsa-mir-4521   | chr17: 8090263 [+]   | 8063611   | 26652 | 0    | 114     | 9  | 91   | 0       |
| hsa-mir-1269b  | chr17: 12820659 [-]  | 12868660  | 48001 | 33   | 0       | 3  | 0    | 0       |
| hsa-mir-4522   | chr17: 25621022 [-]  | 25630540  | 9518  | 0    | 105     | 7  | 10   | 0       |
| hsa-mir-4523   | chr17: 27717680 [+]  | 27717359  | 321   | 21   | 389     | 54 | 4    | 0       |
| hsa-mir-4529   | chr18: 53146452 [+]  | 53114480  | 31972 | 0    | 177     | 1  | 0    | 0       |
| hsa-mir-4530   | chr19: 39900318 [-]  | 39926588  | 26270 | 54   | 71332   | 80 | 2208 | 0       |
| hsa-mir-4531   | chr19: 45157002 [-]  | 45165729  | 8727  | 0    | 375     | 4  | 0    | 0       |
| hsa-mir-4532   | chr20: 56470450 [+]  | 56425864  | 44586 | 219  | 0       | 1  | 0    | 0       |
| hsa-mir-4534   | chr22: 38384801 [+]  | 38349706  | 35095 | 7    | 3214464 | 48 | 213  | 0       |
| hsa-mir-378i   | chr22: 42319301 [-]  | 42343128  | 23827 | 13   | 991     | 70 | 93   | 0       |
| hsa-mir-4535   | chr22: 49176107 [+]  | 49165515  | 10592 | 281  | 0       | 3  | 1    | 0       |
| hsa-mir-1587   | chrX: 39696815 [+]   | 39680696  | 16119 | 31   | 0       | 11 | 0    | 0       |
| hsa-mir-4536-1 | chrX: 55478015 [-]   | 55515262  | 37247 | 8    | 0       | 55 | 1    | 0       |
| hsa-mir-3976   | chr18: 5840694 [+]   | 5802416   | 38278 | 64   | 0       | 0  | 0    | 0       |
| hsa-mir-4634   | chr5: 174178737 [+]  | 174151591 | 27146 | 6    | 100     | 18 | 29   | 0       |
| hsa-mir-4638   | chr5: 180649633 [-]  | 180670906 | 21273 | 48   | 45455   | 73 | 6173 | 0       |
| hsa-mir-4645   | chr6: 2854341 [-]    | 2903544   | 49203 | 1592 | 0       | 70 | 61   | 0       |
| hsa-mir-4656   | chr7: 4828270 [-]    | 4847260   | 18990 | 33   | 0       | 2  | 0    | 0       |
| hsa-mir-4660   | chr8: 8905955 [+]    | 8860439   | 45516 | 20   | 5104    | 46 | 58   | 0       |
| hsa-mir-4659b  | chr8: 6602761 [-]    | 6612636   | 9875  | 0    | 5869    | 3  | 1    | 0       |
| hsa-mir-4663   | chr8: 124228103 [-]  | 124253617 | 25514 | 1    | 890     | 20 | 47   | 0       |
| hsa-mir-4662b  | chr8: 125834300 [-]  | 125852767 | 18467 | 69   | 0       | 12 | 0    | 0       |
| hsa-mir-4665   | chr9: 6007826 [+]    | 6007156   | 670   | 0    | 6       | 26 | 0    | 0       |
| hsa-mir-4666a  | chr1: 228649775 [+]  | 228645804 | 3971  | 1    | 2098    | 30 | 10   | 0       |
| hsa-mir-2964a  | chr9: 131154900 [+]  | 131133651 | 21249 | 9    | 1406    | 51 | 155  | 0       |
| hsa-mir-4674   | chr9: 139440711 [-]  | 139461472 | 20761 | 73   | 0       | 3  | 0    | 0       |
| hsa-mir-4675   | chr10: 20840899 [+]  | 20794634  | 46265 | 204  | 0       | 1  | 0    | 0       |
| hsa-mir-4678   | chr10: 89263638 [+]  | 89253140  | 10498 | 19   | 0       | 3  | 0    | 0       |
| hsa-mir-4682   | chr10: 121718025 [+] | 121700321 | 17704 | 0    | 151     | 6  | 101  | 0       |

|               |                      |           |       |       |       |    |     |         |
|---------------|----------------------|-----------|-------|-------|-------|----|-----|---------|
| hsa-mir-4686  | chr11: 2194293 [+]   | 2153879   | 40414 | 10    | 0     | 0  | 156 | 0       |
| hsa-mir-4689  | chr1: 5922801 [-]    | 5956874   | 34073 | 0     | 45    | 4  | 9   | 0       |
| hsa-mir-4692  | chr11: 72494575 [+]  | 72492896  | 1679  | 8     | 0     | 7  | 3   | 0       |
| hsa-mir-4694  | chr11: 19781629 [-]  | 19798661  | 17032 | 73    | 0     | 3  | 0   | 0       |
| hsa-mir-4703  | chr13: 52126725 [+]  | 52077672  | 49053 | 0     | 37    | 3  | 0   | 0       |
| hsa-mir-4708  | chr14: 65801901 [-]  | 65807982  | 6081  | 90    | 0     | 0  | 0   | 0       |
| hsa-mir-203b  | chr14: 104583840 [-] | 104604175 | 20335 | 119   | 0     | 16 | 1   | 0       |
| hsa-mir-4710  | chr14: 105144086 [-] | 105173863 | 29777 | 18    | 0     | 10 | 4   | 0       |
| hsa-mir-4712  | chr15: 50652526 [+]  | 50647186  | 5340  | 0     | 65    | 57 | 18  | 0       |
| hsa-mir-4713  | chr15: 51534387 [+]  | 51492977  | 41410 | 26    | 0     | 0  | 0   | 0       |
| hsa-mir-4716  | chr15: 49461350 [-]  | 49470980  | 9630  | 105   | 0     | 7  | 0   | 0       |
| hsa-mir-3529  | chr15: 89155155 [-]  | 89195596  | 40441 | 7     | 0     | 30 | 1   | 0       |
| hsa-mir-4717  | chr16: 2324621 [+]   | 2303924   | 20697 | 0     | 97    | 3  | 31  | 0.2926  |
| hsa-mir-4718  | chr16: 12814178 [+]  | 12798424  | 15754 | 0     | 62    | 13 | 2   | 0       |
| hsa-mir-4720  | chr16: 81418623 [+]  | 81414373  | 4250  | 8     | 0     | 4  | 0   | 0       |
| hsa-mir-4520b | chr17: 6558768 [+]   | 6544380   | 14388 | 0     | 16491 | 84 | 151 | 0       |
| hsa-mir-451b  | chr17: 27188389 [+]  | 27182033  | 6356  | 10163 | 0     | 63 | 429 | 0       |
| hsa-mir-4725  | chr17: 29902288 [+]  | 29860524  | 41764 | 0     | 208   | 9  | 3   | 0.02938 |
| hsa-mir-4727  | chr17: 36982091 [+]  | 36977199  | 4892  | 0     | 5539  | 7  | 4   | 0       |
| hsa-mir-4732  | chr17: 27188748 [-]  | 27224681  | 35933 | 2061  | 0     | 32 | 143 | 0.68008 |
| hsa-mir-4733  | chr17: 29421443 [-]  | 29423139  | 1696  | 0     | 219   | 17 | 1   | 0       |
| hsa-mir-4734  | chr17: 36858584 [-]  | 36890783  | 32199 | 1     | 0     | 8  | 34  | 0       |
| hsa-mir-4736  | chr17: 56413383 [-]  | 56429562  | 16179 | 1     | 53849 | 32 | 273 | 0.46595 |
| hsa-mir-4737  | chr17: 58120466 [-]  | 58165676  | 45210 | 0     | 2052  | 2  | 115 | 0       |
| hsa-mir-4738  | chr17: 73780688 [-]  | 73821301  | 40613 | 39    | 0     | 5  | 0   | 0       |
| hsa-mir-4739  | chr17: 77681058 [-]  | 77711077  | 30019 | 103   | 0     | 3  | 0   | 0       |
| hsa-mir-4740  | chr17: 79374578 [-]  | 79387018  | 12440 | 62    | 0     | 8  | 0   | 0       |
| hsa-mir-3591  | chr18: 56118384 [-]  | 56133681  | 15297 | 39    | 0     | 6  | 0   | 0       |
| hsa-mir-4746  | chr19: 4445975 [+]   | 4402638   | 43337 | 3     | 22805 | 15 | 33  | 0       |
| hsa-mir-4752  | chr19: 54785964 [+]  | 54780709  | 5255  | 57    | 0     | 1  | 0   | 0       |
| hsa-mir-371b  | chr19: 54290996 [-]  | 54330189  | 39193 | 25    | 0     | 2  | 0   | 0       |

|                 |                      |           |       |     |       |    |     |         |
|-----------------|----------------------|-----------|-------|-----|-------|----|-----|---------|
| hsa-mir-4754    | chr19: 58898225 [-]  | 58919821  | 21596 | 0   | 99    | 89 | 20  | 0       |
| hsa-mir-499b    | chr20: 33578275 [-]  | 33589421  | 11146 | 23  | 0     | 7  | 1   | 0       |
| hsa-mir-4757    | chr2: 19548190 [+]   | 19547863  | 327   | 0   | 18    | 54 | 0   | 0       |
| hsa-mir-4759    | chr21: 28326280 [+]  | 28307013  | 19267 | 34  | 0     | 4  | 0   | 0       |
| hsa-mir-4769    | chrX: 47446828 [+]   | 47420605  | 26223 | 573 | 245   | 27 | 348 | 0       |
| hsa-mir-4770    | chrX: 6302004 [-]    | 6340651   | 38647 | 0   | 40    | 0  | 1   | 0       |
| hsa-mir-4778    | chr2: 66585460 [-]   | 66618646  | 33186 | 0   | 76    | 3  | 2   | 0       |
| hsa-mir-4780    | chr2: 88382118 [-]   | 88427578  | 45460 | 0   | 18818 | 0  | 91  | 0       |
| hsa-mir-4783    | chr2: 128181194 [-]  | 128181785 | 591   | 0   | 16    | 2  | 0   | 0       |
| hsa-mir-1245b   | chr2: 189842887 [-]  | 189860876 | 17989 | 161 | 0     | 1  | 1   | 0       |
| hsa-mir-4786    | chr2: 240882511 [-]  | 240900303 | 17792 | 0   | 15    | 5  | 9   | 0       |
| hsa-mir-4787    | chr3: 50712511 [+]   | 50692819  | 19692 | 128 | 0     | 6  | 0   | 0       |
| hsa-mir-4788    | chr3: 134156669 [+]  | 134151287 | 5382  | 0   | 187   | 2  | 1   | 0       |
| hsa-mir-4792    | chr3: 24562926 [-]   | 24563333  | 407   | 10  | 0     | 5  | 0   | 0       |
| hsa-mir-4795    | chr3: 87275427 [-]   | 87276353  | 926   | 0   | 27    | 90 | 2   | 0       |
| hsa-mir-3688-2  | chr4: 160049957 [+]  | 160025306 | 24651 | 0   | 236   | 31 | 1   | 0       |
| hsa-mir-4801    | chr4: 37243613 [-]   | 37246180  | 2567  | 76  | 0     | 3  | 0   | 0       |
| hsa-mir-5001    | chr2: 233415283 [-]  | 233415301 | 18    | 237 | 0     | 70 | 16  | 0       |
| hsa-mir-548ap   | chr15: 86368866 [+]  | 86337798  | 31068 | 19  | 0     | 28 | 0   | 0.35661 |
| hsa-mir-5091    | chr4: 13629489 [+]   | 13629476  | 13    | 6   | 0     | 78 | 6   | 0       |
| hsa-mir-5186    | chr3: 151283783 [-]  | 151289858 | 6075  | 35  | 0     | 0  | 0   | 0       |
| hsa-mir-5188    | chr12: 125400093 [+] | 125397751 | 2342  | 0   | 81    | 8  | 32  | 0       |
| hsa-mir-4436b-2 | chr2: 111042430 [+]  | 111071972 | 29542 | 8   | 0     | 7  | 2   | 0       |
| hsa-mir-4444-2  | chr3: 75263627 [+]   | 75263621  | 6     | 14  | 0     | 0  | 1   | 0       |
| hsa-mir-3670-2  | chr16: 16400227 [+]  | 16398348  | 1879  | 44  | 0     | 0  | 0   | 0.00373 |
| hsa-mir-4524b   | chr17: 67095683 [+]  | 67091860  | 3823  | 23  | 0     | 0  | 0   | 0       |
| hsa-mir-5100    | chr10: 43493011 [+]  | 43471255  | 21756 | 77  | 0     | 4  | 0   | 0       |
| hsa-mir-5580    | chr14: 54415202 [-]  | 54420113  | 4911  | 1   | 2901  | 10 | 41  | 0       |
| hsa-mir-5589    | chr19: 10149030 [+]  | 10107402  | 41628 | 147 | 0     | 1  | 0   | 0       |
| hsa-mir-4536-2  | chrX: 55477928 [+]   | 55477725  | 203   | 1   | 0     | 1  | 0   | 0       |
| hsa-mir-5680    | chr8: 103137660 [+]  | 103136502 | 1158  | 38  | 0     | 19 | 0   | 0       |

|                 |                      |           |       |     |      |    |     |   |
|-----------------|----------------------|-----------|-------|-----|------|----|-----|---|
| hsa-mir-5681a   | chr8: 75460778 [+]   | 75434575  | 26203 | 27  | 0    | 0  | 0   | 0 |
| hsa-mir-548aw   | chr9: 135821094 [+]  | 135785966 | 35128 | 0   | 827  | 9  | 3   | 0 |
| hsa-mir-5684    | chr19: 12897942 [+]  | 12849375  | 48567 | 0   | 6    | 11 | 25  | 0 |
| hsa-mir-5685    | chr6: 53141791 [+]   | 53139974  | 1817  | 0   | 174  | 19 | 1   | 0 |
| hsa-mir-5692c-1 | chr5: 135138764 [-]  | 135160134 | 21370 | 47  | 0    | 1  | 0   | 0 |
| hsa-mir-5686    | chr10: 98901440 [+]  | 98875963  | 25477 | 29  | 43   | 2  | 0   | 0 |
| hsa-mir-5689    | chr6: 10439950 [+]   | 10398233  | 41717 | 0   | 2    | 0  | 31  | 0 |
| hsa-mir-5693    | chr13: 51922775 [-]  | 51968347  | 45572 | 0   | 32   | 5  | 4   | 0 |
| hsa-mir-5694    | chr14: 67908647 [-]  | 67955439  | 46792 | 56  | 0    | 62 | 10  | 0 |
| hsa-mir-5695    | chr19: 13031134 [+]  | 13001973  | 29161 | 608 | 0    | 46 | 203 | 0 |
| hsa-mir-5696    | chr2: 101925912 [+]  | 101878935 | 46977 | 0   | 399  | 16 | 18  | 0 |
| hsa-mir-5700    | chr12: 94955565 [+]  | 94952878  | 2687  | 83  | 0    | 4  | 0   | 0 |
| hsa-mir-5702    | chr2: 227523509 [-]  | 227526624 | 3115  | 0   | 44   | 2  | 0   | 0 |
| hsa-mir-5703    | chr2: 228336848 [+]  | 228335845 | 1003  | 1   | 0    | 6  | 0   | 0 |
| hsa-mir-5692b   | chr21: 44371124 [-]  | 44394143  | 23019 | 1   | 0    | 36 | 1   | 0 |
| hsa-mir-5705    | chr4: 88221735 [-]   | 88244004  | 22269 | 0   | 80   | 4  | 13  | 0 |
| hsa-mir-5707    | chr7: 158384308 [+]  | 158380401 | 3907  | 37  | 0    | 14 | 0   | 0 |
| hsa-mir-5739    | chr22: 28855857 [+]  | 28838831  | 17026 | 1   | 0    | 42 | 1   | 0 |
| hsa-mir-6068    | chr1: 63792655 [-]   | 63803504  | 10849 | 109 | 0    | 0  | 0   | 0 |
| hsa-mir-6069    | chr22: 35732792 [-]  | 35781303  | 48511 | 150 | 0    | 0  | 0   | 0 |
| hsa-mir-6072    | chr10: 2118283 [-]   | 2128781   | 10498 | 59  | 0    | 1  | 0   | 0 |
| hsa-mir-6076    | chr14: 50433117 [+]  | 50433105  | 12    | 0   | 59   | 4  | 0   | 0 |
| hsa-mir-6078    | chr10: 4033352 [+]   | 3985545   | 47807 | 2   | 0    | 9  | 0   | 0 |
| hsa-mir-6080    | chr17: 62776877 [+]  | 62776597  | 280   | 0   | 36   | 25 | 0   | 0 |
| hsa-mir-6082    | chr4: 172107335 [+]  | 172104244 | 3091  | 14  | 0    | 0  | 0   | 0 |
| hsa-mir-6085    | chr15: 62635228 [+]  | 62624089  | 11139 | 43  | 0    | 0  | 0   | 0 |
| hsa-mir-6087    | chrX: 108297772 [+]  | 108285189 | 12583 | 353 | 0    | 0  | 0   | 0 |
| hsa-mir-6088    | chr19: 45939912 [+]  | 45909902  | 30010 | 1   | 669  | 38 | 31  | 0 |
| hsa-mir-6089-1  | chrX: 2527232 [+]    | 2502378   | 24854 | 22  | 0    | 0  | 0   | 0 |
| hsa-mir-6090    | chr11: 128392285 [+] | 128350576 | 41709 | 0   | 2346 | 22 | 1   | 0 |
| hsa-mir-6126    | chr16: 3535469 [-]   | 3559585   | 24116 | 51  | 0    | 8  | 0   | 0 |

|                 |                      |           |       |     |     |    |     |          |
|-----------------|----------------------|-----------|-------|-----|-----|----|-----|----------|
| hsa-mir-6127    | chr1: 22959859 [-]   | 22987861  | 28002 | 0   | 430 | 4  | 123 | 0        |
| hsa-mir-6129    | chr17: 47365816 [-]  | 47372897  | 7081  | 1   | 0   | 2  | 6   | 0        |
| hsa-mir-6131    | chr5: 10478149 [+]   | 10442004  | 36145 | 0   | 30  | 70 | 64  | 0        |
| hsa-mir-6134    | chrX: 28513780 [-]   | 28544415  | 30635 | 216 | 0   | 0  | 0   | 0        |
| hsa-mir-548ay   | chr3: 32547881 [-]   | 32576093  | 28212 | 0   | 26  | 5  | 13  | 0        |
| hsa-mir-6500    | chr1: 51525690 [+]   | 51519207  | 6483  | 81  | 0   | 2  | 0   | 0        |
| hsa-mir-548az   | chr8: 120337411 [+]  | 120304274 | 33137 | 36  | 0   | 1  | 0   | 0        |
| hsa-mir-6503    | chr11: 59976629 [-]  | 60010561  | 33932 | 1   | 12  | 0  | 1   | 0        |
| hsa-mir-6511a-1 | chr16: 15019794 [+]  | 14989917  | 29877 | 0   | 14  | 3  | 11  | 0.12409  |
| hsa-mir-6715b   | chr10: 114059446 [-] | 114102545 | 43099 | 40  | 0   | 0  | 0   | 0        |
| hsa-mir-6720    | chr6: 1390646 [-]    | 1390760   | 114   | 1   | 0   | 18 | 0   | 0        |
| hsa-mir-6723    | chr1: 567793 [-]     | 569481    | 1688  | 13  | 0   | 0  | 268 | 0        |
| hsa-mir-892c    | chrX: 145074344 [-]  | 145078831 | 4487  | 37  | 0   | 2  | 0   | 3.90E-04 |
| hsa-mir-6089-2  | chrY: 2477232 [+]    | 2452378   | 24854 | 22  | 0   | 0  | 0   | 0        |
| hsa-mir-6511a-3 | chr16: 16462733 [+]  | 16434198  | 28535 | 19  | 0   | 0  | 20  | 0        |

**Table S2.** The number of members of 230 miRNA co-expressed gene groups.

| miRNA          | Co-expressed gene # |
|----------------|---------------------|
| hsa-let-7d     | 2                   |
| hsa-let-7f-1   | 4                   |
| hsa-let-7f-2   | 4                   |
| hsa-let-7i     | 47                  |
| hsa-mir-101-1  | 8                   |
| hsa-mir-101-2  | 8                   |
| hsa-mir-103a-1 | 2                   |
| hsa-mir-103a-2 | 2                   |
| hsa-mir-106a   | 18                  |
| hsa-mir-107    | 36                  |
| hsa-mir-10a    | 6                   |
| hsa-mir-10b    | 1                   |
| hsa-mir-1-1    | 884                 |
| hsa-mir-1-2    | 884                 |
| hsa-mir-122    | 261                 |
| hsa-mir-124-1  | 493                 |
| hsa-mir-124-2  | 493                 |
| hsa-mir-124-3  | 493                 |
| hsa-mir-125a   | 7                   |
| hsa-mir-126    | 12                  |
| hsa-mir-127    | 43                  |
| hsa-mir-128-1  | 443                 |
| hsa-mir-128-2  | 443                 |
| hsa-mir-129-1  | 502                 |
| hsa-mir-129-2  | 502                 |
| hsa-mir-130a   | 206                 |
| hsa-mir-130b   | 2                   |
| hsa-mir-132    | 424                 |
| hsa-mir-133a-1 | 2597                |
| hsa-mir-133a-2 | 2597                |
| hsa-mir-133b   | 2735                |
| hsa-mir-134    | 42                  |
| hsa-mir-135a-1 | 56                  |
| hsa-mir-135a-2 | 56                  |
| hsa-mir-135b   | 215                 |
| hsa-mir-137    | 440                 |
| hsa-mir-138-2  | 52                  |
| hsa-mir-139    | 51                  |
| hsa-mir-141    | 35                  |
| hsa-mir-142    | 23                  |
| hsa-mir-143    | 26                  |
| hsa-mir-145    | 11                  |
| hsa-mir-146a   | 25                  |
| hsa-mir-146b   | 12                  |



|                |     |
|----------------|-----|
| hsa-mir-148a   | 40  |
| hsa-mir-148b   | 38  |
| hsa-mir-149    | 51  |
| hsa-mir-150    | 20  |
| hsa-mir-151a   | 1   |
| hsa-mir-152    | 2   |
| hsa-mir-153-1  | 397 |
| hsa-mir-153-2  | 397 |
| hsa-mir-154    | 25  |
| hsa-mir-155    | 23  |
| hsa-mir-15a    | 1   |
| hsa-mir-15b    | 6   |
| hsa-mir-16-1   | 1   |
| hsa-mir-16-2   | 1   |
| hsa-mir-17     | 35  |
| hsa-mir-181a-1 | 9   |
| hsa-mir-181a-2 | 9   |
| hsa-mir-181b-1 | 223 |
| hsa-mir-181b-2 | 223 |
| hsa-mir-181c   | 2   |
| hsa-mir-181d   | 61  |
| hsa-mir-183    | 19  |
| hsa-mir-184    | 176 |
| hsa-mir-188    | 14  |
| hsa-mir-18a    | 1   |
| hsa-mir-190a   | 107 |
| hsa-mir-191    | 132 |
| hsa-mir-192    | 97  |
| hsa-mir-193b   | 215 |
| hsa-mir-194-1  | 119 |
| hsa-mir-194-2  | 119 |
| hsa-mir-196a-1 | 17  |
| hsa-mir-196a-2 | 17  |
| hsa-mir-196b   | 5   |
| hsa-mir-197    | 78  |
| hsa-mir-198    | 238 |
| hsa-mir-199a-1 | 1   |
| hsa-mir-199a-2 | 1   |
| hsa-mir-199b   | 18  |
| hsa-mir-200a   | 2   |
| hsa-mir-200b   | 6   |
| hsa-mir-200c   | 31  |
| hsa-mir-202    | 312 |
| hsa-mir-203a   | 16  |
| hsa-mir-204    | 83  |
| hsa-mir-205    | 4   |

|               |      |
|---------------|------|
| hsa-mir-206   | 2373 |
| hsa-mir-20b   | 2    |
| hsa-mir-210   | 30   |
| hsa-mir-211   | 122  |
| hsa-mir-212   | 3    |
| hsa-mir-215   | 36   |
| hsa-mir-218-1 | 16   |
| hsa-mir-218-2 | 16   |
| hsa-mir-219-1 | 497  |
| hsa-mir-219-2 | 497  |
| hsa-mir-22    | 103  |
| hsa-mir-221   | 3    |
| hsa-mir-222   | 6    |
| hsa-mir-223   | 40   |
| hsa-mir-224   | 254  |
| hsa-mir-23a   | 222  |
| hsa-mir-24-1  | 239  |
| hsa-mir-24-2  | 239  |
| hsa-mir-25    | 3    |
| hsa-mir-26a-1 | 15   |
| hsa-mir-26a-2 | 15   |
| hsa-mir-26b   | 113  |
| hsa-mir-27a   | 287  |
| hsa-mir-27b   | 1    |
| hsa-mir-28    | 31   |
| hsa-mir-299   | 11   |
| hsa-mir-29a   | 3    |
| hsa-mir-29b-1 | 175  |
| hsa-mir-29b-2 | 175  |
| hsa-mir-29c   | 4    |
| hsa-mir-301a  | 186  |
| hsa-mir-30a   | 59   |
| hsa-mir-30b   | 146  |
| hsa-mir-30c-1 | 10   |
| hsa-mir-30c-2 | 10   |
| hsa-mir-30d   | 269  |
| hsa-mir-30e   | 94   |
| hsa-mir-31    | 3    |
| hsa-mir-320a  | 206  |
| hsa-mir-323a  | 29   |
| hsa-mir-324   | 110  |
| hsa-mir-328   | 289  |
| hsa-mir-330   | 497  |
| hsa-mir-331   | 19   |
| hsa-mir-335   | 244  |
| hsa-mir-338   | 427  |

|                |      |
|----------------|------|
| hsa-mir-340    | 550  |
| hsa-mir-342    | 4    |
| hsa-mir-345    | 4    |
| hsa-mir-346    | 473  |
| hsa-mir-34c    | 254  |
| hsa-mir-361    | 2    |
| hsa-mir-362    | 14   |
| hsa-mir-365a   | 3    |
| hsa-mir-369    | 20   |
| hsa-mir-370    | 33   |
| hsa-mir-371a   | 263  |
| hsa-mir-372    | 265  |
| hsa-mir-373    | 266  |
| hsa-mir-374a   | 2    |
| hsa-mir-375    | 40   |
| hsa-mir-376a-1 | 193  |
| hsa-mir-376a-2 | 193  |
| hsa-mir-377    | 263  |
| hsa-mir-378a   | 1956 |
| hsa-mir-379    | 14   |
| hsa-mir-381    | 37   |
| hsa-mir-382    | 43   |
| hsa-mir-383    | 273  |
| hsa-mir-409    | 51   |
| hsa-mir-422a   | 729  |
| hsa-mir-423    | 23   |
| hsa-mir-424    | 254  |
| hsa-mir-425    | 6    |
| hsa-mir-429    | 1    |
| hsa-mir-432    | 25   |
| hsa-mir-433    | 63   |
| hsa-mir-449a   | 336  |
| hsa-mir-450a-1 | 526  |
| hsa-mir-451a   | 123  |
| hsa-mir-452    | 263  |
| hsa-mir-485    | 20   |
| hsa-mir-489    | 186  |
| hsa-mir-490    | 107  |
| hsa-mir-491    | 74   |
| hsa-mir-493    | 180  |
| hsa-mir-494    | 32   |
| hsa-mir-495    | 113  |
| hsa-mir-500a   | 31   |
| hsa-mir-501    | 3    |
| hsa-mir-502    | 5    |
| hsa-mir-503    | 263  |

|                |      |
|----------------|------|
| hsa-mir-505    | 1    |
| hsa-mir-506    | 356  |
| hsa-mir-507    | 358  |
| hsa-mir-508    | 345  |
| hsa-mir-509-1  | 315  |
| hsa-mir-509-2  | 315  |
| hsa-mir-509-3  | 315  |
| hsa-mir-510    | 350  |
| hsa-mir-511-1  | 3    |
| hsa-mir-511-2  | 3    |
| hsa-mir-512-1  | 261  |
| hsa-mir-512-2  | 261  |
| hsa-mir-513a-1 | 358  |
| hsa-mir-513a-2 | 358  |
| hsa-mir-514a-1 | 357  |
| hsa-mir-514a-2 | 357  |
| hsa-mir-514a-3 | 357  |
| hsa-mir-515-1  | 261  |
| hsa-mir-515-2  | 261  |
| hsa-mir-517a   | 783  |
| hsa-mir-518b   | 261  |
| hsa-mir-518c   | 260  |
| hsa-mir-518f   | 261  |
| hsa-mir-519b   | 263  |
| hsa-mir-519c   | 261  |
| hsa-mir-519d   | 261  |
| hsa-mir-519e   | 263  |
| hsa-mir-520a   | 263  |
| hsa-mir-520b   | 256  |
| hsa-mir-520c   | 255  |
| hsa-mir-520e   | 262  |
| hsa-mir-520f   | 249  |
| hsa-mir-521-2  | 263  |
| hsa-mir-523    | 263  |
| hsa-mir-524    | 263  |
| hsa-mir-525    | 263  |
| hsa-mir-526a-1 | 263  |
| hsa-mir-526b   | 263  |
| hsa-mir-7-1    | 44   |
| hsa-mir-7-3    | 44   |
| hsa-mir-9-1    | 499  |
| hsa-mir-9-2    | 499  |
| hsa-mir-93     | 5    |
| hsa-mir-9-3    | 499  |
| hsa-mir-95     | 2091 |
| hsa-mir-96     | 18   |

|             |     |
|-------------|-----|
| hsa-mir-98  | 150 |
| hsa-mir-99b | 174 |

---

**Table S3.** The full list of putative TFs of 225 human miRNAs.

hsa-let-7d

| Matrix_id      | transcription factor | Gene     | PCC       | Occurrence |
|----------------|----------------------|----------|-----------|------------|
| V\$NR1B2_Q6    | NR1B2                | RARB     | 0.217843  | 3          |
| V\$E2F1_Q3     | E2F-1                | E2F1     | 0.212664  | 3          |
| V\$TBX5_Q2     | TBX5                 | TBX5     | 0.13954   | 3          |
| V\$E2F1_Q6_Q1  | E2F-1                | E2F1     | 0.212664  | 3          |
| V\$AP2REP_Q1   | AP-2rep              | KLF12    | 0.201937  | 3          |
| V\$RNF96_Q1    | RNF96                | TRIM28   | 0.0106128 | 3          |
| V\$TTF1_Q5     | TTF-1                | NKX2-1   | 0.56838   | 3          |
| V\$HNF4A_Q6_Q1 | HNF-4alpha           | HNF4A    | 0.0239993 | 3          |
| V\$HIF1A_Q6    | HIF-1alpha           | HIF1A    | 0.346466  | 3          |
| V\$PUR1_Q4     | PUR1                 | PURA     | 0.370554  | 3          |
| V\$PAX8_Q1     | Pax-8                | PAX8     | 0.664907  | 3          |
| V\$SOX9_Q4     | SOX9                 | SOX9     | 0.157758  | 3          |
| V\$MAFB_Q1     | MAFB                 | MAFB     | 0.0648627 | 3          |
| V\$CDX2_Q5_Q2  | CDX-2                | CDX2     | 0.132877  | 3          |
| V\$LRF_Q2      | LRF                  | ZBTB7A   | 0.208006  | 3          |
| V\$NKX32_Q1    | Nkx3-2               | NKX3-2   | 0.150967  | 3          |
| V\$IK_Q5       | Ikaros               | IKZF1    | 0.162701  | 3          |
| V\$SP1_Q1      | Sp1                  | SP1      | 0.16392   | 3          |
| V\$ARNT_Q1     | Arnt                 | ARNT     | 0.115811  | 3          |
| V\$YY1_Q1      | YY1                  | YY1      | 0.40292   | 3          |
| V\$CDX2_Q1     | Cdx-2                | CDX2     | 0.132877  | 2          |
| V\$TCF4_Q1     | TCF-4                | TCF7L2   | 0.181813  | 2          |
| V\$ZBP89_Q4    | ZBP89                | ZNF148   | 0.49716   | 2          |
| V\$GABPA_Q4    | GABP-alpha           | GABPA    | 0.0665612 | 2          |
| V\$ZFX_Q1      | Zfx                  | ZFX      | 0.266894  | 2          |
| V\$PDEF_Q2     | PDEF                 | SPDEF    | 0.182224  | 2          |
| V\$NKX22_Q2    | NKX2B                | NKX2-2   | 0.142135  | 2          |
| V\$SP1_Q2      | SP1                  | SP1      | 0.16392   | 2          |
| V\$BEN_Q1      | BEN                  | GTF2IRD1 | 0.324806  | 2          |
| V\$ERG_Q1      | ERG                  | ERG      | 0.0322723 | 2          |
| V\$AP2BETA_Q3  | AP-2beta             | TFAP2B   | 0.151932  | 2          |
| V\$AP4_Q6_Q2   | AP-4                 | TFAP4    | 0.520819  | 2          |
| V\$CETS1_Q6    | C-ets-1              | ETS1     | 0.108727  | 2          |
| V\$SPI1_Q3     | SPI1                 | SPI1     | 0.0691841 | 2          |
| V\$PET1_Q2     | Pet-1                | FEV      | 0.263222  | 2          |
| V\$ETV7_Q1     | ETV7                 | ETV7     | 0.17368   | 2          |
| V\$TEL1_Q2     | TEL1                 | ETV6     | 0.220726  | 2          |
| V\$ETV3_Q2     | ETV3                 | ETV3     | 0.0164795 | 2          |
| V\$ER71_Q2     | ER71                 | ETV2     | 0.136421  | 2          |
| V\$ERG_Q3      | ERG                  | ERG      | 0.0322723 | 2          |
| V\$ERF_Q2      | ERF                  | ERF      | 0.19843   | 2          |

|                |           |         |           |   |
|----------------|-----------|---------|-----------|---|
| V\$ELK1_Q6     | ELK-1     | ELK1    | 0.17819   | 2 |
| V\$Elf5_Q3     | ELF5      | ELF5    | 0.197539  | 2 |
| V\$EHF_Q3      | EHF       | EHF     | 0.181625  | 2 |
| V\$WT1_Q6_Q1   | WT1       | WT1     | 0.0142041 | 2 |
| V\$PBX1_Q3     | Pbx1      | PBX1    | 0.460525  | 2 |
| V\$EGR1_Q2     | EGR-1     | EGR1    | 0.335899  | 2 |
| V\$YY1_Q6_Q3   | YY1       | YY1     | 0.40292   | 2 |
| V\$SMAD4_Q6_Q1 | Smad4     | SMAD4   | 0.308817  | 2 |
| V\$GABPBETA_Q3 | GABP-beta | GABPB1  | 0.376782  | 2 |
| V\$NKX2B_Q3    | NKX2B     | NKX2-2  | 0.142135  | 2 |
| V\$ETS2_Q6     | c-Ets-2   | ETS2    | 0.204252  | 2 |
| V\$TFII_Q6     | TFII-I    | GTF2I   | 0.387066  | 2 |
| V\$SP1_Q6_Q1   | Sp1       | SP1     | 0.16392   | 2 |
| V\$SP1_Q6      | Sp1       | SP1     | 0.16392   | 2 |
| V\$YY1_Q6      | YY1       | YY1     | 0.40292   | 2 |
| V\$PAX3_B      | Pax-3     | PAX3    | 0.443837  | 2 |
| V\$GATA1_Q1    | GATA-1    | GATA1   | 0.353108  | 2 |
| V\$ZIC3_Q1     | Zic3      | ZIC3    | 0.265518  | 2 |
| V\$ELF1_Q6     | Elf-1     | ELF1    | 0.148091  | 2 |
| V\$MAZ_Q6      | MAZ       | MAZ     | 0.12945   | 2 |
| V\$PEA3_Q6     | PEA3      | ETV4    | 0.0404392 | 2 |
| V\$SMAD3_Q6    | SMAD3     | SMAD3   | 0.284121  | 2 |
| V\$SP1_Q4_Q1   | Sp1       | SP1     | 0.16392   | 2 |
| V\$SP1_Q2_Q1   | Sp1       | SP1     | 0.16392   | 2 |
| V\$CMYB_Q1     | c-Myb     | MYB     | 0.274576  | 2 |
| V\$SAP1A_Q1    | SAP-1a    | ELK4    | 0.158937  | 2 |
| V\$ELK1_Q1     | Elk-1     | ELK1    | 0.17819   | 2 |
| V\$ELK1_Q2     | Elk-1     | ELK1    | 0.17819   | 2 |
| V\$E2F1_Q3_Q1  | E2F-1     | E2F1    | 0.212664  | 2 |
| V\$STAF_Q2     | Staf      | ZNF143  | 0.263938  | 1 |
| V\$E12_Q6      | E12       | TCF3    | 0.153493  | 1 |
| V\$MAZ_Q6_Q1   | MAZ       | MAZ     | 0.12945   | 1 |
| V\$SP3_Q3      | Sp3       | SP3     | 0.237637  | 1 |
| V\$MAX_Q1      | Max       | MAX     | 0.321685  | 1 |
| V\$MYOD_Q6     | MyoD      | MYOD1   | 0.0331499 | 1 |
| V\$YY1_Q3      | YY1       | YY1     | 0.40292   | 1 |
| V\$E4F1_Q6_Q1  | E4F1      | E4F1    | 0.504233  | 1 |
| V\$ARNT_Q2     | Arnt      | ARNT    | 0.115811  | 1 |
| V\$ZID_Q1      | ZID       | ZBTB6   | 0.0471627 | 1 |
| V\$ZIC1_Q1     | Zic1      | ZIC1    | 0.256711  | 1 |
| V\$E47_Q2      | E47       | TCF3    | 0.153493  | 1 |
| V\$SPIB_Q3     | Spi-B     | SPIB    | 0.0665149 | 1 |
| V\$E2F1_Q6     | E2F-1     | E2F1    | 0.212664  | 1 |
| V\$OC2_Q3      | OC-2      | ONECUT2 | 0.320577  | 1 |
| V\$TEF1_Q6     | TEF-1     | TEAD1   | 0.205679  | 1 |
| V\$MYOGENIN_Q6 | myogenin  | MYOG    | 0.122675  | 1 |

|                |       |               |           |   |
|----------------|-------|---------------|-----------|---|
| V\$E2A_Q2      | E2A   | TCF3          | 0.153493  | 1 |
| V\$MYOD_Q6_01  | MyoD  | MYOD1         | 0.0331499 | 1 |
| V\$PBX1_Q4     | Pbx1  | PBX1          | 0.460525  | 1 |
| V\$E2A_Q6      | E2A   | TCF3          | 0.153493  | 1 |
| V\$YY1_Q6_02   | YY1   | YY1           | 0.40292   | 1 |
| V\$IRF3_Q3     | IRF-3 | IRF3          | 0.340956  | 1 |
| V\$SP4_Q5      | SP4   | SP4           | 0.27079   | 1 |
| V\$CNOT3_Q1    | CNOT3 | CNOT3         | 0.10391   | 1 |
| V\$WT1_Q6      | WT1   | WT1           | 0.0142041 | 1 |
| V\$ELF5_Q1     | ELF5  | ELF5          | 0.197539  | 1 |
| V\$BEN_Q2      | BEN   | GTF2IRD1      | 0.324806  | 1 |
| V\$SP2_Q1      | SP2   | SP2           | 0.390237  | 1 |
| V\$TEF1_Q6_Q3  | TEF-1 | TEAD1         | 0.205679  | 1 |
| V\$SMAD3_Q6_Q1 | Smad3 | SMAD3         | 0.284121  | 1 |
| V\$USF2_Q6     | USF2  | USF2          | 0.481291  | 1 |
| V\$SMAD4_Q6    | SMAD4 | SMAD4         | 0.308817  | 1 |
| V\$ATF4_Q6     | ATF-4 | ATF4          | 0.141526  | 1 |
| V\$ATF2_Q5     | ATF-2 | ATF2          | 0.381982  | 1 |
| V\$ATF1_Q6_Q1  | ATF-1 | ATF1          | 0.646826  | 1 |
| V\$AML1_Q6     | AML1  | RUNX1         | 0.235418  | 1 |
| V\$DEC2_Q2     |       | 2-Dec BHLHE41 | 0.563678  | 1 |
| V\$MAX_Q6      | MAX   | MAX           | 0.321685  | 1 |
| V\$CREM_Q6     | CREM  | CREM          | 0.122916  | 1 |
| V\$PARP_Q3     | PARP  | PARP1         | 0.104683  | 1 |

hsa-let-7f-1

| Matrix_id      | transcription factor | Gene   | PCC      | Occurrence |
|----------------|----------------------|--------|----------|------------|
| V\$TCF4_Q5     | TCF-4                | TCF7L2 | 0.167176 | 5          |
| V\$SOX9_B1     | SOX9                 | SOX9   | 0.166783 | 5          |
| V\$MAFB_Q1     | MAFB                 | MAFB   | 0.125766 | 5          |
| V\$ZIC3_Q1     | Zic3                 | ZIC3   | 0.476662 | 5          |
| V\$NKX32_Q1    | Nkx3-2               | NKX3-2 | 0.21476  | 5          |
| V\$IK_Q5       | Ikaros               | IKZF1  | 0.120097 | 5          |
| V\$HNF4A_Q6_Q1 | HNF-4alpha           | HNF4A  | 0.275799 | 5          |
| V\$PARP_Q4     | PARP                 | PARP1  | 0.12812  | 5          |
| V\$SRY_Q2      | SRY                  | SRY    | 0.179    | 5          |
| V\$SOX9_Q4     | SOX9                 | SOX9   | 0.166783 | 5          |
| V\$P300_Q1     | p300                 | EP300  | 0.262498 | 5          |
| V\$SOX5_Q1     | SOX5                 | SOX5   | 0.216083 | 5          |
| V\$YY1_Q1      | YY1                  | YY1    | 0.396304 | 5          |
| V\$GATA1_Q1    | GATA-1               | GATA1  | 0.475532 | 5          |
| V\$NR1B2_Q6    | NR1B2                | RARB   | 0.359067 | 5          |



|                |            |          |           |   |
|----------------|------------|----------|-----------|---|
| V\$PUR1_Q4     | PUR1       | PURA     | 0.346986  | 5 |
| V\$TBP_Q6      | TBP        | TBP      | 0.0323614 | 4 |
| V\$ELF1_Q6     | Elf-1      | ELF1     | 0.0247277 | 4 |
| V\$HIF1A_Q6    | HIF-1alpha | HIF1A    | 0.334539  | 4 |
| V\$BEN_01      | BEN        | GTF2IRD1 | 0.33885   | 4 |
| V\$IPF1_01     | IPF1       | PDX1     | 0.350797  | 4 |
| V\$ETS2_Q6     | c-Ets-2    | ETS2     | 0.157383  | 4 |
| V\$TBX5_02     | TBX5       | TBX5     | 0.225643  | 4 |
| V\$PARP_Q3     | PARP       | PARP1    | 0.12812   | 4 |
| V\$CMYB_Q5     | c-Myb      | MYB      | 0.064287  | 4 |
| V\$SP2_01      | SP2        | SP2      | 0.505953  | 4 |
| V\$FKLF_Q5     | FKLF       | KLF11    | 0.141546  | 4 |
| V\$NFAT2_Q5    | NF-AT2     | NFATC1   | 0.297007  | 4 |
| V\$TCF4_01     | TCF-4      | TCF7L2   | 0.167176  | 4 |
| V\$CETS1_Q6    | C-ets-1    | ETS1     | 0.333032  | 4 |
| V\$TCF3_01     | TCF-3      | TCF7L1   | 0.409469  | 4 |
| V\$ERBETA_Q5   | ER-beta    | ESR2     | 0.0658926 | 4 |
| V\$IRF4_Q6     | IRF-4      | IRF4     | 0.343543  | 4 |
| V\$NFAT4_Q3    | NF-AT4     | NFATC3   | 0.0345672 | 4 |
| V\$SMAD3_Q6_01 | Smad3      | SMAD3    | 0.261458  | 4 |
| V\$SMAD4_Q6_01 | Smad4      | SMAD4    | 0.326552  | 4 |
| V\$HNF1_02     | HNF-1alpha | HNF1A    | 0.236484  | 4 |
| V\$YY1_Q6_03   | YY1        | YY1      | 0.396304  | 4 |
| V\$Elf5_Q3     | ELF5       | ELF5     | 0.206314  | 4 |
| V\$ER71_02     | ER71       | ETV2     | 0.400414  | 4 |
| V\$GATA2_02    | GATA-2     | GATA2    | 0.0627379 | 4 |
| V\$ARNT_01     | Arnt       | ARNT     | 0.193224  | 4 |
| V\$GATA6_01    | GATA-6     | GATA6    | 0.179109  | 4 |
| V\$GATA1_04    | GATA-1     | GATA1    | 0.475532  | 4 |
| V\$SP1_Q6      | Sp1        | SP1      | 0.222982  | 4 |
| V\$TEL1_02     | TEL1       | ETV6     | 0.202309  | 4 |
| V\$GATA1_06    | GATA-1     | GATA1    | 0.475532  | 4 |
| V\$PEA3_Q6     | PEA3       | ETV4     | 0.0580077 | 4 |
| V\$SP1_01      | Sp1        | SP1      | 0.222982  | 4 |
| V\$GR_Q6       | GR         | NR3C1    | 0.38144   | 4 |
| V\$CDX2_Q5_02  | CDX-2      | CDX2     | 0.187121  | 4 |
| V\$MYB_Q6      | c-Myb      | MYB      | 0.064287  | 4 |
| V\$GATA1_02    | GATA-1     | GATA1    | 0.475532  | 4 |
| V\$OC2_Q3      | OC-2       | ONECUT2  | 0.441936  | 4 |
| V\$ETV3_02     | ETV3       | ETV3     | 0.0724637 | 4 |
| V\$TFII-Q6     | TFII-I     | GTF2I    | 0.522362  | 4 |
| V\$ELK1_02     | Elk-1      | ELK1     | 0.331426  | 4 |
| V\$GATA1_05    | GATA-1     | GATA1    | 0.475532  | 4 |
| V\$AP2REP_01   | AP-2rep    | KLF12    | 0.250664  | 4 |
| V\$GATA2_03    | GATA-2     | GATA2    | 0.0627379 | 3 |
| V\$LHX3b_01    | LHX3b      | LHX3     | 0.353531  | 3 |

|                |            |        |           |   |
|----------------|------------|--------|-----------|---|
| V\$SP1_02      | SP1        | SP1    | 0.222982  | 3 |
| V\$MEIS1_01    | MEIS1      | MEIS1  | 0.0341909 | 3 |
| V\$NKX22_02    | NKX2B      | NKX2-2 | 0.0441284 | 3 |
| V\$NCX_02      | Ncx        | TLX2   | 0.179059  | 3 |
| V\$ETS1_B      | c-Ets-1    | ETS1   | 0.333032  | 3 |
| V\$MITF_Q6     | MITF       | MITF   | 0.371673  | 3 |
| V\$GABPBETA_Q3 | GABP-beta  | GABPB1 | 0.459125  | 3 |
| V\$NKX2B_Q3    | NKX2B      | NKX2-2 | 0.0441284 | 3 |
| V\$FOXP3_01    | FOXP3      | FOXP3  | 0.226657  | 3 |
| V\$EHF_03      | EHF        | EHF    | 0.0714727 | 3 |
| V\$ZBP89_Q4    | ZBP89      | ZNF148 | 0.362883  | 3 |
| V\$EGR1_02     | EGR-1      | EGR1   | 0.274623  | 3 |
| V\$IPF1_Q6     | IPF1       | PDX1   | 0.350797  | 3 |
| V\$ETV7_01     | ETV7       | ETV7   | 0.240579  | 3 |
| V\$GABPA_Q4    | GABP-alpha | GABPA  | 0.0261077 | 3 |
| V\$TBX5_01     | TBX5       | TBX5   | 0.225643  | 3 |
| V\$TTF1_Q5     | TTF-1      | NKX2-1 | 0.549287  | 3 |
| V\$ESE1_02     | ESE-1      | ELF3   | 0.0302076 | 3 |
| V\$ZFX_01      | Zfx        | ZFX    | 0.225822  | 3 |
| V\$SP1_Q4_01   | Sp1        | SP1    | 0.222982  | 3 |
| V\$SP1_Q6_01   | Sp1        | SP1    | 0.222982  | 3 |
| V\$ELK1_06     | ELK-1      | ELK1   | 0.331426  | 3 |
| V\$ERF_02      | ERF        | ERF    | 0.199647  | 3 |
| V\$LRF_Q2      | LRF        | ZBTB7A | 0.366758  | 3 |
| V\$FOXO3A_Q1   | FOXO3A     | FOXO3  | 0.153395  | 3 |
| V\$ESE1_Q3     | ESE-1      | ELF3   | 0.0302076 | 3 |
| V\$DAX1_01     | Dax1       | NR0B1  | 0.184728  | 3 |
| V\$HNF3B_Q6    | HNF-3beta  | FOXA2  | 0.0973956 | 3 |
| V\$SP1_Q2_01   | Sp1        | SP1    | 0.222982  | 3 |
| V\$PET1_02     | Pet-1      | FEV    | 0.466246  | 3 |
| V\$IPF1_Q4     | IPF1       | PDX1   | 0.350797  | 3 |
| V\$FAC1_01     | FAC1       | BPTF   | 0.118777  | 3 |
| V\$IPF1_Q4_01  | IPF1       | PDX1   | 0.350797  | 3 |
| V\$ZIC1_01     | Zic1       | ZIC1   | 0.144175  | 3 |
| V\$MAX_Q6      | MAX        | MAX    | 0.444138  | 2 |
| V\$HOXD9_Q2    | Hoxd9      | HOXD9  | 0.426109  | 2 |
| V\$PBX1_Q3     | Pbx1       | PBX1   | 0.387493  | 2 |
| V\$PDEF_02     | PDEF       | SPDEF  | 0.383401  | 2 |
| V\$ERG_03      | ERG        | ERG    | 0.153297  | 2 |
| V\$GFI1_Q6_01  | Gfi1       | GFI1   | 0.130711  | 2 |
| V\$ATF1_Q6_01  | ATF-1      | ATF1   | 0.489274  | 2 |
| V\$MAX_01      | Max        | MAX    | 0.444138  | 2 |
| V\$SP4_Q5      | SP4        | SP4    | 0.240922  | 2 |
| V\$CNOT3_01    | CNOT3      | CNOT3  | 0.25576   | 2 |
| V\$NANOG_02    | Nanog      | NANOG  | 0.281388  | 2 |
| V\$SOX10_Q6    | SOX10      | SOX10  | 0.16417   | 2 |

|               |           |               |           |   |
|---------------|-----------|---------------|-----------|---|
| V\$GFI1_Q6    | Gfi1      | GFI1          | 0.130711  | 2 |
| V\$YY1_Q6_02  | YY1       | YY1           | 0.396304  | 2 |
| V\$CIZ_01     | CIZ       | ZNF384        | 0.260205  | 2 |
| V\$SMAD4_Q6   | SMAD4     | SMAD4         | 0.326552  | 2 |
| V\$USF2_Q6    | USF2      | USF2          | 0.486612  | 2 |
| V\$SMAD3_Q6   | SMAD3     | SMAD3         | 0.261458  | 2 |
| V\$ARNT_02    | Arnt      | ARNT          | 0.193224  | 2 |
| V\$FOXJ2_01   | FOXJ2     | FOXJ2         | 0.295646  | 2 |
| V\$PAX3_B     | Pax-3     | PAX3          | 0.534025  | 2 |
| V\$STAT4_Q5   | STAT4     | STAT4         | 0.197478  | 2 |
| V\$CDX2_01    | Cdx-2     | CDX2          | 0.187121  | 2 |
| V\$RORBETA_Q2 | RORBETA   | RORB          | 0.159092  | 2 |
| V\$PITX3_Q2   | PITX3     | PITX3         | 0.211989  | 2 |
| V\$CDX2_Q5_01 | Cdx-2     | CDX2          | 0.187121  | 2 |
| V\$CREM_Q6    | CREM      | CREM          | 0.215295  | 2 |
| V\$HNF1B_01   | HNF-1beta | HNF1B         | 0.307825  | 2 |
| V\$MEIS1_02   | Meis1     | MEIS1         | 0.0341909 | 2 |
| V\$SREBP1_01  | SREBP-1   | SREBF1        | 0.130259  | 1 |
| V\$DEC2_Q2    |           | 2-Dec BHLHE41 | 0.403748  | 1 |
| V\$EVI1_02    | Evi-1     | MECOM         | 0.285835  | 1 |
| V\$PITX2_Q2   | Pitx2     | PITX2         | 0.0241907 | 1 |
| V\$E2F1_Q6    | E2F-1     | E2F1          | 0.38014   | 1 |
| V\$E2F1_Q3    | E2F-1     | E2F1          | 0.38014   | 1 |
| V\$E2F4_Q6    | E2F-4     | E2F4          | 0.0808061 | 1 |
| V\$ERG_01     | ERG       | ERG           | 0.153297  | 1 |
| V\$CDX1_01    | Cdx-1     | CDX1          | 0.0207746 | 1 |
| V\$PAX8_01    | Pax-8     | PAX8          | 0.714106  | 1 |
| V\$CDX2_Q5    | Cdx-2     | CDX2          | 0.187121  | 1 |
| V\$HOXA9_01   | hoxa9     | HOXA9         | 0.354511  | 1 |
| V\$CRX_02     | Crx       | CRX           | 0.220501  | 1 |
| V\$PITX2_01   | PITX2     | PITX2         | 0.0241907 | 1 |
| V\$CRX_Q4_01  | CRX       | CRX           | 0.220501  | 1 |
| V\$PITX1_01   | Pitx1     | PITX1         | 0.231602  | 1 |
| V\$E2F1_Q6_01 | E2F-1     | E2F1          | 0.38014   | 1 |
| V\$IRF3_Q3    | IRF-3     | IRF3          | 0.462128  | 1 |
| V\$E2F1_Q3_01 | E2F-1     | E2F1          | 0.38014   | 1 |
| V\$GFI1B_01   | Gfi1b     | GFI1B         | 0.273257  | 1 |
| V\$ATF2_Q5    | ATF-2     | ATF2          | 0.386045  | 1 |
| V\$ATF4_Q6    | ATF-4     | ATF4          | 0.0610864 | 1 |

hsa-let-7f-2

| Matrix_id | transcription factor | Gene | PCC | Occurrence |
|-----------|----------------------|------|-----|------------|
|-----------|----------------------|------|-----|------------|

|                |            |         |           |   |
|----------------|------------|---------|-----------|---|
| V\$TCF4_Q5     | TCF-4      | TCF7L2  | 0.167176  | 5 |
| V\$PUR1_Q4     | PUR1       | PURA    | 0.346986  | 5 |
| V\$ZIC3_01     | Zic3       | ZIC3    | 0.476662  | 5 |
| V\$HNF4A_Q6_01 | HNF-4alpha | HNF4A   | 0.275799  | 5 |
| V\$PARP_Q4     | PARP       | PARP1   | 0.12812   | 5 |
| V\$SOX9_Q4     | SOX9       | SOX9    | 0.166783  | 5 |
| V\$SRY_02      | SRY        | SRY     | 0.179     | 5 |
| V\$NR1B2_Q6    | NR1B2      | RARB    | 0.359067  | 5 |
| V\$NKX32_01    | Nkx3-2     | NKX3-2  | 0.21476   | 5 |
| V\$AML1_Q6     | AML1       | RUNX1   | 0.278907  | 5 |
| V\$P300_01     | p300       | EP300   | 0.262498  | 5 |
| V\$SOX5_01     | SOX5       | SOX5    | 0.216083  | 5 |
| V\$YY1_01      | YY1        | YY1     | 0.396304  | 5 |
| V\$MAFB_01     | MAFB       | MAFB    | 0.125766  | 5 |
| V\$SOX9_B1     | SOX9       | SOX9    | 0.166783  | 5 |
| V\$HNF1_02     | HNF-1alpha | HNF1A   | 0.236484  | 4 |
| V\$ELF1_Q6     | Elf-1      | ELF1    | 0.0247277 | 4 |
| V\$HIF1A_Q6    | HIF-1alpha | HIF1A   | 0.334539  | 4 |
| V\$TFII_Q6     | TFII-I     | GTF2I   | 0.522362  | 4 |
| V\$TBP_Q6      | TBP        | TBP     | 0.0323614 | 4 |
| V\$YY1_Q6_03   | YY1        | YY1     | 0.396304  | 4 |
| V\$TCF4_01     | TCF-4      | TCF7L2  | 0.167176  | 4 |
| V\$IPF1_01     | IPF1       | PDX1    | 0.350797  | 4 |
| V\$PARP_Q3     | PARP       | PARP1   | 0.12812   | 4 |
| V\$ERBETA_Q5   | ER-beta    | ESR2    | 0.0658926 | 4 |
| V\$PBX1_04     | Pbx1       | PBX1    | 0.387493  | 4 |
| V\$MEF2C_Q4    | MEF-2C     | MEF2C   | 0.115352  | 4 |
| V\$FKLF_Q5     | FKLF       | KLF11   | 0.141546  | 4 |
| V\$NFAT4_Q3    | NF-AT4     | NFATC3  | 0.0345672 | 4 |
| V\$PEA3_Q6     | PEA3       | ETV4    | 0.0580077 | 4 |
| V\$YY1_Q6      | YY1        | YY1     | 0.396304  | 4 |
| V\$ARNT_01     | Arnt       | ARNT    | 0.193224  | 4 |
| V\$NFAT2_Q5    | NF-AT2     | NFATC1  | 0.297007  | 4 |
| V\$GR_Q6       | GR         | NR3C1   | 0.38144   | 4 |
| V\$GATA1_04    | GATA-1     | GATA1   | 0.475532  | 4 |
| V\$GATA1_02    | GATA-1     | GATA1   | 0.475532  | 4 |
| V\$OC2_Q3      | OC-2       | ONECUT2 | 0.441936  | 4 |
| V\$TCF3_01     | TCF-3      | TCF7L1  | 0.409469  | 4 |
| V\$ELK1_02     | Elk-1      | ELK1    | 0.331426  | 4 |
| V\$AP2REP_01   | AP-2rep    | KLF12   | 0.250664  | 4 |
| V\$AML1_01     | AML1a      | RUNX1   | 0.278907  | 4 |
| V\$GATA1_05    | GATA-1     | GATA1   | 0.475532  | 4 |
| V\$GATA1_06    | GATA-1     | GATA1   | 0.475532  | 4 |
| V\$Elf5_03     | ELF5       | ELF5    | 0.206314  | 4 |
| V\$GATA2_02    | GATA-2     | GATA2   | 0.0627379 | 4 |
| V\$CDX2_Q5_02  | CDX-2      | CDX2    | 0.187121  | 4 |

|               |           |         |           |   |
|---------------|-----------|---------|-----------|---|
| V\$GATA6_01   | GATA-6    | GATA6   | 0.179109  | 4 |
| V\$HOXB8_01   | HOXB8     | HOXB8   | 0.487216  | 4 |
| V\$TEL1_02    | TEL1      | ETV6    | 0.202309  | 4 |
| V\$IPF1_Q6    | IPF1      | PDX1    | 0.350797  | 3 |
| V\$AML2_01    | AML2      | RUNX3   | 0.0752658 | 3 |
| V\$NCX_02     | Ncx       | TLX2    | 0.179059  | 3 |
| V\$HOX13_02   | HOXA5     | HOXA5   | 0.212458  | 3 |
| V\$NKX22_02   | NKX2B     | NKX2-2  | 0.0441284 | 3 |
| V\$IRF7_Q3    | IRF-7     | IRF7    | 0.0552326 | 3 |
| V\$NURR1_Q3   | NURR1     | NR4A2   | 0.352283  | 3 |
| V\$GATA2_01   | GATA-2    | GATA2   | 0.0627379 | 3 |
| V\$DAX1_01    | Dax1      | NR0B1   | 0.184728  | 3 |
| V\$NKX2B_Q3   | NKX2B     | NKX2-2  | 0.0441284 | 3 |
| V\$FAC1_01    | FAC1      | BPTF    | 0.118777  | 3 |
| V\$BCL6_Q3_01 | Bcl-6     | BCL6    | 0.196284  | 3 |
| V\$SREBP1_Q6  | SREBP-1   | SREBF1  | 0.130259  | 3 |
| V\$HNF6_Q6    | HNF6      | ONECUT1 | 0.222769  | 3 |
| V\$IPF1_Q4_01 | IPF1      | PDX1    | 0.350797  | 3 |
| V\$CMAF_01    | c-Maf     | MAF     | 0.44562   | 3 |
| V\$LHX3b_01   | LHX3b     | LHX3    | 0.353531  | 3 |
| V\$FOXO3A_Q1  | FOXO3A    | FOXO3   | 0.153395  | 3 |
| V\$GFI1_Q6_01 | Gfi1      | GFI1    | 0.130711  | 2 |
| V\$ATF1_Q6_01 | ATF-1     | ATF1    | 0.489274  | 2 |
| V\$HOXD9_Q2   | Hoxd9     | HOXD9   | 0.426109  | 2 |
| V\$TCF4_Q5_01 | TCF-4     | TCF7L2  | 0.167176  | 2 |
| V\$CREM_Q6    | CREM      | CREM    | 0.215295  | 2 |
| V\$PBX1_Q3    | Pbx1      | PBX1    | 0.387493  | 2 |
| V\$AP4_Q6_02  | AP-4      | TFAP4   | 0.479309  | 2 |
| V\$STAT4_Q5   | STAT4     | STAT4   | 0.197478  | 2 |
| V\$CDX2_Q5_01 | Cdx-2     | CDX2    | 0.187121  | 2 |
| V\$NANOG_Q2   | Nanog     | NANOG   | 0.281388  | 2 |
| V\$IPF1_Q3    | IPF1      | PDX1    | 0.350797  | 2 |
| V\$SOX10_Q6   | SOX10     | SOX10   | 0.16417   | 2 |
| V\$GFI1_Q6    | Gfi1      | GFI1    | 0.130711  | 2 |
| V\$YY1_Q6_02  | YY1       | YY1     | 0.396304  | 2 |
| V\$GR_01      | GR        | NR3C1   | 0.38144   | 2 |
| V\$USF2_Q6    | USF2      | USF2    | 0.486612  | 2 |
| V\$ARNT_Q2    | Arnt      | ARNT    | 0.193224  | 2 |
| V\$FOXJ2_Q1   | FOXJ2     | FOXJ2   | 0.295646  | 2 |
| V\$MAX_Q1     | Max       | MAX     | 0.444138  | 2 |
| V\$CMYB_Q1    | c-Myb     | MYB     | 0.064287  | 2 |
| V\$IPF1_Q6    | ipf1      | PDX1    | 0.350797  | 2 |
| V\$HNF1B_Q1   | HNF-1beta | HNF1B   | 0.307825  | 2 |
| V\$CDX2_Q1    | Cdx-2     | CDX2    | 0.187121  | 2 |
| V\$CART1_Q2   | CART1     | ALX1    | 0.300124  | 2 |
| V\$NKX32_Q2   | Nkx3-2    | NKX3-2  | 0.21476   | 2 |

|              |         |               |           |   |
|--------------|---------|---------------|-----------|---|
| V\$IRF7_01   | IRF-7   | IRF7          | 0.0552326 | 1 |
| V\$LHX3_01   | Lhx3    | LHX3          | 0.353531  | 1 |
| V\$POU6F1_01 | POU6F1  | POU6F1        | 0.407496  | 1 |
| V\$SREBP1_01 | SREBP-1 | SREBF1        | 0.130259  | 1 |
| V\$HSF1_01   | HSF1    | HSF1          | 0.431774  | 1 |
| V\$PAX8_01   | Pax-8   | PAX8          | 0.714106  | 1 |
| V\$CDP_04    | CDP     | CUX1          | 0.328374  | 1 |
| V\$CDX1_01   | Cdx-1   | CDX1          | 0.0207746 | 1 |
| V\$GFI1B_01  | Gfi1b   | GFI1B         | 0.273257  | 1 |
| V\$DEC2_Q2   |         | 2-Dec BHLHE41 | 0.403748  | 1 |
| V\$HOXA9_01  | hoxa9   | HOXA9         | 0.354511  | 1 |
| V\$ATF2_Q5   | ATF-2   | ATF2          | 0.386045  | 1 |
| V\$ATF4_Q6   | ATF-4   | ATF4          | 0.0610864 | 1 |
| V\$SOX2_Q6   | SOX2    | SOX2          | 0.179148  | 1 |
| V\$EVI1_06   | Evi-1   | MECOM         | 0.285835  | 1 |

hsa-let-7i

| Matrix_id      | transcription factor | Gene   | PCC       | Occurrence |
|----------------|----------------------|--------|-----------|------------|
| V\$PUR1_Q4     | PUR1                 | PURA   | 0.0633072 | 45         |
| V\$SMAD4_Q6_01 | Smad4                | SMAD4  | 0.0879548 | 44         |
| V\$ELF1_Q6     | Elf-1                | ELF1   | 0.247528  | 43         |
| V\$ZIC3_01     | Zic3                 | ZIC3   | 0.0529918 | 42         |
| V\$GKLF_Q4     | GKLF                 | KLF4   | 0.112727  | 42         |
| V\$GATA1_01    | GATA-1               | GATA1  | 0.0640399 | 42         |
| V\$SMAD3_Q6_01 | Smad3                | SMAD3  | 0.0226512 | 41         |
| V\$SOX9_Q4     | SOX9                 | SOX9   | 0.0735218 | 41         |
| V\$GR_Q6       | GR                   | NR3C1  | 0.12375   | 38         |
| V\$GATA1_02    | GATA-1               | GATA1  | 0.0640399 | 35         |
| V\$TTF1_Q5     | TTF-1                | NKX2-1 | 0.716708  | 35         |
| V\$SOX9_B1     | SOX9                 | SOX9   | 0.0735218 | 33         |
| V\$Elf5_03     | ELF5                 | ELF5   | 0.061747  | 33         |
| V\$AP4_Q6_02   | AP-4                 | TFAP4  | 0.19314   | 33         |
| V\$YY1_01      | YY1                  | YY1    | 0.376342  | 33         |
| V\$GATA1_06    | GATA-1               | GATA1  | 0.0640399 | 32         |
| V\$GATA1_05    | GATA-1               | GATA1  | 0.0640399 | 32         |
| V\$GABPA_Q4    | GABP-alpha           | GABPA  | 0.0737584 | 31         |
| V\$SPI1_Q5     | SPI1                 | SPI1   | 0.0276628 | 30         |
| V\$GATA1_04    | GATA-1               | GATA1  | 0.0640399 | 29         |
| V\$PBX1_04     | Pbx1                 | PBX1   | 0.385119  | 29         |
| V\$YY1_Q6_03   | YY1                  | YY1    | 0.376342  | 26         |
| V\$AP4_Q5      | AP-4                 | TFAP4  | 0.19314   | 24         |
| V\$ZBP89_Q4    | ZBP89                | ZNF148 | 0.147627  | 24         |

|              |         |        |           |    |
|--------------|---------|--------|-----------|----|
| V\$TCF3_01   | TCF-3   | TCF7L1 | 0.0502226 | 24 |
| V\$TCF4_Q5   | TCF-4   | TCF7L2 | 0.349534  | 23 |
| V\$HBP1_Q2   | hbp1    | HBP1   | 0.0161133 | 22 |
| V\$TCF4_01   | TCF-4   | TCF7L2 | 0.349534  | 21 |
| V\$SREBP1_Q6 | SREBP-1 | SREBF1 | 0.0459608 | 20 |
| V\$MSX1_01   | Msx-1   | MSX1   | 0.0771198 | 20 |
| V\$AP4_Q6    | AP-4    | TFAP4  | 0.19314   | 20 |
| V\$SMAD3_Q6  | SMAD3   | SMAD3  | 0.0226512 | 19 |
| V\$GR_01     | GR      | NR3C1  | 0.12375   | 19 |
| V\$MEF2A_Q6  | mef2A   | MEF2A  | 0.243245  | 17 |
| V\$AP4_Q6_01 | AP-4    | TFAP4  | 0.19314   | 15 |
| V\$DBP_Q6_01 | DBP     | DBP    | 0.257961  | 13 |
| V\$STAT1_05  | STAT1   | STAT1  | 0.272389  | 11 |
| V\$HOXB8_01  | HOXB8   | HOXB8  | 0.0457218 | 11 |
| V\$HOX13_02  | HOXA5   | HOXA5  | 0.0135114 | 11 |
| V\$HSF1_01   | HSF1    | HSF1   | 0.0269921 | 10 |
| V\$AMEF2_Q6  | aMEF-2  | MEF2A  | 0.243245  | 7  |
| V\$GRE_C     | GR      | NR3C1  | 0.12375   | 4  |
| V\$MEF2A_Q5  | MEF2A   | MEF2A  | 0.243245  | 1  |

hsa-mir-101-1

| Matrix_id      | transcription factor | Gene   | PCC       | Occurrence |
|----------------|----------------------|--------|-----------|------------|
| V\$PEA3_Q6     | PEA3                 | ETV4   | 0.682685  | 9          |
| V\$PARP_Q4     | PARP                 | PARP1  | 0.127428  | 9          |
| V\$P300_01     | p300                 | EP300  | 0.50372   | 9          |
| V\$PUR1_Q4     | PUR1                 | PURA   | 0.393818  | 9          |
| V\$SMAD3_Q6_01 | Smad3                | SMAD3  | 0.603115  | 9          |
| V\$SMAD4_Q6_01 | Smad4                | SMAD4  | 0.54774   | 9          |
| V\$IK_Q5       | Ikaros               | IKZF1  | 0.413263  | 8          |
| V\$CDX2_Q5_01  | Cdx-2                | CDX2   | 0.574546  | 8          |
| V\$CDX2_Q5_02  | CDX-2                | CDX2   | 0.574546  | 8          |
| V\$ETS2_B      | c-Ets-2              | ETS2   | 0.608624  | 8          |
| V\$CDX2_01     | Cdx-2                | CDX2   | 0.574546  | 8          |
| V\$DLX5_01     | dlx5                 | DLX5   | 0.152369  | 8          |
| V\$GKLF_Q4     | GKLF                 | KLF4   | 0.163624  | 8          |
| V\$AP4_Q6_02   | AP-4                 | TFAP4  | 0.452837  | 8          |
| V\$IPF1_Q4_01  | IPF1                 | PDX1   | 0.561481  | 8          |
| V\$SP1_01      | Sp1                  | SP1    | 0.476443  | 8          |
| V\$MEF2C_Q4    | MEF-2C               | MEF2C  | 0.0200641 | 8          |
| V\$HNF4A_Q6_01 | HNF-4alpha           | HNF4A  | 0.0355781 | 8          |
| V\$GATA1_01    | GATA-1               | GATA1  | 0.129136  | 8          |
| V\$NKX32_01    | Nkx3-2               | NKX3-2 | 0.474029  | 8          |

|               |            |        |           |   |
|---------------|------------|--------|-----------|---|
| V\$IPF1_Q6    | IPF1       | PDX1   | 0.561481  | 8 |
| V\$MYOD_Q6_01 | MyoD       | MYOD1  | 0.495647  | 7 |
| V\$E2A_Q6     | E2A        | TCF3   | 0.400686  | 7 |
| V\$TBX5_02    | TBX5       | TBX5   | 0.408121  | 7 |
| V\$SOX9_Q4    | SOX9       | SOX9   | 0.0399767 | 7 |
| V\$PBX1_04    | Pbx1       | PBX1   | 0.13064   | 7 |
| V\$AML2_01    | AML2       | RUNX3  | 0.234858  | 7 |
| V\$CREM_Q6    | CREM       | CREM   | 0.0940004 | 7 |
| V\$CMYB_Q5    | c-Myb      | MYB    | 0.0250382 | 7 |
| V\$ATF1_Q6_01 | ATF-1      | ATF1   | 0.418742  | 7 |
| V\$IRF4_Q6    | IRF-4      | IRF4   | 0.586713  | 7 |
| V\$NFAT4_Q3   | NF-AT4     | NFATC3 | 0.257489  | 7 |
| V\$HNF3B_Q6   | HNF-3beta  | FOXA2  | 0.248369  | 7 |
| V\$AHR_Q5     | AhR        | AHR    | 0.0480466 | 7 |
| V\$E12_Q6     | E12        | TCF3   | 0.400686  | 7 |
| V\$GR_Q6      | GR         | NR3C1  | 0.564865  | 7 |
| V\$MYB_Q6     | c-Myb      | MYB    | 0.0250382 | 7 |
| V\$NR1B2_Q6   | NR1B2      | RARB   | 0.476286  | 7 |
| V\$YY1_01     | YY1        | YY1    | 0.172724  | 7 |
| V\$GATA1_04   | GATA-1     | GATA1  | 0.129136  | 7 |
| V\$GATA1_02   | GATA-1     | GATA1  | 0.129136  | 7 |
| V\$AP2REP_01  | AP-2rep    | KLF12  | 0.450204  | 7 |
| V\$E47_02     | E47        | TCF3   | 0.400686  | 7 |
| V\$SOX9_B1    | SOX9       | SOX9   | 0.0399767 | 7 |
| V\$GATA2_02   | GATA-2     | GATA2  | 0.431424  | 7 |
| V\$GATA1_06   | GATA-1     | GATA1  | 0.129136  | 7 |
| V\$SOX5_01    | SOX5       | SOX5   | 0.147394  | 7 |
| V\$GATA1_05   | GATA-1     | GATA1  | 0.129136  | 7 |
| V\$ARNT_01    | Arnt       | ARNT   | 0.548269  | 6 |
| V\$FOXP3_01   | FOXP3      | FOXP3  | 0.535235  | 6 |
| V\$PARP_Q3    | PARP       | PARP1  | 0.127428  | 6 |
| V\$HBP1_Q2    | hbp1       | HBP1   | 0.523956  | 6 |
| V\$IPF1_01    | IPF1       | PDX1   | 0.561481  | 6 |
| V\$NFAT2_Q5   | NF-AT2     | NFATC1 | 0.56407   | 6 |
| V\$NANOG_02   | Nanog      | NANOG  | 0.695304  | 6 |
| V\$HIF1A_Q6   | HIF-1alpha | HIF1A  | 0.132218  | 6 |
| V\$PBX1_Q3    | Pbx1       | PBX1   | 0.13064   | 6 |
| V\$ERBETA_Q5  | ER-beta    | ESR2   | 0.381705  | 6 |
| V\$TBX5_01    | TBX5       | TBX5   | 0.408121  | 6 |
| V\$YY1_Q6_03  | YY1        | YY1    | 0.172724  | 6 |
| V\$GFI1B_01   | Gfi1b      | GFI1B  | 0.409807  | 6 |
| V\$SRY_02     | SRY        | SRY    | 0.546578  | 6 |
| V\$FOXO3A_Q1  | FOXO3A     | FOXO3  | 0.633824  | 6 |
| V\$MYOD_01    | MyoD       | MYOD1  | 0.495647  | 5 |
| V\$AML1_Q4    | AML1       | RUNX1  | 0.469438  | 5 |
| V\$TEF1_Q6_03 | TEF-1      | TEAD1  | 0.616313  | 5 |



|                   |          |         |           |   |
|-------------------|----------|---------|-----------|---|
| V\$GFI1_Q6_01     | Gfi1     | GFI1    | 0.090633  | 5 |
| V\$TCF4_01        | TCF-4    | TCF7L2  | 0.189508  | 5 |
| V\$CRX_Q4_01      | CRX      | CRX     | 0.441681  | 5 |
| V\$AP4_Q5         | AP-4     | TFAP4   | 0.452837  | 5 |
| V\$PITX3_Q2       | PITX3    | PITX3   | 0.403807  | 5 |
| V\$AML1_01        | AML1a    | RUNX1   | 0.469438  | 5 |
| V\$KAISO_01       | KAISO    | ZBTB33  | 0.639948  | 5 |
| V\$GR_01          | GR       | NR3C1   | 0.564865  | 5 |
| V\$HNF3A_01       | HNF3A    | FOXA1   | 0.528814  | 5 |
| V\$GFI1_Q6        | Gfi1     | GFI1    | 0.090633  | 5 |
| V\$MSX1_01        | Msx-1    | MSX1    | 0.465542  | 5 |
| V\$HOXA9_01       | hoxa9    | HOXA9   | 0.616064  | 5 |
| V\$TCF4_Q5        | TCF-4    | TCF7L2  | 0.189508  | 5 |
| V\$AML1_Q6        | AML1     | RUNX1   | 0.469438  | 5 |
| V\$CMAF_01        | c-Maf    | MAF     | 0.258982  | 5 |
| V\$PAX8_01        | Pax-8    | PAX8    | 0.0585053 | 5 |
| V\$ELF5_01        | ELF5     | ELF5    | 0.370192  | 5 |
| V\$LRF_Q2         | LRF      | ZBTB7A  | 0.454155  | 4 |
| V\$FOXO4_02       | FOXO4    | FOXO4   | 0.0949138 | 4 |
| V\$PITX2_Q2       | Pitx2    | PITX2   | 0.661672  | 4 |
| V\$TTF1_Q5        | TTF-1    | NKX2-1  | 0.108288  | 4 |
| V\$MYOGENIN_Q6_01 | myogenin | MYOG    | 0.544144  | 4 |
| V\$ZFX_01         | Zfx      | ZFX     | 0.709511  | 4 |
| V\$TEF1_Q6        | TEF-1    | TEAD1   | 0.616313  | 4 |
| V\$AP4_Q6         | AP-4     | TFAP4   | 0.452837  | 4 |
| V\$SMAD3_Q6       | SMAD3    | SMAD3   | 0.603115  | 4 |
| V\$FOXJ2_01       | FOXJ2    | FOXJ2   | 0.516915  | 4 |
| V\$TCF3_01        | TCF-3    | TCF7L1  | 0.403167  | 4 |
| V\$MATH1_Q2       | MATH1    | ATOH1   | 0.384249  | 3 |
| V\$PITX2_01       | PITX2    | PITX2   | 0.661672  | 3 |
| V\$HNF6_Q6        | HNF6     | ONECUT1 | 0.183798  | 3 |
| V\$CRX_Q4         | Crx      | CRX     | 0.441681  | 3 |
| V\$CRX_02         | Crx      | CRX     | 0.441681  | 3 |
| V\$NKX32_02       | Nkx3-2   | NKX3-2  | 0.474029  | 3 |
| V\$IPF1_02        | IPF1     | PDX1    | 0.561481  | 3 |
| V\$PITX1_01       | Pitx1    | PITX1   | 0.662468  | 3 |
| V\$RFX1_02        | RFX1     | RFX1    | 0.611434  | 2 |
| V\$BCL6_Q3_01     | Bcl-6    | BCL6    | 0.639601  | 2 |
| V\$AP4_01         | AP-4     | TFAP4   | 0.452837  | 2 |
| V\$MEF2A_Q6       | mef2A    | MEF2A   | 0.0245837 | 2 |
| V\$ERR1_Q3        | ERR1     | ESRRA   | 0.393265  | 2 |
| V\$IRF2_01        | IRF-2    | IRF2    | 0.0779576 | 2 |
| V\$AIRE_01        | AIRE     | AIRE    | 0.122894  | 2 |
| V\$SOX10_Q6       | SOX10    | SOX10   | 0.0945659 | 2 |
| V\$IRF1_01        | IRF-1    | IRF1    | 0.483882  | 1 |

---

hsa-mir-101-2

| Matrix_id      | transcription factor | Gene     | PCC       | Occurrence |
|----------------|----------------------|----------|-----------|------------|
| V\$Elf5_Q3     | ELF5                 | ELF5     | 0.370192  | 9          |
| V\$BEN_Q1      | BEN                  | GTF2IRD1 | 0.622735  | 9          |
| V\$PARP_Q4     | PARP                 | PARP1    | 0.127428  | 9          |
| V\$SMAD4_Q6_Q1 | Smad4                | SMAD4    | 0.54774   | 9          |
| V\$PEA3_Q6     | PEA3                 | ETV4     | 0.682685  | 9          |
| V\$PUR1_Q4     | PUR1                 | PURA     | 0.393818  | 9          |
| V\$P300_Q1     | p300                 | EP300    | 0.50372   | 9          |
| V\$SMAD3_Q6_Q1 | Smad3                | SMAD3    | 0.603115  | 9          |
| V\$IPF1_Q4     | IPF1                 | PDX1     | 0.561481  | 8          |
| V\$MEF2C_Q4    | MEF-2C               | MEF2C    | 0.0200641 | 8          |
| V\$HNF4A_Q6_Q1 | HNF-4alpha           | HNF4A    | 0.0355781 | 8          |
| V\$YY1_Q6      | YY1                  | YY1      | 0.172724  | 8          |
| V\$AP4_Q6_Q2   | AP-4                 | TFAP4    | 0.452837  | 8          |
| V\$IPF1_Q4_Q1  | IPF1                 | PDX1     | 0.561481  | 8          |
| V\$GABPA_Q4    | GABP-alpha           | GABPA    | 0.0553642 | 8          |
| V\$YY1_Q6_Q2   | YY1                  | YY1      | 0.172724  | 8          |
| V\$GKLF_Q4     | GKLF                 | KLF4     | 0.163624  | 8          |
| V\$IK_Q5       | Ikaros               | IKZF1    | 0.413263  | 8          |
| V\$NKX32_Q1    | Nkx3-2               | NKX3-2   | 0.474029  | 8          |
| V\$CDX2_Q5_Q1  | Cdx-2                | CDX2     | 0.574546  | 8          |
| V\$CDX2_Q1     | Cdx-2                | CDX2     | 0.574546  | 8          |
| V\$IPF1_Q6     | IPF1                 | PDX1     | 0.561481  | 8          |
| V\$GATA1_Q1    | GATA-1               | GATA1    | 0.129136  | 8          |
| V\$CDX2_Q5_Q2  | CDX-2                | CDX2     | 0.574546  | 8          |
| V\$SP1_Q6      | Sp1                  | SP1      | 0.476443  | 8          |
| V\$ELK1_Q2     | Elk-1                | ELK1     | 0.325443  | 8          |
| V\$SP1_Q1      | Sp1                  | SP1      | 0.476443  | 8          |
| V\$TEL1_Q2     | TEL1                 | ETV6     | 0.595503  | 8          |
| V\$TBX5_Q2     | TBX5                 | TBX5     | 0.408121  | 7          |
| V\$GATA1_Q4    | GATA-1               | GATA1    | 0.129136  | 7          |
| V\$GATA1_Q2    | GATA-1               | GATA1    | 0.129136  | 7          |
| V\$ETV7_Q1     | ETV7                 | ETV7     | 0.581358  | 7          |
| V\$CMYB_Q5     | c-Myb                | MYB      | 0.0250382 | 7          |
| V\$ELK1_Q6     | ELK-1                | ELK1     | 0.325443  | 7          |
| V\$CREM_Q6     | CREM                 | CREM     | 0.0940004 | 7          |
| V\$ESE1_Q3     | ESE-1                | ELF3     | 0.539295  | 7          |
| V\$SPI1_Q3     | SPI1                 | SPI1     | 0.065947  | 7          |
| V\$YY1_Q1      | YY1                  | YY1      | 0.172724  | 7          |
| V\$SOX9_Q4     | SOX9                 | SOX9     | 0.0399767 | 7          |
| V\$MYB_Q6      | c-Myb                | MYB      | 0.0250382 | 7          |

|               |            |         |           |   |
|---------------|------------|---------|-----------|---|
| V\$ATF1_Q6_01 | ATF-1      | ATF1    | 0.418742  | 7 |
| V\$IRF4_Q6    | IRF-4      | IRF4    | 0.586713  | 7 |
| V\$GATA2_02   | GATA-2     | GATA2   | 0.431424  | 7 |
| V\$GATA1_06   | GATA-1     | GATA1   | 0.129136  | 7 |
| V\$EHF_03     | EHF        | EHF     | 0.529766  | 7 |
| V\$AP2REP_01  | AP-2rep    | KLF12   | 0.450204  | 7 |
| V\$GATA1_05   | GATA-1     | GATA1   | 0.129136  | 7 |
| V\$ER71_02    | ER71       | ETV2    | 0.267502  | 7 |
| V\$ETV3_02    | ETV3       | ETV3    | 0.163675  | 7 |
| V\$NFAT4_Q3   | NF-AT4     | NFATC3  | 0.257489  | 7 |
| V\$OC2_Q3     | OC-2       | ONECUT2 | 0.336029  | 7 |
| V\$AHR_Q5     | AhR        | AHR     | 0.0480466 | 7 |
| V\$PBX1_04    | Pbx1       | PBX1    | 0.13064   | 7 |
| V\$WT1_Q6_01  | WT1        | WT1     | 0.177647  | 6 |
| V\$ARNT_01    | Arnt       | ARNT    | 0.548269  | 6 |
| V\$PBX1_Q3    | Pbx1       | PBX1    | 0.13064   | 6 |
| V\$HIF1A_Q6   | HIF-1alpha | HIF1A   | 0.132218  | 6 |
| V\$ESE1_02    | ESE-1      | ELF3    | 0.539295  | 6 |
| V\$ERG_03     | ERG        | ERG     | 0.550102  | 6 |
| V\$HBP1_Q2    | hbp1       | HBP1    | 0.523956  | 6 |
| V\$TBX5_01    | TBX5       | TBX5    | 0.408121  | 6 |
| V\$PARP_Q3    | PARP       | PARP1   | 0.127428  | 6 |
| V\$SP1_Q6_01  | Sp1        | SP1     | 0.476443  | 6 |
| V\$SP1_Q2_01  | Sp1        | SP1     | 0.476443  | 6 |
| V\$SP1_Q4_01  | Sp1        | SP1     | 0.476443  | 6 |
| V\$GATA2_01   | GATA-2     | GATA2   | 0.431424  | 6 |
| V\$NANOG_02   | Nanog      | NANOG   | 0.695304  | 6 |
| V\$YY1_02     | YY1        | YY1     | 0.172724  | 5 |
| V\$AML1_Q6    | AML1       | RUNX1   | 0.469438  | 5 |
| V\$RFX1_01    | RFX1       | RFX1    | 0.611434  | 5 |
| V\$PET1_02    | Pet-1      | FEV     | 0.507372  | 5 |
| V\$KAISO_01   | KAISO      | ZBTB33  | 0.639948  | 5 |
| V\$CP2_01     | CP2        | TFCP2   | 0.142877  | 5 |
| V\$TEF1_Q6_03 | TEF-1      | TEAD1   | 0.616313  | 5 |
| V\$PITX3_Q2   | PITX3      | PITX3   | 0.403807  | 5 |
| V\$SP1_02     | SP1        | SP1     | 0.476443  | 5 |
| V\$CRX_Q4_01  | CRX        | CRX     | 0.441681  | 5 |
| V\$HOXA9_01   | hoxa9      | HOXA9   | 0.616064  | 5 |
| V\$TCF3_01    | TCF-3      | TCF7L1  | 0.403167  | 4 |
| V\$PDEF_02    | PDEF       | SPDEF   | 0.290548  | 4 |
| V\$HNF1_02    | HNF-1alpha | HNF1A   | 0.397431  | 4 |
| V\$TEF1_Q6    | TEF-1      | TEAD1   | 0.616313  | 4 |
| V\$ERG_01     | ERG        | ERG     | 0.550102  | 4 |
| V\$PITX2_Q2   | Pitx2      | PITX2   | 0.661672  | 4 |
| V\$E2F1_Q3    | E2F-1      | E2F1    | 0.148693  | 4 |
| V\$GATA2_03   | GATA-2     | GATA2   | 0.431424  | 4 |

|                |           |        |           |   |
|----------------|-----------|--------|-----------|---|
| V\$STAF_02     | Staf      | ZNF143 | 0.607874  | 4 |
| V\$E2F1_Q3_01  | E2F-1     | E2F1   | 0.148693  | 4 |
| V\$SP4_Q5      | SP4       | SP4    | 0.628221  | 4 |
| V\$CNOT3_01    | CNOT3     | CNOT3  | 0.383166  | 4 |
| V\$AP2BETA_Q3  | AP-2beta  | TFAP2B | 0.591809  | 4 |
| V\$LRF_Q2      | LRF       | ZBTB7A | 0.454155  | 4 |
| V\$NURR1_Q3    | NURR1     | NR4A2  | 0.37923   | 4 |
| V\$GABPBETA_Q3 | GABP-beta | GABPB1 | 0.436995  | 4 |
| V\$E2F1_Q6     | E2F-1     | E2F1   | 0.148693  | 3 |
| V\$CEBPB_02    | C/EBPbeta | CEBPB  | 0.182821  | 3 |
| V\$AML2_Q3     | AML2      | RUNX3  | 0.234858  | 3 |
| V\$CRX_Q2      | Crx       | CRX    | 0.441681  | 3 |
| V\$ZBP89_Q4    | ZBP89     | ZNF148 | 0.61102   | 3 |
| V\$PITX2_01    | PITX2     | PITX2  | 0.661672  | 3 |
| V\$FAC1_01     | FAC1      | BPTF   | 0.275689  | 3 |
| V\$DBP_Q6_01   | DBP       | DBP    | 0.381441  | 3 |
| V\$CRX_Q4      | Crx       | CRX    | 0.441681  | 3 |
| V\$AML2_Q3_01  | AML2      | RUNX3  | 0.234858  | 3 |
| V\$CIZ_01      | CIZ       | ZNF384 | 0.23869   | 3 |
| V\$E2F1_Q6_01  | E2F-1     | E2F1   | 0.148693  | 3 |
| V\$PITX1_01    | Pitx1     | PITX1  | 0.662468  | 3 |
| V\$RFX1_Q2     | RFX1      | RFX1   | 0.611434  | 2 |
| V\$IRF1_Q6_01  | IRF-1     | IRF1   | 0.483882  | 2 |
| V\$HNF1B_01    | HNF-1beta | HNF1B  | 0.3637    | 1 |
| V\$IRF1_Q6     | IRF-1     | IRF1   | 0.483882  | 1 |
| V\$WT1_Q6      | WT1       | WT1    | 0.177647  | 1 |
| V\$AHR_Q1      | AhR       | AHR    | 0.0480466 | 1 |

hsa-mir-103a-1

| Matrix_id   | transcription factor | Gene  | PCC       | Occurrence |
|-------------|----------------------|-------|-----------|------------|
| V\$MAFB_01  | MAFB                 | MAFB  | 0.339311  | 3          |
| V\$ELF1_Q6  | Elf-1                | ELF1  | 0.0079201 | 3          |
| V\$AHR_Q5   | AhR                  | AHR   | 0.352312  | 3          |
| V\$GATA6_01 | GATA-6               | GATA6 | 0.251442  | 3          |
| V\$SOX9_B1  | SOX9                 | SOX9  | 0.0280758 | 3          |
| V\$GATA3_Q2 | GATA-3               | GATA3 | 0.416383  | 3          |
| V\$GATA2_Q2 | GATA-2               | GATA2 | 0.146062  | 3          |
| V\$DLX5_Q1  | dlx5                 | DLX5  | 0.209698  | 3          |
| V\$TBP_Q6   | TBP                  | TBP   | 0.107054  | 3          |
| V\$PARP_Q4  | PARP                 | PARP1 | 0.208507  | 3          |
| V\$SPI1_Q3  | SPI1                 | SPI1  | 0.0141189 | 3          |
| V\$HOX13_Q2 | HOXA5                | HOXA5 | 0.262718  | 2          |

|                |            |        |           |   |
|----------------|------------|--------|-----------|---|
| V\$POU6F1_Q3   | POU6F1     | POU6F1 | 0.102675  | 2 |
| V\$CEBPE_Q6    | CEBPE      | CEBPE  | 0.0731097 | 2 |
| V\$STAT5A_Q6   | STAT5A     | STAT5A | 0.192008  | 2 |
| V\$CEBPB_Q6    | C/EBPbeta  | CEBPB  | 0.257561  | 2 |
| V\$MEF2C_Q4    | MEF-2C     | MEF2C  | 0.25504   | 2 |
| V\$NKX2B_Q3    | NKX2B      | NKX2-2 | 0.352958  | 2 |
| V\$PARP_Q3     | PARP       | PARP1  | 0.208507  | 2 |
| V\$GATA2_Q1    | GATA-2     | GATA2  | 0.146062  | 2 |
| V\$GATA3_Q1    | GATA-3     | GATA3  | 0.416383  | 2 |
| V\$CEBPB_Q2    | C/EBPbeta  | CEBPB  | 0.257561  | 2 |
| V\$CEBPB_Q1    | C/EBPbeta  | CEBPB  | 0.257561  | 1 |
| V\$MEF2A_Q6    | mef2A      | MEF2A  | 0.119907  | 1 |
| V\$POU6F1_Q1   | POU6F1     | POU6F1 | 0.102675  | 1 |
| V\$CEBPG_Q6_Q1 | C/EBPgamma | CEBPG  | 0.298742  | 1 |
| V\$FOXO4_Q1    | FOXO4      | FOXO4  | 0.414082  | 1 |
| V\$SATB1_Q3    | SATB1      | SATB1  | 0.0758978 | 1 |
| V\$HMGY1_Q1    | HMGY1      | HMGY1  | 0.102285  | 1 |
| V\$FOXO4_Q2    | FOXO4      | FOXO4  | 0.414082  | 1 |
| V\$POU6F1_Q2   | POU6F1     | POU6F1 | 0.102675  | 1 |
| V\$CEBPD_Q6    | C/EBPdelta | CEBPD  | 0.158856  | 1 |
| V\$PIT1_Q6     | Pit-1      | POU1F1 | 0.06035   | 1 |
| V\$NKX22_Q2    | NKX2B      | NKX2-2 | 0.352958  | 1 |
| V\$CDP_Q4      | CDP        | CUX1   | 0.177681  | 1 |
| V\$YY1_Q1      | YY1        | YY1    | 0.162605  | 1 |

hsa-mir-103a-2

| Matrix_id   | transcription factor | Gene  | PCC        | Occurrence |
|-------------|----------------------|-------|------------|------------|
| V\$ELK1_Q2  | Elk-1                | ELK1  | 0.0703832  | 3          |
| V\$SOX9_Q4  | SOX9                 | SOX9  | 0.0280758  | 3          |
| V\$SPI1_Q3  | SPI1                 | SPI1  | 0.0141189  | 3          |
| V\$DLX5_Q1  | dlx5                 | DLX5  | 0.209698   | 3          |
| V\$GABPA_Q4 | GABP-alpha           | GABPA | 0.00877552 | 3          |
| V\$IRF8_Q6  | IRF-8                | IRF8  | 0.25653    | 3          |
| V\$PUR1_Q4  | PUR1                 | PURA  | 0.144841   | 3          |
| V\$GKLF_Q4  | GKLF                 | KLF4  | 0.189779   | 3          |
| V\$IRF7_Q3  | IRF-7                | IRF7  | 0.0451349  | 3          |
| V\$PARP_Q4  | PARP                 | PARP1 | 0.208507   | 3          |
| V\$ELK1_Q6  | ELK-1                | ELK1  | 0.0703832  | 3          |
| V\$MAFB_Q1  | MAFB                 | MAFB  | 0.339311   | 3          |
| V\$ELF1_Q6  | Elf-1                | ELF1  | 0.0079201  | 3          |
| V\$TBP_Q6   | TBP                  | TBP   | 0.107054   | 3          |
| V\$SOX9_Q1  | SOX9                 | SOX9  | 0.0280758  | 3          |

|                |            |        |           |   |
|----------------|------------|--------|-----------|---|
| V\$TFII_Q6     | TFII-I     | GTF2I  | 0.085451  | 3 |
| V\$AHR_Q5      | AhR        | AHR    | 0.352312  | 3 |
| V\$CEBPB_Q2    | C/EBPbeta  | CEBPB  | 0.257561  | 2 |
| V\$CEBPB_Q6    | C/EBPbeta  | CEBPB  | 0.257561  | 2 |
| V\$PARP_Q3     | PARP       | PARP1  | 0.208507  | 2 |
| V\$HIF1A_Q6    | HIF-1alpha | HIF1A  | 0.0294576 | 2 |
| V\$MEF2C_Q4    | MEF-2C     | MEF2C  | 0.25504   | 2 |
| V\$SPI1_Q5     | SPI1       | SPI1   | 0.0141189 | 2 |
| V\$AP2ALPHA_Q6 | AP-2alpha  | TFAP2A | 0.3199    | 2 |
| V\$YY1_Q6      | YY1        | YY1    | 0.162605  | 2 |
| V\$ING4_Q1     | ING4       | ING4   | 0.558481  | 2 |
| V\$HOX13_Q2    | HOXA5      | HOXA5  | 0.262718  | 2 |
| V\$ZABC1_Q1    | ZABC1      | ZNF217 | 0.176485  | 2 |
| V\$NURR1_Q3    | NURR1      | NR4A2  | 0.0300761 | 2 |
| V\$ERM_Q2      | Erm        | ETV5   | 0.51048   | 1 |
| V\$YY1_Q1      | YY1        | YY1    | 0.162605  | 1 |
| V\$CP2_Q1      | CP2        | TFCP2  | 0.414045  | 1 |
| V\$EGR2_Q1     | Egr-2      | EGR2   | 0.0647265 | 1 |
| V\$CEBPD_Q6    | C/EBPdelta | CEBPD  | 0.158856  | 1 |
| V\$CDP_Q4      | CDP        | CUX1   | 0.177681  | 1 |

hsa-mir-106a

| Matrix_id    | transcription factor | Gene   | PCC        | Occurrence |
|--------------|----------------------|--------|------------|------------|
| V\$ETS1_B    | c-Ets-1              | ETS1   | 0.155974   | 19         |
| V\$ELF1_Q6   | Elf-1                | ELF1   | 0.558313   | 19         |
| V\$PARP_Q4   | PARP                 | PARP1  | 0.0141356  | 19         |
| V\$NFAT4_Q3  | NF-AT4               | NFATC3 | 0.595036   | 19         |
| V\$IK_Q5     | Ikaros               | IKZF1  | 0.207224   | 18         |
| V\$TBP_Q6    | TBP                  | TBP    | 0.0966152  | 17         |
| V\$CETS1_Q6  | C-ets-1              | ETS1   | 0.155974   | 17         |
| V\$GABPA_Q4  | GABP-alpha           | GABPA  | 0.00840813 | 16         |
| V\$DLX5_Q1   | dlx5                 | DLX5   | 0.163376   | 15         |
| V\$YY1_Q1    | YY1                  | YY1    | 0.164824   | 15         |
| V\$IRF8_Q6   | IRF-8                | IRF8   | 0.165231   | 14         |
| V\$AHR_Q5    | AhR                  | AHR    | 0.207425   | 14         |
| V\$E2A_Q6    | E2A                  | TCF3   | 0.074395   | 13         |
| V\$HMG1Y_Q1  | HMG1Y                | HMGA1  | 0.708875   | 13         |
| V\$E12_Q6    | E12                  | TCF3   | 0.074395   | 13         |
| V\$GATA3_Q1  | GATA-3               | GATA3  | 0.496512   | 13         |
| V\$E47_Q2    | E47                  | TCF3   | 0.074395   | 13         |
| V\$YY1_Q6_Q2 | YY1                  | YY1    | 0.164824   | 12         |
| V\$GFI1_Q6   | Gfi1                 | GFI1   | 0.58291    | 12         |

|               |            |        |           |    |
|---------------|------------|--------|-----------|----|
| V\$YY1_Q6_03  | YY1        | YY1    | 0.164824  | 11 |
| V\$CMYB_01    | c-Myb      | MYB    | 0.651373  | 11 |
| V\$E2A_Q2     | E2A        | TCF3   | 0.074395  | 11 |
| V\$YY1_Q6     | YY1        | YY1    | 0.164824  | 11 |
| V\$ING4_01    | ING4       | ING4   | 0.237336  | 10 |
| V\$FOXO4_02   | FOXO4      | FOXO4  | 0.169378  | 10 |
| V\$GFI1_Q6_01 | Gfi1       | GFI1   | 0.58291   | 9  |
| V\$AML2_Q3    | AML2       | RUNX3  | 0.0768146 | 9  |
| V\$CEBPA_01   | C/EBPalpha | CEBPA  | 0.135586  | 9  |
| V\$GATA3_03   | GATA-3     | GATA3  | 0.496512  | 7  |
| V\$IRF7_Q3    | IRF-7      | IRF7   | 0.234445  | 7  |
| V\$STAT1_05   | STAT1      | STAT1  | 0.147706  | 7  |
| V\$ZABC1_01   | ZABC1      | ZNF217 | 0.444808  | 5  |
| V\$YY1_03     | YY1        | YY1    | 0.164824  | 4  |
| V\$CP2_01     | CP2        | TFCP2  | 0.11434   | 3  |
| V\$AHR_01     | AhR        | AHR    | 0.207425  | 2  |
| V\$STAT1_Q6   | STAT1      | STAT1  | 0.147706  | 2  |

hsa-mir-107

| Matrix_id      | transcription factor | Gene  | PCC       | Occurrence |
|----------------|----------------------|-------|-----------|------------|
| V\$PUR1_Q4     | PUR1                 | PURA  | 0.114982  | 37         |
| V\$MAFB_01     | MAFB                 | MAFB  | 0.321674  | 35         |
| V\$P300_01     | p300                 | EP300 | 0.0443999 | 34         |
| V\$PARP_Q4     | PARP                 | PARP1 | 0.179995  | 34         |
| V\$ELF1_Q6     | Elf-1                | ELF1  | 0.0532784 | 33         |
| V\$AP2REP_01   | AP-2rep              | KLF12 | 0.0668963 | 32         |
| V\$DLX5_01     | dlx5                 | DLX5  | 0.0791999 | 31         |
| V\$SMAD3_Q6_01 | Smad3                | SMAD3 | 0.058733  | 31         |
| V\$HNF4A_Q6_01 | HNF-4alpha           | HNF4A | 0.755797  | 30         |
| V\$Elf5_03     | ELF5                 | ELF5  | 0.127355  | 30         |
| V\$ETS1_B      | c-Ets-1              | ETS1  | 0.50589   | 28         |
| V\$CDX2_Q5_02  | CDX-2                | CDX2  | 0.121061  | 28         |
| V\$TBP_Q6      | TBP                  | TBP   | 0.085369  | 28         |
| V\$GABPA_Q4    | GABP-alpha           | GABPA | 0.419672  | 27         |
| V\$SOX5_01     | SOX5                 | SOX5  | 0.252095  | 27         |
| V\$CETS1_Q6    | C-ets-1              | ETS1  | 0.50589   | 27         |
| V\$MEF2C_Q4    | MEF-2C               | MEF2C | 0.154708  | 26         |
| V\$AP4_Q6_02   | AP-4                 | TFAP4 | 0.192697  | 26         |
| V\$TBX5_02     | TBX5                 | TBX5  | 0.221053  | 25         |
| V\$CDX2_01     | Cdx-2                | CDX2  | 0.121061  | 24         |
| V\$PARP_Q3     | PARP                 | PARP1 | 0.179995  | 24         |
| V\$SPI1_Q5     | SPI1                 | SPI1  | 0.116644  | 24         |

|               |            |         |           |    |
|---------------|------------|---------|-----------|----|
| V\$IPF1_Q4_01 | IPF1       | PDX1    | 0.110608  | 23 |
| V\$CDX2_Q5_01 | Cdx-2      | CDX2    | 0.121061  | 23 |
| V\$IPF1_Q6    | IPF1       | PDX1    | 0.110608  | 23 |
| V\$SPI1_03    | SPI1       | SPI1    | 0.116644  | 23 |
| V\$OC2_Q3     | OC-2       | ONECUT2 | 0.393874  | 22 |
| V\$CEBPE_Q6   | CEBPE      | CEBPE   | 0.519654  | 22 |
| V\$TCF3_01    | TCF-3      | TCF7L1  | 0.377132  | 22 |
| V\$AML1_Q6    | AML1       | RUNX1   | 0.0555668 | 22 |
| V\$GATA1_06   | GATA-1     | GATA1   | 0.215598  | 21 |
| V\$GATA6_01   | GATA-6     | GATA6   | 0.113392  | 21 |
| V\$GATA1_05   | GATA-1     | GATA1   | 0.215598  | 21 |
| V\$HNF3B_Q6   | HNF-3beta  | FOXA2   | 0.184636  | 20 |
| V\$LRF_Q2     | LRF        | ZBTB7A  | 0.315163  | 20 |
| V\$TBX5_01    | TBX5       | TBX5    | 0.221053  | 19 |
| V\$GATA3_02   | GATA-3     | GATA3   | 0.0871137 | 19 |
| V\$IRF4_Q6    | IRF-4      | IRF4    | 0.136451  | 19 |
| V\$GATA1_02   | GATA-1     | GATA1   | 0.215598  | 19 |
| V\$IPF1_Q4    | IPF1       | PDX1    | 0.110608  | 18 |
| V\$GATA1_04   | GATA-1     | GATA1   | 0.215598  | 17 |
| V\$TEF1_Q6    | TEF-1      | TEAD1   | 0.0676334 | 17 |
| V\$GFI1_Q6_01 | Gfi1       | GFI1    | 0.117638  | 17 |
| V\$FOXJ2_01   | FOXJ2      | FOXJ2   | 0.0151085 | 16 |
| V\$IRF7_Q3    | IRF-7      | IRF7    | 0.0225962 | 16 |
| V\$SOX10_Q6   | SOX10      | SOX10   | 0.230931  | 16 |
| V\$TEF1_Q6_03 | TEF-1      | TEAD1   | 0.0676334 | 16 |
| V\$GFI1_Q6    | Gfi1       | GFI1    | 0.117638  | 16 |
| V\$CMF1_Q6    | c-Maf      | MAF     | 0.419311  | 16 |
| V\$HNF6_Q6    | HNF6       | ONECUT1 | 0.340872  | 15 |
| V\$CEBPB_Q6   | C/EBPbeta  | CEBPB   | 0.045712  | 15 |
| V\$CREM_Q6    | CREM       | CREM    | 0.0494795 | 14 |
| V\$CEBPA_01   | C/EBPalpha | CEBPA   | 0.450553  | 14 |
| V\$CEBPA_Q6   | C/EBPalpha | CEBPA   | 0.450553  | 14 |
| V\$HOXA9_01   | hoxa9      | HOXA9   | 0.162973  | 14 |
| V\$FOXP3_01   | FOXP3      | FOXP3   | 0.132803  | 14 |
| V\$AML1_01    | AML1a      | RUNX1   | 0.0555668 | 13 |
| V\$GFI1B_01   | Gfi1b      | GFI1B   | 0.114454  | 13 |
| V\$CDX2_Q5    | Cdx-2      | CDX2    | 0.121061  | 13 |
| V\$CDX1_01    | Cdx-1      | CDX1    | 0.325199  | 13 |
| V\$FOXO4_02   | FOXO4      | FOXO4   | 0.0990171 | 13 |
| V\$AML1_Q4    | AML1       | RUNX1   | 0.0555668 | 12 |
| V\$GATA3_03   | GATA-3     | GATA3   | 0.0871137 | 12 |
| V\$CEBPB_01   | C/EBPbeta  | CEBPB   | 0.045712  | 10 |
| V\$ELF5_01    | ELF5       | ELF5    | 0.127355  | 10 |
| V\$EAR2_Q2    | EAR2       | NR2F6   | 0.466664  | 8  |
| V\$SOX2_Q6    | SOX2       | SOX2    | 0.502482  | 7  |
| V\$ELK1_01    | Elk-1      | ELK1    | 0.325609  | 6  |



|              |        |              |           |   |
|--------------|--------|--------------|-----------|---|
| V\$FOXJ2_02  | FOXJ2  | FOXJ2        | 0.0151085 | 6 |
| V\$SPIB_03   | Spi-B  | SPIB         | 0.145739  | 6 |
| V\$POU6F1_03 | POU6F1 | POU6F1       | 0.543765  | 5 |
| V\$SPIB_01   | SPI-B  | SPIB         | 0.145739  | 5 |
| V\$PIT1_Q6   | Pit-1  | POU1F1       | 0.680037  | 5 |
| V\$FOXO4_01  | FOXO4  | FOXO4        | 0.0990171 | 4 |
| V\$OCT2_01   |        | 2-Oct POU2F2 | 0.402634  | 3 |
| V\$STAT5A_Q6 | STAT5A | STAT5A       | 0.302946  | 2 |

hsa-mir-10a

| Matrix_id      | transcription factor | Gene   | PCC        | Occurrence |
|----------------|----------------------|--------|------------|------------|
| V\$IRF4_Q6     | IRF-4                | IRF4   | 0.0354482  | 7          |
| V\$YY1_Q6      | YY1                  | YY1    | 0.100086   | 7          |
| V\$GR_01       | GR                   | NR3C1  | 0.0910587  | 7          |
| V\$GR_Q6       | GR                   | NR3C1  | 0.0910587  | 7          |
| V\$YY1_Q6_02   | YY1                  | YY1    | 0.100086   | 7          |
| V\$YY1_Q6_03   | YY1                  | YY1    | 0.100086   | 6          |
| V\$HNF3A_01    | HNF3A                | FOXA1  | 0.0426083  | 6          |
| V\$HNF1_02     | HNF-1alpha           | HNF1A  | 0.0038385  | 6          |
| V\$DLX5_01     | dlx5                 | DLX5   | 0.0150466  | 6          |
| V\$SMAD4_Q6_01 | Smad4                | SMAD4  | 0.00922339 | 6          |
| V\$AP4_Q6_02   | AP-4                 | TFAP4  | 0.106593   | 6          |
| V\$ELF1_Q6     | Elf-1                | ELF1   | 0.293935   | 6          |
| V\$SOX5_01     | SOX5                 | SOX5   | 0.0477576  | 6          |
| V\$YY1_01      | YY1                  | YY1    | 0.100086   | 6          |
| V\$SOX9_B1     | SOX9                 | SOX9   | 0.137998   | 6          |
| V\$SOX9_Q4     | SOX9                 | SOX9   | 0.137998   | 5          |
| V\$HIF1A_Q6    | HIF-1alpha           | HIF1A  | 0.436819   | 5          |
| V\$YY1_02      | YY1                  | YY1    | 0.100086   | 5          |
| V\$GATA6_01    | GATA-6               | GATA6  | 0.0875485  | 5          |
| V\$HOXD9_Q2    | Hoxd9                | HOXD9  | 0.171452   | 5          |
| V\$HNF4A_Q6_01 | HNF-4alpha           | HNF4A  | 0.465915   | 5          |
| V\$TCF4_Q5     | TCF-4                | TCF7L2 | 0.104259   | 5          |
| V\$HOXA9_01    | hoxa9                | HOXA9  | 0.447263   | 5          |
| V\$HOX13_02    | HOXA5                | HOXA5  | 0.373906   | 4          |
| V\$FOXP3_01    | FOXP3                | FOXP3  | 0.0230651  | 4          |
| V\$AR_03       | AR                   | AR     | 0.00418553 | 4          |
| V\$PITX3_Q2    | PITX3                | PITX3  | 0.139699   | 4          |
| V\$YY1_03      | YY1                  | YY1    | 0.100086   | 4          |
| V\$CMAF_01     | c-Maf                | MAF    | 0.571389   | 4          |
| V\$AR_02       | AR                   | AR     | 0.00418553 | 4          |
| V\$PIT1_Q6     | Pit-1                | POU1F1 | 0.237864   | 3          |

|              |        |              |            |   |
|--------------|--------|--------------|------------|---|
| V\$TCF3_01   | TCF-3  | TCF7L1       | 0.167114   | 3 |
| V\$CRX_Q4_01 | CRX    | CRX          | 0.126537   | 3 |
| V\$AR_Q2     | AR     | AR           | 0.00418553 | 3 |
| V\$CART1_02  | CART1  | ALX1         | 0.0977328  | 3 |
| V\$FOXJ2_01  | FOXJ2  | FOXJ2        | 0.0460081  | 3 |
| V\$E2F1_Q4   | E2F-1  | E2F1         | 0.174805   | 2 |
| V\$STAT3_03  | STAT3  | STAT3        | 0.342888   | 2 |
| V\$MITF_Q6   | MITF   | MITF         | 0.262291   | 2 |
| V\$POU6F1_01 | POU6F1 | POU6F1       | 0.0820239  | 2 |
| V\$AR_01     | AR     | AR           | 0.00418553 | 1 |
| V\$AR_04     | AR     | AR           | 0.00418553 | 1 |
| V\$CDP_01    | CDP    | CUX1         | 0.110613   | 1 |
| V\$CDP_04    | CDP    | CUX1         | 0.110613   | 1 |
| V\$OCT2_01   |        | 2-Oct POU2F2 | 0.208946   | 1 |
| V\$HNF6_Q6   | HNF6   | ONECUT1      | 0.296772   | 1 |

hsa-mir-10b

| Matrix_id      | transcription factor | Gene   | PCC       | Occurrence |
|----------------|----------------------|--------|-----------|------------|
| V\$GR_Q6       | GR                   | NR3C1  | 0.105942  | 2          |
| V\$TCF4_01     | TCF-4                | TCF7L2 | 0.232012  | 2          |
| V\$PUR1_Q4     | PUR1                 | PURA   | 0.0460455 | 2          |
| V\$ZBP89_Q4    | ZBP89                | ZNF148 | 0.0751403 | 2          |
| V\$WT1_Q6      | WT1                  | WT1    | 0.801625  | 2          |
| V\$FKLF_Q5     | FKLF                 | KLF11  | 0.091198  | 2          |
| V\$SMAD4_Q6_01 | Smad4                | SMAD4  | 0.121975  | 2          |
| V\$E2F1_Q3_01  | E2F-1                | E2F1   | 0.0573181 | 2          |
| V\$SP3_Q3      | Sp3                  | SP3    | 0.157676  | 2          |
| V\$EGR1_02     | EGR-1                | EGR1   | 0.177964  | 2          |
| V\$ER71_02     | ER71                 | ETV2   | 0.0463571 | 2          |
| V\$E2F1_Q3     | E2F-1                | E2F1   | 0.0573181 | 2          |
| V\$WT1_Q6_01   | WT1                  | WT1    | 0.801625  | 2          |
| V\$E2F1_Q6     | E2F-1                | E2F1   | 0.0573181 | 2          |
| V\$ZIC3_01     | Zic3                 | ZIC3   | 0.243079  | 2          |
| V\$DLX5_01     | dlx5                 | DLX5   | 0.0422554 | 2          |
| V\$HOXD9_Q2    | Hoxd9                | HOXD9  | 0.292917  | 1          |
| V\$HIF1A_Q6    | HIF-1alpha           | HIF1A  | 0.370632  | 1          |
| V\$HBP1_Q2     | hbp1                 | HBP1   | 0.0562159 | 1          |
| V\$PBX1_Q4     | Pbx1                 | PBX1   | 0.663488  | 1          |
| V\$MSX1_Q1     | Msx-1                | MSX1   | 0.396623  | 1          |
| V\$E2F1_Q4     | E2F-1                | E2F1   | 0.0573181 | 1          |
| V\$FAC1_Q1     | FAC1                 | BPTF   | 0.298454  | 1          |
| V\$AR_Q1       | AR                   | AR     | 0.0287441 | 1          |

|               |       |       |           |   |
|---------------|-------|-------|-----------|---|
| V\$E2F1_Q6_01 | E2F-1 | E2F1  | 0.0573181 | 1 |
| V\$GR_01      | GR    | NR3C1 | 0.105942  | 1 |
| V\$TBP_Q6     | TBP   | TBP   | 0.117195  | 1 |
| V\$AR_04      | AR    | AR    | 0.0287441 | 1 |
| V\$CDP_04     | CDP   | CUX1  | 0.207064  | 1 |
| V\$HOXA9_01   | hoxa9 | HOXA9 | 0.364197  | 1 |
| V\$MITF_Q6    | MITF  | MITF  | 0.580163  | 1 |

hsa-mir-1-1

| Matrix_id      | transcription factor | Gene     | PCC        | Occurrence |
|----------------|----------------------|----------|------------|------------|
| V\$PUR1_Q4     | PUR1                 | PURA     | 0.284904   | 871        |
| V\$IK_Q5       | Ikaros               | IKZF1    | 0.636806   | 859        |
| V\$PEA3_Q6     | PEA3                 | ETV4     | 0.645544   | 827        |
| V\$AP2REP_01   | AP-2rep              | KLF12    | 0.820084   | 822        |
| V\$P300_01     | p300                 | EP300    | 0.685502   | 806        |
| V\$SMAD4_Q6_01 | Smad4                | SMAD4    | 0.660973   | 757        |
| V\$ZIC3_01     | Zic3                 | ZIC3     | 0.442801   | 755        |
| V\$CMYB_Q5     | c-Myb                | MYB      | 0.227328   | 733        |
| V\$MYB_Q6      | c-Myb                | MYB      | 0.227328   | 733        |
| V\$NR1B2_Q6    | NR1B2                | RARB     | 0.724407   | 705        |
| V\$NFAT4_Q3    | NF-AT4               | NFATC3   | 0.429876   | 699        |
| V\$TBX5_02     | TBX5                 | TBX5     | 0.865621   | 696        |
| V\$CETS1_Q6    | C-ets-1              | ETS1     | 0.626654   | 694        |
| V\$GATA1_01    | GATA-1               | GATA1    | 0.733512   | 688        |
| V\$TTF1_Q5     | TTF-1                | NKX2-1   | 0.388528   | 685        |
| V\$ETS2_Q6     | c-Ets-2              | ETS2     | 0.53543    | 675        |
| V\$SMAD3_Q6_01 | Smad3                | SMAD3    | 0.69902    | 665        |
| V\$YY1_01      | YY1                  | YY1      | 0.289722   | 659        |
| V\$GABPA_Q4    | GABP-alpha           | GABPA    | 0.369465   | 658        |
| V\$Elf5_Q3     | ELF5                 | ELF5     | 0.130899   | 653        |
| V\$MEF2C_Q4    | MEF-2C               | MEF2C    | 0.344095   | 653        |
| V\$DLX5_01     | dlx5                 | DLX5     | 0.00406789 | 640        |
| V\$GR_Q6       | GR                   | NR3C1    | 0.556708   | 639        |
| V\$IPF1_01     | IPF1                 | PDX1     | 0.86259    | 628        |
| V\$AML1_Q6     | AML1                 | RUNX1    | 0.735806   | 626        |
| V\$NANOG_Q2    | Nanog                | NANOG    | 0.787963   | 625        |
| V\$AP4_Q6_Q2   | AP-4                 | TFAP4    | 0.56931    | 604        |
| V\$HNF4A_Q6_01 | HNF-4alpha           | HNF4A    | 0.272079   | 599        |
| V\$TBX5_Q1     | TBX5                 | TBX5     | 0.865621   | 575        |
| V\$MAZ_Q6      | MAZ                  | MAZ      | 0.328774   | 551        |
| V\$LRF_Q2      | LRF                  | ZBTB7A   | 0.824246   | 541        |
| V\$BEN_Q1      | BEN                  | GTF2IRD1 | 0.823154   | 541        |

|                   |           |         |           |     |
|-------------------|-----------|---------|-----------|-----|
| V\$ERBETA_Q5      | ER-beta   | ESR2    | 0.601198  | 537 |
| V\$SP1_Q6         | Sp1       | SP1     | 0.837829  | 509 |
| V\$E2A_Q6         | E2A       | TCF3    | 0.704103  | 505 |
| V\$E12_Q6         | E12       | TCF3    | 0.704103  | 505 |
| V\$TEL1_02        | TEL1      | ETV6    | 0.804904  | 504 |
| V\$ELK1_02        | Elk-1     | ELK1    | 0.645852  | 503 |
| V\$E47_02         | E47       | TCF3    | 0.704103  | 502 |
| V\$MYOD_Q6_01     | MyoD      | MYOD1   | 0.693623  | 501 |
| V\$ETV3_02        | ETV3      | ETV3    | 0.584393  | 489 |
| V\$ING4_01        | ING4      | ING4    | 0.0867976 | 487 |
| V\$ZBP89_Q4       | ZBP89     | ZNF148  | 0.669612  | 485 |
| V\$MYOGENIN_Q6    | myogenin  | MYOG    | 0.666344  | 481 |
| V\$ER71_02        | ER71      | ETV2    | 0.601489  | 480 |
| V\$AP2ALPHA_Q6    | AP-2alpha | TFAP2A  | 0.0823676 | 459 |
| V\$ELK1_06        | ELK-1     | ELK1    | 0.645852  | 457 |
| V\$SP1_Q6_01      | Sp1       | SP1     | 0.837829  | 452 |
| V\$TCF3_01        | TCF-3     | TCF7L1  | 0.65737   | 448 |
| V\$SP1_01         | Sp1       | SP1     | 0.837829  | 446 |
| V\$SP1_Q4_01      | Sp1       | SP1     | 0.837829  | 437 |
| V\$TEF1_Q6_03     | TEF-1     | TEAD1   | 0.805734  | 433 |
| V\$AP4_Q5         | AP-4      | TFAP4   | 0.56931   | 430 |
| V\$ETV7_01        | ETV7      | ETV7    | 0.790083  | 429 |
| V\$AP2ALPHA_01    | AP-2alpha | TFAP2A  | 0.0823676 | 429 |
| V\$FKLF_Q5        | FKLF      | KLF11   | 0.17278   | 427 |
| V\$SP1_Q2_01      | Sp1       | SP1     | 0.837829  | 426 |
| V\$WT1_Q6_01      | WT1       | WT1     | 0.0446018 | 422 |
| V\$TFII_Q6        | TFII-I    | GTF2I   | 0.667357  | 406 |
| V\$EHF_03         | EHF       | EHF     | 0.139131  | 404 |
| V\$ERF_02         | ERF       | ERF     | 0.549768  | 403 |
| V\$E2A_Q2         | E2A       | TCF3    | 0.704103  | 402 |
| V\$CMYB_01        | c-Myb     | MYB     | 0.227328  | 401 |
| V\$SP1_02         | SP1       | SP1     | 0.837829  | 396 |
| V\$AP4_Q6         | AP-4      | TFAP4   | 0.56931   | 385 |
| V\$TEF1_Q6        | TEF-1     | TEAD1   | 0.805734  | 379 |
| V\$AML1_01        | AML1a     | RUNX1   | 0.735806  | 371 |
| V\$ZFX_01         | Zfx       | ZFX     | 0.745319  | 370 |
| V\$ERR1_Q3        | ERR1      | ESRRA   | 0.811703  | 358 |
| V\$MYOGENIN_Q6_01 | myogenin  | MYOG    | 0.666344  | 355 |
| V\$AML1_Q4        | AML1      | RUNX1   | 0.735806  | 338 |
| V\$CREM_Q6        | CREM      | CREM    | 0.284686  | 333 |
| V\$ZIC1_01        | Zic1      | ZIC1    | 0.154819  | 326 |
| V\$NEUROD_02      | NeuroD    | NEUROD1 | 0.722997  | 317 |
| V\$SMAD3_Q6       | SMAD3     | SMAD3   | 0.69902   | 314 |
| V\$MYOD_Q6        | MyoD      | MYOD1   | 0.693623  | 309 |
| V\$AP2GAMMA_01    | AP-2gamma | TFAP2C  | 0.191264  | 305 |
| V\$AP2BETA_Q3     | AP-2beta  | TFAP2B  | 0.732459  | 302 |

|                |           |          |           |     |
|----------------|-----------|----------|-----------|-----|
| V\$DAX1_01     | Dax1      | NR0B1    | 0.549336  | 302 |
| V\$PAX8_01     | Pax-8     | PAX8     | 0.460136  | 294 |
| V\$MEF2A_Q6    | mef2A     | MEF2A    | 0.0937993 | 292 |
| V\$GABPBETA_Q3 | GABP-beta | GABPB1   | 0.593327  | 292 |
| V\$CNOT3_01    | CNOT3     | CNOT3    | 0.721805  | 281 |
| V\$MYOD_Q6_02  | MyoD      | MYOD1    | 0.693623  | 274 |
| V\$VDR_Q3      | VDR       | VDR      | 0.747682  | 271 |
| V\$ERG_03      | ERG       | ERG      | 0.689524  | 271 |
| V\$PET1_02     | Pet-1     | FEV      | 0.509968  | 270 |
| V\$DBP_Q6_01   | DBP       | DBP      | 0.797486  | 269 |
| V\$MATH1_Q2    | MATH1     | ATOH1    | 0.593323  | 256 |
| V\$KAISO_01    | KAISO     | ZBTB33   | 0.862789  | 252 |
| V\$ATF1_Q6_01  | ATF-1     | ATF1     | 0.527509  | 249 |
| V\$MYOD_01     | MyoD      | MYOD1    | 0.693623  | 243 |
| V\$ATF3_Q6_01  | ATF-3     | ATF3     | 0.157726  | 219 |
| V\$ERG_01      | ERG       | ERG      | 0.689524  | 205 |
| V\$CIZ_01      | CIZ       | ZNF384   | 0.466011  | 204 |
| V\$P53_02      | p53       | TP53     | 0.313002  | 186 |
| V\$BEN_02      | BEN       | GTF2IRD1 | 0.823154  | 149 |
| V\$STAF_02     | Staf      | ZNF143   | 0.731546  | 140 |
| V\$SMAD4_Q6    | SMAD4     | SMAD4    | 0.660973  | 135 |
| V\$EGR2_01     | Egr-2     | EGR2     | 0.230855  | 129 |
| V\$GLI_Q2      | GLI       | GLI1     | 0.68613   | 117 |
| V\$NUR77_Q5    | NUR77     | NR4A1    | 0.347567  | 116 |
| V\$ERR3_Q2     | ERR3      | ESRRG    | 0.585696  | 108 |
| V\$GLI3_Q5_01  | GLI3      | GLI3     | 0.634096  | 94  |
| V\$ATF6_01     | ATF6      | ATF6     | 0.294647  | 91  |
| V\$AMEF2_Q6    | aMEF-2    | MEF2A    | 0.0937993 | 91  |
| V\$GLI2_01     | GLI2      | GLI2     | 0.768536  | 76  |
| V\$RSRFC4_Q2   | RSRFC4    | MEF2A    | 0.0937993 | 76  |
| V\$ERR3_Q2_01  | ERR3      | ESRRG    | 0.585696  | 72  |
| V\$GLI3_Q2     | GLI3      | GLI3     | 0.634096  | 70  |
| V\$GCNF_Q3     | GCNF      | NR6A1    | 0.446207  | 69  |
| V\$RSRFC4_Q1   | RSRFC4    | MEF2A    | 0.0937993 | 61  |
| V\$GLI3_Q1     | GLI3      | GLI3     | 0.634096  | 59  |
| V\$HLF_Q1      | HLF       | HLF      | 0.0846727 | 42  |
| V\$E4BP4_Q1    | E4BP4     | NFIL3    | 0.572627  | 37  |
| V\$MEF2A_Q5    | MEF2A     | MEF2A    | 0.0937993 | 17  |

hsa-mir-1-2

| Matrix_id | transcription factor | Gene  | PCC      | Occurrence |
|-----------|----------------------|-------|----------|------------|
| V\$IK_Q5  | Ikaros               | IKZF1 | 0.636806 | 859        |

|                |            |        |            |     |
|----------------|------------|--------|------------|-----|
| V\$PARP_Q4     | PARP       | PARP1  | 0.509037   | 828 |
| V\$PEA3_Q6     | PEA3       | ETV4   | 0.645544   | 827 |
| V\$AP2REP_01   | AP-2rep    | KLF12  | 0.820084   | 822 |
| V\$P300_01     | p300       | EP300  | 0.685502   | 806 |
| V\$SMAD4_Q6_01 | Smad4      | SMAD4  | 0.660973   | 757 |
| V\$ZIC3_01     | Zic3       | ZIC3   | 0.442801   | 755 |
| V\$CMYB_Q5     | c-Myb      | MYB    | 0.227328   | 733 |
| V\$MYB_Q6      | c-Myb      | MYB    | 0.227328   | 733 |
| V\$CDX2_Q5_02  | CDX-2      | CDX2   | 0.741281   | 718 |
| V\$TBP_Q6      | TBP        | TBP    | 0.258549   | 718 |
| V\$NR1B2_Q6    | NR1B2      | RARB   | 0.724407   | 705 |
| V\$NFAT4_Q3    | NF-AT4     | NFATC3 | 0.429876   | 699 |
| V\$TBX5_02     | TBX5       | TBX5   | 0.865621   | 696 |
| V\$CETS1_Q6    | C-ets-1    | ETS1   | 0.626654   | 694 |
| V\$GATA1_01    | GATA-1     | GATA1  | 0.733512   | 688 |
| V\$ETS1_B      | c-Ets-1    | ETS1   | 0.626654   | 687 |
| V\$TTF1_Q5     | TTF-1      | NKX2-1 | 0.388528   | 685 |
| V\$ETS2_Q6     | c-Ets-2    | ETS2   | 0.53543    | 675 |
| V\$SMAD3_Q6_01 | Smad3      | SMAD3  | 0.69902    | 665 |
| V\$YY1_01      | YY1        | YY1    | 0.289722   | 659 |
| V\$GABPA_Q4    | GABP-alpha | GABPA  | 0.369465   | 658 |
| V\$Elf5_03     | ELF5       | ELF5   | 0.130899   | 653 |
| V\$MEF2C_Q4    | MEF-2C     | MEF2C  | 0.344095   | 653 |
| V\$DLX5_01     | dlx5       | DLX5   | 0.00406789 | 640 |
| V\$GR_Q6       | GR         | NR3C1  | 0.556708   | 639 |
| V\$IPF1_01     | IPF1       | PDX1   | 0.86259    | 628 |
| V\$AML1_Q6     | AML1       | RUNX1  | 0.735806   | 626 |
| V\$NANOG_02    | Nanog      | NANOG  | 0.787963   | 625 |
| V\$YY1_Q6      | YY1        | YY1    | 0.289722   | 623 |
| V\$SOX5_01     | SOX5       | SOX5   | 0.483194   | 618 |
| V\$AP4_Q6_02   | AP-4       | TFAP4  | 0.56931    | 604 |
| V\$HNF4A_Q6_01 | HNF-4alpha | HNF4A  | 0.272079   | 599 |
| V\$GATA1_02    | GATA-1     | GATA1  | 0.733512   | 599 |
| V\$ETS2_B      | c-Ets-2    | ETS2   | 0.53543    | 587 |
| V\$GATA2_02    | GATA-2     | GATA2  | 0.298638   | 580 |
| V\$GATA6_01    | GATA-6     | GATA6  | 0.0850993  | 580 |
| V\$GATA1_06    | GATA-1     | GATA1  | 0.733512   | 580 |
| V\$GATA1_05    | GATA-1     | GATA1  | 0.733512   | 580 |
| V\$TBX5_01     | TBX5       | TBX5   | 0.865621   | 575 |
| V\$SPI1_Q5     | SPI1       | SPI1   | 0.261517   | 571 |
| V\$IPF1_Q6     | IPF1       | PDX1   | 0.86259    | 571 |
| V\$CDX2_Q5_01  | Cdx-2      | CDX2   | 0.741281   | 558 |
| V\$SRY_02      | SRY        | SRY    | 0.541791   | 551 |
| V\$MAZ_Q6      | MAZ        | MAZ    | 0.328774   | 551 |
| V\$IPF1_Q4_01  | IPF1       | PDX1   | 0.86259    | 547 |
| V\$LRF_Q2      | LRF        | ZBTB7A | 0.824246   | 541 |

|               |            |         |           |     |
|---------------|------------|---------|-----------|-----|
| V\$CDX2_01    | Cdx-2      | CDX2    | 0.741281  | 539 |
| V\$FOXO3A_Q1  | FOXO3A     | FOXO3   | 0.423087  | 528 |
| V\$PARP_Q3    | PARP       | PARP1   | 0.509037  | 521 |
| V\$NFAT2_Q5   | NF-AT2     | NFATC1  | 0.846281  | 519 |
| V\$HNF3B_Q6   | HNF-3beta  | FOXA2   | 0.431652  | 514 |
| V\$IRF4_Q6    | IRF-4      | IRF4    | 0.804591  | 511 |
| V\$E2A_Q6     | E2A        | TCF3    | 0.704103  | 505 |
| V\$E12_Q6     | E12        | TCF3    | 0.704103  | 505 |
| V\$TEL1_02    | TEL1       | ETV6    | 0.804904  | 504 |
| V\$ELK1_02    | Elk-1      | ELK1    | 0.645852  | 503 |
| V\$E47_02     | E47        | TCF3    | 0.704103  | 502 |
| V\$MYOD_Q6_01 | MyoD       | MYOD1   | 0.693623  | 501 |
| V\$GATA1_04   | GATA-1     | GATA1   | 0.733512  | 500 |
| V\$ETV3_02    | ETV3       | ETV3    | 0.584393  | 489 |
| V\$ING4_01    | ING4       | ING4    | 0.0867976 | 487 |
| V\$ZBP89_Q4   | ZBP89      | ZNF148  | 0.669612  | 485 |
| V\$ER71_02    | ER71       | ETV2    | 0.601489  | 480 |
| V\$HNF3A_01   | HNF3A      | FOXA1   | 0.373011  | 478 |
| V\$ELK1_06    | ELK-1      | ELK1    | 0.645852  | 457 |
| V\$IPF1_Q4    | IPF1       | PDX1    | 0.86259   | 456 |
| V\$TCF3_01    | TCF-3      | TCF7L1  | 0.65737   | 448 |
| V\$ARNT_01    | Arnt       | ARNT    | 0.759719  | 438 |
| V\$HNF1_02    | HNF-1alpha | HNF1A   | 0.738035  | 433 |
| V\$AP4_Q5     | AP-4       | TFAP4   | 0.56931   | 430 |
| V\$GFI1_Q6    | Gfi1       | GFI1    | 0.341059  | 429 |
| V\$RFX1_02    | RFX1       | RFX1    | 0.807434  | 419 |
| V\$FOXJ2_01   | FOXJ2      | FOXJ2   | 0.643938  | 419 |
| V\$GFI1_Q6_01 | Gfi1       | GFI1    | 0.341059  | 415 |
| V\$FOXP3_01   | FOXP3      | FOXP3   | 0.736199  | 415 |
| V\$CEBPE_Q6   | CEBPE      | CEBPE   | 0.560226  | 412 |
| V\$GATA2_01   | GATA-2     | GATA2   | 0.298638  | 409 |
| V\$SOX10_Q6   | SOX10      | SOX10   | 0.341071  | 408 |
| V\$FOXM1_01   | FOXM1      | FOXM1   | 0.157659  | 408 |
| V\$ERF_02     | ERF        | ERF     | 0.549768  | 403 |
| V\$CMYB_01    | c-Myb      | MYB     | 0.227328  | 401 |
| V\$OC2_Q3     | OC-2       | ONECUT2 | 0.805198  | 382 |
| V\$AML1_01    | AML1a      | RUNX1   | 0.735806  | 371 |
| V\$RFX1_01    | RFX1       | RFX1    | 0.807434  | 369 |
| V\$GFI1B_01   | Gfi1b      | GFI1B   | 0.886126  | 346 |
| V\$AML1_Q4    | AML1       | RUNX1   | 0.735806  | 338 |
| V\$CEBPB_02   | C/EBPbeta  | CEBPB   | 0.177725  | 325 |
| V\$HOXA9_01   | hoxa9      | HOXA9   | 0.426344  | 315 |
| V\$NKX2B_Q3   | NKX2B      | NKX2-2  | 0.186511  | 314 |
| V\$CEBPD_Q6   | C/EBPdelta | CEBPD   | 0.16415   | 312 |
| V\$BCL6_Q3_01 | Bcl-6      | BCL6    | 0.769567  | 308 |
| V\$E47_01     | E47        | TCF3    | 0.704103  | 307 |

|              |           |        |           |     |
|--------------|-----------|--------|-----------|-----|
| V\$FAC1_01   | FAC1      | BPTF   | 0.200283  | 307 |
| V\$CDX1_01   | Cdx-1     | CDX1   | 0.507112  | 301 |
| V\$NKX22_02  | NKX2B     | NKX2-2 | 0.186511  | 300 |
| V\$PAX8_01   | Pax-8     | PAX8   | 0.460136  | 294 |
| V\$LHX3b_01  | LHX3b     | LHX3   | 0.809368  | 289 |
| V\$MSX1_01   | Msx-1     | MSX1   | 0.478472  | 280 |
| V\$CEBPB_Q6  | C/EBPbeta | CEBPB  | 0.177725  | 267 |
| V\$AML2_01   | AML2      | RUNX3  | 0.498381  | 258 |
| V\$NCX_02    | Ncx       | TLX2   | 0.815303  | 247 |
| V\$CART1_02  | CART1     | ALX1   | 0.728961  | 223 |
| V\$CDX2_Q5   | Cdx-2     | CDX2   | 0.741281  | 222 |
| V\$IPF1_06   | ipf1      | PDX1   | 0.86259   | 204 |
| V\$HOXB8_01  | HOXB8     | HOXB8  | 0.447908  | 203 |
| V\$IPF1_03   | IPF1      | PDX1   | 0.86259   | 192 |
| V\$LHX3_01   | Lhx3      | LHX3   | 0.809368  | 147 |
| V\$PAX3_B    | Pax-3     | PAX3   | 0.753377  | 140 |
| V\$CEBPB_01  | C/EBPbeta | CEBPB  | 0.177725  | 139 |
| V\$HNF1B_01  | HNF-1beta | HNF1B  | 0.345026  | 122 |
| V\$RSRFC4_Q2 | RSRFC4    | MEF2A  | 0.0937993 | 76  |
| V\$HOXA7_01  | HOXA7     | HOXA7  | 0.257072  | 70  |
| V\$RSRFC4_01 | RSRFC4    | MEF2A  | 0.0937993 | 61  |
| V\$LHX3A_01  | Lhx3a     | LHX3   | 0.809368  | 29  |
| V\$AFP1_Q6   | AFP1      | ZFHX3  | 0.326333  | 24  |

hsa-mir-122

| Matrix_id      | transcription factor | Gene  | PCC       | Occurrence |
|----------------|----------------------|-------|-----------|------------|
| V\$ELF1_Q6     | Elf-1                | ELF1  | 0.192827  | 242        |
| V\$MAFB_01     | MAFB                 | MAFB  | 0.383476  | 239        |
| V\$TBX5_02     | TBX5                 | TBX5  | 0.132419  | 227        |
| V\$NR1B2_Q6    | NR1B2                | RARB  | 0.117271  | 226        |
| V\$CDX2_Q5_02  | CDX-2                | CDX2  | 0.105817  | 215        |
| V\$GATA1_01    | GATA-1               | GATA1 | 0.0128229 | 215        |
| V\$SMAD3_Q6_01 | Smad3                | SMAD3 | 0.0915205 | 203        |
| V\$HNF4A_Q6_01 | HNF-4alpha           | HNF4A | 0.316168  | 191        |
| V\$SOX5_01     | SOX5                 | SOX5  | 0.149287  | 185        |
| V\$SPI1_03     | SPI1                 | SPI1  | 0.268782  | 178        |
| V\$ERBETA_Q5   | ER-beta              | ESR2  | 0.303769  | 176        |
| V\$GATA1_02    | GATA-1               | GATA1 | 0.0128229 | 173        |
| V\$GATA1_05    | GATA-1               | GATA1 | 0.0128229 | 168        |
| V\$GATA1_06    | GATA-1               | GATA1 | 0.0128229 | 168        |
| V\$CDX2_Q5_01  | Cdx-2                | CDX2  | 0.105817  | 167        |
| V\$MAZ_Q6      | MAZ                  | MAZ   | 0.414832  | 166        |



|                |            |         |           |     |
|----------------|------------|---------|-----------|-----|
| V\$MYOD_Q6_01  | MyoD       | MYOD1   | 0.306424  | 164 |
| V\$PITX3_Q2    | PITX3      | PITX3   | 0.127413  | 160 |
| V\$ING4_01     | ING4       | ING4    | 0.234372  | 158 |
| V\$HNF3B_Q6    | HNF-3beta  | FOXA2   | 0.44036   | 154 |
| V\$CDX2_01     | Cdx-2      | CDX2    | 0.105817  | 152 |
| V\$CRX_Q4      | Crx        | CRX     | 0.243011  | 149 |
| V\$HNF3A_01    | HNF3A      | FOXA1   | 0.140429  | 148 |
| V\$GATA1_04    | GATA-1     | GATA1   | 0.0128229 | 139 |
| V\$ERR1_Q3     | ERR1       | ESRRA   | 0.18197   | 135 |
| V\$CEBPE_Q6    | CEBPE      | CEBPE   | 0.0949125 | 133 |
| V\$HNF1_02     | HNF-1alpha | HNF1A   | 0.363153  | 122 |
| V\$CRX_Q2      | Crx        | CRX     | 0.243011  | 119 |
| V\$NEUROD_Q2   | NeuroD     | NEUROD1 | 0.0402891 | 114 |
| V\$MAZ_Q6_01   | MAZ        | MAZ     | 0.414832  | 110 |
| V\$OC2_Q3      | OC-2       | ONECUT2 | 0.124899  | 102 |
| V\$IRF7_Q3     | IRF-7      | IRF7    | 0.13082   | 100 |
| V\$PIT1_Q6     | Pit-1      | POU1F1  | 0.319886  | 99  |
| V\$DBP_Q6_01   | DBP        | DBP     | 0.043001  | 76  |
| V\$CEBPG_Q6_01 | C/EBPgamma | CEBPG   | 0.027117  | 73  |
| V\$MYOD_Q1     | MyoD       | MYOD1   | 0.306424  | 72  |
| V\$CREL_Q1     | c-Rel      | REL     | 0.29444   | 44  |
| V\$CEBPG_Q6    | C/EBPgamma | CEBPG   | 0.027117  | 43  |
| V\$ATF4_Q6     | ATF-4      | ATF4    | 0.0251237 | 40  |
| V\$HOXA7_Q1    | HOXA7      | HOXA7   | 0.397453  | 31  |
| V\$E2F1_Q4     | E2F-1      | E2F1    | 0.110614  | 29  |
| V\$ATF5_Q1     | ATF5       | ATF5    | 0.912782  | 26  |

hsa-mir-124-1

| Matrix_id    | transcription factor | Gene  | PCC       | Occurrence |
|--------------|----------------------|-------|-----------|------------|
| V\$PUR1_Q4   | PUR1                 | PURA  | 0.415305  | 488        |
| V\$MAFB_Q1   | MAFB                 | MAFB  | 0.168403  | 452        |
| V\$PARP_Q4   | PARP                 | PARP1 | 0.42105   | 444        |
| V\$ZIC3_Q1   | Zic3                 | ZIC3  | 0.193283  | 441        |
| V\$ETS2_Q6   | c-Ets-2              | ETS2  | 0.191264  | 405        |
| V\$GABPA_Q4  | GABP-alpha           | GABPA | 0.137733  | 392        |
| V\$TBP_Q6    | TBP                  | TBP   | 0.0201133 | 383        |
| V\$AP4_Q6_02 | AP-4                 | TFAP4 | 0.410215  | 365        |
| V\$YY1_Q1    | YY1                  | YY1   | 0.0996927 | 358        |
| V\$GR_Q6     | GR                   | NR3C1 | 0.0589335 | 352        |
| V\$MEF2C_Q4  | MEF-2C               | MEF2C | 0.810817  | 348        |
| V\$YY1_Q6    | YY1                  | YY1   | 0.0996927 | 330        |
| V\$YY1_Q6_02 | YY1                  | YY1   | 0.0996927 | 330        |

|               |           |               |            |     |
|---------------|-----------|---------------|------------|-----|
| V\$ETS2_B     | c-Ets-2   | ETS2          | 0.191264   | 328 |
| V\$DLX5_01    | dlx5      | DLX5          | 0.00562739 | 325 |
| V\$SOX9_B1    | SOX9      | SOX9          | 0.237282   | 320 |
| V\$SRY_02     | SRY       | SRY           | 0.175179   | 291 |
| V\$PARP_Q3    | PARP      | PARP1         | 0.42105    | 286 |
| V\$ING4_01    | ING4      | ING4          | 0.696964   | 281 |
| V\$HNF3B_Q6   | HNF-3beta | FOXA2         | 0.0600266  | 272 |
| V\$FOXO3A_Q1  | FOXO3A    | FOXO3         | 0.0455022  | 262 |
| V\$PBX1_04    | Pbx1      | PBX1          | 0.226624   | 257 |
| V\$YY1_Q6_03  | YY1       | YY1           | 0.0996927  | 248 |
| V\$IRF8_Q6    | IRF-8     | IRF8          | 0.0939808  | 214 |
| V\$CREM_Q6    | CREM      | CREM          | 0.0171356  | 213 |
| V\$GR_01      | GR        | NR3C1         | 0.0589335  | 205 |
| V\$CP2_01     | CP2       | TFCP2         | 0.248145   | 174 |
| V\$NEUROD_02  | NeuroD    | NEUROD1       | 0.0986588  | 172 |
| V\$ATF1_Q6_01 | ATF-1     | ATF1          | 0.00388072 | 169 |
| V\$NKX2B_Q3   | NKX2B     | NKX2-2        | 0.879144   | 155 |
| V\$FAC1_01    | FAC1      | BPTF          | 0.141342   | 151 |
| V\$NURR1_Q3   | NURR1     | NR4A2         | 0.125676   | 149 |
| V\$NKX22_02   | NKX2B     | NKX2-2        | 0.879144   | 149 |
| V\$LHX3b_01   | LHX3b     | LHX3          | 0.014696   | 148 |
| V\$DBP_Q6_01  | DBP       | DBP           | 0.268051   | 146 |
| V\$HOXB8_01   | HOXB8     | HOXB8         | 0.317144   | 106 |
| V\$DEC2_Q2    |           | 2-Dec BHLHE41 | 0.670424   | 95  |
| V\$E2F1_Q4    | E2F-1     | E2F1          | 0.133834   | 79  |
| V\$STAT4_Q5   | STAT4     | STAT4         | 0.0379536  | 77  |
| V\$LHX3_01    | Lhx3      | LHX3          | 0.014696   | 74  |
| V\$CDP_04     | CDP       | CUX1          | 0.0599151  | 68  |
| V\$AMEF2_Q6   | aMEF-2    | MEF2A         | 0.671304   | 54  |
| V\$IRF2_01    | IRF-2     | IRF2          | 0.00731017 | 44  |
| V\$RSRFC4_Q2  | RSRFC4    | MEF2A         | 0.671304   | 41  |
| V\$RSRFC4_01  | RSRFC4    | MEF2A         | 0.671304   | 38  |

hsa-mir-124-2

| Matrix_id   | transcription factor | Gene  | PCC      | Occurrence |
|-------------|----------------------|-------|----------|------------|
| V\$PUR1_Q4  | PUR1                 | PURA  | 0.415305 | 488        |
| V\$MAFB_01  | MAFB                 | MAFB  | 0.168403 | 452        |
| V\$PARP_Q4  | PARP                 | PARP1 | 0.42105  | 444        |
| V\$ZIC3_01  | Zic3                 | ZIC3  | 0.193283 | 441        |
| V\$ETS2_Q6  | c-Ets-2              | ETS2  | 0.191264 | 405        |
| V\$GABPA_Q4 | GABP-alpha           | GABPA | 0.137733 | 392        |
| V\$SOX9_Q4  | SOX9                 | SOX9  | 0.237282 | 392        |

|               |            |               |            |     |
|---------------|------------|---------------|------------|-----|
| V\$TBP_Q6     | TBP        | TBP           | 0.0201133  | 383 |
| V\$AP4_Q6_02  | AP-4       | TFAP4         | 0.410215   | 365 |
| V\$MAZ_Q6     | MAZ        | MAZ           | 0.22392    | 358 |
| V\$YY1_01     | YY1        | YY1           | 0.0996927  | 358 |
| V\$GR_Q6      | GR         | NR3C1         | 0.0589335  | 352 |
| V\$MEF2C_Q4   | MEF-2C     | MEF2C         | 0.810817   | 348 |
| V\$YY1_Q6_02  | YY1        | YY1           | 0.0996927  | 330 |
| V\$YY1_Q6     | YY1        | YY1           | 0.0996927  | 330 |
| V\$ETS2_B     | c-Ets-2    | ETS2          | 0.191264   | 328 |
| V\$DLX5_01    | dlx5       | DLX5          | 0.00562739 | 325 |
| V\$SOX9_B1    | SOX9       | SOX9          | 0.237282   | 320 |
| V\$ZBP89_Q4   | ZBP89      | ZNF148        | 0.114715   | 291 |
| V\$SR_Y02     | SR_Y       | SR_Y          | 0.175179   | 291 |
| V\$PARP_Q3    | PARP       | PARP1         | 0.42105    | 286 |
| V\$TFII_Q6    | TFII-I     | GTF2I         | 0.265351   | 286 |
| V\$ING4_01    | ING4       | ING4          | 0.696964   | 281 |
| V\$FOXO3A_Q1  | FOXO3A     | FOXO3         | 0.0455022  | 262 |
| V\$PITX3_Q2   | PITX3      | PITX3         | 0.0373143  | 257 |
| V\$PBX1_04    | Pbx1       | PBX1          | 0.226624   | 257 |
| V\$MAZ_Q6_01  | MAZ        | MAZ           | 0.22392    | 253 |
| V\$YY1_Q6_03  | YY1        | YY1           | 0.0996927  | 248 |
| V\$KLF15_Q2   | KLF15      | KLF15         | 0.0367954  | 220 |
| V\$IRF8_Q6    | IRF-8      | IRF8          | 0.0939808  | 214 |
| V\$SREBP1_Q6  | SREBP-1    | SREBF1        | 0.015246   | 214 |
| V\$CREM_Q6    | CREM       | CREM          | 0.0171356  | 213 |
| V\$SOX10_Q6   | SOX10      | SOX10         | 0.725179   | 207 |
| V\$GR_01      | GR         | NR3C1         | 0.0589335  | 205 |
| V\$CP2_01     | CP2        | TFCP2         | 0.248145   | 174 |
| V\$ATF1_Q6_01 | ATF-1      | ATF1          | 0.00388072 | 169 |
| V\$MEF2A_Q6   | mef2A      | MEF2A         | 0.671304   | 149 |
| V\$LHX3b_01   | LHX3b      | LHX3          | 0.014696   | 148 |
| V\$ATF4_Q6    | ATF-4      | ATF4          | 0.0796929  | 115 |
| V\$HOXB8_01   | HOXB8      | HOXB8         | 0.317144   | 106 |
| V\$EAR2_Q2    | EAR2       | NR2F6         | 0.00028374 | 102 |
| V\$DEC2_Q2    |            | 2-Dec BHLHE41 | 0.670424   | 95  |
| V\$ATF2_Q5    | ATF-2      | ATF2          | 0.0154679  | 81  |
| V\$EGR2_01    | Egr-2      | EGR2          | 0.220865   | 81  |
| V\$ERR3_Q2    | ERR3       | ESRRG         | 0.0992981  | 76  |
| V\$LHX3_01    | Lhx3       | LHX3          | 0.014696   | 74  |
| V\$CEBPG_Q6   | C/EBPgamma | CEBPG         | 0.128006   | 66  |
| V\$ERR3_Q2_01 | ERR3       | ESRRG         | 0.0992981  | 60  |
| V\$AMEF2_Q6   | aMEF-2     | MEF2A         | 0.671304   | 54  |
| V\$LHX3A_01   | Lhx3a      | LHX3          | 0.014696   | 22  |
| V\$MEF2A_05   | MEF2A      | MEF2A         | 0.671304   | 20  |

hsa-mir-124-3

| Matrix_id     | transcription factor | Gene    | PCC        | Occurrence |
|---------------|----------------------|---------|------------|------------|
| V\$PUR1_Q4    | PUR1                 | PURA    | 0.415305   | 488        |
| V\$MAFB_01    | MAFB                 | MAFB    | 0.168403   | 452        |
| V\$PARP_Q4    | PARP                 | PARP1   | 0.42105    | 444        |
| V\$ZIC3_01    | Zic3                 | ZIC3    | 0.193283   | 441        |
| V\$ETS2_Q6    | c-Ets-2              | ETS2    | 0.191264   | 405        |
| V\$SOX9_Q4    | SOX9                 | SOX9    | 0.237282   | 392        |
| V\$GABPA_Q4   | GABP-alpha           | GABPA   | 0.137733   | 392        |
| V\$AP4_Q6_02  | AP-4                 | TFAP4   | 0.410215   | 365        |
| V\$YY1_Q6_02  | YY1                  | YY1     | 0.0996927  | 330        |
| V\$YY1_Q6     | YY1                  | YY1     | 0.0996927  | 330        |
| V\$ETS2_B     | c-Ets-2              | ETS2    | 0.191264   | 328        |
| V\$DLX5_01    | dlx5                 | DLX5    | 0.00562739 | 325        |
| V\$ZBP89_Q4   | ZBP89                | ZNF148  | 0.114715   | 291        |
| V\$TFII_Q6    | TFII-I               | GTF2I   | 0.265351   | 286        |
| V\$ELK1_02    | Elk-1                | ELK1    | 0.10691    | 271        |
| V\$FOXO3A_Q1  | FOXO3A               | FOXO3   | 0.0455022  | 262        |
| V\$AP4_Q5     | AP-4                 | TFAP4   | 0.410215   | 254        |
| V\$AP4_Q6     | AP-4                 | TFAP4   | 0.410215   | 232        |
| V\$IRF8_Q6    | IRF-8                | IRF8    | 0.0939808  | 214        |
| V\$SREBP1_Q6  | SREBP-1              | SREBF1  | 0.015246   | 214        |
| V\$CREM_Q6    | CREM                 | CREM    | 0.0171356  | 213        |
| V\$SOX10_Q6   | SOX10                | SOX10   | 0.725179   | 207        |
| V\$SP2_01     | SP2                  | SP2     | 0.0894308  | 196        |
| V\$E2F1_Q3_01 | E2F-1                | E2F1    | 0.133834   | 181        |
| V\$E2F1_Q3    | E2F-1                | E2F1    | 0.133834   | 181        |
| V\$CP2_01     | CP2                  | TFCP2   | 0.248145   | 174        |
| V\$NEUROD_02  | NeuroD               | NEUROD1 | 0.0986588  | 172        |
| V\$ATF1_Q6_01 | ATF-1                | ATF1    | 0.00388072 | 169        |
| V\$SP4_Q5     | SP4                  | SP4     | 0.038657   | 162        |
| V\$AP4_Q6_01  | AP-4                 | TFAP4   | 0.410215   | 162        |
| V\$NURR1_Q3   | NURR1                | NR4A2   | 0.125676   | 149        |
| V\$E2F1_Q6    | E2F-1                | E2F1    | 0.133834   | 145        |
| V\$YY1_02     | YY1                  | YY1     | 0.0996927  | 141        |
| V\$ATF4_Q6    | ATF-4                | ATF4    | 0.0796929  | 115        |
| V\$HOXB8_01   | HOXB8                | HOXB8   | 0.317144   | 106        |
| V\$ATF2_Q5    | ATF-2                | ATF2    | 0.0154679  | 81         |
| V\$EGR2_01    | Egr-2                | EGR2    | 0.220865   | 81         |

hsa-mir-125a

| Matrix_id      | transcription factor | Gene   | PCC       | Occurrence |
|----------------|----------------------|--------|-----------|------------|
| V\$PUR1_Q4     | PUR1                 | PURA   | 0.183695  | 8          |
| V\$GKLF_Q4     | GKLF                 | KLF4   | 0.42926   | 8          |
| V\$GABPA_Q4    | GABP-alpha           | GABPA  | 0.0633009 | 7          |
| V\$ING4_01     | ING4                 | ING4   | 0.0913762 | 6          |
| V\$SP1_Q4_01   | Sp1                  | SP1    | 0.105232  | 6          |
| V\$SP1_Q6_01   | Sp1                  | SP1    | 0.105232  | 6          |
| V\$FKLF_Q5     | FKLF                 | KLF11  | 0.225845  | 6          |
| V\$AP2ALPHA_01 | AP-2alpha            | TFAP2A | 0.643495  | 6          |
| V\$GATA6_01    | GATA-6               | GATA6  | 0.366278  | 6          |
| V\$GATA2_02    | GATA-2               | GATA2  | 0.437837  | 6          |
| V\$GATA3_01    | GATA-3               | GATA3  | 0.604553  | 6          |
| V\$YY1_01      | YY1                  | YY1    | 0.241894  | 6          |
| V\$SP1_Q6      | Sp1                  | SP1    | 0.105232  | 6          |
| V\$ELK1_06     | ELK-1                | ELK1   | 0.0671742 | 5          |
| V\$TBP_Q6      | TBP                  | TBP    | 0.158908  | 5          |
| V\$WT1_Q6      | WT1                  | WT1    | 0.168605  | 5          |
| V\$ELK1_02     | Elk-1                | ELK1   | 0.0671742 | 5          |
| V\$SP1_01      | Sp1                  | SP1    | 0.105232  | 5          |
| V\$WT1_Q6_01   | WT1                  | WT1    | 0.168605  | 5          |
| V\$SP1_Q2_01   | Sp1                  | SP1    | 0.105232  | 5          |
| V\$AHR_Q5      | AhR                  | AHR    | 0.683838  | 5          |
| V\$SP1_02      | SP1                  | SP1    | 0.105232  | 5          |
| V\$AP2ALPHA_Q6 | AP-2alpha            | TFAP2A | 0.643495  | 5          |
| V\$GR_Q6       | GR                   | NR3C1  | 0.0138162 | 5          |
| V\$GATA3_02    | GATA-3               | GATA3  | 0.604553  | 5          |
| V\$SMAD4_Q6_01 | Smad4                | SMAD4  | 0.120369  | 5          |
| V\$YY1_Q6_03   | YY1                  | YY1    | 0.241894  | 5          |
| V\$SP2_01      | SP2                  | SP2    | 0.0487716 | 4          |
| V\$CIZ_01      | CIZ                  | ZNF384 | 0.0497608 | 4          |
| V\$RNF96_01    | RNF96                | TRIM28 | 0.222863  | 4          |
| V\$GR_01       | GR                   | NR3C1  | 0.0138162 | 4          |
| V\$CP2_01      | CP2                  | TFCP2  | 0.444727  | 4          |
| V\$GATA2_01    | GATA-2               | GATA2  | 0.437837  | 4          |
| V\$P53_02      | p53                  | TP53   | 0.220725  | 4          |
| V\$ZABC1_01    | ZABC1                | ZNF217 | 0.500447  | 3          |
| V\$SMAD4_Q6    | SMAD4                | SMAD4  | 0.120369  | 3          |
| V\$GABPBETA_Q3 | GABP-beta            | GABPB1 | 0.202144  | 3          |
| V\$TCF4_Q5     | TCF-4                | TCF7L2 | 0.406284  | 2          |
| V\$GLI3_Q5_01  | GLI3                 | GLI3   | 0.0344213 | 2          |
| V\$CREM_Q6     | CREM                 | CREM   | 0.320594  | 2          |
| V\$MEIS1_01    | MEIS1                | MEIS1  | 0.295294  | 1          |
| V\$ELK1_01     | Elk-1                | ELK1   | 0.0671742 | 1          |
| V\$ATF3_Q6_01  | ATF-3                | ATF3   | 0.240844  | 1          |

hsa-mir-126

| Matrix_id      | transcription factor | Gene   | PCC        | Occurrence |
|----------------|----------------------|--------|------------|------------|
| V\$MAFB_01     | MAFB                 | MAFB   | 0.56019    | 13         |
| V\$SMAD4_Q6_01 | Smad4                | SMAD4  | 0.0696685  | 12         |
| V\$ELF1_Q6     | Elf-1                | ELF1   | 0.0377749  | 12         |
| V\$GKLF_Q4     | GKLF                 | KLF4   | 0.665474   | 12         |
| V\$P300_01     | p300                 | EP300  | 0.107642   | 11         |
| V\$GATA2_02    | GATA-2               | GATA2  | 0.41508    | 11         |
| V\$GATA3_02    | GATA-3               | GATA3  | 0.493125   | 11         |
| V\$GATA6_01    | GATA-6               | GATA6  | 0.33894    | 11         |
| V\$TBX5_02     | TBX5                 | TBX5   | 0.0657622  | 11         |
| V\$GATA1_05    | GATA-1               | GATA1  | 0.284604   | 11         |
| V\$AML1_Q6     | AML1                 | RUNX1  | 0.127943   | 11         |
| V\$GATA1_06    | GATA-1               | GATA1  | 0.284604   | 11         |
| V\$GATA1_02    | GATA-1               | GATA1  | 0.284604   | 11         |
| V\$GATA1_01    | GATA-1               | GATA1  | 0.284604   | 10         |
| V\$TBX5_01     | TBX5                 | TBX5   | 0.0657622  | 10         |
| V\$CETS1_Q6    | C-ets-1              | ETS1   | 0.10267    | 10         |
| V\$ETS2_Q6     | c-Ets-2              | ETS2   | 0.102418   | 10         |
| V\$ETS1_B      | c-Ets-1              | ETS1   | 0.10267    | 10         |
| V\$ETS2_B      | c-Ets-2              | ETS2   | 0.102418   | 10         |
| V\$YY1_Q6      | YY1                  | YY1    | 0.163781   | 9          |
| V\$YY1_Q6_02   | YY1                  | YY1    | 0.163781   | 8          |
| V\$FKLF_Q5     | FKLF                 | KLF11  | 0.37236    | 8          |
| V\$SPI1_Q5     | SPI1                 | SPI1   | 0.484517   | 8          |
| V\$TCF4_Q5     | TCF-4                | TCF7L2 | 0.444716   | 8          |
| V\$SREBP1_Q6   | SREBP-1              | SREBF1 | 0.10043    | 8          |
| V\$CP2_01      | CP2                  | TFCP2  | 0.149265   | 8          |
| V\$AP2ALPHA_Q6 | AP-2alpha            | TFAP2A | 0.537871   | 7          |
| V\$AHR_Q5      | AhR                  | AHR    | 0.66393    | 7          |
| V\$AML2_Q3     | AML2                 | RUNX3  | 0.251293   | 7          |
| V\$LRF_Q2      | LRF                  | ZBTB7A | 0.00379928 | 7          |
| V\$GATA1_04    | GATA-1               | GATA1  | 0.284604   | 7          |
| V\$IRF8_Q6     | IRF-8                | IRF8   | 0.124863   | 6          |
| V\$AML2_Q3_01  | AML2                 | RUNX3  | 0.251293   | 6          |
| V\$P53_02      | p53                  | TP53   | 0.222258   | 6          |
| V\$HMGYIY_01   | HMGYIY               | HMGA1  | 0.0370167  | 6          |
| V\$ARNT_01     | Arnt                 | ARNT   | 0.190972   | 6          |
| V\$GATA2_03    | GATA-2               | GATA2  | 0.41508    | 5          |
| V\$CEBPB_Q6    | C/EBPbeta            | CEBPB  | 0.665841   | 5          |
| V\$TCF4_01     | TCF-4                | TCF7L2 | 0.444716   | 5          |

|                |            |               |           |   |
|----------------|------------|---------------|-----------|---|
| V\$CEBPD_Q6    | C/EBPdelta | CEBPD         | 0.665534  | 5 |
| V\$AML1_Q1     | AML1a      | RUNX1         | 0.127943  | 5 |
| V\$SP1_Q2      | SP1        | SP1           | 0.244451  | 4 |
| V\$AP2ALPHA_Q1 | AP-2alpha  | TFAP2A        | 0.537871  | 4 |
| V\$SP1_Q6_Q1   | Sp1        | SP1           | 0.244451  | 4 |
| V\$DEC2_Q2     |            | 2-Dec BHLHE41 | 0.0638497 | 3 |
| V\$EAR2_Q2     | EAR2       | NR2F6         | 0.188304  | 3 |
| V\$AML1_Q4     | AML1       | RUNX1         | 0.127943  | 3 |
| V\$AP2ALPHA_Q2 | AP-2alphaA | TFAP2A        | 0.537871  | 3 |
| V\$IRF7_Q1     | IRF-7      | IRF7          | 0.639271  | 3 |
| V\$SREBP1_Q2   | SREBP-1    | SREBF1        | 0.10043   | 2 |
| V\$IRF1_Q6_Q1  | IRF-1      | IRF1          | 0.296333  | 2 |
| V\$AP2GAMMA_Q1 | AP-2gamma  | TFAP2C        | 0.478627  | 2 |
| V\$IRF7_Q3     | IRF-7      | IRF7          | 0.639271  | 1 |
| V\$IRF1_Q6     | IRF-1      | IRF1          | 0.296333  | 1 |

hsa-mir-127

| Matrix_id    | transcription factor | Gene  | PCC       | Occurrence |
|--------------|----------------------|-------|-----------|------------|
| V\$PUR1_Q4   | PUR1                 | PURA  | 0.0763966 | 44         |
| V\$MAFB_Q1   | MAFB                 | MAFB  | 0.0165872 | 42         |
| V\$GKLF_Q4   | GKLF                 | KLF4  | 0.0778385 | 42         |
| V\$PARP_Q4   | PARP                 | PARP1 | 0.159384  | 40         |
| V\$P300_Q1   | p300                 | EP300 | 0.0265468 | 39         |
| V\$PEA3_Q6   | PEA3                 | ETV4  | 0.0205414 | 38         |
| V\$TBP_Q6    | TBP                  | TBP   | 0.0671996 | 37         |
| V\$GATA6_Q1  | GATA-6               | GATA6 | 0.557475  | 35         |
| V\$GATA2_Q2  | GATA-2               | GATA2 | 0.0663594 | 35         |
| V\$GABPA_Q4  | GABP-alpha           | GABPA | 0.153042  | 33         |
| V\$MEF2C_Q4  | MEF-2C               | MEF2C | 0.150333  | 32         |
| V\$YY1_Q1    | YY1                  | YY1   | 0.205443  | 32         |
| V\$MAZ_Q6    | MAZ                  | MAZ   | 0.0153349 | 31         |
| V\$GATA3_Q2  | GATA-3               | GATA3 | 0.214396  | 31         |
| V\$GATA3_Q1  | GATA-3               | GATA3 | 0.214396  | 30         |
| V\$DLX5_Q1   | dlx5                 | DLX5  | 0.389742  | 27         |
| V\$GATA2_Q1  | GATA-2               | GATA2 | 0.0663594 | 27         |
| V\$PARP_Q3   | PARP                 | PARP1 | 0.159384  | 26         |
| V\$PBX1_Q3   | Pbx1                 | PBX1  | 0.263068  | 25         |
| V\$PBX1_Q4   | Pbx1                 | PBX1  | 0.263068  | 25         |
| V\$ING4_Q1   | ING4                 | ING4  | 0.0684935 | 23         |
| V\$GATA3_Q3  | GATA-3               | GATA3 | 0.214396  | 23         |
| V\$AHR_Q5    | AhR                  | AHR   | 0.207381  | 21         |
| V\$MAZ_Q6_Q1 | MAZ                  | MAZ   | 0.0153349 | 20         |

|                |           |              |           |    |
|----------------|-----------|--------------|-----------|----|
| V\$CDX1_01     | Cdx-1     | CDX1         | 0.0279134 | 18 |
| V\$TCF4_01     | TCF-4     | TCF7L2       | 0.0190837 | 18 |
| V\$FOXJ2_01    | FOXJ2     | FOXJ2        | 0.187553  | 17 |
| V\$PIT1_Q6     | Pit-1     | POU1F1       | 0.246501  | 17 |
| V\$GATA2_03    | GATA-2    | GATA2        | 0.0663594 | 15 |
| V\$GABPBETA_Q3 | GABP-beta | GABPB1       | 0.0872082 | 15 |
| V\$HNF6_Q6     | HNF6      | ONECUT1      | 0.325378  | 14 |
| V\$HBP1_Q2     | hbp1      | HBP1         | 0.234734  | 12 |
| V\$YY1_02      | YY1       | YY1          | 0.205443  | 12 |
| V\$HOX13_02    | HOXA5     | HOXA5        | 0.741616  | 11 |
| V\$MEIS1_01    | MEIS1     | MEIS1        | 0.244201  | 10 |
| V\$CIZ_01      | CIZ       | ZNF384       | 0.303459  | 10 |
| V\$ELK1_01     | Elk-1     | ELK1         | 0.26451   | 9  |
| V\$CART1_02    | CART1     | ALX1         | 0.0545584 | 9  |
| V\$OC2_Q3      | OC-2      | ONECUT2      | 0.0832852 | 9  |
| V\$RORA1_01    | RORalpha1 | RORA         | 0.45594   | 7  |
| V\$IRF2_01     | IRF-2     | IRF2         | 0.520216  | 7  |
| V\$OCT2_01     |           | 2-Oct POU2F2 | 0.0239429 | 5  |

hsa-mir-128-1

| Matrix_id     | transcription factor | Gene   | PCC       | Occurrence |
|---------------|----------------------|--------|-----------|------------|
| V\$PUR1_Q4    | PUR1                 | PURA   | 0.440977  | 368        |
| V\$IK_Q5      | Ikaros               | IKZF1  | 0.337253  | 364        |
| V\$PEA3_Q6    | PEA3                 | ETV4   | 0.0554766 | 352        |
| V\$PARP_Q4    | PARP                 | PARP1  | 0.619831  | 337        |
| V\$ZIC3_01    | Zic3                 | ZIC3   | 0.183524  | 335        |
| V\$MAFB_01    | MAFB                 | MAFB   | 0.0172242 | 334        |
| V\$AP2REP_01  | AP-2rep              | KLF12  | 0.161844  | 330        |
| V\$P300_01    | p300                 | EP300  | 0.170577  | 327        |
| V\$TBX5_02    | TBX5                 | TBX5   | 0.111103  | 301        |
| V\$CETS1_Q6   | C-ets-1              | ETS1   | 0.0953673 | 301        |
| V\$ETS2_Q6    | c-Ets-2              | ETS2   | 0.360013  | 300        |
| V\$MYB_Q6     | c-Myb                | MYB    | 0.378662  | 298        |
| V\$CMYB_Q5    | c-Myb                | MYB    | 0.378662  | 298        |
| V\$ETS1_B     | c-Ets-1              | ETS1   | 0.0953673 | 296        |
| V\$SOX9_Q4    | SOX9                 | SOX9   | 0.111326  | 295        |
| V\$NFAT4_Q3   | NF-AT4               | NFATC3 | 0.273329  | 291        |
| V\$TBP_Q6     | TBP                  | TBP    | 0.0438854 | 287        |
| V\$CDX2_Q5_02 | CDX-2                | CDX2   | 0.174017  | 287        |
| V\$GABPA_Q4   | GABP-alpha           | GABPA  | 0.19654   | 286        |
| V\$YY1_01     | YY1                  | YY1    | 0.224304  | 271        |
| V\$AP4_Q6_02  | AP-4                 | TFAP4  | 0.458864  | 270        |



|                |          |          |           |     |
|----------------|----------|----------|-----------|-----|
| V\$GR_Q6       | GR       | NR3C1    | 0.298956  | 268 |
| V\$BEN_01      | BEN      | GTF2IRD1 | 0.247748  | 261 |
| V\$AML1_Q6     | AML1     | RUNX1    | 0.112435  | 257 |
| V\$YY1_Q6      | YY1      | YY1      | 0.224304  | 250 |
| V\$MEF2C_Q4    | MEF-2C   | MEF2C    | 0.86629   | 250 |
| V\$YY1_Q6_02   | YY1      | YY1      | 0.224304  | 246 |
| V\$ETS2_B      | c-Ets-2  | ETS2     | 0.360013  | 246 |
| V\$SP1_Q6      | Sp1      | SP1      | 0.106283  | 242 |
| V\$SOX9_B1     | SOX9     | SOX9     | 0.111326  | 241 |
| V\$ZBP89_Q4    | ZBP89    | ZNF148   | 0.338395  | 239 |
| V\$DLX5_01     | dlx5     | DLX5     | 0.060424  | 235 |
| V\$TBX5_01     | TBX5     | TBX5     | 0.111103  | 233 |
| V\$CDX2_Q5_01  | Cdx-2    | CDX2     | 0.174017  | 231 |
| V\$IPF1_01     | IPF1     | PDX1     | 0.211926  | 228 |
| V\$SP1_Q6_01   | Sp1      | SP1      | 0.106283  | 227 |
| V\$SP1_01      | Sp1      | SP1      | 0.106283  | 223 |
| V\$NKX32_01    | Nkx3-2   | NKX3-2   | 0.178923  | 222 |
| V\$PARP_Q3     | PARP     | PARP1    | 0.619831  | 219 |
| V\$SP1_Q4_01   | Sp1      | SP1      | 0.106283  | 219 |
| V\$GATA1_05    | GATA-1   | GATA1    | 0.0203872 | 219 |
| V\$GATA1_06    | GATA-1   | GATA1    | 0.0203872 | 219 |
| V\$SP1_Q2_01   | Sp1      | SP1      | 0.106283  | 218 |
| V\$E47_02      | E47      | TCF3     | 0.161979  | 217 |
| V\$E12_Q6      | E12      | TCF3     | 0.161979  | 217 |
| V\$MYOD_Q6_01  | MyoD     | MYOD1    | 0.163917  | 217 |
| V\$E2A_Q6      | E2A      | TCF3     | 0.161979  | 217 |
| V\$ING4_01     | ING4     | ING4     | 0.709806  | 216 |
| V\$SP1_02      | SP1      | SP1      | 0.106283  | 212 |
| V\$IRF4_Q6     | IRF-4    | IRF4     | 0.169721  | 211 |
| V\$MYOGENIN_Q6 | myogenin | MYOG     | 0.160997  | 211 |
| V\$HMG1Y_01    | HMG1Y    | HMGA1    | 0.116398  | 201 |
| V\$TEL1_02     | TEL1     | ETV6     | 0.264841  | 200 |
| V\$ELK1_02     | Elk-1    | ELK1     | 0.260213  | 200 |
| V\$MAZ_Q6_01   | MAZ      | MAZ      | 0.236493  | 199 |
| V\$ARNT_01     | Arnt     | ARNT     | 0.100035  | 198 |
| V\$ETV3_02     | ETV3     | ETV3     | 0.020757  | 192 |
| V\$PBX1_Q3     | Pbx1     | PBX1     | 0.0630592 | 191 |
| V\$YY1_Q6_03   | YY1      | YY1      | 0.224304  | 185 |
| V\$CNOT3_01    | CNOT3    | CNOT3    | 0.115739  | 176 |
| V\$ELK1_06     | ELK-1    | ELK1     | 0.260213  | 174 |
| V\$CMYB_01     | c-Myb    | MYB      | 0.378662  | 174 |
| V\$ZFX_01      | Zfx      | ZFX      | 0.185787  | 173 |
| V\$E2A_Q2      | E2A      | TCF3     | 0.161979  | 173 |
| V\$LEF1_Q5     | LEF-1    | LEF1     | 0.341588  | 170 |
| V\$ETV7_01     | ETV7     | ETV7     | 0.209903  | 168 |
| V\$ERF_02      | ERF      | ERF      | 0.315025  | 160 |

|                |           |               |           |     |
|----------------|-----------|---------------|-----------|-----|
| V\$CREM_Q6     | CREM      | CREM          | 0.0642486 | 157 |
| V\$IRF8_Q6     | IRF-8     | IRF8          | 0.136582  | 156 |
| V\$SP2_01      | SP2       | SP2           | 0.253567  | 141 |
| V\$MYOD_Q6     | MyoD      | MYOD1         | 0.163917  | 136 |
| V\$E2F1_Q3     | E2F-1     | E2F1          | 0.230356  | 129 |
| V\$E47_01      | E47       | TCF3          | 0.161979  | 126 |
| V\$ATF1_Q6_01  | ATF-1     | ATF1          | 0.13103   | 124 |
| V\$GABPBETA_Q3 | GABP-beta | GABPB1        | 0.120451  | 122 |
| V\$NKX22_02    | NKX2B     | NKX2-2        | 0.852477  | 110 |
| V\$YY1_02      | YY1       | YY1           | 0.224304  | 104 |
| V\$E2F1_Q6     | E2F-1     | E2F1          | 0.230356  | 103 |
| V\$PET1_02     | Pet-1     | FEV           | 0.0264327 | 100 |
| V\$ERG_03      | ERG       | ERG           | 0.0659125 | 97  |
| V\$ELK1_01     | Elk-1     | ELK1          | 0.260213  | 92  |
| V\$ATF4_Q6     | ATF-4     | ATF4          | 0.361983  | 92  |
| V\$MYOD_01     | MyoD      | MYOD1         | 0.163917  | 91  |
| V\$CIZ_01      | CIZ       | ZNF384        | 0.0872695 | 89  |
| V\$ERM_02      | Erm       | ETV5          | 0.125972  | 89  |
| V\$BEN_02      | BEN       | GTF2IRD1      | 0.247748  | 82  |
| V\$P53_02      | p53       | TP53          | 0.0353976 | 80  |
| V\$ERG_01      | ERG       | ERG           | 0.0659125 | 80  |
| V\$SPIB_03     | Spi-B     | SPIB          | 0.0486756 | 77  |
| V\$DEC2_Q2     |           | 2-Dec BHLHE41 | 0.510249  | 71  |
| V\$YY1_03      | YY1       | YY1           | 0.224304  | 67  |
| V\$ATF2_Q5     | ATF-2     | ATF2          | 0.271434  | 66  |
| V\$SMAD4_Q6    | SMAD4     | SMAD4         | 0.101403  | 59  |
| V\$SAP1A_01    | SAP-1a    | ELK4          | 0.178852  | 56  |
| V\$STAT4_Q5    | STAT4     | STAT4         | 0.254948  | 55  |
| V\$SPIB_01     | SPI-B     | SPIB          | 0.0486756 | 54  |
| V\$FLI1_02     | Fli-1     | FLI1          | 0.15984   | 54  |
| V\$STAF_02     | Staf      | ZNF143        | 0.256526  | 50  |
| V\$RSRFC4_Q2   | RSRFC4    | MEF2A         | 0.591716  | 35  |
| V\$RSRFC4_01   | RSRFC4    | MEF2A         | 0.591716  | 34  |

hsa-mir-128-2

| Matrix_id    | transcription factor | Gene  | PCC       | Occurrence |
|--------------|----------------------|-------|-----------|------------|
| V\$PUR1_Q4   | PUR1                 | PURA  | 0.440977  | 368        |
| V\$IK_Q5     | Ikaros               | IKZF1 | 0.337253  | 364        |
| V\$PEA3_Q6   | PEA3                 | ETV4  | 0.0554766 | 352        |
| V\$PARP_Q4   | PARP                 | PARP1 | 0.619831  | 337        |
| V\$MAFB_01   | MAFB                 | MAFB  | 0.0172242 | 334        |
| V\$AP2REP_01 | AP-2rep              | KLF12 | 0.161844  | 330        |

|                |            |          |           |     |
|----------------|------------|----------|-----------|-----|
| V\$SMAD4_Q6_01 | Smad4      | SMAD4    | 0.101403  | 312 |
| V\$CETS1_Q6    | C-ets-1    | ETS1     | 0.0953673 | 301 |
| V\$TBX5_02     | TBX5       | TBX5     | 0.111103  | 301 |
| V\$ETS2_Q6     | c-Ets-2    | ETS2     | 0.360013  | 300 |
| V\$MYB_Q6      | c-Myb      | MYB      | 0.378662  | 298 |
| V\$CMYB_Q5     | c-Myb      | MYB      | 0.378662  | 298 |
| V\$ETS1_B      | c-Ets-1    | ETS1     | 0.0953673 | 296 |
| V\$SOX9_Q4     | SOX9       | SOX9     | 0.111326  | 295 |
| V\$CDX2_Q5_02  | CDX-2      | CDX2     | 0.174017  | 287 |
| V\$TBP_Q6      | TBP        | TBP      | 0.0438854 | 287 |
| V\$GABPA_Q4    | GABP-alpha | GABPA    | 0.19654   | 286 |
| V\$SMAD3_Q6_01 | Smad3      | SMAD3    | 0.241707  | 286 |
| V\$YY1_01      | YY1        | YY1      | 0.224304  | 271 |
| V\$AP4_Q6_02   | AP-4       | TFAP4    | 0.458864  | 270 |
| V\$GR_Q6       | GR         | NR3C1    | 0.298956  | 268 |
| V\$BEN_01      | BEN        | GTF2IRD1 | 0.247748  | 261 |
| V\$AML1_Q6     | AML1       | RUNX1    | 0.112435  | 257 |
| V\$MEF2C_Q4    | MEF-2C     | MEF2C    | 0.86629   | 250 |
| V\$YY1_Q6      | YY1        | YY1      | 0.224304  | 250 |
| V\$YY1_Q6_02   | YY1        | YY1      | 0.224304  | 246 |
| V\$ETS2_B      | c-Ets-2    | ETS2     | 0.360013  | 246 |
| V\$NANOG_02    | Nanog      | NANOG    | 0.173492  | 245 |
| V\$SOX9_B1     | SOX9       | SOX9     | 0.111326  | 241 |
| V\$GATA1_02    | GATA-1     | GATA1    | 0.0203872 | 240 |
| V\$DLX5_01     | dlx5       | DLX5     | 0.060424  | 235 |
| V\$TBX5_01     | TBX5       | TBX5     | 0.111103  | 233 |
| V\$CDX2_Q5_01  | Cdx-2      | CDX2     | 0.174017  | 231 |
| V\$IPF1_01     | IPF1       | PDX1     | 0.211926  | 228 |
| V\$SRY_02      | SRY        | SRY      | 0.305661  | 221 |
| V\$PARP_Q3     | PARP       | PARP1    | 0.619831  | 219 |
| V\$E12_Q6      | E12        | TCF3     | 0.161979  | 217 |
| V\$E47_02      | E47        | TCF3     | 0.161979  | 217 |
| V\$MYOD_Q6_01  | MyoD       | MYOD1    | 0.163917  | 217 |
| V\$E2A_Q6      | E2A        | TCF3     | 0.161979  | 217 |
| V\$ING4_01     | ING4       | ING4     | 0.709806  | 216 |
| V\$NFAT2_Q5    | NF-AT2     | NFATC1   | 0.143227  | 216 |
| V\$CDX2_01     | Cdx-2      | CDX2     | 0.174017  | 212 |
| V\$MYOGENIN_Q6 | myogenin   | MYOG     | 0.160997  | 211 |
| V\$IRF4_Q6     | IRF-4      | IRF4     | 0.169721  | 211 |
| V\$HNF3B_Q6    | HNF-3beta  | FOXA2    | 0.166871  | 205 |
| V\$GATA1_04    | GATA-1     | GATA1    | 0.0203872 | 204 |
| V\$FOXO3A_Q1   | FOXO3A     | FOXO3    | 0.259516  | 204 |
| V\$ELK1_02     | Elk-1      | ELK1     | 0.260213  | 200 |
| V\$TEL1_02     | TEL1       | ETV6     | 0.264841  | 200 |
| V\$MAZ_Q6_01   | MAZ        | MAZ      | 0.236493  | 199 |
| V\$ARNT_01     | Arnt       | ARNT     | 0.100035  | 198 |

|                   |            |               |           |     |
|-------------------|------------|---------------|-----------|-----|
| V\$PBX1_Q4        | Pbx1       | PBX1          | 0.0630592 | 193 |
| V\$ETV3_Q2        | ETV3       | ETV3          | 0.020757  | 192 |
| V\$PBX1_Q3        | Pbx1       | PBX1          | 0.0630592 | 191 |
| V\$AP4_Q5         | AP-4       | TFAP4         | 0.458864  | 185 |
| V\$YY1_Q6_Q3      | YY1        | YY1           | 0.224304  | 185 |
| V\$PITX3_Q2       | PITX3      | PITX3         | 0.192608  | 183 |
| V\$GFI1_Q6        | Gfi1       | GFI1          | 0.358669  | 177 |
| V\$AP4_Q6         | AP-4       | TFAP4         | 0.458864  | 175 |
| V\$CMYB_Q1        | c-Myb      | MYB           | 0.378662  | 174 |
| V\$ELK1_Q6        | ELK-1      | ELK1          | 0.260213  | 174 |
| V\$E2A_Q2         | E2A        | TCF3          | 0.161979  | 173 |
| V\$GFI1_Q6_Q1     | Gfi1       | GFI1          | 0.358669  | 168 |
| V\$HNF1_Q2        | HNF-1alpha | HNF1A         | 0.0554183 | 164 |
| V\$ERF_Q2         | ERF        | ERF           | 0.315025  | 160 |
| V\$MYOGENIN_Q6_Q1 | myogenin   | MYOG          | 0.160997  | 160 |
| V\$IRF8_Q6        | IRF-8      | IRF8          | 0.136582  | 156 |
| V\$FOXJ2_Q1       | FOXJ2      | FOXJ2         | 0.109748  | 154 |
| V\$FOXP3_Q1       | FOXP3      | FOXP3         | 0.184892  | 152 |
| V\$GFI1B_Q1       | Gfi1b      | GFI1B         | 0.173764  | 143 |
| V\$MYOD_Q6        | MyoD       | MYOD1         | 0.163917  | 136 |
| V\$NEUROD_Q2      | NeuroD     | NEUROD1       | 0.379829  | 136 |
| V\$BCL6_Q3_Q1     | Bcl-6      | BCL6          | 0.290989  | 129 |
| V\$E2F1_Q3        | E2F-1      | E2F1          | 0.230356  | 129 |
| V\$E47_Q1         | E47        | TCF3          | 0.161979  | 126 |
| V\$AML1_Q1        | AML1a      | RUNX1         | 0.112435  | 125 |
| V\$OC2_Q3         | OC-2       | ONECUT2       | 0.135491  | 125 |
| V\$DAX1_Q1        | Dax1       | NR0B1         | 0.0438224 | 125 |
| V\$ATF1_Q6_Q1     | ATF-1      | ATF1          | 0.13103   | 124 |
| V\$FAC1_Q1        | FAC1       | BPTF          | 0.217786  | 112 |
| V\$AML1_Q4        | AML1       | RUNX1         | 0.112435  | 111 |
| V\$MEF2A_Q6       | mef2A      | MEF2A         | 0.591716  | 110 |
| V\$DBP_Q6_Q1      | DBP        | DBP           | 0.47676   | 108 |
| V\$LHX3b_Q1       | LHX3b      | LHX3          | 0.22777   | 108 |
| V\$HOXD9_Q2       | Hoxd9      | HOXD9         | 0.0117175 | 107 |
| V\$MYOD_Q1        | MyoD       | MYOD1         | 0.163917  | 91  |
| V\$CIZ_Q1         | CIZ        | ZNF384        | 0.0872695 | 89  |
| V\$HTF4_Q2        | HTF4       | TCF12         | 0.26246   | 85  |
| V\$HOXB8_Q1       | HOXB8      | HOXB8         | 0.420728  | 79  |
| V\$NCX_Q2         | Ncx        | TLX2          | 0.219675  | 79  |
| V\$DEC2_Q2        |            | 2-Dec BHLHE41 | 0.510249  | 71  |
| V\$E2F1_Q4        | E2F-1      | E2F1          | 0.230356  | 63  |
| V\$FOXJ2_Q2       | FOXJ2      | FOXJ2         | 0.109748  | 62  |
| V\$SPIB_Q1        | SPI-B      | SPIB          | 0.0486756 | 54  |

---

hsa-mir-129-1

| Matrix_id           | transcription factor | Gene    | PCC       | Occurrence |
|---------------------|----------------------|---------|-----------|------------|
| V\$PUR1_Q4          | PUR1                 | PURA    | 0.389458  | 495        |
| V\$MAFB_01          | MAFB                 | MAFB    | 0.133513  | 457        |
| V\$PARP_Q4          | PARP                 | PARP1   | 0.448735  | 453        |
| V\$ZIC3_01          | Zic3                 | ZIC3    | 0.248691  | 450        |
| V\$SOX9_Q4          | SOX9                 | SOX9    | 0.331727  | 395        |
| V\$AP4_Q6_02        | AP-4                 | TFAP4   | 0.414392  | 368        |
| V\$MAZ_Q6           | MAZ                  | MAZ     | 0.277827  | 366        |
| V\$GR_Q6            | GR                   | NR3C1   | 0.0290927 | 354        |
| V\$MEF2C_Q4         | MEF-2C               | MEF2C   | 0.801687  | 351        |
| V\$YY1_Q6           | YY1                  | YY1     | 0.120808  | 337        |
| V\$YY1_Q6_02        | YY1                  | YY1     | 0.120808  | 335        |
| V\$SOX9_B1          | SOX9                 | SOX9    | 0.331727  | 329        |
| V\$DLX5_01          | dlx5                 | DLX5    | 0.0483772 | 329        |
| V\$ZBP89_Q4         | ZBP89                | ZNF148  | 0.102069  | 295        |
| V\$TFII_Q6          | TFII-I               | GTF2I   | 0.234131  | 290        |
| V\$HNF3B_Q6         | HNF-3beta            | FOXA2   | 0.0752312 | 278        |
| V\$ELK1_02          | Elk-1                | ELK1    | 0.146971  | 275        |
| V\$MAZ_Q6_01        | MAZ                  | MAZ     | 0.277827  | 259        |
| V\$YY1_Q6_03        | YY1                  | YY1     | 0.120808  | 255        |
| V\$AP4_Q5           | AP-4                 | TFAP4   | 0.414392  | 255        |
| V\$ELK1_06          | ELK-1                | ELK1    | 0.146971  | 239        |
| V\$AP4_Q6           | AP-4                 | TFAP4   | 0.414392  | 231        |
| V\$KLF15_Q2         | KLF15                | KLF15   | 0.0194347 | 221        |
| V\$SREBP1_Q6        | SREBP-1              | SREBF1  | 0.0369535 | 218        |
| V\$CREM_Q6          | CREM                 | CREM    | 0.0948141 | 215        |
| V\$SOX10_Q6         | SOX10                | SOX10   | 0.722931  | 209        |
| V\$GR_01            | GR                   | NR3C1   | 0.0290927 | 205        |
| V\$E2F1_Q3_01       | E2F-1                | E2F1    | 0.197641  | 184        |
| V\$E2F1_Q3          | E2F-1                | E2F1    | 0.197641  | 184        |
| V\$CP2_01           | CP2                  | TFCP2   | 0.233849  | 181        |
| V\$NEUROD_02        | NeuroD               | NEUROD1 | 0.0885898 | 177        |
| V\$ZIC1_01          | Zic1                 | ZIC1    | 0.945802  | 175        |
| V\$LHX3b_01         | LHX3b                | LHX3    | 0.0408343 | 149        |
| V\$MEF2A_Q6         | mef2A                | MEF2A   | 0.658035  | 148        |
| V\$E2F1_Q6          | E2F-1                | E2F1    | 0.197641  | 145        |
| V\$CACCCBINDINGFACT | CACCC-binding factor | ZNF148  | 0.102069  | 120        |
| V\$ATF4_Q6          | ATF-4                | ATF4    | 0.0734864 | 117        |
| V\$ATF2_Q5          | ATF-2                | ATF2    | 0.0329958 | 83         |
| V\$E2F1_Q4          | E2F-1                | E2F1    | 0.197641  | 83         |
| V\$RORBETA_Q2       | RORBETA              | RORB    | 0.323883  | 79         |
| V\$ZID_01           | ZID                  | ZBTB6   | 0.0774791 | 45         |

hsa-mir-129-2

| Matrix_id     | transcription factor | Gene   | PCC        | Occurrence |
|---------------|----------------------|--------|------------|------------|
| V\$PUR1_Q4    | PUR1                 | PURA   | 0.389458   | 495        |
| V\$MAFB_Q1    | MAFB                 | MAFB   | 0.133513   | 457        |
| V\$ZIC3_Q1    | Zic3                 | ZIC3   | 0.248691   | 450        |
| V\$ETS2_Q6    | c-Ets-2              | ETS2   | 0.163768   | 405        |
| V\$GABPA_Q4   | GABP-alpha           | GABPA  | 0.144381   | 396        |
| V\$SOX9_Q4    | SOX9                 | SOX9   | 0.331727   | 395        |
| V\$TBP_Q6     | TBP                  | TBP    | 0.137566   | 393        |
| V\$MAZ_Q6     | MAZ                  | MAZ    | 0.277827   | 366        |
| V\$YY1_Q1     | YY1                  | YY1    | 0.120808   | 364        |
| V\$MEF2C_Q4   | MEF-2C               | MEF2C  | 0.801687   | 351        |
| V\$YY1_Q6     | YY1                  | YY1    | 0.120808   | 337        |
| V\$DLX5_Q1    | dlx5                 | DLX5   | 0.0483772  | 329        |
| V\$SOX9_B1    | SOX9                 | SOX9   | 0.331727   | 329        |
| V\$SRX_Q2     | SRX                  | SRX    | 0.197346   | 299        |
| V\$ZBP89_Q4   | ZBP89                | ZNF148 | 0.102069   | 295        |
| V\$ING4_Q1    | ING4                 | ING4   | 0.706475   | 294        |
| V\$TFII_Q6    | TFII-I               | GTF2I  | 0.234131   | 290        |
| V\$PARP_Q3    | PARP                 | PARP1  | 0.448735   | 289        |
| V\$HNF3B_Q6   | HNF-3beta            | FOXA2  | 0.0752312  | 278        |
| V\$ELK1_Q2    | Elk-1                | ELK1   | 0.146971   | 275        |
| V\$FOXO3A_Q1  | FOXO3A               | FOXO3  | 0.0434161  | 269        |
| V\$HMGY_Q1    | HMGY                 | HMGA1  | 0.00635564 | 267        |
| V\$HIF1A_Q6   | HIF-1alpha           | HIF1A  | 0.00104194 | 255        |
| V\$ELK1_Q6    | ELK-1                | ELK1   | 0.146971   | 239        |
| V\$SREBP1_Q6  | SREBP-1              | SREBF1 | 0.0369535  | 218        |
| V\$CREM_Q6    | CREM                 | CREM   | 0.0948141  | 215        |
| V\$ERF_Q2     | ERF                  | ERF    | 0.242571   | 214        |
| V\$SOX10_Q6   | SOX10                | SOX10  | 0.722931   | 209        |
| V\$E2F1_Q3_Q1 | E2F-1                | E2F1   | 0.197641   | 184        |
| V\$ZIC1_Q1    | Zic1                 | ZIC1   | 0.945802   | 175        |
| V\$SP4_Q5     | SP4                  | SP4    | 0.0514432  | 165        |
| V\$MSX1_Q1    | Msx-1                | MSX1   | 0.1602     | 120        |
| V\$ATF4_Q6    | ATF-4                | ATF4   | 0.0734864  | 117        |
| V\$PAX3_B     | Pax-3                | PAX3   | 0.0532104  | 103        |
| V\$USF2_Q6    | USF2                 | USF2   | 0.320827   | 85         |
| V\$E2F1_Q4    | E2F-1                | E2F1   | 0.197641   | 83         |
| V\$MAX_Q1     | Max                  | MAX    | 0.541682   | 82         |
| V\$EGR2_Q1    | Egr-2                | EGR2   | 0.260654   | 80         |
| V\$SOX2_Q6    | SOX2                 | SOX2   | 0.535576   | 79         |
| V\$CTCF_Q2    | CTCF                 | CTCF   | 0.415948   | 55         |

|            |      |      |          |    |
|------------|------|------|----------|----|
| V\$CTCF_01 | CTCF | CTCF | 0.415948 | 54 |
|------------|------|------|----------|----|

hsa-mir-130a

| Matrix_id      | transcription factor | Gene   | PCC        | Occurrence |
|----------------|----------------------|--------|------------|------------|
| V\$PUR1_Q4     | PUR1                 | PURA   | 0.116355   | 206        |
| V\$GKLF_Q4     | GKLF                 | KLF4   | 0.560999   | 197        |
| V\$ELF1_Q6     | Elf-1                | ELF1   | 0.164572   | 196        |
| V\$MAFB_01     | MAFB                 | MAFB   | 0.269534   | 188        |
| V\$P300_01     | p300                 | EP300  | 0.246139   | 184        |
| V\$SMAD4_Q6_01 | Smad4                | SMAD4  | 0.223118   | 172        |
| V\$GABPA_Q4    | GABP-alpha           | GABPA  | 0.279315   | 169        |
| V\$YY1_01      | YY1                  | YY1    | 0.29121    | 153        |
| V\$TBP_Q6      | TBP                  | TBP    | 0.0611908  | 151        |
| V\$YY1_Q6_02   | YY1                  | YY1    | 0.29121    | 142        |
| V\$YY1_Q6      | YY1                  | YY1    | 0.29121    | 141        |
| V\$DLX5_01     | dlx5                 | DLX5   | 0.620126   | 136        |
| V\$AHR_Q5      | AhR                  | AHR    | 0.910479   | 129        |
| V\$AP2ALPHA_Q6 | AP-2alpha            | TFAP2A | 0.887202   | 121        |
| V\$WT1_Q6      | WT1                  | WT1    | 0.0167677  | 117        |
| V\$TFIIQ6      | TFII-I               | GTF2I  | 0.0195905  | 116        |
| V\$AP2ALPHA_01 | AP-2alpha            | TFAP2A | 0.887202   | 112        |
| V\$GATA3_01    | GATA-3               | GATA3  | 0.868185   | 111        |
| V\$SREBP1_Q6   | SREBP-1              | SREBF1 | 0.139465   | 105        |
| V\$ARNT_01     | Arnt                 | ARNT   | 0.26003    | 101        |
| V\$GATA2_01    | GATA-2               | GATA2  | 0.623351   | 100        |
| V\$SP1_01      | Sp1                  | SP1    | 0.239241   | 100        |
| V\$WT1_Q6_01   | WT1                  | WT1    | 0.0167677  | 95         |
| V\$TCF4_Q5     | TCF-4                | TCF7L2 | 0.496404   | 87         |
| V\$PITX2_Q2    | Pitx2                | PITX2  | 0.32663    | 83         |
| V\$CREM_Q6     | CREM                 | CREM   | 0.0977584  | 78         |
| V\$PITX2_01    | PITX2                | PITX2  | 0.32663    | 77         |
| V\$GABPBETA_Q3 | GABP-beta            | GABPB1 | 0.153194   | 77         |
| V\$ESE1_Q3     | ESE-1                | ELF3   | 0.195519   | 74         |
| V\$GATA3_03    | GATA-3               | GATA3  | 0.868185   | 72         |
| V\$SP2_01      | SP2                  | SP2    | 0.0862784  | 71         |
| V\$CEBPD_Q6    | C/EBPdelta           | CEBPD  | 0.417084   | 69         |
| V\$CEBPB_02    | C/EBPbeta            | CEBPB  | 0.526739   | 66         |
| V\$STAT3_03    | STAT3                | STAT3  | 0.176632   | 62         |
| V\$CEBPB_Q6    | C/EBPbeta            | CEBPB  | 0.526739   | 54         |
| V\$ATF1_Q6_01  | ATF-1                | ATF1   | 0.00417839 | 53         |
| V\$SP3_Q3      | Sp3                  | SP3    | 0.380046   | 29         |
| V\$AP2ALPHA_02 | AP-2alphaA           | TFAP2A | 0.887202   | 28         |

|            |      |      |         |    |
|------------|------|------|---------|----|
| V\$GLI3_02 | GLI3 | GLI3 | 0.23356 | 16 |
| V\$GLI3_01 | GLI3 | GLI3 | 0.23356 | 14 |

hsa-mir-130b

| Matrix_id      | transcription factor | Gene   | PCC       | Occurrence |
|----------------|----------------------|--------|-----------|------------|
| V\$PITX2_01    | PITX2                | PITX2  | 0.230026  | 3          |
| V\$MAFB_01     | MAFB                 | MAFB   | 0.0274179 | 3          |
| V\$YY1_Q6_02   | YY1                  | YY1    | 0.0372295 | 3          |
| V\$PUR1_Q4     | PUR1                 | PURA   | 0.0158336 | 3          |
| V\$YY1_Q6      | YY1                  | YY1    | 0.0372295 | 3          |
| V\$ELF1_Q6     | Elf-1                | ELF1   | 0.156631  | 3          |
| V\$GKLF_Q4     | GKLF                 | KLF4   | 0.190808  | 3          |
| V\$PITX2_Q2    | Pitx2                | PITX2  | 0.230026  | 3          |
| V\$AP2ALPHA_Q6 | AP-2alpha            | TFAP2A | 0.609786  | 3          |
| V\$CEBPB_02    | C/EBPbeta            | CEBPB  | 0.273995  | 3          |
| V\$AP2GAMMA_01 | AP-2gamma            | TFAP2C | 0.490835  | 2          |
| V\$P300_01     | p300                 | EP300  | 0.0373138 | 2          |
| V\$ESE1_Q3     | ESE-1                | ELF3   | 0.191992  | 2          |
| V\$HMGY1_Q1    | HMGY1                | HMGY1  | 0.22093   | 2          |
| V\$YY1_Q6_03   | YY1                  | YY1    | 0.0372295 | 2          |
| V\$GABPA_Q4    | GABPA-alpha          | GABPA  | 0.238255  | 2          |
| V\$TCF4_Q1     | TCF-4                | TCF7L2 | 0.10522   | 2          |
| V\$AHR_Q5      | AhR                  | AHR    | 0.638405  | 2          |
| V\$ARNT_Q1     | Arnt                 | ARNT   | 0.0193809 | 2          |
| V\$TCF4_Q5     | TCF-4                | TCF7L2 | 0.10522   | 2          |
| V\$AP2ALPHA_Q1 | AP-2alpha            | TFAP2A | 0.609786  | 2          |
| V\$SP1_Q1      | Sp1                  | SP1    | 0.0798378 | 1          |
| V\$SP1_Q2      | SP1                  | SP1    | 0.0798378 | 1          |
| V\$RNF96_Q1    | RNF96                | TRIM28 | 0.139409  | 1          |
| V\$SP1_Q2_Q1   | Sp1                  | SP1    | 0.0798378 | 1          |
| V\$SP1_Q4_Q1   | Sp1                  | SP1    | 0.0798378 | 1          |
| V\$SP1_Q6_Q1   | Sp1                  | SP1    | 0.0798378 | 1          |
| V\$SP3_Q3      | Sp3                  | SP3    | 0.229309  | 1          |
| V\$SP1_Q6      | Sp1                  | SP1    | 0.0798378 | 1          |
| V\$ZID_Q1      | ZID                  | ZBTB6  | 0.0229121 | 1          |
| V\$ESE1_Q2     | ESE-1                | ELF3   | 0.191992  | 1          |

hsa-mir-132

| Matrix_id | transcription factor | Gene | PCC | Occurrence |
|-----------|----------------------|------|-----|------------|
|-----------|----------------------|------|-----|------------|



|                     |                      |         |            |     |
|---------------------|----------------------|---------|------------|-----|
| V\$PUR1_Q4          | PUR1                 | PURA    | 0.384592   | 420 |
| V\$MAFB_01          | MAFB                 | MAFB    | 0.0436043  | 387 |
| V\$PARP_Q4          | PARP                 | PARP1   | 0.389398   | 387 |
| V\$ZIC3_01          | Zic3                 | ZIC3    | 0.219049   | 382 |
| V\$ETS2_Q6          | c-Ets-2              | ETS2    | 0.0817771  | 343 |
| V\$GABPA_Q4         | GABP-alpha           | GABPA   | 0.0552729  | 337 |
| V\$TBP_Q6           | TBP                  | TBP     | 0.0880895  | 336 |
| V\$SOX9_Q4          | SOX9                 | SOX9    | 0.284964   | 329 |
| V\$MAZ_Q6           | MAZ                  | MAZ     | 0.246073   | 308 |
| V\$AP4_Q6_02        | AP-4                 | TFAP4   | 0.357839   | 308 |
| V\$GR_Q6            | GR                   | NR3C1   | 0.0149042  | 307 |
| V\$YY1_01           | YY1                  | YY1     | 0.1231     | 306 |
| V\$HNF4A_Q6_01      | HNF-4alpha           | HNF4A   | 0.0513668  | 292 |
| V\$DLX5_01          | dlx5                 | DLX5    | 0.041707   | 287 |
| V\$YY1_Q6           | YY1                  | YY1     | 0.1231     | 283 |
| V\$ETS2_B           | c-Ets-2              | ETS2    | 0.0817771  | 282 |
| V\$YY1_Q6_02        | YY1                  | YY1     | 0.1231     | 282 |
| V\$SOX9_B1          | SOX9                 | SOX9    | 0.284964   | 281 |
| V\$GATA6_01         | GATA-6               | GATA6   | 0.0744763  | 261 |
| V\$SRY_02           | SRY                  | SRY     | 0.107058   | 257 |
| V\$ZBP89_Q4         | ZBP89                | ZNF148  | 0.0759542  | 249 |
| V\$ING4_01          | ING4                 | ING4    | 0.606537   | 248 |
| V\$ELK1_02          | Elk-1                | ELK1    | 0.20784    | 231 |
| V\$MAZ_Q6_01        | MAZ                  | MAZ     | 0.246073   | 215 |
| V\$AP4_Q5           | AP-4                 | TFAP4   | 0.357839   | 215 |
| V\$YY1_Q6_03        | YY1                  | YY1     | 0.1231     | 212 |
| V\$ELK1_06          | ELK-1                | ELK1    | 0.20784    | 204 |
| V\$AP4_Q6           | AP-4                 | TFAP4   | 0.357839   | 197 |
| V\$ERF_02           | ERF                  | ERF     | 0.147416   | 185 |
| V\$GR_01            | GR                   | NR3C1   | 0.0149042  | 184 |
| V\$CREM_Q6          | CREM                 | CREM    | 0.199121   | 178 |
| V\$SP2_01           | SP2                  | SP2     | 0.0968112  | 165 |
| V\$CP2_01           | CP2                  | TFCP2   | 0.263042   | 157 |
| V\$NEUROD_02        | NeuroD               | NEUROD1 | 0.01718    | 150 |
| V\$ZIC1_01          | Zic1                 | ZIC1    | 0.878687   | 144 |
| V\$GABPBETA_Q3      | GABP-beta            | GABPB1  | 0.00593285 | 142 |
| V\$AP4_Q6_01        | AP-4                 | TFAP4   | 0.357839   | 139 |
| V\$YY1_02           | YY1                  | YY1     | 0.1231     | 122 |
| V\$CACCCBINDINGFACT | CACCC-binding factor | ZNF148  | 0.0759542  | 108 |
| V\$ERM_02           | Erm                  | ETV5    | 0.276381   | 102 |
| V\$MSX1_01          | Msx-1                | MSX1    | 0.170961   | 102 |
| V\$ELK1_04          | Elk-1                | ELK1    | 0.20784    | 16  |
| V\$ELK1_03          | Elk-1                | ELK1    | 0.20784    | 9   |

hsa-mir-133a-1

| Matrix_id      | transcription factor | Gene   | PCC       | Occurrence |
|----------------|----------------------|--------|-----------|------------|
| V\$IK_Q5       | Ikaros               | IKZF1  | 0.781805  | 2498       |
| V\$PARP_Q4     | PARP                 | PARP1  | 0.634708  | 2446       |
| V\$PEA3_Q6     | PEA3                 | ETV4   | 0.794138  | 2424       |
| V\$AP2REP_01   | AP-2rep              | KLF12  | 0.913247  | 2397       |
| V\$P300_01     | p300                 | EP300  | 0.768497  | 2358       |
| V\$ZIC3_01     | Zic3                 | ZIC3   | 0.413491  | 2195       |
| V\$SMAD4_Q6_01 | Smad4                | SMAD4  | 0.719688  | 2177       |
| V\$CMYB_Q5     | c-Myb                | MYB    | 0.278121  | 2152       |
| V\$MYB_Q6      | c-Myb                | MYB    | 0.278121  | 2152       |
| V\$CDX2_Q5_02  | CDX-2                | CDX2   | 0.884664  | 2108       |
| V\$TBP_Q6      | TBP                  | TBP    | 0.310926  | 2108       |
| V\$TBX5_02     | TBX5                 | TBX5   | 0.916782  | 2092       |
| V\$CETS1_Q6    | C-ets-1              | ETS1   | 0.576544  | 2086       |
| V\$NFAT4_Q3    | NF-AT4               | NFATC3 | 0.540865  | 2084       |
| V\$NR1B2_Q6    | NR1B2                | RARB   | 0.80578   | 2057       |
| V\$GATA1_01    | GATA-1               | GATA1  | 0.637845  | 2053       |
| V\$TTF1_Q5     | TTF-1                | NKX2-1 | 0.232646  | 2046       |
| V\$ETS1_B      | c-Ets-1              | ETS1   | 0.576544  | 2045       |
| V\$ETS2_Q6     | c-Ets-2              | ETS2   | 0.672813  | 2009       |
| V\$GABPA_Q4    | GABP-alpha           | GABPA  | 0.382255  | 1986       |
| V\$YY1_01      | YY1                  | YY1    | 0.288409  | 1969       |
| V\$SMAD3_Q6_01 | Smad3                | SMAD3  | 0.819455  | 1957       |
| V\$MEF2C_Q4    | MEF-2C               | MEF2C  | 0.43874   | 1940       |
| V\$Elf5_Q3     | ELF5                 | ELF5   | 0.13696   | 1919       |
| V\$GR_Q6       | GR                   | NR3C1  | 0.650298  | 1909       |
| V\$DLX5_01     | dlx5                 | DLX5   | 0.132943  | 1886       |
| V\$NANOG_02    | Nanog                | NANOG  | 0.917603  | 1871       |
| V\$AML1_Q6     | AML1                 | RUNX1  | 0.786352  | 1821       |
| V\$IPF1_01     | IPF1                 | PDX1   | 0.95749   | 1817       |
| V\$SOX5_01     | SOX5                 | SOX5   | 0.547572  | 1812       |
| V\$HNF4A_Q6_01 | HNF-4alpha           | HNF4A  | 0.309515  | 1809       |
| V\$YY1_Q6      | YY1                  | YY1    | 0.288409  | 1796       |
| V\$GATA1_02    | GATA-1               | GATA1  | 0.637845  | 1774       |
| V\$ETS2_B      | c-Ets-2              | ETS2   | 0.672813  | 1770       |
| V\$AP4_Q6_02   | AP-4                 | TFAP4  | 0.612706  | 1741       |
| V\$SPI1_Q5     | SPI1                 | SPI1   | 0.221832  | 1733       |
| V\$GATA6_01    | GATA-6               | GATA6  | 0.0143678 | 1727       |
| V\$GATA2_02    | GATA-2               | GATA2  | 0.373527  | 1727       |
| V\$GATA1_06    | GATA-1               | GATA1  | 0.637845  | 1727       |
| V\$GATA1_05    | GATA-1               | GATA1  | 0.637845  | 1727       |
| V\$IPF1_Q6     | IPF1                 | PDX1   | 0.95749   | 1717       |

|               |            |         |           |      |
|---------------|------------|---------|-----------|------|
| V\$TBX5_01    | TBX5       | TBX5    | 0.916782  | 1705 |
| V\$IPF1_Q4_01 | IPF1       | PDX1    | 0.95749   | 1654 |
| V\$CDX2_Q5_01 | Cdx-2      | CDX2    | 0.884664  | 1653 |
| V\$SRY_02     | SRY        | SRY     | 0.671164  | 1628 |
| V\$CDX2_01    | Cdx-2      | CDX2    | 0.884664  | 1574 |
| V\$MAZ_Q6     | MAZ        | MAZ     | 0.288488  | 1564 |
| V\$PARP_Q3    | PARP       | PARP1   | 0.634708  | 1550 |
| V\$FOXO3A_Q1  | FOXO3A     | FOXO3   | 0.599381  | 1539 |
| V\$LRF_Q2     | LRF        | ZBTB7A  | 0.881985  | 1539 |
| V\$NFAT2_Q5   | NF-AT2     | NFATC1  | 0.938323  | 1536 |
| V\$IRF4_Q6    | IRF-4      | IRF4    | 0.914376  | 1507 |
| V\$E2A_Q6     | E2A        | TCF3    | 0.793331  | 1504 |
| V\$E12_Q6     | E12        | TCF3    | 0.793331  | 1503 |
| V\$HNF3B_Q6   | HNF-3beta  | FOXA2   | 0.51566   | 1501 |
| V\$E47_02     | E47        | TCF3    | 0.793331  | 1496 |
| V\$MYOD_Q6_01 | MyoD       | MYOD1   | 0.83508   | 1493 |
| V\$ING4_01    | ING4       | ING4    | 0.0842627 | 1485 |
| V\$GATA1_04   | GATA-1     | GATA1   | 0.637845  | 1482 |
| V\$TEL1_02    | TEL1       | ETV6    | 0.929123  | 1449 |
| V\$ELK1_02    | Elk-1      | ELK1    | 0.727822  | 1444 |
| V\$HNF3A_01   | HNF3A      | FOXA1   | 0.455722  | 1427 |
| V\$ETV3_02    | ETV3       | ETV3    | 0.616466  | 1403 |
| V\$IPF1_Q4    | IPF1       | PDX1    | 0.95749   | 1387 |
| V\$ER71_02    | ER71       | ETV2    | 0.597756  | 1380 |
| V\$ZBP89_Q4   | ZBP89      | ZNF148  | 0.768483  | 1311 |
| V\$ELK1_06    | ELK-1      | ELK1    | 0.727822  | 1308 |
| V\$GFI1_Q6    | Gfi1       | GFI1    | 0.399122  | 1296 |
| V\$TCF3_01    | TCF-3      | TCF7L1  | 0.706001  | 1290 |
| V\$ARNT_01    | Arnt       | ARNT    | 0.840299  | 1287 |
| V\$HNF1_02    | HNF-1alpha | HNF1A   | 0.797891  | 1271 |
| V\$GFI1_Q6_01 | Gfi1       | GFI1    | 0.399122  | 1270 |
| V\$FOXJ2_01   | FOXJ2      | FOXJ2   | 0.743163  | 1262 |
| V\$GATA2_01   | GATA-2     | GATA2   | 0.373527  | 1250 |
| V\$CEBPE_Q6   | CEBPE      | CEBPE   | 0.452175  | 1233 |
| V\$SOX10_Q6   | SOX10      | SOX10   | 0.421981  | 1222 |
| V\$AP4_Q5     | AP-4       | TFAP4   | 0.612706  | 1216 |
| V\$FOXM1_01   | FOXM1      | FOXM1   | 0.209204  | 1208 |
| V\$FOXP3_01   | FOXP3      | FOXP3   | 0.873354  | 1198 |
| V\$CMYB_01    | c-Myb      | MYB     | 0.278121  | 1183 |
| V\$ERF_02     | ERF        | ERF     | 0.539968  | 1166 |
| V\$RFX1_02    | RFX1       | RFX1    | 0.929992  | 1152 |
| V\$OC2_Q3     | OC-2       | ONECUT2 | 0.832897  | 1125 |
| V\$RFX1_01    | RFX1       | RFX1    | 0.929992  | 1084 |
| V\$GFI1B_01   | Gfi1b      | GFI1B   | 0.932811  | 1083 |
| V\$AML1_01    | AML1a      | RUNX1   | 0.786352  | 1075 |
| V\$AML1_Q4    | AML1       | RUNX1   | 0.786352  | 975  |

|               |            |        |          |     |
|---------------|------------|--------|----------|-----|
| V\$BCL6_Q3_01 | Bcl-6      | BCL6   | 0.914351 | 962 |
| V\$FAC1_01    | FAC1       | BPTF   | 0.23267  | 940 |
| V\$E47_01     | E47        | TCF3   | 0.793331 | 931 |
| V\$HOXA9_01   | hoxa9      | HOXA9  | 0.567369 | 929 |
| V\$CEBPB_02   | C/EBPbeta  | CEBPB  | 0.224992 | 925 |
| V\$NKX2B_Q3   | NKX2B      | NKX2-2 | 0.268141 | 922 |
| V\$CEBPD_Q6   | C/EBPdelta | CEBPD  | 0.188505 | 919 |
| V\$NKX22_02   | NKX2B      | NKX2-2 | 0.268141 | 906 |
| V\$CDX1_01    | Cdx-1      | CDX1   | 0.623226 | 877 |
| V\$LHX3b_01   | LHX3b      | LHX3   | 0.889692 | 839 |
| V\$PAX8_01    | Pax-8      | PAX8   | 0.276466 | 832 |
| V\$CEBPB_Q6   | C/EBPbeta  | CEBPB  | 0.224992 | 792 |
| V\$AML2_01    | AML2       | RUNX3  | 0.523476 | 752 |
| V\$MSX1_01    | Msx-1      | MSX1   | 0.557727 | 749 |
| V\$NCX_02     | Ncx        | TLX2   | 0.898704 | 714 |
| V\$CART1_02   | CART1      | ALX1   | 0.856029 | 671 |
| V\$CDX2_Q5    | Cdx-2      | CDX2   | 0.884664 | 649 |
| V\$HOX13_02   | HOXA5      | HOXA5  | 0.027899 | 630 |
| V\$IPF1_06    | ipf1       | PDX1   | 0.95749  | 609 |
| V\$HOXB8_01   | HOXB8      | HOXB8  | 0.504901 | 600 |
| V\$IPF1_03    | IPF1       | PDX1   | 0.95749  | 574 |
| V\$LHX3_01    | Lhx3       | LHX3   | 0.889692 | 449 |
| V\$PAX3_B     | Pax-3      | PAX3   | 0.670896 | 403 |
| V\$CEBPB_01   | C/EBPbeta  | CEBPB  | 0.224992 | 391 |
| V\$HNF1B_01   | HNF-1beta  | HNF1B  | 0.445795 | 377 |
| V\$HOXA7_01   | HOXA7      | HOXA7  | 0.282853 | 240 |
| V\$RSRFC4_Q2  | RSRFC4     | MEF2A  | 0.10651  | 228 |
| V\$RSRFC4_01  | RSRFC4     | MEF2A  | 0.10651  | 197 |
| V\$LHX3A_01   | Lhx3a      | LHX3   | 0.889692 | 98  |
| V\$AFP1_Q6    | AFP1       | ZFH3   | 0.328241 | 79  |

hsa-mir-133a-2

| Matrix_id      | transcription factor | Gene  | PCC      | Occurrence |
|----------------|----------------------|-------|----------|------------|
| V\$PUR1_Q4     | PUR1                 | PURA  | 0.356652 | 2546       |
| V\$IK_Q5       | Ikaros               | IKZF1 | 0.781805 | 2498       |
| V\$PEA3_Q6     | PEA3                 | ETV4  | 0.794138 | 2424       |
| V\$AP2REP_01   | AP-2rep              | KLF12 | 0.913247 | 2397       |
| V\$P300_01     | p300                 | EP300 | 0.768497 | 2358       |
| V\$ZIC3_01     | Zic3                 | ZIC3  | 0.413491 | 2195       |
| V\$SMAD4_Q6_01 | Smad4                | SMAD4 | 0.719688 | 2177       |
| V\$CMYB_Q5     | c-Myb                | MYB   | 0.278121 | 2152       |
| V\$MYB_Q6      | c-Myb                | MYB   | 0.278121 | 2152       |

|                |            |          |           |      |
|----------------|------------|----------|-----------|------|
| V\$TBX5_02     | TBX5       | TBX5     | 0.916782  | 2092 |
| V\$CETS1_Q6    | C-ets-1    | ETS1     | 0.576544  | 2086 |
| V\$NFAT4_Q3    | NF-AT4     | NFATC3   | 0.540865  | 2084 |
| V\$NR1B2_Q6    | NR1B2      | RARB     | 0.80578   | 2057 |
| V\$GATA1_01    | GATA-1     | GATA1    | 0.637845  | 2053 |
| V\$TTF1_Q5     | TTF-1      | NKX2-1   | 0.232646  | 2046 |
| V\$ETS2_Q6     | c-Ets-2    | ETS2     | 0.672813  | 2009 |
| V\$GABPA_Q4    | GABP-alpha | GABPA    | 0.382255  | 1986 |
| V\$YY1_01      | YY1        | YY1      | 0.288409  | 1969 |
| V\$SMAD3_Q6_01 | Smad3      | SMAD3    | 0.819455  | 1957 |
| V\$MEF2C_Q4    | MEF-2C     | MEF2C    | 0.43874   | 1940 |
| V\$Elf5_03     | ELF5       | ELF5     | 0.13696   | 1919 |
| V\$GR_Q6       | GR         | NR3C1    | 0.650298  | 1909 |
| V\$DLX5_01     | dlx5       | DLX5     | 0.132943  | 1886 |
| V\$NANOG_02    | Nanog      | NANOG    | 0.917603  | 1871 |
| V\$AML1_Q6     | AML1       | RUNX1    | 0.786352  | 1821 |
| V\$IPF1_01     | IPF1       | PDX1     | 0.95749   | 1817 |
| V\$HNF4A_Q6_01 | HNF-4alpha | HNF4A    | 0.309515  | 1809 |
| V\$AP4_Q6_02   | AP-4       | TFAP4    | 0.612706  | 1741 |
| V\$TBX5_01     | TBX5       | TBX5     | 0.916782  | 1705 |
| V\$BEN_01      | BEN        | GTF2IRD1 | 0.930847  | 1694 |
| V\$MAZ_Q6      | MAZ        | MAZ      | 0.288488  | 1564 |
| V\$ERBETA_Q5   | ER-beta    | ESR2     | 0.730676  | 1552 |
| V\$LRF_Q2      | LRF        | ZBTB7A   | 0.881985  | 1539 |
| V\$E2A_Q6      | E2A        | TCF3     | 0.793331  | 1504 |
| V\$E12_Q6      | E12        | TCF3     | 0.793331  | 1503 |
| V\$E47_02      | E47        | TCF3     | 0.793331  | 1496 |
| V\$MYOD_Q6_01  | MyoD       | MYOD1    | 0.83508   | 1493 |
| V\$SP1_Q6      | Sp1        | SP1      | 0.881089  | 1491 |
| V\$ING4_01     | ING4       | ING4     | 0.0842627 | 1485 |
| V\$TEL1_02     | TEL1       | ETV6     | 0.929123  | 1449 |
| V\$ELK1_02     | Elk-1      | ELK1     | 0.727822  | 1444 |
| V\$ETV3_02     | ETV3       | ETV3     | 0.616466  | 1403 |
| V\$ER71_02     | ER71       | ETV2     | 0.597756  | 1380 |
| V\$MYOGENIN_Q6 | myogenin   | MYOG     | 0.797785  | 1345 |
| V\$SP1_01      | Sp1        | SP1      | 0.881089  | 1343 |
| V\$SP1_Q6_01   | Sp1        | SP1      | 0.881089  | 1332 |
| V\$AP2ALPHA_Q6 | AP-2alpha  | TFAP2A   | 0.122318  | 1317 |
| V\$ZBP89_Q4    | ZBP89      | ZNF148   | 0.768483  | 1311 |
| V\$ELK1_06     | ELK-1      | ELK1     | 0.727822  | 1308 |
| V\$SP1_Q4_01   | Sp1        | SP1      | 0.881089  | 1297 |
| V\$TCF3_01     | TCF-3      | TCF7L1   | 0.706001  | 1290 |
| V\$SP1_Q2_01   | Sp1        | SP1      | 0.881089  | 1263 |
| V\$AP2ALPHA_01 | AP-2alpha  | TFAP2A   | 0.122318  | 1256 |
| V\$FKLF_Q5     | FKLF       | KLF11    | 0.108569  | 1237 |
| V\$ETV7_01     | ETV7       | ETV7     | 0.915056  | 1224 |

|                   |           |          |           |      |
|-------------------|-----------|----------|-----------|------|
| V\$WT1_Q6_01      | WT1       | WT1      | 0.114369  | 1223 |
| V\$AP4_Q5         | AP-4      | TFAP4    | 0.612706  | 1216 |
| V\$TEF1_Q6_03     | TEF-1     | TEAD1    | 0.926341  | 1193 |
| V\$CMYB_01        | c-Myb     | MYB      | 0.278121  | 1183 |
| V\$SP1_02         | SP1       | SP1      | 0.881089  | 1180 |
| V\$E2A_Q2         | E2A       | TCF3     | 0.793331  | 1178 |
| V\$ERF_02         | ERF       | ERF      | 0.539968  | 1166 |
| V\$EHF_03         | EHF       | EHF      | 0.205449  | 1138 |
| V\$TFII_Q6        | TFII-I    | GTF2I    | 0.685134  | 1128 |
| V\$ZFX_01         | Zfx       | ZFX      | 0.884315  | 1117 |
| V\$AML1_01        | AML1a     | RUNX1    | 0.786352  | 1075 |
| V\$AP4_Q6         | AP-4      | TFAP4    | 0.612706  | 1063 |
| V\$TEF1_Q6        | TEF-1     | TEAD1    | 0.926341  | 1055 |
| V\$CREM_Q6        | CREM      | CREM     | 0.332275  | 1054 |
| V\$ERR1_Q3        | ERR1      | ESRRA    | 0.854699  | 1042 |
| V\$AML1_Q4        | AML1      | RUNX1    | 0.786352  | 975  |
| V\$MYOGENIN_Q6_01 | myogenin  | MYOG     | 0.797785  | 971  |
| V\$SMAD3_Q6       | SMAD3     | SMAD3    | 0.819455  | 957  |
| V\$NEUROD_02      | NeuroD    | NEUROD1  | 0.871442  | 944  |
| V\$EGR1_02        | EGR-1     | EGR1     | 0.0258495 | 931  |
| V\$GABPBETA_Q3    | GABP-beta | GABPB1   | 0.629243  | 914  |
| V\$AP2GAMMA_01    | AP-2gamma | TFAP2C   | 0.267061  | 904  |
| V\$ZIC1_01        | Zic1      | ZIC1     | 0.1822    | 898  |
| V\$MYOD_Q6        | MyoD      | MYOD1    | 0.83508   | 879  |
| V\$AP2BETA_Q3     | AP-2beta  | TFAP2B   | 0.880094  | 871  |
| V\$CNOT3_01       | CNOT3     | CNOT3    | 0.799569  | 863  |
| V\$PAX8_01        | Pax-8     | PAX8     | 0.276466  | 832  |
| V\$DBP_Q6_01      | DBP       | DBP      | 0.830254  | 821  |
| V\$MEF2A_Q6       | mef2A     | MEF2A    | 0.10651   | 814  |
| V\$VDR_Q3         | VDR       | VDR      | 0.83353   | 813  |
| V\$DAX1_01        | Dax1      | NR0B1    | 0.628736  | 811  |
| V\$ATF1_Q6_01     | ATF-1     | ATF1     | 0.484191  | 786  |
| V\$PET1_02        | Pet-1     | FEV      | 0.57498   | 780  |
| V\$ERG_03         | ERG       | ERG      | 0.790627  | 773  |
| V\$MYOD_Q6_02     | MyoD      | MYOD1    | 0.83508   | 710  |
| V\$MATH1_Q2       | MATH1     | ATOH1    | 0.691884  | 710  |
| V\$KAISO_01       | KAISO     | ZBTB33   | 0.961287  | 694  |
| V\$ATF3_Q6_01     | ATF-3     | ATF3     | 0.213496  | 683  |
| V\$MYOD_01        | MyoD      | MYOD1    | 0.83508   | 640  |
| V\$CIZ_01         | CIZ       | ZNF384   | 0.560262  | 619  |
| V\$MEIS1_01       | MEIS1     | MEIS1    | 0.0377805 | 617  |
| V\$ERM_02         | Erm       | ETV5     | 0.0796504 | 613  |
| V\$ERG_01         | ERG       | ERG      | 0.790627  | 580  |
| V\$P53_02         | p53       | TP53     | 0.406827  | 526  |
| V\$BEN_02         | BEN       | GTF2IRD1 | 0.930847  | 463  |
| V\$SMAD4_Q6       | SMAD4     | SMAD4    | 0.719688  | 407  |

|               |        |        |           |     |
|---------------|--------|--------|-----------|-----|
| V\$STAF_02    | Staf   | ZNF143 | 0.872827  | 404 |
| V\$EGR2_01    | Egr-2  | EGR2   | 0.0895177 | 365 |
| V\$NUR77_Q5   | NUR77  | NR4A1  | 0.44718   | 325 |
| V\$ERR3_Q2    | ERR3   | ESRRG  | 0.641345  | 319 |
| V\$AMEF2_Q6   | aMEF-2 | MEF2A  | 0.10651   | 301 |
| V\$GLI_Q2     | GLI    | GLI1   | 0.5996    | 298 |
| V\$ATF6_01    | ATF6   | ATF6   | 0.456557  | 261 |
| V\$GLI3_Q5_01 | GLI3   | GLI3   | 0.78778   | 251 |
| V\$RSRFC4_Q2  | RSRFC4 | MEF2A  | 0.10651   | 228 |
| V\$ERR3_Q2_01 | ERR3   | ESRRG  | 0.641345  | 210 |
| V\$GCNF_Q3    | GCNF   | NR6A1  | 0.566637  | 205 |
| V\$GLI2_01    | GLI2   | GLI2   | 0.906412  | 198 |
| V\$RSRFC4_01  | RSRFC4 | MEF2A  | 0.10651   | 197 |
| V\$GLI3_02    | GLI3   | GLI3   | 0.78778   | 189 |
| V\$GLI3_01    | GLI3   | GLI3   | 0.78778   | 161 |
| V\$EGR1_01    | Egr-1  | EGR1   | 0.0258495 | 149 |
| V\$HLF_01     | HLF    | HLF    | 0.075662  | 124 |
| V\$E4BP4_01   | E4BP4  | NFIL3  | 0.728643  | 102 |
| V\$MEF2A_05   | MEF2A  | MEF2A  | 0.10651   | 65  |

hsa-mir-133b

| Matrix_id      | transcription factor | Gene   | PCC      | Occurrence |
|----------------|----------------------|--------|----------|------------|
| V\$PUR1_Q4     | PUR1                 | PURA   | 0.367101 | 2684       |
| V\$IK_Q5       | Ikaros               | IKZF1  | 0.800265 | 2632       |
| V\$PARP_Q4     | PARP                 | PARP1  | 0.650879 | 2574       |
| V\$PEA3_Q6     | PEA3                 | ETV4   | 0.813679 | 2553       |
| V\$AP2REP_01   | AP-2rep              | KLF12  | 0.921335 | 2515       |
| V\$P300_01     | p300                 | EP300  | 0.774408 | 2484       |
| V\$ZIC3_01     | Zic3                 | ZIC3   | 0.403813 | 2314       |
| V\$SMAD4_Q6_01 | Smad4                | SMAD4  | 0.72307  | 2297       |
| V\$CMYB_Q5     | c-Myb                | MYB    | 0.284568 | 2269       |
| V\$MYB_Q6      | c-Myb                | MYB    | 0.284568 | 2269       |
| V\$TBP_Q6      | TBP                  | TBP    | 0.318628 | 2216       |
| V\$CDX2_Q5_02  | CDX-2                | CDX2   | 0.902202 | 2216       |
| V\$CETS1_Q6    | C-ets-1              | ETS1   | 0.564842 | 2196       |
| V\$NFAT4_Q3    | NF-AT4               | NFATC3 | 0.555554 | 2194       |
| V\$NR1B2_Q6    | NR1B2                | RARB   | 0.814755 | 2163       |
| V\$ETS1_B      | c-Ets-1              | ETS1   | 0.564842 | 2160       |
| V\$TTF1_Q5     | TTF-1                | NKX2-1 | 0.196866 | 2160       |
| V\$GATA1_01    | GATA-1               | GATA1  | 0.617388 | 2155       |
| V\$ETS2_Q6     | c-Ets-2              | ETS2   | 0.691759 | 2117       |
| V\$GABPA_Q4    | GABP-alpha           | GABPA  | 0.377479 | 2088       |

|                |            |        |            |      |
|----------------|------------|--------|------------|------|
| V\$YY1_01      | YY1        | YY1    | 0.282576   | 2079 |
| V\$SMAD3_Q6_01 | Smad3      | SMAD3  | 0.831938   | 2066 |
| V\$MEF2C_Q4    | MEF-2C     | MEF2C  | 0.450612   | 2043 |
| V\$GR_Q6       | GR         | NR3C1  | 0.660689   | 2019 |
| V\$Elf5_03     | ELF5       | ELF5   | 0.138493   | 2012 |
| V\$DLX5_01     | dlx5       | DLX5   | 0.154941   | 1985 |
| V\$NANOG_02    | Nanog      | NANOG  | 0.931967   | 1969 |
| V\$SPI1_03     | SPI1       | SPI1   | 0.213047   | 1937 |
| V\$AML1_Q6     | AML1       | RUNX1  | 0.790303   | 1915 |
| V\$IPF1_01     | IPF1       | PDX1   | 0.965777   | 1911 |
| V\$HNF4A_Q6_01 | HNF-4alpha | HNF4A  | 0.315531   | 1909 |
| V\$SOX5_01     | SOX5       | SOX5   | 0.554934   | 1902 |
| V\$YY1_Q6      | YY1        | YY1    | 0.282576   | 1884 |
| V\$ETS2_B      | c-Ets-2    | ETS2   | 0.691759   | 1864 |
| V\$AP4_Q6_02   | AP-4       | TFAP4  | 0.613354   | 1832 |
| V\$SPI1_Q5     | SPI1       | SPI1   | 0.213047   | 1829 |
| V\$GATA6_01    | GATA-6     | GATA6  | 0.00447234 | 1822 |
| V\$GATA2_02    | GATA-2     | GATA2  | 0.38488    | 1822 |
| V\$GATA1_06    | GATA-1     | GATA1  | 0.617388   | 1822 |
| V\$GATA1_05    | GATA-1     | GATA1  | 0.617388   | 1822 |
| V\$IPF1_Q6     | IPF1       | PDX1   | 0.965777   | 1806 |
| V\$YY1_Q6_02   | YY1        | YY1    | 0.282576   | 1795 |
| V\$IPF1_Q4_01  | IPF1       | PDX1   | 0.965777   | 1739 |
| V\$SRY_02      | SRY        | SRY    | 0.688077   | 1716 |
| V\$NKX32_01    | Nkx3-2     | NKX3-2 | 0.876274   | 1698 |
| V\$CDX2_01     | Cdx-2      | CDX2   | 0.902202   | 1654 |
| V\$MAZ_Q6      | MAZ        | MAZ    | 0.279355   | 1654 |
| V\$ERBETA_Q5   | ER-beta    | ESR2   | 0.747344   | 1640 |
| V\$PARP_Q3     | PARP       | PARP1  | 0.650879   | 1629 |
| V\$PITX3_Q2    | PITX3      | PITX3  | 0.668702   | 1628 |
| V\$LRF_Q2      | LRF        | ZBTB7A | 0.8858     | 1623 |
| V\$NFAT2_Q5    | NF-AT2     | NFATC1 | 0.946838   | 1616 |
| V\$IRF4_Q6     | IRF-4      | IRF4   | 0.926229   | 1587 |
| V\$HMGIIY_01   | HMGIIY     | HMG1A1 | 0.0218946  | 1557 |
| V\$HNF3A_01    | HNF3A      | FOXA1  | 0.469678   | 1492 |
| V\$CRX_Q4      | Crx        | CRX    | 0.780119   | 1491 |
| V\$IPF1_Q4     | IPF1       | PDX1   | 0.965777   | 1459 |
| V\$MYOGENIN_Q6 | myogenin   | MYOG   | 0.814275   | 1414 |
| V\$LEF1_Q5     | LEF-1      | LEF1   | 0.00741054 | 1370 |
| V\$TCF3_01     | TCF-3      | TCF7L1 | 0.707523   | 1366 |
| V\$GFI1_Q6     | Gfi1       | GFI1   | 0.4075     | 1365 |
| V\$PITX2_Q2    | Pitx2      | PITX2  | 0.794081   | 1342 |
| V\$GFI1_Q6_01  | Gfi1       | GFI1   | 0.4075     | 1341 |
| V\$FKLF_Q5     | FKLF       | KLF11  | 0.0949936  | 1309 |
| V\$SOX10_Q6    | SOX10      | SOX10  | 0.432243   | 1301 |
| V\$CEBPE_Q6    | CEBPE      | CEBPE  | 0.432728   | 1298 |



|                   |            |         |          |      |
|-------------------|------------|---------|----------|------|
| V\$AP4_Q5         | AP-4       | TFAP4   | 0.613354 | 1274 |
| V\$FOXMI_01       | FOXMI      | FOXMI   | 0.216338 | 1264 |
| V\$TEF1_Q6_03     | TEF-1      | TEAD1   | 0.939755 | 1253 |
| V\$RFX1_02        | RFX1       | RFX1    | 0.94301  | 1208 |
| V\$RFX1_01        | RFX1       | RFX1    | 0.94301  | 1146 |
| V\$CRX_Q4_01      | CRX        | CRX     | 0.780119 | 1122 |
| V\$AP4_Q6         | AP-4       | TFAP4   | 0.613354 | 1114 |
| V\$TEF1_Q6        | TEF-1      | TEAD1   | 0.939755 | 1112 |
| V\$ELF5_01        | ELF5       | ELF5    | 0.138493 | 1073 |
| V\$IRF7_Q3        | IRF-7      | IRF7    | 0.14757  | 1050 |
| V\$MYOGENIN_Q6_01 | myogenin   | MYOG    | 0.814275 | 1017 |
| V\$FAC1_01        | FAC1       | BPTF    | 0.232955 | 989  |
| V\$CEBPB_02       | C/EBPbeta  | CEBPB   | 0.231195 | 969  |
| V\$CEBPD_Q6       | C/EBPdelta | CEBPD   | 0.190911 | 968  |
| V\$DBP_Q6_01      | DBP        | DBP     | 0.826902 | 869  |
| V\$HOXD9_Q2       | Hoxd9      | HOXD9   | 0.757739 | 866  |
| V\$CEBPB_Q6       | C/EBPbeta  | CEBPB   | 0.231195 | 826  |
| V\$AP4_Q6_01      | AP-4       | TFAP4   | 0.613354 | 816  |
| V\$YY1_02         | YY1        | YY1     | 0.282576 | 759  |
| V\$IPF1_02        | IPF1       | PDX1    | 0.965777 | 748  |
| V\$HNF6_Q6        | HNF6       | ONECUT1 | 0.279227 | 729  |
| V\$HOXB8_01       | HOXB8      | HOXB8   | 0.511831 | 635  |
| V\$P53_02         | p53        | TP53    | 0.420412 | 549  |
| V\$STAT4_Q5       | STAT4      | STAT4   | 0.861611 | 542  |
| V\$EAR2_Q2        | EAR2       | NR2F6   | 0.250559 | 537  |
| V\$SOX2_Q6        | SOX2       | SOX2    | 0.178983 | 497  |
| V\$RORBETA_Q2     | RORBETA    | RORB    | 0.854319 | 485  |
| V\$CREL_01        | c-Rel      | REL     | 0.751442 | 482  |
| V\$POU6F1_03      | POU6F1     | POU6F1  | 0.641259 | 458  |
| V\$CEBPB_01       | C/EBPbeta  | CEBPB   | 0.231195 | 410  |
| V\$POU6F1_02      | POU6F1     | POU6F1  | 0.641259 | 377  |
| V\$SPIB_01        | SPI-B      | SPIB    | 0.535111 | 363  |
| V\$AMEF2_Q6       | aMEF-2     | MEF2A   | 0.106519 | 316  |

hsa-mir-134

| Matrix_id   | transcription factor | Gene  | PCC       | Occurrence |
|-------------|----------------------|-------|-----------|------------|
| V\$PARP_Q4  | PARP                 | PARP1 | 0.105838  | 41         |
| V\$PEA3_Q6  | PEA3                 | ETV4  | 0.0375251 | 38         |
| V\$YY1_01   | YY1                  | YY1   | 0.126463  | 34         |
| V\$GABPA_Q4 | GABP-alpha           | GABPA | 0.072031  | 32         |
| V\$SOX9_Q4  | SOX9                 | SOX9  | 0.0411387 | 31         |
| V\$YY1_Q6   | YY1                  | YY1   | 0.126463  | 30         |

|                |            |         |            |    |
|----------------|------------|---------|------------|----|
| V\$HNF4A_Q6_01 | HNF-4alpha | HNF4A   | 0.114714   | 30 |
| V\$YY1_Q6_02   | YY1        | YY1     | 0.126463   | 30 |
| V\$GATA3_01    | GATA-3     | GATA3   | 0.0589134  | 27 |
| V\$AP2ALPHA_Q6 | AP-2alpha  | TFAP2A  | 0.0802117  | 24 |
| V\$AHR_Q5      | AhR        | AHR     | 0.0322404  | 23 |
| V\$PBX1_04     | Pbx1       | PBX1    | 0.231858   | 23 |
| V\$CREM_Q6     | CREM       | CREM    | 0.603441   | 20 |
| V\$SOX10_Q6    | SOX10      | SOX10   | 0.0277026  | 18 |
| V\$PIT1_Q6     | Pit-1      | POU1F1  | 0.280054   | 14 |
| V\$CEBPB_02    | C/EBPbeta  | CEBPB   | 0.0744071  | 14 |
| V\$GABPBETA_Q3 | GABP-beta  | GABPB1  | 0.0540247  | 13 |
| V\$ATF4_Q6     | ATF-4      | ATF4    | 0.0153788  | 12 |
| V\$FOXP3_01    | FOXP3      | FOXP3   | 0.00295086 | 11 |
| V\$YY1_02      | YY1        | YY1     | 0.126463   | 10 |
| V\$MAFK_Q3     | MafK       | MAFK    | 0.19942    | 10 |
| V\$OC2_Q3      | OC-2       | ONECUT2 | 0.0934791  | 8  |
| V\$ELK1_01     | Elk-1      | ELK1    | 0.277918   | 6  |

hsa-mir-135a-1

| Matrix_id      | transcription factor | Gene   | PCC       | Occurrence |
|----------------|----------------------|--------|-----------|------------|
| V\$PUR1_Q4     | PUR1                 | PURA   | 0.121079  | 55         |
| V\$ELF1_Q6     | Elf-1                | ELF1   | 0.214849  | 53         |
| V\$P300_01     | p300                 | EP300  | 0.153531  | 52         |
| V\$GKLF_Q4     | GKLF                 | KLF4   | 0.0770016 | 51         |
| V\$SOX9_Q4     | SOX9                 | SOX9   | 0.171507  | 50         |
| V\$SMAD4_Q6_01 | Smad4                | SMAD4  | 0.108653  | 50         |
| V\$ZIC3_01     | Zic3                 | ZIC3   | 0.308834  | 49         |
| V\$SMAD3_Q6_01 | Smad3                | SMAD3  | 0.0169106 | 46         |
| V\$TTF1_Q5     | TTF-1                | NKX2-1 | 0.722604  | 46         |
| V\$GR_Q6       | GR                   | NR3C1  | 0.0954178 | 45         |
| V\$YY1_01      | YY1                  | YY1    | 0.460208  | 43         |
| V\$SOX9_B1     | SOX9                 | SOX9   | 0.171507  | 41         |
| V\$PBX1_04     | Pbx1                 | PBX1   | 0.260413  | 38         |
| V\$TCF3_01     | TCF-3                | TCF7L1 | 0.0626344 | 32         |
| V\$ZABC1_01    | ZABC1                | ZNF217 | 0.0431223 | 32         |
| V\$YY1_Q6_03   | YY1                  | YY1    | 0.460208  | 31         |
| V\$HMG1Y_01    | HMG1Y                | HMGA1  | 0.120464  | 29         |
| V\$GR_01       | GR                   | NR3C1  | 0.0954178 | 25         |
| V\$ZBP89_Q4    | ZBP89                | ZNF148 | 0.0857699 | 25         |
| V\$GFI1B_01    | Gfi1b                | GFI1B  | 0.0220511 | 24         |
| V\$DBP_Q6_01   | DBP                  | DBP    | 0.234292  | 21         |
| V\$MSX1_01     | Msx-1                | MSX1   | 0.0684242 | 19         |

|             |       |         |           |    |
|-------------|-------|---------|-----------|----|
| V\$OC2_Q3   | OC-2  | ONECUT2 | 0.0315688 | 18 |
| V\$SOX2_Q6  | SOX2  | SOX2    | 0.0967753 | 14 |
| V\$HOXB8_01 | HOXB8 | HOXB8   | 0.166763  | 12 |
| V\$IRF2_01  | IRF-2 | IRF2    | 0.0232381 | 7  |
| V\$ZID_01   | ZID   | ZBTB6   | 0.0969331 | 5  |

hsa-mir-135a-2

| Matrix_id      | transcription factor | Gene    | PCC        | Occurrence |
|----------------|----------------------|---------|------------|------------|
| V\$ELF1_Q6     | Elf-1                | ELF1    | 0.214849   | 53         |
| V\$P300_01     | p300                 | EP300   | 0.153531   | 52         |
| V\$SMAD4_Q6_01 | Smad4                | SMAD4   | 0.108653   | 50         |
| V\$SOX9_Q4     | SOX9                 | SOX9    | 0.171507   | 50         |
| V\$ETS1_B      | c-Ets-1              | ETS1    | 0.07448    | 48         |
| V\$GATA1_01    | GATA-1               | GATA1   | 0.163084   | 47         |
| V\$CETS1_Q6    | C-ets-1              | ETS1    | 0.07448    | 47         |
| V\$SMAD3_Q6_01 | Smad3                | SMAD3   | 0.0169106  | 46         |
| V\$TTF1_Q5     | TTF-1                | NKX2-1  | 0.722604   | 46         |
| V\$GR_Q6       | GR                   | NR3C1   | 0.0954178  | 45         |
| V\$GABPA_Q4    | GABP-alpha           | GABPA   | 0.292074   | 44         |
| V\$SPI1_Q5     | SPI1                 | SPI1    | 0.0301576  | 43         |
| V\$YY1_01      | YY1                  | YY1     | 0.460208   | 43         |
| V\$GATA1_02    | GATA-1               | GATA1   | 0.163084   | 42         |
| V\$SOX9_B1     | SOX9                 | SOX9    | 0.171507   | 41         |
| V\$YY1_Q6      | YY1                  | YY1     | 0.460208   | 39         |
| V\$PBX1_04     | Pbx1                 | PBX1    | 0.260413   | 38         |
| V\$GATA1_05    | GATA-1               | GATA1   | 0.163084   | 38         |
| V\$GATA1_06    | GATA-1               | GATA1   | 0.163084   | 38         |
| V\$GATA1_04    | GATA-1               | GATA1   | 0.163084   | 32         |
| V\$ZABC1_01    | ZABC1                | ZNF217  | 0.0431223  | 32         |
| V\$PBX1_Q3     | Pbx1                 | PBX1    | 0.260413   | 31         |
| V\$YY1_Q6_03   | YY1                  | YY1     | 0.460208   | 31         |
| V\$ING4_01     | ING4                 | ING4    | 0.0312823  | 30         |
| V\$HMG1Y_01    | HMG1Y                | HMG1A   | 0.120464   | 29         |
| V\$HIF1A_Q6    | HIF-1alpha           | HIF1A   | 0.26739    | 27         |
| V\$GFI1B_01    | Gfi1b                | GFI1B   | 0.0220511  | 24         |
| V\$CREM_Q6     | CREM                 | CREM    | 0.142725   | 23         |
| V\$DBP_Q6_01   | DBP                  | DBP     | 0.234292   | 21         |
| V\$FOXO4_02    | FOXO4                | FOXO4   | 0.00715137 | 19         |
| V\$MSX1_01     | Msx-1                | MSX1    | 0.0684242  | 19         |
| V\$MEF2A_Q6    | mef2A                | MEF2A   | 0.150717   | 19         |
| V\$OC2_Q3      | OC-2                 | ONECUT2 | 0.0315688  | 18         |
| V\$CEBPG_Q6_01 | C/EBPgamma           | CEBPG   | 0.0859869  | 18         |

|              |        |       |            |    |
|--------------|--------|-------|------------|----|
| V\$FOXO4_01  | FOXO4  | FOXO4 | 0.00715137 | 13 |
| V\$HOXB8_01  | HOXB8  | HOXB8 | 0.166763   | 12 |
| V\$RSRFC4_Q2 | RSRFC4 | MEF2A | 0.150717   | 7  |
| V\$RSRFC4_01 | RSRFC4 | MEF2A | 0.150717   | 7  |
| V\$USF2_Q6   | USF2   | USF2  | 0.106333   | 6  |
| V\$MAX_01    | Max    | MAX   | 0.221346   | 6  |
| V\$CDP_01    | CDP    | CUX1  | 0.13476    | 1  |

hsa-mir-135b

| Matrix_id      | transcription factor | Gene   | PCC       | Occurrence |
|----------------|----------------------|--------|-----------|------------|
| V\$PUR1_Q4     | PUR1                 | PURA   | 0.114205  | 215        |
| V\$PEA3_Q6     | PEA3                 | ETV4   | 0.0677754 | 210        |
| V\$PARP_Q4     | PARP                 | PARP1  | 0.113208  | 209        |
| V\$ELF1_Q6     | Elf-1                | ELF1   | 0.18553   | 206        |
| V\$GKLF_Q4     | GKLF                 | KLF4   | 0.641596  | 202        |
| V\$MAFB_01     | MAFB                 | MAFB   | 0.313849  | 198        |
| V\$P300_01     | p300                 | EP300  | 0.371673  | 192        |
| V\$ETS1_B      | c-Ets-1              | ETS1   | 0.0765311 | 191        |
| V\$ZIC3_01     | Zic3                 | ZIC3   | 0.0733606 | 190        |
| V\$CETS1_Q6    | C-ets-1              | ETS1   | 0.0765311 | 189        |
| V\$SMAD4_Q6_01 | Smad4                | SMAD4  | 0.29145   | 183        |
| V\$SOX9_Q4     | SOX9                 | SOX9   | 0.0601283 | 181        |
| V\$GABPA_Q4    | GABP-alpha           | GABPA  | 0.401935  | 179        |
| V\$TBX5_02     | TBX5                 | TBX5   | 0.0306843 | 169        |
| V\$GR_Q6       | GR                   | NR3C1  | 0.0925263 | 165        |
| V\$TTF1_Q5     | TTF-1                | NKX2-1 | 0.0420681 | 164        |
| V\$YY1_01      | YY1                  | YY1    | 0.485084  | 163        |
| V\$AML1_Q6     | AML1                 | RUNX1  | 0.0109222 | 151        |
| V\$MAZ_Q6      | MAZ                  | MAZ    | 0.0437113 | 149        |
| V\$SOX5_01     | SOX5                 | SOX5   | 0.0599985 | 145        |
| V\$SOX9_B1     | SOX9                 | SOX9   | 0.0601283 | 145        |
| V\$GATA1_02    | GATA-1               | GATA1  | 0.0636809 | 142        |
| V\$TBX5_01     | TBX5                 | TBX5   | 0.0306843 | 140        |
| V\$GATA2_02    | GATA-2               | GATA2  | 0.626252  | 133        |
| V\$GATA1_06    | GATA-1               | GATA1  | 0.0636809 | 133        |
| V\$GATA1_05    | GATA-1               | GATA1  | 0.0636809 | 133        |
| V\$E2A_Q6      | E2A                  | TCF3   | 0.0465449 | 128        |
| V\$E12_Q6      | E12                  | TCF3   | 0.0465449 | 128        |
| V\$E47_02      | E47                  | TCF3   | 0.0465449 | 126        |
| V\$FKLF_Q5     | FKLF                 | KLF11  | 0.365427  | 122        |
| V\$GATA1_04    | GATA-1               | GATA1  | 0.0636809 | 119        |
| V\$GATA3_02    | GATA-3               | GATA3  | 0.830837  | 114        |

|                |            |               |            |     |
|----------------|------------|---------------|------------|-----|
| V\$YY1_Q6_03   | YY1        | YY1           | 0.485084   | 111 |
| V\$E2A_Q2      | E2A        | TCF3          | 0.0465449  | 111 |
| V\$GATA3_01    | GATA-3     | GATA3         | 0.830837   | 110 |
| V\$MAZ_Q6_01   | MAZ        | MAZ           | 0.0437113  | 110 |
| V\$ARNT_01     | Arnt       | ARNT          | 0.234802   | 109 |
| V\$ELK1_02     | Elk-1      | ELK1          | 0.0417119  | 105 |
| V\$CMAF_01     | c-Maf      | MAF           | 0.0660337  | 105 |
| V\$TCF4_01     | TCF-4      | TCF7L2        | 0.569759   | 103 |
| V\$GR_01       | GR         | NR3C1         | 0.0925263  | 100 |
| V\$TCF4_Q5     | TCF-4      | TCF7L2        | 0.569759   | 96  |
| V\$ELK1_06     | ELK-1      | ELK1          | 0.0417119  | 95  |
| V\$CEBPA_Q6    | C/EBPalpha | CEBPA         | 0.00256014 | 92  |
| V\$FOXJ2_01    | FOXJ2      | FOXJ2         | 0.101755   | 90  |
| V\$AML1_01     | AML1a      | RUNX1         | 0.0109222  | 90  |
| V\$GABPBETA_Q3 | GABP-beta  | GABPB1        | 0.282764   | 86  |
| V\$ESE1_Q3     | ESE-1      | ELF3          | 0.100243   | 82  |
| V\$AML1_Q4     | AML1       | RUNX1         | 0.0109222  | 80  |
| V\$ZABC1_01    | ZABC1      | ZNF217        | 0.874513   | 78  |
| V\$E47_01      | E47        | TCF3          | 0.0465449  | 71  |
| V\$CEBPB_02    | C/EBPbeta  | CEBPB         | 0.494546   | 70  |
| V\$ESE1_02     | ESE-1      | ELF3          | 0.100243   | 66  |
| V\$STAT3_03    | STAT3      | STAT3         | 0.0831841  | 62  |
| V\$ERG_03      | ERG        | ERG           | 0.234707   | 49  |
| V\$DEC2_Q2     |            | 2-Dec BHLHE41 | 0.0610578  | 45  |
| V\$ERM_02      | Erm        | ETV5          | 0.59021    | 35  |
| V\$ERG_01      | ERG        | ERG           | 0.234707   | 34  |
| V\$SP3_Q3      | Sp3        | SP3           | 0.460519   | 25  |
| V\$FLI1_02     | Fli-1      | FLI1          | 0.191373   | 20  |
| V\$TCF4_Q5_01  | TCF-4      | TCF7L2        | 0.569759   | 16  |
| V\$GRE_C       | GR         | NR3C1         | 0.0925263  | 13  |

hsa-mir-137

| Matrix_id   | transcription factor | Gene  | PCC       | Occurrence |
|-------------|----------------------|-------|-----------|------------|
| V\$PUR1_Q4  | PUR1                 | PURA  | 0.413083  | 436        |
| V\$PARP_Q4  | PARP                 | PARP1 | 0.430662  | 401        |
| V\$MAFB_01  | MAFB                 | MAFB  | 0.187755  | 398        |
| V\$ZIC3_01  | Zic3                 | ZIC3  | 0.140937  | 397        |
| V\$ETS2_Q6  | c-Ets-2              | ETS2  | 0.146818  | 358        |
| V\$GABPA_Q4 | GABP-alpha           | GABPA | 0.188799  | 349        |
| V\$TBP_Q6   | TBP                  | TBP   | 0.0297352 | 348        |
| V\$SOX9_Q4  | SOX9                 | SOX9  | 0.180876  | 345        |
| V\$GR_Q6    | GR                   | NR3C1 | 0.0548101 | 317        |

|                |            |        |            |     |
|----------------|------------|--------|------------|-----|
| V\$YY1_01      | YY1        | YY1    | 0.172617   | 315 |
| V\$MEF2C_Q4    | MEF-2C     | MEF2C  | 0.766878   | 312 |
| V\$HNF4A_Q6_01 | HNF-4alpha | HNF4A  | 0.00545371 | 302 |
| V\$DLX5_01     | dlx5       | DLX5   | 0.141943   | 298 |
| V\$SOX9_B1     | SOX9       | SOX9   | 0.180876   | 294 |
| V\$YY1_Q6_02   | YY1        | YY1    | 0.172617   | 291 |
| V\$YY1_Q6      | YY1        | YY1    | 0.172617   | 289 |
| V\$SRY_02      | SRY        | SRY    | 0.112293   | 268 |
| V\$ING4_01     | ING4       | ING4   | 0.65092    | 258 |
| V\$ELK1_02     | Elk-1      | ELK1   | 0.169323   | 243 |
| V\$FOXO3A_Q1   | FOXO3A     | FOXO3  | 0.0149623  | 241 |
| V\$PITX3_Q2    | PITX3      | PITX3  | 0.143531   | 237 |
| V\$PBX1_04     | Pbx1       | PBX1   | 0.2775     | 237 |
| V\$PBX1_Q3     | Pbx1       | PBX1   | 0.2775     | 225 |
| V\$YY1_Q6_03   | YY1        | YY1    | 0.172617   | 223 |
| V\$GR_01       | GR         | NR3C1  | 0.0548101  | 190 |
| V\$IRF8_Q6     | IRF-8      | IRF8   | 0.115117   | 186 |
| V\$LHX3b_01    | LHX3b      | LHX3   | 0.00877322 | 147 |
| V\$MEF2A_Q6    | mef2A      | MEF2A  | 0.598674   | 140 |
| V\$FAC1_01     | FAC1       | BPTF   | 0.122007   | 139 |
| V\$PIT1_Q6     | Pit-1      | POU1F1 | 0.0295181  | 133 |
| V\$NKX22_02    | NKX2B      | NKX2-2 | 0.824319   | 133 |
| V\$DBP_Q6_01   | DBP        | DBP    | 0.22362    | 130 |
| V\$NURR1_Q3    | NURR1      | NR4A2  | 0.244727   | 127 |
| V\$YY1_02      | YY1        | YY1    | 0.172617   | 124 |
| V\$MSX1_01     | Msx-1      | MSX1   | 0.17531    | 113 |
| V\$HOX13_02    | HOXA5      | HOXA5  | 0.0855414  | 99  |
| V\$LHX3_01     | Lhx3       | LHX3   | 0.00877322 | 74  |
| V\$RORBETA_Q2  | RORBETA    | RORB   | 0.291374   | 67  |
| V\$CEBPG_Q6    | C/EBPgamma | CEBPG  | 0.140723   | 62  |
| V\$AMEF2_Q6    | aMEF-2     | MEF2A  | 0.598674   | 53  |
| V\$RSRFC4_Q2   | RSRFC4     | MEF2A  | 0.598674   | 39  |
| V\$POU3F2_02   | POU3F2     | POU3F2 | 0.0595025  | 37  |
| V\$RSRFC4_01   | RSRFC4     | MEF2A  | 0.598674   | 36  |
| V\$LHX3A_01    | Lhx3a      | LHX3   | 0.00877322 | 21  |

hsa-mir-138-2

| Matrix_id      | transcription factor | Gene  | PCC      | Occurrence |
|----------------|----------------------|-------|----------|------------|
| V\$PUR1_Q4     | PUR1                 | PURA  | 0.116302 | 51         |
| V\$SMAD4_Q6_01 | Smad4                | SMAD4 | 0.078533 | 50         |
| V\$ELF1_Q6     | Elf-1                | ELF1  | 0.138143 | 49         |
| V\$MAFB_01     | MAFB                 | MAFB  | 0.462494 | 48         |

|                |            |          |            |    |
|----------------|------------|----------|------------|----|
| V\$ZIC3_01     | Zic3       | ZIC3     | 0.207155   | 48 |
| V\$P300_01     | p300       | EP300    | 0.134196   | 47 |
| V\$GATA1_01    | GATA-1     | GATA1    | 0.144224   | 47 |
| V\$ETS1_B      | c-Ets-1    | ETS1     | 0.0214665  | 46 |
| V\$SOX9_Q4     | SOX9       | SOX9     | 0.0661001  | 45 |
| V\$CETS1_Q6    | C-ets-1    | ETS1     | 0.0214665  | 43 |
| V\$TTF1_Q5     | TTF-1      | NKX2-1   | 0.758126   | 43 |
| V\$AP4_Q6_02   | AP-4       | TFAP4    | 0.274173   | 41 |
| V\$MEF2C_Q4    | MEF-2C     | MEF2C    | 0.165845   | 41 |
| V\$GABPA_Q4    | GABP-alpha | GABPA    | 0.325585   | 41 |
| V\$GATA1_02    | GATA-1     | GATA1    | 0.144224   | 40 |
| V\$GR_Q6       | GR         | NR3C1    | 0.0798799  | 39 |
| V\$SOX9_B1     | SOX9       | SOX9     | 0.0661001  | 38 |
| V\$SPI1_Q5     | SPI1       | SPI1     | 0.0754872  | 38 |
| V\$PBX1_Q4     | Pbx1       | PBX1     | 0.262137   | 38 |
| V\$YY1_01      | YY1        | YY1      | 0.406494   | 36 |
| V\$BEN_01      | BEN        | GTF2IRD1 | 0.00396902 | 35 |
| V\$SPI1_Q3     | SPI1       | SPI1     | 0.0754872  | 34 |
| V\$GATA1_Q5    | GATA-1     | GATA1    | 0.144224   | 33 |
| V\$GATA1_Q6    | GATA-1     | GATA1    | 0.144224   | 33 |
| V\$MAZ_Q6      | MAZ        | MAZ      | 0.104485   | 32 |
| V\$SOX10_Q6    | SOX10      | SOX10    | 0.102967   | 31 |
| V\$TCF4_Q5     | TCF-4      | TCF7L2   | 0.27886    | 30 |
| V\$GATA1_Q4    | GATA-1     | GATA1    | 0.144224   | 30 |
| V\$ING4_Q1     | ING4       | ING4     | 0.147685   | 29 |
| V\$AP4_Q5      | AP-4       | TFAP4    | 0.274173   | 29 |
| V\$SP1_Q1      | Sp1        | SP1      | 0.0183846  | 28 |
| V\$TCF3_Q1     | TCF-3      | TCF7L1   | 0.0573506  | 28 |
| V\$HMG1Y_Q1    | HMG1Y      | HMG1A    | 0.0461375  | 28 |
| V\$CMAF_Q1     | c-Maf      | MAF      | 0.04921    | 27 |
| V\$AP4_Q6      | AP-4       | TFAP4    | 0.274173   | 27 |
| V\$HIF1A_Q6    | HIF-1alpha | HIF1A    | 0.259716   | 26 |
| V\$TCF4_Q1     | TCF-4      | TCF7L2   | 0.27886    | 25 |
| V\$GFI1B_Q1    | Gfi1b      | GFI1B    | 0.0829057  | 22 |
| V\$DBP_Q6_Q1   | DBP        | DBP      | 0.327356   | 21 |
| V\$GABPBETA_Q3 | GABP-beta  | GABPB1   | 0.195189   | 19 |
| V\$GR_Q1       | GR         | NR3C1    | 0.0798799  | 19 |
| V\$NKX2B_Q3    | NKX2B      | NKX2-2   | 0.0862461  | 19 |
| V\$NKX22_Q2    | NKX2B      | NKX2-2   | 0.0862461  | 19 |
| V\$POU6F1_Q3   | POU6F1     | POU6F1   | 0.00421631 | 18 |
| V\$CEBPG_Q6_Q1 | C/EBPgamma | CEBPG    | 0.0492425  | 16 |
| V\$POU6F1_Q2   | POU6F1     | POU6F1   | 0.00421631 | 15 |
| V\$AP4_Q1      | AP-4       | TFAP4    | 0.274173   | 15 |
| V\$CEBPG_Q6    | C/EBPgamma | CEBPG    | 0.0492425  | 12 |
| V\$AMEF2_Q6    | aMEF-2     | MEF2A    | 0.293808   | 9  |
| V\$MAX_Q1      | Max        | MAX      | 0.252062   | 6  |

|            |      |      |          |   |
|------------|------|------|----------|---|
| V\$USF2_Q6 | USF2 | USF2 | 0.2393   | 6 |
| V\$MAX_Q6  | MAX  | MAX  | 0.252062 | 3 |

hsa-mir-139

| Matrix_id      | transcription factor | Gene    | PCC       | Occurrence |
|----------------|----------------------|---------|-----------|------------|
| V\$PUR1_Q4     | PUR1                 | PURA    | 0.241085  | 52         |
| V\$PARP_Q4     | PARP                 | PARP1   | 0.330438  | 49         |
| V\$ZIC3_01     | Zic3                 | ZIC3    | 0.141595  | 47         |
| V\$GABPA_Q4    | GABP-alpha           | GABPA   | 0.129231  | 47         |
| V\$MAFB_01     | MAFB                 | MAFB    | 0.0721167 | 45         |
| V\$NR1B2_Q6    | NR1B2                | RARB    | 0.0797253 | 44         |
| V\$ETS2_Q6     | c-Ets-2              | ETS2    | 0.0193522 | 44         |
| V\$SOX9_Q4     | SOX9                 | SOX9    | 0.116808  | 42         |
| V\$MEF2C_Q4    | MEF-2C               | MEF2C   | 0.589447  | 41         |
| V\$SOX9_B1     | SOX9                 | SOX9    | 0.116808  | 40         |
| V\$ETS2_B      | c-Ets-2              | ETS2    | 0.0193522 | 40         |
| V\$AP4_Q6_02   | AP-4                 | TFAP4   | 0.27257   | 40         |
| V\$YY1_01      | YY1                  | YY1     | 0.0507061 | 39         |
| V\$YY1_Q6      | YY1                  | YY1     | 0.0507061 | 38         |
| V\$GATA6_01    | GATA-6               | GATA6   | 0.363316  | 38         |
| V\$YY1_Q6_02   | YY1                  | YY1     | 0.0507061 | 38         |
| V\$HNF4A_Q6_01 | HNF-4alpha           | HNF4A   | 0.225703  | 36         |
| V\$PARP_Q3     | PARP                 | PARP1   | 0.330438  | 32         |
| V\$CRX_Q4      | Crx                  | CRX     | 0.0240351 | 29         |
| V\$PITX3_Q2    | PITX3                | PITX3   | 0.380527  | 28         |
| V\$ING4_01     | ING4                 | ING4    | 0.464415  | 28         |
| V\$FOXJ2_01    | FOXJ2                | FOXJ2   | 0.0545314 | 28         |
| V\$PBX1_Q3     | Pbx1                 | PBX1    | 0.301013  | 27         |
| V\$HIF1A_Q6    | HIF-1alpha           | HIF1A   | 0.383404  | 26         |
| V\$SOX10_Q6    | SOX10                | SOX10   | 0.545042  | 25         |
| V\$PIT1_Q6     | Pit-1                | POU1F1  | 0.349317  | 24         |
| V\$PBX1_Q4     | Pbx1                 | PBX1    | 0.301013  | 23         |
| V\$AP4_Q5      | AP-4                 | TFAP4   | 0.27257   | 23         |
| V\$SREBP1_Q6   | SREBP-1              | SREBF1  | 0.509506  | 22         |
| V\$CP2_01      | CP2                  | TFCP2   | 0.265714  | 21         |
| V\$CRX_Q2      | Crx                  | CRX     | 0.0240351 | 21         |
| V\$AP4_Q6      | AP-4                 | TFAP4   | 0.27257   | 20         |
| V\$MEF2A_Q6    | mef2A                | MEF2A   | 0.395519  | 17         |
| V\$MEIS1_01    | MEIS1                | MEIS1   | 0.0576939 | 17         |
| V\$ZIC1_01     | Zic1                 | ZIC1    | 0.721344  | 14         |
| V\$AP4_Q6_01   | AP-4                 | TFAP4   | 0.27257   | 12         |
| V\$DEC2_Q2     | 2-Dec                | BHLHE41 | 0.468235  | 10         |



|              |         |        |           |   |
|--------------|---------|--------|-----------|---|
| V\$SREBP1_02 | SREBP-1 | SREBF1 | 0.509506  | 8 |
| V\$HOXA7_01  | HOXA7   | HOXA7  | 0.174426  | 6 |
| V\$POU3F2_01 | POU3F2  | POU3F2 | 0.0844723 | 6 |

hsa-mir-141

| Matrix_id      | transcription factor | Gene   | PCC        | Occurrence |
|----------------|----------------------|--------|------------|------------|
| V\$DLX5_01     | dlx5                 | DLX5   | 0.235932   | 31         |
| V\$GKLF_Q4     | GKLF                 | KLF4   | 0.125629   | 29         |
| V\$PITX2_Q2    | Pitx2                | PITX2  | 0.163871   | 22         |
| V\$TCF4_01     | TCF-4                | TCF7L2 | 0.0204144  | 21         |
| V\$PITX2_01    | PITX2                | PITX2  | 0.163871   | 21         |
| V\$AP2ALPHA_Q6 | AP-2alpha            | TFAP2A | 0.376872   | 17         |
| V\$CEBPB_Q6    | C/EBPbeta            | CEBPB  | 0.198804   | 16         |
| V\$TCF4_Q5     | TCF-4                | TCF7L2 | 0.0204144  | 16         |
| V\$CEBPD_Q6    | C/EBPdelta           | CEBPD  | 0.0752722  | 16         |
| V\$AP2ALPHA_01 | AP-2alpha            | TFAP2A | 0.376872   | 15         |
| V\$AHR_Q5      | AhR                  | AHR    | 0.40502    | 14         |
| V\$AP2GAMMA_01 | AP-2gamma            | TFAP2C | 0.296112   | 6          |
| V\$RNF96_01    | RNF96                | TRIM28 | 0.00059289 | 3          |
| V\$XBP1_01     | XBP-1                | XBP1   | 0.133744   | 2          |

hsa-mir-143

| Matrix_id           | transcription factor | Gene   | PCC       | Occurrence |
|---------------------|----------------------|--------|-----------|------------|
| V\$PUR1_Q4          | PUR1                 | PURA   | 0.436133  | 27         |
| V\$GKLF_Q4          | GKLF                 | KLF4   | 0.237178  | 25         |
| V\$SMAD4_Q6_01      | Smad4                | SMAD4  | 0.185539  | 24         |
| V\$ELF1_Q6          | Elf-1                | ELF1   | 0.308795  | 23         |
| V\$GATA1_01         | GATA-1               | GATA1  | 0.145382  | 22         |
| V\$SOX9_B1          | SOX9                 | SOX9   | 0.217618  | 22         |
| V\$GR_Q6            | GR                   | NR3C1  | 0.301896  | 21         |
| V\$ZBP89_Q4         | ZBP89                | ZNF148 | 0.0292075 | 20         |
| V\$SRY_02           | SRY                  | SRY    | 0.061738  | 18         |
| V\$CMAF_01          | c-Maf                | MAF    | 0.0934531 | 16         |
| V\$AP2ALPHA_Q6      | AP-2alpha            | TFAP2A | 0.100039  | 15         |
| V\$HIF1A_Q6         | HIF-1alpha           | HIF1A  | 0.0628462 | 11         |
| V\$SPIB_03          | Spi-B                | SPIB   | 0.0543614 | 11         |
| V\$GR_01            | GR                   | NR3C1  | 0.301896  | 11         |
| V\$CACCCBINDINGFACT | CACCC-binding factor | ZNF148 | 0.0292075 | 11         |

|              |         |        |           |   |
|--------------|---------|--------|-----------|---|
| V\$SMAD4_Q6  | SMAD4   | SMAD4  | 0.185539  | 9 |
| V\$MAX_01    | Max     | MAX    | 0.189647  | 5 |
| V\$CTCF_02   | CTCF    | CTCF   | 0.235929  | 4 |
| V\$SREBP1_01 | SREBP-1 | SREBF1 | 0.0879663 | 4 |
| V\$CTCF_01   | CTCF    | CTCF   | 0.235929  | 3 |
| V\$CMYC_02   | c-Myc   | MYC    | 0.105553  | 3 |
| V\$MAX_Q6    | MAX     | MAX    | 0.189647  | 2 |

hsa-mir-145

| Matrix_id      | transcription factor | Gene   | PCC       | Occurrence |
|----------------|----------------------|--------|-----------|------------|
| V\$PUR1_Q4     | PUR1                 | PURA   | 0.312986  | 12         |
| V\$ELF1_Q6     | Elf-1                | ELF1   | 0.186542  | 12         |
| V\$SOX9_B1     | SOX9                 | SOX9   | 0.23151   | 11         |
| V\$AML1_Q6     | AML1                 | RUNX1  | 0.0166488 | 11         |
| V\$SMAD4_Q6_01 | Smad4                | SMAD4  | 0.158445  | 11         |
| V\$ETS1_B      | c-Ets-1              | ETS1   | 0.125711  | 11         |
| V\$GKLF_Q4     | GKLF                 | KLF4   | 0.323143  | 10         |
| V\$CETS1_Q6    | C-ets-1              | ETS1   | 0.125711  | 10         |
| V\$GATA1_01    | GATA-1               | GATA1  | 0.302754  | 10         |
| V\$Elf5_03     | ELF5                 | ELF5   | 0.132948  | 10         |
| V\$GR_Q6       | GR                   | NR3C1  | 0.17774   | 9          |
| V\$SR_Y02      | SR_Y                 | SR_Y   | 0.014206  | 9          |
| V\$AML1_01     | AML1a                | RUNX1  | 0.0166488 | 8          |
| V\$AML1_Q4     | AML1                 | RUNX1  | 0.0166488 | 7          |
| V\$ELF5_01     | ELF5                 | ELF5   | 0.132948  | 6          |
| V\$SPIB_03     | Spi-B                | SPIB   | 0.22183   | 6          |
| V\$GR_01       | GR                   | NR3C1  | 0.17774   | 6          |
| V\$AP2ALPHA_Q6 | AP-2alpha            | TFAP2A | 0.16682   | 5          |
| V\$TFII_Q6     | TFII-I               | GTF2I  | 0.0220585 | 4          |
| V\$SMAD4_Q6    | SMAD4                | SMAD4  | 0.158445  | 3          |
| V\$MAX_01      | Max                  | MAX    | 0.194661  | 3          |
| V\$SREBP1_01   | SREBP-1              | SREBF1 | 0.0726815 | 2          |
| V\$CMYC_02     | c-Myc                | MYC    | 0.122316  | 2          |
| V\$MAX_Q6      | MAX                  | MAX    | 0.194661  | 1          |
| V\$CTCF_02     | CTCF                 | CTCF   | 0.158113  | 1          |
| V\$CTCF_01     | CTCF                 | CTCF   | 0.158113  | 1          |

hsa-mir-146a

| Matrix_id | transcription factor | Gene | PCC | Occurrence |
|-----------|----------------------|------|-----|------------|
|-----------|----------------------|------|-----|------------|

|               |            |               |            |    |
|---------------|------------|---------------|------------|----|
| V\$IK_Q5      | Ikaros     | IKZF1         | 0.0517865  | 25 |
| V\$ELF1_Q6    | Elf-1      | ELF1          | 0.102942   | 23 |
| V\$HMG1Y_Q1   | HMG1Y      | HMG1A         | 0.0255429  | 23 |
| V\$Elf5_Q3    | ELF5       | ELF5          | 0.00601771 | 15 |
| V\$IRF7_Q3    | IRF-7      | IRF7          | 0.256817   | 13 |
| V\$IRF8_Q6    | IRF-8      | IRF8          | 0.795124   | 13 |
| V\$ELF5_Q1    | ELF5       | ELF5          | 0.00601771 | 12 |
| V\$ZABC1_Q1   | ZABC1      | ZNF217        | 0.135545   | 11 |
| V\$LEF1_Q5    | LEF-1      | LEF1          | 0.186332   | 11 |
| V\$HIF1A_Q6   | HIF-1alpha | HIF1A         | 0.0379595  | 9  |
| V\$AML2_Q3    | AML2       | RUNX3         | 0.358001   | 8  |
| V\$IRF7_Q1    | IRF-7      | IRF7          | 0.256817   | 7  |
| V\$SPIB_Q3    | Spi-B      | SPIB          | 0.328494   | 5  |
| V\$AML2_Q3_Q1 | AML2       | RUNX3         | 0.358001   | 4  |
| V\$OCAB_Q6    | OCA-B      | POU2AF1       | 0.944722   | 4  |
| V\$DEC2_Q2    |            | 2-Dec BHLHE41 | 0.0138589  | 3  |
| V\$CMYC_Q2    | c-Myc      | MYC           | 0.125937   | 2  |
| V\$CMYC_Q1    | c-Myc      | MYC           | 0.125937   | 2  |

hsa-mir-146b

| Matrix_id     | transcription factor | Gene  | PCC       | Occurrence |
|---------------|----------------------|-------|-----------|------------|
| V\$MAFB_Q1    | MAFB                 | MAFB  | 0.0188025 | 12         |
| V\$AML2_Q3    | AML2                 | RUNX3 | 0.253896  | 5          |
| V\$EGR1_Q2    | EGR-1                | EGR1  | 0.0164927 | 5          |
| V\$AML2_Q3_Q1 | AML2                 | RUNX3 | 0.253896  | 2          |
| V\$SP3_Q3     | Sp3                  | SP3   | 0.0352425 | 1          |

hsa-mir-148a

| Matrix_id     | transcription factor | Gene  | PCC       | Occurrence |
|---------------|----------------------|-------|-----------|------------|
| V\$SOX9_Q4    | SOX9                 | SOX9  | 0.0664914 | 39         |
| V\$ELF1_Q6    | Elf-1                | ELF1  | 0.0244017 | 38         |
| V\$MYOD_Q6_Q1 | MyoD                 | MYOD1 | 0.0444632 | 32         |
| V\$HNF3B_Q6   | HNF-3beta            | FOXA2 | 0.108646  | 32         |
| V\$GABPA_Q4   | GABP-alpha           | GABPA | 0.077227  | 31         |
| V\$SOX9_B1    | SOX9                 | SOX9  | 0.0664914 | 30         |
| V\$MYOD_Q6    | MyoD                 | MYOD1 | 0.0444632 | 24         |
| V\$MYOD_Q1    | MyoD                 | MYOD1 | 0.0444632 | 18         |

hsa-mir-148b

| Matrix_id    | transcription factor | Gene   | PCC        | Occurrence |
|--------------|----------------------|--------|------------|------------|
| V\$SOX9_Q4   | SOX9                 | SOX9   | 0.0243595  | 38         |
| V\$ELF1_Q6   | Elf-1                | ELF1   | 0.0744663  | 36         |
| V\$GATA3_02  | GATA-3               | GATA3  | 0.178762   | 33         |
| V\$GATA6_01  | GATA-6               | GATA6  | 0.00165737 | 33         |
| V\$DLX5_01   | dlx5                 | DLX5   | 0.15231    | 32         |
| V\$GABPA_Q4  | GABP-alpha           | GABPA  | 0.175519   | 30         |
| V\$SOX9_B1   | SOX9                 | SOX9   | 0.0243595  | 29         |
| V\$PITX3_Q2  | PITX3                | PITX3  | 0.103397   | 29         |
| V\$PITX2_Q2  | Pitx2                | PITX2  | 0.0415412  | 22         |
| V\$PITX2_01  | PITX2                | PITX2  | 0.0415412  | 21         |
| V\$HMG1Y_01  | HMG1Y                | HMGA1  | 0.0210428  | 21         |
| V\$GATA3_01  | GATA-3               | GATA3  | 0.178762   | 19         |
| V\$HBP1_Q2   | hbp1                 | HBP1   | 0.0530861  | 18         |
| V\$FOXO4_02  | FOXO4                | FOXO4  | 0.383679   | 16         |
| V\$AHR_Q5    | AhR                  | AHR    | 0.24791    | 15         |
| V\$HOX13_02  | HOXA5                | HOXA5  | 0.0211161  | 9          |
| V\$ESE1_Q3   | ESE-1                | ELF3   | 0.251442   | 8          |
| V\$CMYC_02   | c-Myc                | MYC    | 0.404479   | 5          |
| V\$CMYC_01   | c-Myc                | MYC    | 0.404479   | 5          |
| V\$ESE1_02   | ESE-1                | ELF3   | 0.251442   | 4          |
| V\$ERM_02    | Erm                  | ETV5   | 0.159448   | 4          |
| V\$SREBP1_01 | SREBP-1              | SREBF1 | 0.0629834  | 3          |

hsa-mir-149

| Matrix_id    | transcription factor | Gene  | PCC       | Occurrence |
|--------------|----------------------|-------|-----------|------------|
| V\$GKLF_Q4   | GKLF                 | KLF4  | 0.187456  | 51         |
| V\$PUR1_Q4   | PUR1                 | PURA  | 0.428863  | 50         |
| V\$PARP_Q4   | PARP                 | PARP1 | 0.403254  | 48         |
| V\$P300_01   | p300                 | EP300 | 0.134896  | 47         |
| V\$ELF1_Q6   | Elf-1                | ELF1  | 0.0681071 | 45         |
| V\$AHR_Q5    | AhR                  | AHR   | 0.498189  | 43         |
| V\$AP4_Q6_02 | AP-4                 | TFAP4 | 0.205621  | 42         |
| V\$SOX9_Q4   | SOX9                 | SOX9  | 0.145477  | 41         |
| V\$ZIC3_01   | Zic3                 | ZIC3  | 0.0722261 | 41         |
| V\$DLX5_01   | dlx5                 | DLX5  | 0.452318  | 40         |

|                |            |               |            |    |
|----------------|------------|---------------|------------|----|
| V\$GABPA_Q4    | GABP-alpha | GABPA         | 0.273087   | 39 |
| V\$ETS2_Q6     | c-Ets-2    | ETS2          | 0.0741151  | 38 |
| V\$SOX9_B1     | SOX9       | SOX9          | 0.145477   | 37 |
| V\$SP1_Q6      | Sp1        | SP1           | 0.0696733  | 36 |
| V\$YY1_Q6      | YY1        | YY1           | 0.3566     | 34 |
| V\$SP1_Q6_01   | Sp1        | SP1           | 0.0696733  | 34 |
| V\$SP1_01      | Sp1        | SP1           | 0.0696733  | 34 |
| V\$ETS2_B      | c-Ets-2    | ETS2          | 0.0741151  | 34 |
| V\$YY1_Q6_02   | YY1        | YY1           | 0.3566     | 33 |
| V\$SP1_Q4_01   | Sp1        | SP1           | 0.0696733  | 33 |
| V\$SP1_Q2_01   | Sp1        | SP1           | 0.0696733  | 33 |
| V\$SRY_02      | SRY        | SRY           | 0.0778808  | 32 |
| V\$MAZ_Q6      | MAZ        | MAZ           | 0.161334   | 32 |
| V\$SP1_02      | SP1        | SP1           | 0.0696733  | 30 |
| V\$AP4_Q5      | AP-4       | TFAP4         | 0.205621   | 28 |
| V\$PBX1_Q3     | Pbx1       | PBX1          | 0.140239   | 28 |
| V\$ARNT_01     | Arnt       | ARNT          | 0.0331279  | 27 |
| V\$TFII_Q6     | TFII-I     | GTF2I         | 0.191775   | 26 |
| V\$GATA3_01    | GATA-3     | GATA3         | 0.49408    | 26 |
| V\$LEF1_Q5     | LEF-1      | LEF1          | 0.0350501  | 25 |
| V\$AP2ALPHA_Q6 | AP-2alpha  | TFAP2A        | 0.471457   | 25 |
| V\$MAZ_Q6_01   | MAZ        | MAZ           | 0.161334   | 24 |
| V\$AP4_Q6      | AP-4       | TFAP4         | 0.205621   | 24 |
| V\$GFI1_Q6_01  | Gfi1       | GFI1          | 0.00013302 | 24 |
| V\$SP2_01      | SP2        | SP2           | 0.15121    | 24 |
| V\$IRF8_Q6     | IRF-8      | IRF8          | 0.0220163  | 23 |
| V\$GFI1_Q6     | Gfi1       | GFI1          | 0.00013302 | 23 |
| V\$AP2ALPHA_01 | AP-2alpha  | TFAP2A        | 0.471457   | 22 |
| V\$AP4_Q6_01   | AP-4       | TFAP4         | 0.205621   | 21 |
| V\$AP2GAMMA_01 | AP-2gamma  | TFAP2C        | 0.3899     | 20 |
| V\$CP2_01      | CP2        | TFCP2         | 0.570772   | 20 |
| V\$GATA2_01    | GATA-2     | GATA2         | 0.27693    | 20 |
| V\$TCF4_Q5     | TCF-4      | TCF7L2        | 0.158702   | 19 |
| V\$MSX1_01     | Msx-1      | MSX1          | 0.10026    | 17 |
| V\$NEUROD_02   | NeuroD     | NEUROD1       | 0.00970685 | 16 |
| V\$HOXB8_01    | HOXB8      | HOXB8         | 0.197998   | 15 |
| V\$RNF96_01    | RNF96      | TRIM28        | 0.225263   | 15 |
| V\$TCF4_01     | TCF-4      | TCF7L2        | 0.158702   | 15 |
| V\$ERM_02      | Erm        | ETV5          | 0.49386    | 14 |
| V\$DEC2_Q2     |            | 2-Dec BHLHE41 | 0.488862   | 13 |
| V\$AP2ALPHA_02 | AP-2alphaA | TFAP2A        | 0.471457   | 10 |
| V\$SREBP1_02   | SREBP-1    | SREBF1        | 0.185648   | 9  |
| V\$SP3_Q3      | Sp3        | SP3           | 0.133184   | 8  |
| V\$EGR2_01     | Egr-2      | EGR2          | 0.159986   | 8  |
| V\$SRF_Q6      | SRF        | SRF           | 0.180292   | 4  |
| V\$SRF_C       | SRF        | SRF           | 0.180292   | 4  |

|              |       |       |          |   |
|--------------|-------|-------|----------|---|
| V\$TGIF_01   | TGIF  | TGIF1 | 0.238161 | 4 |
| V\$SRF_Q4    | SRF   | SRF   | 0.180292 | 3 |
| V\$SRF_Q5_02 | SRF   | SRF   | 0.180292 | 3 |
| V\$BRF1_01   | BRF-1 | BRF1  | 0.139457 | 2 |
| V\$CDP_02    | CDP   | CUX1  | 0.288346 | 2 |

hsa-mir-150

| Matrix_id     | transcription factor | Gene  | PCC       | Occurrence |
|---------------|----------------------|-------|-----------|------------|
| V\$IK_Q5      | Ikaros               | IKZF1 | 0.057942  | 20         |
| V\$LEF1_Q5    | LEF-1                | LEF1  | 0.122083  | 13         |
| V\$IRF7_Q3    | IRF-7                | IRF7  | 0.243398  | 12         |
| V\$ING4_01    | ING4                 | ING4  | 0.0303228 | 10         |
| V\$AML2_Q3    | AML2                 | RUNX3 | 0.292784  | 7          |
| V\$STAT1_05   | STAT1                | STAT1 | 0.640702  | 6          |
| V\$AML2_Q3_01 | AML2                 | RUNX3 | 0.292784  | 3          |

hsa-mir-151a

| Matrix_id    | transcription factor | Gene  | PCC        | Occurrence |
|--------------|----------------------|-------|------------|------------|
| V\$P300_01   | p300                 | EP300 | 0.0303532  | 2          |
| V\$PARP_Q4   | PARP                 | PARP1 | 0.219812   | 2          |
| V\$AHR_Q5    | AhR                  | AHR   | 0.30269    | 2          |
| V\$YY1_Q6    | YY1                  | YY1   | 0.25437    | 2          |
| V\$GR_01     | GR                   | NR3C1 | 0.00377341 | 2          |
| V\$TBP_Q6    | TBP                  | TBP   | 0.088165   | 2          |
| V\$YY1_Q6_02 | YY1                  | YY1   | 0.25437    | 2          |
| V\$MAFB_01   | MAFB                 | MAFB  | 0.121702   | 2          |
| V\$DLX5_01   | dlx5                 | DLX5  | 0.249212   | 2          |
| V\$HMGY1_Q1  | HMGY1                | HMGY1 | 0.00700842 | 2          |
| V\$PUR1_Q4   | PUR1                 | PURA  | 0.42702    | 2          |
| V\$GKLF_Q4   | GKLF                 | KLF4  | 0.0749585  | 2          |
| V\$AP4_Q6_02 | AP-4                 | TFAP4 | 0.282611   | 2          |
| V\$CEBPB_Q6  | C/EBPbeta            | CEBPB | 0.00767225 | 2          |
| V\$CEBPG_Q6  | C/EBPgamma           | CEBPG | 0.359308   | 2          |
| V\$GR_Q6     | GR                   | NR3C1 | 0.00377341 | 2          |
| V\$GATA3_Q2  | GATA-3               | GATA3 | 0.165287   | 2          |
| V\$MSX1_Q1   | Msx-1                | MSX1  | 0.116278   | 2          |
| V\$SOX9_B1   | SOX9                 | SOX9  | 0.330123   | 2          |
| V\$ZIC1_Q1   | Zic1                 | ZIC1  | 0.654562   | 2          |

|                |           |        |            |   |
|----------------|-----------|--------|------------|---|
| V\$CP2_01      | CP2       | TFCP2  | 0.323954   | 2 |
| V\$ZIC3_01     | Zic3      | ZIC3   | 0.191712   | 2 |
| V\$GATA6_01    | GATA-6    | GATA6  | 0.0167044  | 2 |
| V\$GATA2_02    | GATA-2    | GATA2  | 0.139018   | 2 |
| V\$CDP_02      | CDP       | CUX1   | 0.183439   | 1 |
| V\$PITX3_Q2    | PITX3     | PITX3  | 0.090475   | 1 |
| V\$AP2ALPHA_Q6 | AP-2alpha | TFAP2A | 0.252345   | 1 |
| V\$YY1_01      | YY1       | YY1    | 0.25437    | 1 |
| V\$CEBPB_02    | C/EBPbeta | CEBPB  | 0.00767225 | 1 |
| V\$AP4_Q5      | AP-4      | TFAP4  | 0.282611   | 1 |
| V\$AP4_Q6      | AP-4      | TFAP4  | 0.282611   | 1 |
| V\$SOX9_Q4     | SOX9      | SOX9   | 0.330123   | 1 |
| V\$AP2ALPHA_01 | AP-2alpha | TFAP2A | 0.252345   | 1 |
| V\$AP4_Q6_01   | AP-4      | TFAP4  | 0.282611   | 1 |
| V\$SREBP1_Q6   | SREBP-1   | SREBF1 | 0.277848   | 1 |
| V\$AP2GAMMA_01 | AP-2gamma | TFAP2C | 0.179622   | 1 |
| V\$TFIIQ_Q6    | TFII-I    | GTF2I  | 0.085692   | 1 |

hsa-mir-152

| Matrix_id     | transcription factor | Gene   | PCC       | Occurrence |
|---------------|----------------------|--------|-----------|------------|
| V\$CETS1_Q6   | C-ets-1              | ETS1   | 0.320488  | 3          |
| V\$GFI1_Q6_01 | Gfi1                 | GFI1   | 0.19076   | 3          |
| V\$PEA3_Q6    | PEA3                 | ETV4   | 0.434564  | 3          |
| V\$HNF1_02    | HNF-1alpha           | HNF1A  | 0.185865  | 3          |
| V\$FOXM1_01   | FOXM1                | FOXM1  | 0.0731977 | 3          |
| V\$SOX9_Q4    | SOX9                 | SOX9   | 0.266525  | 3          |
| V\$GATA6_01   | GATA-6               | GATA6  | 0.357952  | 3          |
| V\$ZIC3_01    | Zic3                 | ZIC3   | 0.181275  | 3          |
| V\$YY1_Q6_02  | YY1                  | YY1    | 0.551921  | 3          |
| V\$EGR1_02    | EGR-1                | EGR1   | 0.260808  | 3          |
| V\$ETS2_Q6    | c-Ets-2              | ETS2   | 0.0998072 | 3          |
| V\$GKLF_Q4    | GKLF                 | KLF4   | 0.324423  | 3          |
| V\$TBP_Q6     | TBP                  | TBP    | 0.25147   | 3          |
| V\$GFI1_Q6    | Gfi1                 | GFI1   | 0.19076   | 3          |
| V\$NFAT4_Q3   | NF-AT4               | NFATC3 | 0.188429  | 3          |
| V\$ERBETA_Q5  | ER-beta              | ESR2   | 0.255675  | 3          |
| V\$AP4_Q6_02  | AP-4                 | TFAP4  | 0.336967  | 3          |
| V\$AML1_Q6    | AML1                 | RUNX1  | 0.485305  | 3          |
| V\$IK_Q5      | Ikaros               | IKZF1  | 0.201536  | 3          |
| V\$ELF1_Q6    | Elf-1                | ELF1   | 0.105662  | 3          |
| V\$GATA3_02   | GATA-3               | GATA3  | 0.178223  | 3          |
| V\$GATA2_02   | GATA-2               | GATA2  | 0.441808  | 3          |

|                   |            |         |           |   |
|-------------------|------------|---------|-----------|---|
| V\$PUR1_Q4        | PUR1       | PURA    | 0.359639  | 3 |
| V\$Elf5_Q3        | ELF5       | ELF5    | 0.334434  | 3 |
| V\$MYOGENIN_Q6_01 | myogenin   | MYOG    | 0.317573  | 3 |
| V\$NR1B2_Q6       | NR1B2      | RARB    | 0.436334  | 3 |
| V\$CDX2_Q5_02     | CDX-2      | CDX2    | 0.282579  | 3 |
| V\$P300_Q1        | p300       | EP300   | 0.469496  | 3 |
| V\$PBX1_Q3        | Pbx1       | PBX1    | 0.254089  | 3 |
| V\$ETS1_B         | c-Ets-1    | ETS1    | 0.320488  | 3 |
| V\$ETS2_B         | c-Ets-2    | ETS2    | 0.0998072 | 3 |
| V\$GATA1_Q5       | GATA-1     | GATA1   | 0.475638  | 3 |
| V\$GABPA_Q4       | GABP-alpha | GABPA   | 0.155834  | 3 |
| V\$AP2REP_Q1      | AP-2rep    | KLF12   | 0.398929  | 3 |
| V\$PARP_Q4        | PARP       | PARP1   | 0.218495  | 3 |
| V\$GATA1_Q6       | GATA-1     | GATA1   | 0.475638  | 3 |
| V\$PITX1_Q1       | Pitx1      | PITX1   | 0.362019  | 2 |
| V\$PITX3_Q2       | PITX3      | PITX3   | 0.354173  | 2 |
| V\$SOX10_Q6       | SOX10      | SOX10   | 0.0826294 | 2 |
| V\$CDX2_Q5_01     | Cdx-2      | CDX2    | 0.282579  | 2 |
| V\$CRX_Q4         | Crx        | CRX     | 0.29134   | 2 |
| V\$CDX2_Q1        | Cdx-2      | CDX2    | 0.282579  | 2 |
| V\$PITX2_Q1       | PITX2      | PITX2   | 0.407729  | 2 |
| V\$PBX1_Q4        | Pbx1       | PBX1    | 0.254089  | 2 |
| V\$CMYB_Q5        | c-Myb      | MYB     | 0.0226967 | 2 |
| V\$ZABC1_Q1       | ZABC1      | ZNF217  | 0.248275  | 2 |
| V\$IPF1_Q6        | IPF1       | PDX1    | 0.36999   | 2 |
| V\$HNF3A_Q1       | HNF3A      | FOXA1   | 0.441391  | 2 |
| V\$NEUROD_Q2      | NeuroD     | NEUROD1 | 0.289105  | 2 |
| V\$HOXD9_Q2       | Hoxd9      | HOXD9   | 0.387976  | 2 |
| V\$DLX5_Q1        | dlx5       | DLX5    | 0.242626  | 2 |
| V\$IPF1_Q1        | IPF1       | PDX1    | 0.36999   | 2 |
| V\$CRX_Q2         | Crx        | CRX     | 0.29134   | 2 |
| V\$PARP_Q3        | PARP       | PARP1   | 0.218495  | 2 |
| V\$CMAF_Q1        | c-Maf      | MAF     | 0.242116  | 2 |
| V\$GABPBETA_Q3    | GABP-beta  | GABPB1  | 0.664999  | 2 |
| V\$SOX9_B1        | SOX9       | SOX9    | 0.266525  | 2 |
| V\$MSX1_Q1        | Msx-1      | MSX1    | 0.188119  | 2 |
| V\$GATA3_Q3       | GATA-3     | GATA3   | 0.178223  | 2 |
| V\$SRY_Q2         | SRY        | SRY     | 0.301153  | 2 |
| V\$SMAD3_Q6_01    | Smad3      | SMAD3   | 0.304218  | 2 |
| V\$GR_Q6          | GR         | NR3C1   | 0.480127  | 2 |
| V\$MYB_Q6         | c-Myb      | MYB     | 0.0226967 | 2 |
| V\$GATA1_Q4       | GATA-1     | GATA1   | 0.475638  | 2 |
| V\$GATA1_Q2       | GATA-1     | GATA1   | 0.475638  | 2 |
| V\$YY1_Q1         | YY1        | YY1     | 0.551921  | 2 |
| V\$CREL_Q1        | c-Rel      | REL     | 0.185866  | 2 |
| V\$SOX5_Q1        | SOX5       | SOX5    | 0.289029  | 2 |



|                     |                      |              |          |   |
|---------------------|----------------------|--------------|----------|---|
| V\$MAFK_Q3          | MafK                 | MAFK         | 0.411822 | 2 |
| V\$PITX2_Q2         | Pitx2                | PITX2        | 0.407729 | 2 |
| V\$SREBP1_Q6        | SREBP-1              | SREBF1       | 0.389292 | 2 |
| V\$PIT1_Q6          | Pit-1                | POU1F1       | 0.264037 | 2 |
| V\$SMAD4_Q6         | SMAD4                | SMAD4        | 0.59101  | 2 |
| V\$YY1_Q6_Q3        | YY1                  | YY1          | 0.551921 | 2 |
| V\$CACCCBINDINGFACT | CACCC-binding factor | ZNF148       | 0.388971 | 2 |
| V\$IRF4_Q6          | IRF-4                | IRF4         | 0.411362 | 2 |
| V\$MAZ_Q6           | MAZ                  | MAZ          | 0.205731 | 2 |
| V\$IPF1_Q4_Q1       | IPF1                 | PDX1         | 0.36999  | 2 |
| V\$SMAD4_Q6_Q1      | Smad4                | SMAD4        | 0.59101  | 2 |
| V\$ARNT_Q1          | Arnt                 | ARNT         | 0.414906 | 1 |
| V\$EAR2_Q2          | EAR2                 | NR2F6        | 0.134678 | 1 |
| V\$NFAT2_Q5         | NF-AT2               | NFATC1       | 0.450634 | 1 |
| V\$MITF_Q6          | MITF                 | MITF         | 0.293741 | 1 |
| V\$HTF4_Q2          | HTF4                 | TCF12        | 0.387049 | 1 |
| V\$AML2_Q1          | AML2                 | RUNX3        | 0.150722 | 1 |
| V\$HIF1A_Q6         | HIF-1alpha           | HIF1A        | 0.509226 | 1 |
| V\$MAX_Q6           | MAX                  | MAX          | 0.189309 | 1 |
| V\$HNF4A_Q6_Q1      | HNF-4alpha           | HNF4A        | 0.146194 | 1 |
| V\$CRX_Q4_Q1        | CRX                  | CRX          | 0.29134  | 1 |
| V\$HBP1_Q2          | hbp1                 | HBP1         | 0.384163 | 1 |
| V\$E2A_Q2           | E2A                  | TCF3         | 0.369155 | 1 |
| V\$CDX2_Q5          | Cdx-2                | CDX2         | 0.282579 | 1 |
| V\$USF2_Q6          | USF2                 | USF2         | 0.380066 | 1 |
| V\$MYOGENIN_Q6      | myogenin             | MYOG         | 0.317573 | 1 |
| V\$E12_Q6           | E12                  | TCF3         | 0.369155 | 1 |
| V\$ARNT_Q2          | Arnt                 | ARNT         | 0.414906 | 1 |
| V\$MYOD_Q1          | MyoD                 | MYOD1        | 0.142649 | 1 |
| V\$FOXJ2_Q1         | FOXJ2                | FOXJ2        | 0.590845 | 1 |
| V\$GATA2_Q3         | GATA-2               | GATA2        | 0.441808 | 1 |
| V\$AML1_Q1          | AML1a                | RUNX1        | 0.485305 | 1 |
| V\$MYOD_Q6          | MyoD                 | MYOD1        | 0.142649 | 1 |
| V\$MAX_Q1           | Max                  | MAX          | 0.189309 | 1 |
| V\$E47_Q2           | E47                  | TCF3         | 0.369155 | 1 |
| V\$NMYC_Q1          | N-Myc                | MYCN         | 0.292955 | 1 |
| V\$MYOD_Q6_Q1       | MyoD                 | MYOD1        | 0.142649 | 1 |
| V\$GR_Q1            | GR                   | NR3C1        | 0.480127 | 1 |
| V\$AML1_Q4          | AML1                 | RUNX1        | 0.485305 | 1 |
| V\$HMGIIY_Q1        | HMGIIY               | HMGA1        | 0.12409  | 1 |
| V\$TCF3_Q1          | TCF-3                | TCF7L1       | 0.321965 | 1 |
| V\$CDX1_Q1          | Cdx-1                | CDX1         | 0.258243 | 1 |
| V\$OCT2_Q1          |                      | 2-Oct POU2F2 | 0.393043 | 1 |
| V\$HOXA9_Q1         | hoxa9                | HOXA9        | 0.324687 | 1 |
| V\$NANOG_Q2         | Nanog                | NANOG        | 0.344827 | 1 |
| V\$IPF1_Q2          | IPF1                 | PDX1         | 0.36999  | 1 |

|             |       |       |          |   |
|-------------|-------|-------|----------|---|
| V\$ELF5_01  | ELF5  | ELF5  | 0.334434 | 1 |
| V\$CMYC_02  | c-Myc | MYC   | 0.103898 | 1 |
| V\$GFI1B_01 | Gfi1b | GFI1B | 0.310299 | 1 |
| V\$TBX5_02  | TBX5  | TBX5  | 0.369802 | 1 |
| V\$TBX5_01  | TBX5  | TBX5  | 0.369802 | 1 |
| V\$E2A_Q6   | E2A   | TCF3  | 0.369155 | 1 |
| V\$E47_01   | E47   | TCF3  | 0.369155 | 1 |

hsa-mir-153-1

| Matrix_id      | transcription factor | Gene    | PCC        | Occurrence |
|----------------|----------------------|---------|------------|------------|
| V\$PUR1_Q4     | PUR1                 | PURA    | 0.340461   | 393        |
| V\$MAFB_01     | MAFB                 | MAFB    | 0.0504199  | 365        |
| V\$PARP_Q4     | PARP                 | PARP1   | 0.369141   | 363        |
| V\$SOX9_Q4     | SOX9                 | SOX9    | 0.351227   | 313        |
| V\$TBP_Q6      | TBP                  | TBP     | 0.0125622  | 313        |
| V\$YY1_01      | YY1                  | YY1     | 0.0131308  | 287        |
| V\$MEF2C_Q4    | MEF-2C               | MEF2C   | 0.761938   | 278        |
| V\$DLX5_01     | dlx5                 | DLX5    | 0.0303345  | 268        |
| V\$YY1_Q6      | YY1                  | YY1     | 0.0131308  | 264        |
| V\$ETS2_B      | c-Ets-2              | ETS2    | 0.145157   | 264        |
| V\$SOX9_B1     | SOX9                 | SOX9    | 0.351227   | 261        |
| V\$SRY_02      | SRY                  | SRY     | 0.148964   | 240        |
| V\$PARP_Q3     | PARP                 | PARP1   | 0.369141   | 240        |
| V\$TFII-I_Q6   | TFII-I               | GTF2I   | 0.140021   | 232        |
| V\$HNF3B_Q6    | HNF-3beta            | FOXA2   | 0.024515   | 227        |
| V\$FOXO3A_Q1   | FOXO3A               | FOXO3   | 0.00467824 | 217        |
| V\$PBX1_04     | Pbx1                 | PBX1    | 0.189042   | 215        |
| V\$PITX3_Q2    | PITX3                | PITX3   | 0.0598077  | 213        |
| V\$HIF1A_Q6    | HIF-1alpha           | HIF1A   | 0.0258937  | 203        |
| V\$YY1_Q6_03   | YY1                  | YY1     | 0.0131308  | 201        |
| V\$IRF8_Q6     | IRF-8                | IRF8    | 0.0641219  | 178        |
| V\$SOX10_Q6    | SOX10                | SOX10   | 0.713636   | 166        |
| V\$NEUROD_02   | NeuroD               | NEUROD1 | 0.0689893  | 142        |
| V\$E2F1_Q3     | E2F-1                | E2F1    | 0.0999082  | 140        |
| V\$CEBPG_Q6_01 | C/EBPgamma           | CEBPG   | 0.140519   | 129        |
| V\$NKX2B_Q3    | NKX2B                | NKX2-2  | 0.837286   | 126        |
| V\$NKX22_02    | NKX2B                | NKX2-2  | 0.837286   | 123        |
| V\$MEF2A_Q6    | mef2A                | MEF2A   | 0.629138   | 122        |
| V\$E2F1_Q6     | E2F-1                | E2F1    | 0.0999082  | 110        |
| V\$MSX1_01     | Msx-1                | MSX1    | 0.121858   | 102        |
| V\$SOX2_Q6     | SOX2                 | SOX2    | 0.491028   | 66         |
| V\$CEBPG_Q6    | C/EBPgamma           | CEBPG   | 0.140519   | 56         |

hsa-mir-153-2

| Matrix_id    | transcription factor | Gene   | PCC        | Occurrence |
|--------------|----------------------|--------|------------|------------|
| V\$PUR1_Q4   | PUR1                 | PURA   | 0.340461   | 393        |
| V\$MAFB_Q1   | MAFB                 | MAFB   | 0.0504199  | 365        |
| V\$PARP_Q4   | PARP                 | PARP1  | 0.369141   | 363        |
| V\$ZIC3_Q1   | Zic3                 | ZIC3   | 0.184233   | 357        |
| V\$ETS2_Q6   | c-Ets-2              | ETS2   | 0.145157   | 324        |
| V\$GABPA_Q4  | GABP-alpha           | GABPA  | 0.106234   | 315        |
| V\$SOX9_Q4   | SOX9                 | SOX9   | 0.351227   | 313        |
| V\$TBP_Q6    | TBP                  | TBP    | 0.0125622  | 313        |
| V\$MAZ_Q6    | MAZ                  | MAZ    | 0.171243   | 296        |
| V\$YY1_Q1    | YY1                  | YY1    | 0.0131308  | 287        |
| V\$AP4_Q6_Q2 | AP-4                 | TFAP4  | 0.397559   | 286        |
| V\$MEF2C_Q4  | MEF-2C               | MEF2C  | 0.761938   | 278        |
| V\$DLX5_Q1   | dlx5                 | DLX5   | 0.0303345  | 268        |
| V\$ETS2_B    | c-Ets-2              | ETS2   | 0.145157   | 264        |
| V\$SOX9_B1   | SOX9                 | SOX9   | 0.351227   | 261        |
| V\$SRY_Q2    | SRY                  | SRY    | 0.148964   | 240        |
| V\$PARP_Q3   | PARP                 | PARP1  | 0.369141   | 240        |
| V\$ZBP89_Q4  | ZBP89                | ZNF148 | 0.074935   | 237        |
| V\$TFII_Q6   | TFII-I               | GTF2I  | 0.140021   | 232        |
| V\$ING4_Q1   | ING4                 | ING4   | 0.555058   | 229        |
| V\$HNF3B_Q6  | HNF-3beta            | FOXA2  | 0.024515   | 227        |
| V\$FOXO3A_Q1 | FOXO3A               | FOXO3  | 0.00467824 | 217        |
| V\$PITX3_Q2  | PITX3                | PITX3  | 0.0598077  | 213        |
| V\$MAZ_Q6_Q1 | MAZ                  | MAZ    | 0.171243   | 207        |
| V\$HIF1A_Q6  | HIF-1alpha           | HIF1A  | 0.0258937  | 203        |
| V\$AP4_Q5    | AP-4                 | TFAP4  | 0.397559   | 200        |
| V\$CREM_Q6   | CREM                 | CREM   | 0.0211417  | 173        |
| V\$EGR1_Q2   | EGR-1                | EGR1   | 0.0343084  | 172        |
| V\$SOX10_Q6  | SOX10                | SOX10  | 0.713636   | 166        |
| V\$ZIC1_Q1   | Zic1                 | ZIC1   | 0.912365   | 139        |
| V\$NKX2B_Q3  | NKX2B                | NKX2-2 | 0.837286   | 126        |
| V\$NKX22_Q2  | NKX2B                | NKX2-2 | 0.837286   | 123        |
| V\$MEF2A_Q6  | mef2A                | MEF2A  | 0.629138   | 122        |
| V\$ELK1_Q1   | Elk-1                | ELK1   | 0.0758934  | 102        |
| V\$ATF4_Q6   | ATF-4                | ATF4   | 0.0646993  | 101        |
| V\$USF2_Q6   | USF2                 | USF2   | 0.244189   | 76         |
| V\$MAX_Q1    | Max                  | MAX    | 0.424959   | 74         |
| V\$SOX2_Q6   | SOX2                 | SOX2   | 0.491028   | 66         |
| V\$CEBPG_Q6  | C/EBPgamma           | CEBPG  | 0.140519   | 56         |

hsa-mir-154

| Matrix_id      | transcription factor | Gene    | PCC       | Occurrence |
|----------------|----------------------|---------|-----------|------------|
| V\$MAFB_Q1     | MAFB                 | MAFB    | 0.171488  | 26         |
| V\$GKLF_Q4     | GKLF                 | KLF4    | 0.382525  | 26         |
| V\$PUR1_Q4     | PUR1                 | PURA    | 0.0511859 | 26         |
| V\$ELF1_Q6     | Elf-1                | ELF1    | 0.0648347 | 25         |
| V\$PARP_Q4     | PARP                 | PARP1   | 0.0927483 | 25         |
| V\$PEA3_Q6     | PEA3                 | ETV4    | 0.109329  | 24         |
| V\$P300_Q1     | p300                 | EP300   | 0.221685  | 23         |
| V\$SMAD4_Q6_Q1 | Smad4                | SMAD4   | 0.151727  | 22         |
| V\$GABPA_Q4    | GABP-alpha           | GABPA   | 0.274004  | 20         |
| V\$GR_Q6       | GR                   | NR3C1   | 0.0439713 | 19         |
| V\$GATA3_Q1    | GATA-3               | GATA3   | 0.648057  | 18         |
| V\$YY1_Q1      | YY1                  | YY1     | 0.322823  | 18         |
| V\$ERBETA_Q5   | ER-beta              | ESR2    | 0.0020106 | 17         |
| V\$GATA2_Q1    | GATA-2               | GATA2   | 0.438894  | 17         |
| V\$AP2ALPHA_Q6 | AP-2alpha            | TFAP2A  | 0.685194  | 16         |
| V\$YY1_Q6      | YY1                  | YY1     | 0.322823  | 16         |
| V\$YY1_Q6_Q2   | YY1                  | YY1     | 0.322823  | 15         |
| V\$AHR_Q5      | AhR                  | AHR     | 0.65753   | 15         |
| V\$FOXP3_Q1    | FOXP3                | FOXP3   | 0.0177845 | 14         |
| V\$PBX1_Q4     | Pbx1                 | PBX1    | 0.106296  | 14         |
| V\$ATF3_Q6_Q1  | ATF-3                | ATF3    | 0.352309  | 12         |
| V\$CREM_Q6     | CREM                 | CREM    | 0.476714  | 12         |
| V\$SMAD4_Q6    | SMAD4                | SMAD4   | 0.151727  | 11         |
| V\$PIT1_Q6     | Pit-1                | POU1F1  | 0.123327  | 10         |
| V\$GABPBETA_Q3 | GABP-beta            | GABPB1  | 0.184879  | 10         |
| V\$GR_Q1       | GR                   | NR3C1   | 0.0439713 | 10         |
| V\$YY1_Q2      | YY1                  | YY1     | 0.322823  | 9          |
| V\$ATF4_Q6     | ATF-4                | ATF4    | 0.0622201 | 9          |
| V\$OC2_Q3      | OC-2                 | ONECUT2 | 0.0558151 | 8          |
| V\$TCF4_Q1     | TCF-4                | TCF7L2  | 0.279164  | 7          |
| V\$CEBPB_Q2    | C/EBPbeta            | CEBPB   | 0.497467  | 7          |
| V\$MAFK_Q3     | MafK                 | MAFK    | 0.358422  | 6          |
| V\$ELK1_Q1     | Elk-1                | ELK1    | 0.178428  | 5          |

hsa-mir-155

| Matrix_id | transcription factor | Gene | PCC | Occurrence |
|-----------|----------------------|------|-----|------------|
|-----------|----------------------|------|-----|------------|

|               |            |       |            |    |
|---------------|------------|-------|------------|----|
| V\$IK_Q5      | Ikaros     | IKZF1 | 0.0558765  | 23 |
| V\$GFI1_Q6_01 | Gfi1       | GFI1  | 0.0131647  | 17 |
| V\$SPI1_Q3    | SPI1       | SPI1  | 0.0276305  | 16 |
| V\$GFI1_Q6    | Gfi1       | GFI1  | 0.0131647  | 16 |
| V\$SPI1_Q5    | SPI1       | SPI1  | 0.0276305  | 15 |
| V\$IRF7_Q3    | IRF-7      | IRF7  | 0.305614   | 13 |
| V\$LEF1_Q5    | LEF-1      | LEF1  | 0.197306   | 13 |
| V\$STAT1_Q5   | STAT1      | STAT1 | 0.679087   | 8  |
| V\$HIF1A_Q6   | HIF-1alpha | HIF1A | 0.0201737  | 8  |
| V\$SPIB_Q3    | Spi-B      | SPIB  | 0.32805    | 5  |
| V\$CTCF_Q2    | CTCF       | CTCF  | 0.00122013 | 2  |
| V\$SP3_Q3     | Sp3        | SP3   | 0.136373   | 2  |

hsa-mir-15a

| Matrix_id     | transcription factor | Gene    | PCC       | Occurrence |
|---------------|----------------------|---------|-----------|------------|
| V\$CDX2_Q5_Q2 | CDX-2                | CDX2    | 0.290434  | 2          |
| V\$HNF1B_Q1   | HNF-1beta            | HNF1B   | 0.0320753 | 2          |
| V\$PARP_Q3    | PARP                 | PARP1   | 0.447241  | 2          |
| V\$ETS2_Q6    | c-Ets-2              | ETS2    | 0.382401  | 2          |
| V\$NKX32_Q1   | Nkx3-2               | NKX3-2  | 0.276649  | 2          |
| V\$IK_Q5      | Ikaros               | IKZF1   | 0.59559   | 2          |
| V\$IPF1_Q4_Q1 | IPF1                 | PDX1    | 0.266586  | 2          |
| V\$TBP_Q6     | TBP                  | TBP     | 0.0817948 | 2          |
| V\$GR_Q1      | GR                   | NR3C1   | 0.340357  | 2          |
| V\$AHR_Q5     | AhR                  | AHR     | 0.0432753 | 2          |
| V\$ELF1_Q6    | Elf-1                | ELF1    | 0.238781  | 2          |
| V\$IPF1_Q6    | IPF1                 | PDX1    | 0.266586  | 2          |
| V\$HNF1_Q2    | HNF-1alpha           | HNF1A   | 0.0424573 | 2          |
| V\$SPI1_Q5    | SPI1                 | SPI1    | 0.180726  | 2          |
| V\$PARP_Q4    | PARP                 | PARP1   | 0.447241  | 2          |
| V\$LEF1_Q5    | LEF-1                | LEF1    | 0.561067  | 2          |
| V\$NFAT4_Q3   | NF-AT4               | NFATC3  | 0.65541   | 2          |
| V\$CETS1_Q6   | C-ets-1              | ETS1    | 0.131715  | 2          |
| V\$CMYB_Q5    | c-Myb                | MYB     | 0.54124   | 2          |
| V\$PUR1_Q4    | PUR1                 | PURA    | 0.155779  | 2          |
| V\$HBP1_Q2    | hbp1                 | HBP1    | 0.239023  | 2          |
| V\$OC2_Q3     | OC-2                 | ONECUT2 | 0.193749  | 2          |
| V\$NKX32_Q2   | Nkx3-2               | NKX3-2  | 0.276649  | 2          |
| V\$PEA3_Q6    | PEA3                 | ETV4    | 0.267836  | 2          |
| V\$AP2REP_Q1  | AP-2rep              | KLF12   | 0.335061  | 2          |
| V\$GATA1_Q1   | GATA-1               | GATA1   | 0.0703413 | 2          |

|                |           |        |            |   |
|----------------|-----------|--------|------------|---|
| V\$GATA1_05    | GATA-1    | GATA1  | 0.0703413  | 2 |
| V\$GATA1_06    | GATA-1    | GATA1  | 0.0703413  | 2 |
| V\$GATA2_02    | GATA-2    | GATA2  | 0.256038   | 2 |
| V\$GATA3_02    | GATA-3    | GATA3  | 0.277486   | 2 |
| V\$ETS1_B      | c-Ets-1   | ETS1   | 0.131715   | 2 |
| V\$IPF1_Q4     | IPF1      | PDX1   | 0.266586   | 2 |
| V\$ETS2_B      | c-Ets-2   | ETS2   | 0.382401   | 2 |
| V\$FAC1_01     | FAC1      | BPTF   | 0.00474533 | 2 |
| V\$MYB_Q6      | c-Myb     | MYB    | 0.54124    | 2 |
| V\$GR_Q6       | GR        | NR3C1  | 0.340357   | 2 |
| V\$CMYB_01     | c-Myb     | MYB    | 0.54124    | 2 |
| V\$YY1_01      | YY1       | YY1    | 0.308855   | 2 |
| V\$P300_01     | p300      | EP300  | 0.252043   | 2 |
| V\$SRY_02      | SRY       | SRY    | 0.0738644  | 1 |
| V\$PITX1_01    | Pitx1     | PITX1  | 0.353794   | 1 |
| V\$PITX3_Q2    | PITX3     | PITX3  | 0.292916   | 1 |
| V\$EAR2_Q2     | EAR2      | NR2F6  | 0.120794   | 1 |
| V\$GATA1_04    | GATA-1    | GATA1  | 0.0703413  | 1 |
| V\$CRX_Q4_01   | CRX       | CRX    | 0.143287   | 1 |
| V\$FOXP3_01    | FOXP3     | FOXP3  | 0.330726   | 1 |
| V\$HMGY1_01    | HMGY1     | HMGA1  | 0.249707   | 1 |
| V\$AML1_Q4     | AML1      | RUNX1  | 0.307339   | 1 |
| V\$IRF8_Q6     | IRF-8     | IRF8   | 0.535904   | 1 |
| V\$AML2_01     | AML2      | RUNX3  | 0.455899   | 1 |
| V\$CDX2_Q5_01  | Cdx-2     | CDX2   | 0.290434   | 1 |
| V\$NKX2B_Q3    | NKX2B     | NKX2-2 | 0.0533756  | 1 |
| V\$SPI1_03     | SPI1      | SPI1   | 0.180726   | 1 |
| V\$SPIB_03     | Spi-B     | SPIB   | 0.320968   | 1 |
| V\$MEF2C_Q4    | MEF-2C    | MEF2C  | 0.150013   | 1 |
| V\$GATA1_02    | GATA-1    | GATA1  | 0.0703413  | 1 |
| V\$HNF3B_Q6    | HNF-3beta | FOXA2  | 0.208908   | 1 |
| V\$GFI1_Q6_01  | Gfi1      | GFI1   | 0.621768   | 1 |
| V\$LHX3b_01    | LHX3b     | LHX3   | 0.266134   | 1 |
| V\$GATA2_01    | GATA-2    | GATA2  | 0.256038   | 1 |
| V\$IRF4_Q6     | IRF-4     | IRF4   | 0.310614   | 1 |
| V\$GABPBETA_Q3 | GABP-beta | GABPB1 | 0.156605   | 1 |
| V\$GATA3_01    | GATA-3    | GATA3  | 0.277486   | 1 |
| V\$HOXA13_02   | HOXA5     | HOXA5  | 0.281354   | 1 |
| V\$CDX2_01     | Cdx-2     | CDX2   | 0.290434   | 1 |
| V\$PITX2_01    | PITX2     | PITX2  | 0.31012    | 1 |
| V\$KAISO_01    | KAISO     | ZBTB33 | 0.347212   | 1 |
| V\$FOXJ2_01    | FOXJ2     | FOXJ2  | 0.26646    | 1 |
| V\$PIT1_Q6     | Pit-1     | POU1F1 | 0.00787537 | 1 |
| V\$AML1_Q6     | AML1      | RUNX1  | 0.307339   | 1 |
| V\$POU3F2_02   | POU3F2    | POU3F2 | 0.342984   | 1 |
| V\$POU6F1_01   | POU6F1    | POU6F1 | 0.109321   | 1 |

|              |            |         |           |   |
|--------------|------------|---------|-----------|---|
| V\$HNF6_Q6   | HNF6       | ONECUT1 | 0.0116368 | 1 |
| V\$FOXM1_01  | FOXM1      | FOXM1   | 0.261817  | 1 |
| V\$CRX_Q4    | Crx        | CRX     | 0.143287  | 1 |
| V\$CEBPD_Q6  | C/EBPdelta | CEBPD   | 0.201812  | 1 |
| V\$AFP1_Q6   | AFP1       | ZFHX3   | 0.393896  | 1 |
| V\$PITX2_Q2  | Pitx2      | PITX2   | 0.31012   | 1 |
| V\$FOXO4_02  | FOXO4      | FOXO4   | 0.0554914 | 1 |
| V\$SOX10_Q6  | SOX10      | SOX10   | 0.070614  | 1 |
| V\$FOXO3A_Q1 | FOXO3A     | FOXO3   | 0.44777   | 1 |
| V\$GATA2_03  | GATA-2     | GATA2   | 0.256038  | 1 |
| V\$IPF1_06   | ipf1       | PDX1    | 0.266586  | 1 |
| V\$CRX_02    | Crx        | CRX     | 0.143287  | 1 |
| V\$IPF1_01   | IPF1       | PDX1    | 0.266586  | 1 |
| V\$DLX5_01   | dlx5       | DLX5    | 0.0411586 | 1 |
| V\$AML1_01   | AML1a      | RUNX1   | 0.307339  | 1 |
| V\$NKX22_02  | NKX2B      | NKX2-2  | 0.0533756 | 1 |
| V\$CART1_02  | CART1      | ALX1    | 0.267248  | 1 |
| V\$CDP_04    | CDP        | CUX1    | 0.125381  | 1 |
| V\$NURR1_Q3  | NURR1      | NR4A2   | 0.0492048 | 1 |
| V\$HNF3A_01  | HNF3A      | FOXA1   | 0.358573  | 1 |
| V\$STAT1_05  | STAT1      | STAT1   | 0.462315  | 1 |
| V\$NANOG_02  | Nanog      | NANOG   | 0.291514  | 1 |
| V\$IPF1_03   | IPF1       | PDX1    | 0.266586  | 1 |
| V\$FOXO4_01  | FOXO4      | FOXO4   | 0.0554914 | 1 |

hsa-mir-15b

| Matrix_id    | transcription factor | Gene   | PCC       | Occurrence |
|--------------|----------------------|--------|-----------|------------|
| V\$ELF1_Q6   | Elf-1                | ELF1   | 0.329838  | 7          |
| V\$IK_Q5     | Ikaros               | IKZF1  | 0.141912  | 7          |
| V\$GKLF_Q4   | GKLF                 | KLF4   | 0.155463  | 7          |
| V\$NFAT4_Q3  | NF-AT4               | NFATC3 | 0.499334  | 7          |
| V\$PARP_Q4   | PARP                 | PARP1  | 0.0279517 | 7          |
| V\$YY1_01    | YY1                  | YY1    | 0.151964  | 6          |
| V\$CMYB_Q5   | c-Myb                | MYB    | 0.567284  | 6          |
| V\$DLX5_01   | dlx5                 | DLX5   | 0.0725963 | 6          |
| V\$MYB_Q6    | c-Myb                | MYB    | 0.567284  | 6          |
| V\$IRF8_Q6   | IRF-8                | IRF8   | 0.31015   | 6          |
| V\$TBP_Q6    | TBP                  | TBP    | 0.235425  | 6          |
| V\$CREM_Q6   | CREM                 | CREM   | 0.0819696 | 5          |
| V\$HMGIIY_01 | HMGIIY               | HMGA1  | 0.700652  | 5          |
| V\$YY1_Q6_02 | YY1                  | YY1    | 0.151964  | 5          |
| V\$YY1_Q6    | YY1                  | YY1    | 0.151964  | 5          |

|                |            |        |           |   |
|----------------|------------|--------|-----------|---|
| V\$AML1_Q6     | AML1       | RUNX1  | 0.0470122 | 5 |
| V\$YY1_02      | YY1        | YY1    | 0.151964  | 5 |
| V\$SP2_01      | SP2        | SP2    | 0.0324013 | 5 |
| V\$CEBPD_Q6    | C/EBPdelta | CEBPD  | 0.0421394 | 4 |
| V\$AML1_Q4     | AML1       | RUNX1  | 0.0470122 | 4 |
| V\$YY1_03      | YY1        | YY1    | 0.151964  | 4 |
| V\$GATA3_01    | GATA-3     | GATA3  | 0.300141  | 4 |
| V\$AML1_01     | AML1a      | RUNX1  | 0.0470122 | 4 |
| V\$GFI1_Q6     | Gfi1       | GFI1   | 0.483537  | 4 |
| V\$PARP_Q3     | PARP       | PARP1  | 0.0279517 | 4 |
| V\$IRF7_Q3     | IRF-7      | IRF7   | 0.177883  | 3 |
| V\$CEBPG_Q6_01 | C/EBPgamma | CEBPG  | 0.210753  | 3 |
| V\$GFI1_Q6_01  | Gfi1       | GFI1   | 0.483537  | 3 |
| V\$SOX9_B1     | SOX9       | SOX9   | 0.0811999 | 3 |
| V\$STAT1_05    | STAT1      | STAT1  | 0.126554  | 3 |
| V\$RNF96_01    | RNF96      | TRIM28 | 0.531227  | 3 |
| V\$FOXM1_01    | FOXM1      | FOXM1  | 0.653598  | 3 |
| V\$CP2_01      | CP2        | TFCP2  | 0.0255312 | 2 |
| V\$GATA3_02    | GATA-3     | GATA3  | 0.300141  | 2 |
| V\$HOX13_02    | HOXA5      | HOXA5  | 0.0701904 | 2 |
| V\$GATA6_01    | GATA-6     | GATA6  | 0.035831  | 2 |
| V\$STAT3_01    | STAT3      | STAT3  | 0.0769405 | 1 |
| V\$SPIB_03     | Spi-B      | SPIB   | 0.0496612 | 1 |

hsa-mir-16-1

| Matrix_id   | transcription factor | Gene  | PCC       | Occurrence |
|-------------|----------------------|-------|-----------|------------|
| V\$PITX2_01 | PITX2                | PITX2 | 0.0568135 | 2          |
| V\$PITX2_Q2 | Pitx2                | PITX2 | 0.0568135 | 2          |
| V\$SPIB_03  | Spi-B                | SPIB  | 0.157515  | 2          |
| V\$IK_Q5    | Ikaros               | IKZF1 | 0.208065  | 2          |
| V\$PUR1_Q4  | PUR1                 | PURA  | 0.0801906 | 2          |
| V\$ELF1_Q6  | Elf-1                | ELF1  | 0.451085  | 2          |
| V\$AHR_Q5   | AhR                  | AHR   | 0.379238  | 2          |
| V\$IRF8_Q6  | IRF-8                | IRF8  | 0.45578   | 2          |
| V\$ETS2_Q6  | c-Ets-2              | ETS2  | 0.0119174 | 2          |
| V\$PARP_Q3  | PARP                 | PARP1 | 0.222478  | 2          |
| V\$MAFB_01  | MAFB                 | MAFB  | 0.110017  | 2          |
| V\$HBP1_Q2  | hbp1                 | HBP1  | 0.367931  | 2          |
| V\$DLX5_01  | dlx5                 | DLX5  | 0.0221504 | 2          |
| V\$FOXO4_02 | FOXO4                | FOXO4 | 0.25615   | 2          |
| V\$GKLF_Q4  | GKLF                 | KLF4  | 0.176069  | 2          |
| V\$PARP_Q4  | PARP                 | PARP1 | 0.222478  | 2          |



|                |            |        |           |   |
|----------------|------------|--------|-----------|---|
| V\$GR_Q6       | GR         | NR3C1  | 0.243596  | 2 |
| V\$ETS2_B      | c-Ets-2    | ETS2   | 0.0119174 | 2 |
| V\$MEF2C_Q4    | MEF-2C     | MEF2C  | 0.072969  | 2 |
| V\$YY1_01      | YY1        | YY1    | 0.471961  | 2 |
| V\$NFAT4_Q3    | NF-AT4     | NFATC3 | 0.393422  | 2 |
| V\$P300_01     | p300       | EP300  | 0.136604  | 2 |
| V\$GABPBETA_Q3 | GABP-beta  | GABPB1 | 0.173044  | 2 |
| V\$GATA3_01    | GATA-3     | GATA3  | 0.402271  | 2 |
| V\$HMG1Y_01    | HMG1Y      | HMGA1  | 0.43742   | 1 |
| V\$TTF1_Q5     | TTF-1      | NKX2-1 | 0.139561  | 1 |
| V\$TCF4_01     | TCF-4      | TCF7L2 | 0.107433  | 1 |
| V\$LEF1_Q5     | LEF-1      | LEF1   | 0.52525   | 1 |
| V\$GFI1_Q6_01  | Gfi1       | GFI1   | 0.369276  | 1 |
| V\$CMYB_Q5     | c-Myb      | MYB    | 0.360717  | 1 |
| V\$AML2_01     | AML2       | RUNX3  | 0.189055  | 1 |
| V\$CDP_04      | CDP        | CUX1   | 0.161203  | 1 |
| V\$GATA2_01    | GATA-2     | GATA2  | 0.134851  | 1 |
| V\$MYB_Q6      | c-Myb      | MYB    | 0.360717  | 1 |
| V\$GATA2_02    | GATA-2     | GATA2  | 0.134851  | 1 |
| V\$GATA2_03    | GATA-2     | GATA2  | 0.134851  | 1 |
| V\$GATA3_02    | GATA-3     | GATA3  | 0.402271  | 1 |
| V\$AMEF2_Q6    | aMEF-2     | MEF2A  | 0.204991  | 1 |
| V\$FAC1_01     | FAC1       | BPTF   | 0.374946  | 1 |
| V\$FOXO4_01    | FOXO4      | FOXO4  | 0.25615   | 1 |
| V\$AFP1_Q6     | AFP1       | ZFH3   | 0.266602  | 1 |
| V\$CEBPD_Q6    | C/EBPdelta | CEBPD  | 0.0585045 | 1 |
| V\$TCF4_Q5     | TCF-4      | TCF7L2 | 0.107433  | 1 |
| V\$GR_01       | GR         | NR3C1  | 0.243596  | 1 |
| V\$FOXM1_01    | FOXM1      | FOXM1  | 0.112792  | 1 |
| V\$STAT1_05    | STAT1      | STAT1  | 0.68435   | 1 |
| V\$CMYB_01     | c-Myb      | MYB    | 0.360717  | 1 |

hsa-mir-16-2

| Matrix_id    | transcription factor | Gene  | PCC       | Occurrence |
|--------------|----------------------|-------|-----------|------------|
| V\$SPIB_03   | Spi-B                | SPIB  | 0.157515  | 2          |
| V\$DLX5_01   | dlx5                 | DLX5  | 0.0221504 | 2          |
| V\$MAFB_01   | MAFB                 | MAFB  | 0.110017  | 2          |
| V\$PARP_Q3   | PARP                 | PARP1 | 0.222478  | 2          |
| V\$ETS2_Q6   | c-Ets-2              | ETS2  | 0.0119174 | 2          |
| V\$IK_Q5     | Ikaros               | IKZF1 | 0.208065  | 2          |
| V\$YY1_Q6_02 | YY1                  | YY1   | 0.471961  | 2          |
| V\$PUR1_Q4   | PUR1                 | PURA  | 0.0801906 | 2          |

|                |            |        |           |   |
|----------------|------------|--------|-----------|---|
| V\$YY1_Q6      | YY1        | YY1    | 0.471961  | 2 |
| V\$IRF8_Q6     | IRF-8      | IRF8   | 0.45578   | 2 |
| V\$GKLF_Q4     | GKLF       | KLF4   | 0.176069  | 2 |
| V\$ATF1_Q6_01  | ATF-1      | ATF1   | 0.424276  | 2 |
| V\$TEL1_Q2     | TEL1       | ETV6   | 0.0501334 | 2 |
| V\$PARP_Q4     | PARP       | PARP1  | 0.222478  | 2 |
| V\$MEF2C_Q4    | MEF-2C     | MEF2C  | 0.072969  | 2 |
| V\$MEF2A_Q6    | mef2A      | MEF2A  | 0.204991  | 2 |
| V\$NFAT4_Q3    | NF-AT4     | NFATC3 | 0.393422  | 2 |
| V\$GABPBETA_Q3 | GABP-beta  | GABPB1 | 0.173044  | 2 |
| V\$BCL6_Q3_01  | Bcl-6      | BCL6   | 0.0301348 | 2 |
| V\$ATF3_Q6_01  | ATF-3      | ATF3   | 0.136991  | 2 |
| V\$ELF1_Q6     | Elf-1      | ELF1   | 0.451085  | 2 |
| V\$GR_Q6       | GR         | NR3C1  | 0.243596  | 2 |
| V\$RSRFC4_Q2   | RSRFC4     | MEF2A  | 0.204991  | 2 |
| V\$P300_Q1     | p300       | EP300  | 0.136604  | 2 |
| V\$ETS2_B      | c-Ets-2    | ETS2   | 0.0119174 | 2 |
| V\$YY1_Q1      | YY1        | YY1    | 0.471961  | 2 |
| V\$HIF1A_Q6    | HIF-1alpha | HIF1A  | 0.189382  | 2 |
| V\$PITX2_Q2    | Pitx2      | PITX2  | 0.0568135 | 2 |
| V\$GATA3_Q1    | GATA-3     | GATA3  | 0.402271  | 2 |
| V\$SP1_Q6      | Sp1        | SP1    | 0.117796  | 2 |
| V\$CEBPG_Q6_01 | C/EBPgamma | CEBPG  | 0.121066  | 1 |
| V\$CDP_Q2      | CDP        | CUX1   | 0.161203  | 1 |
| V\$ATF2_Q5     | ATF-2      | ATF2   | 0.0724699 | 1 |
| V\$MYB_Q6      | c-Myb      | MYB    | 0.360717  | 1 |
| V\$IRF1_Q6_01  | IRF-1      | IRF1   | 0.0789493 | 1 |
| V\$IRF7_Q3     | IRF-7      | IRF7   | 0.219251  | 1 |
| V\$YY1_Q3      | YY1        | YY1    | 0.471961  | 1 |
| V\$TTF1_Q5     | TTF-1      | NKX2-1 | 0.139561  | 1 |
| V\$CEBPB_Q6    | C/EBPbeta  | CEBPB  | 0.0382952 | 1 |
| V\$YY1_Q2      | YY1        | YY1    | 0.471961  | 1 |
| V\$CP2_Q1      | CP2        | TFCP2  | 0.254471  | 1 |
| V\$CEBPB_Q2    | C/EBPbeta  | CEBPB  | 0.0382952 | 1 |
| V\$GFI1_Q6_01  | Gfi1       | GFI1   | 0.369276  | 1 |
| V\$GATA2_Q1    | GATA-2     | GATA2  | 0.134851  | 1 |
| V\$ATF4_Q6     | ATF-4      | ATF4   | 0.0713477 | 1 |
| V\$CMYB_Q5     | c-Myb      | MYB    | 0.360717  | 1 |
| V\$RNF96_Q1    | RNF96      | TRIM28 | 0.222316  | 1 |
| V\$SP1_Q1      | Sp1        | SP1    | 0.117796  | 1 |
| V\$GFI1_Q6     | Gfi1       | GFI1   | 0.369276  | 1 |
| V\$SP1_Q2_Q1   | Sp1        | SP1    | 0.117796  | 1 |
| V\$SP1_Q4_Q1   | Sp1        | SP1    | 0.117796  | 1 |
| V\$ATF6_Q1     | ATF6       | ATF6   | 0.0236223 | 1 |
| V\$CEBPD_Q6    | C/EBPdelta | CEBPD  | 0.0585045 | 1 |
| V\$IRF1_Q6     | IRF-1      | IRF1   | 0.0789493 | 1 |

|              |        |        |            |   |
|--------------|--------|--------|------------|---|
| V\$AMEF2_Q6  | aMEF-2 | MEF2A  | 0.204991   | 1 |
| V\$GATA3_Q2  | GATA-3 | GATA3  | 0.402271   | 1 |
| V\$ZBP89_Q4  | ZBP89  | ZNF148 | 0.0282761  | 1 |
| V\$SP2_Q1    | SP2    | SP2    | 0.171699   | 1 |
| V\$SP1_Q6_Q1 | Sp1    | SP1    | 0.117796   | 1 |
| V\$NFAT2_Q5  | NF-AT2 | NFATC1 | 0.00800998 | 1 |
| V\$HMG1Y_Q1  | HMG1Y  | HMGA1  | 0.43742    | 1 |
| V\$MEF2A_Q5  | MEF2A  | MEF2A  | 0.204991   | 1 |
| V\$STAT1_Q5  | STAT1  | STAT1  | 0.68435    | 1 |
| V\$GATA2_Q2  | GATA-2 | GATA2  | 0.134851   | 1 |
| V\$FOX1M1_Q1 | FOX1M1 | FOX1M1 | 0.112792   | 1 |

hsa-mir-17

| Matrix_id      | transcription factor | Gene   | PCC        | Occurrence |
|----------------|----------------------|--------|------------|------------|
| V\$IK_Q5       | Ikaros               | IKZF1  | 0.211411   | 35         |
| V\$ELF1_Q6     | Elf-1                | ELF1   | 0.588036   | 34         |
| V\$ETS1_B      | c-Ets-1              | ETS1   | 0.065034   | 33         |
| V\$CETS1_Q6    | C-ets-1              | ETS1   | 0.065034   | 32         |
| V\$CMYB_Q5     | c-Myb                | MYB    | 0.724512   | 32         |
| V\$MYB_Q6      | c-Myb                | MYB    | 0.724512   | 32         |
| V\$MAFB_Q1     | MAFB                 | MAFB   | 0.00836639 | 31         |
| V\$DLX5_Q1     | dlx5                 | DLX5   | 0.0927624  | 29         |
| V\$NFAT4_Q3    | NF-AT4               | NFATC3 | 0.603291   | 29         |
| V\$YY1_Q1      | YY1                  | YY1    | 0.138297   | 29         |
| V\$HMG1Y_Q1    | HMG1Y                | HMGA1  | 0.644162   | 24         |
| V\$AHR_Q5      | AhR                  | AHR    | 0.192492   | 22         |
| V\$GFI1_Q6_Q1  | Gfi1                 | GFI1   | 0.640864   | 21         |
| V\$ING4_Q1     | ING4                 | ING4   | 0.222285   | 19         |
| V\$SREBP1_Q6   | SREBP-1              | SREBF1 | 0.0125372  | 17         |
| V\$FOXO4_Q2    | FOXO4                | FOXO4  | 0.117141   | 17         |
| V\$CMYB_Q1     | c-Myb                | MYB    | 0.724512   | 16         |
| V\$AP2ALPHA_Q1 | AP-2alpha            | TFAP2A | 0.129008   | 14         |
| V\$AP2ALPHA_Q6 | AP-2alpha            | TFAP2A | 0.129008   | 12         |
| V\$AP2GAMMA_Q1 | AP-2gamma            | TFAP2C | 0.0514223  | 11         |
| V\$AML2_Q1     | AML2                 | RUNX3  | 0.070263   | 11         |
| V\$FOXO4_Q1    | FOXO4                | FOXO4  | 0.117141   | 10         |
| V\$CP2_Q1      | CP2                  | TFCP2  | 0.119473   | 9          |
| V\$FLI1_Q2     | Fli-1                | FLI1   | 0.00038874 | 5          |
| V\$AP2ALPHA_Q2 | AP-2alphaA           | TFAP2A | 0.129008   | 2          |
| V\$AP2ALPHA_Q3 | AP-2alphaA           | TFAP2A | 0.129008   | 1          |

hsa-mir-181a-1

| Matrix_id      | transcription factor | Gene   | PCC        | Occurrence |
|----------------|----------------------|--------|------------|------------|
| V\$P300_01     | p300                 | EP300  | 0.0327329  | 7          |
| V\$IK_Q5       | Ikaros               | IKZF1  | 0.0146265  | 7          |
| V\$MAFB_01     | MAFB                 | MAFB   | 0.314605   | 7          |
| V\$PUR1_Q4     | PUR1                 | PURA   | 0.21412    | 7          |
| V\$ELF1_Q6     | Elf-1                | ELF1   | 0.245454   | 7          |
| V\$YY1_Q6_03   | YY1                  | YY1    | 0.28848    | 7          |
| V\$PARP_Q4     | PARP                 | PARP1  | 0.332844   | 7          |
| V\$PBX1_Q3     | Pbx1                 | PBX1   | 0.0135267  | 6          |
| V\$ING4_01     | ING4                 | ING4   | 0.640921   | 6          |
| V\$NFAT4_Q3    | NF-AT4               | NFATC3 | 0.156185   | 6          |
| V\$AP4_Q6_02   | AP-4                 | TFAP4  | 0.0278496  | 6          |
| V\$YY1_Q6      | YY1                  | YY1    | 0.28848    | 5          |
| V\$MYB_Q6      | c-Myb                | MYB    | 0.265248   | 5          |
| V\$ETS2_Q6     | c-Ets-2              | ETS2   | 0.059237   | 5          |
| V\$MEF2C_Q4    | MEF-2C               | MEF2C  | 0.437175   | 5          |
| V\$GABPA_Q4    | GABP-alpha           | GABPA  | 0.151764   | 5          |
| V\$CMYB_Q5     | c-Myb                | MYB    | 0.265248   | 5          |
| V\$AP4_Q5      | AP-4                 | TFAP4  | 0.0278496  | 5          |
| V\$GATA2_02    | GATA-2               | GATA2  | 0.119769   | 5          |
| V\$GATA3_02    | GATA-3               | GATA3  | 0.538261   | 5          |
| V\$YY1_01      | YY1                  | YY1    | 0.28848    | 5          |
| V\$DLX5_01     | dlx5                 | DLX5   | 0.315641   | 4          |
| V\$SOX10_Q6    | SOX10                | SOX10  | 0.306898   | 4          |
| V\$YY1_Q6_02   | YY1                  | YY1    | 0.28848    | 4          |
| V\$GATA3_03    | GATA-3               | GATA3  | 0.538261   | 4          |
| V\$IRF8_Q6     | IRF-8                | IRF8   | 0.155707   | 4          |
| V\$TFII_Q6     | TFII-I               | GTF2I  | 0.157267   | 4          |
| V\$GATA3_01    | GATA-3               | GATA3  | 0.538261   | 4          |
| V\$FOXM1_01    | FOXM1                | FOXM1  | 0.0347618  | 4          |
| V\$GR_Q6       | GR                   | NR3C1  | 0.0644551  | 4          |
| V\$ETS2_B      | c-Ets-2              | ETS2   | 0.059237   | 4          |
| V\$GATA2_01    | GATA-2               | GATA2  | 0.119769   | 3          |
| V\$CEBPG_Q6_01 | C/EBPgamma           | CEBPG  | 0.263329   | 3          |
| V\$LEF1_Q5     | LEF-1                | LEF1   | 0.396508   | 3          |
| V\$GATA2_03    | GATA-2               | GATA2  | 0.119769   | 3          |
| V\$CEBPD_Q6    | C/EBPdelta           | CEBPD  | 0.197921   | 3          |
| V\$TCF4_Q5     | TCF-4                | TCF7L2 | 0.0382588  | 3          |
| V\$MEF2A_Q6    | mef2A                | MEF2A  | 0.254403   | 3          |
| V\$SREBP1_Q6   | SREBP-1              | SREBF1 | 0.209193   | 3          |
| V\$GR_01       | GR                   | NR3C1  | 0.0644551  | 3          |
| V\$FOXO3A_Q1   | FOXO3A               | FOXO3  | 0.00116256 | 3          |

|               |         |               |           |   |
|---------------|---------|---------------|-----------|---|
| V\$DEC2_Q2    |         | 2-Dec BHLHE41 | 0.346768  | 2 |
| V\$CP2_Q1     | CP2     | TFCP2         | 0.544619  | 2 |
| V\$FOXO4_Q2   | FOXO4   | FOXO4         | 0.386297  | 2 |
| V\$GFI1_Q6    | Gfi1    | GFI1          | 0.302095  | 2 |
| V\$TCF4_Q1    | TCF-4   | TCF7L2        | 0.0382588 | 2 |
| V\$POU6F1_Q3  | POU6F1  | POU6F1        | 0.103271  | 2 |
| V\$MSX1_Q1    | Msx-1   | MSX1          | 0.0250862 | 2 |
| V\$NMYC_Q1    | N-Myc   | MYCN          | 0.175607  | 1 |
| V\$USF2_Q6    | USF2    | USF2          | 0.0398815 | 1 |
| V\$PBX1_Q4    | Pbx1    | PBX1          | 0.0135267 | 1 |
| V\$GFI1_Q6_Q1 | Gfi1    | GFI1          | 0.302095  | 1 |
| V\$SATB1_Q3   | SATB1   | SATB1         | 0.520394  | 1 |
| V\$POU6F1_Q2  | POU6F1  | POU6F1        | 0.103271  | 1 |
| V\$EGR2_Q1    | Egr-2   | EGR2          | 0.20325   | 1 |
| V\$SREBP1_Q1  | SREBP-1 | SREBF1        | 0.209193  | 1 |
| V\$RORBETA_Q2 | RORBETA | RORB          | 0.0456342 | 1 |

hsa-mir-181a-2

| Matrix_id    | transcription factor | Gene   | PCC       | Occurrence |
|--------------|----------------------|--------|-----------|------------|
| V\$P300_Q1   | p300                 | EP300  | 0.0327329 | 7          |
| V\$ELF1_Q6   | Elf-1                | ELF1   | 0.245454  | 7          |
| V\$PARP_Q4   | PARP                 | PARP1  | 0.332844  | 7          |
| V\$PUR1_Q4   | PUR1                 | PURA   | 0.21412   | 7          |
| V\$MAFB_Q1   | MAFB                 | MAFB   | 0.314605  | 7          |
| V\$ING4_Q1   | ING4                 | ING4   | 0.640921  | 6          |
| V\$NFAT4_Q3  | NF-AT4               | NFATC3 | 0.156185  | 6          |
| V\$PBX1_Q3   | Pbx1                 | PBX1   | 0.0135267 | 6          |
| V\$GABPA_Q4  | GABP-alpha           | GABPA  | 0.151764  | 5          |
| V\$ETS2_Q6   | c-Ets-2              | ETS2   | 0.059237  | 5          |
| V\$GATA3_Q2  | GATA-3               | GATA3  | 0.538261  | 5          |
| V\$AP4_Q5    | AP-4                 | TFAP4  | 0.0278496 | 5          |
| V\$YY1_Q1    | YY1                  | YY1    | 0.28848   | 5          |
| V\$MEF2C_Q4  | MEF-2C               | MEF2C  | 0.437175  | 5          |
| V\$MYB_Q6    | c-Myb                | MYB    | 0.265248  | 5          |
| V\$CMYB_Q5   | c-Myb                | MYB    | 0.265248  | 5          |
| V\$GATA2_Q2  | GATA-2               | GATA2  | 0.119769  | 5          |
| V\$YY1_Q6    | YY1                  | YY1    | 0.28848   | 5          |
| V\$DLX5_Q1   | dlx5                 | DLX5   | 0.315641  | 4          |
| V\$IRF8_Q6   | IRF-8                | IRF8   | 0.155707  | 4          |
| V\$SOX10_Q6  | SOX10                | SOX10  | 0.306898  | 4          |
| V\$YY1_Q6_Q2 | YY1                  | YY1    | 0.28848   | 4          |
| V\$ETS2_B    | c-Ets-2              | ETS2   | 0.059237  | 4          |

|               |            |        |            |   |
|---------------|------------|--------|------------|---|
| V\$CEBPB_02   | C/EBPbeta  | CEBPB  | 0.218778   | 4 |
| V\$CEBPG_Q6   | C/EBPgamma | CEBPG  | 0.263329   | 4 |
| V\$GATA3_01   | GATA-3     | GATA3  | 0.538261   | 4 |
| V\$FOXM1_01   | FOXM1      | FOXM1  | 0.0347618  | 4 |
| V\$PARP_Q3    | PARP       | PARP1  | 0.332844   | 3 |
| V\$TCF4_Q5    | TCF-4      | TCF7L2 | 0.0382588  | 3 |
| V\$FOXO3A_Q1  | FOXO3A     | FOXO3  | 0.00116256 | 3 |
| V\$SREBP1_Q6  | SREBP-1    | SREBF1 | 0.209193   | 3 |
| V\$MEF2A_Q6   | mef2A      | MEF2A  | 0.254403   | 3 |
| V\$LEF1_Q5    | LEF-1      | LEF1   | 0.396508   | 3 |
| V\$GATA2_03   | GATA-2     | GATA2  | 0.119769   | 3 |
| V\$AP4_Q6     | AP-4       | TFAP4  | 0.0278496  | 3 |
| V\$GFI1_Q6    | Gfi1       | GFI1   | 0.302095   | 2 |
| V\$MSX1_01    | Msx-1      | MSX1   | 0.0250862  | 2 |
| V\$HMGY1_Q1   | HMGY1      | HMGY1  | 0.314198   | 2 |
| V\$TCF4_01    | TCF-4      | TCF7L2 | 0.0382588  | 2 |
| V\$FOXO4_01   | FOXO4      | FOXO4  | 0.386297   | 2 |
| V\$FOXO4_02   | FOXO4      | FOXO4  | 0.386297   | 2 |
| V\$POU6F1_03  | POU6F1     | POU6F1 | 0.103271   | 2 |
| V\$PBX1_04    | Pbx1       | PBX1   | 0.0135267  | 1 |
| V\$POU6F1_02  | POU6F1     | POU6F1 | 0.103271   | 1 |
| V\$RORBETA_Q2 | RORBETA    | RORB   | 0.0456342  | 1 |
| V\$RSRFC4_01  | RSRFC4     | MEF2A  | 0.254403   | 1 |
| V\$GFI1_Q6_01 | Gfi1       | GFI1   | 0.302095   | 1 |

hsa-mir-181b-1

| Matrix_id    | transcription factor | Gene   | PCC        | Occurrence |
|--------------|----------------------|--------|------------|------------|
| V\$PUR1_Q4   | PUR1                 | PURA   | 0.233432   | 221        |
| V\$IK_Q5     | Ikaros               | IKZF1  | 0.00236632 | 219        |
| V\$ELF1_Q6   | Elf-1                | ELF1   | 0.0455922  | 207        |
| V\$MAFB_01   | MAFB                 | MAFB   | 0.154448   | 206        |
| V\$PARP_Q4   | PARP                 | PARP1  | 0.36657    | 206        |
| V\$ZIC3_01   | Zic3                 | ZIC3   | 0.0355729  | 201        |
| V\$NFAT4_Q3  | NF-AT4               | NFATC3 | 0.0322154  | 183        |
| V\$MYB_Q6    | c-Myb                | MYB    | 0.246159   | 180        |
| V\$ETS2_Q6   | c-Ets-2              | ETS2   | 0.0731369  | 180        |
| V\$CMYB_Q5   | c-Myb                | MYB    | 0.246159   | 180        |
| V\$SOX9_Q4   | SOX9                 | SOX9   | 0.0664039  | 179        |
| V\$GABPA_Q4  | GABP-alpha           | GABPA  | 0.00638435 | 175        |
| V\$YY1_01    | YY1                  | YY1    | 0.0981945  | 164        |
| V\$AP4_Q6_02 | AP-4                 | TFAP4  | 0.169186   | 164        |
| V\$MEF2C_Q4  | MEF-2C               | MEF2C  | 0.670208   | 157        |

|                |            |               |            |     |
|----------------|------------|---------------|------------|-----|
| V\$SOX9_B1     | SOX9       | SOX9          | 0.0664039  | 150 |
| V\$YY1_Q6_02   | YY1        | YY1           | 0.0981945  | 146 |
| V\$YY1_Q6      | YY1        | YY1           | 0.0981945  | 146 |
| V\$ETS2_B      | c-Ets-2    | ETS2          | 0.0731369  | 145 |
| V\$TFII_Q6     | TFII-I     | GTF2I         | 0.151038   | 137 |
| V\$ING4_01     | ING4       | ING4          | 0.734366   | 130 |
| V\$GATA3_01    | GATA-3     | GATA3         | 0.0413532  | 124 |
| V\$PBX1_04     | Pbx1       | PBX1          | 0.084533   | 124 |
| V\$GATA3_02    | GATA-3     | GATA3         | 0.0413532  | 122 |
| V\$AP4_Q5      | AP-4       | TFAP4         | 0.169186   | 121 |
| V\$LEF1_Q5     | LEF-1      | LEF1          | 0.337477   | 114 |
| V\$PBX1_Q3     | Pbx1       | PBX1          | 0.084533   | 111 |
| V\$GFI1_Q6     | Gfi1       | GFI1          | 0.210698   | 109 |
| V\$YY1_Q6_03   | YY1        | YY1           | 0.0981945  | 107 |
| V\$GFI1_Q6_01  | Gfi1       | GFI1          | 0.210698   | 105 |
| V\$SREBP1_Q6   | SREBP-1    | SREBF1        | 0.0332049  | 104 |
| V\$FOXM1_01    | FOXM1      | FOXM1         | 0.0409194  | 96  |
| V\$IRF8_Q6     | IRF-8      | IRF8          | 0.210383   | 95  |
| V\$SOX10_Q6    | SOX10      | SOX10         | 0.55624    | 92  |
| V\$GATA3_03    | GATA-3     | GATA3         | 0.0413532  | 85  |
| V\$CP2_01      | CP2        | TFCP2         | 0.25997    | 84  |
| V\$CEBPG_Q6_01 | C/EBPgamma | CEBPG         | 0.062904   | 78  |
| V\$MEF2A_Q6    | mef2A      | MEF2A         | 0.516423   | 71  |
| V\$DBP_Q6_01   | DBP        | DBP           | 0.125443   | 64  |
| V\$NURR1_Q3    | NURR1      | NR4A2         | 0.00263606 | 62  |
| V\$MSX1_01     | Msx-1      | MSX1          | 0.0559476  | 51  |
| V\$HOXB8_01    | HOXB8      | HOXB8         | 0.164495   | 47  |
| V\$DEC2_Q2     |            | 2-Dec BHLHE41 | 0.555073   | 41  |
| V\$EGR2_01     | Egr-2      | EGR2          | 0.210019   | 38  |
| V\$USF2_Q6     | USF2       | USF2          | 0.202392   | 32  |
| V\$RORBETA_Q2  | RORBETA    | RORB          | 0.161762   | 30  |
| V\$POU6F1_03   | POU6F1     | POU6F1        | 0.253449   | 28  |
| V\$SATB1_Q3    | SATB1      | SATB1         | 0.56059    | 23  |
| V\$POU6F1_02   | POU6F1     | POU6F1        | 0.253449   | 21  |
| V\$SREBP1_01   | SREBP-1    | SREBF1        | 0.0332049  | 12  |

hsa-mir-181b-2

| Matrix_id  | transcription factor | Gene  | PCC       | Occurrence |
|------------|----------------------|-------|-----------|------------|
| V\$PUR1_Q4 | PUR1                 | PURA  | 0.233432  | 221        |
| V\$ELF1_Q6 | Elf-1                | ELF1  | 0.0455922 | 207        |
| V\$MAFB_01 | MAFB                 | MAFB  | 0.154448  | 206        |
| V\$PARP_Q4 | PARP                 | PARP1 | 0.36657   | 206        |

|               |            |        |            |     |
|---------------|------------|--------|------------|-----|
| V\$ZIC3_01    | Zic3       | ZIC3   | 0.0355729  | 201 |
| V\$NFAT4_Q3   | NF-AT4     | NFATC3 | 0.0322154  | 183 |
| V\$MYB_Q6     | c-Myb      | MYB    | 0.246159   | 180 |
| V\$CMYB_Q5    | c-Myb      | MYB    | 0.246159   | 180 |
| V\$ETS2_Q6    | c-Ets-2    | ETS2   | 0.0731369  | 180 |
| V\$SOX9_Q4    | SOX9       | SOX9   | 0.0664039  | 179 |
| V\$GABPA_Q4   | GABP-alpha | GABPA  | 0.00638435 | 175 |
| V\$YY1_01     | YY1        | YY1    | 0.0981945  | 164 |
| V\$MEF2C_Q4   | MEF-2C     | MEF2C  | 0.670208   | 157 |
| V\$SOX9_B1    | SOX9       | SOX9   | 0.0664039  | 150 |
| V\$YY1_Q6     | YY1        | YY1    | 0.0981945  | 146 |
| V\$YY1_Q6_02  | YY1        | YY1    | 0.0981945  | 146 |
| V\$ETS2_B     | c-Ets-2    | ETS2   | 0.0731369  | 145 |
| V\$PARP_Q3    | PARP       | PARP1  | 0.36657    | 137 |
| V\$ING4_01    | ING4       | ING4   | 0.734366   | 130 |
| V\$GATA3_01   | GATA-3     | GATA3  | 0.0413532  | 124 |
| V\$PBX1_04    | Pbx1       | PBX1   | 0.084533   | 124 |
| V\$GATA3_02   | GATA-3     | GATA3  | 0.0413532  | 122 |
| V\$HMG1Y_01   | HMG1Y      | HMG1A  | 0.127908   | 121 |
| V\$AP4_Q5     | AP-4       | TFAP4  | 0.169186   | 121 |
| V\$LEF1_Q5    | LEF-1      | LEF1   | 0.337477   | 114 |
| V\$AP4_Q6     | AP-4       | TFAP4  | 0.169186   | 113 |
| V\$PBX1_Q3    | Pbx1       | PBX1   | 0.084533   | 111 |
| V\$GFI1_Q6    | Gfi1       | GFI1   | 0.210698   | 109 |
| V\$GFI1_Q6_01 | Gfi1       | GFI1   | 0.210698   | 105 |
| V\$SREBP1_Q6  | SREBP-1    | SREBF1 | 0.0332049  | 104 |
| V\$FOX1_01    | FOX1       | FOX1   | 0.0409194  | 96  |
| V\$IRF8_Q6    | IRF-8      | IRF8   | 0.210383   | 95  |
| V\$SOX10_Q6   | SOX10      | SOX10  | 0.55624    | 92  |
| V\$FAC1_01    | FAC1       | BPTF   | 0.0545814  | 79  |
| V\$MEF2A_Q6   | mef2A      | MEF2A  | 0.516423   | 71  |
| V\$NURR1_Q3   | NURR1      | NR4A2  | 0.00263606 | 62  |
| V\$MSX1_01    | Msx-1      | MSX1   | 0.0559476  | 51  |
| V\$CEBPG_Q6   | C/EBPgamma | CEBPG  | 0.062904   | 34  |
| V\$RORBETA_Q2 | RORBETA    | RORB   | 0.161762   | 30  |
| V\$POU6F1_03  | POU6F1     | POU6F1 | 0.253449   | 28  |
| V\$RSRFC4_01  | RSRFC4     | MEF2A  | 0.516423   | 22  |
| V\$POU6F1_02  | POU6F1     | POU6F1 | 0.253449   | 21  |

hsa-mir-181c

| Matrix_id  | transcription factor | Gene | PCC      | Occurrence |
|------------|----------------------|------|----------|------------|
| V\$CMYB_01 | c-Myb                | MYB  | 0.351094 | 3          |



|                |         |        |           |   |
|----------------|---------|--------|-----------|---|
| V\$PARP_Q4     | PARP    | PARP1  | 0.222841  | 3 |
| V\$MEF2C_Q4    | MEF-2C  | MEF2C  | 0.415377  | 3 |
| V\$GKLF_Q4     | GKLF    | KLF4   | 0.0492646 | 3 |
| V\$PUR1_Q4     | PUR1    | PURA   | 0.0754386 | 3 |
| V\$HMGYIY_Q01  | HMGYIY  | HMGA1  | 0.21392   | 3 |
| V\$MAFB_Q01    | MAFB    | MAFB   | 0.31996   | 3 |
| V\$PARP_Q3     | PARP    | PARP1  | 0.222841  | 3 |
| V\$YY1_Q01     | YY1     | YY1    | 0.102029  | 3 |
| V\$AP4_Q6_Q02  | AP-4    | TFAP4  | 0.0055136 | 2 |
| V\$AHR_Q5      | AhR     | AHR    | 0.0348461 | 2 |
| V\$SREBP1_Q6   | SREBP-1 | SREBF1 | 0.0652646 | 2 |
| V\$GFI1_Q6_Q01 | Gfi1    | GFI1   | 0.292265  | 2 |
| V\$NFAT4_Q3    | NF-AT4  | NFATC3 | 0.123307  | 2 |
| V\$ZIC1_Q01    | Zic1    | ZIC1   | 0.555995  | 1 |
| V\$LEF1_Q5     | LEF-1   | LEF1   | 0.437343  | 1 |
| V\$RNF96_Q01   | RNF96   | TRIM28 | 0.0743387 | 1 |
| V\$TFIIL_Q6    | TFII-I  | GTF2I  | 0.162326  | 1 |
| V\$SP2_Q01     | SP2     | SP2    | 0.158864  | 1 |
| V\$SOX10_Q6    | SOX10   | SOX10  | 0.324727  | 1 |
| V\$ERM_Q02     | Erm     | ETV5   | 0.123745  | 1 |

hsa-mir-181d

| Matrix_id      | transcription factor | Gene   | PCC       | Occurrence |
|----------------|----------------------|--------|-----------|------------|
| V\$PUR1_Q4     | PUR1                 | PURA   | 0.167814  | 62         |
| V\$IK_Q5       | Ikaros               | IKZF1  | 0.0203872 | 60         |
| V\$PARP_Q4     | PARP                 | PARP1  | 0.333632  | 58         |
| V\$MAFB_Q01    | MAFB                 | MAFB   | 0.0994936 | 56         |
| V\$NFAT4_Q3    | NF-AT4               | NFATC3 | 0.0738611 | 52         |
| V\$YY1_Q01     | YY1                  | YY1    | 0.0635341 | 50         |
| V\$AP4_Q6_Q02  | AP-4                 | TFAP4  | 0.0547401 | 47         |
| V\$MEF2C_Q4    | MEF-2C               | MEF2C  | 0.603196  | 46         |
| V\$MAZ_Q6      | MAZ                  | MAZ    | 0.040487  | 44         |
| V\$PARP_Q3     | PARP                 | PARP1  | 0.333632  | 40         |
| V\$HMGYIY_Q01  | HMGYIY               | HMGA1  | 0.1661    | 35         |
| V\$CMYB_Q01    | c-Myb                | MYB    | 0.277851  | 33         |
| V\$TFIIL_Q6    | TFII-I               | GTF2I  | 0.059118  | 32         |
| V\$SREBP1_Q6   | SREBP-1              | SREBF1 | 0.0261687 | 31         |
| V\$MAZ_Q6_Q01  | MAZ                  | MAZ    | 0.040487  | 29         |
| V\$LEF1_Q5     | LEF-1                | LEF1   | 0.415919  | 29         |
| V\$GFI1_Q6_Q01 | Gfi1                 | GFI1   | 0.257041  | 26         |
| V\$ERF_Q02     | ERF                  | ERF    | 0.0149954 | 26         |
| V\$SOX10_Q6    | SOX10                | SOX10  | 0.469941  | 20         |

|            |      |      |           |    |
|------------|------|------|-----------|----|
| V\$ZIC1_01 | Zic1 | ZIC1 | 0.733255  | 20 |
| V\$ERM_02  | Erm  | ETV5 | 0.0709157 | 13 |

hsa-mir-183

| Matrix_id     | transcription factor | Gene   | PCC       | Occurrence |
|---------------|----------------------|--------|-----------|------------|
| V\$MYB_Q6     | c-Myb                | MYB    | 0.772173  | 19         |
| V\$ELF1_Q6    | Elf-1                | ELF1   | 0.413991  | 19         |
| V\$IK_Q5      | Ikaros               | IKZF1  | 0.269933  | 19         |
| V\$CMYB_Q5    | c-Myb                | MYB    | 0.772173  | 19         |
| V\$GATA3_01   | GATA-3               | GATA3  | 0.142337  | 13         |
| V\$GATA3_02   | GATA-3               | GATA3  | 0.142337  | 13         |
| V\$GFI1_Q6_01 | Gfi1                 | GFI1   | 0.630326  | 9          |
| V\$LEF1_Q5    | LEF-1                | LEF1   | 0.861342  | 9          |
| V\$ZABC1_01   | ZABC1                | ZNF217 | 0.0512304 | 8          |

hsa-mir-184

| Matrix_id      | transcription factor | Gene  | PCC        | Occurrence |
|----------------|----------------------|-------|------------|------------|
| V\$PUR1_Q4     | PUR1                 | PURA  | 0.236662   | 176        |
| V\$PEA3_Q6     | PEA3                 | ETV4  | 0.0495682  | 173        |
| V\$PARP_Q4     | PARP                 | PARP1 | 0.307426   | 171        |
| V\$ELF1_Q6     | Elf-1                | ELF1  | 0.0848758  | 167        |
| V\$GKLF_Q4     | GKLF                 | KLF4  | 0.481682   | 166        |
| V\$MAFB_01     | MAFB                 | MAFB  | 0.258459   | 164        |
| V\$ETS1_B      | c-Ets-1              | ETS1  | 0.118015   | 160        |
| V\$ZIC3_01     | Zic3                 | ZIC3  | 0.195632   | 157        |
| V\$SMAD4_Q6_01 | Smad4                | SMAD4 | 0.259353   | 157        |
| V\$P300_01     | p300                 | EP300 | 0.350625   | 152        |
| V\$CETS1_Q6    | C-ets-1              | ETS1  | 0.118015   | 151        |
| V\$GATA1_01    | GATA-1               | GATA1 | 0.0175807  | 149        |
| V\$SOX9_Q4     | SOX9                 | SOX9  | 0.100345   | 149        |
| V\$GABPA_Q4    | GABP-alpha           | GABPA | 0.412232   | 145        |
| V\$TBX5_02     | TBX5                 | TBX5  | 0.0333064  | 140        |
| V\$GR_Q6       | GR                   | NR3C1 | 0.116517   | 134        |
| V\$TBP_Q6      | TBP                  | TBP   | 0.411472   | 134        |
| V\$AML1_Q6     | AML1                 | RUNX1 | 0.00455339 | 131        |
| V\$AP4_Q6_02   | AP-4                 | TFAP4 | 0.0603452  | 125        |
| V\$MEF2C_Q4    | MEF-2C               | MEF2C | 0.182618   | 125        |
| V\$YY1_Q6_02   | YY1                  | YY1   | 0.420658   | 124        |

|                   |            |        |            |     |
|-------------------|------------|--------|------------|-----|
| V\$YY1_Q6         | YY1        | YY1    | 0.420658   | 122 |
| V\$GATA1_02       | GATA-1     | GATA1  | 0.0175807  | 120 |
| V\$TBX5_01        | TBX5       | TBX5   | 0.0333064  | 115 |
| V\$GATA2_02       | GATA-2     | GATA2  | 0.572916   | 113 |
| V\$GATA1_05       | GATA-1     | GATA1  | 0.0175807  | 113 |
| V\$GATA1_06       | GATA-1     | GATA1  | 0.0175807  | 113 |
| V\$AHR_Q5         | AhR        | AHR    | 0.813665   | 112 |
| V\$PARP_Q3        | PARP       | PARP1  | 0.307426   | 110 |
| V\$ERBETA_Q5      | ER-beta    | ESR2   | 0.0870371  | 107 |
| V\$E2A_Q6         | E2A        | TCF3   | 0.0530606  | 106 |
| V\$E12_Q6         | E12        | TCF3   | 0.0530606  | 106 |
| V\$E47_Q2         | E47        | TCF3   | 0.0530606  | 104 |
| V\$MYOGENIN_Q6    | myogenin   | MYOG   | 0.00963463 | 100 |
| V\$GATA3_01       | GATA-3     | GATA3  | 0.797233   | 99  |
| V\$GATA1_04       | GATA-1     | GATA1  | 0.0175807  | 99  |
| V\$WT1_Q6         | WT1        | WT1    | 0.0130678  | 97  |
| V\$GATA3_02       | GATA-3     | GATA3  | 0.797233   | 97  |
| V\$E2A_Q2         | E2A        | TCF3   | 0.0530606  | 92  |
| V\$SREBP1_Q6      | SREBP-1    | SREBF1 | 0.180968   | 90  |
| V\$GATA2_01       | GATA-2     | GATA2  | 0.572916   | 89  |
| V\$AP4_Q5         | AP-4       | TFAP4  | 0.0603452  | 89  |
| V\$CMF1_Q1        | c-Maf      | MAF    | 0.122691   | 86  |
| V\$AML1_Q1        | AML1a      | RUNX1  | 0.00455339 | 84  |
| V\$GR_Q1          | GR         | NR3C1  | 0.116517   | 83  |
| V\$TCF4_Q1        | TCF-4      | TCF7L2 | 0.399469   | 83  |
| V\$CEBPA_Q6       | C/EBPalpha | CEBPA  | 0.0113686  | 82  |
| V\$AP4_Q6         | AP-4       | TFAP4  | 0.0603452  | 80  |
| V\$TCF4_Q5        | TCF-4      | TCF7L2 | 0.399469   | 79  |
| V\$MYOGENIN_Q6_Q1 | myogenin   | MYOG   | 0.00963463 | 76  |
| V\$AML1_Q4        | AML1       | RUNX1  | 0.00455339 | 75  |
| V\$FOXM1_Q1       | FOXO1      | FOXO1  | 0.112631   | 75  |
| V\$NKX2B_Q3       | NKX2B      | NKX2-2 | 0.10446    | 71  |
| V\$NKX2B_Q2       | NKX2B      | NKX2-2 | 0.10446    | 65  |
| V\$HBP1_Q2        | hbp1       | HBP1   | 0.499467   | 64  |
| V\$FAC1_Q1        | FAC1       | BPTF   | 0.0632506  | 61  |
| V\$CEBPB_Q2       | C/EBPbeta  | CEBPB  | 0.40595    | 58  |
| V\$E47_Q1         | E47        | TCF3   | 0.0530606  | 54  |
| V\$AP4_Q6_Q1      | AP-4       | TFAP4  | 0.0603452  | 50  |
| V\$GATA2_Q3       | GATA-2     | GATA2  | 0.572916   | 50  |
| V\$STAT3_Q3       | STAT3      | STAT3  | 0.0733801  | 49  |
| V\$MEF2A_Q6       | mef2A      | MEF2A  | 0.0784219  | 43  |
| V\$CI2_Q1         | CI2        | ZNF384 | 0.15858    | 40  |
| V\$RORBETA_Q2     | RORBETA    | RORB   | 0.0414371  | 33  |
| V\$POU6F1_Q3      | POU6F1     | POU6F1 | 0.0344948  | 31  |
| V\$E2F1_Q4        | E2F-1      | E2F1   | 0.0154376  | 28  |
| V\$FOXJ2_Q2       | FOXJ2      | FOXJ2  | 0.106655   | 28  |

|               |        |        |           |    |
|---------------|--------|--------|-----------|----|
| V\$CDP_04     | CDP    | CUX1   | 0.31857   | 25 |
| V\$MAFK_Q3    | MafK   | MAFK   | 0.163016  | 21 |
| V\$TCF4_Q5_01 | TCF-4  | TCF7L2 | 0.399469  | 12 |
| V\$STAT4_Q4   | STAT4  | STAT4  | 0.0124705 | 9  |
| V\$POU6F1_01  | POU6F1 | POU6F1 | 0.0344948 | 8  |
| V\$E4BP4_01   | E4BP4  | NFIL3  | 0.125057  | 7  |
| V\$CDP_02     | CDP    | CUX1   | 0.31857   | 3  |

hsa-mir-188

| Matrix_id      | transcription factor | Gene   | PCC       | Occurrence |
|----------------|----------------------|--------|-----------|------------|
| V\$IK_Q5       | Ikaros               | IKZF1  | 0.233897  | 15         |
| V\$YY1_01      | YY1                  | YY1    | 0.308546  | 15         |
| V\$PUR1_Q4     | PUR1                 | PURA   | 0.130449  | 15         |
| V\$AP2REP_01   | AP-2rep              | KLF12  | 0.273275  | 15         |
| V\$ZIC3_01     | Zic3                 | ZIC3   | 0.523745  | 14         |
| V\$SMAD3_Q6_01 | Smad3                | SMAD3  | 0.271471  | 14         |
| V\$SMAD4_Q6_01 | Smad4                | SMAD4  | 0.433909  | 14         |
| V\$YY1_Q6      | YY1                  | YY1    | 0.308546  | 14         |
| V\$AML1_Q6     | AML1                 | RUNX1  | 0.287998  | 14         |
| V\$ELF1_Q6     | Elf-1                | ELF1   | 0.016575  | 14         |
| V\$GATA1_01    | GATA-1               | GATA1  | 0.0446157 | 14         |
| V\$P300_01     | p300                 | EP300  | 0.484412  | 14         |
| V\$PARP_Q4     | PARP                 | PARP1  | 0.242996  | 14         |
| V\$DLX5_01     | dlx5                 | DLX5   | 0.564617  | 13         |
| V\$SOX5_01     | SOX5                 | SOX5   | 0.44024   | 13         |
| V\$NR1B2_Q6    | NR1B2                | RARB   | 0.398326  | 13         |
| V\$IPF1_01     | IPF1                 | PDX1   | 0.339611  | 13         |
| V\$GKLF_Q4     | GKLF                 | KLF4   | 0.233783  | 13         |
| V\$TBX5_02     | TBX5                 | TBX5   | 0.249654  | 12         |
| V\$TBP_Q6      | TBP                  | TBP    | 0.394132  | 12         |
| V\$YY1_Q6_02   | YY1                  | YY1    | 0.308546  | 12         |
| V\$CDX2_Q5_02  | CDX-2                | CDX2   | 0.307564  | 12         |
| V\$NFAT4_Q3    | NF-AT4               | NFATC3 | 0.195203  | 12         |
| V\$CRX_Q4      | Crx                  | CRX    | 0.402791  | 12         |
| V\$IRF8_Q6     | IRF-8                | IRF8   | 0.0226705 | 11         |
| V\$HNF4A_Q6_01 | HNF-4alpha           | HNF4A  | 0.425346  | 11         |
| V\$YY1_Q6_03   | YY1                  | YY1    | 0.308546  | 11         |
| V\$ZBP89_Q4    | ZBP89                | ZNF148 | 0.0739106 | 11         |
| V\$TBX5_01     | TBX5                 | TBX5   | 0.249654  | 11         |
| V\$PITX3_Q2    | PITX3                | PITX3  | 0.201958  | 11         |
| V\$NANOG_02    | Nanog                | NANOG  | 0.295458  | 11         |
| V\$NFAT2_Q5    | NF-AT2               | NFATC1 | 0.250235  | 11         |

|                |           |          |           |    |
|----------------|-----------|----------|-----------|----|
| V\$SRY_02      | SRY       | SRY      | 0.148689  | 11 |
| V\$GR_Q6       | GR        | NR3C1    | 0.325925  | 11 |
| V\$GATA1_02    | GATA-1    | GATA1    | 0.0446157 | 11 |
| V\$PITX2_Q2    | Pitx2     | PITX2    | 0.388841  | 11 |
| V\$GATA2_02    | GATA-2    | GATA2    | 0.464684  | 11 |
| V\$GATA1_05    | GATA-1    | GATA1    | 0.0446157 | 11 |
| V\$GATA1_06    | GATA-1    | GATA1    | 0.0446157 | 11 |
| V\$AP4_Q6_02   | AP-4      | TFAP4    | 0.21889   | 10 |
| V\$IPF1_Q4_01  | IPF1      | PDX1     | 0.339611  | 10 |
| V\$HNF3A_01    | HNF3A     | FOXA1    | 0.0653516 | 10 |
| V\$GATA1_04    | GATA-1    | GATA1    | 0.0446157 | 10 |
| V\$AHR_Q5      | AhR       | AHR      | 0.255312  | 10 |
| V\$CDX2_01     | Cdx-2     | CDX2     | 0.307564  | 10 |
| V\$BEN_01      | BEN       | GTF2IRD1 | 0.277114  | 10 |
| V\$GATA3_02    | GATA-3    | GATA3    | 0.477043  | 10 |
| V\$IPF1_Q6     | IPF1      | PDX1     | 0.339611  | 10 |
| V\$SP1_Q6      | Sp1       | SP1      | 0.366697  | 9  |
| V\$PBX1_04     | Pbx1      | PBX1     | 0.0885437 | 9  |
| V\$CDX2_Q5_01  | Cdx-2     | CDX2     | 0.307564  | 9  |
| V\$RFX1_02     | RFX1      | RFX1     | 0.305393  | 9  |
| V\$PITX2_01    | PITX2     | PITX2    | 0.388841  | 9  |
| V\$SP1_Q4_01   | Sp1       | SP1      | 0.366697  | 9  |
| V\$SP1_02      | SP1       | SP1      | 0.366697  | 9  |
| V\$WT1_Q6_01   | WT1       | WT1      | 0.164918  | 9  |
| V\$SP1_Q6_01   | Sp1       | SP1      | 0.366697  | 9  |
| V\$NKX32_01    | Nkx3-2    | NKX3-2   | 0.282579  | 9  |
| V\$SMAD3_Q6    | SMAD3     | SMAD3    | 0.271471  | 9  |
| V\$SREBP1_Q6   | SREBP-1   | SREBF1   | 0.178179  | 8  |
| V\$CRX_Q2      | Crx       | CRX      | 0.402791  | 8  |
| V\$CP2_01      | CP2       | TFCP2    | 0.474268  | 8  |
| V\$TEF1_Q6     | TEF-1     | TEAD1    | 0.342565  | 8  |
| V\$YY1_Q2      | YY1       | YY1      | 0.308546  | 8  |
| V\$PITX1_01    | Pitx1     | PITX1    | 0.23945   | 8  |
| V\$SP1_Q2_01   | Sp1       | SP1      | 0.366697  | 8  |
| V\$AP2ALPHA_01 | AP-2alpha | TFAP2A   | 0.442639  | 8  |
| V\$PARP_Q3     | PARP      | PARP1    | 0.242996  | 8  |
| V\$IPF1_Q4     | IPF1      | PDX1     | 0.339611  | 7  |
| V\$FOXO4_Q2    | FOXO4     | FOXO4    | 0.440952  | 7  |
| V\$ZABC1_01    | ZABC1     | ZNF217   | 0.375635  | 7  |
| V\$HMGY1_Q1    | HMGY1     | HMGY1    | 0.224424  | 7  |
| V\$FOXJ2_Q1    | FOXJ2     | FOXJ2    | 0.420893  | 7  |
| V\$TCF4_Q1     | TCF-4     | TCF7L2   | 0.233212  | 7  |
| V\$GATA2_Q1    | GATA-2    | GATA2    | 0.464684  | 6  |
| V\$GATA3_Q1    | GATA-3    | GATA3    | 0.477043  | 6  |
| V\$CRX_Q4_Q1   | CRX       | CRX      | 0.402791  | 6  |
| V\$CEBPB_Q2    | C/EBPbeta | CEBPB    | 0.105614  | 6  |

|                |            |        |           |   |
|----------------|------------|--------|-----------|---|
| V\$CDX1_01     | Cdx-1      | CDX1   | 0.130514  | 6 |
| V\$GATA3_03    | GATA-3     | GATA3  | 0.477043  | 6 |
| V\$GATA2_03    | GATA-2     | GATA2  | 0.464684  | 5 |
| V\$HIF1A_Q6    | HIF-1alpha | HIF1A  | 0.217263  | 5 |
| V\$AP2GAMMA_01 | AP-2gamma  | TFAP2C | 0.40565   | 5 |
| V\$HOXA9_01    | hoxa9      | HOXA9  | 0.549002  | 5 |
| V\$TEF1_Q6_03  | TEF-1      | TEAD1  | 0.342565  | 5 |
| V\$NKX32_02    | Nkx3-2     | NKX3-2 | 0.282579  | 5 |
| V\$IPF1_02     | IPF1       | PDX1   | 0.339611  | 5 |
| V\$ARNT_01     | Arnt       | ARNT   | 0.487393  | 5 |
| V\$TCF4_Q5     | TCF-4      | TCF7L2 | 0.233212  | 5 |
| V\$HOX13_02    | HOXA5      | HOXA5  | 0.206732  | 4 |
| V\$SP2_01      | SP2        | SP2    | 0.268538  | 4 |
| V\$HOXD9_Q2    | Hoxd9      | HOXD9  | 0.375816  | 4 |
| V\$NCX_02      | Ncx        | TLX2   | 0.0836869 | 4 |
| V\$E2F1_Q3_01  | E2F-1      | E2F1   | 0.360432  | 3 |
| V\$BACH2_01    | Bach2      | BACH2  | 0.18911   | 3 |
| V\$LHX3b_01    | LHX3b      | LHX3   | 0.318726  | 3 |
| V\$BCL6_Q3_01  | Bcl-6      | BCL6   | 0.176724  | 3 |
| V\$IPF1_03     | IPF1       | PDX1   | 0.339611  | 3 |
| V\$IPF1_06     | ipf1       | PDX1   | 0.339611  | 3 |
| V\$STAT4_Q5    | STAT4      | STAT4  | 0.327038  | 3 |
| V\$CART1_02    | CART1      | ALX1   | 0.416399  | 3 |
| V\$CEBPG_Q6_01 | C/EBPgamma | CEBPG  | 0.06065   | 3 |
| V\$POU6F1_02   | POU6F1     | POU6F1 | 0.333475  | 2 |
| V\$POU6F1_03   | POU6F1     | POU6F1 | 0.333475  | 2 |
| V\$YY1_03      | YY1        | YY1    | 0.308546  | 2 |
| V\$NRF1_Q6     | NRF-1      | NRF1   | 0.27369   | 1 |
| V\$CDP_04      | CDP        | CUX1   | 0.253099  | 1 |

hsa-mir-18a

| Matrix_id     | transcription factor | Gene  | PCC       | Occurrence |
|---------------|----------------------|-------|-----------|------------|
| V\$ELK1_06    | ELK-1                | ELK1  | 0.026234  | 2          |
| V\$DLX5_01    | dlx5                 | DLX5  | 0.32268   | 2          |
| V\$MAFB_01    | MAFB                 | MAFB  | 0.0155749 | 2          |
| V\$PARP_Q3    | PARP                 | PARP1 | 0.231703  | 2          |
| V\$IK_Q5      | Ikaros               | IKZF1 | 0.015615  | 2          |
| V\$SOX9_Q4    | SOX9                 | SOX9  | 0.280814  | 2          |
| V\$TBP_Q6     | TBP                  | TBP   | 0.478791  | 2          |
| V\$E2F1_Q6_01 | E2F-1                | E2F1  | 0.0578629 | 2          |
| V\$AHR_Q5     | AhR                  | AHR   | 0.143207  | 2          |
| V\$AML1_Q4    | AML1                 | RUNX1 | 0.035692  | 2          |

|                |            |        |           |   |
|----------------|------------|--------|-----------|---|
| V\$ING4_01     | ING4       | ING4   | 0.323642  | 2 |
| V\$PARP_Q4     | PARP       | PARP1  | 0.231703  | 2 |
| V\$HNF3B_Q6    | HNF-3beta  | FOXA2  | 0.0536362 | 2 |
| V\$GFI1_Q6_01  | Gfi1       | GFI1   | 0.105969  | 2 |
| V\$NFAT4_Q3    | NF-AT4     | NFATC3 | 0.218265  | 2 |
| V\$AP2ALPHA_Q6 | AP-2alpha  | TFAP2A | 0.166616  | 2 |
| V\$GKLF_Q4     | GKLF       | KLF4   | 0.185677  | 2 |
| V\$CMYB_Q5     | c-Myb      | MYB    | 0.13213   | 2 |
| V\$SP2_01      | SP2        | SP2    | 0.0537527 | 2 |
| V\$AML1_Q6     | AML1       | RUNX1  | 0.035692  | 2 |
| V\$SREBP1_Q6   | SREBP-1    | SREBF1 | 0.170175  | 2 |
| V\$ELF1_Q6     | Elf-1      | ELF1   | 0.125885  | 2 |
| V\$E2F1_Q3     | E2F-1      | E2F1   | 0.0578629 | 2 |
| V\$ETS1_B      | c-Ets-1    | ETS1   | 0.0188762 | 2 |
| V\$AML1_01     | AML1a      | RUNX1  | 0.035692  | 2 |
| V\$MYB_Q6      | c-Myb      | MYB    | 0.13213   | 2 |
| V\$CP2_01      | CP2        | TFCP2  | 0.242186  | 2 |
| V\$YY1_01      | YY1        | YY1    | 0.0675607 | 2 |
| V\$ELK1_02     | Elk-1      | ELK1   | 0.026234  | 2 |
| V\$E2F1_Q6     | E2F-1      | E2F1   | 0.0578629 | 2 |
| V\$ZIC3_01     | Zic3       | ZIC3   | 0.101243  | 2 |
| V\$AP2ALPHA_01 | AP-2alpha  | TFAP2A | 0.166616  | 2 |
| V\$AP2GAMMA_01 | AP-2gamma  | TFAP2C | 0.0646002 | 2 |
| V\$MAZ_Q6      | MAZ        | MAZ    | 0.171785  | 2 |
| V\$CETS1_Q6    | C-ets-1    | ETS1   | 0.0188762 | 1 |
| V\$FOXO4_02    | FOXO4      | FOXO4  | 0.258419  | 1 |
| V\$STAT5A_Q6   | STAT5A     | STAT5A | 0.0618496 | 1 |
| V\$SOX5_01     | SOX5       | SOX5   | 0.202431  | 1 |
| V\$E2F1_Q3_01  | E2F-1      | E2F1   | 0.0578629 | 1 |
| V\$ELK1_01     | Elk-1      | ELK1   | 0.026234  | 1 |
| V\$SPI1_Q5     | SPI1       | SPI1   | 0.0172005 | 1 |
| V\$ERM_02      | Erm        | ETV5   | 0.40874   | 1 |
| V\$FOXO4_01    | FOXO4      | FOXO4  | 0.258419  | 1 |
| V\$DEAF1_01    | DEAF1      | DEAF1  | 0.0849712 | 1 |
| V\$CMYB_01     | c-Myb      | MYB    | 0.13213   | 1 |
| V\$AP2ALPHA_02 | AP-2alphaA | TFAP2A | 0.166616  | 1 |
| V\$E2F1_Q4     | E2F-1      | E2F1   | 0.0578629 | 1 |
| V\$HNF1B_01    | HNF-1beta  | HNF1B  | 0.0114803 | 1 |
| V\$HMGY1_Q1    | HMGY1      | HMGY1  | 0.668701  | 1 |
| V\$FOXO3A_Q1   | FOXO3A     | FOXO3  | 0.0267939 | 1 |
| V\$SOX9_B1     | SOX9       | SOX9   | 0.280814  | 1 |
| V\$AML2_01     | AML2       | RUNX3  | 0.0495851 | 1 |
| V\$AP2ALPHA_03 | AP-2alphaA | TFAP2A | 0.166616  | 1 |
| V\$SPI1_03     | SPI1       | SPI1   | 0.0172005 | 1 |

hsa-mir-190a

| Matrix_id      | transcription factor | Gene   | PCC        | Occurrence |
|----------------|----------------------|--------|------------|------------|
| V\$PUR1_Q4     | PUR1                 | PURA   | 0.133412   | 108        |
| V\$PARP_Q4     | PARP                 | PARP1  | 0.147112   | 106        |
| V\$IK_Q5       | Ikaros               | IKZF1  | 0.00502726 | 103        |
| V\$MAFB_Q1     | MAFB                 | MAFB   | 0.0427256  | 101        |
| V\$SMAD4_Q6_Q1 | Smad4                | SMAD4  | 0.0187374  | 99         |
| V\$P300_Q1     | p300                 | EP300  | 0.0592142  | 93         |
| V\$TBP_Q6      | TBP                  | TBP    | 0.041402   | 93         |
| V\$CDX2_Q5_Q2  | CDX-2                | CDX2   | 0.069295   | 93         |
| V\$GR_Q6       | GR                   | NR3C1  | 0.0744042  | 92         |
| V\$SOX9_Q4     | SOX9                 | SOX9   | 0.0183352  | 91         |
| V\$ZIC3_Q1     | Zic3                 | ZIC3   | 0.645027   | 89         |
| V\$SMAD3_Q6_Q1 | Smad3                | SMAD3  | 0.0855845  | 89         |
| V\$MEF2C_Q4    | MEF-2C               | MEF2C  | 0.146786   | 86         |
| V\$HNF4A_Q6_Q1 | HNF-4alpha           | HNF4A  | 0.642871   | 85         |
| V\$CDX2_Q5_Q1  | Cdx-2                | CDX2   | 0.069295   | 82         |
| V\$NANOG_Q2    | Nanog                | NANOG  | 0.00481978 | 81         |
| V\$DLX5_Q1     | dlx5                 | DLX5   | 0.105009   | 80         |
| V\$IPF1_Q1     | IPF1                 | PDX1   | 0.088095   | 78         |
| V\$IPF1_Q6     | IPF1                 | PDX1   | 0.088095   | 75         |
| V\$Elf5_Q3     | ELF5                 | ELF5   | 0.26605    | 74         |
| V\$IPF1_Q4_Q1  | IPF1                 | PDX1   | 0.088095   | 74         |
| V\$GATA3_Q2    | GATA-3               | GATA3  | 0.0440501  | 72         |
| V\$CDX2_Q1     | Cdx-2                | CDX2   | 0.069295   | 70         |
| V\$IRF4_Q6     | IRF-4                | IRF4   | 0.174815   | 68         |
| V\$PBX1_Q4     | Pbx1                 | PBX1   | 0.184061   | 67         |
| V\$PARP_Q3     | PARP                 | PARP1  | 0.147112   | 66         |
| V\$IPF1_Q4     | IPF1                 | PDX1   | 0.088095   | 66         |
| V\$ING4_Q1     | ING4                 | ING4   | 0.255315   | 65         |
| V\$PBX1_Q3     | Pbx1                 | PBX1   | 0.184061   | 64         |
| V\$E47_Q2      | E47                  | TCF3   | 0.0276974  | 63         |
| V\$E2A_Q6      | E2A                  | TCF3   | 0.0276974  | 63         |
| V\$E12_Q6      | E12                  | TCF3   | 0.0276974  | 63         |
| V\$CMaf_Q1     | c-Maf                | MAF    | 0.650497   | 63         |
| V\$GFI1_Q6     | Gfi1                 | GFI1   | 0.0674517  | 62         |
| V\$TEF1_Q6_Q3  | TEF-1                | TEAD1  | 0.0325027  | 61         |
| V\$CEBPE_Q6    | CEBPE                | CEBPE  | 0.233534   | 60         |
| V\$FOXJ2_Q1    | FOXJ2                | FOXJ2  | 0.00802484 | 59         |
| V\$TCF3_Q1     | TCF-3                | TCF7L1 | 0.295958   | 56         |
| V\$PITX3_Q2    | PITX3                | PITX3  | 0.0717642  | 55         |
| V\$GFI1_Q6_Q1  | Gfi1                 | GFI1   | 0.0674517  | 55         |
| V\$SOX10_Q6    | SOX10                | SOX10  | 0.257553   | 54         |



|              |        |               |            |    |
|--------------|--------|---------------|------------|----|
| V\$ARNT_Q1   | Arnt   | ARNT          | 0.117427   | 53 |
| V\$CRX_Q4    | Crx    | CRX           | 0.273239   | 51 |
| V\$OC2_Q3    | OC-2   | ONECUT2       | 0.191773   | 50 |
| V\$IRF8_Q6   | IRF-8  | IRF8          | 0.029708   | 49 |
| V\$NKX2B_Q3  | NKX2B  | NKX2-2        | 0.1974     | 48 |
| V\$E2A_Q2    | E2A    | TCF3          | 0.0276974  | 47 |
| V\$HOXD9_Q2  | Hoxd9  | HOXD9         | 0.221267   | 46 |
| V\$NKX22_Q2  | NKX2B  | NKX2-2        | 0.1974     | 42 |
| V\$HOXA9_Q1  | hoxa9  | HOXA9         | 0.348983   | 40 |
| V\$TFII_Q6   | TFII-I | GTF2I         | 0.405843   | 40 |
| V\$PIT1_Q6   | Pit-1  | POU1F1        | 0.358872   | 39 |
| V\$ZIC1_Q1   | Zic1   | ZIC1          | 0.217433   | 38 |
| V\$CRX_Q2    | Crx    | CRX           | 0.273239   | 35 |
| V\$HNF6_Q6   | HNF6   | ONECUT1       | 0.0380773  | 34 |
| V\$VDR_Q3    | VDR    | VDR           | 0.227117   | 33 |
| V\$DEC2_Q2   |        | 2-Dec BHLHE41 | 0.0108301  | 26 |
| V\$NMYC_Q1   | N-Myc  | MYCN          | 0.116638   | 23 |
| V\$MAX_Q1    | Max    | MAX           | 0.218547   | 23 |
| V\$ARNT_Q2   | Arnt   | ARNT          | 0.117427   | 23 |
| V\$USF2_Q6   | USF2   | USF2          | 0.0933076  | 23 |
| V\$POU6F1_Q3 | POU6F1 | POU6F1        | 0.591134   | 23 |
| V\$SOX2_Q6   | SOX2   | SOX2          | 0.354484   | 21 |
| V\$FOXJ2_Q2  | FOXJ2  | FOXJ2         | 0.00802484 | 18 |
| V\$POU6F1_Q2 | POU6F1 | POU6F1        | 0.591134   | 14 |
| V\$HOXA7_Q1  | HOXA7  | HOXA7         | 0.29698    | 8  |
| V\$MTF1_Q4   | MTF-1  | MTF1          | 0.0232495  | 7  |
| V\$RP58_Q1   | RP58   | ZNF238        | 0.202616   | 3  |

hsa-mir-191

| Matrix_id      | transcription factor | Gene  | PCC        | Occurrence |
|----------------|----------------------|-------|------------|------------|
| V\$PUR1_Q4     | PUR1                 | PURA  | 0.235691   | 133        |
| V\$PARP_Q4     | PARP                 | PARP1 | 0.138169   | 131        |
| V\$ELF1_Q6     | Elf-1                | ELF1  | 0.170718   | 127        |
| V\$GKLF_Q4     | GKLF                 | KLF4  | 0.486987   | 125        |
| V\$MAFB_Q1     | MAFB                 | MAFB  | 0.28932    | 123        |
| V\$P300_Q1     | p300                 | EP300 | 0.16206    | 118        |
| V\$SMAD4_Q6_Q1 | Smad4                | SMAD4 | 0.121392   | 117        |
| V\$SOX9_Q4     | SOX9                 | SOX9  | 0.00311084 | 115        |
| V\$YY1_Q1      | YY1                  | YY1   | 0.413492   | 107        |
| V\$GR_Q6       | GR                   | NR3C1 | 0.0649368  | 104        |
| V\$MEF2C_Q4    | MEF-2C               | MEF2C | 0.0862625  | 93         |
| V\$SOX9_Q1     | SOX9                 | SOX9  | 0.00311084 | 93         |

|                |            |        |           |    |
|----------------|------------|--------|-----------|----|
| V\$DLX5_01     | dlx5       | DLX5   | 0.598519  | 90 |
| V\$ING4_01     | ING4       | ING4   | 0.253979  | 84 |
| V\$GATA3_01    | GATA-3     | GATA3  | 0.792503  | 78 |
| V\$PBX1_Q3     | Pbx1       | PBX1   | 0.0895107 | 75 |
| V\$FKLF_Q5     | FKLF       | KLF11  | 0.109052  | 73 |
| V\$SREBP1_Q6   | SREBP-1    | SREBF1 | 0.404197  | 71 |
| V\$PBX1_Q4     | Pbx1       | PBX1   | 0.0895107 | 71 |
| V\$GATA2_01    | GATA-2     | GATA2  | 0.524715  | 70 |
| V\$GR_01       | GR         | NR3C1  | 0.0649368 | 66 |
| V\$TCF4_01     | TCF-4      | TCF7L2 | 0.39479   | 63 |
| V\$TCF4_Q5     | TCF-4      | TCF7L2 | 0.39479   | 59 |
| V\$CREM_Q6     | CREM       | CREM   | 0.271444  | 54 |
| V\$ZIC1_01     | Zic1       | ZIC1   | 0.149817  | 50 |
| V\$NKX2B_Q3    | NKX2B      | NKX2-2 | 0.0408919 | 50 |
| V\$NKX22_Q2    | NKX2B      | NKX2-2 | 0.0408919 | 45 |
| V\$GABPBETA_Q3 | GABP-beta  | GABPB1 | 0.165157  | 44 |
| V\$HBP1_Q2     | hbp1       | HBP1   | 0.485157  | 44 |
| V\$ESE1_Q3     | ESE-1      | ELF3   | 0.0199231 | 41 |
| V\$CEBPG_Q6_01 | C/EBPgamma | CEBPG  | 0.522346  | 38 |
| V\$ATF3_Q6_01  | ATF-3      | ATF3   | 0.365668  | 37 |
| V\$ESE1_Q2     | ESE-1      | ELF3   | 0.0199231 | 31 |
| V\$HOX13_Q2    | HOXA5      | HOXA5  | 0.0606635 | 28 |
| V\$CEBPG_Q6    | C/EBPgamma | CEBPG  | 0.522346  | 23 |
| V\$IRF1_Q6     | IRF-1      | IRF1   | 0.0552914 | 23 |
| V\$AMEF2_Q6    | aMEF-2     | MEF2A  | 0.104815  | 14 |
| V\$ERR3_Q2_01  | ERR3       | ESRRG  | 0.327532  | 12 |
| V\$ZID_Q1      | ZID        | ZBTB6  | 0.220683  | 11 |

hsa-mir-192

| Matrix_id      | transcription factor | Gene  | PCC       | Occurrence |
|----------------|----------------------|-------|-----------|------------|
| V\$NR1B2_Q6    | NR1B2                | RARB  | 0.174267  | 90         |
| V\$ELF1_Q6     | Elf-1                | ELF1  | 0.263702  | 89         |
| V\$ZIC3_Q1     | Zic3                 | ZIC3  | 0.149787  | 87         |
| V\$MAFB_Q1     | MAFB                 | MAFB  | 0.23255   | 87         |
| V\$TBX5_Q2     | TBX5                 | TBX5  | 0.011504  | 82         |
| V\$CETS1_Q6    | C-ets-1              | ETS1  | 0.179198  | 77         |
| V\$SMAD3_Q6_01 | Smad3                | SMAD3 | 0.0877125 | 75         |
| V\$Elf5_Q3     | ELF5                 | ELF5  | 0.0985981 | 74         |
| V\$GABPA_Q4    | GABP-alpha           | GABPA | 0.422648  | 73         |
| V\$HNF4A_Q6_01 | HNF-4alpha           | HNF4A | 0.538672  | 72         |
| V\$ETS1_B      | c-Ets-1              | ETS1  | 0.179198  | 72         |
| V\$TBX5_Q1     | TBX5                 | TBX5  | 0.011504  | 71         |

|                   |            |         |            |    |
|-------------------|------------|---------|------------|----|
| V\$SOX5_01        | SOX5       | SOX5    | 0.172314   | 70 |
| V\$MYOD_Q6_01     | MyoD       | MYOD1   | 0.245684   | 67 |
| V\$PITX3_Q2       | PITX3      | PITX3   | 0.142364   | 67 |
| V\$ERBETA_Q5      | ER-beta    | ESR2    | 0.298845   | 65 |
| V\$SPI1_Q5        | SPI1       | SPI1    | 0.0790735  | 63 |
| V\$SPI1_Q3        | SPI1       | SPI1    | 0.0790735  | 62 |
| V\$MYOGENIN_Q6    | myogenin   | MYOG    | 0.175591   | 60 |
| V\$ING4_Q1        | ING4       | ING4    | 0.0582535  | 59 |
| V\$CRX_Q4         | Crx        | CRX     | 0.305166   | 58 |
| V\$ERR1_Q3        | ERR1       | ESRRA   | 0.188443   | 55 |
| V\$HNF3B_Q6       | HNF-3beta  | FOXA2   | 0.288641   | 51 |
| V\$CEBPA_Q6       | C/EBPalpha | CEBPA   | 0.735343   | 50 |
| V\$SREBP1_Q6      | SREBP-1    | SREBF1  | 0.0757703  | 48 |
| V\$CRX_Q2         | Crx        | CRX     | 0.305166   | 47 |
| V\$TCF3_Q1        | TCF-3      | TCF7L1  | 0.332695   | 46 |
| V\$MYOGENIN_Q6_Q1 | myogenin   | MYOG    | 0.175591   | 45 |
| V\$HNF1_Q2        | HNF-1alpha | HNF1A   | 0.392393   | 44 |
| V\$CP2_Q1         | CP2        | TFCP2   | 0.00028534 | 44 |
| V\$CEBPE_Q6       | CEBPE      | CEBPE   | 0.113178   | 43 |
| V\$OC2_Q3         | OC-2       | ONECUT2 | 0.104081   | 43 |
| V\$FKLF_Q5        | FKLF       | KLF11   | 0.25873    | 42 |
| V\$ETV3_Q2        | ETV3       | ETV3    | 0.3477     | 41 |
| V\$MYOD_Q6        | MyoD       | MYOD1   | 0.245684   | 40 |
| V\$ER71_Q2        | ER71       | ETV2    | 0.260703   | 40 |
| V\$ETV7_Q1        | ETV7       | ETV7    | 0.0353326  | 39 |
| V\$CRX_Q4_Q1      | CRX        | CRX     | 0.305166   | 39 |
| V\$CEBPB_Q6       | C/EBPbeta  | CEBPB   | 0.0104741  | 38 |
| V\$CEBPB_Q2       | C/EBPbeta  | CEBPB   | 0.0104741  | 37 |
| V\$ESE1_Q3        | ESE-1      | ELF3    | 0.254816   | 36 |
| V\$MYOD_Q6_Q2     | MyoD       | MYOD1   | 0.245684   | 34 |
| V\$MATH1_Q2       | MATH1      | ATOH1   | 0.244011   | 33 |
| V\$ERF_Q2         | ERF        | ERF     | 0.316362   | 33 |
| V\$MYOD_Q1        | MyoD       | MYOD1   | 0.245684   | 30 |
| V\$ESE1_Q2        | ESE-1      | ELF3    | 0.254816   | 29 |
| V\$STAT3_Q3       | STAT3      | STAT3   | 0.233977   | 29 |
| V\$VDR_Q3         | VDR        | VDR     | 0.0688389  | 28 |
| V\$PDEF_Q2        | PDEF       | SPDEF   | 0.0137016  | 24 |
| V\$NCX_Q2         | Ncx        | TLX2    | 0.0481292  | 24 |
| V\$SOX2_Q6        | SOX2       | SOX2    | 0.514508   | 22 |
| V\$CART1_Q2       | CART1      | ALX1    | 0.0783869  | 19 |
| V\$ERG_Q3         | ERG        | ERG     | 0.023064   | 17 |
| V\$PET1_Q2        | Pet-1      | FEV     | 0.0306544  | 16 |
| V\$ERG_Q1         | ERG        | ERG     | 0.023064   | 15 |
| V\$PAX3_B         | Pax-3      | PAX3    | 0.140579   | 13 |
| V\$HOXA7_Q1       | HOXA7      | HOXA7   | 0.501182   | 6  |
| V\$HEN1_Q2        | HEN1       | NHLH1   | 0.164437   | 4  |

|            |      |       |          |   |
|------------|------|-------|----------|---|
| V\$HEN1_01 | HEN1 | NHLH1 | 0.164437 | 3 |
|------------|------|-------|----------|---|

hsa-mir-193b

| Matrix_id      | transcription factor | Gene     | PCC        | Occurrence |
|----------------|----------------------|----------|------------|------------|
| V\$PUR1_Q4     | PUR1                 | PURA     | 0.250979   | 215        |
| V\$PEA3_Q6     | PEA3                 | ETV4     | 0.0872851  | 213        |
| V\$ELF1_Q6     | Elf-1                | ELF1     | 0.216438   | 208        |
| V\$GKLF_Q4     | GKLF                 | KLF4     | 0.108803   | 205        |
| V\$SMAD4_Q6_01 | Smad4                | SMAD4    | 0.156396   | 186        |
| V\$SOX9_Q4     | SOX9                 | SOX9     | 0.107994   | 176        |
| V\$ETS2_Q6     | c-Ets-2              | ETS2     | 0.0430831  | 176        |
| V\$Elf5_03     | ELF5                 | ELF5     | 0.242552   | 173        |
| V\$ETS2_B      | c-Ets-2              | ETS2     | 0.0430831  | 169        |
| V\$SMAD3_Q6_01 | Smad3                | SMAD3    | 0.0159133  | 167        |
| V\$GR_Q6       | GR                   | NR3C1    | 0.209921   | 162        |
| V\$NANOG_02    | Nanog                | NANOG    | 0.0902886  | 159        |
| V\$AP4_Q6_02   | AP-4                 | TFAP4    | 0.077602   | 150        |
| V\$YY1_Q6      | YY1                  | YY1      | 0.0482962  | 142        |
| V\$YY1_Q6_02   | YY1                  | YY1      | 0.0482962  | 142        |
| V\$BEN_01      | BEN                  | GTF2IRD1 | 0.0448514  | 138        |
| V\$AHR_Q5      | AhR                  | AHR      | 0.0839122  | 133        |
| V\$IRF4_Q6     | IRF-4                | IRF4     | 0.0296239  | 131        |
| V\$AP2ALPHA_Q6 | AP-2alpha            | TFAP2A   | 0.0536582  | 130        |
| V\$MYOGENIN_Q6 | myogenin             | MYOG     | 0.0496787  | 125        |
| V\$AP2ALPHA_01 | AP-2alpha            | TFAP2A   | 0.0536582  | 121        |
| V\$WT1_Q6      | WT1                  | WT1      | 0.121693   | 119        |
| V\$GATA3_01    | GATA-3               | GATA3    | 0.0570631  | 119        |
| V\$FKLF_Q5     | FKLF                 | KLF11    | 0.00027765 | 119        |
| V\$ZBP89_Q4    | ZBP89                | ZNF148   | 0.133675   | 118        |
| V\$GATA2_01    | GATA-2               | GATA2    | 0.218081   | 107        |
| V\$TEF1_Q6_03  | TEF-1                | TEAD1    | 0.0556583  | 107        |
| V\$AP4_Q5      | AP-4                 | TFAP4    | 0.077602   | 105        |
| V\$CMaf_01     | c-Maf                | MAF      | 0.151825   | 105        |
| V\$ER71_02     | ER71                 | ETV2     | 0.119802   | 99         |
| V\$TEF1_Q6     | TEF-1                | TEAD1    | 0.0556583  | 98         |
| V\$WT1_Q6_01   | WT1                  | WT1      | 0.121693   | 96         |
| V\$ELF5_01     | ELF5                 | ELF5     | 0.242552   | 93         |
| V\$AP4_Q6      | AP-4                 | TFAP4    | 0.077602   | 92         |
| V\$AP2BETA_Q3  | AP-2beta             | TFAP2B   | 0.00929266 | 90         |
| V\$EGR1_02     | EGR-1                | EGR1     | 0.306662   | 87         |
| V\$SMAD3_Q6    | SMAD3                | SMAD3    | 0.0159133  | 86         |
| V\$ESE1_Q3     | ESE-1                | ELF3     | 0.560503   | 86         |

|                     |                      |        |            |    |
|---------------------|----------------------|--------|------------|----|
| V\$FOXJ2_01         | FOXJ2                | FOXJ2  | 0.0204771  | 86 |
| V\$MYOGENIN_Q6_01   | myogenin             | MYOG   | 0.0496787  | 85 |
| V\$AP2GAMMA_01      | AP-2gamma            | TFAP2C | 0.113782   | 84 |
| V\$GABPBETA_Q3      | GABP-beta            | GABPB1 | 0.120139   | 82 |
| V\$VDR_Q3           | VDR                  | VDR    | 0.145623   | 82 |
| V\$EHF_03           | EHF                  | EHF    | 0.258502   | 81 |
| V\$FAC1_01          | FAC1                 | BPTF   | 0.117772   | 77 |
| V\$ESE1_02          | ESE-1                | ELF3   | 0.560503   | 67 |
| V\$PDEF_02          | PDEF                 | SPDEF  | 0.479045   | 61 |
| V\$STAT3_03         | STAT3                | STAT3  | 0.167708   | 61 |
| V\$FOXO4_02         | FOXO4                | FOXO4  | 0.107459   | 59 |
| V\$ATF3_Q6_01       | ATF-3                | ATF3   | 0.331785   | 56 |
| V\$ATF1_Q6_01       | ATF-1                | ATF1   | 0.148103   | 56 |
| V\$CACCCBINDINGFACT | CACCC-binding factor | ZNF148 | 0.133675   | 55 |
| V\$PET1_02          | Pet-1                | FEV    | 0.318155   | 51 |
| V\$ERG_03           | ERG                  | ERG    | 0.0554592  | 47 |
| V\$SP4_Q5           | SP4                  | SP4    | 0.00014896 | 45 |
| V\$AP4_01           | AP-4                 | TFAP4  | 0.077602   | 43 |
| V\$AR_03            | AR                   | AR     | 0.0487227  | 39 |
| V\$EKLF_Q5          | EKLF                 | KLF1   | 0.0402713  | 39 |
| V\$ERG_01           | ERG                  | ERG    | 0.0554592  | 33 |
| V\$AP2ALPHA_02      | AP-2alphaA           | TFAP2A | 0.0536582  | 32 |
| V\$ATF6_01          | ATF6                 | ATF6   | 0.213098   | 23 |
| V\$RREB1_01         | RREB-1               | RREB1  | 0.0251675  | 22 |
| V\$STAT5A_Q6        | STAT5A               | STAT5A | 0.0362782  | 18 |
| V\$MTF1_Q4          | MTF-1                | MTF1   | 0.0264957  | 13 |
| V\$AR_04            | AR                   | AR     | 0.0487227  | 12 |
| V\$AR_01            | AR                   | AR     | 0.0487227  | 9  |

hsa-mir-194-1

| Matrix_id      | transcription factor | Gene  | PCC       | Occurrence |
|----------------|----------------------|-------|-----------|------------|
| V\$MAFB_01     | MAFB                 | MAFB  | 0.235128  | 109        |
| V\$ELF1_Q6     | Elf-1                | ELF1  | 0.268591  | 109        |
| V\$NR1B2_Q6    | NR1B2                | RARB  | 0.228664  | 107        |
| V\$ZIC3_01     | Zic3                 | ZIC3  | 0.229358  | 106        |
| V\$TBX5_02     | TBX5                 | TBX5  | 0.0245151 | 102        |
| V\$CDX2_Q5_02  | CDX-2                | CDX2  | 0.12792   | 98         |
| V\$CETS1_Q6    | C-ets-1              | ETS1  | 0.222682  | 91         |
| V\$SMAD3_Q6_01 | Smad3                | SMAD3 | 0.119538  | 90         |
| V\$GABPA_Q4    | GABP-alpha           | GABPA | 0.38426   | 86         |
| V\$SOX5_01     | SOX5                 | SOX5  | 0.220517  | 86         |
| V\$TBX5_01     | TBX5                 | TBX5  | 0.0245151 | 85         |

|                   |            |        |            |    |
|-------------------|------------|--------|------------|----|
| V\$HNF4A_Q6_01    | HNF-4alpha | HNF4A  | 0.616141   | 83 |
| V\$DLX5_01        | dlx5       | DLX5   | 0.0106439  | 79 |
| V\$MYOD_Q6_01     | MyoD       | MYOD1  | 0.227871   | 79 |
| V\$PITX3_Q2       | PITX3      | PITX3  | 0.129216   | 78 |
| V\$SPI1_Q5        | SPI1       | SPI1   | 0.0707982  | 74 |
| V\$CDX2_Q5_01     | Cdx-2      | CDX2   | 0.12792    | 73 |
| V\$ING4_01        | ING4       | ING4   | 0.0931472  | 73 |
| V\$CDX2_01        | Cdx-2      | CDX2   | 0.12792    | 73 |
| V\$MYOGENIN_Q6    | myogenin   | MYOG   | 0.202626   | 71 |
| V\$LRF_Q2         | LRF        | ZBTB7A | 0.147518   | 68 |
| V\$CRX_Q4         | Crx        | CRX    | 0.346269   | 68 |
| V\$TEF1_Q6_03     | TEF-1      | TEAD1  | 0.00561956 | 64 |
| V\$HNF3B_Q6       | HNF-3beta  | FOXA2  | 0.236636   | 63 |
| V\$TCF3_01        | TCF-3      | TCF7L1 | 0.397798   | 62 |
| V\$TEF1_Q6        | TEF-1      | TEAD1  | 0.00561956 | 58 |
| V\$ERR1_Q3        | ERR1       | ESRRA  | 0.211782   | 57 |
| V\$CMF1_Q1        | c-Maf      | MAF    | 0.490326   | 57 |
| V\$HNF3A_Q1       | HNF3A      | FOXA1  | 0.111148   | 54 |
| V\$MYOGENIN_Q6_01 | myogenin   | MYOG   | 0.202626   | 52 |
| V\$CRX_Q2         | Crx        | CRX    | 0.346269   | 52 |
| V\$MYOD_Q6        | MyoD       | MYOD1  | 0.227871   | 49 |
| V\$NKX2B_Q3       | NKX2B      | NKX2-2 | 0.0238043  | 48 |
| V\$SMAD3_Q6       | SMAD3      | SMAD3  | 0.119538   | 47 |
| V\$ELF5_Q1        | ELF5       | ELF5   | 0.155551   | 47 |
| V\$FOXP3_Q1       | FOXP3      | FOXP3  | 0.062356   | 46 |
| V\$NKX22_Q2       | NKX2B      | NKX2-2 | 0.0238043  | 45 |
| V\$MATH1_Q2       | MATH1      | ATOH1  | 0.294356   | 40 |
| V\$HOXA9_Q1       | hoxa9      | HOXA9  | 0.301727   | 40 |
| V\$PAX8_Q1        | Pax-8      | PAX8   | 0.128525   | 40 |
| V\$MYOD_Q6_02     | MyoD       | MYOD1  | 0.227871   | 38 |
| V\$MYOD_Q1        | MyoD       | MYOD1  | 0.227871   | 37 |
| V\$CDX1_Q1        | Cdx-1      | CDX1   | 0.374303   | 35 |
| V\$P53_Q2         | p53        | TP53   | 0.0126346  | 34 |
| V\$MITF_Q6        | MITF       | MITF   | 0.0671485  | 32 |
| V\$CDX2_Q5        | Cdx-2      | CDX2   | 0.12792    | 28 |
| V\$HOXD9_Q2       | Hoxd9      | HOXD9  | 0.0550375  | 28 |
| V\$ATF3_Q6_01     | ATF-3      | ATF3   | 0.0805224  | 28 |
| V\$EAR2_Q2        | EAR2       | NR2F6  | 0.514834   | 25 |
| V\$PAX3_B         | Pax-3      | PAX3   | 0.167833   | 15 |
| V\$RREB1_Q1       | RREB-1     | RREB1  | 0.0548464  | 14 |
| V\$ATF5_Q1        | ATF5       | ATF5   | 0.638786   | 14 |
| V\$STAT5A_Q6      | STAT5A     | STAT5A | 0.00497811 | 9  |

| Matrix_id         | transcription factor | Gene    | PCC        | Occurrence |
|-------------------|----------------------|---------|------------|------------|
| V\$MAFB_01        | MAFB                 | MAFB    | 0.235128   | 109        |
| V\$ELF1_Q6        | Elf-1                | ELF1    | 0.268591   | 109        |
| V\$NR1B2_Q6       | NR1B2                | RARB    | 0.228664   | 107        |
| V\$ZIC3_01        | Zic3                 | ZIC3    | 0.229358   | 106        |
| V\$TBX5_02        | TBX5                 | TBX5    | 0.0245151  | 102        |
| V\$CETS1_Q6       | C-ets-1              | ETS1    | 0.222682   | 91         |
| V\$SMAD3_Q6_01    | Smad3                | SMAD3   | 0.119538   | 90         |
| V\$Elf5_03        | ELF5                 | ELF5    | 0.155551   | 89         |
| V\$ETS1_B         | c-Ets-1              | ETS1    | 0.222682   | 87         |
| V\$GABPA_Q4       | GABP-alpha           | GABPA   | 0.38426    | 86         |
| V\$SOX5_01        | SOX5                 | SOX5    | 0.220517   | 86         |
| V\$TBX5_01        | TBX5                 | TBX5    | 0.0245151  | 85         |
| V\$HNF4A_Q6_01    | HNF-4alpha           | HNF4A   | 0.616141   | 83         |
| V\$ERBETA_Q5      | ER-beta              | ESR2    | 0.303082   | 81         |
| V\$DLX5_01        | dlx5                 | DLX5    | 0.0106439  | 79         |
| V\$MYOD_Q6_01     | MyoD                 | MYOD1   | 0.227871   | 79         |
| V\$PITX3_Q2       | PITX3                | PITX3   | 0.129216   | 78         |
| V\$SPI1_03        | SPI1                 | SPI1    | 0.0707982  | 77         |
| V\$SPI1_Q5        | SPI1                 | SPI1    | 0.0707982  | 74         |
| V\$ING4_01        | ING4                 | ING4    | 0.0931472  | 73         |
| V\$MYOGENIN_Q6    | myogenin             | MYOG    | 0.202626   | 71         |
| V\$CRX_Q4         | Crx                  | CRX     | 0.346269   | 68         |
| V\$TEF1_Q6_03     | TEF-1                | TEAD1   | 0.00561956 | 64         |
| V\$HNF3B_Q6       | HNF-3beta            | FOXA2   | 0.236636   | 63         |
| V\$TCF3_01        | TCF-3                | TCF7L1  | 0.397798   | 62         |
| V\$CEBPA_Q6       | C/EBPalpha           | CEBPA   | 0.668309   | 59         |
| V\$TEF1_Q6        | TEF-1                | TEAD1   | 0.00561956 | 58         |
| V\$ERR1_Q3        | ERR1                 | ESRRA   | 0.211782   | 57         |
| V\$SREBP1_Q6      | SREBP-1              | SREBF1  | 0.0919328  | 55         |
| V\$HNF1_02        | HNF-1alpha           | HNF1A   | 0.401178   | 53         |
| V\$ETV3_02        | ETV3                 | ETV3    | 0.318269   | 53         |
| V\$ETV7_01        | ETV7                 | ETV7    | 0.0610358  | 52         |
| V\$OC2_Q3         | OC-2                 | ONECUT2 | 0.146364   | 52         |
| V\$CRX_02         | Crx                  | CRX     | 0.346269   | 52         |
| V\$MYOGENIN_Q6_01 | myogenin             | MYOG    | 0.202626   | 52         |
| V\$CEBPE_Q6       | CEBPE                | CEBPE   | 0.145397   | 52         |
| V\$ER71_02        | ER71                 | ETV2    | 0.317594   | 52         |
| V\$MYOD_Q6        | MyoD                 | MYOD1   | 0.227871   | 49         |
| V\$CP2_01         | CP2                  | TFCP2   | 0.0443438  | 49         |
| V\$FKLF_Q5        | FKLF                 | KLF11   | 0.24671    | 48         |
| V\$ESE1_Q3        | ESE-1                | ELF3    | 0.278426   | 47         |
| V\$EHF_03         | EHF                  | EHF     | 0.00760882 | 46         |
| V\$CRX_Q4_01      | CRX                  | CRX     | 0.346269   | 45         |

|               |       |       |           |    |
|---------------|-------|-------|-----------|----|
| V\$ERF_02     | ERF   | ERF   | 0.298374  | 41 |
| V\$MATH1_Q2   | MATH1 | ATOH1 | 0.294356  | 40 |
| V\$EGR1_02    | EGR-1 | EGR1  | 0.0176089 | 39 |
| V\$MYOD_Q6_02 | MyoD  | MYOD1 | 0.227871  | 38 |
| V\$STAT3_03   | STAT3 | STAT3 | 0.313471  | 38 |
| V\$MYOD_01    | MyoD  | MYOD1 | 0.227871  | 37 |
| V\$VDR_Q3     | VDR   | VDR   | 0.111962  | 36 |
| V\$ESE1_02    | ESE-1 | ELF3  | 0.278426  | 35 |
| V\$NCX_02     | Ncx   | TLX2  | 0.0447467 | 34 |
| V\$PDEF_02    | PDEF  | SPDEF | 0.0290947 | 31 |
| V\$CART1_02   | CART1 | ALX1  | 0.122074  | 25 |
| V\$SOX2_Q6    | SOX2  | SOX2  | 0.519907  | 23 |
| V\$PET1_02    | Pet-1 | FEV   | 0.0516993 | 20 |
| V\$ERG_03     | ERG   | ERG   | 0.0692334 | 20 |
| V\$ERG_01     | ERG   | ERG   | 0.0692334 | 17 |
| V\$PAX3_B     | Pax-3 | PAX3  | 0.167833  | 15 |
| V\$HOXA7_01   | HOXA7 | HOXA7 | 0.525252  | 9  |
| V\$HEN1_02    | HEN1  | NHLH1 | 0.24943   | 6  |
| V\$HEN1_01    | HEN1  | NHLH1 | 0.24943   | 4  |

hsa-mir-196a-1

| Matrix_id      | transcription factor | Gene   | PCC       | Occurrence |
|----------------|----------------------|--------|-----------|------------|
| V\$PARP_Q4     | PARP                 | PARP1  | 0.29521   | 18         |
| V\$AP2REP_01   | AP-2rep              | KLF12  | 0.370644  | 18         |
| V\$PEA3_Q6     | PEA3                 | ETV4   | 0.33916   | 17         |
| V\$PUR1_Q4     | PUR1                 | PURA   | 0.345507  | 17         |
| V\$GATA1_01    | GATA-1               | GATA1  | 0.0580835 | 17         |
| V\$CDX2_Q5_02  | CDX-2                | CDX2   | 0.475056  | 16         |
| V\$ETS1_B      | c-Ets-1              | ETS1   | 0.205573  | 16         |
| V\$DLX5_01     | dlx5                 | DLX5   | 0.199298  | 16         |
| V\$TBP_Q6      | TBP                  | TBP    | 0.216329  | 16         |
| V\$NFAT4_Q3    | NF-AT4               | NFATC3 | 0.261278  | 15         |
| V\$ETS2_Q6     | c-Ets-2              | ETS2   | 0.225616  | 15         |
| V\$MEF2C_Q4    | MEF-2C               | MEF2C  | 0.122383  | 15         |
| V\$CMYB_Q5     | c-Myb                | MYB    | 0.0527704 | 15         |
| V\$MYB_Q6      | c-Myb                | MYB    | 0.0527704 | 15         |
| V\$NR1B2_Q6    | NR1B2                | RARB   | 0.475451  | 15         |
| V\$P300_01     | p300                 | EP300  | 0.424479  | 15         |
| V\$CETS1_Q6    | C-ets-1              | ETS1   | 0.205573  | 15         |
| V\$SMAD4_Q6_01 | Smad4                | SMAD4  | 0.500799  | 14         |
| V\$ZIC3_01     | Zic3                 | ZIC3   | 0.562652  | 14         |
| V\$YY1_01      | YY1                  | YY1    | 0.168675  | 14         |



|                   |            |        |           |    |
|-------------------|------------|--------|-----------|----|
| V\$IPF1_01        | IPF1       | PDX1   | 0.470566  | 14 |
| V\$GATA1_02       | GATA-1     | GATA1  | 0.0580835 | 14 |
| V\$PITX3_Q2       | PITX3      | PITX3  | 0.226267  | 14 |
| V\$Elf5_03        | ELF5       | ELF5   | 0.149021  | 14 |
| V\$CRX_Q4         | Crx        | CRX    | 0.473552  | 13 |
| V\$GFI1_Q6        | Gfi1       | GFI1   | 0.206615  | 13 |
| V\$SMAD3_Q6_01    | Smad3      | SMAD3  | 0.479328  | 13 |
| V\$HNF4A_Q6_01    | HNF-4alpha | HNF4A  | 0.489039  | 13 |
| V\$SOX5_01        | SOX5       | SOX5   | 0.374336  | 13 |
| V\$GATA3_01       | GATA-3     | GATA3  | 0.0413238 | 13 |
| V\$GATA1_04       | GATA-1     | GATA1  | 0.0580835 | 13 |
| V\$SRY_02         | SRY        | SRY    | 0.399646  | 13 |
| V\$GABPA_Q4       | GABP-alpha | GABPA  | 0.0585698 | 13 |
| V\$GR_Q6          | GR         | NR3C1  | 0.560868  | 13 |
| V\$PARP_Q3        | PARP       | PARP1  | 0.29521   | 13 |
| V\$YY1_Q6         | YY1        | YY1    | 0.168675  | 13 |
| V\$PBX1_04        | Pbx1       | PBX1   | 0.327322  | 12 |
| V\$GFI1_Q6_01     | Gfi1       | GFI1   | 0.206615  | 12 |
| V\$ETS2_B         | c-Ets-2    | ETS2   | 0.225616  | 12 |
| V\$TCF3_01        | TCF-3      | TCF7L1 | 0.499692  | 12 |
| V\$CEBPE_Q6       | CEBPE      | CEBPE  | 0.0736575 | 12 |
| V\$GATA1_06       | GATA-1     | GATA1  | 0.0580835 | 11 |
| V\$GATA1_05       | GATA-1     | GATA1  | 0.0580835 | 11 |
| V\$CIIZ_01        | CIIZ       | ZNF384 | 0.474889  | 11 |
| V\$CMYB_01        | c-Myb      | MYB    | 0.0527704 | 11 |
| V\$CDX2_Q5_01     | Cdx-2      | CDX2   | 0.475056  | 11 |
| V\$CDX2_01        | Cdx-2      | CDX2   | 0.475056  | 11 |
| V\$GATA2_02       | GATA-2     | GATA2  | 0.30476   | 11 |
| V\$GATA3_02       | GATA-3     | GATA3  | 0.0413238 | 11 |
| V\$CRX_Q4_01      | CRX        | CRX    | 0.473552  | 11 |
| V\$TBX5_02        | TBX5       | TBX5   | 0.27336   | 11 |
| V\$AP4_Q6_02      | AP-4       | TFAP4  | 0.358319  | 10 |
| V\$ERR1_Q3        | ERR1       | ESRRA  | 0.324647  | 10 |
| V\$TCF4_01        | TCF-4      | TCF7L2 | 0.045116  | 10 |
| V\$HNF1_02        | HNF-1alpha | HNF1A  | 0.404818  | 10 |
| V\$YY1_Q6_03      | YY1        | YY1    | 0.168675  | 10 |
| V\$IRF4_Q6        | IRF-4      | IRF4   | 0.559725  | 10 |
| V\$NFAT2_Q5       | NF-AT2     | NFATC1 | 0.350808  | 10 |
| V\$IPF1_Q6        | IPF1       | PDX1   | 0.470566  | 9  |
| V\$PITX1_01       | Pitx1      | PITX1  | 0.428517  | 9  |
| V\$PBX1_Q3        | Pbx1       | PBX1   | 0.327322  | 9  |
| V\$IPF1_Q4_01     | IPF1       | PDX1   | 0.470566  | 9  |
| V\$YY1_Q6_02      | YY1        | YY1    | 0.168675  | 9  |
| V\$MYOGENIN_Q6_01 | myogenin   | MYOG   | 0.490776  | 8  |
| V\$BCL6_Q3_01     | Bcl-6      | BCL6   | 0.388452  | 8  |
| V\$PITX2_01       | PITX2      | PITX2  | 0.329188  | 8  |

|               |           |         |           |   |
|---------------|-----------|---------|-----------|---|
| V\$IPF1_Q4    | IPF1      | PDX1    | 0.470566  | 8 |
| V\$SMAD3_Q6   | SMAD3     | SMAD3   | 0.479328  | 8 |
| V\$HNF3A_01   | HNF3A     | FOXA1   | 0.235549  | 8 |
| V\$GR_01      | GR        | NR3C1   | 0.560868  | 8 |
| V\$HOXA9_01   | hoxa9     | HOXA9   | 0.831662  | 8 |
| V\$RFX1_02    | RFX1      | RFX1    | 0.480903  | 8 |
| V\$CRX_02     | Crx       | CRX     | 0.473552  | 8 |
| V\$AP4_Q5     | AP-4      | TFAP4   | 0.358319  | 8 |
| V\$RFX1_01    | RFX1      | RFX1    | 0.480903  | 8 |
| V\$AP4_Q6     | AP-4      | TFAP4   | 0.358319  | 8 |
| V\$MEF2A_Q6   | mef2A     | MEF2A   | 0.108691  | 7 |
| V\$MSX1_01    | Msx-1     | MSX1    | 0.609175  | 7 |
| V\$TR4_Q2     | TR4       | NR2C2   | 0.453818  | 6 |
| V\$MATH1_Q2   | MATH1     | ATOH1   | 0.456671  | 6 |
| V\$NURR1_Q3   | NURR1     | NR4A2   | 0.0894904 | 6 |
| V\$FOXJ2_02   | FOXJ2     | FOXJ2   | 0.334262  | 6 |
| V\$HNF1B_01   | HNF-1beta | HNF1B   | 0.7965    | 6 |
| V\$TEF1_Q6    | TEF-1     | TEAD1   | 0.476219  | 6 |
| V\$GATA3_03   | GATA-3    | GATA3   | 0.0413238 | 5 |
| V\$TEF1_Q6_03 | TEF-1     | TEAD1   | 0.476219  | 5 |
| V\$HNF6_Q6    | HNF6      | ONECUT1 | 0.133906  | 5 |
| V\$p53_02     | p53       | TP53    | 0.171675  | 5 |
| V\$STAT3_03   | STAT3     | STAT3   | 0.411935  | 5 |
| V\$EAR2_Q2    | EAR2      | NR2F6   | 0.105561  | 5 |
| V\$OC2_Q3     | OC-2      | ONECUT2 | 0.353174  | 4 |
| V\$PIT1_Q6    | Pit-1     | POU1F1  | 0.19872   | 4 |
| V\$NKX32_02   | Nkx3-2    | NKX3-2  | 0.433654  | 4 |
| V\$NKX32_01   | Nkx3-2    | NKX3-2  | 0.433654  | 4 |
| V\$STAT1_05   | STAT1     | STAT1   | 0.0832112 | 4 |
| V\$STAT4_Q5   | STAT4     | STAT4   | 0.434385  | 3 |
| V\$POU6F1_02  | POU6F1    | POU6F1  | 0.476432  | 3 |
| V\$IRF1_Q6_01 | IRF-1     | IRF1    | 0.138728  | 3 |
| V\$HBP1_Q2    | hbp1      | HBP1    | 0.328796  | 3 |
| V\$POU6F1_03  | POU6F1    | POU6F1  | 0.476432  | 3 |
| V\$RSRFC4_Q2  | RSRFC4    | MEF2A   | 0.108691  | 3 |
| V\$STAT1_Q6   | STAT1     | STAT1   | 0.0832112 | 3 |
| V\$FAC1_01    | FAC1      | BPTF    | 0.256198  | 3 |
| V\$YY1_03     | YY1       | YY1     | 0.168675  | 2 |
| V\$NANOG_01   | Nanog     | NANOG   | 0.482623  | 2 |
| V\$RSRFC4_01  | RSRFC4    | MEF2A   | 0.108691  | 2 |
| V\$POU3F2_02  | POU3F2    | POU3F2  | 0.323801  | 2 |
| V\$BACH2_01   | Bach2     | BACH2   | 0.479248  | 1 |

| Matrix_id      | transcription factor | Gene     | PCC       | Occurrence |
|----------------|----------------------|----------|-----------|------------|
| V\$PARP_Q4     | PARP                 | PARP1    | 0.29521   | 18         |
| V\$IK_Q5       | Ikaros               | IKZF1    | 0.38432   | 18         |
| V\$PEA3_Q6     | PEA3                 | ETV4     | 0.33916   | 17         |
| V\$PUR1_Q4     | PUR1                 | PURA     | 0.345507  | 17         |
| V\$NANOG_Q2    | Nanog                | NANOG    | 0.482623  | 17         |
| V\$GATA1_Q1    | GATA-1               | GATA1    | 0.0580835 | 17         |
| V\$TBP_Q6      | TBP                  | TBP      | 0.216329  | 16         |
| V\$DLX5_Q1     | dlx5                 | DLX5     | 0.199298  | 16         |
| V\$CDX2_Q5_Q2  | CDX-2                | CDX2     | 0.475056  | 16         |
| V\$ETS1_B      | c-Ets-1              | ETS1     | 0.205573  | 16         |
| V\$CETS1_Q6    | C-ets-1              | ETS1     | 0.205573  | 15         |
| V\$ETS2_Q6     | c-Ets-2              | ETS2     | 0.225616  | 15         |
| V\$NFAT4_Q3    | NF-AT4               | NFATC3   | 0.261278  | 15         |
| V\$NR1B2_Q6    | NR1B2                | RARB     | 0.475451  | 15         |
| V\$P300_Q1     | p300                 | EP300    | 0.424479  | 15         |
| V\$ELF5_Q3     | ELF5                 | ELF5     | 0.149021  | 14         |
| V\$YY1_Q1      | YY1                  | YY1      | 0.168675  | 14         |
| V\$ZIC3_Q1     | Zic3                 | ZIC3     | 0.562652  | 14         |
| V\$SMAD4_Q6_Q1 | Smad4                | SMAD4    | 0.500799  | 14         |
| V\$IPF1_Q1     | IPF1                 | PDX1     | 0.470566  | 14         |
| V\$YY1_Q6      | YY1                  | YY1      | 0.168675  | 13         |
| V\$HNF4A_Q6_Q1 | HNF-4alpha           | HNF4A    | 0.489039  | 13         |
| V\$GR_Q6       | GR                   | NR3C1    | 0.560868  | 13         |
| V\$SMAD3_Q6_Q1 | Smad3                | SMAD3    | 0.479328  | 13         |
| V\$GABPA_Q4    | GABP-alpha           | GABPA    | 0.0585698 | 13         |
| V\$PARP_Q3     | PARP                 | PARP1    | 0.29521   | 13         |
| V\$ETS2_B      | c-Ets-2              | ETS2     | 0.225616  | 12         |
| V\$PBX1_Q4     | Pbx1                 | PBX1     | 0.327322  | 12         |
| V\$SOX10_Q6    | SOX10                | SOX10    | 0.101599  | 12         |
| V\$ELK1_Q2     | Elk-1                | ELK1     | 0.34349   | 11         |
| V\$CP2_Q1      | CP2                  | TFCP2    | 0.218464  | 11         |
| V\$IRF8_Q6     | IRF-8                | IRF8     | 0.139038  | 11         |
| V\$GATA1_Q5    | GATA-1               | GATA1    | 0.0580835 | 11         |
| V\$CDX2_Q5_Q1  | Cdx-2                | CDX2     | 0.475056  | 11         |
| V\$TEL1_Q2     | TEL1                 | ETV6     | 0.347328  | 11         |
| V\$CMYB_Q1     | c-Myb                | MYB      | 0.0527704 | 11         |
| V\$HNF3B_Q6    | HNF-3beta            | FOXA2    | 0.080954  | 11         |
| V\$GATA2_Q2    | GATA-2               | GATA2    | 0.30476   | 11         |
| V\$GATA1_Q6    | GATA-1               | GATA1    | 0.0580835 | 11         |
| V\$HNF1_Q2     | HNF-1alpha           | HNF1A    | 0.404818  | 10         |
| V\$BEN_Q1      | BEN                  | GTF2IRD1 | 0.409773  | 10         |
| V\$SP1_Q6      | Sp1                  | SP1      | 0.256793  | 10         |
| V\$FOXM1_Q1    | FOXM1                | FOXM1    | 0.0327286 | 10         |

|                   |           |        |           |    |
|-------------------|-----------|--------|-----------|----|
| V\$YY1_Q6_03      | YY1       | YY1    | 0.168675  | 10 |
| V\$FOXO3A_Q1      | FOXO3A    | FOXO3  | 0.350279  | 10 |
| V\$AP2ALPHA_01    | AP-2alpha | TFAP2A | 0.0481473 | 10 |
| V\$AML1_Q6        | AML1      | RUNX1  | 0.192676  | 10 |
| V\$SP1_Q6_01      | Sp1       | SP1    | 0.256793  | 10 |
| V\$ZBP89_Q4       | ZBP89     | ZNF148 | 0.421641  | 10 |
| V\$AP4_Q6_02      | AP-4      | TFAP4  | 0.358319  | 10 |
| V\$ERBETA_Q5      | ER-beta   | ESR2   | 0.380733  | 10 |
| V\$NFAT2_Q5       | NF-AT2    | NFATC1 | 0.350808  | 10 |
| V\$LRF_Q2         | LRF       | ZBTB7A | 0.401618  | 10 |
| V\$LHX3b_01       | LHX3b     | LHX3   | 0.363009  | 9  |
| V\$FOXP3_01       | FOXP3     | FOXP3  | 0.527612  | 9  |
| V\$ETV3_02        | ETV3      | ETV3   | 0.0450707 | 9  |
| V\$AP2ALPHA_Q6    | AP-2alpha | TFAP2A | 0.0481473 | 9  |
| V\$ER71_02        | ER71      | ETV2   | 0.465185  | 9  |
| V\$DAX1_01        | Dax1      | NR0B1  | 0.191542  | 9  |
| V\$MYOGENIN_Q6    | myogenin  | MYOG   | 0.490776  | 9  |
| V\$SP1_Q4_01      | Sp1       | SP1    | 0.256793  | 9  |
| V\$FOXJ2_01       | FOXJ2     | FOXJ2  | 0.334262  | 9  |
| V\$YY1_Q6_02      | YY1       | YY1    | 0.168675  | 9  |
| V\$IPF1_06        | ipf1      | PDX1   | 0.470566  | 8  |
| V\$WT1_Q6_01      | WT1       | WT1    | 0.532888  | 8  |
| V\$RFX1_01        | RFX1      | RFX1   | 0.480903  | 8  |
| V\$SP1_Q2_01      | Sp1       | SP1    | 0.256793  | 8  |
| V\$AP2GAMMA_01    | AP-2gamma | TFAP2C | 0.0835625 | 8  |
| V\$CREM_Q6        | CREM      | CREM   | 0.122999  | 8  |
| V\$RFX1_02        | RFX1      | RFX1   | 0.480903  | 8  |
| V\$AP4_Q6         | AP-4      | TFAP4  | 0.358319  | 8  |
| V\$MYOGENIN_Q6_01 | myogenin  | MYOG   | 0.490776  | 8  |
| V\$CART1_02       | CART1     | ALX1   | 0.52064   | 8  |
| V\$IPF1_03        | IPF1      | PDX1   | 0.470566  | 8  |
| V\$ETV7_01        | ETV7      | ETV7   | 0.454921  | 8  |
| V\$HOX13_02       | HOXA5     | HOXA5  | 0.0385795 | 8  |
| V\$AP4_Q5         | AP-4      | TFAP4  | 0.358319  | 8  |
| V\$EGR1_02        | EGR-1     | EGR1   | 0.295031  | 7  |
| V\$SP1_02         | SP1       | SP1    | 0.256793  | 7  |
| V\$AP4_Q6_01      | AP-4      | TFAP4  | 0.358319  | 7  |
| V\$MAZ_Q6         | MAZ       | MAZ    | 0.0900641 | 7  |
| V\$MAZ_Q6_01      | MAZ       | MAZ    | 0.0900641 | 6  |
| V\$MITF_Q6        | MITF      | MITF   | 0.728963  | 6  |
| V\$EHF_03         | EHF       | EHF    | 0.0979391 | 6  |
| V\$NURR1_Q3       | NURR1     | NR4A2  | 0.0894904 | 6  |
| V\$MATH1_Q2       | MATH1     | ATO1H1 | 0.456671  | 6  |
| V\$WT1_Q6         | WT1       | WT1    | 0.532888  | 6  |
| V\$ATF1_Q6_01     | ATF-1     | ATF1   | 0.264549  | 6  |
| V\$ESE1_Q3        | ESE-1     | ELF3   | 0.197042  | 6  |

|               |          |          |           |   |
|---------------|----------|----------|-----------|---|
| V\$CNOT3_01   | CNOT3    | CNOT3    | 0.413318  | 5 |
| V\$ZFX_01     | Zfx      | ZFX      | 0.441189  | 5 |
| V\$MYOD_Q6_02 | MyoD     | MYOD1    | 0.379909  | 5 |
| V\$KLF15_Q2   | KLF15    | KLF15    | 0.0538967 | 5 |
| V\$PDEF_02    | PDEF     | SPDEF    | 0.1032    | 5 |
| V\$GATA3_03   | GATA-3   | GATA3    | 0.0413238 | 5 |
| V\$TFIIQ6     | TFII-I   | GTF2I    | 0.389862  | 5 |
| V\$AP2BETA_Q3 | AP-2beta | TFAP2B   | 0.549085  | 5 |
| V\$ATF3_Q6_01 | ATF-3    | ATF3     | 0.20822   | 4 |
| V\$YY1_02     | YY1      | YY1      | 0.168675  | 4 |
| V\$ATF4_Q6    | ATF-4    | ATF4     | 0.29356   | 4 |
| V\$NKX32_01   | Nkx3-2   | NKX3-2   | 0.433654  | 4 |
| V\$BEN_02     | BEN      | GTF2IRD1 | 0.409773  | 4 |
| V\$RORBETA_Q2 | RORBETA  | RORB     | 0.270586  | 4 |
| V\$VDR_Q3     | VDR      | VDR      | 0.462669  | 4 |
| V\$E2F1_Q6    | E2F-1    | E2F1     | 0.378501  | 4 |
| V\$E2F1_Q3    | E2F-1    | E2F1     | 0.378501  | 4 |
| V\$E2F4_Q6    | E2F-4    | E2F4     | 0.278213  | 3 |
| V\$ATF2_Q5    | ATF-2    | ATF2     | 0.445493  | 3 |
| V\$SPIB_01    | SPI-B    | SPIB     | 0.146831  | 3 |
| V\$RREB1_01   | RREB-1   | RREB1    | 0.356807  | 3 |
| V\$SPIB_03    | Spi-B    | SPIB     | 0.146831  | 3 |
| V\$PAX3_B     | Pax-3    | PAX3     | 0.148743  | 3 |
| V\$E4F1_Q6_01 | E4F1     | E4F1     | 0.0145789 | 2 |
| V\$NANOG_01   | Nanog    | NANOG    | 0.482623  | 2 |
| V\$YY1_03     | YY1      | YY1      | 0.168675  | 2 |
| V\$ELK1_01    | Elk-1    | ELK1     | 0.34349   | 1 |

hsa-mir-196b

| Matrix_id   | transcription factor | Gene  | PCC        | Occurrence |
|-------------|----------------------|-------|------------|------------|
| V\$GATA2_02 | GATA-2               | GATA2 | 0.531924   | 6          |
| V\$GATA1_05 | GATA-1               | GATA1 | 0.121931   | 6          |
| V\$GATA1_06 | GATA-1               | GATA1 | 0.121931   | 6          |
| V\$GKLF_Q4  | GKLF                 | KLF4  | 0.0695809  | 6          |
| V\$CMYB_Q5  | c-Myb                | MYB   | 0.064782   | 6          |
| V\$PUR1_Q4  | PUR1                 | PURA  | 0.552476   | 6          |
| V\$ZIC3_01  | Zic3                 | ZIC3  | 0.152285   | 6          |
| V\$PBX1_04  | Pbx1                 | PBX1  | 0.565614   | 6          |
| V\$PARP_Q3  | PARP                 | PARP1 | 0.00011251 | 6          |
| V\$PEA3_Q6  | PEA3                 | ETV4  | 0.0261107  | 6          |
| V\$IK_Q5    | Ikaros               | IKZF1 | 0.0298819  | 6          |
| V\$WT1_Q6   | WT1                  | WT1   | 0.607949   | 6          |

|                |            |        |            |   |
|----------------|------------|--------|------------|---|
| V\$ELF1_Q6     | Elf-1      | ELF1   | 0.23711    | 6 |
| V\$MYB_Q6      | c-Myb      | MYB    | 0.064782   | 6 |
| V\$SMAD3_Q6_01 | Smad3      | SMAD3  | 0.155295   | 6 |
| V\$PARP_Q4     | PARP       | PARP1  | 0.00011251 | 6 |
| V\$HNF4A_Q6_01 | HNF-4alpha | HNF4A  | 0.041274   | 6 |
| V\$SMAD4_Q6_01 | Smad4      | SMAD4  | 0.478239   | 6 |
| V\$NR1B2_Q6    | NR1B2      | RARB   | 0.123795   | 6 |
| V\$NFAT4_Q3    | NF-AT4     | NFATC3 | 0.164295   | 5 |
| V\$SOX5_01     | SOX5       | SOX5   | 0.0410747  | 5 |
| V\$P300_01     | p300       | EP300  | 0.210786   | 5 |
| V\$NKX32_01    | Nkx3-2     | NKX3-2 | 0.141552   | 5 |
| V\$SP1_01      | Sp1        | SP1    | 0.0948142  | 5 |
| V\$TFII_Q6     | TFII-I     | GTF2I  | 0.189732   | 5 |
| V\$CMYB_01     | c-Myb      | MYB    | 0.064782   | 5 |
| V\$CDX2_Q5_02  | CDX-2      | CDX2   | 0.0779083  | 5 |
| V\$TBP_Q6      | TBP        | TBP    | 0.0810398  | 5 |
| V\$AP2ALPHA_Q6 | AP-2alpha  | TFAP2A | 0.182437   | 5 |
| V\$GATA1_Q2    | GATA-1     | GATA1  | 0.121931   | 5 |
| V\$FKLF_Q5     | FKLF       | KLF11  | 0.0407377  | 5 |
| V\$GATA1_Q1    | GATA-1     | GATA1  | 0.121931   | 5 |
| V\$CDX2_Q5_01  | Cdx-2      | CDX2   | 0.0779083  | 4 |
| V\$AP2BETA_Q3  | AP-2beta   | TFAP2B | 0.155885   | 4 |
| V\$IRF4_Q6     | IRF-4      | IRF4   | 0.179097   | 4 |
| V\$LRF_Q2      | LRF        | ZBTB7A | 0.11217    | 4 |
| V\$YY1_Q6_02   | YY1        | YY1    | 0.367346   | 4 |
| V\$NKX32_Q2    | Nkx3-2     | NKX3-2 | 0.141552   | 4 |
| V\$YY1_Q6      | YY1        | YY1    | 0.367346   | 4 |
| V\$GR_Q6       | GR         | NR3C1  | 0.585482   | 4 |
| V\$VDR_Q3      | VDR        | VDR    | 0.0510964  | 4 |
| V\$AP2ALPHA_Q1 | AP-2alpha  | TFAP2A | 0.182437   | 4 |
| V\$PITX2_Q2    | Pitx2      | PITX2  | 0.21196    | 4 |
| V\$CRX_Q4      | Crx        | CRX    | 0.00887493 | 4 |
| V\$SRX_Q2      | SRX        | SRX    | 0.286663   | 4 |
| V\$GATA3_Q1    | GATA-3     | GATA3  | 0.27421    | 4 |
| V\$YY1_Q1      | YY1        | YY1    | 0.367346   | 4 |
| V\$E47_Q2      | E47        | TCF3   | 0.103691   | 3 |
| V\$E2A_Q6      | E2A        | TCF3   | 0.103691   | 3 |
| V\$GATA2_Q1    | GATA-2     | GATA2  | 0.531924   | 3 |
| V\$MYOD_Q6_01  | MyoD       | MYOD1  | 0.0114064  | 3 |
| V\$CRX_Q4_Q1   | CRX        | CRX    | 0.00887493 | 3 |
| V\$MYOD_Q1     | MyoD       | MYOD1  | 0.0114064  | 3 |
| V\$PITX1_Q1    | Pitx1      | PITX1  | 0.124336   | 3 |
| V\$E2A_Q2      | E2A        | TCF3   | 0.103691   | 3 |
| V\$PITX2_Q1    | PITX2      | PITX2  | 0.21196    | 3 |
| V\$E12_Q6      | E12        | TCF3   | 0.103691   | 3 |
| V\$YY1_Q2      | YY1        | YY1    | 0.367346   | 3 |

|                |          |         |            |   |
|----------------|----------|---------|------------|---|
| V\$GATA1_Q4    | GATA-1   | GATA1   | 0.121931   | 3 |
| V\$MYOGENIN_Q6 | myogenin | MYOG    | 0.0899556  | 3 |
| V\$PBX1_Q3     | Pbx1     | PBX1    | 0.565614   | 3 |
| V\$CRX_Q2      | Crx      | CRX     | 0.00887493 | 3 |
| V\$IRF7_Q3     | IRF-7    | IRF7    | 0.0635214  | 2 |
| V\$MYOD_Q6     | MyoD     | MYOD1   | 0.0114064  | 2 |
| V\$TCF3_Q1     | TCF-3    | TCF7L1  | 0.101706   | 2 |
| V\$HBP1_Q2     | hbp1     | HBP1    | 0.347048   | 2 |
| V\$IPF1_Q6     | IPF1     | PDX1    | 0.118723   | 2 |
| V\$TEF1_Q6_Q3  | TEF-1    | TEAD1   | 0.159093   | 2 |
| V\$TEF1_Q6     | TEF-1    | TEAD1   | 0.159093   | 2 |
| V\$CREM_Q6     | CREM     | CREM    | 0.0794977  | 2 |
| V\$E47_Q1      | E47      | TCF3    | 0.103691   | 2 |
| V\$IPF1_Q4_Q1  | IPF1     | PDX1    | 0.118723   | 2 |
| V\$ZABC1_Q1    | ZABC1    | ZNF217  | 0.217763   | 2 |
| V\$NANOG_Q1    | Nanog    | NANOG   | 0.154934   | 1 |
| V\$GR_Q1       | GR       | NR3C1   | 0.585482   | 1 |
| V\$HNF6_Q6     | HNF6     | ONECUT1 | 0.03058    | 1 |
| V\$E2F1_Q4     | E2F-1    | E2F1    | 0.0705747  | 1 |
| V\$ATF4_Q6     | ATF-4    | ATF4    | 0.0624708  | 1 |
| V\$ATF3_Q6_Q1  | ATF-3    | ATF3    | 0.16614    | 1 |
| V\$ATF2_Q5     | ATF-2    | ATF2    | 0.181426   | 1 |
| V\$ATF1_Q6_Q1  | ATF-1    | ATF1    | 0.291589   | 1 |
| V\$IPF1_Q4     | IPF1     | PDX1    | 0.118723   | 1 |
| V\$PITX1_Q6    | PITX1    | PITX1   | 0.124336   | 1 |
| V\$YY1_Q6_Q3   | YY1      | YY1     | 0.367346   | 1 |

hsa-mir-197

| Matrix_id    | transcription factor | Gene  | PCC       | Occurrence |
|--------------|----------------------|-------|-----------|------------|
| V\$PUR1_Q4   | PUR1                 | PURA  | 0.297783  | 78         |
| V\$ZIC3_Q1   | Zic3                 | ZIC3  | 0.109088  | 76         |
| V\$MAFB_Q1   | MAFB                 | MAFB  | 0.129848  | 76         |
| V\$CETS1_Q6  | C-ets-1              | ETS1  | 0.0391643 | 72         |
| V\$PARP_Q4   | PARP                 | PARP1 | 0.303089  | 70         |
| V\$AP4_Q6_Q2 | AP-4                 | TFAP4 | 0.344389  | 60         |
| V\$TBP_Q6    | TBP                  | TBP   | 0.0196647 | 60         |
| V\$SOX9_Q4   | SOX9                 | SOX9  | 0.205447  | 56         |
| V\$YY1_Q6_Q2 | YY1                  | YY1   | 0.0151553 | 53         |
| V\$YY1_Q1    | YY1                  | YY1   | 0.0151553 | 52         |
| V\$SOX9_Q1   | SOX9                 | SOX9  | 0.205447  | 49         |
| V\$MEF2C_Q4  | MEF-2C               | MEF2C | 0.583536  | 47         |
| V\$GATA1_Q2  | GATA-1               | GATA1 | 0.183713  | 46         |

|              |        |         |            |    |
|--------------|--------|---------|------------|----|
| V\$AP4_Q5    | AP-4   | TFAP4   | 0.344389   | 44 |
| V\$SRY_Q2    | SRY    | SRY     | 0.119642   | 43 |
| V\$GATA6_Q1  | GATA-6 | GATA6   | 0.330473   | 41 |
| V\$GATA1_Q6  | GATA-1 | GATA1   | 0.183713   | 41 |
| V\$GATA1_Q5  | GATA-1 | GATA1   | 0.183713   | 41 |
| V\$PITX3_Q2  | PITX3  | PITX3   | 0.0936476  | 41 |
| V\$PARP_Q3   | PARP   | PARP1   | 0.303089   | 40 |
| V\$PBX1_Q3   | Pbx1   | PBX1    | 0.221783   | 38 |
| V\$AP4_Q6    | AP-4   | TFAP4   | 0.344389   | 37 |
| V\$GATA1_Q4  | GATA-1 | GATA1   | 0.183713   | 36 |
| V\$YY1_Q6_Q3 | YY1    | YY1     | 0.0151553  | 35 |
| V\$FOXJ2_Q1  | FOXJ2  | FOXJ2   | 0.0508024  | 34 |
| V\$IRF8_Q6   | IRF-8  | IRF8    | 0.00159862 | 34 |
| V\$PBX1_Q4   | Pbx1   | PBX1    | 0.221783   | 33 |
| V\$SOX10_Q6  | SOX10  | SOX10   | 0.621824   | 31 |
| V\$DAX1_Q1   | Dax1   | NR0B1   | 0.00164919 | 26 |
| V\$NKX2B_Q3  | NKX2B  | NKX2-2  | 0.645494   | 25 |
| V\$DBP_Q6_Q1 | DBP    | DBP     | 0.234283   | 22 |
| V\$PIT1_Q6   | Pit-1  | POU1F1  | 0.197699   | 22 |
| V\$LHX3b_Q1  | LHX3b  | LHX3    | 0.121585   | 22 |
| V\$OC2_Q3    | OC-2   | ONECUT2 | 0.0982846  | 21 |
| V\$AP4_Q6_Q1 | AP-4   | TFAP4   | 0.344389   | 20 |
| V\$HOX13_Q2  | HOXA5  | HOXA5   | 0.146798   | 19 |
| V\$MSX1_Q1   | Msx-1  | MSX1    | 0.0554121  | 18 |
| V\$CIZ_Q1    | CIZ    | ZNF384  | 0.0147559  | 15 |
| V\$NCX_Q2    | Ncx    | TLX2    | 0.0391919  | 13 |
| V\$LHX3_Q1   | Lhx3   | LHX3    | 0.121585   | 13 |
| V\$SOX2_Q6   | SOX2   | SOX2    | 0.223161   | 11 |
| V\$HSF1_Q1   | HSF1   | HSF1    | 0.257652   | 11 |
| V\$AMEF2_Q6  | aMEF-2 | MEF2A   | 0.493254   | 9  |
| V\$RSRFC4_Q2 | RSRFC4 | MEF2A   | 0.493254   | 4  |
| V\$RSRFC4_Q1 | RSRFC4 | MEF2A   | 0.493254   | 3  |

hsa-mir-198

| Matrix_id  | transcription factor | Gene  | PCC       | Occurrence |
|------------|----------------------|-------|-----------|------------|
| V\$PUR1_Q4 | PUR1                 | PURA  | 0.265489  | 238        |
| V\$PEA3_Q6 | PEA3                 | ETV4  | 0.0643855 | 232        |
| V\$PARP_Q4 | PARP                 | PARP1 | 0.0547425 | 229        |
| V\$ELF1_Q6 | Elf-1                | ELF1  | 0.229875  | 227        |
| V\$GKLF_Q4 | GKLF                 | KLF4  | 0.56518   | 224        |
| V\$P300_Q1 | p300                 | EP300 | 0.325138  | 212        |
| V\$ETS1_B  | c-Ets-1              | ETS1  | 0.100946  | 208        |



|                |            |        |            |     |
|----------------|------------|--------|------------|-----|
| V\$CETS1_Q6    | C-ets-1    | ETS1   | 0.100946   | 203 |
| V\$SMAD4_Q6_01 | Smad4      | SMAD4  | 0.321669   | 201 |
| V\$GABPA_Q4    | GABP-alpha | GABPA  | 0.299109   | 193 |
| V\$GATA1_01    | GATA-1     | GATA1  | 0.0663318  | 191 |
| V\$TBP_Q6      | TBP        | TBP    | 0.123495   | 181 |
| V\$GR_Q6       | GR         | NR3C1  | 0.217691   | 180 |
| V\$YY1_01      | YY1        | YY1    | 0.419283   | 179 |
| V\$DLX5_01     | dlx5       | DLX5   | 0.616471   | 165 |
| V\$YY1_Q6      | YY1        | YY1    | 0.419283   | 162 |
| V\$YY1_Q6_02   | YY1        | YY1    | 0.419283   | 162 |
| V\$GATA1_02    | GATA-1     | GATA1  | 0.0663318  | 155 |
| V\$GATA2_02    | GATA-2     | GATA2  | 0.766715   | 152 |
| V\$GATA1_06    | GATA-1     | GATA1  | 0.0663318  | 152 |
| V\$GATA1_05    | GATA-1     | GATA1  | 0.0663318  | 152 |
| V\$ERBETA_Q5   | ER-beta    | ESR2   | 0.0165203  | 144 |
| V\$SP1_Q6      | Sp1        | SP1    | 0.318989   | 140 |
| V\$HMGIIY_01   | HMGIIY     | HMGA1  | 0.294196   | 132 |
| V\$GATA1_04    | GATA-1     | GATA1  | 0.0663318  | 130 |
| V\$FOXO3A_Q1   | FOXO3A     | FOXO3  | 0.00638242 | 125 |
| V\$GATA3_01    | GATA-3     | GATA3  | 0.923777   | 121 |
| V\$YY1_Q6_03   | YY1        | YY1    | 0.419283   | 120 |
| V\$GR_01       | GR         | NR3C1  | 0.217691   | 110 |
| V\$CEBPE_Q6    | CEBPE      | CEBPE  | 0.0279454  | 109 |
| V\$GATA2_01    | GATA-2     | GATA2  | 0.766715   | 108 |
| V\$PITX2_Q2    | Pitx2      | PITX2  | 0.424653   | 95  |
| V\$FOXJ2_01    | FOXJ2      | FOXJ2  | 0.0148145  | 94  |
| V\$PITX2_01    | PITX2      | PITX2  | 0.424653   | 92  |
| V\$GATA3_03    | GATA-3     | GATA3  | 0.923777   | 84  |
| V\$FAC1_01     | FAC1       | BPTF   | 0.0618355  | 82  |
| V\$HBP1_Q2     | hbp1       | HBP1   | 0.626253   | 82  |
| V\$CEBPG_Q6_01 | C/EBPgamma | CEBPG  | 0.548857   | 76  |
| V\$HOXA9_01    | hoxa9      | HOXA9  | 0.022072   | 75  |
| V\$FOXO4_02    | FOXO4      | FOXO4  | 0.916441   | 65  |
| V\$CEBPB_Q6    | C/EBPbeta  | CEBPB  | 0.56084    | 65  |
| V\$ERR3_Q2     | ERR3       | ESRRG  | 0.456983   | 34  |
| V\$RORA1_01    | RORalpha1  | RORA   | 0.0240026  | 21  |
| V\$NKX3A_02    | Nkx3A      | NKX3-1 | 0.113294   | 17  |

hsa-mir-199a-1

| Matrix_id  | transcription factor | Gene   | PCC       | Occurrence |
|------------|----------------------|--------|-----------|------------|
| V\$SP1_01  | Sp1                  | SP1    | 0.0288378 | 2          |
| V\$TCF4_Q5 | TCF-4                | TCF7L2 | 0.337215  | 2          |

|                |            |        |           |   |
|----------------|------------|--------|-----------|---|
| V\$SMAD4_Q6_01 | Smad4      | SMAD4  | 0.0512127 | 2 |
| V\$ESE1_Q3     | ESE-1      | ELF3   | 0.10927   | 2 |
| V\$YY1_Q6      | YY1        | YY1    | 0.0233436 | 2 |
| V\$SP1_Q6_01   | Sp1        | SP1    | 0.0288378 | 2 |
| V\$SP1_Q4_01   | Sp1        | SP1    | 0.0288378 | 2 |
| V\$SP1_Q2_01   | Sp1        | SP1    | 0.0288378 | 2 |
| V\$YY1_Q6_02   | YY1        | YY1    | 0.0233436 | 2 |
| V\$DLX5_01     | dlx5       | DLX5   | 0.60436   | 2 |
| V\$GKLF_Q4     | GKLF       | KLF4   | 0.376316  | 2 |
| V\$SP1_02      | SP1        | SP1    | 0.0288378 | 2 |
| V\$YY1_01      | YY1        | YY1    | 0.0233436 | 2 |
| V\$ESE1_02     | ESE-1      | ELF3   | 0.10927   | 2 |
| V\$CEBPB_02    | C/EBPbeta  | CEBPB  | 0.223123  | 2 |
| V\$SP1_Q6      | Sp1        | SP1    | 0.0288378 | 2 |
| V\$WT1_Q6_01   | WT1        | WT1    | 0.154799  | 1 |
| V\$ZABC1_01    | ZABC1      | ZNF217 | 0.598131  | 1 |
| V\$ERM_02      | Erm        | ETV5   | 0.404524  | 1 |
| V\$STAT3_03    | STAT3      | STAT3  | 0.0148945 | 1 |
| V\$FKLF_Q5     | FKLF       | KLF11  | 0.171588  | 1 |
| V\$GABPA_Q4    | GABP-alpha | GABPA  | 0.0112698 | 1 |
| V\$ERG_03      | ERG        | ERG    | 0.0493006 | 1 |
| V\$GABPBETA_Q3 | GABP-beta  | GABPB1 | 0.157046  | 1 |
| V\$ERG_01      | ERG        | ERG    | 0.0493006 | 1 |
| V\$HIF1A_Q6    | HIF-1alpha | HIF1A  | 0.276095  | 1 |
| V\$AP2ALPHA_Q6 | AP-2alpha  | TFAP2A | 0.601689  | 1 |
| V\$AHR_Q5      | AhR        | AHR    | 0.593301  | 1 |
| V\$YY1_02      | YY1        | YY1    | 0.0233436 | 1 |
| V\$CP2_01      | CP2        | TFCP2  | 0.263141  | 1 |
| V\$ARNT_01     | Arnt       | ARNT   | 0.057921  | 1 |
| V\$MEIS1_01    | MEIS1      | MEIS1  | 0.20358   | 1 |
| V\$AP2ALPHA_01 | AP-2alpha  | TFAP2A | 0.601689  | 1 |
| V\$AP2GAMMA_01 | AP-2gamma  | TFAP2C | 0.515526  | 1 |
| V\$FOXO4_02    | FOXO4      | FOXO4  | 0.628296  | 1 |
| V\$PITX2_Q2    | Pitx2      | PITX2  | 0.165026  | 1 |
| V\$PEA3_Q6     | PEA3       | ETV4   | 0.0972482 | 1 |
| V\$SMAD4_Q6    | SMAD4      | SMAD4  | 0.0512127 | 1 |
| V\$PR_01       | PR         | PGR    | 0.0443029 | 1 |
| V\$WT1_Q6      | WT1        | WT1    | 0.154799  | 1 |
| V\$CMYC_02     | c-Myc      | MYC    | 0.377521  | 1 |
| V\$RNF96_01    | RNF96      | TRIM28 | 0.109688  | 1 |
| V\$P300_01     | p300       | EP300  | 0.02017   | 1 |

---

hsa-mir-199a-2

---

| Matrix_id      | transcription factor | Gene    | PCC       | Occurrence |
|----------------|----------------------|---------|-----------|------------|
| V\$SP1_01      | Sp1                  | SP1     | 0.0288378 | 2          |
| V\$YY1_Q6      | YY1                  | YY1     | 0.0233436 | 2          |
| V\$TBP_Q6      | TBP                  | TBP     | 0.115171  | 2          |
| V\$YY1_Q6_02   | YY1                  | YY1     | 0.0233436 | 2          |
| V\$DLX5_01     | dlx5                 | DLX5    | 0.60436   | 2          |
| V\$HOX13_02    | HOXA5                | HOXA5   | 0.182462  | 2          |
| V\$HBP1_Q2     | hbp1                 | HBP1    | 0.470124  | 2          |
| V\$GKLF_Q4     | GKLF                 | KLF4    | 0.376316  | 2          |
| V\$SMAD4_Q6_01 | Smad4                | SMAD4   | 0.0512127 | 2          |
| V\$HNF6_Q6     | HNF6                 | ONECUT1 | 0.0228649 | 2          |
| V\$CEBPG_Q6    | C/EBPgamma           | CEBPG   | 0.233682  | 2          |
| V\$YY1_01      | YY1                  | YY1     | 0.0233436 | 2          |
| V\$GATA3_01    | GATA-3               | GATA3   | 0.575135  | 2          |
| V\$GATA2_02    | GATA-2               | GATA2   | 0.35789   | 2          |
| V\$GATA3_02    | GATA-3               | GATA3   | 0.575135  | 2          |
| V\$GATA3_03    | GATA-3               | GATA3   | 0.575135  | 2          |
| V\$GATA6_01    | GATA-6               | GATA6   | 0.150895  | 2          |
| V\$NURR1_Q3    | NURR1                | NR4A2   | 0.0398462 | 1          |
| V\$E4BP4_01    | E4BP4                | NFIL3   | 0.190009  | 1          |
| V\$GABPBETA_Q3 | GABP-beta            | GABPB1  | 0.157046  | 1          |
| V\$CEBPG_Q6_01 | C/EBPgamma           | CEBPG   | 0.233682  | 1          |
| V\$PEA3_Q6     | PEA3                 | ETV4    | 0.0972482 | 1          |
| V\$FOXO4_02    | FOXO4                | FOXO4   | 0.628296  | 1          |
| V\$GABPA_Q4    | GABP-alpha           | GABPA   | 0.0112698 | 1          |
| V\$PBX1_Q3     | Pbx1                 | PBX1    | 0.105705  | 1          |

hsa-mir-199b

| Matrix_id      | transcription factor | Gene   | PCC       | Occurrence |
|----------------|----------------------|--------|-----------|------------|
| V\$SOX9_Q4     | SOX9                 | SOX9   | 0.106406  | 19         |
| V\$PUR1_Q4     | PUR1                 | PURA   | 0.155025  | 19         |
| V\$SMAD4_Q6_01 | Smad4                | SMAD4  | 0.248241  | 17         |
| V\$TBP_Q6      | TBP                  | TBP    | 0.0170777 | 17         |
| V\$PEA3_Q6     | PEA3                 | ETV4   | 0.145903  | 17         |
| V\$YY1_01      | YY1                  | YY1    | 0.359415  | 16         |
| V\$ELF1_Q6     | Elf-1                | ELF1   | 0.331698  | 16         |
| V\$GR_Q6       | GR                   | NR3C1  | 0.166492  | 15         |
| V\$DLX5_01     | dlx5                 | DLX5   | 0.482213  | 15         |
| V\$NFAT4_Q3    | NF-AT4               | NFATC3 | 0.0446252 | 15         |
| V\$AML1_Q6     | AML1                 | RUNX1  | 0.0478708 | 14         |
| V\$GATA2_02    | GATA-2               | GATA2  | 0.632944  | 14         |

|                |            |        |           |    |
|----------------|------------|--------|-----------|----|
| V\$GATA3_Q2    | GATA-3     | GATA3  | 0.746675  | 12 |
| V\$YY1_Q6      | YY1        | YY1    | 0.359415  | 12 |
| V\$YY1_Q6_Q3   | YY1        | YY1    | 0.359415  | 12 |
| V\$HMGY1_Q1    | HMGY1      | HMGY1  | 0.338787  | 11 |
| V\$HBP1_Q2     | hbp1       | HBP1   | 0.574933  | 11 |
| V\$ATF1_Q6_Q1  | ATF-1      | ATF1   | 0.108842  | 11 |
| V\$YY1_Q6_Q2   | YY1        | YY1    | 0.359415  | 11 |
| V\$SOX9_B1     | SOX9       | SOX9   | 0.106406  | 11 |
| V\$CREM_Q6     | CREM       | CREM   | 0.0812939 | 11 |
| V\$GR_Q1       | GR         | NR3C1  | 0.166492  | 10 |
| V\$FOXO4_Q2    | FOXO4      | FOXO4  | 0.73271   | 10 |
| V\$ATF3_Q6_Q1  | ATF-3      | ATF3   | 0.588162  | 9  |
| V\$PITX2_Q2    | Pitx2      | PITX2  | 0.329312  | 9  |
| V\$CEBPG_Q6_Q1 | C/EBPgamma | CEBPG  | 0.461827  | 8  |
| V\$GATA3_Q1    | GATA-3     | GATA3  | 0.746675  | 8  |
| V\$TCF4_Q1     | TCF-4      | TCF7L2 | 0.566643  | 8  |
| V\$GATA2_Q1    | GATA-2     | GATA2  | 0.632944  | 8  |
| V\$TCF4_Q5     | TCF-4      | TCF7L2 | 0.566643  | 8  |
| V\$IRF7_Q3     | IRF-7      | IRF7   | 0.162963  | 7  |
| V\$PITX2_Q1    | PITX2      | PITX2  | 0.329312  | 7  |
| V\$AML1_Q1     | AML1a      | RUNX1  | 0.0478708 | 6  |
| V\$IRF1_Q6_Q1  | IRF-1      | IRF1   | 0.282213  | 4  |
| V\$CDP_Q4      | CDP        | CUX1   | 0.431369  | 3  |
| V\$ERR3_Q2     | ERR3       | ESRRG  | 0.196915  | 2  |

hsa-mir-200a

| Matrix_id         | transcription factor | Gene  | PCC       | Occurrence |
|-------------------|----------------------|-------|-----------|------------|
| V\$ELF1_Q6        | Elf-1                | ELF1  | 0.323229  | 3          |
| V\$AP4_Q6_Q2      | AP-4                 | TFAP4 | 0.095509  | 3          |
| V\$HNF4A_Q6_Q1    | HNF-4alpha           | HNF4A | 0.0804495 | 3          |
| V\$SOX9_B1        | SOX9                 | SOX9  | 0.268761  | 3          |
| V\$SOX9_Q4        | SOX9                 | SOX9  | 0.268761  | 3          |
| V\$STAT3_Q3       | STAT3                | STAT3 | 0.205146  | 2          |
| V\$Elf5_Q3        | ELF5                 | ELF5  | 0.360785  | 2          |
| V\$AP4_Q6_Q1      | AP-4                 | TFAP4 | 0.095509  | 2          |
| V\$MYOGENIN_Q6_Q1 | myogenin             | MYOG  | 0.0447721 | 2          |
| V\$MYOGENIN_Q6    | myogenin             | MYOG  | 0.0447721 | 2          |
| V\$ZIC3_Q1        | Zic3                 | ZIC3  | 0.122719  | 2          |
| V\$VDR_Q3         | VDR                  | VDR   | 0.0421708 | 2          |
| V\$AP4_Q6         | AP-4                 | TFAP4 | 0.095509  | 2          |
| V\$AP4_Q5         | AP-4                 | TFAP4 | 0.095509  | 2          |
| V\$EGR1_Q2        | EGR-1                | EGR1  | 0.428292  | 1          |

|               |       |       |            |   |
|---------------|-------|-------|------------|---|
| V\$ATF3_Q6_01 | ATF-3 | ATF3  | 0.256995   | 1 |
| V\$KLF15_Q2   | KLF15 | KLF15 | 0.172011   | 1 |
| V\$HOXA7_01   | HOXA7 | HOXA7 | 0.00626069 | 1 |
| V\$AP4_01     | AP-4  | TFAP4 | 0.095509   | 1 |

hsa-mir-200b

| Matrix_id         | transcription factor | Gene   | PCC        | Occurrence |
|-------------------|----------------------|--------|------------|------------|
| V\$TCF3_01        | TCF-3                | TCF7L1 | 0.050646   | 7          |
| V\$SOX9_Q4        | SOX9                 | SOX9   | 0.47023    | 7          |
| V\$PUR1_Q4        | PUR1                 | PURA   | 0.160423   | 7          |
| V\$GKLF_Q4        | GKLF                 | KLF4   | 0.221354   | 7          |
| V\$AP4_Q6_02      | AP-4                 | TFAP4  | 0.178565   | 7          |
| V\$AML1_Q6        | AML1                 | RUNX1  | 0.00442887 | 7          |
| V\$ELF1_Q6        | Elf-1                | ELF1   | 0.613365   | 7          |
| V\$AP4_Q5         | AP-4                 | TFAP4  | 0.178565   | 7          |
| V\$MYOGENIN_Q6    | myogenin             | MYOG   | 0.0201815  | 6          |
| V\$HNF4A_Q6_01    | HNF-4alpha           | HNF4A  | 0.00160818 | 6          |
| V\$SMAD3_Q6_01    | Smad3                | SMAD3  | 0.0790932  | 6          |
| V\$GR_Q6          | GR                   | NR3C1  | 0.117797   | 6          |
| V\$AP4_Q6         | AP-4                 | TFAP4  | 0.178565   | 6          |
| V\$Elf5_03        | ELF5                 | ELF5   | 0.671401   | 6          |
| V\$MYOGENIN_Q6_01 | myogenin             | MYOG   | 0.0201815  | 5          |
| V\$YY1_Q6         | YY1                  | YY1    | 0.0880359  | 5          |
| V\$HIF1A_Q6       | HIF-1alpha           | HIF1A  | 0.0695415  | 5          |
| V\$SOX9_B1        | SOX9                 | SOX9   | 0.47023    | 5          |
| V\$TFII_Q6        | TFII-I               | GTF2I  | 0.0250323  | 5          |
| V\$PBX1_Q3        | Pbx1                 | PBX1   | 0.107605   | 4          |
| V\$ZABC1_01       | ZABC1                | ZNF217 | 0.0687805  | 4          |
| V\$AML2_Q3_01     | AML2                 | RUNX3  | 0.0832866  | 4          |
| V\$AML2_Q3        | AML2                 | RUNX3  | 0.0832866  | 4          |
| V\$AP4_Q6_01      | AP-4                 | TFAP4  | 0.178565   | 3          |
| V\$HNF3A_01       | HNF3A                | FOXA1  | 0.318366   | 3          |
| V\$EGR1_02        | EGR-1                | EGR1   | 0.518484   | 3          |
| V\$STAT3_03       | STAT3                | STAT3  | 0.25257    | 3          |
| V\$ATF3_Q6_01     | ATF-3                | ATF3   | 0.332212   | 2          |
| V\$ATF1_Q6_01     | ATF-1                | ATF1   | 0.107667   | 2          |
| V\$KLF15_Q2       | KLF15                | KLF15  | 0.255104   | 2          |
| V\$AP4_01         | AP-4                 | TFAP4  | 0.178565   | 2          |
| V\$E2F4_Q6        | E2F-4                | E2F4   | 0.0477645  | 1          |

hsa-mir-200c

| Matrix_id      | transcription factor | Gene   | PCC        | Occurrence |
|----------------|----------------------|--------|------------|------------|
| V\$PUR1_Q4     | PUR1                 | PURA   | 0.194482   | 32         |
| V\$SOX9_Q4     | SOX9                 | SOX9   | 0.147116   | 31         |
| V\$GKLF_Q4     | GKLF                 | KLF4   | 0.77484    | 31         |
| V\$PEA3_Q6     | PEA3                 | ETV4   | 0.0686406  | 30         |
| V\$MAFB_01     | MAFB                 | MAFB   | 0.346045   | 29         |
| V\$P300_01     | p300                 | EP300  | 0.238027   | 29         |
| V\$GR_Q6       | GR                   | NR3C1  | 0.160291   | 25         |
| V\$DLX5_01     | dlx5                 | DLX5   | 0.476448   | 25         |
| V\$YY1_01      | YY1                  | YY1    | 0.38971    | 25         |
| V\$SMAD4_Q6_01 | Smad4                | SMAD4  | 0.221659   | 25         |
| V\$TTF1_Q5     | TTF-1                | NKX2-1 | 0.0776565  | 24         |
| V\$SMAD3_Q6_01 | Smad3                | SMAD3  | 0.00368811 | 23         |
| V\$SOX9_B1     | SOX9                 | SOX9   | 0.147116   | 23         |
| V\$AML1_Q6     | AML1                 | RUNX1  | 0.0405414  | 21         |
| V\$AHR_Q5      | AhR                  | AHR    | 0.838178   | 19         |
| V\$SP1_Q6      | Sp1                  | SP1    | 0.118064   | 19         |
| V\$ARNT_01     | Arnt                 | ARNT   | 0.125648   | 19         |
| V\$SP1_Q6_01   | Sp1                  | SP1    | 0.118064   | 18         |
| V\$SP1_01      | Sp1                  | SP1    | 0.118064   | 18         |
| V\$SP1_Q4_01   | Sp1                  | SP1    | 0.118064   | 18         |
| V\$FOXJ2_01    | FOXJ2                | FOXJ2  | 0.0284769  | 18         |
| V\$SP1_Q2_01   | Sp1                  | SP1    | 0.118064   | 17         |
| V\$TCF4_01     | TCF-4                | TCF7L2 | 0.642702   | 16         |
| V\$AP4_Q6_02   | AP-4                 | TFAP4  | 0.00305426 | 16         |
| V\$AP2ALPHA_Q6 | AP-2alpha            | TFAP2A | 0.727961   | 16         |
| V\$CEBPD_Q6    | C/EBPdelta           | CEBPD  | 0.486869   | 16         |
| V\$PITX2_Q2    | Pitx2                | PITX2  | 0.278717   | 15         |
| V\$AP2ALPHA_01 | AP-2alpha            | TFAP2A | 0.727961   | 14         |
| V\$AML1_01     | AML1a                | RUNX1  | 0.0405414  | 14         |
| V\$GR_01       | GR                   | NR3C1  | 0.160291   | 14         |
| V\$TCF4_Q5     | TCF-4                | TCF7L2 | 0.642702   | 14         |
| V\$FKLF_Q5     | FKLF                 | KLF11  | 0.129642   | 13         |
| V\$CEBPB_Q6    | C/EBPbeta            | CEBPB  | 0.446757   | 13         |
| V\$PITX2_01    | PITX2                | PITX2  | 0.278717   | 13         |
| V\$SREBP1_Q6   | SREBP-1              | SREBF1 | 0.00619386 | 13         |
| V\$AP4_Q5      | AP-4                 | TFAP4  | 0.00305426 | 12         |
| V\$SMAD3_Q6    | SMAD3                | SMAD3  | 0.00368811 | 12         |
| V\$AP2GAMMA_01 | AP-2gamma            | TFAP2C | 0.733551   | 12         |
| V\$AML1_Q4     | AML1                 | RUNX1  | 0.0405414  | 12         |
| V\$EGR1_Q2     | EGR-1                | EGR1   | 0.0590773  | 11         |
| V\$NURR1_Q3    | NURR1                | NR4A2  | 0.015698   | 11         |
| V\$ELF5_01     | ELF5                 | ELF5   | 0.262205   | 9          |

|             |       |        |           |   |
|-------------|-------|--------|-----------|---|
| V\$RNF96_01 | RNF96 | TRIM28 | 0.189718  | 9 |
| V\$CNOT3_01 | CNOT3 | CNOT3  | 0.0279016 | 9 |
| V\$STAT1_05 | STAT1 | STAT1  | 0.243167  | 7 |
| V\$EGR2_01  | Egr-2 | EGR2   | 0.156615  | 6 |
| V\$GRE_C    | GR    | NR3C1  | 0.160291  | 5 |
| V\$SMAD4_Q6 | SMAD4 | SMAD4  | 0.221659  | 4 |
| V\$EGR1_01  | Egr-1 | EGR1   | 0.0590773 | 4 |
| V\$XBP1_01  | XBP-1 | XBP1   | 0.573719  | 3 |
| V\$BACH1_01 | Bach1 | BACH1  | 0.0419683 | 2 |

hsa-mir-202

| Matrix_id      | transcription factor | Gene   | PCC        | Occurrence |
|----------------|----------------------|--------|------------|------------|
| V\$AP2REP_01   | AP-2rep              | KLF12  | 0.1073     | 298        |
| V\$GKLF_Q4     | GKLF                 | KLF4   | 0.105036   | 295        |
| V\$PEA3_Q6     | PEA3                 | ETV4   | 0.120687   | 291        |
| V\$PARP_Q4     | PARP                 | PARP1  | 0.176953   | 291        |
| V\$ZIC3_01     | Zic3                 | ZIC3   | 0.313953   | 264        |
| V\$TBP_Q6      | TBP                  | TBP    | 0.784523   | 262        |
| V\$SOX9_Q4     | SOX9                 | SOX9   | 0.606214   | 254        |
| V\$NFAT4_Q3    | NF-AT4               | NFATC3 | 0.0431241  | 251        |
| V\$GATA1_01    | GATA-1               | GATA1  | 0.080529   | 250        |
| V\$CETS1_Q6    | C-ets-1              | ETS1   | 0.0746848  | 247        |
| V\$ETS1_B      | c-Ets-1              | ETS1   | 0.0746848  | 243        |
| V\$GABPA_Q4    | GABP-alpha           | GABPA  | 0.00464486 | 239        |
| V\$DLX5_01     | dlx5                 | DLX5   | 0.312612   | 233        |
| V\$HNF4A_Q6_01 | HNF-4alpha           | HNF4A  | 0.0407157  | 233        |
| V\$SOX5_01     | SOX5                 | SOX5   | 0.582474   | 222        |
| V\$YY1_Q6      | YY1                  | YY1    | 0.138611   | 221        |
| V\$AML1_Q6     | AML1                 | RUNX1  | 0.143848   | 221        |
| V\$SOX9_B1     | SOX9                 | SOX9   | 0.606214   | 221        |
| V\$YY1_Q6_02   | YY1                  | YY1    | 0.138611   | 212        |
| V\$GATA6_01    | GATA-6               | GATA6  | 0.105333   | 205        |
| V\$GATA1_05    | GATA-1               | GATA1  | 0.080529   | 205        |
| V\$GATA1_06    | GATA-1               | GATA1  | 0.080529   | 205        |
| V\$PITX3_Q2    | PITX3                | PITX3  | 0.135303   | 196        |
| V\$SRY_02      | SRY                  | SRY    | 0.0733843  | 194        |
| V\$ERBETA_Q5   | ER-beta              | ESR2   | 0.238874   | 191        |
| V\$E2A_Q6      | E2A                  | TCF3   | 0.370986   | 191        |
| V\$E47_02      | E47                  | TCF3   | 0.370986   | 191        |
| V\$E12_Q6      | E12                  | TCF3   | 0.370986   | 191        |
| V\$ING4_01     | ING4                 | ING4   | 0.0491314  | 181        |
| V\$HMG1Y_01    | HMG1Y                | HMGA1  | 0.569455   | 181        |

|               |            |         |            |     |
|---------------|------------|---------|------------|-----|
| V\$ELK1_Q2    | Elk-1      | ELK1    | 0.301088   | 177 |
| V\$HNF3B_Q6   | HNF-3beta  | FOXA2   | 0.00766143 | 174 |
| V\$ELK1_Q6    | ELK-1      | ELK1    | 0.301088   | 167 |
| V\$HIF1A_Q6   | HIF-1alpha | HIF1A   | 0.205907   | 161 |
| V\$TEF1_Q6_Q3 | TEF-1      | TEAD1   | 0.0195563  | 138 |
| V\$FOXP3_Q1   | FOXP3      | FOXP3   | 0.0255528  | 134 |
| V\$OC2_Q3     | OC-2       | ONECUT2 | 0.0339969  | 131 |
| V\$TCF4_Q1    | TCF-4      | TCF7L2  | 0.0217157  | 128 |
| V\$TEF1_Q6    | TEF-1      | TEAD1   | 0.0195563  | 127 |
| V\$E47_Q1     | E47        | TCF3    | 0.370986   | 107 |
| V\$PDEF_Q2    | PDEF       | SPDEF   | 0.0132132  | 103 |
| V\$LHX3b_Q1   | LHX3b      | LHX3    | 0.148512   | 95  |
| V\$TR4_Q2     | TR4        | NR2C2   | 0.0943894  | 76  |
| V\$HOX13_Q2   | HOXA5      | HOXA5   | 0.0861647  | 72  |
| V\$YY1_Q3     | YY1        | YY1     | 0.138611   | 65  |
| V\$P53_Q2     | p53        | TP53    | 0.0902022  | 65  |
| V\$HOXB8_Q1   | HOXB8      | HOXB8   | 0.252883   | 60  |
| V\$LHX3_Q1    | Lhx3       | LHX3    | 0.148512   | 51  |
| V\$FOXJ2_Q2   | FOXJ2      | FOXJ2   | 0.302479   | 46  |

hsa-mir-203a

| Matrix_id      | transcription factor | Gene   | PCC       | Occurrence |
|----------------|----------------------|--------|-----------|------------|
| V\$PUR1_Q4     | PUR1                 | PURA   | 0.0755609 | 17         |
| V\$MAFB_Q1     | MAFB                 | MAFB   | 0.467928  | 16         |
| V\$GKLF_Q4     | GKLF                 | KLF4   | 0.83526   | 16         |
| V\$ELF1_Q6     | Elf-1                | ELF1   | 0.480762  | 15         |
| V\$ZABC1_Q1    | ZABC1                | ZNF217 | 0.716748  | 15         |
| V\$GR_Q6       | GR                   | NR3C1  | 0.0675384 | 15         |
| V\$SOX9_Q4     | SOX9                 | SOX9   | 0.0004717 | 14         |
| V\$NFAT4_Q3    | NF-AT4               | NFATC3 | 0.021815  | 13         |
| V\$AML1_Q6     | AML1                 | RUNX1  | 0.0678752 | 13         |
| V\$ETS2_Q6     | c-Ets-2              | ETS2   | 0.140909  | 13         |
| V\$SMAD4_Q6_Q1 | Smad4                | SMAD4  | 0.0976744 | 12         |
| V\$YY1_Q6      | YY1                  | YY1    | 0.324002  | 12         |
| V\$Elf5_Q3     | ELF5                 | ELF5   | 0.223713  | 12         |
| V\$YY1_Q6_Q2   | YY1                  | YY1    | 0.324002  | 11         |
| V\$TCF4_Q1     | TCF-4                | TCF7L2 | 0.630403  | 11         |
| V\$SPI1_Q3     | SPI1                 | SPI1   | 0.179009  | 11         |
| V\$AHR_Q5      | AhR                  | AHR    | 0.771744  | 10         |
| V\$AP2GAMMA_Q1 | AP-2gamma            | TFAP2C | 0.65752   | 10         |
| V\$LEF1_Q5     | LEF-1                | LEF1   | 0.0116866 | 10         |
| V\$AP2ALPHA_Q1 | AP-2alpha            | TFAP2A | 0.640327  | 10         |



|                |           |        |           |   |
|----------------|-----------|--------|-----------|---|
| V\$EHF_03      | EHF       | EHF    | 0.344943  | 9 |
| V\$ESE1_Q3     | ESE-1     | ELF3   | 0.50205   | 9 |
| V\$SP1_01      | Sp1       | SP1    | 0.0370407 | 9 |
| V\$TFII_Q6     | TFII-I    | GTF2I  | 0.0415275 | 8 |
| V\$PDEF_02     | PDEF      | SPDEF  | 0.0520324 | 8 |
| V\$SP2_01      | SP2       | SP2    | 0.100923  | 8 |
| V\$ESE1_02     | ESE-1     | ELF3   | 0.50205   | 8 |
| V\$AP2ALPHA_Q6 | AP-2alpha | TFAP2A | 0.640327  | 8 |
| V\$SP1_Q6      | Sp1       | SP1    | 0.0370407 | 8 |
| V\$GR_01       | GR        | NR3C1  | 0.0675384 | 7 |
| V\$TCF4_Q5     | TCF-4     | TCF7L2 | 0.630403  | 7 |
| V\$FKLF_Q5     | FKLF      | KLF11  | 0.117459  | 7 |
| V\$SP1_Q6_01   | Sp1       | SP1    | 0.0370407 | 7 |
| V\$ERM_02      | Erm       | ETV5   | 0.370636  | 7 |
| V\$SP1_02      | SP1       | SP1    | 0.0370407 | 7 |
| V\$SP1_Q2_01   | Sp1       | SP1    | 0.0370407 | 7 |
| V\$SP1_Q4_01   | Sp1       | SP1    | 0.0370407 | 7 |
| V\$SREBP1_Q6   | SREBP-1   | SREBF1 | 0.0426744 | 7 |
| V\$KLF15_Q2    | KLF15     | KLF15  | 0.0168419 | 6 |
| V\$YY1_02      | YY1       | YY1    | 0.324002  | 6 |
| V\$ERG_03      | ERG       | ERG    | 0.0629793 | 6 |
| V\$EGR1_02     | EGR-1     | EGR1   | 0.0283619 | 6 |
| V\$RNF96_01    | RNF96     | TRIM28 | 0.177602  | 5 |
| V\$CP2_01      | CP2       | TFCP2  | 0.459927  | 4 |
| V\$EGR2_01     | Egr-2     | EGR2   | 0.254328  | 4 |
| V\$IRF7_Q3     | IRF-7     | IRF7   | 0.264988  | 4 |
| V\$AML2_Q3     | AML2      | RUNX3  | 0.0401921 | 4 |
| V\$STAT3_03    | STAT3     | STAT3  | 0.264897  | 4 |
| V\$YY1_03      | YY1       | YY1    | 0.324002  | 3 |
| V\$IRF1_Q6_01  | IRF-1     | IRF1   | 0.30332   | 3 |
| V\$IRF1_Q6     | IRF-1     | IRF1   | 0.30332   | 3 |
| V\$SP3_Q3      | Sp3       | SP3    | 0.325528  | 2 |
| V\$BLIMP1_Q6   | Blimp-1   | PRDM1  | 0.0493741 | 1 |

hsa-mir-204

| Matrix_id      | transcription factor | Gene  | PCC       | Occurrence |
|----------------|----------------------|-------|-----------|------------|
| V\$PUR1_Q4     | PUR1                 | PURA  | 0.181171  | 84         |
| V\$PARP_Q4     | PARP                 | PARP1 | 0.192357  | 83         |
| V\$ELF1_Q6     | Elf-1                | ELF1  | 0.0264517 | 77         |
| V\$SMAD4_Q6_01 | Smad4                | SMAD4 | 0.0303078 | 76         |
| V\$NR1B2_Q6    | NR1B2                | RARB  | 0.202756  | 72         |
| V\$CDX2_Q5_02  | CDX-2                | CDX2  | 0.0280741 | 72         |

|                |            |        |            |    |
|----------------|------------|--------|------------|----|
| V\$TBP_Q6      | TBP        | TBP    | 0.213633   | 72 |
| V\$GR_Q6       | GR         | NR3C1  | 0.0818852  | 72 |
| V\$P300_01     | p300       | EP300  | 0.0699217  | 71 |
| V\$HNF4A_Q6_01 | HNF-4alpha | HNF4A  | 0.546629   | 70 |
| V\$MEF2C_Q4    | MEF-2C     | MEF2C  | 0.186977   | 68 |
| V\$SMAD3_Q6_01 | Smad3      | SMAD3  | 0.0532211  | 68 |
| V\$ZIC3_01     | Zic3       | ZIC3   | 0.679025   | 66 |
| V\$YY1_01      | YY1        | YY1    | 0.0459148  | 65 |
| V\$CDX2_Q5_01  | Cdx-2      | CDX2   | 0.0280741  | 63 |
| V\$ETS1_B      | c-Ets-1    | ETS1   | 0.0940024  | 63 |
| V\$CETS1_Q6    | C-ets-1    | ETS1   | 0.0940024  | 61 |
| V\$IPF1_Q6     | IPF1       | PDX1   | 0.0338052  | 59 |
| V\$DLX5_01     | dlx5       | DLX5   | 0.203327   | 58 |
| V\$YY1_Q6_02   | YY1        | YY1    | 0.0459148  | 58 |
| V\$IPF1_Q4_01  | IPF1       | PDX1   | 0.0338052  | 58 |
| V\$Elf5_03     | ELF5       | ELF5   | 0.165555   | 58 |
| V\$GABPA_Q4    | GABP-alpha | GABPA  | 0.0964245  | 58 |
| V\$AP4_Q6_02   | AP-4       | TFAP4  | 0.326813   | 58 |
| V\$YY1_Q6      | YY1        | YY1    | 0.0459148  | 57 |
| V\$ERBETA_Q5   | ER-beta    | ESR2   | 0.0998605  | 56 |
| V\$IPF1_01     | IPF1       | PDX1   | 0.0338052  | 56 |
| V\$NKX32_01    | Nkx3-2     | NKX3-2 | 0.0100384  | 53 |
| V\$ING4_01     | ING4       | ING4   | 0.262196   | 53 |
| V\$IRF4_Q6     | IRF-4      | IRF4   | 0.110294   | 52 |
| V\$PBX1_Q3     | Pbx1       | PBX1   | 0.276191   | 52 |
| V\$GATA3_01    | GATA-3     | GATA3  | 0.0268125  | 51 |
| V\$PARP_Q3     | PARP       | PARP1  | 0.192357   | 51 |
| V\$E47_02      | E47        | TCF3   | 0.0671175  | 48 |
| V\$E12_Q6      | E12        | TCF3   | 0.0671175  | 48 |
| V\$E2A_Q6      | E2A        | TCF3   | 0.0671175  | 48 |
| V\$FOXJ2_01    | FOXJ2      | FOXJ2  | 0.0444273  | 47 |
| V\$AP4_Q5      | AP-4       | TFAP4  | 0.326813   | 44 |
| V\$CEBPE_Q6    | CEBPE      | CEBPE  | 0.00392263 | 44 |
| V\$YY1_Q6_03   | YY1        | YY1    | 0.0459148  | 43 |
| V\$RFX1_02     | RFX1       | RFX1   | 0.0142555  | 40 |
| V\$PITX3_Q2    | PITX3      | PITX3  | 0.0487708  | 39 |
| V\$CRX_Q4      | Crx        | CRX    | 0.162233   | 39 |
| V\$GATA3_03    | GATA-3     | GATA3  | 0.0268125  | 38 |
| V\$HIF1A_Q6    | HIF-1alpha | HIF1A  | 0.0914664  | 37 |
| V\$E2A_Q2      | E2A        | TCF3   | 0.0671175  | 37 |
| V\$ARNT_01     | Arnt       | ARNT   | 0.0198071  | 37 |
| V\$IRF8_Q6     | IRF-8      | IRF8   | 0.0398261  | 36 |
| V\$RFX1_01     | RFX1       | RFX1   | 0.0142555  | 35 |
| V\$SMAD3_Q6    | SMAD3      | SMAD3  | 0.0532211  | 35 |
| V\$PIT1_Q6     | Pit-1      | POU1F1 | 0.195302   | 35 |
| V\$NKX2B_Q3    | NKX2B      | NKX2-2 | 0.203899   | 34 |

|              |         |        |           |    |
|--------------|---------|--------|-----------|----|
| V\$ELF5_01   | ELF5    | ELF5   | 0.165555  | 33 |
| V\$SREBP1_Q6 | SREBP-1 | SREBF1 | 0.0446764 | 32 |
| V\$NURR1_Q3  | NURR1   | NR4A2  | 0.100714  | 30 |
| V\$EGR1_02   | EGR-1   | EGR1   | 0.274668  | 30 |
| V\$NKX22_02  | NKX2B   | NKX2-2 | 0.203899  | 29 |
| V\$ZIC1_01   | Zic1    | ZIC1   | 0.25411   | 28 |
| V\$CP2_01    | CP2     | TFCP2  | 0.30586   | 27 |
| V\$MEF2A_Q6  | mef2A   | MEF2A  | 0.0541596 | 27 |
| V\$PAX8_01   | Pax-8   | PAX8   | 0.213148  | 25 |
| V\$CRX_02    | Crx     | CRX    | 0.162233  | 22 |
| V\$SMAD4_Q6  | SMAD4   | SMAD4  | 0.0303078 | 17 |
| V\$GLI2_01   | GLI2    | GLI2   | 0.0301329 | 5  |

hsa-mir-205

| Matrix_id      | transcription factor | Gene   | PCC       | Occurrence |
|----------------|----------------------|--------|-----------|------------|
| V\$YY1_01      | YY1                  | YY1    | 0.273947  | 5          |
| V\$IK_Q5       | Ikaros               | IKZF1  | 0.183815  | 5          |
| V\$GR_Q6       | GR                   | NR3C1  | 0.18984   | 5          |
| V\$GKLF_Q4     | GKLF                 | KLF4   | 0.1814    | 5          |
| V\$PUR1_Q4     | PUR1                 | PURA   | 0.112523  | 5          |
| V\$NFAT4_Q3    | NF-AT4               | NFATC3 | 0.539784  | 4          |
| V\$SMAD4_Q6_01 | Smad4                | SMAD4  | 0.0261302 | 4          |
| V\$AHR_Q5      | AhR                  | AHR    | 0.193886  | 4          |
| V\$AML1_Q6     | AML1                 | RUNX1  | 0.0302832 | 4          |
| V\$ELF1_Q6     | Elf-1                | ELF1   | 0.735897  | 4          |
| V\$AML2_Q3     | AML2                 | RUNX3  | 0.145346  | 4          |
| V\$SOX9_B1     | SOX9                 | SOX9   | 0.147762  | 4          |
| V\$GATA2_02    | GATA-2               | GATA2  | 0.11398   | 4          |
| V\$CMYB_Q5     | c-Myb                | MYB    | 0.674471  | 3          |
| V\$Elf5_03     | ELF5                 | ELF5   | 0.177529  | 3          |
| V\$AML1_Q4     | AML1                 | RUNX1  | 0.0302832 | 3          |
| V\$HMG1Y_01    | HMG1Y                | HMGA1  | 0.428777  | 3          |
| V\$DLX5_01     | dlx5                 | DLX5   | 0.0303426 | 3          |
| V\$SOX9_Q4     | SOX9                 | SOX9   | 0.147762  | 3          |
| V\$AML2_Q3_01  | AML2                 | RUNX3  | 0.145346  | 3          |
| V\$IRF7_Q3     | IRF-7                | IRF7   | 0.184351  | 3          |
| V\$MYB_Q6      | c-Myb                | MYB    | 0.674471  | 3          |
| V\$AML1_01     | AML1a                | RUNX1  | 0.0302832 | 3          |
| V\$GATA2_03    | GATA-2               | GATA2  | 0.11398   | 3          |
| V\$GATA3_02    | GATA-3               | GATA3  | 0.425813  | 3          |
| V\$YY1_Q6_03   | YY1                  | YY1    | 0.273947  | 3          |
| V\$ESE1_02     | ESE-1                | ELF3   | 0.269092  | 2          |

|             |        |       |           |   |
|-------------|--------|-------|-----------|---|
| V\$EHF_03   | EHF    | EHF   | 0.310676  | 2 |
| V\$AML2_01  | AML2   | RUNX3 | 0.145346  | 2 |
| V\$GATA2_01 | GATA-2 | GATA2 | 0.11398   | 2 |
| V\$GATA3_01 | GATA-3 | GATA3 | 0.425813  | 2 |
| V\$FAC1_01  | FAC1   | BPTF  | 0.0889841 | 2 |
| V\$GR_01    | GR     | NR3C1 | 0.18984   | 2 |
| V\$ELF5_01  | ELF5   | ELF5  | 0.177529  | 2 |
| V\$SPIB_01  | SPI-B  | SPIB  | 0.0995714 | 2 |
| V\$ESE1_Q3  | ESE-1  | ELF3  | 0.269092  | 2 |
| V\$PET1_02  | Pet-1  | FEV   | 0.161418  | 2 |
| V\$IRF7_01  | IRF-7  | IRF7  | 0.184351  | 1 |
| V\$HOXB8_01 | HOXB8  | HOXB8 | 0.14782   | 1 |

hsa-mir-206

| Matrix_id      | transcription factor | Gene   | PCC       | Occurrence |
|----------------|----------------------|--------|-----------|------------|
| V\$PUR1_Q4     | PUR1                 | PURA   | 0.427293  | 2324       |
| V\$IK_Q5       | Ikaros               | IKZF1  | 0.798112  | 2271       |
| V\$PARP_Q4     | PARP                 | PARP1  | 0.655074  | 2245       |
| V\$PEA3_Q6     | PEA3                 | ETV4   | 0.796234  | 2208       |
| V\$AP2REP_01   | AP-2rep              | KLF12  | 0.865701  | 2176       |
| V\$P300_01     | p300                 | EP300  | 0.833364  | 2158       |
| V\$ZIC3_01     | Zic3                 | ZIC3   | 0.363217  | 1992       |
| V\$MYB_Q6      | c-Myb                | MYB    | 0.288639  | 1979       |
| V\$CMYB_Q5     | c-Myb                | MYB    | 0.288639  | 1979       |
| V\$SMAD4_Q6_01 | Smad4                | SMAD4  | 0.73618   | 1979       |
| V\$TBP_Q6      | TBP                  | TBP    | 0.252818  | 1945       |
| V\$CDX2_Q5_02  | CDX-2                | CDX2   | 0.888579  | 1945       |
| V\$NFAT4_Q3    | NF-AT4               | NFATC3 | 0.569094  | 1938       |
| V\$CETS1_Q6    | C-ets-1              | ETS1   | 0.399693  | 1901       |
| V\$ETS1_B      | c-Ets-1              | ETS1   | 0.399693  | 1885       |
| V\$GATA1_01    | GATA-1               | GATA1  | 0.441914  | 1868       |
| V\$NR1B2_Q6    | NR1B2                | RARB   | 0.710477  | 1866       |
| V\$TTF1_Q5     | TTF-1                | NKX2-1 | 0.342699  | 1864       |
| V\$ETS2_Q6     | c-Ets-2              | ETS2   | 0.696634  | 1829       |
| V\$GABPA_Q4    | GABP-alpha           | GABPA  | 0.475791  | 1805       |
| V\$MEF2C_Q4    | MEF-2C               | MEF2C  | 0.48074   | 1797       |
| V\$YY1_01      | YY1                  | YY1    | 0.449055  | 1793       |
| V\$SMAD3_Q6_01 | Smad3                | SMAD3  | 0.884959  | 1766       |
| V\$DLX5_01     | dlx5                 | DLX5   | 0.158001  | 1757       |
| V\$GR_Q6       | GR                   | NR3C1  | 0.724236  | 1753       |
| V\$NANOG_02    | Nanog                | NANOG  | 0.940205  | 1745       |
| V\$Elf5_03     | ELF5                 | ELF5   | 0.0498177 | 1743       |

|                |            |        |           |      |
|----------------|------------|--------|-----------|------|
| V\$IPF1_Q1     | IPF1       | PDX1   | 0.925961  | 1695 |
| V\$SOX5_Q1     | SOX5       | SOX5   | 0.506177  | 1680 |
| V\$SPI1_Q3     | SPI1       | SPI1   | 0.174527  | 1673 |
| V\$HNF4A_Q6_Q1 | HNF-4alpha | HNF4A  | 0.188188  | 1656 |
| V\$AML1_Q6     | AML1       | RUNX1  | 0.6406    | 1652 |
| V\$ETS2_B      | c-Ets-2    | ETS2   | 0.696634  | 1625 |
| V\$YY1_Q6      | YY1        | YY1    | 0.449055  | 1618 |
| V\$IPF1_Q6     | IPF1       | PDX1   | 0.925961  | 1610 |
| V\$AP4_Q6_Q2   | AP-4       | TFAP4  | 0.653172  | 1599 |
| V\$GATA1_Q6    | GATA-1     | GATA1  | 0.441914  | 1591 |
| V\$GATA2_Q2    | GATA-2     | GATA2  | 0.403122  | 1591 |
| V\$GATA1_Q5    | GATA-1     | GATA1  | 0.441914  | 1591 |
| V\$SPI1_Q5     | SPI1       | SPI1   | 0.174527  | 1585 |
| V\$IPF1_Q4_Q1  | IPF1       | PDX1   | 0.925961  | 1552 |
| V\$YY1_Q6_Q2   | YY1        | YY1    | 0.449055  | 1535 |
| V\$SRY_Q2      | SRY        | SRY    | 0.701258  | 1532 |
| V\$NKX32_Q1    | Nkx3-2     | NKX3-2 | 0.847422  | 1468 |
| V\$CDX2_Q1     | Cdx-2      | CDX2   | 0.888579  | 1467 |
| V\$PITX3_Q2    | PITX3      | PITX3  | 0.653394  | 1447 |
| V\$PARP_Q3     | PARP       | PARP1  | 0.655074  | 1445 |
| V\$NFAT2_Q5    | NF-AT2     | NFATC1 | 0.882529  | 1419 |
| V\$IRF4_Q6     | IRF-4      | IRF4   | 0.87943   | 1407 |
| V\$HMGY1_Q1    | HMGY1      | HMGY1  | 0.0459198 | 1398 |
| V\$MAZ_Q6      | MAZ        | MAZ    | 0.185364  | 1398 |
| V\$ERBETA_Q5   | ER-beta    | ESR2   | 0.736373  | 1391 |
| V\$LRP2_Q2     | LRP2       | ZBTB7A | 0.782433  | 1371 |
| V\$HNF3A_Q1    | HNF3A      | FOXA1  | 0.472129  | 1329 |
| V\$CRX_Q4      | Crx        | CRX    | 0.709578  | 1316 |
| V\$IPF1_Q4     | IPF1       | PDX1   | 0.925961  | 1299 |
| V\$MYOGENIN_Q6 | myogenin   | MYOG   | 0.794268  | 1219 |
| V\$LEF1_Q5     | LEF-1      | LEF1   | 0.0286833 | 1212 |
| V\$TCF3_Q1     | TCF-3      | TCF7L1 | 0.693715  | 1211 |
| V\$GFI1_Q6     | Gfi1       | GFI1   | 0.339111  | 1209 |
| V\$GFI1_Q6_Q1  | Gfi1       | GFI1   | 0.339111  | 1186 |
| V\$PITX2_Q2    | Pitx2      | PITX2  | 0.779874  | 1181 |
| V\$CEBPE_Q6    | CEBPE      | CEBPE  | 0.161939  | 1170 |
| V\$IRF8_Q6     | IRF-8      | IRF8   | 0.0278654 | 1130 |
| V\$SOX10_Q6    | SOX10      | SOX10  | 0.421037  | 1128 |
| V\$AP4_Q5      | AP-4       | TFAP4  | 0.653172  | 1126 |
| V\$FKLF_Q5     | FKLF       | KLF11  | 0.0978596 | 1121 |
| V\$TEF1_Q6_Q3  | TEF-1      | TEAD1  | 0.910778  | 1117 |
| V\$FOXO1_Q1    | FOXO1      | FOXO1  | 0.207297  | 1112 |
| V\$RFX1_Q2     | RFX1       | RFX1   | 0.942922  | 1061 |
| V\$CRX_Q4_Q1   | CRX        | CRX    | 0.709578  | 1003 |
| V\$TEF1_Q6     | TEF-1      | TEAD1  | 0.910778  | 984  |
| V\$RFX1_Q1     | RFX1       | RFX1   | 0.942922  | 979  |

|                   |            |         |           |     |
|-------------------|------------|---------|-----------|-----|
| V\$AP4_Q6         | AP-4       | TFAP4   | 0.653172  | 971 |
| V\$IRF7_Q3        | IRF-7      | IRF7    | 0.030503  | 942 |
| V\$ELF5_Q1        | ELF5       | ELF5    | 0.0498177 | 937 |
| V\$MYOGENIN_Q6_Q1 | myogenin   | MYOG    | 0.794268  | 897 |
| V\$FAC1_Q1        | FAC1       | BPTF    | 0.375185  | 884 |
| V\$CEBPB_Q2       | C/EBPbeta  | CEBPB   | 0.231501  | 881 |
| V\$CEBPD_Q6       | C/EBPdelta | CEBPD   | 0.198586  | 871 |
| V\$KLF15_Q2       | KLF15      | KLF15   | 0.0520265 | 795 |
| V\$HOXD9_Q2       | Hoxd9      | HOXD9   | 0.628729  | 777 |
| V\$DBP_Q6_Q1      | DBP        | DBP     | 0.860367  | 765 |
| V\$CEBPB_Q6       | C/EBPbeta  | CEBPB   | 0.231501  | 748 |
| V\$AP4_Q6_Q1      | AP-4       | TFAP4   | 0.653172  | 717 |
| V\$IPF1_Q2        | IPF1       | PDX1    | 0.925961  | 664 |
| V\$YY1_Q2         | YY1        | YY1     | 0.449055  | 661 |
| V\$HNF6_Q6        | HNF6       | ONECUT1 | 0.219596  | 650 |
| V\$HOXB8_Q1       | HOXB8      | HOXB8   | 0.522422  | 560 |
| V\$STAT4_Q5       | STAT4      | STAT4   | 0.799726  | 483 |
| V\$P53_Q2         | p53        | TP53    | 0.369416  | 479 |
| V\$EAR2_Q2        | EAR2       | NR2F6   | 0.301724  | 472 |
| V\$SOX2_Q6        | SOX2       | SOX2    | 0.252655  | 442 |
| V\$CREL_Q1        | c-Rel      | REL     | 0.636143  | 433 |
| V\$RORBETA_Q2     | RORBETA    | RORB    | 0.816269  | 417 |
| V\$POU6F1_Q3      | POU6F1     | POU6F1  | 0.517557  | 397 |
| V\$CEBPB_Q1       | C/EBPbeta  | CEBPB   | 0.231501  | 378 |
| V\$SPIB_Q1        | SPI-B      | SPIB    | 0.326225  | 322 |
| V\$POU6F1_Q2      | POU6F1     | POU6F1  | 0.517557  | 313 |
| V\$AMEF2_Q6       | aMEF-2     | MEF2A   | 0.173478  | 289 |

hsa-mir-20b

| Matrix_id    | transcription factor | Gene   | PCC       | Occurrence |
|--------------|----------------------|--------|-----------|------------|
| V\$CMYB_Q1   | c-Myb                | MYB    | 0.61151   | 3          |
| V\$IK_Q5     | Ikaros               | IKZF1  | 0.174961  | 3          |
| V\$YY1_Q6_Q2 | YY1                  | YY1    | 0.149368  | 3          |
| V\$GR_Q1     | GR                   | NR3C1  | 0.10348   | 3          |
| V\$YY1_Q6    | YY1                  | YY1    | 0.149368  | 3          |
| V\$PUR1_Q4   | PUR1                 | PURA   | 0.0599175 | 3          |
| V\$ELF1_Q6   | Elf-1                | ELF1   | 0.525298  | 3          |
| V\$CETS1_Q6  | C-ets-1              | ETS1   | 0.124359  | 3          |
| V\$GATA2_Q1  | GATA-2               | GATA2  | 0.0563743 | 3          |
| V\$ETS1_B    | c-Ets-1              | ETS1   | 0.124359  | 3          |
| V\$GR_Q6     | GR                   | NR3C1  | 0.10348   | 3          |
| V\$NFAT4_Q3  | NF-AT4               | NFATC3 | 0.464244  | 3          |

|               |        |        |           |   |
|---------------|--------|--------|-----------|---|
| V\$GATA3_01   | GATA-3 | GATA3  | 0.420111  | 3 |
| V\$GFI1_Q6_01 | Gfi1   | GFI1   | 0.651682  | 2 |
| V\$IRF8_Q6    | IRF-8  | IRF8   | 0.213775  | 2 |
| V\$YY1_Q6_03  | YY1    | YY1    | 0.149368  | 2 |
| V\$IRF7_Q3    | IRF-7  | IRF7   | 0.291078  | 2 |
| V\$HMG1Y_01   | HMG1Y  | HMGA1  | 0.300849  | 2 |
| V\$STAT1_05   | STAT1  | STAT1  | 0.21721   | 2 |
| V\$GFI1_Q6    | Gfi1   | GFI1   | 0.651682  | 2 |
| V\$YY1_01     | YY1    | YY1    | 0.149368  | 2 |
| V\$GATA3_03   | GATA-3 | GATA3  | 0.420111  | 2 |
| V\$ZABC1_01   | ZABC1  | ZNF217 | 0.246383  | 1 |
| V\$CP2_01     | CP2    | TFCP2  | 0.0468669 | 1 |
| V\$AHR_01     | AhR    | AHR    | 0.0691786 | 1 |
| V\$AFP1_Q6    | AFP1   | ZFH3   | 0.322208  | 1 |
| V\$STAT1_Q6   | STAT1  | STAT1  | 0.21721   | 1 |
| V\$AML2_Q3    | AML2   | RUNX3  | 0.0327857 | 1 |
| V\$ING4_01    | ING4   | ING4   | 0.218296  | 1 |
| V\$AHR_Q5     | AhR    | AHR    | 0.0691786 | 1 |
| V\$YY1_03     | YY1    | YY1    | 0.149368  | 1 |

hsa-mir-210

| Matrix_id      | transcription factor | Gene  | PCC       | Occurrence |
|----------------|----------------------|-------|-----------|------------|
| V\$PEA3_Q6     | PEA3                 | ETV4  | 0.181904  | 31         |
| V\$PUR1_Q4     | PUR1                 | PURA  | 0.22257   | 31         |
| V\$MAFB_01     | MAFB                 | MAFB  | 0.325891  | 30         |
| V\$ELF1_Q6     | Elf-1                | ELF1  | 0.135001  | 29         |
| V\$PARP_Q4     | PARP                 | PARP1 | 0.106653  | 28         |
| V\$P300_01     | p300                 | EP300 | 0.328326  | 28         |
| V\$GATA1_01    | GATA-1               | GATA1 | 0.15547   | 28         |
| V\$TBP_Q6      | TBP                  | TBP   | 0.263922  | 27         |
| V\$CETS1_Q6    | C-ets-1              | ETS1  | 0.0847119 | 27         |
| V\$ETS1_B      | c-Ets-1              | ETS1  | 0.0847119 | 26         |
| V\$SOX9_Q4     | SOX9                 | SOX9  | 0.217622  | 26         |
| V\$SMAD4_Q6_01 | Smad4                | SMAD4 | 0.261466  | 26         |
| V\$ETS2_Q6     | c-Ets-2              | ETS2  | 0.191525  | 26         |
| V\$GABPA_Q4    | GABP-alpha           | GABPA | 0.21627   | 26         |
| V\$YY1_Q6_02   | YY1                  | YY1   | 0.323527  | 25         |
| V\$GR_Q6       | GR                   | NR3C1 | 0.102412  | 24         |
| V\$YY1_Q6      | YY1                  | YY1   | 0.323527  | 24         |
| V\$ETS2_B      | c-Ets-2              | ETS2  | 0.191525  | 24         |
| V\$YY1_01      | YY1                  | YY1   | 0.323527  | 24         |
| V\$SPI1_Q5     | SPI1                 | SPI1  | 0.138715  | 24         |

|               |           |         |           |    |
|---------------|-----------|---------|-----------|----|
| V\$SPI1_03    | SPI1      | SPI1    | 0.138715  | 23 |
| V\$AML1_Q6    | AML1      | RUNX1   | 0.271904  | 21 |
| V\$SOX5_01    | SOX5      | SOX5    | 0.105141  | 21 |
| V\$GATA2_02   | GATA-2    | GATA2   | 0.656494  | 21 |
| V\$GATA1_06   | GATA-1    | GATA1   | 0.15547   | 21 |
| V\$GATA6_01   | GATA-6    | GATA6   | 0.0896153 | 21 |
| V\$DLX5_01    | dlx5      | DLX5    | 0.606654  | 21 |
| V\$AP4_Q6_02  | AP-4      | TFAP4   | 0.0973602 | 21 |
| V\$SOX9_B1    | SOX9      | SOX9    | 0.217622  | 21 |
| V\$GATA1_05   | GATA-1    | GATA1   | 0.15547   | 21 |
| V\$GATA3_02   | GATA-3    | GATA3   | 0.653216  | 19 |
| V\$FOXO3A_Q1  | FOXO3A    | FOXO3   | 0.168019  | 18 |
| V\$ZABC1_01   | ZABC1     | ZNF217  | 0.62802   | 17 |
| V\$HMG1Y_01   | HMG1Y     | HMG1A   | 0.253658  | 17 |
| V\$HNF3A_01   | HNF3A     | FOXA1   | 0.125     | 17 |
| V\$GATA3_01   | GATA-3    | GATA3   | 0.653216  | 17 |
| V\$GATA1_02   | GATA-1    | GATA1   | 0.15547   | 17 |
| V\$GATA2_01   | GATA-2    | GATA2   | 0.656494  | 16 |
| V\$NFAT2_Q5   | NF-AT2    | NFATC1  | 0.0251077 | 16 |
| V\$FOXJ2_01   | FOXJ2     | FOXJ2   | 0.260686  | 16 |
| V\$PITX2_01   | PITX2     | PITX2   | 0.382693  | 16 |
| V\$PARP_Q3    | PARP      | PARP1   | 0.106653  | 16 |
| V\$TCF4_Q5    | TCF-4     | TCF7L2  | 0.553351  | 16 |
| V\$TCF4_01    | TCF-4     | TCF7L2  | 0.553351  | 15 |
| V\$ELF5_01    | ELF5      | ELF5    | 0.263805  | 15 |
| V\$GATA1_04   | GATA-1    | GATA1   | 0.15547   | 15 |
| V\$SRX_02     | SRX       | SRX     | 0.0825501 | 15 |
| V\$OC2_Q3     | OC-2      | ONECUT2 | 0.0105236 | 15 |
| V\$LHX3b_01   | LHX3b     | LHX3    | 0.0998656 | 12 |
| V\$AML1_01    | AML1a     | RUNX1   | 0.271904  | 11 |
| V\$IRF7_Q3    | IRF-7     | IRF7    | 0.153576  | 11 |
| V\$GATA2_03   | GATA-2    | GATA2   | 0.656494  | 11 |
| V\$HOX13_02   | HOXA5     | HOXA5   | 0.0802415 | 10 |
| V\$CART1_02   | CART1     | ALX1    | 0.0311684 | 10 |
| V\$NURR1_Q3   | NURR1     | NR4A2   | 0.0111249 | 10 |
| V\$FOXO4_02   | FOXO4     | FOXO4   | 0.832802  | 9  |
| V\$LHX3_01    | Lhx3      | LHX3    | 0.0998656 | 7  |
| V\$P53_02     | p53       | TP53    | 0.379877  | 7  |
| V\$CIZ_01     | CIZ       | ZNF384  | 0.205713  | 7  |
| V\$IRF1_Q6_01 | IRF-1     | IRF1    | 0.464125  | 5  |
| V\$IRF1_Q6    | IRF-1     | IRF1    | 0.464125  | 5  |
| V\$HNF1B_01   | HNF-1beta | HNF1B   | 0.0319033 | 4  |
| V\$IRF7_01    | IRF-7     | IRF7    | 0.153576  | 3  |
| V\$NKX3A_02   | Nkx3A     | NKX3-1  | 0.218517  | 3  |
| V\$LHX3A_01   | Lhx3a     | LHX3    | 0.0998656 | 2  |
| V\$BLIMP1_Q6  | Blimp-1   | PRDM1   | 0.214247  | 1  |



|            |      |       |          |   |
|------------|------|-------|----------|---|
| V\$AFP1_Q6 | AFP1 | ZFHX3 | 0.229232 | 1 |
|------------|------|-------|----------|---|

hsa-mir-211

| Matrix_id      | transcription factor | Gene   | PCC        | Occurrence |
|----------------|----------------------|--------|------------|------------|
| V\$PUR1_Q4     | PUR1                 | PURA   | 0.0403035  | 123        |
| V\$AP2REP_01   | AP-2rep              | KLF12  | 0.00540787 | 120        |
| V\$PARP_Q4     | PARP                 | PARP1  | 0.0310238  | 119        |
| V\$IK_Q5       | Ikaros               | IKZF1  | 0.0572328  | 118        |
| V\$MAFB_Q1     | MAFB                 | MAFB   | 0.00464994 | 115        |
| V\$ELF1_Q6     | Elf-1                | ELF1   | 0.124011   | 112        |
| V\$SMAD4_Q6_01 | Smad4                | SMAD4  | 0.0506633  | 112        |
| V\$NR1B2_Q6    | NR1B2                | RARB   | 0.264421   | 110        |
| V\$GR_Q6       | GR                   | NR3C1  | 0.0918702  | 107        |
| V\$P300_01     | p300                 | EP300  | 0.0959255  | 107        |
| V\$CDX2_Q5_02  | CDX-2                | CDX2   | 0.111862   | 103        |
| V\$TBP_Q6      | TBP                  | TBP    | 0.0120179  | 103        |
| V\$SMAD3_Q6_01 | Smad3                | SMAD3  | 0.126372   | 101        |
| V\$ZIC3_Q1     | Zic3                 | ZIC3   | 0.563813   | 100        |
| V\$NANOG_Q2    | Nanog                | NANOG  | 0.0533247  | 97         |
| V\$CETS1_Q6    | C-ets-1              | ETS1   | 0.116323   | 92         |
| V\$ETS1_B      | c-Ets-1              | ETS1   | 0.116323   | 90         |
| V\$DLX5_Q1     | dlx5                 | DLX5   | 0.136087   | 89         |
| V\$CDX2_Q5_01  | Cdx-2                | CDX2   | 0.111862   | 89         |
| V\$IPF1_Q1     | IPF1                 | PDX1   | 0.0935221  | 88         |
| V\$GABPA_Q4    | GABP-alpha           | GABPA  | 0.0779106  | 88         |
| V\$Elf5_Q3     | ELF5                 | ELF5   | 0.269634   | 87         |
| V\$AP4_Q6_Q2   | AP-4                 | TFAP4  | 0.203206   | 87         |
| V\$IPF1_Q6     | IPF1                 | PDX1   | 0.0935221  | 87         |
| V\$SOX5_Q1     | SOX5                 | SOX5   | 0.213081   | 87         |
| V\$ERBETA_Q5   | ER-beta              | ESR2   | 0.142962   | 86         |
| V\$IPF1_Q4_Q1  | IPF1                 | PDX1   | 0.0935221  | 86         |
| V\$GATA2_Q2    | GATA-2               | GATA2  | 0.0036762  | 85         |
| V\$IRF4_Q6     | IRF-4                | IRF4   | 0.193121   | 82         |
| V\$GATA3_Q2    | GATA-3               | GATA3  | 0.104996   | 79         |
| V\$CDX2_Q1     | Cdx-2                | CDX2   | 0.111862   | 78         |
| V\$PBX1_Q4     | Pbx1                 | PBX1   | 0.154783   | 77         |
| V\$IPF1_Q4     | IPF1                 | PDX1   | 0.0935221  | 74         |
| V\$PBX1_Q3     | Pbx1                 | PBX1   | 0.154783   | 74         |
| V\$CMaf_Q1     | c-Maf                | MAF    | 0.732006   | 74         |
| V\$LRF_Q2      | LRF                  | ZBTB7A | 0.119704   | 74         |
| V\$PARP_Q3     | PARP                 | PARP1  | 0.0310238  | 72         |
| V\$CEBPE_Q6    | CEBPE                | CEBPE  | 0.143578   | 72         |

|                   |            |         |            |    |
|-------------------|------------|---------|------------|----|
| V\$GATA3_01       | GATA-3     | GATA3   | 0.104996   | 71 |
| V\$HNF1_02        | HNF-1alpha | HNF1A   | 0.22051    | 69 |
| V\$GFI1_Q6        | Gfi1       | GFI1    | 0.0794245  | 69 |
| V\$MYOGENIN_Q6    | myogenin   | MYOG    | 0.227856   | 67 |
| V\$AP4_Q5         | AP-4       | TFAP4   | 0.203206   | 66 |
| V\$ERR1_Q3        | ERR1       | ESRRA   | 0.160934   | 65 |
| V\$TEF1_Q6_03     | TEF-1      | TEAD1   | 0.0627031  | 65 |
| V\$AP4_Q6         | AP-4       | TFAP4   | 0.203206   | 64 |
| V\$SOX10_Q6       | SOX10      | SOX10   | 0.0342382  | 64 |
| V\$PITX3_Q2       | PITX3      | PITX3   | 0.062308   | 62 |
| V\$GFI1_Q6_01     | Gfi1       | GFI1    | 0.0794245  | 62 |
| V\$OC2_Q3         | OC-2       | ONECUT2 | 0.157844   | 58 |
| V\$GR_01          | GR         | NR3C1   | 0.0918702  | 55 |
| V\$IRF8_Q6        | IRF-8      | IRF8    | 0.0380851  | 55 |
| V\$MYOGENIN_Q6_01 | myogenin   | MYOG    | 0.227856   | 55 |
| V\$AP2ALPHA_Q6    | AP-2alpha  | TFAP2A  | 0.00711075 | 51 |
| V\$SMAD3_Q6       | SMAD3      | SMAD3   | 0.126372   | 51 |
| V\$FOXO4_Q2       | FOXO4      | FOXO4   | 0.0491282  | 50 |
| V\$HOXD9_Q2       | Hoxd9      | HOXD9   | 0.220421   | 49 |
| V\$PIT1_Q6        | Pit-1      | POU1F1  | 0.299175   | 48 |
| V\$AP4_Q6_01      | AP-4       | TFAP4   | 0.203206   | 45 |
| V\$HOXA9_Q1       | hoxa9      | HOXA9   | 0.444678   | 44 |
| V\$CRX_Q2         | Crx        | CRX     | 0.302851   | 42 |
| V\$CRX_Q4_Q1      | CRX        | CRX     | 0.302851   | 42 |
| V\$HNF6_Q6        | HNF6       | ONECUT1 | 0.104798   | 41 |
| V\$MATH1_Q2       | MATH1      | ATO1H1  | 0.295429   | 38 |
| V\$MYOD_Q6_Q2     | MyoD       | MYOD1   | 0.0248383  | 35 |
| V\$STAT4_Q5       | STAT4      | STAT4   | 0.10052    | 34 |
| V\$IPF1_Q2        | IPF1       | PDX1    | 0.0935221  | 31 |
| V\$CART1_Q2       | CART1      | ALX1    | 0.195312   | 31 |
| V\$TR4_Q2         | TR4        | NR2C2   | 0.0619776  | 30 |
| V\$HOX13_Q2       | HOXA5      | HOXA5   | 0.0520911  | 30 |
| V\$IPF1_Q6        | ipf1       | PDX1    | 0.0935221  | 29 |
| V\$ELK1_Q1        | Elk-1      | ELK1    | 0.165919   | 28 |
| V\$MITF_Q6        | MITF       | MITF    | 0.270395   | 26 |
| V\$IPF1_Q3        | IPF1       | PDX1    | 0.0935221  | 26 |
| V\$HNF1B_Q1       | HNF-1beta  | HNF1B   | 0.802887   | 22 |
| V\$CDP_Q4         | CDP        | CUX1    | 0.049784   | 19 |
| V\$HOXA7_Q1       | HOXA7      | HOXA7   | 0.316996   | 8  |
| V\$RORA_Q4        | RORalpha   | RORA    | 0.305524   | 8  |

hsa-mir-212

| Matrix_id | transcription factor | Gene | PCC | Occurrence |
|-----------|----------------------|------|-----|------------|
|-----------|----------------------|------|-----|------------|

|                |            |       |            |   |
|----------------|------------|-------|------------|---|
| V\$ZIC3_01     | Zic3       | ZIC3  | 0.143601   | 4 |
| V\$ING4_01     | ING4       | ING4  | 0.301261   | 4 |
| V\$PUR1_Q4     | PUR1       | PURA  | 0.0922767  | 4 |
| V\$SOX9_B1     | SOX9       | SOX9  | 0.163344   | 4 |
| V\$MAZ_Q6      | MAZ        | MAZ   | 0.214972   | 4 |
| V\$PARP_Q4     | PARP       | PARP1 | 0.136099   | 4 |
| V\$Elf5_03     | ELF5       | ELF5  | 0.0225727  | 4 |
| V\$AML1_Q6     | AML1       | RUNX1 | 0.024655   | 4 |
| V\$SOX9_Q4     | SOX9       | SOX9  | 0.163344   | 4 |
| V\$ELK1_02     | Elk-1      | ELK1  | 0.293691   | 3 |
| V\$AP4_Q6_02   | AP-4       | TFAP4 | 0.120424   | 3 |
| V\$HNF4A_Q6_01 | HNF-4alpha | HNF4A | 0.288847   | 3 |
| V\$ELK1_06     | ELK-1      | ELK1  | 0.293691   | 3 |
| V\$ER71_02     | ER71       | ETV2  | 0.112598   | 3 |
| V\$ELF5_01     | ELF5       | ELF5  | 0.0225727  | 3 |
| V\$NR1B2_Q6    | NR1B2      | RARB  | 0.0556042  | 3 |
| V\$TBP_Q6      | TBP        | TBP   | 0.0858653  | 3 |
| V\$VDR_Q3      | VDR        | VDR   | 0.0196072  | 2 |
| V\$AML1_01     | AML1a      | RUNX1 | 0.024655   | 2 |
| V\$MAZ_Q6_01   | MAZ        | MAZ   | 0.214972   | 2 |
| V\$CP2_01      | CP2        | TFCP2 | 0.134017   | 2 |
| V\$ERM_02      | Erm        | ETV5  | 0.275232   | 2 |
| V\$PET1_02     | Pet-1      | FEV   | 0.00412795 | 2 |
| V\$PDEF_02     | PDEF       | SPDEF | 0.045207   | 2 |
| V\$CREM_Q6     | CREM       | CREM  | 0.245319   | 2 |
| V\$SP2_01      | SP2        | SP2   | 0.134856   | 2 |
| V\$GATA6_01    | GATA-6     | GATA6 | 0.617341   | 2 |
| V\$ELK1_03     | Elk-1      | ELK1  | 0.293691   | 1 |
| V\$ELK1_04     | Elk-1      | ELK1  | 0.293691   | 1 |
| V\$AP4_Q6_01   | AP-4       | TFAP4 | 0.120424   | 1 |
| V\$AML1_Q4     | AML1       | RUNX1 | 0.024655   | 1 |
| V\$HSF1_01     | HSF1       | HSF1  | 0.139059   | 1 |
| V\$AP4_Q5      | AP-4       | TFAP4 | 0.120424   | 1 |
| V\$AP4_Q6      | AP-4       | TFAP4 | 0.120424   | 1 |
| V\$MATH1_Q2    | MATH1      | ATO1  | 0.0393266  | 1 |
| V\$ZIC1_01     | Zic1       | ZIC1  | 0.453233   | 1 |
| V\$GLI_Q2      | GLI        | GLI1  | 0.167099   | 1 |

hsa-mir-215

| Matrix_id  | transcription factor | Gene | PCC     | Occurrence |
|------------|----------------------|------|---------|------------|
| V\$PUR1_Q4 | PUR1                 | PURA | 0.43025 | 37         |

|                |           |        |            |    |
|----------------|-----------|--------|------------|----|
| V\$ELF1_Q6     | Elf-1     | ELF1   | 0.332399   | 33 |
| V\$SMAD4_Q6_01 | Smad4     | SMAD4  | 0.0271747  | 33 |
| V\$YY1_01      | YY1       | YY1    | 0.165673   | 31 |
| V\$CETS1_Q6    | C-ets-1   | ETS1   | 0.176191   | 31 |
| V\$ETS2_Q6     | c-Ets-2   | ETS2   | 0.0177435  | 29 |
| V\$MYB_Q6      | c-Myb     | MYB    | 0.0575176  | 28 |
| V\$SOX5_01     | SOX5      | SOX5   | 0.00241572 | 28 |
| V\$SOX9_Q4     | SOX9      | SOX9   | 0.234278   | 28 |
| V\$CMYB_Q5     | c-Myb     | MYB    | 0.0575176  | 28 |
| V\$SOX9_B1     | SOX9      | SOX9   | 0.234278   | 28 |
| V\$GATA1_02    | GATA-1    | GATA1  | 0.152478   | 26 |
| V\$SPI1_Q5     | SPI1      | SPI1   | 0.0653078  | 25 |
| V\$GATA2_02    | GATA-2    | GATA2  | 0.309857   | 25 |
| V\$GATA1_06    | GATA-1    | GATA1  | 0.152478   | 25 |
| V\$GATA1_05    | GATA-1    | GATA1  | 0.152478   | 25 |
| V\$GATA1_04    | GATA-1    | GATA1  | 0.152478   | 24 |
| V\$FOXO3A_Q1   | FOXO3A    | FOXO3  | 0.175063   | 22 |
| V\$CMYB_01     | c-Myb     | MYB    | 0.0575176  | 22 |
| V\$GATA3_02    | GATA-3    | GATA3  | 0.0856937  | 22 |
| V\$LRF_Q2      | LRF       | ZBTB7A | 0.0275826  | 21 |
| V\$CMAF_01     | c-Maf     | MAF    | 0.233548   | 20 |
| V\$HNF3B_Q6    | HNF-3beta | FOXA2  | 0.107165   | 20 |
| V\$GFI1_Q6_01  | Gfi1      | GFI1   | 0.106535   | 19 |
| V\$GFI1_Q6     | Gfi1      | GFI1   | 0.106535   | 18 |
| V\$TCF4_Q5     | TCF-4     | TCF7L2 | 0.0517736  | 17 |
| V\$HNF3A_01    | HNF3A     | FOXA1  | 0.735575   | 16 |
| V\$ELF5_01     | ELF5      | ELF5   | 0.0139213  | 16 |
| V\$GATA2_03    | GATA-2    | GATA2  | 0.309857   | 15 |
| V\$HOXA9_01    | hoxa9     | HOXA9  | 0.393327   | 15 |
| V\$TCF4_01     | TCF-4     | TCF7L2 | 0.0517736  | 13 |
| V\$HOXD9_Q2    | Hoxd9     | HOXD9  | 0.0607979  | 12 |
| V\$CDX1_01     | Cdx-1     | CDX1   | 0.0282404  | 12 |
| V\$EAR2_Q2     | EAR2      | NR2F6  | 0.181468   | 7  |
| V\$HTF4_Q2     | HTF4      | TCF12  | 0.05525    | 7  |
| V\$ATF5_01     | ATF5      | ATF5   | 0.0871825  | 2  |
| V\$E4F1_Q6_01  | E4F1      | E4F1   | 0.204939   | 2  |
| V\$E4F1_Q6     | E4F1      | E4F1   | 0.204939   | 1  |

hsa-mir-218-1

| Matrix_id  | transcription factor | Gene | PCC      | Occurrence |
|------------|----------------------|------|----------|------------|
| V\$MAFB_01 | MAFB                 | MAFB | 0.304714 | 17         |
| V\$PUR1_Q4 | PUR1                 | PURA | 0.393752 | 17         |

|                |            |        |            |    |
|----------------|------------|--------|------------|----|
| V\$PARP_Q4     | PARP       | PARP1  | 0.228955   | 16 |
| V\$GKLF_Q4     | GKLF       | KLF4   | 0.212277   | 16 |
| V\$ZIC3_01     | Zic3       | ZIC3   | 0.0103631  | 16 |
| V\$AHR_Q5      | AhR        | AHR    | 0.208261   | 15 |
| V\$PBX1_04     | Pbx1       | PBX1   | 0.451471   | 14 |
| V\$AP4_Q6_02   | AP-4       | TFAP4  | 0.1857     | 14 |
| V\$ELK1_02     | Elk-1      | ELK1   | 0.108796   | 14 |
| V\$ELK1_06     | ELK-1      | ELK1   | 0.108796   | 13 |
| V\$FOXO3A_Q1   | FOXO3A     | FOXO3  | 0.0559445  | 13 |
| V\$SOX9_Q4     | SOX9       | SOX9   | 0.0759247  | 12 |
| V\$YY1_Q6_02   | YY1        | YY1    | 0.294638   | 12 |
| V\$HNF4A_Q6_01 | HNF-4alpha | HNF4A  | 0.00970896 | 12 |
| V\$ETS2_Q6     | c-Ets-2    | ETS2   | 0.122033   | 12 |
| V\$YY1_Q6      | YY1        | YY1    | 0.294638   | 11 |
| V\$GATA3_02    | GATA-3     | GATA3  | 0.1817     | 11 |
| V\$GATA6_01    | GATA-6     | GATA6  | 0.318599   | 11 |
| V\$MAZ_Q6      | MAZ        | MAZ    | 0.0182289  | 11 |
| V\$GATA2_02    | GATA-2     | GATA2  | 0.108162   | 11 |
| V\$AP2ALPHA_Q6 | AP-2alpha  | TFAP2A | 0.126621   | 10 |
| V\$AP2ALPHA_01 | AP-2alpha  | TFAP2A | 0.126621   | 9  |
| V\$TCF4_01     | TCF-4      | TCF7L2 | 0.190838   | 9  |
| V\$AP4_Q5      | AP-4       | TFAP4  | 0.1857     | 9  |
| V\$GABPBETA_Q3 | GABP-beta  | GABPB1 | 0.0282979  | 8  |
| V\$GATA3_03    | GATA-3     | GATA3  | 0.1817     | 8  |
| V\$NURR1_Q3    | NURR1      | NR4A2  | 0.394577   | 8  |
| V\$CP2_01      | CP2        | TFCP2  | 0.396996   | 7  |
| V\$CEBPB_02    | C/EBPbeta  | CEBPB  | 0.163141   | 7  |
| V\$KLF15_Q2    | KLF15      | KLF15  | 0.0260843  | 7  |
| V\$ERM_02      | Erm        | ETV5   | 0.471077   | 6  |
| V\$AP4_Q6      | AP-4       | TFAP4  | 0.1857     | 6  |
| V\$FAC1_01     | FAC1       | BPTF   | 0.0478956  | 6  |
| V\$TCF4_Q5     | TCF-4      | TCF7L2 | 0.190838   | 6  |
| V\$E2F1_Q3_01  | E2F-1      | E2F1   | 0.0526963  | 5  |
| V\$YY1_02      | YY1        | YY1    | 0.294638   | 5  |
| V\$E2F1_Q6_01  | E2F-1      | E2F1   | 0.0526963  | 5  |
| V\$AP4_01      | AP-4       | TFAP4  | 0.1857     | 5  |
| V\$AP4_Q6_01   | AP-4       | TFAP4  | 0.1857     | 3  |
| V\$E2F1_Q4     | E2F-1      | E2F1   | 0.0526963  | 3  |
| V\$AP2GAMMA_01 | AP-2gamma  | TFAP2C | 0.0930458  | 3  |
| V\$EAR2_Q2     | EAR2       | NR2F6  | 0.117923   | 2  |
| V\$ELK1_04     | Elk-1      | ELK1   | 0.108796   | 1  |

---

hsa-mir-218-2

---

| Matrix_id      | transcription factor | Gene   | PCC        | Occurrence |
|----------------|----------------------|--------|------------|------------|
| V\$MAFB_01     | MAFB                 | MAFB   | 0.304714   | 17         |
| V\$PUR1_Q4     | PUR1                 | PURA   | 0.393752   | 17         |
| V\$PARP_Q4     | PARP                 | PARP1  | 0.228955   | 16         |
| V\$PBX1_04     | Pbx1                 | PBX1   | 0.451471   | 14         |
| V\$DLX5_01     | dlx5                 | DLX5   | 0.123909   | 14         |
| V\$GATA3_01    | GATA-3               | GATA3  | 0.1817     | 13         |
| V\$FOXO3A_Q1   | FOXO3A               | FOXO3  | 0.0559445  | 13         |
| V\$SOX9_B1     | SOX9                 | SOX9   | 0.0759247  | 13         |
| V\$SOX9_Q4     | SOX9                 | SOX9   | 0.0759247  | 12         |
| V\$HNF4A_Q6_01 | HNF-4alpha           | HNF4A  | 0.00970896 | 12         |
| V\$ETS2_Q6     | c-Ets-2              | ETS2   | 0.122033   | 12         |
| V\$GR_Q6       | GR                   | NR3C1  | 0.0615529  | 12         |
| V\$ETS2_B      | c-Ets-2              | ETS2   | 0.122033   | 12         |
| V\$GATA3_02    | GATA-3               | GATA3  | 0.1817     | 11         |
| V\$GATA6_01    | GATA-6               | GATA6  | 0.318599   | 11         |
| V\$GATA2_02    | GATA-2               | GATA2  | 0.108162   | 11         |
| V\$PITX3_Q2    | PITX3                | PITX3  | 0.0762143  | 10         |
| V\$GATA2_01    | GATA-2               | GATA2  | 0.108162   | 10         |
| V\$MEF2C_Q4    | MEF-2C               | MEF2C  | 0.43002    | 10         |
| V\$TCF4_01     | TCF-4                | TCF7L2 | 0.190838   | 9          |
| V\$MEF2A_Q6    | mef2A                | MEF2A  | 0.444574   | 7          |
| V\$HBP1_Q2     | hbp1                 | HBP1   | 0.0495732  | 7          |
| V\$PARP_Q3     | PARP                 | PARP1  | 0.228955   | 7          |
| V\$DBP_Q6_01   | DBP                  | DBP    | 0.0257149  | 7          |
| V\$MSX1_01     | Msx-1                | MSX1   | 0.142232   | 7          |
| V\$TCF4_Q5     | TCF-4                | TCF7L2 | 0.190838   | 6          |
| V\$FAC1_01     | FAC1                 | BPTF   | 0.0478956  | 6          |
| V\$SOX10_Q6    | SOX10                | SOX10  | 0.344962   | 6          |
| V\$IRF8_Q6     | IRF-8                | IRF8   | 0.129931   | 5          |
| V\$HOXB8_01    | HOXB8                | HOXB8  | 0.101634   | 5          |
| V\$GATA2_03    | GATA-2               | GATA2  | 0.108162   | 5          |
| V\$CEBPD_Q6    | C/EBPdelta           | CEBPD  | 0.179053   | 5          |
| V\$CEBPB_Q6    | C/EBPbeta            | CEBPB  | 0.163141   | 5          |
| V\$SOX2_Q6     | SOX2                 | SOX2   | 0.164365   | 4          |
| V\$PIT1_Q6     | Pit-1                | POU1F1 | 0.0654956  | 4          |
| V\$CDP_Q4      | CDP                  | CUX1   | 0.38867    | 4          |
| V\$CEBPB_Q1    | C/EBPbeta            | CEBPB  | 0.163141   | 3          |
| V\$RSRFC4_Q2   | RSRFC4               | MEF2A  | 0.444574   | 3          |
| V\$CIIZ_01     | CIIZ                 | ZNF384 | 0.0728616  | 3          |
| V\$RSRFC4_Q1   | RSRFC4               | MEF2A  | 0.444574   | 2          |

hsa-mir-219-1

| Matrix_id           | transcription factor | Gene   | PCC        | Occurrence |
|---------------------|----------------------|--------|------------|------------|
| V\$PUR1_Q4          | PUR1                 | PURA   | 0.419204   | 491        |
| V\$MAFB_01          | MAFB                 | MAFB   | 0.17072    | 455        |
| V\$PARP_Q4          | PARP                 | PARP1  | 0.42116    | 448        |
| V\$ZIC3_01          | Zic3                 | ZIC3   | 0.198149   | 445        |
| V\$ETS2_Q6          | c-Ets-2              | ETS2   | 0.195107   | 409        |
| V\$SOX9_Q4          | SOX9                 | SOX9   | 0.241243   | 395        |
| V\$GABPA_Q4         | GABP-alpha           | GABPA  | 0.140881   | 395        |
| V\$TBP_Q6           | TBP                  | TBP    | 0.024102   | 386        |
| V\$NR1B2_Q6         | NR1B2                | RARB   | 0.00106793 | 385        |
| V\$MAZ_Q6           | MAZ                  | MAZ    | 0.224981   | 361        |
| V\$GR_Q6            | GR                   | NR3C1  | 0.0593375  | 354        |
| V\$YY1_Q6_02        | YY1                  | YY1    | 0.0987488  | 332        |
| V\$ETS2_B           | c-Ets-2              | ETS2   | 0.195107   | 332        |
| V\$YY1_Q6           | YY1                  | YY1    | 0.0987488  | 332        |
| V\$SOX9_B1          | SOX9                 | SOX9   | 0.241243   | 322        |
| V\$ZBP89_Q4         | ZBP89                | ZNF148 | 0.11751    | 294        |
| V\$TFII_Q6          | TFII-I               | GTF2I  | 0.268589   | 289        |
| V\$PARP_Q3          | PARP                 | PARP1  | 0.42116    | 288        |
| V\$HNF3B_Q6         | HNF-3beta            | FOXA2  | 0.0642184  | 274        |
| V\$ELK1_02          | Elk-1                | ELK1   | 0.110979   | 273        |
| V\$FOXO3A_Q1        | FOXO3A               | FOXO3  | 0.0478665  | 264        |
| V\$PBX1_04          | Pbx1                 | PBX1   | 0.230773   | 260        |
| V\$PITX3_Q2         | PITX3                | PITX3  | 0.0416587  | 260        |
| V\$MAZ_Q6_01        | MAZ                  | MAZ    | 0.224981   | 256        |
| V\$PBX1_Q3          | Pbx1                 | PBX1   | 0.230773   | 254        |
| V\$ELK1_06          | ELK-1                | ELK1   | 0.110979   | 238        |
| V\$KLF15_Q2         | KLF15                | KLF15  | 0.0413249  | 222        |
| V\$ERF_02           | ERF                  | ERF    | 0.239771   | 213        |
| V\$SOX10_Q6         | SOX10                | SOX10  | 0.727578   | 209        |
| V\$GR_01            | GR                   | NR3C1  | 0.0593375  | 205        |
| V\$SP2_01           | SP2                  | SP2    | 0.0908908  | 198        |
| V\$E2F1_Q3          | E2F-1                | E2F1   | 0.138356   | 182        |
| V\$CP2_01           | CP2                  | TFCP2  | 0.247501   | 174        |
| V\$ZIC1_01          | Zic1                 | ZIC1   | 0.95447    | 172        |
| V\$SP4_Q5           | SP4                  | SP4    | 0.0420767  | 164        |
| V\$FAC1_01          | FAC1                 | BPTF   | 0.14205    | 152        |
| V\$E2F1_Q6          | E2F-1                | E2F1   | 0.138356   | 146        |
| V\$YY1_02           | YY1                  | YY1    | 0.0987488  | 143        |
| V\$ELK1_01          | Elk-1                | ELK1   | 0.110979   | 127        |
| V\$ERM_02           | Erm                  | ETV5   | 0.168486   | 121        |
| V\$CACCCBINDINGFACT | CACCC-binding factor | ZNF148 | 0.11751    | 119        |
| V\$YY1_03           | YY1                  | YY1    | 0.0987488  | 86         |
| V\$E2F1_Q4          | E2F-1                | E2F1   | 0.138356   | 80         |

|            |       |       |           |    |
|------------|-------|-------|-----------|----|
| V\$GRE_C   | GR    | NR3C1 | 0.0593375 | 30 |
| V\$ELK1_04 | Elk-1 | ELK1  | 0.110979  | 18 |

hsa-mir-219-2

| Matrix_id    | transcription factor | Gene   | PCC        | Occurrence |
|--------------|----------------------|--------|------------|------------|
| V\$PUR1_Q4   | PUR1                 | PURA   | 0.419204   | 491        |
| V\$MAFB_01   | MAFB                 | MAFB   | 0.17072    | 455        |
| V\$PARP_Q4   | PARP                 | PARP1  | 0.42116    | 448        |
| V\$ZIC3_01   | Zic3                 | ZIC3   | 0.198149   | 445        |
| V\$TBP_Q6    | TBP                  | TBP    | 0.024102   | 386        |
| V\$MAZ_Q6    | MAZ                  | MAZ    | 0.224981   | 361        |
| V\$YY1_01    | YY1                  | YY1    | 0.0987488  | 359        |
| V\$MEF2C_Q4  | MEF-2C               | MEF2C  | 0.812276   | 351        |
| V\$DLX5_01   | dlx5                 | DLX5   | 0.00737451 | 327        |
| V\$SOX9_B1   | SOX9                 | SOX9   | 0.241243   | 322        |
| V\$ZBP89_Q4  | ZBP89                | ZNF148 | 0.11751    | 294        |
| V\$SRY_02    | SRY                  | SRY    | 0.180808   | 293        |
| V\$TFIIQ_Q6  | TFII-I               | GTF2I  | 0.268589   | 289        |
| V\$HNF3B_Q6  | HNF-3beta            | FOXA2  | 0.0642184  | 274        |
| V\$FOXO3A_Q1 | FOXO3A               | FOXO3  | 0.0478665  | 264        |
| V\$PITX3_Q2  | PITX3                | PITX3  | 0.0416587  | 260        |
| V\$PBX1_04   | Pbx1                 | PBX1   | 0.230773   | 260        |
| V\$MAZ_Q6_01 | MAZ                  | MAZ    | 0.224981   | 256        |
| V\$PBX1_Q3   | Pbx1                 | PBX1   | 0.230773   | 254        |
| V\$KLF15_Q2  | KLF15                | KLF15  | 0.0413249  | 222        |
| V\$NKX22_02  | NKX2B                | NKX2-2 | 0.881091   | 151        |
| V\$MEF2A_Q6  | mef2A                | MEF2A  | 0.67377    | 149        |
| V\$DBP_Q6_01 | DBP                  | DBP    | 0.27011    | 147        |
| V\$MSX1_01   | Msx-1                | MSX1   | 0.188441   | 118        |
| V\$USF2_Q6   | USF2                 | USF2   | 0.336519   | 87         |
| V\$MAX_01    | Max                  | MAX    | 0.546893   | 84         |
| V\$AMEF2_Q6  | aMEF-2               | MEF2A  | 0.67377    | 54         |
| V\$POU3F2_02 | POU3F2               | POU3F2 | 0.0699529  | 45         |
| V\$IRF2_01   | IRF-2                | IRF2   | 0.00408927 | 44         |
| V\$MAX_Q6    | MAX                  | MAX    | 0.546893   | 38         |
| V\$CDP_02    | CDP                  | CUX1   | 0.0613238  | 15         |

hsa-mir-22

| Matrix_id | transcription factor | Gene | PCC | Occurrence |
|-----------|----------------------|------|-----|------------|
|-----------|----------------------|------|-----|------------|



|                |            |          |           |     |
|----------------|------------|----------|-----------|-----|
| V\$IK_Q5       | Ikaros     | IKZF1    | 0.510882  | 103 |
| V\$PUR1_Q4     | PUR1       | PURA     | 0.356422  | 102 |
| V\$GKLF_Q4     | GKLF       | KLF4     | 0.160058  | 101 |
| V\$PEA3_Q6     | PEA3       | ETV4     | 0.669774  | 100 |
| V\$AP2REP_01   | AP-2rep    | KLF12    | 0.725178  | 97  |
| V\$PARP_Q4     | PARP       | PARP1    | 0.537067  | 97  |
| V\$P300_01     | p300       | EP300    | 0.769728  | 95  |
| V\$MAFB_01     | MAFB       | MAFB     | 0.0292692 | 94  |
| V\$ZIC3_01     | Zic3       | ZIC3     | 0.337725  | 93  |
| V\$SMAD4_Q6_01 | Smad4      | SMAD4    | 0.692398  | 91  |
| V\$MYB_Q6      | c-Myb      | MYB      | 0.0563637 | 90  |
| V\$CMYB_Q5     | c-Myb      | MYB      | 0.0563637 | 90  |
| V\$ETS2_Q6     | c-Ets-2    | ETS2     | 0.429337  | 87  |
| V\$CETS1_Q6    | C-ets-1    | ETS1     | 0.539656  | 85  |
| V\$TBX5_02     | TBX5       | TBX5     | 0.778279  | 85  |
| V\$Elf5_03     | ELF5       | ELF5     | 0.0522657 | 83  |
| V\$GATA1_01    | GATA-1     | GATA1    | 0.585762  | 83  |
| V\$GABPA_Q4    | GABP-alpha | GABPA    | 0.514659  | 83  |
| V\$ETS1_B      | c-Ets-1    | ETS1     | 0.539656  | 83  |
| V\$NR1B2_Q6    | NR1B2      | RARB     | 0.700365  | 82  |
| V\$TTF1_Q5     | TTF-1      | NKX2-1   | 0.151892  | 79  |
| V\$AML1_Q6     | AML1       | RUNX1    | 0.667671  | 78  |
| V\$NANOG_02    | Nanog      | NANOG    | 0.643979  | 77  |
| V\$DLX5_01     | dlx5       | DLX5     | 0.425646  | 77  |
| V\$GR_Q6       | GR         | NR3C1    | 0.547451  | 77  |
| V\$SPI1_Q5     | SPI1       | SPI1     | 0.160585  | 77  |
| V\$ETS2_B      | c-Ets-2    | ETS2     | 0.429337  | 76  |
| V\$YY1_Q6      | YY1        | YY1      | 0.483805  | 76  |
| V\$IPF1_01     | IPF1       | PDX1     | 0.722085  | 76  |
| V\$AP4_Q6_02   | AP-4       | TFAP4    | 0.417889  | 75  |
| V\$SMAD3_Q6_01 | Smad3      | SMAD3    | 0.550224  | 75  |
| V\$YY1_01      | YY1        | YY1      | 0.483805  | 74  |
| V\$MEF2C_Q4    | MEF-2C     | MEF2C    | 0.212044  | 73  |
| V\$TBX5_01     | TBX5       | TBX5     | 0.778279  | 73  |
| V\$YY1_Q6_02   | YY1        | YY1      | 0.483805  | 69  |
| V\$ZBP89_Q4    | ZBP89      | ZNF148   | 0.503578  | 69  |
| V\$BEN_01      | BEN        | GTF2IRD1 | 0.744349  | 69  |
| V\$SOX5_01     | SOX5       | SOX5     | 0.410951  | 66  |
| V\$SPI1_03     | SPI1       | SPI1     | 0.160585  | 66  |
| V\$E47_02      | E47        | TCF3     | 0.57359   | 65  |
| V\$E12_Q6      | E12        | TCF3     | 0.57359   | 65  |
| V\$E2A_Q6      | E2A        | TCF3     | 0.57359   | 65  |
| V\$MYOD_Q6_01  | MyoD       | MYOD1    | 0.580785  | 65  |
| V\$TEL1_02     | TEL1       | ETV6     | 0.685481  | 64  |
| V\$AHR_Q5      | AhR        | AHR      | 0.316666  | 64  |

|               |            |         |           |    |
|---------------|------------|---------|-----------|----|
| V\$GATA1_02   | GATA-1     | GATA1   | 0.585762  | 64 |
| V\$ING4_01    | ING4       | ING4    | 0.0651726 | 63 |
| V\$ELK1_02    | Elk-1      | ELK1    | 0.755558  | 63 |
| V\$ETV3_02    | ETV3       | ETV3    | 0.521562  | 62 |
| V\$ER71_02    | ER71       | ETV2    | 0.563336  | 60 |
| V\$SRY_02     | SRY        | SRY     | 0.368624  | 58 |
| V\$FOXO3A_Q1  | FOXO3A     | FOXO3   | 0.382459  | 56 |
| V\$ELK1_06    | ELK-1      | ELK1    | 0.755558  | 56 |
| V\$HNF3B_Q6   | HNF-3beta  | FOXA2   | 0.266096  | 55 |
| V\$ESE1_Q3    | ESE-1      | ELF3    | 0.042279  | 55 |
| V\$ETV7_01    | ETV7       | ETV7    | 0.725496  | 54 |
| V\$PARP_Q3    | PARP       | PARP1   | 0.537067  | 53 |
| V\$GATA1_04   | GATA-1     | GATA1   | 0.585762  | 53 |
| V\$ERF_02     | ERF        | ERF     | 0.353781  | 52 |
| V\$HNF1_02    | HNF-1alpha | HNF1A   | 0.584638  | 51 |
| V\$EHF_03     | EHF        | EHF     | 0.07343   | 51 |
| V\$HIF1A_Q6   | HIF-1alpha | HIF1A   | 0.132031  | 51 |
| V\$TFII_06    | TFII-I     | GTF2I   | 0.56936   | 51 |
| V\$GATA3_01   | GATA-3     | GATA3   | 0.346647  | 51 |
| V\$ARNT_01    | Arnt       | ARNT    | 0.798673  | 51 |
| V\$ZFX_01     | Zfx        | ZFX     | 0.639109  | 50 |
| V\$CMF_01     | c-Maf      | MAF     | 0.352015  | 49 |
| V\$AML2_Q3    | AML2       | RUNX3   | 0.296287  | 48 |
| V\$GFI1_Q6_01 | Gfi1       | GFI1    | 0.287909  | 47 |
| V\$GFI1_Q6    | Gfi1       | GFI1    | 0.287909  | 47 |
| V\$CP2_01     | CP2        | TFCP2   | 0.426252  | 46 |
| V\$FOXP3_01   | FOXP3      | FOXP3   | 0.700161  | 46 |
| V\$CREM_Q6    | CREM       | CREM    | 0.589525  | 45 |
| V\$FOXJ2_01   | FOXJ2      | FOXJ2   | 0.731814  | 45 |
| V\$ERR1_Q3    | ERR1       | ESRRA   | 0.762818  | 43 |
| V\$NEUROD_02  | NeuroD     | NEUROD1 | 0.620617  | 42 |
| V\$CEBPE_Q6   | CEBPE      | CEBPE   | 0.569255  | 42 |
| V\$ESE1_02    | ESE-1      | ELF3    | 0.042279  | 41 |
| V\$VDR_Q3     | VDR        | VDR     | 0.761277  | 41 |
| V\$RFX1_01    | RFX1       | RFX1    | 0.674361  | 40 |
| V\$NKX2B_Q3   | NKX2B      | NKX2-2  | 0.077318  | 39 |
| V\$AML1_01    | AML1a      | RUNX1   | 0.667671  | 39 |
| V\$SMAD3_Q6   | SMAD3      | SMAD3   | 0.550224  | 39 |
| V\$NKX22_02   | NKX2B      | NKX2-2  | 0.077318  | 37 |
| V\$IRF7_Q3    | IRF-7      | IRF7    | 0.151622  | 37 |
| V\$RFX1_02    | RFX1       | RFX1    | 0.674361  | 35 |
| V\$AML2_Q3_01 | AML2       | RUNX3   | 0.296287  | 35 |
| V\$ERG_03     | ERG        | ERG     | 0.762631  | 34 |
| V\$PAX8_01    | Pax-8      | PAX8    | 0.245238  | 34 |
| V\$AML1_Q4    | AML1       | RUNX1   | 0.667671  | 34 |
| V\$PET1_02    | Pet-1      | FEV     | 0.557489  | 33 |

|                     |                      |        |           |    |
|---------------------|----------------------|--------|-----------|----|
| V\$CEBPB_Q2         | C/EBPbeta            | CEBPB  | 0.476175  | 33 |
| V\$CACCCBINDINGFACT | CACCC-binding factor | ZNF148 | 0.503578  | 32 |
| V\$CEBPD_Q6         | C/EBPdelta           | CEBPD  | 0.328161  | 32 |
| V\$NURR1_Q3         | NURR1                | NR4A2  | 0.138209  | 31 |
| V\$ATF3_Q6_Q1       | ATF-3                | ATF3   | 0.371438  | 30 |
| V\$AML2_Q1          | AML2                 | RUNX3  | 0.296287  | 29 |
| V\$PDEF_Q2          | PDEF                 | SPDEF  | 0.114186  | 29 |
| V\$CEBPB_Q6         | C/EBPbeta            | CEBPB  | 0.476175  | 27 |
| V\$MSX1_Q1          | Msx-1                | MSX1   | 0.363295  | 27 |
| V\$EKLF_Q5          | EKLF                 | KLF1   | 0.708355  | 26 |
| V\$P53_Q2           | p53                  | TP53   | 0.558624  | 26 |
| V\$LHX3b_Q1         | LHX3b                | LHX3   | 0.754471  | 23 |
| V\$ERG_Q1           | ERG                  | ERG    | 0.762631  | 23 |
| V\$MITF_Q6          | MITF                 | MITF   | 0.356943  | 20 |
| V\$ERM_Q2           | Erm                  | ETV5   | 0.493488  | 20 |
| V\$HOXB8_Q1         | HOXB8                | HOXB8  | 0.352211  | 19 |
| V\$NCX_Q2           | Ncx                  | TLX2   | 0.717563  | 19 |
| V\$USF2_Q6          | USF2                 | USF2   | 0.626366  | 19 |
| V\$ARNT_Q2          | Arnt                 | ARNT   | 0.798673  | 19 |
| V\$NMYC_Q1          | N-Myc                | MYCN   | 0.743842  | 19 |
| V\$CART1_Q2         | CART1                | ALX1   | 0.730223  | 18 |
| V\$CMYC_Q2          | c-Myc                | MYC    | 0.0730954 | 18 |
| V\$MAX_Q1           | Max                  | MAX    | 0.106026  | 17 |
| V\$HOX13_Q2         | HOXA5                | HOXA5  | 0.333915  | 17 |
| V\$IPF1_Q3          | IPF1                 | PDX1   | 0.722085  | 16 |
| V\$IPF1_Q6          | ipf1                 | PDX1   | 0.722085  | 15 |
| V\$FLI1_Q2          | Fli-1                | FLI1   | 0.594115  | 13 |
| V\$SAP1A_Q1         | SAP-1a               | ELK4   | 0.755665  | 13 |
| V\$CEBPB_Q1         | C/EBPbeta            | CEBPB  | 0.476175  | 13 |
| V\$LHX3_Q1          | Lhx3                 | LHX3   | 0.754471  | 11 |
| V\$ATF5_Q1          | ATF5                 | ATF5   | 0.215914  | 10 |
| V\$LHX3A_Q1         | Lhx3a                | LHX3   | 0.754471  | 4  |

hsa-mir-221

| Matrix_id    | transcription factor | Gene  | PCC       | Occurrence |
|--------------|----------------------|-------|-----------|------------|
| V\$ARNT_Q1   | Arnt                 | ARNT  | 0.268851  | 4          |
| V\$YY1_Q6    | YY1                  | YY1   | 0.205565  | 4          |
| V\$TBP_Q6    | TBP                  | TBP   | 0.185699  | 4          |
| V\$MEF2C_Q4  | MEF-2C               | MEF2C | 0.0489535 | 4          |
| V\$PARP_Q4   | PARP                 | PARP1 | 0.0915547 | 4          |
| V\$YY1_Q6_Q2 | YY1                  | YY1   | 0.205565  | 4          |
| V\$ERR1_Q3   | ERR1                 | ESRRA | 0.161773  | 4          |

|                |           |         |            |   |
|----------------|-----------|---------|------------|---|
| V\$GKLF_Q4     | GKLF      | KLF4    | 0.404562   | 4 |
| V\$SMAD4_Q6_01 | Smad4     | SMAD4   | 0.233539   | 4 |
| V\$DLX5_01     | dlx5      | DLX5    | 0.358634   | 4 |
| V\$P300_01     | p300      | EP300   | 0.145849   | 4 |
| V\$NR1B2_Q6    | NR1B2     | RARB    | 0.0808548  | 4 |
| V\$YY1_02      | YY1       | YY1     | 0.205565   | 4 |
| V\$PUR1_Q4     | PUR1      | PURA    | 0.302581   | 4 |
| V\$GATA1_01    | GATA-1    | GATA1   | 0.451234   | 4 |
| V\$AP4_Q6_02   | AP-4      | TFAP4   | 0.00696687 | 3 |
| V\$YY1_03      | YY1       | YY1     | 0.205565   | 3 |
| V\$CMF1_01     | c-Maf     | MAF     | 0.0400562  | 3 |
| V\$E2A_Q6      | E2A       | TCF3    | 0.00426296 | 3 |
| V\$E2A_Q2      | E2A       | TCF3    | 0.00426296 | 3 |
| V\$MAFB_01     | MAFB      | MAFB    | 0.192797   | 3 |
| V\$ESE1_Q3     | ESE-1     | ELF3    | 0.0669412  | 3 |
| V\$YY1_Q6_03   | YY1       | YY1     | 0.205565   | 3 |
| V\$E12_Q6      | E12       | TCF3    | 0.00426296 | 3 |
| V\$ELK1_02     | Elk-1     | ELK1    | 0.16063    | 3 |
| V\$E47_Q2      | E47       | TCF3    | 0.00426296 | 3 |
| V\$GATA1_02    | GATA-1    | GATA1   | 0.451234   | 3 |
| V\$PARP_Q3     | PARP      | PARP1   | 0.0915547  | 3 |
| V\$ETV3_Q2     | ETV3      | ETV3    | 0.0570047  | 3 |
| V\$GATA1_Q4    | GATA-1    | GATA1   | 0.451234   | 3 |
| V\$ER71_Q2     | ER71      | ETV2    | 0.263589   | 3 |
| V\$ERF_Q2      | ERF       | ERF     | 0.0890964  | 3 |
| V\$ELK1_Q6     | ELK-1     | ELK1    | 0.16063    | 3 |
| V\$MAZ_Q6      | MAZ       | MAZ     | 0.190726   | 3 |
| V\$SOX9_B1     | SOX9      | SOX9    | 0.0166297  | 3 |
| V\$CEBPB_Q6    | C/EBPbeta | CEBPB   | 0.311773   | 3 |
| V\$ING4_Q1     | ING4      | ING4    | 0.318031   | 2 |
| V\$IRF7_Q3     | IRF-7     | IRF7    | 0.298676   | 2 |
| V\$ERR3_Q2     | ERR3      | ESRRG   | 0.390229   | 2 |
| V\$AML2_Q3     | AML2      | RUNX3   | 0.0445551  | 2 |
| V\$OC2_Q3      | OC-2      | ONECUT2 | 0.027775   | 2 |
| V\$HBP1_Q2     | hbp1      | HBP1    | 0.222192   | 2 |
| V\$POU6F1_Q3   | POU6F1    | POU6F1  | 0.209975   | 2 |
| V\$GATA3_Q2    | GATA-3    | GATA3   | 0.657182   | 2 |
| V\$GATA6_Q1    | GATA-6    | GATA6   | 0.0962413  | 2 |
| V\$FOXO4_Q2    | FOXO4     | FOXO4   | 0.689583   | 2 |
| V\$GATA2_Q2    | GATA-2    | GATA2   | 0.547199   | 2 |
| V\$AML1_Q6     | AML1      | RUNX1   | 0.185218   | 2 |
| V\$GATA1_Q6    | GATA-1    | GATA1   | 0.451234   | 2 |
| V\$TBX5_Q1     | TBX5      | TBX5    | 0.161411   | 2 |
| V\$TBX5_Q2     | TBX5      | TBX5    | 0.161411   | 2 |
| V\$GATA1_Q5    | GATA-1    | GATA1   | 0.451234   | 2 |
| V\$GR_Q6       | GR        | NR3C1   | 0.124036   | 2 |

|               |        |        |            |   |
|---------------|--------|--------|------------|---|
| V\$E47_01     | E47    | TCF3   | 0.00426296 | 2 |
| V\$HNF3A_01   | HNF3A  | FOXA1  | 0.0941203  | 2 |
| V\$SOX9_Q4    | SOX9   | SOX9   | 0.0166297  | 2 |
| V\$YY1_01     | YY1    | YY1    | 0.205565   | 2 |
| V\$AML1_01    | AML1a  | RUNX1  | 0.185218   | 1 |
| V\$ERR3_Q2_01 | ERR3   | ESRRG  | 0.390229   | 1 |
| V\$NKX2B_Q3   | NKX2B  | NKX2-2 | 0.0895642  | 1 |
| V\$AML1_Q4    | AML1   | RUNX1  | 0.185218   | 1 |
| V\$GATA3_Q3   | GATA-3 | GATA3  | 0.657182   | 1 |
| V\$POU6F1_02  | POU6F1 | POU6F1 | 0.209975   | 1 |
| V\$TCF4_01    | TCF-4  | TCF7L2 | 0.247904   | 1 |
| V\$AML2_01    | AML2   | RUNX3  | 0.0445551  | 1 |
| V\$SOX10_Q6   | SOX10  | SOX10  | 0.0328733  | 1 |
| V\$GFI1_Q6    | Gfi1   | GFI1   | 0.0591466  | 1 |
| V\$AML2_Q3_01 | AML2   | RUNX3  | 0.0445551  | 1 |
| V\$GR_01      | GR     | NR3C1  | 0.124036   | 1 |
| V\$IRF1_Q6    | IRF-1  | IRF1   | 0.2485     | 1 |
| V\$IRF1_Q6_01 | IRF-1  | IRF1   | 0.2485     | 1 |

hsa-mir-222

| Matrix_id      | transcription factor | Gene  | PCC       | Occurrence |
|----------------|----------------------|-------|-----------|------------|
| V\$PUR1_Q4     | PUR1                 | PURA  | 0.463487  | 7          |
| V\$YY1_Q6_02   | YY1                  | YY1   | 0.369631  | 6          |
| V\$TBP_Q6      | TBP                  | TBP   | 0.0141806 | 6          |
| V\$ELF1_Q6     | Elf-1                | ELF1  | 0.22436   | 6          |
| V\$SOX9_B1     | SOX9                 | SOX9  | 0.046787  | 6          |
| V\$MAFB_01     | MAFB                 | MAFB  | 0.180042  | 6          |
| V\$ETS1_B      | c-Ets-1              | ETS1  | 0.0754019 | 6          |
| V\$ARNT_01     | Arnt                 | ARNT  | 0.0834991 | 6          |
| V\$GKLF_Q4     | GKLF                 | KLF4  | 0.5273    | 6          |
| V\$YY1_Q6      | YY1                  | YY1   | 0.369631  | 6          |
| V\$SOX9_Q4     | SOX9                 | SOX9  | 0.046787  | 5          |
| V\$HNF3A_01    | HNF3A                | FOXA1 | 0.26256   | 5          |
| V\$PBX1_Q4     | Pbx1                 | PBX1  | 0.231469  | 5          |
| V\$P300_01     | p300                 | EP300 | 0.0808588 | 5          |
| V\$CETS1_Q6    | C-ets-1              | ETS1  | 0.0754019 | 5          |
| V\$SMAD4_Q6_01 | Smad4                | SMAD4 | 0.245999  | 5          |
| V\$GATA1_Q2    | GATA-1               | GATA1 | 0.178448  | 5          |
| V\$GR_Q6       | GR                   | NR3C1 | 0.259306  | 5          |
| V\$YY1_Q2      | YY1                  | YY1   | 0.369631  | 5          |
| V\$ETS2_B      | c-Ets-2              | ETS2  | 0.0181786 | 5          |
| V\$AHR_Q5      | AhR                  | AHR   | 0.749224  | 4          |

|                |           |        |            |   |
|----------------|-----------|--------|------------|---|
| V\$GATA1_01    | GATA-1    | GATA1  | 0.178448   | 4 |
| V\$GABPBETA_Q3 | GABP-beta | GABPB1 | 0.254984   | 4 |
| V\$IRF1_Q6_01  | IRF-1     | IRF1   | 0.0131248  | 4 |
| V\$YY1_Q6_03   | YY1       | YY1    | 0.369631   | 4 |
| V\$TCF4_01     | TCF-4     | TCF7L2 | 0.528252   | 4 |
| V\$GATA1_04    | GATA-1    | GATA1  | 0.178448   | 4 |
| V\$TFIIQ6      | TFII-I    | GTF2I  | 0.158473   | 4 |
| V\$ETS2_Q6     | c-Ets-2   | ETS2   | 0.0181786  | 4 |
| V\$GATA3_03    | GATA-3    | GATA3  | 0.695873   | 4 |
| V\$FKLF_Q5     | FKLF      | KLF11  | 0.00589394 | 3 |
| V\$GR_01       | GR        | NR3C1  | 0.259306   | 3 |
| V\$IRF1_Q6     | IRF-1     | IRF1   | 0.0131248  | 3 |
| V\$IRF7_Q3     | IRF-7     | IRF7   | 0.241972   | 3 |
| V\$WT1_Q6      | WT1       | WT1    | 0.0326525  | 3 |
| V\$CP2_01      | CP2       | TFCP2  | 0.270964   | 3 |
| V\$YY1_03      | YY1       | YY1    | 0.369631   | 3 |
| V\$CEBPB_Q6    | C/EBPbeta | CEBPB  | 0.283131   | 2 |
| V\$HTF4_Q2     | HTF4      | TCF12  | 0.0696102  | 2 |

hsa-mir-223

| Matrix_id    | transcription factor | Gene   | PCC       | Occurrence |
|--------------|----------------------|--------|-----------|------------|
| V\$GKLF_Q4   | GKLF                 | KLF4   | 0.745264  | 40         |
| V\$MAFB_01   | MAFB                 | MAFB   | 0.530797  | 40         |
| V\$ELF1_Q6   | Elf-1                | ELF1   | 0.126578  | 35         |
| V\$Elf5_Q3   | ELF5                 | ELF5   | 0.270236  | 34         |
| V\$AML1_Q6   | AML1                 | RUNX1  | 0.154739  | 33         |
| V\$ETS2_Q6   | c-Ets-2              | ETS2   | 0.333527  | 32         |
| V\$SPI1_Q3   | SPI1                 | SPI1   | 0.63079   | 32         |
| V\$TTF1_Q5   | TTF-1                | NKX2-1 | 0.372633  | 32         |
| V\$SPI1_Q5   | SPI1                 | SPI1   | 0.63079   | 31         |
| V\$ETS2_B    | c-Ets-2              | ETS2   | 0.333527  | 31         |
| V\$YY1_01    | YY1                  | YY1    | 0.0158048 | 30         |
| V\$FOXO3A_Q1 | FOXO3A               | FOXO3  | 0.24908   | 24         |
| V\$EHF_Q3    | EHF                  | EHF    | 0.249606  | 22         |
| V\$IRF8_Q6   | IRF-8                | IRF8   | 0.244708  | 22         |
| V\$GATA3_01  | GATA-3               | GATA3  | 0.18934   | 22         |
| V\$AML1_01   | AML1a                | RUNX1  | 0.154739  | 22         |
| V\$ESE1_Q3   | ESE-1                | ELF3   | 0.371966  | 22         |
| V\$HNF3B_Q6  | HNF-3beta            | FOXA2  | 0.153113  | 21         |
| V\$CP2_01    | CP2                  | TFCP2  | 0.129278  | 21         |
| V\$GATA2_02  | GATA-2               | GATA2  | 0.161776  | 21         |
| V\$GATA6_01  | GATA-6               | GATA6  | 0.222627  | 21         |

|                |            |       |           |    |
|----------------|------------|-------|-----------|----|
| V\$AML1_Q4     | AML1       | RUNX1 | 0.154739  | 20 |
| V\$STAT3_03    | STAT3      | STAT3 | 0.218242  | 19 |
| V\$GATA2_01    | GATA-2     | GATA2 | 0.161776  | 19 |
| V\$GATA3_02    | GATA-3     | GATA3 | 0.18934   | 16 |
| V\$YY1_Q6_03   | YY1        | YY1   | 0.0158048 | 15 |
| V\$AML2_01     | AML2       | RUNX3 | 0.315324  | 15 |
| V\$ESE1_02     | ESE-1      | ELF3  | 0.371966  | 15 |
| V\$ELF5_01     | ELF5       | ELF5  | 0.270236  | 15 |
| V\$CEBPG_Q6_01 | C/EBPgamma | CEBPG | 0.366348  | 13 |
| V\$CEBPD_Q6    | C/EBPdelta | CEBPD | 0.805267  | 13 |
| V\$CEBPB_Q6    | C/EBPbeta  | CEBPB | 0.631874  | 12 |
| V\$FOXO4_02    | FOXO4      | FOXO4 | 0.247532  | 11 |
| V\$STAT1_05    | STAT1      | STAT1 | 0.146477  | 10 |
| V\$STAT1_Q6    | STAT1      | STAT1 | 0.146477  | 7  |
| V\$IRF7_01     | IRF-7      | IRF7  | 0.436966  | 7  |
| V\$GATA2_03    | GATA-2     | GATA2 | 0.161776  | 6  |
| V\$NUR77_Q5    | NUR77      | NR4A1 | 0.123743  | 5  |
| V\$IRF1_Q6_01  | IRF-1      | IRF1  | 0.227571  | 2  |

hsa-mir-224

| Matrix_id      | transcription factor | Gene  | PCC       | Occurrence |
|----------------|----------------------|-------|-----------|------------|
| V\$PEA3_Q6     | PEA3                 | ETV4  | 0.0725604 | 248        |
| V\$PARP_Q4     | PARP                 | PARP1 | 0.0571376 | 245        |
| V\$ELF1_Q6     | Elf-1                | ELF1  | 0.202112  | 241        |
| V\$P300_01     | p300                 | EP300 | 0.319459  | 227        |
| V\$ETS1_B      | c-Ets-1              | ETS1  | 0.0636973 | 223        |
| V\$CETS1_Q6    | C-ets-1              | ETS1  | 0.0636973 | 218        |
| V\$SMAD4_Q6_01 | Smad4                | SMAD4 | 0.291295  | 215        |
| V\$GABPA_Q4    | GABP-alpha           | GABPA | 0.335774  | 206        |
| V\$TBP_Q6      | TBP                  | TBP   | 0.12449   | 195        |
| V\$TBX5_02     | TBX5                 | TBX5  | 0.0523812 | 194        |
| V\$YY1_01      | YY1                  | YY1   | 0.367911  | 187        |
| V\$DLX5_01     | dlx5                 | DLX5  | 0.663186  | 173        |
| V\$YY1_Q6_02   | YY1                  | YY1   | 0.367911  | 171        |
| V\$YY1_Q6      | YY1                  | YY1   | 0.367911  | 171        |
| V\$GATA1_02    | GATA-1               | GATA1 | 0.0264886 | 168        |
| V\$GATA1_06    | GATA-1               | GATA1 | 0.0264886 | 162        |
| V\$GATA2_02    | GATA-2               | GATA2 | 0.697301  | 162        |
| V\$GATA1_05    | GATA-1               | GATA1 | 0.0264886 | 162        |
| V\$AHR_Q5      | AhR                  | AHR   | 0.968232  | 160        |
| V\$ERBETA_Q5   | ER-beta              | ESR2  | 0.0107349 | 152        |
| V\$PARP_Q3     | PARP                 | PARP1 | 0.0571376 | 151        |

|                |            |        |           |     |
|----------------|------------|--------|-----------|-----|
| V\$GATA1_04    | GATA-1     | GATA1  | 0.0264886 | 142 |
| V\$HMGYIY_01   | HMGYIY     | HMGY1  | 0.335188  | 142 |
| V\$GATA3_02    | GATA-3     | GATA3  | 0.918317  | 139 |
| V\$GATA3_01    | GATA-3     | GATA3  | 0.918317  | 131 |
| V\$YY1_Q6_03   | YY1        | YY1    | 0.367911  | 127 |
| V\$CEBPE_Q6    | CEBPE      | CEBPE  | 0.0507636 | 118 |
| V\$GATA2_01    | GATA-2     | GATA2  | 0.697301  | 118 |
| V\$TCF4_01     | TCF-4      | TCF7L2 | 0.469584  | 116 |
| V\$CEBPA_Q6    | C/EBPalpha | CEBPA  | 0.0611198 | 113 |
| V\$TCF4_Q5     | TCF-4      | TCF7L2 | 0.469584  | 106 |
| V\$PITX2_Q2    | Pitx2      | PITX2  | 0.41153   | 105 |
| V\$FOXJ2_01    | FOXJ2      | FOXJ2  | 0.0260835 | 103 |
| V\$CEBPD_Q6    | C/EBPdelta | CEBPD  | 0.426639  | 93  |
| V\$HBP1_Q2     | hbp1       | HBP1   | 0.649891  | 88  |
| V\$CEBPB_Q2    | C/EBPbeta  | CEBPB  | 0.581277  | 86  |
| V\$CEBPG_Q6_01 | C/EBPgamma | CEBPG  | 0.531679  | 80  |
| V\$GATA2_03    | GATA-2     | GATA2  | 0.697301  | 75  |
| V\$CEBPB_Q6    | C/EBPbeta  | CEBPB  | 0.581277  | 72  |
| V\$YY1_Q2      | YY1        | YY1    | 0.367911  | 71  |
| V\$CEBPA_Q1    | C/EBPalpha | CEBPA  | 0.0611198 | 69  |
| V\$YY1_Q3      | YY1        | YY1    | 0.367911  | 56  |
| V\$IRF1_Q6_01  | IRF-1      | IRF1   | 0.330883  | 47  |
| V\$CEBPG_Q6    | C/EBPgamma | CEBPG  | 0.531679  | 46  |
| V\$CEBPB_Q1    | C/EBPbeta  | CEBPB  | 0.581277  | 44  |
| V\$CDP_Q4      | CDP        | CUX1   | 0.379583  | 36  |
| V\$FOXO4_Q1    | FOXO4      | FOXO4  | 0.957626  | 35  |
| V\$FOXJ2_Q2    | FOXJ2      | FOXJ2  | 0.0260835 | 31  |
| V\$IRF7_Q1     | IRF-7      | IRF7   | 0.157129  | 29  |
| V\$IRF2_Q1     | IRF-2      | IRF2   | 0.087711  | 16  |

hsa-mir-23a

| Matrix_id   | transcription factor | Gene   | PCC       | Occurrence |
|-------------|----------------------|--------|-----------|------------|
| V\$PUR1_Q4  | PUR1                 | PURA   | 0.201518  | 222        |
| V\$PEA3_Q6  | PEA3                 | ETV4   | 0.139465  | 217        |
| V\$PARP_Q4  | PARP                 | PARP1  | 0.0384419 | 214        |
| V\$GKLF_Q4  | GKLF                 | KLF4   | 0.640138  | 211        |
| V\$ELF1_Q6  | Elf-1                | ELF1   | 0.210303  | 210        |
| V\$MAFB_Q1  | MAFB                 | MAFB   | 0.211536  | 206        |
| V\$P300_Q1  | p300                 | EP300  | 0.335915  | 204        |
| V\$ETS1_B   | c-Ets-1              | ETS1   | 0.153788  | 196        |
| V\$CETS1_Q6 | C-ets-1              | ETS1   | 0.153788  | 192        |
| V\$NFAT4_Q3 | NF-AT4               | NFATC3 | 0.0873675 | 185        |



|                |            |        |            |     |
|----------------|------------|--------|------------|-----|
| V\$GATA1_01    | GATA-1     | GATA1  | 0.184953   | 181 |
| V\$ETS2_Q6     | c-Ets-2    | ETS2   | 0.0517497  | 181 |
| V\$GABPA_Q4    | GABP-alpha | GABPA  | 0.174132   | 180 |
| V\$TBX5_02     | TBX5       | TBX5   | 0.132633   | 178 |
| V\$TBP_Q6      | TBP        | TBP    | 0.134487   | 170 |
| V\$YY1_01      | YY1        | YY1    | 0.390864   | 167 |
| V\$ETS2_B      | c-Ets-2    | ETS2   | 0.0517497  | 166 |
| V\$AML1_Q6     | AML1       | RUNX1  | 0.167202   | 161 |
| V\$YY1_Q6      | YY1        | YY1    | 0.390864   | 150 |
| V\$YY1_Q6_02   | YY1        | YY1    | 0.390864   | 150 |
| V\$DLX5_01     | dlx5       | DLX5   | 0.579841   | 149 |
| V\$E12_Q6      | E12        | TCF3   | 0.0360801  | 141 |
| V\$E2A_Q6      | E2A        | TCF3   | 0.0360801  | 141 |
| V\$TBX5_01     | TBX5       | TBX5   | 0.132633   | 140 |
| V\$E47_02      | E47        | TCF3   | 0.0360801  | 139 |
| V\$AP2ALPHA_Q6 | AP-2alpha  | TFAP2A | 0.907529   | 134 |
| V\$IRF4_Q6     | IRF-4      | IRF4   | 0.00040913 | 134 |
| V\$NFAT2_Q5    | NF-AT2     | NFATC1 | 0.00928479 | 125 |
| V\$FKLF_Q5     | FKLF       | KLF11  | 0.213048   | 124 |
| V\$HNF3A_01    | HNF3A      | FOXA1  | 0.0839298  | 124 |
| V\$GATA3_01    | GATA-3     | GATA3  | 0.907516   | 118 |
| V\$HMGIIY_01   | HMGIIY     | HMGA1  | 0.31888    | 118 |
| V\$E2A_Q2      | E2A        | TCF3   | 0.0360801  | 117 |
| V\$FOXO3A_Q1   | FOXO3A     | FOXO3  | 0.0544921  | 116 |
| V\$TFIIQ_Q6    | TFII-Q     | GTF2I  | 0.151168   | 115 |
| V\$SREBP1_Q6   | SREBP-1    | SREBF1 | 0.157358   | 113 |
| V\$TEL1_02     | TEL1       | ETV6   | 0.0455432  | 108 |
| V\$ELK1_02     | Elk-1      | ELK1   | 0.072076   | 108 |
| V\$GATA2_01    | GATA-2     | GATA2  | 0.760531   | 107 |
| V\$YY1_Q6_03   | YY1        | YY1    | 0.390864   | 107 |
| V\$ER71_02     | ER71       | ETV2   | 0.0323767  | 99  |
| V\$ELK1_06     | ELK-1      | ELK1   | 0.072076   | 98  |
| V\$AML1_01     | AML1a      | RUNX1  | 0.167202   | 93  |
| V\$PITX2_Q2    | Pitx2      | PITX2  | 0.459572   | 92  |
| V\$ETV7_01     | ETV7       | ETV7   | 0.00486198 | 92  |
| V\$TCF4_Q5     | TCF-4      | TCF7L2 | 0.486527   | 90  |
| V\$ESE1_Q3     | ESE-1      | ELF3   | 0.204657   | 88  |
| V\$GABPBETA_Q3 | GABP-beta  | GABPB1 | 0.283782   | 87  |
| V\$PITX2_01    | PITX2      | PITX2  | 0.459572   | 87  |
| V\$CREM_Q6     | CREM       | CREM   | 0.138503   | 86  |
| V\$ZABC1_01    | ZABC1      | ZNF217 | 0.831181   | 83  |
| V\$E47_01      | E47        | TCF3   | 0.0360801  | 80  |
| V\$AML1_Q4     | AML1       | RUNX1  | 0.167202   | 79  |
| V\$GATA3_03    | GATA-3     | GATA3  | 0.907516   | 77  |
| V\$ESE1_02     | ESE-1      | ELF3   | 0.204657   | 66  |
| V\$FOXO4_02    | FOXO4      | FOXO4  | 0.898954   | 62  |

|                |            |        |           |    |
|----------------|------------|--------|-----------|----|
| V\$ATF3_Q6_01  | ATF-3      | ATF3   | 0.61725   | 62 |
| V\$ATF1_Q6_01  | ATF-1      | ATF1   | 0.0592608 | 62 |
| V\$SPIB_03     | Spi-B      | SPIB   | 0.0442871 | 59 |
| V\$P53_02      | p53        | TP53   | 0.617343  | 57 |
| V\$PET1_02     | Pet-1      | FEV    | 0.114676  | 56 |
| V\$ERG_03      | ERG        | ERG    | 0.352309  | 52 |
| V\$ERG_01      | ERG        | ERG    | 0.352309  | 33 |
| V\$AP2ALPHA_02 | AP-2alphaA | TFAP2A | 0.907529  | 30 |
| V\$NKX3A_02    | Nkx3A      | NKX3-1 | 0.133344  | 16 |
| V\$P53_04      | p53        | TP53   | 0.617343  | 7  |

hsa-mir-24-1

| Matrix_id      | transcription factor | Gene   | PCC        | Occurrence |
|----------------|----------------------|--------|------------|------------|
| V\$PUR1_Q4     | PUR1                 | PURA   | 0.24931    | 239        |
| V\$PEA3_Q6     | PEA3                 | ETV4   | 0.0994133  | 234        |
| V\$PARP_Q4     | PARP                 | PARP1  | 0.0530058  | 231        |
| V\$ELF1_Q6     | Elf-1                | ELF1   | 0.122152   | 227        |
| V\$GKLF_Q4     | GKLF                 | KLF4   | 0.589086   | 226        |
| V\$MAFB_01     | MAFB                 | MAFB   | 0.253642   | 220        |
| V\$P300_01     | p300                 | EP300  | 0.344535   | 216        |
| V\$CETS1_Q6    | C-ets-1              | ETS1   | 0.207348   | 205        |
| V\$SMAD4_Q6_01 | Smad4                | SMAD4  | 0.380773   | 200        |
| V\$ETS2_Q6     | c-Ets-2              | ETS2   | 0.0294561  | 196        |
| V\$NR1B2_Q6    | NR1B2                | RARB   | 0.0381988  | 195        |
| V\$GABPA_Q4    | GABP-alpha           | GABPA  | 0.283468   | 194        |
| V\$GATA1_01    | GATA-1               | GATA1  | 0.246191   | 194        |
| V\$TBP_Q6      | TBP                  | TBP    | 0.155753   | 183        |
| V\$GR_Q6       | GR                   | NR3C1  | 0.218397   | 183        |
| V\$YY1_01      | YY1                  | YY1    | 0.358358   | 178        |
| V\$AML1_Q6     | AML1                 | RUNX1  | 0.127865   | 172        |
| V\$LRF_Q2      | LRF                  | ZBTB7A | 0.112859   | 169        |
| V\$DLX5_01     | dlx5                 | DLX5   | 0.587562   | 162        |
| V\$YY1_Q6      | YY1                  | YY1    | 0.358358   | 160        |
| V\$YY1_Q6_02   | YY1                  | YY1    | 0.358358   | 160        |
| V\$AHR_Q5      | AhR                  | AHR    | 0.93087    | 152        |
| V\$ERBETA_Q5   | ER-beta              | ESR2   | 0.0241903  | 149        |
| V\$PARP_Q3     | PARP                 | PARP1  | 0.0530058  | 148        |
| V\$E2A_Q6      | E2A                  | TCF3   | 0.00233027 | 146        |
| V\$E12_Q6      | E12                  | TCF3   | 0.00233027 | 146        |
| V\$E47_02      | E47                  | TCF3   | 0.00233027 | 144        |
| V\$ING4_01     | ING4                 | ING4   | 0.0408535  | 144        |
| V\$AP2ALPHA_Q6 | AP-2alpha            | TFAP2A | 0.932552   | 142        |

|                |            |        |            |     |
|----------------|------------|--------|------------|-----|
| V\$SP1_Q6      | Sp1        | SP1    | 0.429211   | 141 |
| V\$HNF3A_01    | HNF3A      | FOXA1  | 0.0379043  | 134 |
| V\$AP2ALPHA_01 | AP-2alpha  | TFAP2A | 0.932552   | 133 |
| V\$SP1_Q6_01   | Sp1        | SP1    | 0.429211   | 129 |
| V\$SP1_Q4_01   | Sp1        | SP1    | 0.429211   | 124 |
| V\$SP1_01      | Sp1        | SP1    | 0.429211   | 121 |
| V\$SP1_Q2_01   | Sp1        | SP1    | 0.429211   | 121 |
| V\$ELK1_02     | Elk-1      | ELK1   | 0.0924981  | 121 |
| V\$TEL1_02     | TEL1       | ETV6   | 0.0306096  | 121 |
| V\$CMAF_01     | c-Maf      | MAF    | 0.113545   | 118 |
| V\$ARNT_01     | Arnt       | ARNT   | 0.394212   | 117 |
| V\$TEF1_Q6_03  | TEF-1      | TEAD1  | 0.0143519  | 115 |
| V\$SP1_02      | SP1        | SP1    | 0.429211   | 114 |
| V\$ER71_02     | ER71       | ETV2   | 0.0794144  | 113 |
| V\$ELK1_06     | ELK-1      | ELK1   | 0.0924981  | 111 |
| V\$CEBPE_Q6    | CEBPE      | CEBPE  | 0.263541   | 109 |
| V\$CEBPA_Q6    | C/EBPalpha | CEBPA  | 0.0119739  | 109 |
| V\$ETV7_01     | ETV7       | ETV7   | 0.00707411 | 105 |
| V\$GFI1B_01    | Gfi1b      | GFI1B  | 0.045916   | 103 |
| V\$AML1_01     | AML1a      | RUNX1  | 0.127865   | 100 |
| V\$PITX2_Q2    | Pitx2      | PITX2  | 0.458122   | 99  |
| V\$ESE1_Q3     | ESE-1      | ELF3   | 0.151935   | 97  |
| V\$AP2GAMMA_01 | AP-2gamma  | TFAP2C | 0.858973   | 96  |
| V\$PITX2_01    | PITX2      | PITX2  | 0.458122   | 96  |
| V\$FOXJ2_01    | FOXJ2      | FOXJ2  | 0.0878174  | 95  |
| V\$ZABC1_01    | ZABC1      | ZNF217 | 0.779205   | 89  |
| V\$GABPBETA_Q3 | GABP-beta  | GABPB1 | 0.283621   | 89  |
| V\$SP2_01      | SP2        | SP2    | 0.268898   | 88  |
| V\$CEBPD_Q6    | C/EBPdelta | CEBPD  | 0.436878   | 86  |
| V\$AML1_Q4     | AML1       | RUNX1  | 0.127865   | 86  |
| V\$GATA3_03    | GATA-3     | GATA3  | 0.857401   | 83  |
| V\$CEBPB_02    | C/EBPbeta  | CEBPB  | 0.572352   | 82  |
| V\$HOXA9_01    | hoxa9      | HOXA9  | 0.0218861  | 76  |
| V\$ESE1_02     | ESE-1      | ELF3   | 0.151935   | 74  |
| V\$LHX3b_01    | LHX3b      | LHX3   | 0.021562   | 70  |
| V\$STAT3_03    | STAT3      | STAT3  | 0.157349   | 68  |
| V\$CEBPA_01    | C/EBPalpha | CEBPA  | 0.0119739  | 67  |
| V\$FOXO4_02    | FOXO4      | FOXO4  | 0.924163   | 65  |
| V\$CEBPB_Q6    | C/EBPbeta  | CEBPB  | 0.572352   | 64  |
| V\$MSX1_01     | Msx-1      | MSX1   | 0.0407685  | 62  |
| V\$PET1_02     | Pet-1      | FEV    | 0.0870979  | 58  |
| V\$ERG_03      | ERG        | ERG    | 0.379452   | 54  |
| V\$CEBPB_01    | C/EBPbeta  | CEBPB  | 0.572352   | 40  |
| V\$PAX3_B      | Pax-3      | PAX3   | 0.116646   | 36  |
| V\$AFP1_Q6     | AFP1       | ZFH3   | 0.274016   | 8   |

hsa-mir-24-2

| Matrix_id      | transcription factor | Gene   | PCC        | Occurrence |
|----------------|----------------------|--------|------------|------------|
| V\$PUR1_Q4     | PUR1                 | PURA   | 0.24931    | 239        |
| V\$PEA3_Q6     | PEA3                 | ETV4   | 0.0994133  | 234        |
| V\$PARP_Q4     | PARP                 | PARP1  | 0.0530058  | 231        |
| V\$ELF1_Q6     | Elf-1                | ELF1   | 0.122152   | 227        |
| V\$GKLF_Q4     | GKLF                 | KLF4   | 0.589086   | 226        |
| V\$MAFB_01     | MAFB                 | MAFB   | 0.253642   | 220        |
| V\$P300_01     | p300                 | EP300  | 0.344535   | 216        |
| V\$ETS1_B      | c-Ets-1              | ETS1   | 0.207348   | 211        |
| V\$CETS1_Q6    | C-ets-1              | ETS1   | 0.207348   | 205        |
| V\$ETS2_Q6     | c-Ets-2              | ETS2   | 0.0294561  | 196        |
| V\$GABPA_Q4    | GABP-alpha           | GABPA  | 0.283468   | 194        |
| V\$GATA1_01    | GATA-1               | GATA1  | 0.246191   | 194        |
| V\$TBX5_02     | TBX5                 | TBX5   | 0.171306   | 187        |
| V\$TBP_Q6      | TBP                  | TBP    | 0.155753   | 183        |
| V\$ETS2_B      | c-Ets-2              | ETS2   | 0.0294561  | 180        |
| V\$YY1_01      | YY1                  | YY1    | 0.358358   | 178        |
| V\$AML1_Q6     | AML1                 | RUNX1  | 0.127865   | 172        |
| V\$DLX5_01     | dlx5                 | DLX5   | 0.587562   | 162        |
| V\$YY1_Q6_02   | YY1                  | YY1    | 0.358358   | 160        |
| V\$YY1_Q6      | YY1                  | YY1    | 0.358358   | 160        |
| V\$TBX5_01     | TBX5                 | TBX5   | 0.171306   | 150        |
| V\$E12_Q6      | E12                  | TCF3   | 0.00233027 | 146        |
| V\$E2A_Q6      | E2A                  | TCF3   | 0.00233027 | 146        |
| V\$ING4_01     | ING4                 | ING4   | 0.0408535  | 144        |
| V\$E47_02      | E47                  | TCF3   | 0.00233027 | 144        |
| V\$AP2ALPHA_Q6 | AP-2alpha            | TFAP2A | 0.932552   | 142        |
| V\$HNF3A_01    | HNF3A                | FOXA1  | 0.0379043  | 134        |
| V\$FKLF_Q5     | FKLF                 | KLF11  | 0.289596   | 131        |
| V\$HMGYIY_01   | HMGYIY               | HMGA1  | 0.249456   | 130        |
| V\$TFIIQ6      | TFII-I               | GTF2I  | 0.178901   | 128        |
| V\$GATA3_01    | GATA-3               | GATA3  | 0.857401   | 124        |
| V\$E2A_Q2      | E2A                  | TCF3   | 0.00233027 | 123        |
| V\$TEL1_02     | TEL1                 | ETV6   | 0.0306096  | 121        |
| V\$SREBP1_Q6   | SREBP-1              | SREBF1 | 0.118821   | 121        |
| V\$ELK1_02     | Elk-1                | ELK1   | 0.0924981  | 121        |
| V\$YY1_Q6_03   | YY1                  | YY1    | 0.358358   | 114        |
| V\$ER71_02     | ER71                 | ETV2   | 0.0794144  | 113        |
| V\$ELK1_06     | ELK-1                | ELK1   | 0.0924981  | 111        |
| V\$GATA2_01    | GATA-2               | GATA2  | 0.753068   | 111        |
| V\$ETV7_01     | ETV7                 | ETV7   | 0.00707411 | 105        |

|                |            |        |            |     |
|----------------|------------|--------|------------|-----|
| V\$AML1_Q1     | AML1a      | RUNX1  | 0.127865   | 100 |
| V\$PITX2_Q2    | Pitx2      | PITX2  | 0.458122   | 99  |
| V\$ESE1_Q3     | ESE-1      | ELF3   | 0.151935   | 97  |
| V\$PITX2_Q1    | PITX2      | PITX2  | 0.458122   | 96  |
| V\$TCF4_Q5     | TCF-4      | TCF7L2 | 0.481077   | 95  |
| V\$CREM_Q6     | CREM       | CREM   | 0.148719   | 90  |
| V\$GABPBETA_Q3 | GABP-beta  | GABPB1 | 0.283621   | 89  |
| V\$ZABC1_Q1    | ZABC1      | ZNF217 | 0.779205   | 89  |
| V\$AML1_Q4     | AML1       | RUNX1  | 0.127865   | 86  |
| V\$GATA3_Q3    | GATA-3     | GATA3  | 0.857401   | 83  |
| V\$E47_Q1      | E47        | TCF3   | 0.00233027 | 81  |
| V\$ESE1_Q2     | ESE-1      | ELF3   | 0.151935   | 74  |
| V\$FOXO4_Q2    | FOXO4      | FOXO4  | 0.924163   | 65  |
| V\$ATF1_Q6_Q1  | ATF-1      | ATF1   | 0.0803885  | 64  |
| V\$MSX1_Q1     | Msx-1      | MSX1   | 0.0407685  | 62  |
| V\$ATF3_Q6_Q1  | ATF-3      | ATF3   | 0.612585   | 61  |
| V\$SPIB_Q3     | Spi-B      | SPIB   | 0.0607785  | 61  |
| V\$P53_Q2      | p53        | TP53   | 0.546691   | 60  |
| V\$PET1_Q2     | Pet-1      | FEV    | 0.0870979  | 58  |
| V\$ERG_Q3      | ERG        | ERG    | 0.379452   | 54  |
| V\$ERG_Q1      | ERG        | ERG    | 0.379452   | 35  |
| V\$AP2ALPHA_Q2 | AP-2alphaA | TFAP2A | 0.932552   | 33  |
| V\$NKX3A_Q2    | Nkx3A      | NKX3-1 | 0.0742997  | 16  |
| V\$P53_Q4      | p53        | TP53   | 0.546691   | 7   |

hsa-mir-26a-1

| Matrix_id      | transcription factor | Gene     | PCC       | Occurrence |
|----------------|----------------------|----------|-----------|------------|
| V\$PUR1_Q4     | PUR1                 | PURA     | 0.563907  | 16         |
| V\$P300_Q1     | p300                 | EP300    | 0.11525   | 15         |
| V\$ETS2_Q6     | c-Ets-2              | ETS2     | 0.117818  | 15         |
| V\$SMAD4_Q6_Q1 | Smad4                | SMAD4    | 0.421393  | 15         |
| V\$GKLF_Q4     | GKLF                 | KLF4     | 0.236903  | 15         |
| V\$SMAD3_Q6_Q1 | Smad3                | SMAD3    | 0.0341764 | 13         |
| V\$AP4_Q6_Q2   | AP-4                 | TFAP4    | 0.197706  | 12         |
| V\$MEF2C_Q4    | MEF-2C               | MEF2C    | 0.0954616 | 12         |
| V\$GATA1_Q1    | GATA-1               | GATA1    | 0.0821563 | 11         |
| V\$BEN_Q1      | BEN                  | GTF2IRD1 | 0.030314  | 10         |
| V\$TFII_Q6     | TFII-I               | GTF2I    | 0.156115  | 9          |
| V\$ZBP89_Q4    | ZBP89                | ZNF148   | 0.357365  | 8          |
| V\$WT1_Q6      | WT1                  | WT1      | 0.571403  | 8          |
| V\$EHF_Q3      | EHF                  | EHF      | 0.0325475 | 7          |
| V\$SREBP1_Q6   | SREBP-1              | SREBF1   | 0.0254278 | 7          |

|                     |                      |               |           |   |
|---------------------|----------------------|---------------|-----------|---|
| V\$SP1_Q4_01        | Sp1                  | SP1           | 0.031628  | 6 |
| V\$WT1_Q6_01        | WT1                  | WT1           | 0.571403  | 6 |
| V\$SP1_Q6           | Sp1                  | SP1           | 0.031628  | 6 |
| V\$HIF1A_Q6         | HIF-1alpha           | HIF1A         | 0.433227  | 6 |
| V\$ARNT_01          | Arnt                 | ARNT          | 0.120178  | 6 |
| V\$FKLF_Q5          | FKLF                 | KLF11         | 0.0902283 | 6 |
| V\$CREM_Q6          | CREM                 | CREM          | 0.0974006 | 6 |
| V\$SP1_Q2_01        | Sp1                  | SP1           | 0.031628  | 6 |
| V\$SP1_Q2           | SP1                  | SP1           | 0.031628  | 6 |
| V\$SP1_Q6_01        | Sp1                  | SP1           | 0.031628  | 6 |
| V\$ZFX_Q1           | Zfx                  | ZFX           | 0.157093  | 5 |
| V\$GABPBETA_Q3      | GABP-beta            | GABPB1        | 0.535031  | 5 |
| V\$AP2ALPHA_Q6      | AP-2alpha            | TFAP2A        | 0.0853216 | 5 |
| V\$CACCCBINDINGFACT | CACCC-binding factor | ZNF148        | 0.357365  | 4 |
| V\$AP2GAMMA_Q1      | AP-2gamma            | TFAP2C        | 0.188662  | 4 |
| V\$AP2ALPHA_Q1      | AP-2alpha            | TFAP2A        | 0.0853216 | 3 |
| V\$EGR1_Q2          | EGR-1                | EGR1          | 0.0478022 | 3 |
| V\$SREBP1_Q2        | SREBP-1              | SREBF1        | 0.0254278 | 3 |
| V\$DEC2_Q2          |                      | 2-Dec BHLHE41 | 0.323923  | 3 |
| V\$ATF1_Q6_01       | ATF-1                | ATF1          | 0.540648  | 2 |
| V\$MTF1_Q4          | MTF-1                | MTF1          | 0.0140442 | 2 |
| V\$ATF6_Q1          | ATF6                 | ATF6          | 0.0363864 | 2 |
| V\$PAX3_Q1          | Pax-3                | PAX3          | 0.0816502 | 1 |
| V\$CTCF_Q1          | CTCF                 | CTCF          | 0.128407  | 1 |
| V\$CTCF_Q2          | CTCF                 | CTCF          | 0.128407  | 1 |

hsa-mir-26a-2

| Matrix_id      | transcription factor | Gene  | PCC       | Occurrence |
|----------------|----------------------|-------|-----------|------------|
| V\$PUR1_Q4     | PUR1                 | PURA  | 0.563907  | 16         |
| V\$P300_Q1     | p300                 | EP300 | 0.11525   | 15         |
| V\$SMAD4_Q6_Q1 | Smad4                | SMAD4 | 0.421393  | 15         |
| V\$GATA1_Q5    | GATA-1               | GATA1 | 0.0821563 | 14         |
| V\$GATA2_Q2    | GATA-2               | GATA2 | 0.380356  | 14         |
| V\$NANOG_Q2    | Nanog                | NANOG | 0.0279849 | 14         |
| V\$GATA1_Q6    | GATA-1               | GATA1 | 0.0821563 | 14         |
| V\$GATA6_Q1    | GATA-6               | GATA6 | 0.0993605 | 14         |
| V\$YY1_Q1      | YY1                  | YY1   | 0.370567  | 13         |
| V\$SMAD3_Q6_Q1 | Smad3                | SMAD3 | 0.0341764 | 13         |
| V\$SR_Y2       | SR_Y                 | SR_Y  | 0.365856  | 13         |
| V\$GATA3_Q2    | GATA-3               | GATA3 | 0.0594854 | 12         |
| V\$ETS2_B      | c-Ets-2              | ETS2  | 0.117818  | 12         |
| V\$GR_Q6       | GR                   | NR3C1 | 0.478103  | 12         |

|               |            |        |            |    |
|---------------|------------|--------|------------|----|
| V\$AP4_Q6_02  | AP-4       | TFAP4  | 0.197706   | 12 |
| V\$TTF1_Q5    | TTF-1      | NKX2-1 | 0.102028   | 12 |
| V\$HNF3A_01   | HNF3A      | FOXA1  | 0.206352   | 11 |
| V\$GATA1_01   | GATA-1     | GATA1  | 0.0821563  | 11 |
| V\$FOXJ2_01   | FOXJ2      | FOXJ2  | 0.00835808 | 11 |
| V\$FOXO3A_Q1  | FOXO3A     | FOXO3  | 0.166433   | 11 |
| V\$YY1_Q6     | YY1        | YY1    | 0.370567   | 11 |
| V\$YY1_Q6_02  | YY1        | YY1    | 0.370567   | 10 |
| V\$PITX2_Q2   | Pitx2      | PITX2  | 0.0960251  | 9  |
| V\$PITX2_01   | PITX2      | PITX2  | 0.0960251  | 9  |
| V\$HOXD9_Q2   | Hoxd9      | HOXD9  | 0.180937   | 9  |
| V\$HOXA9_01   | hoxa9      | HOXA9  | 0.316058   | 9  |
| V\$TCF4_01    | TCF-4      | TCF7L2 | 0.611655   | 9  |
| V\$GATA3_01   | GATA-3     | GATA3  | 0.0594854  | 9  |
| V\$YY1_Q6_03  | YY1        | YY1    | 0.370567   | 9  |
| V\$GR_01      | GR         | NR3C1  | 0.478103   | 8  |
| V\$PBX1_Q3    | Pbx1       | PBX1   | 0.866374   | 8  |
| V\$TCF4_Q5    | TCF-4      | TCF7L2 | 0.611655   | 8  |
| V\$CMAF_01    | c-Maf      | MAF    | 0.237521   | 8  |
| V\$SP1_01     | Sp1        | SP1    | 0.031628   | 7  |
| V\$MITF_Q6    | MITF       | MITF   | 0.463916   | 7  |
| V\$FAC1_01    | FAC1       | BPTF   | 0.590496   | 7  |
| V\$BCL6_Q3_01 | Bcl-6      | BCL6   | 0.0362302  | 7  |
| V\$DBP_Q6_01  | DBP        | DBP    | 0.0787586  | 6  |
| V\$AP4_Q5     | AP-4       | TFAP4  | 0.197706   | 6  |
| V\$TEF1_Q6_03 | TEF-1      | TEAD1  | 0.00248875 | 6  |
| V\$GATA2_01   | GATA-2     | GATA2  | 0.380356   | 6  |
| V\$SP1_Q6     | Sp1        | SP1    | 0.031628   | 6  |
| V\$HOX13_02   | HOXA5      | HOXA5  | 0.119913   | 6  |
| V\$CEBPD_Q6   | C/EBPdelta | CEBPD  | 0.11041    | 6  |
| V\$TEF1_Q6    | TEF-1      | TEAD1  | 0.00248875 | 6  |
| V\$SP1_Q6_01  | Sp1        | SP1    | 0.031628   | 6  |
| V\$SP1_Q4_01  | Sp1        | SP1    | 0.031628   | 6  |
| V\$SP1_Q2_01  | Sp1        | SP1    | 0.031628   | 6  |
| V\$GATA3_03   | GATA-3     | GATA3  | 0.0594854  | 6  |
| V\$SP1_02     | SP1        | SP1    | 0.031628   | 6  |
| V\$FOXO4_02   | FOXO4      | FOXO4  | 0.0164455  | 6  |
| V\$GATA2_03   | GATA-2     | GATA2  | 0.380356   | 5  |
| V\$AP4_Q6     | AP-4       | TFAP4  | 0.197706   | 5  |
| V\$FOXO4_01   | FOXO4      | FOXO4  | 0.0164455  | 3  |
| V\$AP4_Q6_01  | AP-4       | TFAP4  | 0.197706   | 3  |

---

hsa-mir-26b

---

| Matrix_id      | transcription factor | Gene   | PCC       | Occurrence |
|----------------|----------------------|--------|-----------|------------|
| V\$PUR1_Q4     | PUR1                 | PURA   | 0.37632   | 113        |
| V\$ELF1_Q6     | Elf-1                | ELF1   | 0.261652  | 107        |
| V\$GKLF_Q4     | GKLF                 | KLF4   | 0.58038   | 105        |
| V\$P300_01     | p300                 | EP300  | 0.285296  | 104        |
| V\$MAFB_01     | MAFB                 | MAFB   | 0.320268  | 101        |
| V\$ETS1_B      | c-Ets-1              | ETS1   | 0.0232732 | 99         |
| V\$SMAD4_Q6_01 | Smad4                | SMAD4  | 0.422451  | 96         |
| V\$CETS1_Q6    | C-ets-1              | ETS1   | 0.0232732 | 95         |
| V\$GABPA_Q4    | GABP-alpha           | GABPA  | 0.193552  | 90         |
| V\$GATA1_01    | GATA-1               | GATA1  | 0.121132  | 89         |
| V\$TTF1_Q5     | TTF-1                | NKX2-1 | 0.0454847 | 83         |
| V\$YY1_Q6_02   | YY1                  | YY1    | 0.469256  | 80         |
| V\$YY1_Q6      | YY1                  | YY1    | 0.469256  | 78         |
| V\$GATA1_02    | GATA-1               | GATA1  | 0.121132  | 76         |
| V\$WT1_Q6      | WT1                  | WT1    | 0.156484  | 72         |
| V\$GATA2_02    | GATA-2               | GATA2  | 0.739507  | 72         |
| V\$GATA1_06    | GATA-1               | GATA1  | 0.121132  | 72         |
| V\$GATA1_05    | GATA-1               | GATA1  | 0.121132  | 72         |
| V\$SP1_Q6      | Sp1                  | SP1    | 0.247414  | 69         |
| V\$AHR_Q5      | AhR                  | AHR    | 0.887024  | 69         |
| V\$AP2ALPHA_Q6 | AP-2alpha            | TFAP2A | 0.774806  | 66         |
| V\$TFIIQ6      | TFII-I               | GTF2I  | 0.110465  | 65         |
| V\$FKLF_Q5     | FKLF                 | KLF11  | 0.272347  | 64         |
| V\$SP1_Q6_01   | Sp1                  | SP1    | 0.247414  | 63         |
| V\$CMF01       | c-Maf                | MAF    | 0.267866  | 63         |
| V\$GATA1_04    | GATA-1               | GATA1  | 0.121132  | 60         |
| V\$SP1_Q4_01   | Sp1                  | SP1    | 0.247414  | 60         |
| V\$AP2ALPHA_01 | AP-2alpha            | TFAP2A | 0.774806  | 60         |
| V\$SP1_Q2_01   | Sp1                  | SP1    | 0.247414  | 59         |
| V\$HIF1A_Q6    | HIF-1alpha           | HIF1A  | 0.115015  | 58         |
| V\$ARNT_01     | Arnt                 | ARNT   | 0.270966  | 58         |
| V\$YY1_Q6_03   | YY1                  | YY1    | 0.469256  | 57         |
| V\$SP1_01      | Sp1                  | SP1    | 0.247414  | 56         |
| V\$SP1_02      | SP1                  | SP1    | 0.247414  | 56         |
| V\$WT1_Q6_01   | WT1                  | WT1    | 0.156484  | 56         |
| V\$GATA3_02    | GATA-3               | GATA3  | 0.749806  | 56         |
| V\$SREBP1_Q6   | SREBP-1              | SREBF1 | 0.130423  | 55         |
| V\$CP2_01      | CP2                  | TFCP2  | 0.341041  | 54         |
| V\$STAT3_03    | STAT3                | STAT3  | 0.0259077 | 40         |
| V\$CNOT3_01    | CNOT3                | CNOT3  | 0.0563983 | 38         |
| V\$ZABC1_01    | ZABC1                | ZNF217 | 0.722526  | 37         |
| V\$GATA2_03    | GATA-2               | GATA2  | 0.739507  | 34         |
| V\$YY1_02      | YY1                  | YY1    | 0.469256  | 34         |
| V\$EAR2_Q2     | EAR2                 | NR2F6  | 0.28209   | 34         |



|                |            |        |          |    |
|----------------|------------|--------|----------|----|
| V\$YY1_03      | YY1        | YY1    | 0.469256 | 31 |
| V\$PDEF_02     | PDEF       | SPDEF  | 0.251218 | 28 |
| V\$CEBPG_Q6    | C/EBPgamma | CEBPG  | 0.340389 | 19 |
| V\$SP3_Q3      | Sp3        | SP3    | 0.629746 | 17 |
| V\$ERM_02      | Erm        | ETV5   | 0.245617 | 15 |
| V\$AP2ALPHA_02 | AP-2alphaA | TFAP2A | 0.774806 | 8  |
| V\$AP2ALPHA_03 | AP-2alphaA | TFAP2A | 0.774806 | 3  |

hsa-mir-27a

| Matrix_id     | transcription factor | Gene   | PCC       | Occurrence |
|---------------|----------------------|--------|-----------|------------|
| V\$PUR1_Q4    | PUR1                 | PURA   | 0.242899  | 287        |
| V\$PEA3_Q6    | PEA3                 | ETV4   | 0.247266  | 280        |
| V\$PARP_Q4    | PARP                 | PARP1  | 0.170886  | 275        |
| V\$ELF1_Q6    | Elf-1                | ELF1   | 0.117852  | 273        |
| V\$GKLF_Q4    | GKLF                 | KLF4   | 0.619513  | 270        |
| V\$AP2REP_01  | AP-2rep              | KLF12  | 0.081282  | 269        |
| V\$MAFB_01    | MAFB                 | MAFB   | 0.282625  | 266        |
| V\$P300_01    | p300                 | EP300  | 0.48754   | 259        |
| V\$ETS1_B     | c-Ets-1              | ETS1   | 0.191012  | 255        |
| V\$CETS1_Q6   | C-ets-1              | ETS1   | 0.191012  | 245        |
| V\$NFAT4_Q3   | NF-AT4               | NFATC3 | 0.0538092 | 241        |
| V\$GABPA_Q4   | GABP-alpha           | GABPA  | 0.347079  | 233        |
| V\$ETS2_Q6    | c-Ets-2              | ETS2   | 0.125731  | 231        |
| V\$GATA1_01   | GATA-1               | GATA1  | 0.207548  | 229        |
| V\$TBX5_02    | TBX5                 | TBX5   | 0.249495  | 225        |
| V\$TBP_Q6     | TBP                  | TBP    | 0.19432   | 221        |
| V\$CDX2_Q5_02 | CDX-2                | CDX2   | 0.0485701 | 221        |
| V\$ETS2_B     | c-Ets-2              | ETS2   | 0.125731  | 218        |
| V\$YY1_01     | YY1                  | YY1    | 0.454413  | 217        |
| V\$NANOG_02   | Nanog                | NANOG  | 0.0664269 | 209        |
| V\$AML1_Q6    | AML1                 | RUNX1  | 0.205498  | 209        |
| V\$YY1_Q6     | YY1                  | YY1    | 0.454413  | 196        |
| V\$YY1_Q6_02  | YY1                  | YY1    | 0.454413  | 195        |
| V\$DLX5_01    | dlx5                 | DLX5   | 0.644187  | 194        |
| V\$IPF1_01    | IPF1                 | PDX1   | 0.0996363 | 184        |
| V\$TBX5_01    | TBX5                 | TBX5   | 0.249495  | 182        |
| V\$E12_Q6     | E12                  | TCF3   | 0.0988569 | 176        |
| V\$E2A_Q6     | E2A                  | TCF3   | 0.0988569 | 176        |
| V\$ING4_01    | ING4                 | ING4   | 0.0380184 | 174        |
| V\$E47_02     | E47                  | TCF3   | 0.0988569 | 174        |
| V\$MYOD_Q6_01 | MyoD                 | MYOD1  | 8.91E-05  | 174        |
| V\$IRF4_Q6    | IRF-4                | IRF4   | 0.120039  | 172        |

|                |            |        |           |     |
|----------------|------------|--------|-----------|-----|
| V\$AP2ALPHA_Q6 | AP-2alpha  | TFAP2A | 0.956865  | 168 |
| V\$CDX2_01     | Cdx-2      | CDX2   | 0.0485701 | 164 |
| V\$HNF3A_01    | HNF3A      | FOXA1  | 0.0591774 | 163 |
| V\$MYOGENIN_Q6 | myogenin   | MYOG   | 0.0578974 | 161 |
| V\$FKLF_Q5     | FKLF       | KLF11  | 0.293623  | 159 |
| V\$NFAT2_Q5    | NF-AT2     | NFATC1 | 0.103893  | 157 |
| V\$HMGY1_Q1    | HMGY1      | HMGY1  | 0.293527  | 155 |
| V\$FOXO3A_Q1   | FOXO3A     | FOXO3  | 0.0882284 | 155 |
| V\$GATA3_Q1    | GATA-3     | GATA3  | 0.880875  | 153 |
| V\$TFII1_Q6    | TFII-1     | GTF2I  | 0.226698  | 150 |
| V\$E2A_Q2      | E2A        | TCF3   | 0.0988569 | 148 |
| V\$TEL1_Q2     | TEL1       | ETV6   | 0.158641  | 147 |
| V\$ELK1_Q2     | Elk-1      | ELK1   | 0.184386  | 147 |
| V\$SREBP1_Q6   | SREBP-1    | SREBF1 | 0.173941  | 144 |
| V\$YY1_Q6_Q3   | YY1        | YY1    | 0.454413  | 141 |
| V\$ER71_Q2     | ER71       | ETV2   | 0.0488207 | 139 |
| V\$GATA2_Q1    | GATA-2     | GATA2  | 0.799861  | 139 |
| V\$ELK1_Q6     | ELK-1      | ELK1   | 0.184386  | 135 |
| V\$CRX_Q4      | Crx        | CRX    | 0.0384555 | 135 |
| V\$ETV7_Q1     | ETV7       | ETV7   | 0.136813  | 127 |
| V\$PITX2_Q2    | Pitx2      | PITX2  | 0.566223  | 123 |
| V\$ESE1_Q3     | ESE-1      | ELF3   | 0.162555  | 117 |
| V\$TCF4_Q5     | TCF-4      | TCF7L2 | 0.488612  | 116 |
| V\$AML1_Q1     | AML1a      | RUNX1  | 0.205498  | 116 |
| V\$RFX1_Q2     | RFX1       | RFX1   | 0.0865738 | 116 |
| V\$PITX2_Q1    | PITX2      | PITX2  | 0.566223  | 116 |
| V\$PITX1_Q1    | Pitx1      | PITX1  | 0.0675662 | 115 |
| V\$GABPBETA_Q3 | GABP-beta  | GABPB1 | 0.380156  | 110 |
| V\$ZABC1_Q1    | ZABC1      | ZNF217 | 0.830616  | 109 |
| V\$CREM_Q6     | CREM       | CREM   | 0.252268  | 108 |
| V\$MYOD_Q6     | MyoD       | MYOD1  | 8.91E-05  | 106 |
| V\$RFX1_Q1     | RFX1       | RFX1   | 0.0865738 | 105 |
| V\$CRX_Q2      | Crx        | CRX    | 0.0384555 | 102 |
| V\$AML1_Q4     | AML1       | RUNX1  | 0.205498  | 100 |
| V\$E47_Q1      | E47        | TCF3   | 0.0988569 | 99  |
| V\$GATA3_Q3    | GATA-3     | GATA3  | 0.880875  | 94  |
| V\$ESE1_Q2     | ESE-1      | ELF3   | 0.162555  | 88  |
| V\$ATF1_Q6_Q1  | ATF-1      | ATF1   | 0.17353   | 80  |
| V\$FOXO4_Q2    | FOXO4      | FOXO4  | 0.94623   | 78  |
| V\$P53_Q2      | p53        | TP53   | 0.62493   | 76  |
| V\$MSX1_Q1     | Msx-1      | MSX1   | 0.0701105 | 74  |
| V\$ATF3_Q6_Q1  | ATF-3      | ATF3   | 0.676997  | 72  |
| V\$SPIB_Q3     | Spi-B      | SPIB   | 0.0501615 | 70  |
| V\$PET1_Q2     | Pet-1      | FEV    | 0.103829  | 69  |
| V\$ERG_Q3      | ERG        | ERG    | 0.482871  | 65  |
| V\$AP2ALPHA_Q2 | AP-2alphaA | TFAP2A | 0.956865  | 43  |

|             |       |        |           |    |
|-------------|-------|--------|-----------|----|
| V\$ERG_01   | ERG   | ERG    | 0.482871  | 42 |
| V\$BACH2_01 | Bach2 | BACH2  | 0.0367081 | 23 |
| V\$NKX3A_02 | Nkx3A | NKX3-1 | 0.0355355 | 17 |
| V\$P53_04   | p53   | TP53   | 0.62493   | 7  |

hsa-mir-27b

| Matrix_id      | transcription factor | Gene   | PCC        | Occurrence |
|----------------|----------------------|--------|------------|------------|
| V\$AML1_01     | AML1a                | RUNX1  | 0.135358   | 2          |
| V\$SOX9_Q4     | SOX9                 | SOX9   | 0.140409   | 2          |
| V\$HNF3A_01    | HNF3A                | FOXA1  | 0.393584   | 2          |
| V\$AML1_Q6     | AML1                 | RUNX1  | 0.135358   | 2          |
| V\$MAFB_01     | MAFB                 | MAFB   | 0.0204788  | 2          |
| V\$LHX3b_01    | LHX3b                | LHX3   | 0.124667   | 2          |
| V\$ETS2_Q6     | c-Ets-2              | ETS2   | 0.00948282 | 2          |
| V\$ELF1_Q6     | Elf-1                | ELF1   | 0.010526   | 2          |
| V\$LRF_Q2      | LRF                  | ZBTB7A | 0.204395   | 2          |
| V\$SMAD4_Q6_01 | Smad4                | SMAD4  | 0.252422   | 2          |
| V\$IRF4_Q6     | IRF-4                | IRF4   | 0.00665002 | 2          |
| V\$CMAF_01     | c-Maf                | MAF    | 0.117095   | 2          |
| V\$DBP_Q6_01   | DBP                  | DBP    | 0.0172768  | 2          |
| V\$CETS1_Q6    | C-ets-1              | ETS1   | 0.376091   | 2          |
| V\$HOXD9_Q2    | Hoxd9                | HOXD9  | 0.246169   | 2          |
| V\$AP4_Q6_02   | AP-4                 | TFAP4  | 0.119728   | 2          |
| V\$GKLF_Q4     | GKLF                 | KLF4   | 0.183853   | 2          |
| V\$AML2_01     | AML2                 | RUNX3  | 0.0202897  | 2          |
| V\$TBP_Q6      | TBP                  | TBP    | 0.00279141 | 2          |
| V\$AML1_Q4     | AML1                 | RUNX1  | 0.135358   | 2          |
| V\$P300_01     | p300                 | EP300  | 0.00860273 | 2          |
| V\$PUR1_Q4     | PUR1                 | PURA   | 0.468624   | 2          |
| V\$YY1_01      | YY1                  | YY1    | 0.120744   | 2          |
| V\$GATA1_01    | GATA-1               | GATA1  | 0.536762   | 2          |
| V\$ZABC1_01    | ZABC1                | ZNF217 | 0.0450992  | 2          |
| V\$CEBPB_02    | C/EBPbeta            | CEBPB  | 0.0410464  | 2          |
| V\$SRY_02      | SRY                  | SRY    | 0.0171504  | 2          |
| V\$GR_Q6       | GR                   | NR3C1  | 0.212841   | 2          |
| V\$NR1B2_Q6    | NR1B2                | RARB   | 0.19589    | 2          |
| V\$NCX_02      | Ncx                  | TLX2   | 0.0532897  | 2          |
| V\$DLX5_01     | dlx5                 | DLX5   | 0.00596605 | 2          |
| V\$HNF1_02     | HNF-1alpha           | HNF1A  | 0.0988846  | 2          |
| V\$HOXA9_01    | hoxa9                | HOXA9  | 0.195387   | 2          |
| V\$MSX1_01     | Msx-1                | MSX1   | 0.128457   | 2          |
| V\$SOX9_B1     | SOX9                 | SOX9   | 0.140409   | 2          |

|                |            |        |            |   |
|----------------|------------|--------|------------|---|
| V\$SP2_01      | SP2        | SP2    | 0.227525   | 1 |
| V\$ETV3_02     | ETV3       | ETV3   | 0.208496   | 1 |
| V\$AP2ALPHA_Q6 | AP-2alpha  | TFAP2A | 0.285761   | 1 |
| V\$PET1_02     | Pet-1      | FEV    | 0.506882   | 1 |
| V\$ER71_02     | ER71       | ETV2   | 0.48211    | 1 |
| V\$EHF_03      | EHF        | EHF    | 0.00902817 | 1 |
| V\$ERG_03      | ERG        | ERG    | 0.108289   | 1 |
| V\$ERF_02      | ERF        | ERF    | 0.184299   | 1 |
| V\$ELK1_06     | ELK-1      | ELK1   | 0.142603   | 1 |
| V\$Elf5_03     | ELF5       | ELF5   | 0.170086   | 1 |
| V\$ESE1_02     | ESE-1      | ELF3   | 0.178331   | 1 |
| V\$SP1_Q6      | Sp1        | SP1    | 0.170955   | 1 |
| V\$MEF2A_Q6    | mef2A      | MEF2A  | 0.174419   | 1 |
| V\$HNF4A_Q6_01 | HNF-4alpha | HNF4A  | 0.0999134  | 1 |
| V\$CEBPB_Q6    | C/EBPbeta  | CEBPB  | 0.0410464  | 1 |
| V\$WT1_Q6_01   | WT1        | WT1    | 0.0208458  | 1 |
| V\$GABPBETA_Q3 | GABP-beta  | GABPB1 | 0.19321    | 1 |
| V\$CEBPE_Q6    | CEBPE      | CEBPE  | 0.544254   | 1 |
| V\$MITF_Q6     | MITF       | MITF   | 0.198124   | 1 |
| V\$HOXB8_01    | HOXB8      | HOXB8  | 0.272232   | 1 |
| V\$PITX2_Q2    | Pitx2      | PITX2  | 0.131238   | 1 |
| V\$FOXO4_02    | FOXO4      | FOXO4  | 0.269493   | 1 |
| V\$AP2GAMMA_01 | AP-2gamma  | TFAP2C | 0.26768    | 1 |
| V\$AP2ALPHA_01 | AP-2alpha  | TFAP2A | 0.285761   | 1 |
| V\$ZIC3_01     | Zic3       | ZIC3   | 0.140012   | 1 |
| V\$E2F1_Q6     | E2F-1      | E2F1   | 0.0428963  | 1 |
| V\$E2F1_Q3     | E2F-1      | E2F1   | 0.0428963  | 1 |
| V\$GATA3_03    | GATA-3     | GATA3  | 0.225892   | 1 |
| V\$PAX3_B      | Pax-3      | PAX3   | 0.334385   | 1 |
| V\$ARNT_01     | Arnt       | ARNT   | 0.153176   | 1 |
| V\$CEBPB_01    | C/EBPbeta  | CEBPB  | 0.0410464  | 1 |
| V\$CREL_01     | c-Rel      | REL    | 0.171588   | 1 |
| V\$ELK1_02     | Elk-1      | ELK1   | 0.142603   | 1 |
| V\$AFP1_Q6     | AFP1       | ZFH3   | 0.518302   | 1 |
| V\$CEBPD_Q6    | C/EBPdelta | CEBPD  | 0.0145005  | 1 |
| V\$PITX2_01    | PITX2      | PITX2  | 0.131238   | 1 |
| V\$SP1_02      | SP1        | SP1    | 0.170955   | 1 |
| V\$ESE1_Q3     | ESE-1      | ELF3   | 0.178331   | 1 |
| V\$GFI1B_01    | Gfi1b      | GFI1B  | 0.0349115  | 1 |
| V\$YY1_Q6_02   | YY1        | YY1    | 0.120744   | 1 |
| V\$E2F1_Q6_01  | E2F-1      | E2F1   | 0.0428963  | 1 |
| V\$E2F1_Q3_01  | E2F-1      | E2F1   | 0.0428963  | 1 |
| V\$SP1_Q2_01   | Sp1        | SP1    | 0.170955   | 1 |
| V\$SP1_Q4_01   | Sp1        | SP1    | 0.170955   | 1 |
| V\$SP1_Q6_01   | Sp1        | SP1    | 0.170955   | 1 |
| V\$PIT1_Q6     | Pit-1      | POU1F1 | 0.174473   | 1 |

|           |     |     |          |   |
|-----------|-----|-----|----------|---|
| V\$YY1_Q6 | YY1 | YY1 | 0.120744 | 1 |
| V\$AHR_Q5 | AhR | AHR | 0.279422 | 1 |
| V\$SP1_01 | Sp1 | SP1 | 0.170955 | 1 |

hsa-mir-28

| Matrix_id      | transcription factor | Gene     | PCC       | Occurrence |
|----------------|----------------------|----------|-----------|------------|
| V\$PEA3_Q6     | PEA3                 | ETV4     | 0.0750412 | 32         |
| V\$AP2REP_01   | AP-2rep              | KLF12    | 0.0210687 | 32         |
| V\$PUR1_Q4     | PUR1                 | PURA     | 0.448339  | 32         |
| V\$P300_01     | p300                 | EP300    | 0.142309  | 31         |
| V\$CDX2_Q5_02  | CDX-2                | CDX2     | 0.0612535 | 30         |
| V\$GKLF_Q4     | GKLF                 | KLF4     | 0.113233  | 30         |
| V\$IK_Q5       | Ikaros               | IKZF1    | 0.0248169 | 30         |
| V\$ELF1_Q6     | Elf-1                | ELF1     | 0.255297  | 29         |
| V\$CMYB_Q5     | c-Myb                | MYB      | 0.0516481 | 28         |
| V\$SOX9_B1     | SOX9                 | SOX9     | 0.141987  | 28         |
| V\$MYB_Q6      | c-Myb                | MYB      | 0.0516481 | 28         |
| V\$SMAD4_Q6_01 | Smad4                | SMAD4    | 0.321432  | 28         |
| V\$NFAT4_Q3    | NF-AT4               | NFATC3   | 0.129362  | 28         |
| V\$SOX9_Q4     | SOX9                 | SOX9     | 0.141987  | 27         |
| V\$YY1_01      | YY1                  | YY1      | 0.334341  | 27         |
| V\$Elf5_03     | ELF5                 | ELF5     | 0.0236042 | 26         |
| V\$NANOG_02    | Nanog                | NANOG    | 0.138445  | 26         |
| V\$IPF1_01     | IPF1                 | PDX1     | 0.113036  | 26         |
| V\$CETS1_Q6    | C-ets-1              | ETS1     | 0.255039  | 26         |
| V\$ETS2_Q6     | c-Ets-2              | ETS2     | 0.131472  | 26         |
| V\$SMAD3_Q6_01 | Smad3                | SMAD3    | 0.0826761 | 25         |
| V\$SRY_02      | SRY                  | SRY      | 0.0966829 | 24         |
| V\$BEN_01      | BEN                  | GTF2IRD1 | 0.134535  | 23         |
| V\$TBX5_02     | TBX5                 | TBX5     | 0.113131  | 23         |
| V\$CDX2_Q5_01  | Cdx-2                | CDX2     | 0.0612535 | 23         |
| V\$SPI1_Q5     | SPI1                 | SPI1     | 0.0640412 | 23         |
| V\$ETS1_B      | c-Ets-1              | ETS1     | 0.255039  | 23         |
| V\$SPI1_03     | SPI1                 | SPI1     | 0.0640412 | 22         |
| V\$PITX1_01    | Pitx1                | PITX1    | 0.185173  | 22         |
| V\$SP1_Q6      | Sp1                  | SP1      | 0.200981  | 21         |
| V\$CMYB_01     | c-Myb                | MYB      | 0.0516481 | 21         |
| V\$AHR_Q5      | AhR                  | AHR      | 0.189366  | 21         |
| V\$ZBP89_Q4    | ZBP89                | ZNF148   | 0.205279  | 20         |
| V\$SP1_Q6_01   | Sp1                  | SP1      | 0.200981  | 20         |
| V\$YY1_Q6_03   | YY1                  | YY1      | 0.334341  | 20         |
| V\$CMAF_01     | c-Maf                | MAF      | 0.176484  | 20         |

|                |            |         |           |    |
|----------------|------------|---------|-----------|----|
| V\$NFAT2_Q5    | NF-AT2     | NFATC1  | 0.179036  | 19 |
| V\$SP1_Q2_01   | Sp1        | SP1     | 0.200981  | 19 |
| V\$YY1_Q6_02   | YY1        | YY1     | 0.334341  | 19 |
| V\$SP1_Q4_01   | Sp1        | SP1     | 0.200981  | 19 |
| V\$ETS2_B      | c-Ets-2    | ETS2    | 0.131472  | 19 |
| V\$TBX5_01     | TBX5       | TBX5    | 0.113131  | 19 |
| V\$FKLF_Q5     | FKLF       | KLF11   | 0.0255797 | 18 |
| V\$TEF1_Q6     | TEF-1      | TEAD1   | 0.15455   | 18 |
| V\$SP1_01      | Sp1        | SP1     | 0.200981  | 17 |
| V\$ELK1_02     | Elk-1      | ELK1    | 0.0324435 | 17 |
| V\$GFI1_Q6_01  | Gfi1       | GFI1    | 0.162873  | 17 |
| V\$PBX1_Q3     | Pbx1       | PBX1    | 0.134876  | 17 |
| V\$TEL1_02     | TEL1       | ETV6    | 0.187537  | 17 |
| V\$PBX1_04     | Pbx1       | PBX1    | 0.134876  | 17 |
| V\$ETV3_02     | ETV3       | ETV3    | 0.0862932 | 17 |
| V\$LRF_Q2      | LRF        | ZBTB7A  | 0.21155   | 17 |
| V\$ER71_02     | ER71       | ETV2    | 0.311685  | 17 |
| V\$HIF1A_Q6    | HIF-1alpha | HIF1A   | 0.0111761 | 16 |
| V\$TEF1_Q6_03  | TEF-1      | TEAD1   | 0.15455   | 16 |
| V\$IRF4_Q6     | IRF-4      | IRF4    | 0.154592  | 16 |
| V\$ARNT_01     | Arnt       | ARNT    | 0.103846  | 16 |
| V\$ELK1_06     | ELK-1      | ELK1    | 0.0324435 | 16 |
| V\$GFI1_Q6     | Gfi1       | GFI1    | 0.162873  | 16 |
| V\$CREM_Q6     | CREM       | CREM    | 0.060236  | 15 |
| V\$TFII_Q6     | TFII-I     | GTF2I   | 0.141662  | 15 |
| V\$RFX1_02     | RFX1       | RFX1    | 0.112624  | 14 |
| V\$AP2ALPHA_Q6 | AP-2alpha  | TFAP2A  | 0.140734  | 14 |
| V\$ETV7_01     | ETV7       | ETV7    | 0.0808462 | 14 |
| V\$SP1_02      | SP1        | SP1     | 0.200981  | 14 |
| V\$ESE1_Q3     | ESE-1      | ELF3    | 0.159757  | 14 |
| V\$ELF5_01     | ELF5       | ELF5    | 0.0236042 | 14 |
| V\$IRF7_Q3     | IRF-7      | IRF7    | 0.372284  | 14 |
| V\$STAT3_03    | STAT3      | STAT3   | 0.0365066 | 13 |
| V\$SP2_01      | SP2        | SP2     | 0.159219  | 13 |
| V\$RFX1_01     | RFX1       | RFX1    | 0.112624  | 13 |
| V\$CEBPD_Q6    | C/EBPdelta | CEBPD   | 0.0313301 | 12 |
| V\$EHF_03      | EHF        | EHF     | 0.104317  | 12 |
| V\$GFI1B_01    | Gfi1b      | GFI1B   | 0.125365  | 12 |
| V\$ATF1_Q6_01  | ATF-1      | ATF1    | 0.246657  | 12 |
| V\$VDR_Q3      | VDR        | VDR     | 0.105582  | 12 |
| V\$NEUROD_02   | NeuroD     | NEUROD1 | 0.0595728 | 11 |
| V\$ZABC1_01    | ZABC1      | ZNF217  | 0.177879  | 11 |
| V\$SPIB_03     | Spi-B      | SPIB    | 0.334165  | 11 |
| V\$GABPBETA_Q3 | GABP-beta  | GABPB1  | 0.349585  | 10 |
| V\$ELK1_01     | Elk-1      | ELK1    | 0.0324435 | 10 |
| V\$ESE1_02     | ESE-1      | ELF3    | 0.159757  | 10 |

|               |          |        |            |   |
|---------------|----------|--------|------------|---|
| V\$KAISO_01   | KAISO    | ZBTB33 | 0.20721    | 9 |
| V\$AP2BETA_Q3 | AP-2beta | TFAP2B | 0.0599479  | 8 |
| V\$CNOT3_01   | CNOT3    | CNOT3  | 0.0363908  | 8 |
| V\$MEIS1_01   | MEIS1    | MEIS1  | 0.1528     | 8 |
| V\$ATF3_Q6_01 | ATF-3    | ATF3   | 0.0814585  | 8 |
| V\$ATF4_Q6    | ATF-4    | ATF4   | 0.0803986  | 8 |
| V\$RNF96_01   | RNF96    | TRIM28 | 0.114558   | 6 |
| V\$ATF6_01    | ATF6     | ATF6   | 0.094943   | 5 |
| V\$IRF7_01    | IRF-7    | IRF7   | 0.372284   | 5 |
| V\$CREL_01    | c-Rel    | REL    | 0.118196   | 5 |
| V\$PAX3_01    | Pax-3    | PAX3   | 0.160383   | 4 |
| V\$MAFK_Q3    | MafK     | MAFK   | 0.150132   | 4 |
| V\$SREBP1_01  | SREBP-1  | SREBF1 | 0.129415   | 3 |
| V\$NMYC_01    | N-Myc    | MYCN   | 0.0836934  | 3 |
| V\$IRF2_01    | IRF-2    | IRF2   | 0.0859612  | 3 |
| V\$MAX_01     | Max      | MAX    | 0.17369    | 3 |
| V\$ARNT_02    | Arnt     | ARNT   | 0.103846   | 3 |
| V\$ATF2_Q5    | ATF-2    | ATF2   | 0.159399   | 3 |
| V\$GLI3_Q5_01 | GLI3     | GLI3   | 0.139925   | 3 |
| V\$GLI2_01    | GLI2     | GLI2   | 0.0678922  | 2 |
| V\$GLI_Q2     | GLI      | GLI1   | 0.222745   | 2 |
| V\$SRF_03     | SRF      | SRF    | 0.00643292 | 1 |
| V\$GLI3_01    | GLI3     | GLI3   | 0.139925   | 1 |
| V\$GLI3_02    | GLI3     | GLI3   | 0.139925   | 1 |

hsa-mir-299

| Matrix_id    | transcription factor | Gene  | PCC       | Occurrence |
|--------------|----------------------|-------|-----------|------------|
| V\$PUR1_Q4   | PUR1                 | PURA  | 0.15479   | 12         |
| V\$PARP_Q4   | PARP                 | PARP1 | 0.202273  | 11         |
| V\$PEA3_Q6   | PEA3                 | ETV4  | 0.0830607 | 10         |
| V\$YY1_Q6_03 | YY1                  | YY1   | 0.360428  | 9          |
| V\$GATA6_01  | GATA-6               | GATA6 | 0.350198  | 9          |
| V\$GATA2_02  | GATA-2               | GATA2 | 0.359908  | 9          |
| V\$TBP_Q6    | TBP                  | TBP   | 0.192257  | 8          |
| V\$YY1_01    | YY1                  | YY1   | 0.360428  | 8          |
| V\$MEF2C_Q4  | MEF-2C               | MEF2C | 0.14782   | 8          |
| V\$GATA3_01  | GATA-3               | GATA3 | 0.551874  | 8          |
| V\$GATA3_02  | GATA-3               | GATA3 | 0.551874  | 8          |
| V\$DLX5_01   | dlx5                 | DLX5  | 0.633356  | 7          |
| V\$GATA2_01  | GATA-2               | GATA2 | 0.359908  | 7          |
| V\$PITX3_Q2  | PITX3                | PITX3 | 0.223394  | 7          |
| V\$DAX1_01   | Dax1                 | NR0B1 | 0.220852  | 7          |

|               |            |         |            |   |
|---------------|------------|---------|------------|---|
| V\$PBX1_Q4    | Pbx1       | PBX1    | 0.197135   | 6 |
| V\$PARP_Q3    | PARP       | PARP1   | 0.202273   | 6 |
| V\$SREBP1_Q6  | SREBP-1    | SREBF1  | 0.662267   | 6 |
| V\$ING4_Q1    | ING4       | ING4    | 0.147261   | 6 |
| V\$PBX1_Q3    | Pbx1       | PBX1    | 0.197135   | 6 |
| V\$PITX2_Q1   | PITX2      | PITX2   | 0.239914   | 6 |
| V\$GR_Q6      | GR         | NR3C1   | 0.0314611  | 6 |
| V\$FOXJ2_Q1   | FOXJ2      | FOXJ2   | 0.190163   | 5 |
| V\$MEF2A_Q6   | mef2A      | MEF2A   | 0.0243615  | 5 |
| V\$PITX2_Q2   | Pitx2      | PITX2   | 0.239914   | 5 |
| V\$STAT3_Q3   | STAT3      | STAT3   | 0.0666073  | 5 |
| V\$PIT1_Q6    | Pit-1      | POU1F1  | 0.043835   | 5 |
| V\$NURR1_Q3   | NURR1      | NR4A2   | 0.255788   | 4 |
| V\$GATA3_Q3   | GATA-3     | GATA3   | 0.551874   | 4 |
| V\$CIZ_Q1     | CIZ        | ZNF384  | 0.250201   | 3 |
| V\$GR_Q1      | GR         | NR3C1   | 0.0314611  | 3 |
| V\$HNF6_Q6    | HNF6       | ONECUT1 | 0.0871508  | 3 |
| V\$CEBPD_Q6   | C/EBPdelta | CEBPD   | 0.194752   | 3 |
| V\$RORA_Q1    | RORalpha2  | RORA    | 0.343536   | 2 |
| V\$EAR2_Q2    | EAR2       | NR2F6   | 0.285887   | 2 |
| V\$RORBETA_Q2 | RORBETA    | RORB    | 0.00365565 | 2 |
| V\$CEBPB_Q6   | C/EBPbeta  | CEBPB   | 0.367332   | 2 |
| V\$TCF4_Q1    | TCF-4      | TCF7L2  | 0.252918   | 2 |
| V\$CEBPB_Q2   | C/EBPbeta  | CEBPB   | 0.367332   | 2 |
| V\$MSX1_Q1    | Msx-1      | MSX1    | 0.0170235  | 2 |
| V\$FOXO4_Q1   | FOXO4      | FOXO4   | 0.675947   | 2 |
| V\$SOX10_Q6   | SOX10      | SOX10   | 0.0437846  | 2 |
| V\$RORA_Q4    | RORalpha   | RORA    | 0.343536   | 2 |
| V\$CART1_Q2   | CART1      | ALX1    | 0.0128454  | 2 |
| V\$HOX13_Q2   | HOXA5      | HOXA5   | 0.473272   | 2 |
| V\$CEBPB_Q1   | C/EBPbeta  | CEBPB   | 0.367332   | 2 |
| V\$CDP_Q4     | CDP        | CUX1    | 0.153101   | 1 |

hsa-mir-29a

| Matrix_id    | transcription factor | Gene   | PCC      | Occurrence |
|--------------|----------------------|--------|----------|------------|
| V\$TTF1_Q5   | TTF-1                | NKX2-1 | 0.155148 | 4          |
| V\$PARP_Q3   | PARP                 | PARP1  | 0.358367 | 4          |
| V\$IPF1_Q1   | IPF1                 | PDX1   | 0.499714 | 4          |
| V\$DLX5_Q1   | dlx5                 | DLX5   | 0.10159  | 4          |
| V\$PARP_Q4   | PARP                 | PARP1  | 0.358367 | 4          |
| V\$IRF8_Q6   | IRF-8                | IRF8   | 0.219905 | 4          |
| V\$YY1_Q6_Q2 | YY1                  | YY1    | 0.261918 | 4          |



|                   |            |        |            |   |
|-------------------|------------|--------|------------|---|
| V\$HNF3B_Q6       | HNF-3beta  | FOXA2  | 0.165239   | 4 |
| V\$NANOG_Q2       | Nanog      | NANOG  | 0.585116   | 4 |
| V\$AP2REP_Q1      | AP-2rep    | KLF12  | 0.44988    | 4 |
| V\$CDX2_Q5_Q1     | Cdx-2      | CDX2   | 0.520227   | 4 |
| V\$ETS2_B         | c-Ets-2    | ETS2   | 0.462824   | 4 |
| V\$PUR1_Q4        | PUR1       | PURA   | 0.358976   | 4 |
| V\$YY1_Q6         | YY1        | YY1    | 0.261918   | 4 |
| V\$CDX2_Q5_Q2     | CDX-2      | CDX2   | 0.520227   | 4 |
| V\$SRY_Q2         | SRY        | SRY    | 0.357033   | 4 |
| V\$PEA3_Q6        | PEA3       | ETV4   | 0.511042   | 4 |
| V\$SOX5_Q1        | SOX5       | SOX5   | 0.0186502  | 4 |
| V\$GATA3_Q1       | GATA-3     | GATA3  | 0.0148384  | 4 |
| V\$GATA2_Q1       | GATA-2     | GATA2  | 0.326998   | 4 |
| V\$YY1_Q1         | YY1        | YY1    | 0.261918   | 4 |
| V\$GFI1_Q6        | Gfi1       | GFI1   | 0.00372793 | 3 |
| V\$TEF1_Q6_Q3     | TEF-1      | TEAD1  | 0.556891   | 3 |
| V\$HBP1_Q2        | hbp1       | HBP1   | 0.561559   | 3 |
| V\$PBX1_Q4        | Pbx1       | PBX1   | 0.118677   | 3 |
| V\$GABPA_Q4       | GABP-alpha | GABPA  | 0.204318   | 3 |
| V\$HNF1_Q2        | HNF-1alpha | HNF1A  | 0.27284    | 3 |
| V\$CDX2_Q1        | Cdx-2      | CDX2   | 0.520227   | 3 |
| V\$PITX3_Q2       | PITX3      | PITX3  | 0.47697    | 3 |
| V\$HOXD9_Q2       | Hoxd9      | HOXD9  | 0.301871   | 3 |
| V\$MEF2C_Q4       | MEF-2C     | MEF2C  | 0.263921   | 3 |
| V\$FOXJ2_Q1       | FOXJ2      | FOXJ2  | 0.388292   | 3 |
| V\$PBX1_Q3        | Pbx1       | PBX1   | 0.118677   | 3 |
| V\$GATA3_Q3       | GATA-3     | GATA3  | 0.0148384  | 3 |
| V\$MSX1_Q1        | Msx-1      | MSX1   | 0.525522   | 3 |
| V\$ZABC1_Q1       | ZABC1      | ZNF217 | 0.114042   | 3 |
| V\$BCL6_Q3_Q1     | Bcl-6      | BCL6   | 0.565838   | 3 |
| V\$SMAD4_Q6_Q1    | Smad4      | SMAD4  | 0.421155   | 3 |
| V\$SMAD3_Q6_Q1    | Smad3      | SMAD3  | 0.489464   | 3 |
| V\$CEBPB_Q2       | C/EBPbeta  | CEBPB  | 0.0553315  | 3 |
| V\$NFAT4_Q3       | NF-AT4     | NFATC3 | 0.164029   | 3 |
| V\$MYOGENIN_Q6    | myogenin   | MYOG   | 0.401179   | 3 |
| V\$IRF4_Q6        | IRF-4      | IRF4   | 0.554067   | 3 |
| V\$P300_Q1        | p300       | EP300  | 0.540185   | 3 |
| V\$TCF3_Q1        | TCF-3      | TCF7L1 | 0.255292   | 2 |
| V\$AP4_Q6_Q2      | AP-4       | TFAP4  | 0.427192   | 2 |
| V\$MATH1_Q2       | MATH1      | ATO1   | 0.2921     | 2 |
| V\$GFI1_Q6_Q1     | Gfi1       | GFI1   | 0.00372793 | 2 |
| V\$MYOGENIN_Q6_Q1 | myogenin   | MYOG   | 0.401179   | 2 |
| V\$IPF1_Q4        | IPF1       | PDX1   | 0.499714   | 2 |
| V\$AMEF2_Q6       | aMEF-2     | MEF2A  | 0.173239   | 2 |
| V\$IPF1_Q2        | IPF1       | PDX1   | 0.499714   | 2 |
| V\$CMF_Q1         | c-Maf      | MAF    | 0.399208   | 2 |

|               |            |              |           |   |
|---------------|------------|--------------|-----------|---|
| V\$FOXJ2_Q2   | FOXJ2      | FOXJ2        | 0.388292  | 2 |
| V\$IPF1_Q4_Q1 | IPF1       | PDX1         | 0.499714  | 2 |
| V\$PIT1_Q6    | Pit-1      | POU1F1       | 0.0812911 | 2 |
| V\$SMAD3_Q6   | SMAD3      | SMAD3        | 0.489464  | 2 |
| V\$CEBPD_Q6   | C/EBPdelta | CEBPD        | 0.0171301 | 2 |
| V\$IPF1_Q6    | IPF1       | PDX1         | 0.499714  | 2 |
| V\$FAC1_Q1    | FAC1       | BPTF         | 0.344513  | 2 |
| V\$NKX3A_Q2   | Nkx3A      | NKX3-1       | 0.0805136 | 2 |
| V\$AP4_Q5     | AP-4       | TFAP4        | 0.427192  | 2 |
| V\$AP4_Q6     | AP-4       | TFAP4        | 0.427192  | 2 |
| V\$CDX1_Q1    | Cdx-1      | CDX1         | 0.150548  | 2 |
| V\$GATA2_Q2   | GATA-2     | GATA2        | 0.326998  | 2 |
| V\$GATA3_Q2   | GATA-3     | GATA3        | 0.0148384 | 2 |
| V\$HOXA9_Q1   | hoxa9      | HOXA9        | 0.542455  | 2 |
| V\$MEF2A_Q6   | mef2A      | MEF2A        | 0.173239  | 1 |
| V\$CDP_Q2     | CDP        | CUX1         | 0.0701507 | 1 |
| V\$IPF1_Q6    | ipf1       | PDX1         | 0.499714  | 1 |
| V\$HLF_Q1     | HLF        | HLF          | 0.0750673 | 1 |
| V\$BACH1_Q1   | Bach1      | BACH1        | 0.338456  | 1 |
| V\$HOX13_Q2   | HOXA5      | HOXA5        | 0.161241  | 1 |
| V\$POU6F1_Q2  | POU6F1     | POU6F1       | 0.37916   | 1 |
| V\$POU6F1_Q3  | POU6F1     | POU6F1       | 0.37916   | 1 |
| V\$OCT2_Q1    |            | 2-Oct POU2F2 | 0.376439  | 1 |
| V\$CART1_Q2   | CART1      | ALX1         | 0.523123  | 1 |
| V\$IPF1_Q3    | IPF1       | PDX1         | 0.499714  | 1 |
| V\$GFI1B_Q1   | Gfi1b      | GFI1B        | 0.345115  | 1 |
| V\$IRF1_Q6_Q1 | IRF-1      | IRF1         | 0.324401  | 1 |
| V\$OC2_Q3     | OC-2       | ONECUT2      | 0.35004   | 1 |

hsa-mir-29b-1

| Matrix_id      | transcription factor | Gene   | PCC      | Occurrence |
|----------------|----------------------|--------|----------|------------|
| V\$PUR1_Q4     | PUR1                 | PURA   | 0.530335 | 172        |
| V\$PEA3_Q6     | PEA3                 | ETV4   | 0.711858 | 170        |
| V\$PARP_Q4     | PARP                 | PARP1  | 0.618848 | 168        |
| V\$AP2REP_Q1   | AP-2rep              | KLF12  | 0.619092 | 167        |
| V\$P300_Q1     | p300                 | EP300  | 0.758039 | 164        |
| V\$NFAT4_Q3    | NF-AT4               | NFATC3 | 0.319925 | 151        |
| V\$CETS1_Q6    | C-ets-1              | ETS1   | 0.110153 | 149        |
| V\$ETS1_B      | c-Ets-1              | ETS1   | 0.110153 | 147        |
| V\$GATA1_Q1    | GATA-1               | GATA1  | 0.120139 | 145        |
| V\$GABPA_Q4    | GABP-alpha           | GABPA  | 0.331341 | 143        |
| V\$SMAD4_Q6_Q1 | Smad4                | SMAD4  | 0.615185 | 143        |

|                |            |        |           |     |
|----------------|------------|--------|-----------|-----|
| V\$CDX2_Q5_02  | CDX-2      | CDX2   | 0.743958  | 141 |
| V\$TBP_Q6      | TBP        | TBP    | 0.268457  | 141 |
| V\$SOX9_Q4     | SOX9       | SOX9   | 0.0416165 | 138 |
| V\$TTF1_Q5     | TTF-1      | NKX2-1 | 0.0550804 | 135 |
| V\$SMAD3_Q6_01 | Smad3      | SMAD3  | 0.728804  | 134 |
| V\$MEF2C_Q4    | MEF-2C     | MEF2C  | 0.43422   | 127 |
| V\$SPI1_Q5     | SPI1       | SPI1   | 0.0875851 | 127 |
| V\$DLX5_01     | dlx5       | DLX5   | 0.435447  | 126 |
| V\$YY1_Q6      | YY1        | YY1    | 0.351718  | 126 |
| V\$AP4_Q6_02   | AP-4       | TFAP4  | 0.666064  | 125 |
| V\$YY1_Q6_02   | YY1        | YY1    | 0.351718  | 125 |
| V\$ETS2_B      | c-Ets-2    | ETS2   | 0.767429  | 124 |
| V\$YY1_01      | YY1        | YY1    | 0.351718  | 124 |
| V\$NANOG_02    | Nanog      | NANOG  | 0.787557  | 123 |
| V\$SOX9_B1     | SOX9       | SOX9   | 0.0416165 | 123 |
| V\$SOX5_01     | SOX5       | SOX5   | 0.41039   | 123 |
| V\$CDX2_Q5_01  | Cdx-2      | CDX2   | 0.743958  | 118 |
| V\$PARP_Q3     | PARP       | PARP1  | 0.618848  | 118 |
| V\$GATA2_02    | GATA-2     | GATA2  | 0.546534  | 116 |
| V\$GATA1_06    | GATA-1     | GATA1  | 0.120139  | 116 |
| V\$GATA1_05    | GATA-1     | GATA1  | 0.120139  | 116 |
| V\$GATA1_02    | GATA-1     | GATA1  | 0.120139  | 116 |
| V\$IPF1_01     | IPF1       | PDX1   | 0.723155  | 114 |
| V\$SRY_02      | SRY        | SRY    | 0.646544  | 112 |
| V\$IPF1_Q6     | IPF1       | PDX1   | 0.723155  | 111 |
| V\$HNF3B_Q6    | HNF-3beta  | FOXA2  | 0.450927  | 109 |
| V\$CDX2_01     | Cdx-2      | CDX2   | 0.743958  | 109 |
| V\$IPF1_Q4_01  | IPF1       | PDX1   | 0.723155  | 108 |
| V\$PITX3_Q2    | PITX3      | PITX3  | 0.607269  | 104 |
| V\$GATA3_02    | GATA-3     | GATA3  | 0.142481  | 103 |
| V\$GATA1_04    | GATA-1     | GATA1  | 0.120139  | 100 |
| V\$HNF1_02     | HNF-1alpha | HNF1A  | 0.520495  | 96  |
| V\$IRF4_Q6     | IRF-4      | IRF4   | 0.759376  | 95  |
| V\$GATA3_01    | GATA-3     | GATA3  | 0.142481  | 94  |
| V\$PBX1_04     | Pbx1       | PBX1   | 0.0617585 | 92  |
| V\$IPF1_Q4     | IPF1       | PDX1   | 0.723155  | 91  |
| V\$MYOGENIN_Q6 | myogenin   | MYOG   | 0.730133  | 88  |
| V\$AP4_Q5      | AP-4       | TFAP4  | 0.666064  | 87  |
| V\$TEF1_Q6_03  | TEF-1      | TEAD1  | 0.760236  | 86  |
| V\$GFI1_Q6     | Gfi1       | GFI1   | 0.11204   | 85  |
| V\$CEBPE_Q6    | CEBPE      | CEBPE  | 0.0254242 | 84  |
| V\$FOXJ2_01    | FOXJ2      | FOXJ2  | 0.682982  | 84  |
| V\$PBX1_Q3     | Pbx1       | PBX1   | 0.0617585 | 82  |
| V\$CMF1_01     | c-Maf      | MAF    | 0.5767    | 82  |
| V\$GATA2_01    | GATA-2     | GATA2  | 0.546534  | 80  |
| V\$GFI1_Q6_01  | Gfi1       | GFI1   | 0.11204   | 79  |

|                   |            |              |           |    |
|-------------------|------------|--------------|-----------|----|
| V\$FOXM1_01       | FOXM1      | FOXM1        | 0.0205374 | 79 |
| V\$TCF3_01        | TCF-3      | TCF7L1       | 0.555626  | 77 |
| V\$IRF8_Q6        | IRF-8      | IRF8         | 0.0741368 | 74 |
| V\$AP4_Q6         | AP-4       | TFAP4        | 0.666064  | 71 |
| V\$TCF4_Q5        | TCF-4      | TCF7L2       | 0.0901249 | 70 |
| V\$BCL6_Q3_01     | Bcl-6      | BCL6         | 0.750833  | 69 |
| V\$ELF5_01        | ELF5       | ELF5         | 0.173356  | 69 |
| V\$MYOGENIN_Q6_01 | myogenin   | MYOG         | 0.730133  | 67 |
| V\$FAC1_01        | FAC1       | BPTF         | 0.216539  | 67 |
| V\$CEBPD_Q6       | C/EBPdelta | CEBPD        | 0.328507  | 67 |
| V\$GFI1B_01       | Gfi1b      | GFI1B        | 0.528938  | 66 |
| V\$PIT1_Q6        | Pit-1      | POU1F1       | 0.262906  | 65 |
| V\$OC2_Q3         | OC-2       | ONECUT2      | 0.510592  | 65 |
| V\$CEBPB_02       | C/EBPbeta  | CEBPB        | 0.322783  | 64 |
| V\$GATA3_03       | GATA-3     | GATA3        | 0.142481  | 62 |
| V\$ZABC1_01       | ZABC1      | ZNF217       | 0.122903  | 61 |
| V\$HOXA9_01       | hoxa9      | HOXA9        | 0.756695  | 60 |
| V\$SMAD3_Q6       | SMAD3      | SMAD3        | 0.728804  | 59 |
| V\$CDX1_01        | Cdx-1      | CDX1         | 0.431879  | 59 |
| V\$HBP1_Q2        | hbp1       | HBP1         | 0.592445  | 57 |
| V\$HOXD9_Q2       | Hoxd9      | HOXD9        | 0.618871  | 57 |
| V\$CEBPG_Q6_01    | C/EBPgamma | CEBPG        | 0.17976   | 56 |
| V\$MSX1_01        | Msx-1      | MSX1         | 0.64799   | 51 |
| V\$MATH1_Q2       | MATH1      | ATOH1        | 0.576819  | 49 |
| V\$IPF1_02        | IPF1       | PDX1         | 0.723155  | 48 |
| V\$CART1_02       | CART1      | ALX1         | 0.754041  | 46 |
| V\$HOX13_02       | HOXA5      | HOXA5        | 0.195525  | 46 |
| V\$HNF6_Q6        | HNF6       | ONECUT1      | 0.0978169 | 45 |
| V\$MEF2A_Q6       | mef2A      | MEF2A        | 0.147381  | 45 |
| V\$IPF1_06        | ipf1       | PDX1         | 0.723155  | 42 |
| V\$IPF1_03        | IPF1       | PDX1         | 0.723155  | 41 |
| V\$IRF1_Q6_01     | IRF-1      | IRF1         | 0.530794  | 31 |
| V\$CEBPG_Q6       | C/EBPgamma | CEBPG        | 0.17976   | 26 |
| V\$POU6F1_03      | POU6F1     | POU6F1       | 0.576554  | 26 |
| V\$POU6F1_02      | POU6F1     | POU6F1       | 0.576554  | 21 |
| V\$FOXJ2_02       | FOXJ2      | FOXJ2        | 0.682982  | 20 |
| V\$OCT2_01        |            | 2-Oct POU2F2 | 0.682205  | 19 |
| V\$AMEF2_Q6       | aMEF-2     | MEF2A        | 0.147381  | 15 |
| V\$CDP_02         | CDP        | CUX1         | 0.337132  | 10 |
| V\$BACH1_01       | Bach1      | BACH1        | 0.564701  | 10 |
| V\$NKX3A_02       | Nkx3A      | NKX3-1       | 0.0829537 | 7  |
| V\$HLF_01         | HLF        | HLF          | 0.201804  | 3  |

| Matrix_id      | transcription factor | Gene     | PCC       | Occurrence |
|----------------|----------------------|----------|-----------|------------|
| V\$PUR1_Q4     | PUR1                 | PURA     | 0.530335  | 172        |
| V\$PEA3_Q6     | PEA3                 | ETV4     | 0.711858  | 170        |
| V\$PARP_Q4     | PARP                 | PARP1    | 0.618848  | 168        |
| V\$AP2REP_01   | AP-2rep              | KLF12    | 0.619092  | 167        |
| V\$IK_Q5       | Ikaros               | IKZF1    | 0.560181  | 166        |
| V\$P300_01     | p300                 | EP300    | 0.758039  | 164        |
| V\$GKLF_Q4     | GKLF                 | KLF4     | 0.0950702 | 162        |
| V\$NFAT4_Q3    | NF-AT4               | NFATC3   | 0.319925  | 151        |
| V\$ZIC3_01     | Zic3                 | ZIC3     | 0.459784  | 149        |
| V\$CETS1_Q6    | C-ets-1              | ETS1     | 0.110153  | 149        |
| V\$ETS1_B      | c-Ets-1              | ETS1     | 0.110153  | 147        |
| V\$GATA1_01    | GATA-1               | GATA1    | 0.120139  | 145        |
| V\$GABPA_Q4    | GABP-alpha           | GABPA    | 0.331341  | 143        |
| V\$SMAD4_Q6_01 | Smad4                | SMAD4    | 0.615185  | 143        |
| V\$Elf5_03     | ELF5                 | ELF5     | 0.173356  | 141        |
| V\$ETS2_Q6     | c-Ets-2              | ETS2     | 0.767429  | 139        |
| V\$NR1B2_Q6    | NR1B2                | RARB     | 0.651012  | 139        |
| V\$SOX9_Q4     | SOX9                 | SOX9     | 0.0416165 | 138        |
| V\$GR_Q6       | GR                   | NR3C1    | 0.657552  | 137        |
| V\$TTF1_Q5     | TTF-1                | NKX2-1   | 0.0550804 | 135        |
| V\$SMAD3_Q6_01 | Smad3                | SMAD3    | 0.728804  | 134        |
| V\$SPI1_03     | SPI1                 | SPI1     | 0.0875851 | 130        |
| V\$BEN_01      | BEN                  | GTF2IRD1 | 0.764344  | 128        |
| V\$SPI1_Q5     | SPI1                 | SPI1     | 0.0875851 | 127        |
| V\$YY1_Q6      | YY1                  | YY1      | 0.351718  | 126        |
| V\$AML1_Q6     | AML1                 | RUNX1    | 0.528544  | 125        |
| V\$YY1_Q6_02   | YY1                  | YY1      | 0.351718  | 125        |
| V\$AP4_Q6_02   | AP-4                 | TFAP4    | 0.666064  | 125        |
| V\$SOX9_B1     | SOX9                 | SOX9     | 0.0416165 | 123        |
| V\$SOX5_01     | SOX5                 | SOX5     | 0.41039   | 123        |
| V\$PARP_Q3     | PARP                 | PARP1    | 0.618848  | 118        |
| V\$GATA1_02    | GATA-1               | GATA1    | 0.120139  | 116        |
| V\$GATA1_05    | GATA-1               | GATA1    | 0.120139  | 116        |
| V\$GATA2_02    | GATA-2               | GATA2    | 0.546534  | 116        |
| V\$GATA1_06    | GATA-1               | GATA1    | 0.120139  | 116        |
| V\$HNF4A_Q6_01 | HNF-4alpha           | HNF4A    | 0.343397  | 114        |
| V\$SRY_02      | SRY                  | SRY      | 0.646544  | 112        |
| V\$LRF_Q2      | LRF                  | ZBTB7A   | 0.602486  | 111        |
| V\$IPF1_Q6     | IPF1                 | PDX1     | 0.723155  | 111        |
| V\$HNF3B_Q6    | HNF-3beta            | FOXA2    | 0.450927  | 109        |
| V\$IPF1_Q4_01  | IPF1                 | PDX1     | 0.723155  | 108        |
| V\$MAZ_Q6      | MAZ                  | MAZ      | 0.0613328 | 108        |
| V\$HNF3A_01    | HNF3A                | FOXA1    | 0.367146  | 105        |

|                   |            |         |           |     |
|-------------------|------------|---------|-----------|-----|
| V\$ERBETA_Q5      | ER-beta    | ESR2    | 0.613175  | 103 |
| V\$GATA3_Q2       | GATA-3     | GATA3   | 0.142481  | 103 |
| V\$NFAT2_Q5       | NF-AT2     | NFATC1  | 0.642484  | 101 |
| V\$E2A_Q6         | E2A        | TCF3    | 0.581089  | 101 |
| V\$GATA1_Q4       | GATA-1     | GATA1   | 0.120139  | 100 |
| V\$E47_Q2         | E47        | TCF3    | 0.581089  | 100 |
| V\$E12_Q6         | E12        | TCF3    | 0.581089  | 100 |
| V\$YY1_Q6_Q3      | YY1        | YY1     | 0.351718  | 99  |
| V\$MYOD_Q6_Q1     | MyoD       | MYOD1   | 0.642041  | 98  |
| V\$FOXO3A_Q1      | FOXO3A     | FOXO3   | 0.788477  | 96  |
| V\$HNF1_Q2        | HNF-1alpha | HNF1A   | 0.520495  | 96  |
| V\$IRF4_Q6        | IRF-4      | IRF4    | 0.759376  | 95  |
| V\$AP2ALPHA_Q6    | AP-2alpha  | TFAP2A  | 0.310934  | 95  |
| V\$GATA3_Q1       | GATA-3     | GATA3   | 0.142481  | 94  |
| V\$AP2ALPHA_Q1    | AP-2alpha  | TFAP2A  | 0.310934  | 94  |
| V\$ZBP89_Q4       | ZBP89      | ZNF148  | 0.649159  | 89  |
| V\$AML2_Q3        | AML2       | RUNX3   | 0.165156  | 89  |
| V\$AP4_Q5         | AP-4       | TFAP4   | 0.666064  | 87  |
| V\$TEF1_Q6_Q3     | TEF-1      | TEAD1   | 0.760236  | 86  |
| V\$GR_Q1          | GR         | NR3C1   | 0.657552  | 86  |
| V\$GFI1_Q6        | Gfi1       | GFI1    | 0.11204   | 85  |
| V\$CEBPE_Q6       | CEBPE      | CEBPE   | 0.0254242 | 84  |
| V\$TFII_Q6        | TFII-I     | GTF2I   | 0.619884  | 83  |
| V\$FKLF_Q5        | FKLF       | KLF11   | 0.0891492 | 83  |
| V\$FOXP3_Q1       | FOXP3      | FOXP3   | 0.740134  | 82  |
| V\$CMF_Q1         | c-Maf      | MAF     | 0.5767    | 82  |
| V\$TEF1_Q6        | TEF-1      | TEAD1   | 0.760236  | 81  |
| V\$GATA2_Q1       | GATA-2     | GATA2   | 0.546534  | 80  |
| V\$MAZ_Q6_Q1      | MAZ        | MAZ     | 0.0613328 | 79  |
| V\$GFI1_Q6_Q1     | Gfi1       | GFI1    | 0.11204   | 79  |
| V\$FOXM1_Q1       | FOXM1      | FOXM1   | 0.0205374 | 79  |
| V\$TCF3_Q1        | TCF-3      | TCF7L1  | 0.555626  | 77  |
| V\$ZFX_Q1         | Zfx        | ZFX     | 0.743259  | 76  |
| V\$RFX1_Q2        | RFX1       | RFX1    | 0.795275  | 75  |
| V\$IRF8_Q6        | IRF-8      | IRF8    | 0.0741368 | 74  |
| V\$KLF15_Q2       | KLF15      | KLF15   | 0.108618  | 74  |
| V\$AML1_Q1        | AML1a      | RUNX1   | 0.528544  | 73  |
| V\$NEUROD_Q2      | NeuroD     | NEUROD1 | 0.70818   | 73  |
| V\$AP4_Q6         | AP-4       | TFAP4   | 0.666064  | 71  |
| V\$TCF4_Q5        | TCF-4      | TCF7L2  | 0.0901249 | 70  |
| V\$EGR1_Q2        | EGR-1      | EGR1    | 0.286737  | 70  |
| V\$ELF5_Q1        | ELF5       | ELF5    | 0.173356  | 69  |
| V\$WT1_Q6         | WT1        | WT1     | 0.207727  | 67  |
| V\$MYOGENIN_Q6_Q1 | myogenin   | MYOG    | 0.730133  | 67  |
| V\$ERR1_Q3        | ERR1       | ESRRA   | 0.54526   | 66  |
| V\$GFI1B_Q1       | Gfi1b      | GFI1B   | 0.528938  | 66  |

|                |            |        |           |    |
|----------------|------------|--------|-----------|----|
| V\$AML1_Q4     | AML1       | RUNX1  | 0.528544  | 64 |
| V\$AP2BETA_Q3  | AP-2beta   | TFAP2B | 0.802422  | 63 |
| V\$AP2GAMMA_01 | AP-2gamma  | TFAP2C | 0.441301  | 62 |
| V\$ZABC1_01    | ZABC1      | ZNF217 | 0.122903  | 61 |
| V\$GATA2_03    | GATA-2     | GATA2  | 0.546534  | 59 |
| V\$YY1_02      | YY1        | YY1    | 0.351718  | 58 |
| V\$CEBPG_Q6_01 | C/EBPgamma | CEBPG  | 0.17976   | 56 |
| V\$MATH1_Q2    | MATH1      | ATOH1  | 0.576819  | 49 |
| V\$ZIC1_01     | Zic1       | ZIC1   | 0.190298  | 48 |
| V\$NURR1_Q3    | NURR1      | NR4A2  | 0.222409  | 45 |
| V\$MEIS1_01    | MEIS1      | MEIS1  | 0.166181  | 42 |
| V\$AP4_01      | AP-4       | TFAP4  | 0.666064  | 35 |
| V\$RORBETA_Q2  | RORBETA    | RORB   | 0.669982  | 30 |
| V\$STAF_02     | Staf       | ZNF143 | 0.738901  | 29 |
| V\$CEBPG_Q6    | C/EBPgamma | CEBPG  | 0.17976   | 26 |
| V\$GLI_Q2      | GLI        | GLI1   | 0.0455023 | 18 |
| V\$GLI2_01     | GLI2       | GLI2   | 0.770884  | 13 |
| V\$GLI3_01     | GLI3       | GLI3   | 0.765935  | 11 |
| V\$GLI3_02     | GLI3       | GLI3   | 0.765935  | 11 |
| V\$MEIS1_02    | Meis1      | MEIS1  | 0.166181  | 4  |

hsa-mir-29c

| Matrix_id      | transcription factor | Gene     | PCC       | Occurrence |
|----------------|----------------------|----------|-----------|------------|
| V\$SRY_02      | SRY                  | SRY      | 0.215772  | 5          |
| V\$PUR1_Q4     | PUR1                 | PURA     | 0.276416  | 5          |
| V\$SOX9_B1     | SOX9                 | SOX9     | 0.270977  | 5          |
| V\$IRF4_Q6     | IRF-4                | IRF4     | 0.291293  | 5          |
| V\$ZIC3_01     | Zic3                 | ZIC3     | 0.251676  | 5          |
| V\$GR_01       | GR                   | NR3C1    | 0.321556  | 5          |
| V\$BEN_01      | BEN                  | GTF2IRD1 | 0.299695  | 5          |
| V\$GKLF_Q4     | GKLF                 | KLF4     | 0.0326416 | 5          |
| V\$YY1_Q6      | YY1                  | YY1      | 0.134519  | 5          |
| V\$RFX1_02     | RFX1                 | RFX1     | 0.279609  | 5          |
| V\$IK_Q5       | Ikaros               | IKZF1    | 0.142149  | 5          |
| V\$GR_Q6       | GR                   | NR3C1    | 0.321556  | 5          |
| V\$P300_01     | p300                 | EP300    | 0.273868  | 5          |
| V\$TTF1_Q5     | TTF-1                | NKX2-1   | 0.238232  | 5          |
| V\$SOX9_Q4     | SOX9                 | SOX9     | 0.270977  | 5          |
| V\$PARP_Q4     | PARP                 | PARP1    | 0.0647563 | 5          |
| V\$HNF4A_Q6_01 | HNF-4alpha           | HNF4A    | 0.0426996 | 5          |
| V\$FOXO3A_Q1   | FOXO3A               | FOXO3    | 0.202483  | 4          |
| V\$NR1B2_Q6    | NR1B2                | RARB     | 0.190087  | 4          |

|                |            |         |           |   |
|----------------|------------|---------|-----------|---|
| V\$YY1_Q6_02   | YY1        | YY1     | 0.134519  | 4 |
| V\$PARP_Q3     | PARP       | PARP1   | 0.0647563 | 4 |
| V\$ETS2_Q6     | c-Ets-2    | ETS2    | 0.29874   | 4 |
| V\$GFI1B_01    | Gfi1b      | GFI1B   | 0.0965739 | 4 |
| V\$AML1_Q6     | AML1       | RUNX1   | 0.1439    | 4 |
| V\$ELF1_Q6     | Elf-1      | ELF1    | 0.199867  | 4 |
| V\$GABPA_Q4    | GABP-alpha | GABPA   | 0.126027  | 4 |
| V\$YY1_Q6_03   | YY1        | YY1     | 0.134519  | 4 |
| V\$GATA2_02    | GATA-2     | GATA2   | 0.0333829 | 4 |
| V\$AP2REP_01   | AP-2rep    | KLF12   | 0.169329  | 4 |
| V\$PEA3_Q6     | PEA3       | ETV4    | 0.284163  | 4 |
| V\$SMAD3_Q6_01 | Smad3      | SMAD3   | 0.375557  | 4 |
| V\$SMAD4_Q6_01 | Smad4      | SMAD4   | 0.236302  | 4 |
| V\$AML1_Q4     | AML1       | RUNX1   | 0.1439    | 3 |
| V\$FOXP3_01    | FOXP3      | FOXP3   | 0.190528  | 3 |
| V\$ZBP89_Q4    | ZBP89      | ZNF148  | 0.385165  | 3 |
| V\$TCF3_01     | TCF-3      | TCF7L1  | 0.232017  | 3 |
| V\$HNF3B_Q6    | HNF-3beta  | FOXA2   | 0.0618684 | 3 |
| V\$KLF15_Q2    | KLF15      | KLF15   | 0.13574   | 3 |
| V\$Elf5_03     | ELF5       | ELF5    | 0.456788  | 3 |
| V\$NFAT2_Q5    | NF-AT2     | NFATC1  | 0.205611  | 3 |
| V\$AML1_01     | AML1a      | RUNX1   | 0.1439    | 3 |
| V\$AP2BETA_Q3  | AP-2beta   | TFAP2B  | 0.241229  | 3 |
| V\$ERBETA_Q5   | ER-beta    | ESR2    | 0.0620713 | 3 |
| V\$AML2_Q3     | AML2       | RUNX3   | 0.115472  | 3 |
| V\$TEF1_Q6_03  | TEF-1      | TEAD1   | 0.238361  | 3 |
| V\$HNF1_02     | HNF-1alpha | HNF1A   | 0.162336  | 3 |
| V\$LRF_Q2      | LRF        | ZBTB7A  | 0.132967  | 3 |
| V\$GATA2_03    | GATA-2     | GATA2   | 0.0333829 | 3 |
| V\$E12_Q6      | E12        | TCF3    | 0.151716  | 3 |
| V\$IPF1_Q4_01  | IPF1       | PDX1    | 0.209686  | 3 |
| V\$HNF3A_01    | HNF3A      | FOXA1   | 0.177868  | 3 |
| V\$E2A_Q6      | E2A        | TCF3    | 0.151716  | 3 |
| V\$E47_Q2      | E47        | TCF3    | 0.151716  | 3 |
| V\$IPF1_Q6     | IPF1       | PDX1    | 0.209686  | 3 |
| V\$MYOD_Q6_01  | MyoD       | MYOD1   | 0.205284  | 3 |
| V\$TCF4_Q5     | TCF-4      | TCF7L2  | 0.107403  | 3 |
| V\$NEUROD_02   | NeuroD     | NEUROD1 | 0.260504  | 2 |
| V\$ERR1_Q3     | ERR1       | ESRRA   | 0.138435  | 2 |
| V\$AP2GAMMA_01 | AP-2gamma  | TFAP2C  | 0.026114  | 2 |
| V\$EGR1_02     | EGR-1      | EGR1    | 0.594856  | 2 |
| V\$GATA2_01    | GATA-2     | GATA2   | 0.0333829 | 2 |
| V\$YY1_02      | YY1        | YY1     | 0.134519  | 2 |
| V\$TEF1_Q6     | TEF-1      | TEAD1   | 0.238361  | 2 |
| V\$TFII-Q6     | TFII-I     | GTF2I   | 0.19271   | 2 |
| V\$ZFX_01      | Zfx        | ZFX     | 0.335417  | 2 |



|                   |          |        |          |   |
|-------------------|----------|--------|----------|---|
| V\$NURR1_Q3       | NURR1    | NR4A2  | 0.359588 | 2 |
| V\$GLI2_01        | GLI2     | GLI2   | 0.242634 | 2 |
| V\$RORBETA_Q2     | RORBETA  | RORB   | 0.121526 | 2 |
| V\$GLI3_02        | GLI3     | GLI3   | 0.172244 | 2 |
| V\$ELF5_01        | ELF5     | ELF5   | 0.456788 | 2 |
| V\$CMAF_01        | c-Maf    | MAF    | 0.229772 | 2 |
| V\$MEIS1_01       | MEIS1    | MEIS1  | 0.14455  | 1 |
| V\$MYOGENIN_Q6_01 | myogenin | MYOG   | 0.281392 | 1 |
| V\$MEIS1_02       | Meis1    | MEIS1  | 0.14455  | 1 |
| V\$GLI3_01        | GLI3     | GLI3   | 0.172244 | 1 |
| V\$MATH1_Q2       | MATH1    | ATOH1  | 0.144391 | 1 |
| V\$AP4_Q5         | AP-4     | TFAP4  | 0.511992 | 1 |
| V\$AP4_01         | AP-4     | TFAP4  | 0.511992 | 1 |
| V\$AP4_Q6_02      | AP-4     | TFAP4  | 0.511992 | 1 |
| V\$STAF_02        | Staf     | ZNF143 | 0.270257 | 1 |
| V\$AP4_Q6         | AP-4     | TFAP4  | 0.511992 | 1 |

hsa-mir-30a

| Matrix_id      | transcription factor | Gene  | PCC       | Occurrence |
|----------------|----------------------|-------|-----------|------------|
| V\$PUR1_Q4     | PUR1                 | PURA  | 0.205624  | 59         |
| V\$GKLF_Q4     | GKLF                 | KLF4  | 0.402135  | 59         |
| V\$PEA3_Q6     | PEA3                 | ETV4  | 0.171281  | 59         |
| V\$PARP_Q4     | PARP                 | PARP1 | 0.136019  | 59         |
| V\$ELF1_Q6     | Elf-1                | ELF1  | 0.0946024 | 58         |
| V\$ETS1_B      | c-Ets-1              | ETS1  | 0.245229  | 56         |
| V\$CETS1_Q6    | C-ets-1              | ETS1  | 0.245229  | 55         |
| V\$ZIC3_01     | Zic3                 | ZIC3  | 0.296934  | 54         |
| V\$P300_01     | p300                 | EP300 | 0.428844  | 54         |
| V\$SMAD4_Q6_01 | Smad4                | SMAD4 | 0.325055  | 53         |
| V\$GABPA_Q4    | GABP-alpha           | GABPA | 0.401319  | 52         |
| V\$GATA1_01    | GATA-1               | GATA1 | 0.158639  | 51         |
| V\$ETS2_Q6     | c-Ets-2              | ETS2  | 0.145051  | 50         |
| V\$SPI1_Q5     | SPI1                 | SPI1  | 0.0408765 | 49         |
| V\$Elf5_03     | ELF5                 | ELF5  | 0.0327528 | 48         |
| V\$SPI1_03     | SPI1                 | SPI1  | 0.0408765 | 47         |
| V\$IPF1_Q6     | IPF1                 | PDX1  | 0.147068  | 46         |
| V\$GR_Q6       | GR                   | NR3C1 | 0.204562  | 46         |
| V\$YY1_01      | YY1                  | YY1   | 0.23408   | 46         |
| V\$NR1B2_Q6    | NR1B2                | RARB  | 0.23528   | 46         |
| V\$IPF1_Q4_01  | IPF1                 | PDX1  | 0.147068  | 45         |
| V\$TBP_Q6      | TBP                  | TBP   | 0.104342  | 45         |
| V\$CDX2_Q5_02  | CDX-2                | CDX2  | 0.114135  | 45         |

|                |            |        |            |    |
|----------------|------------|--------|------------|----|
| V\$AML1_Q6     | AML1       | RUNX1  | 0.188501   | 44 |
| V\$HNF4A_Q6_01 | HNF-4alpha | HNF4A  | 0.177764   | 44 |
| V\$GATA1_06    | GATA-1     | GATA1  | 0.158639   | 43 |
| V\$GATA2_02    | GATA-2     | GATA2  | 0.634761   | 43 |
| V\$NANOG_02    | Nanog      | NANOG  | 0.09471    | 43 |
| V\$GATA1_05    | GATA-1     | GATA1  | 0.158639   | 43 |
| V\$SMAD3_Q6_01 | Smad3      | SMAD3  | 0.125001   | 42 |
| V\$SOX5_01     | SOX5       | SOX5   | 0.059781   | 41 |
| V\$GATA1_02    | GATA-1     | GATA1  | 0.158639   | 40 |
| V\$LRF_Q2      | LRF        | ZBTB7A | 0.244722   | 40 |
| V\$DLX5_01     | dlx5       | DLX5   | 0.550939   | 40 |
| V\$IRF4_Q6     | IRF-4      | IRF4   | 0.188197   | 39 |
| V\$AP4_Q6_02   | AP-4       | TFAP4  | 0.12997    | 39 |
| V\$GATA3_02    | GATA-3     | GATA3  | 0.743018   | 38 |
| V\$YY1_Q6_02   | YY1        | YY1    | 0.23408    | 38 |
| V\$YY1_Q6      | YY1        | YY1    | 0.23408    | 37 |
| V\$CDX2_Q5_01  | Cdx-2      | CDX2   | 0.114135   | 37 |
| V\$IPF1_Q4     | IPF1       | PDX1   | 0.147068   | 37 |
| V\$FOXO3A_Q1   | FOXO3A     | FOXO3  | 0.07902    | 36 |
| V\$MAZ_Q6_01   | MAZ        | MAZ    | 0.132808   | 36 |
| V\$PARP_Q3     | PARP       | PARP1  | 0.136019   | 35 |
| V\$NFAT2_Q5    | NF-AT2     | NFATC1 | 0.0541603  | 35 |
| V\$MAZ_Q6      | MAZ        | MAZ    | 0.132808   | 35 |
| V\$CDX2_01     | Cdx-2      | CDX2   | 0.114135   | 35 |
| V\$TFII_Q6     | TFII-I     | GTF2I  | 0.373131   | 35 |
| V\$ING4_01     | ING4       | ING4   | 0.0387009  | 34 |
| V\$FKLF_Q5     | FKLF       | KLF11  | 0.260686   | 33 |
| V\$YY1_Q6_03   | YY1        | YY1    | 0.23408    | 33 |
| V\$HMGIIY_Q1   | HMGIIY     | HMGA1  | 0.175516   | 33 |
| V\$GATA1_04    | GATA-1     | GATA1  | 0.158639   | 33 |
| V\$GATA3_01    | GATA-3     | GATA3  | 0.743018   | 33 |
| V\$PITX3_Q2    | PITX3      | PITX3  | 0.0713503  | 32 |
| V\$GATA2_01    | GATA-2     | GATA2  | 0.634761   | 30 |
| V\$CEBPA_Q6    | C/EBPalpha | CEBPA  | 0.00798439 | 30 |
| V\$ELK1_Q2     | Elk-1      | ELK1   | 0.222954   | 30 |
| V\$TEL1_Q2     | TEL1       | ETV6   | 0.129457   | 30 |
| V\$AML1_Q1     | AML1a      | RUNX1  | 0.188501   | 29 |
| V\$ETV3_Q2     | ETV3       | ETV3   | 0.00225999 | 28 |
| V\$PITX2_Q2    | Pitx2      | PITX2  | 0.48608    | 28 |
| V\$AML1_Q4     | AML1       | RUNX1  | 0.188501   | 28 |
| V\$BCL6_Q3_01  | Bcl-6      | BCL6   | 0.0350918  | 28 |
| V\$CEBPE_Q6    | CEBPE      | CEBPE  | 0.335988   | 28 |
| V\$CRX_Q4      | Crx        | CRX    | 0.190496   | 28 |
| V\$PITX1_Q1    | Pitx1      | PITX1  | 0.0610827  | 27 |
| V\$CRX_Q2      | Crx        | CRX    | 0.190496   | 27 |
| V\$PITX2_Q1    | PITX2      | PITX2  | 0.48608    | 26 |

|               |            |              |            |    |
|---------------|------------|--------------|------------|----|
| V\$SMAD3_Q6   | SMAD3      | SMAD3        | 0.125001   | 26 |
| V\$ELK1_06    | ELK-1      | ELK1         | 0.222954   | 26 |
| V\$ETV7_01    | ETV7       | ETV7         | 0.206445   | 26 |
| V\$ER71_02    | ER71       | ETV2         | 0.245723   | 26 |
| V\$CP2_01     | CP2        | TFCP2        | 0.596106   | 25 |
| V\$TEF1_Q6_03 | TEF-1      | TEAD1        | 0.16238    | 25 |
| V\$CRX_Q4_01  | CRX        | CRX          | 0.190496   | 25 |
| V\$HNF1_02    | HNF-1alpha | HNF1A        | 0.194813   | 25 |
| V\$ESE1_Q3    | ESE-1      | ELF3         | 0.366871   | 24 |
| V\$TEF1_Q6    | TEF-1      | TEAD1        | 0.16238    | 23 |
| V\$ZABC1_01   | ZABC1      | ZNF217       | 0.555287   | 23 |
| V\$RFX1_02    | RFX1       | RFX1         | 0.134682   | 23 |
| V\$TCF3_01    | TCF-3      | TCF7L1       | 0.146726   | 23 |
| V\$CEBPB_02   | C/EBPbeta  | CEBPB        | 0.511608   | 23 |
| V\$ERF_02     | ERF        | ERF          | 0.0121565  | 21 |
| V\$YY1_02     | YY1        | YY1          | 0.23408    | 21 |
| V\$GATA3_03   | GATA-3     | GATA3        | 0.743018   | 21 |
| V\$PIT1_Q6    | Pit-1      | POU1F1       | 0.154687   | 20 |
| V\$OC2_Q3     | OC-2       | ONECUT2      | 0.155027   | 20 |
| V\$CEBPD_Q6   | C/EBPdelta | CEBPD        | 0.408926   | 19 |
| V\$GATA2_03   | GATA-2     | GATA2        | 0.634761   | 19 |
| V\$RFX1_01    | RFX1       | RFX1         | 0.134682   | 19 |
| V\$HBP1_Q2    | hbp1       | HBP1         | 0.517935   | 18 |
| V\$HOXD9_Q2   | Hoxd9      | HOXD9        | 0.0786879  | 18 |
| V\$CEBPB_Q6   | C/EBPbeta  | CEBPB        | 0.511608   | 17 |
| V\$ESE1_02    | ESE-1      | ELF3         | 0.366871   | 17 |
| V\$AP4_01     | AP-4       | TFAP4        | 0.12997    | 16 |
| V\$IRF1_Q6_01 | IRF-1      | IRF1         | 0.460819   | 16 |
| V\$IPF1_02    | IPF1       | PDX1         | 0.147068   | 15 |
| V\$CDX1_01    | Cdx-1      | CDX1         | 0.0712971  | 15 |
| V\$CEBPA_01   | C/EBPalpha | CEBPA        | 0.00798439 | 12 |
| V\$YY1_03     | YY1        | YY1          | 0.23408    | 12 |
| V\$CDP_04     | CDP        | CUX1         | 0.366261   | 11 |
| V\$FOXJ2_02   | FOXJ2      | FOXJ2        | 0.148898   | 10 |
| V\$CEBPB_01   | C/EBPbeta  | CEBPB        | 0.511608   | 9  |
| V\$OCT2_01    |            | 2-Oct POU2F2 | 0.273116   | 6  |
| V\$HNF1B_01   | HNF-1beta  | HNF1B        | 0.369541   | 5  |
| V\$IRF1_01    | IRF-1      | IRF1         | 0.460819   | 2  |

hsa-mir-30b

| Matrix_id  | transcription factor | Gene | PCC      | Occurrence |
|------------|----------------------|------|----------|------------|
| V\$PUR1_Q4 | PUR1                 | PURA | 0.153821 | 146        |

|                |            |        |           |     |
|----------------|------------|--------|-----------|-----|
| V\$PEA3_Q6     | PEA3       | ETV4   | 0.177397  | 144 |
| V\$GKLF_Q4     | GKLF       | KLF4   | 0.481599  | 142 |
| V\$PARP_Q4     | PARP       | PARP1  | 0.114808  | 142 |
| V\$ETS1_B      | c-Ets-1    | ETS1   | 0.350111  | 138 |
| V\$AP2REP_01   | AP-2rep    | KLF12  | 0.107431  | 136 |
| V\$P300_01     | p300       | EP300  | 0.407476  | 135 |
| V\$ZIC3_01     | Zic3       | ZIC3   | 0.252914  | 134 |
| V\$CETS1_Q6    | C-ets-1    | ETS1   | 0.350111  | 130 |
| V\$SMAD4_Q6_01 | Smad4      | SMAD4  | 0.38271   | 129 |
| V\$GATA1_01    | GATA-1     | GATA1  | 0.346727  | 126 |
| V\$Elf5_03     | ELF5       | ELF5   | 0.0203193 | 125 |
| V\$ETS2_Q6     | c-Ets-2    | ETS2   | 0.102137  | 124 |
| V\$GABPA_Q4    | GABP-alpha | GABPA  | 0.314906  | 123 |
| V\$ETS2_B      | c-Ets-2    | ETS2   | 0.102137  | 118 |
| V\$NR1B2_Q6    | NR1B2      | RARB   | 0.253828  | 118 |
| V\$HNF4A_Q6_01 | HNF-4alpha | HNF4A  | 0.139762  | 118 |
| V\$TBX5_02     | TBX5       | TBX5   | 0.345732  | 117 |
| V\$SPI1_Q5     | SPI1       | SPI1   | 0.0637004 | 115 |
| V\$SMAD3_Q6_01 | Smad3      | SMAD3  | 0.0559922 | 112 |
| V\$NANOG_02    | Nanog      | NANOG  | 0.0649465 | 111 |
| V\$AML1_Q6     | AML1       | RUNX1  | 0.293545  | 111 |
| V\$SPI1_03     | SPI1       | SPI1   | 0.0637004 | 109 |
| V\$YY1_01      | YY1        | YY1    | 0.20719   | 109 |
| V\$AP4_Q6_02   | AP-4       | TFAP4  | 0.0633867 | 104 |
| V\$MAZ_Q6      | MAZ        | MAZ    | 0.14265   | 103 |
| V\$LRF_Q2      | LRF        | ZBTB7A | 0.294432  | 101 |
| V\$YY1_Q6_02   | YY1        | YY1    | 0.20719   | 100 |
| V\$NKX32_01    | Nkx3-2     | NKX3-2 | 0.0211098 | 97  |
| V\$YY1_Q6      | YY1        | YY1    | 0.20719   | 97  |
| V\$GATA1_02    | GATA-1     | GATA1  | 0.346727  | 97  |
| V\$ING4_01     | ING4       | ING4   | 0.0715095 | 94  |
| V\$ERBETA_Q5   | ER-beta    | ESR2   | 0.152843  | 93  |
| V\$E2A_Q6      | E2A        | TCF3   | 0.132085  | 92  |
| V\$E12_Q6      | E12        | TCF3   | 0.132085  | 92  |
| V\$MYOD_Q6_01  | MyoD       | MYOD1  | 0.0227158 | 91  |
| V\$MYOGENIN_Q6 | myogenin   | MYOG   | 0.122277  | 91  |
| V\$E47_02      | E47        | TCF3   | 0.132085  | 91  |
| V\$SP1_Q6      | Sp1        | SP1    | 0.530806  | 87  |
| V\$GATA2_02    | GATA-2     | GATA2  | 0.652842  | 85  |
| V\$AP2ALPHA_Q6 | AP-2alpha  | TFAP2A | 0.853192  | 85  |
| V\$GATA1_05    | GATA-1     | GATA1  | 0.346727  | 85  |
| V\$GATA1_06    | GATA-1     | GATA1  | 0.346727  | 85  |
| V\$GATA6_01    | GATA-6     | GATA6  | 0.135435  | 85  |
| V\$GATA3_01    | GATA-3     | GATA3  | 0.738914  | 84  |
| V\$E2A_Q2      | E2A        | TCF3   | 0.132085  | 81  |
| V\$TFII_Q6     | TFII-I     | GTF2I  | 0.396029  | 79  |

|                   |            |         |            |    |
|-------------------|------------|---------|------------|----|
| V\$AP2ALPHA_01    | AP-2alpha  | TFAP2A  | 0.853192   | 79 |
| V\$SP1_Q6_01      | Sp1        | SP1     | 0.530806   | 79 |
| V\$GATA2_01       | GATA-2     | GATA2   | 0.652842   | 79 |
| V\$GATA1_04       | GATA-1     | GATA1   | 0.346727   | 78 |
| V\$NFAT2_Q5       | NF-AT2     | NFATC1  | 0.111695   | 77 |
| V\$SP1_Q4_01      | Sp1        | SP1     | 0.530806   | 75 |
| V\$CP2_01         | CP2        | TFCP2   | 0.535145   | 74 |
| V\$AP4_Q5         | AP-4       | TFAP4   | 0.0633867  | 74 |
| V\$FOXO3A_Q1      | FOXO3A     | FOXO3   | 0.00844199 | 74 |
| V\$SP1_Q2_01      | Sp1        | SP1     | 0.530806   | 74 |
| V\$PITX3_Q2       | PITX3      | PITX3   | 0.0219432  | 73 |
| V\$AML2_Q3        | AML2       | RUNX3   | 0.0481636  | 73 |
| V\$TCF3_01        | TCF-3      | TCF7L1  | 0.112805   | 71 |
| V\$GATA3_02       | GATA-3     | GATA3   | 0.738914   | 70 |
| V\$TEF1_Q6_03     | TEF-1      | TEAD1   | 0.162753   | 69 |
| V\$ARNT_01        | Arnt       | ARNT    | 0.549961   | 66 |
| V\$TEF1_Q6        | TEF-1      | TEAD1   | 0.162753   | 66 |
| V\$AP4_Q6         | AP-4       | TFAP4   | 0.0633867  | 66 |
| V\$MYOGENIN_Q6_01 | myogenin   | MYOG    | 0.122277   | 64 |
| V\$CRX_Q4         | Crx        | CRX     | 0.164671   | 62 |
| V\$ELF5_01        | ELF5       | ELF5    | 0.0203193  | 61 |
| V\$SMAD3_Q6       | SMAD3      | SMAD3   | 0.0559922  | 60 |
| V\$CEBPE_Q6       | CEBPE      | CEBPE   | 0.502775   | 59 |
| V\$DAX1_01        | Dax1       | NR0B1   | 0.0669372  | 58 |
| V\$AP2GAMMA_01    | AP-2gamma  | TFAP2C  | 0.736461   | 55 |
| V\$PITX1_01       | Pitx1      | PITX1   | 0.0443389  | 55 |
| V\$PITX2_01       | PITX2      | PITX2   | 0.488822   | 54 |
| V\$OC2_Q3         | OC-2       | ONECUT2 | 0.202946   | 54 |
| V\$MATH1_Q2       | MATH1      | ATOX1   | 0.0690456  | 54 |
| V\$CRX_Q4_01      | CRX        | CRX     | 0.164671   | 53 |
| V\$CRX_Q2         | Crx        | CRX     | 0.164671   | 50 |
| V\$SP2_01         | SP2        | SP2     | 0.423427   | 50 |
| V\$MYOD_Q6_02     | MyoD       | MYOD1   | 0.0227158  | 48 |
| V\$YY1_Q2         | YY1        | YY1     | 0.20719    | 46 |
| V\$SPIB_Q3        | Spi-B      | SPIB    | 0.131892   | 43 |
| V\$CEBPG_Q6_01    | C/EBPgamma | CEBPG   | 0.322518   | 41 |
| V\$P53_Q2         | p53        | TP53    | 0.561939   | 41 |
| V\$KAISO_Q1       | KAISO      | ZBTB33  | 0.14712    | 37 |
| V\$AP4_Q1         | AP-4       | TFAP4   | 0.0633867  | 35 |
| V\$RORBETA_Q2     | RORBETA    | RORB    | 0.0798613  | 32 |
| V\$NCX_Q2         | Ncx        | TLX2    | 0.132521   | 28 |
| V\$NMYC_Q1        | N-Myc      | MYCN    | 0.568005   | 21 |
| V\$MAX_Q1         | Max        | MAX     | 0.114148   | 21 |
| V\$CMYC_Q2        | c-Myc      | MYC     | 0.17121    | 21 |
| V\$USF2_Q6        | USF2       | USF2    | 0.0922049  | 21 |
| V\$ARNT_Q2        | Arnt       | ARNT    | 0.549961   | 21 |

|            |       |       |          |    |
|------------|-------|-------|----------|----|
| V\$ZID_01  | ZID   | ZBTB6 | 0.133683 | 20 |
| V\$SPIB_01 | SPI-B | SPIB  | 0.131892 | 17 |

hsa-mir-30c-1

| Matrix_id      | transcription factor | Gene   | PCC        | Occurrence |
|----------------|----------------------|--------|------------|------------|
| V\$PARP_Q4     | PARP                 | PARP1  | 0.117036   | 11         |
| V\$PEA3_Q6     | PEA3                 | ETV4   | 0.0465617  | 10         |
| V\$ETS2_Q6     | c-Ets-2              | ETS2   | 0.00354579 | 10         |
| V\$GATA1_04    | GATA-1               | GATA1  | 0.443552   | 10         |
| V\$GABPA_Q4    | GABP-alpha           | GABPA  | 0.341935   | 10         |
| V\$SPI1_Q5     | SPI1                 | SPI1   | 0.0398986  | 10         |
| V\$TBX5_02     | TBX5                 | TBX5   | 0.365512   | 10         |
| V\$GATA1_01    | GATA-1               | GATA1  | 0.443552   | 10         |
| V\$ZIC3_01     | Zic3                 | ZIC3   | 0.480506   | 10         |
| V\$ETS1_B      | c-Ets-1              | ETS1   | 0.524781   | 10         |
| V\$P300_01     | p300                 | EP300  | 0.279335   | 10         |
| V\$PUR1_Q4     | PUR1                 | PURA   | 0.151781   | 10         |
| V\$CETS1_Q6    | C-ets-1              | ETS1   | 0.524781   | 10         |
| V\$AP2REP_01   | AP-2rep              | KLF12  | 0.0998161  | 9          |
| V\$MAFB_01     | MAFB                 | MAFB   | 0.214208   | 9          |
| V\$NR1B2_Q6    | NR1B2                | RARB   | 0.362231   | 9          |
| V\$GATA1_02    | GATA-1               | GATA1  | 0.443552   | 9          |
| V\$LRF_Q2      | LRF                  | ZBTB7A | 0.360859   | 9          |
| V\$SOX5_01     | SOX5                 | SOX5   | 0.157286   | 9          |
| V\$SPI1_03     | SPI1                 | SPI1   | 0.0398986  | 9          |
| V\$ESE1_Q3     | ESE-1                | ELF3   | 0.191542   | 8          |
| V\$TBX5_01     | TBX5                 | TBX5   | 0.365512   | 8          |
| V\$GATA6_01    | GATA-6               | GATA6  | 0.145863   | 8          |
| V\$AML1_Q6     | AML1                 | RUNX1  | 0.276538   | 8          |
| V\$NKX32_01    | Nkx3-2               | NKX3-2 | 0.0119755  | 8          |
| V\$GATA3_02    | GATA-3               | GATA3  | 0.511997   | 8          |
| V\$GATA2_02    | GATA-2               | GATA2  | 0.420271   | 8          |
| V\$ERF_02      | ERF                  | ERF    | 0.263652   | 8          |
| V\$GATA3_01    | GATA-3               | GATA3  | 0.511997   | 8          |
| V\$ER71_02     | ER71                 | ETV2   | 0.544703   | 8          |
| V\$GATA2_01    | GATA-2               | GATA2  | 0.420271   | 8          |
| V\$HNF4A_Q6_01 | HNF-4alpha           | HNF4A  | 0.405462   | 8          |
| V\$ELK1_06     | ELK-1                | ELK1   | 0.336555   | 8          |
| V\$ING4_01     | ING4                 | ING4   | 0.231193   | 8          |
| V\$TEL1_02     | TEL1                 | ETV6   | 0.0558909  | 8          |
| V\$ETS2_B      | c-Ets-2              | ETS2   | 0.00354579 | 8          |
| V\$ELK1_02     | Elk-1                | ELK1   | 0.336555   | 8          |

|                |           |          |           |   |
|----------------|-----------|----------|-----------|---|
| V\$GATA1_05    | GATA-1    | GATA1    | 0.443552  | 8 |
| V\$GATA1_06    | GATA-1    | GATA1    | 0.443552  | 8 |
| V\$ETV3_02     | ETV3      | ETV3     | 0.247285  | 8 |
| V\$CDX2_Q5_02  | CDX-2     | CDX2     | 0.0773589 | 7 |
| V\$TBP_Q6      | TBP       | TBP      | 0.172819  | 7 |
| V\$AHR_Q5      | AhR       | AHR      | 0.458135  | 7 |
| V\$ETV7_01     | ETV7      | ETV7     | 0.188985  | 7 |
| V\$PARP_Q3     | PARP      | PARP1    | 0.117036  | 7 |
| V\$ERBETA_Q5   | ER-beta   | ESR2     | 0.175032  | 7 |
| V\$CDX2_01     | Cdx-2     | CDX2     | 0.0773589 | 7 |
| V\$GABPBETA_Q3 | GABP-beta | GABPB1   | 0.113317  | 7 |
| V\$YY1_Q6_03   | YY1       | YY1      | 0.0533827 | 7 |
| V\$AP4_Q6_02   | AP-4      | TFAP4    | 0.163986  | 7 |
| V\$CEBPE_Q6    | CEBPE     | CEBPE    | 0.698043  | 7 |
| V\$SP1_Q2_01   | Sp1       | SP1      | 0.425149  | 7 |
| V\$SP1_Q4_01   | Sp1       | SP1      | 0.425149  | 7 |
| V\$SP1_Q6_01   | Sp1       | SP1      | 0.425149  | 7 |
| V\$SP1_Q6      | Sp1       | SP1      | 0.425149  | 7 |
| V\$CP2_01      | CP2       | TFCP2    | 0.455918  | 7 |
| V\$VDR_Q3      | VDR       | VDR      | 0.316197  | 7 |
| V\$AP4_Q6      | AP-4      | TFAP4    | 0.163986  | 7 |
| V\$GR_Q6       | GR        | NR3C1    | 0.0926383 | 7 |
| V\$IRF4_Q6     | IRF-4     | IRF4     | 0.200228  | 6 |
| V\$IPF1_Q6     | IPF1      | PDX1     | 0.173078  | 6 |
| V\$DLX5_01     | dlx5      | DLX5     | 0.362244  | 6 |
| V\$BEN_01      | BEN       | GTF2IRD1 | 0.117714  | 6 |
| V\$SP1_01      | Sp1       | SP1      | 0.425149  | 6 |
| V\$YY1_01      | YY1       | YY1      | 0.0533827 | 6 |
| V\$ERR1_Q3     | ERR1      | ESRRA    | 0.474459  | 5 |
| V\$NKX22_02    | NKX2B     | NKX2-2   | 0.0324537 | 5 |
| V\$SP1_02      | SP1       | SP1      | 0.425149  | 5 |
| V\$CDX2_Q5_01  | Cdx-2     | CDX2     | 0.0773589 | 5 |
| V\$DAX1_01     | Dax1      | NR0B1    | 0.0584798 | 5 |
| V\$ZIC1_01     | Zic1      | ZIC1     | 0.0313765 | 5 |
| V\$NANOG_02    | Nanog     | NANOG    | 0.0216817 | 5 |
| V\$TEF1_Q6_03  | TEF-1     | TEAD1    | 0.144685  | 5 |
| V\$IPF1_01     | IPF1      | PDX1     | 0.173078  | 5 |
| V\$GR_01       | GR        | NR3C1    | 0.0926383 | 5 |
| V\$OC2_Q3      | OC-2      | ONECUT2  | 0.324418  | 5 |
| V\$YY1_Q6_02   | YY1       | YY1      | 0.0533827 | 5 |
| V\$GFI1_Q6     | Gfi1      | GFI1     | 0.0385197 | 5 |
| V\$ESE1_02     | ESE-1     | ELF3     | 0.191542  | 5 |
| V\$RFX1_01     | RFX1      | RFX1     | 0.0790295 | 5 |
| V\$RFX1_02     | RFX1      | RFX1     | 0.0790295 | 5 |
| V\$GFI1_Q6_01  | Gfi1      | GFI1     | 0.0385197 | 5 |
| V\$ELF5_01     | ELF5      | ELF5     | 0.114596  | 5 |

|                |            |              |            |   |
|----------------|------------|--------------|------------|---|
| V\$TEF1_Q6     | TEF-1      | TEAD1        | 0.144685   | 5 |
| V\$HOXD9_Q2    | Hoxd9      | HOXD9        | 0.232327   | 4 |
| V\$CDX1_01     | Cdx-1      | CDX1         | 0.0919045  | 4 |
| V\$GATA2_03    | GATA-2     | GATA2        | 0.420271   | 4 |
| V\$MSX1_01     | Msx-1      | MSX1         | 0.0785742  | 4 |
| V\$STAT4_Q5    | STAT4      | STAT4        | 0.142192   | 4 |
| V\$P53_Q2      | p53        | TP53         | 0.387158   | 4 |
| V\$CEBPG_Q6_01 | C/EBPgamma | CEBPG        | 0.109431   | 4 |
| V\$NFAT2_Q5    | NF-AT2     | NFATC1       | 0.0756145  | 4 |
| V\$TCF4_01     | TCF-4      | TCF7L2       | 0.0763432  | 4 |
| V\$FOXO4_Q2    | FOXO4      | FOXO4        | 0.647267   | 4 |
| V\$AP2ALPHA_Q2 | AP-2alphaA | TFAP2A       | 0.612433   | 4 |
| V\$HMG1Y_01    | HMG1Y      | HMGA1        | 0.0915854  | 4 |
| V\$YY1_Q6      | YY1        | YY1          | 0.0533827  | 4 |
| V\$GFI1B_Q1    | Gfi1b      | GFI1B        | 0.186411   | 4 |
| V\$CMF1_Q1     | c-Maf      | MAF          | 0.364913   | 4 |
| V\$HBP1_Q2     | hbp1       | HBP1         | 0.194312   | 4 |
| V\$CDX2_Q5     | Cdx-2      | CDX2         | 0.0773589  | 3 |
| V\$HOXA9_Q1    | hoxa9      | HOXA9        | 0.14679    | 3 |
| V\$CIZ_Q1      | CIZ        | ZNF384       | 0.338769   | 3 |
| V\$PET1_Q2     | Pet-1      | FEV          | 0.0999727  | 3 |
| V\$CRX_Q4_Q1   | CRX        | CRX          | 0.254824   | 3 |
| V\$NKX32_Q2    | Nkx3-2     | NKX3-2       | 0.0119755  | 3 |
| V\$TCF3_Q1     | TCF-3      | TCF7L1       | 0.203975   | 3 |
| V\$PIT1_Q6     | Pit-1      | POU1F1       | 0.423663   | 3 |
| V\$AR_Q3       | AR         | AR           | 0.0113955  | 3 |
| V\$ELK1_Q1     | Elk-1      | ELK1         | 0.336555   | 2 |
| V\$AML1_Q1     | AML1a      | RUNX1        | 0.276538   | 2 |
| V\$YY1_Q3      | YY1        | YY1          | 0.0533827  | 2 |
| V\$AR_Q2       | AR         | AR           | 0.0113955  | 2 |
| V\$POU3F2_Q1   | POU3F2     | POU3F2       | 0.0961158  | 2 |
| V\$CRX_Q4      | Crx        | CRX          | 0.254824   | 2 |
| V\$CEBPG_Q6    | C/EBPgamma | CEBPG        | 0.109431   | 2 |
| V\$AML2_Q1     | AML2       | RUNX3        | 0.0657713  | 2 |
| V\$AML1_Q4     | AML1       | RUNX1        | 0.276538   | 2 |
| V\$OCT2_Q1     |            | 2-Oct POU2F2 | 0.358288   | 2 |
| V\$GATA3_Q3    | GATA-3     | GATA3        | 0.511997   | 2 |
| V\$CTCF_Q1     | CTCF       | CTCF         | 0.0430055  | 1 |
| V\$HLF_Q1      | HLF        | HLF          | 0.190744   | 1 |
| V\$PAX3_B      | Pax-3      | PAX3         | 0.391964   | 1 |
| V\$IRF1_Q6_Q1  | IRF-1      | IRF1         | 0.387561   | 1 |
| V\$CTCF_Q2     | CTCF       | CTCF         | 0.0430055  | 1 |
| V\$GRE_C       | GR         | NR3C1        | 0.0926383  | 1 |
| V\$AFP1_Q6     | AFP1       | ZFH3         | 0.00659987 | 1 |
| V\$PAX8_Q1     | Pax-8      | PAX8         | 0.166413   | 1 |
| V\$LHX3b_Q1    | LHX3b      | LHX3         | 0.294303   | 1 |



hsa-mir-30c-2

| Matrix_id      | transcription factor | Gene   | PCC        | Occurrence |
|----------------|----------------------|--------|------------|------------|
| V\$SMAD4_Q6_01 | Smad4                | SMAD4  | 0.263174   | 11         |
| V\$PARP_Q4     | PARP                 | PARP1  | 0.117036   | 11         |
| V\$GKLF_Q4     | GKLF                 | KLF4   | 0.191386   | 11         |
| V\$Elf5_Q3     | ELF5                 | ELF5   | 0.114596   | 10         |
| V\$ETS2_Q6     | c-Ets-2              | ETS2   | 0.00354579 | 10         |
| V\$PEA3_Q6     | PEA3                 | ETV4   | 0.0465617  | 10         |
| V\$ETS1_B      | c-Ets-1              | ETS1   | 0.524781   | 10         |
| V\$ZIC3_Q1     | Zic3                 | ZIC3   | 0.480506   | 10         |
| V\$SPI1_Q5     | SPI1                 | SPI1   | 0.0398986  | 10         |
| V\$GATA1_Q4    | GATA-1               | GATA1  | 0.443552   | 10         |
| V\$PUR1_Q4     | PUR1                 | PURA   | 0.151781   | 10         |
| V\$SMAD3_Q6_01 | Smad3                | SMAD3  | 0.029369   | 10         |
| V\$GABPA_Q4    | GABP-alpha           | GABPA  | 0.341935   | 10         |
| V\$CETS1_Q6    | C-ets-1              | ETS1   | 0.524781   | 10         |
| V\$P300_Q1     | p300                 | EP300  | 0.279335   | 10         |
| V\$GATA1_Q1    | GATA-1               | GATA1  | 0.443552   | 10         |
| V\$MAZ_Q6      | MAZ                  | MAZ    | 0.420309   | 9          |
| V\$SMAD3_Q6    | SMAD3                | SMAD3  | 0.029369   | 9          |
| V\$SOX5_Q1     | SOX5                 | SOX5   | 0.157286   | 9          |
| V\$LRF_Q2      | LRF                  | ZBTB7A | 0.360859   | 9          |
| V\$SPI1_Q3     | SPI1                 | SPI1   | 0.0398986  | 9          |
| V\$NR1B2_Q6    | NR1B2                | RARB   | 0.362231   | 9          |
| V\$FKLF_Q5     | FKLF                 | KLF11  | 0.277643   | 9          |
| V\$GATA1_Q2    | GATA-1               | GATA1  | 0.443552   | 9          |
| V\$TFII_Q6     | TFII-I               | GTF2I  | 0.492362   | 9          |
| V\$ESE1_Q3     | ESE-1                | ELF3   | 0.191542   | 8          |
| V\$AML2_Q3     | AML2                 | RUNX3  | 0.0657713  | 8          |
| V\$HNF4A_Q6_01 | HNF-4alpha           | HNF4A  | 0.405462   | 8          |
| V\$ING4_Q1     | ING4                 | ING4   | 0.231193   | 8          |
| V\$AML1_Q6     | AML1                 | RUNX1  | 0.276538   | 8          |
| V\$MAZ_Q6_01   | MAZ                  | MAZ    | 0.420309   | 8          |
| V\$ELK1_Q6     | ELK-1                | ELK1   | 0.336555   | 8          |
| V\$GATA2_Q1    | GATA-2               | GATA2  | 0.420271   | 8          |
| V\$GATA3_Q1    | GATA-3               | GATA3  | 0.511997   | 8          |
| V\$GATA1_Q6    | GATA-1               | GATA1  | 0.443552   | 8          |
| V\$TEL1_Q2     | TEL1                 | ETV6   | 0.0558909  | 8          |
| V\$GATA3_Q2    | GATA-3               | GATA3  | 0.511997   | 8          |
| V\$ETV3_Q2     | ETV3                 | ETV3   | 0.247285   | 8          |
| V\$GATA1_Q5    | GATA-1               | GATA1  | 0.443552   | 8          |

|               |            |         |           |   |
|---------------|------------|---------|-----------|---|
| V\$ER71_02    | ER71       | ETV2    | 0.544703  | 8 |
| V\$ELK1_02    | Elk-1      | ELK1    | 0.336555  | 8 |
| V\$GATA6_01   | GATA-6     | GATA6   | 0.145863  | 8 |
| V\$ERF_02     | ERF        | ERF     | 0.263652  | 8 |
| V\$GATA2_02   | GATA-2     | GATA2   | 0.420271  | 8 |
| V\$ETV7_01    | ETV7       | ETV7    | 0.188985  | 7 |
| V\$GR_Q6      | GR         | NR3C1   | 0.0926383 | 7 |
| V\$CDX2_Q5_02 | CDX-2      | CDX2    | 0.0773589 | 7 |
| V\$CEBPE_Q6   | CEBPE      | CEBPE   | 0.698043  | 7 |
| V\$CDX2_01    | Cdx-2      | CDX2    | 0.0773589 | 7 |
| V\$CEBPA_Q6   | C/EBPalpha | CEBPA   | 0.0526319 | 7 |
| V\$CP2_01     | CP2        | TFCP2   | 0.455918  | 7 |
| V\$AP4_Q6_02  | AP-4       | TFAP4   | 0.163986  | 7 |
| V\$TBP_Q6     | TBP        | TBP     | 0.172819  | 7 |
| V\$YY1_Q6_03  | YY1        | YY1     | 0.0533827 | 7 |
| V\$PARP_Q3    | PARP       | PARP1   | 0.117036  | 7 |
| V\$YY1_01     | YY1        | YY1     | 0.0533827 | 6 |
| V\$CEBPD_Q6   | C/EBPdelta | CEBPD   | 0.178651  | 6 |
| V\$IPF1_Q4_01 | IPF1       | PDX1    | 0.173078  | 6 |
| V\$IRF4_Q6    | IRF-4      | IRF4    | 0.200228  | 6 |
| V\$DLX5_01    | dlx5       | DLX5    | 0.362244  | 6 |
| V\$IPF1_Q6    | IPF1       | PDX1    | 0.173078  | 6 |
| V\$SOX10_Q6   | SOX10      | SOX10   | 0.028698  | 6 |
| V\$GFI1_Q6    | Gfi1       | GFI1    | 0.0385197 | 5 |
| V\$DAX1_01    | Dax1       | NR0B1   | 0.0584798 | 5 |
| V\$IPF1_Q4    | IPF1       | PDX1    | 0.173078  | 5 |
| V\$TEF1_Q6_03 | TEF-1      | TEAD1   | 0.144685  | 5 |
| V\$RFX1_02    | RFX1       | RFX1    | 0.0790295 | 5 |
| V\$CDX2_Q5_01 | Cdx-2      | CDX2    | 0.0773589 | 5 |
| V\$OC2_Q3     | OC-2       | ONECUT2 | 0.324418  | 5 |
| V\$RFX1_01    | RFX1       | RFX1    | 0.0790295 | 5 |
| V\$CEBPB_Q6   | C/EBPbeta  | CEBPB   | 0.294498  | 5 |
| V\$ESE1_02    | ESE-1      | ELF3    | 0.191542  | 5 |
| V\$TEF1_Q6    | TEF-1      | TEAD1   | 0.144685  | 5 |
| V\$CEBPB_Q6   | C/EBPbeta  | CEBPB   | 0.294498  | 5 |
| V\$YY1_Q6_02  | YY1        | YY1     | 0.0533827 | 5 |
| V\$NANOG_Q2   | Nanog      | NANOG   | 0.0216817 | 5 |
| V\$HOXD9_Q2   | Hoxd9      | HOXD9   | 0.232327  | 4 |
| V\$ZABC1_01   | ZABC1      | ZNF217  | 0.248168  | 4 |
| V\$CDX1_01    | Cdx-1      | CDX1    | 0.0919045 | 4 |
| V\$HMG1Y_Q1   | HMG1Y      | HMGA1   | 0.0915854 | 4 |
| V\$IPF1_Q2    | IPF1       | PDX1    | 0.173078  | 4 |
| V\$YY1_Q6     | YY1        | YY1     | 0.0533827 | 4 |
| V\$GATA2_Q3   | GATA-2     | GATA2   | 0.420271  | 4 |
| V\$HBP1_Q2    | hbp1       | HBP1    | 0.194312  | 4 |
| V\$CEBPA_Q1   | C/EBPalpha | CEBPA   | 0.0526319 | 4 |

|               |            |              |           |   |
|---------------|------------|--------------|-----------|---|
| V\$NFAT2_Q5   | NF-AT2     | NFATC1       | 0.0756145 | 4 |
| V\$PIT1_Q6    | Pit-1      | POU1F1       | 0.423663  | 3 |
| V\$PITX3_Q2   | PITX3      | PITX3        | 0.0904877 | 3 |
| V\$YY1_Q2     | YY1        | YY1          | 0.0533827 | 3 |
| V\$HNF1_Q2    | HNF-1alpha | HNF1A        | 0.347324  | 3 |
| V\$TCF3_Q1    | TCF-3      | TCF7L1       | 0.203975  | 3 |
| V\$CRX_Q4_Q1  | CRX        | CRX          | 0.254824  | 3 |
| V\$FOXJ2_Q2   | FOXJ2      | FOXJ2        | 0.106583  | 2 |
| V\$GATA3_Q3   | GATA-3     | GATA3        | 0.511997  | 2 |
| V\$CRX_Q4     | Crx        | CRX          | 0.254824  | 2 |
| V\$AML1_Q4    | AML1       | RUNX1        | 0.276538  | 2 |
| V\$YY1_Q3     | YY1        | YY1          | 0.0533827 | 2 |
| V\$AP4_Q1     | AP-4       | TFAP4        | 0.163986  | 2 |
| V\$AML1_Q1    | AML1a      | RUNX1        | 0.276538  | 2 |
| V\$CEBPB_Q1   | C/EBPbeta  | CEBPB        | 0.294498  | 2 |
| V\$CDP_Q4     | CDP        | CUX1         | 0.261056  | 2 |
| V\$OCT2_Q1    |            | 2-Oct POU2F2 | 0.358288  | 2 |
| V\$AML2_Q1    | AML2       | RUNX3        | 0.0657713 | 2 |
| V\$HNF1B_Q1   | HNF-1beta  | HNF1B        | 0.351188  | 1 |
| V\$PITX2_Q2   | Pitx2      | PITX2        | 0.320224  | 1 |
| V\$ATF5_Q1    | ATF5       | ATF5         | 0.0260239 | 1 |
| V\$PITX1_Q1   | Pitx1      | PITX1        | 0.0064856 | 1 |
| V\$PITX2_Q1   | PITX2      | PITX2        | 0.320224  | 1 |
| V\$CRX_Q2     | Crx        | CRX          | 0.254824  | 1 |
| V\$IRF1_Q6_Q1 | IRF-1      | IRF1         | 0.387561  | 1 |
| V\$IRF1_Q1    | IRF-1      | IRF1         | 0.387561  | 1 |

hsa-mir-30d

| Matrix_id      | transcription factor | Gene  | PCC       | Occurrence |
|----------------|----------------------|-------|-----------|------------|
| V\$PUR1_Q4     | PUR1                 | PURA  | 0.175534  | 269        |
| V\$PEA3_Q6     | PEA3                 | ETV4  | 0.130508  | 263        |
| V\$PARP_Q4     | PARP                 | PARP1 | 0.115786  | 261        |
| V\$ELF1_Q6     | Elf-1                | ELF1  | 0.120131  | 256        |
| V\$GKLF_Q4     | GKLF                 | KLF4  | 0.559967  | 254        |
| V\$P300_Q1     | p300                 | EP300 | 0.394081  | 242        |
| V\$ZIC3_Q1     | Zic3                 | ZIC3  | 0.0117067 | 241        |
| V\$ETS1_B      | c-Ets-1              | ETS1  | 0.178271  | 238        |
| V\$CETS1_Q6    | C-ets-1              | ETS1  | 0.178271  | 232        |
| V\$SMAD4_Q6_Q1 | Smad4                | SMAD4 | 0.330104  | 226        |
| V\$NR1B2_Q6    | NR1B2                | RARB  | 0.0515325 | 223        |
| V\$ETS2_Q6     | c-Ets-2              | ETS2  | 0.0837523 | 221        |
| V\$GABPA_Q4    | GABP-alpha           | GABPA | 0.380104  | 220        |

|                   |            |         |            |     |
|-------------------|------------|---------|------------|-----|
| V\$GATA1_01       | GATA-1     | GATA1   | 0.146934   | 218 |
| V\$TBX5_02        | TBX5       | TBX5    | 0.194463   | 212 |
| V\$YY1_01         | YY1        | YY1     | 0.329077   | 204 |
| V\$SPI1_Q5        | SPI1       | SPI1    | 0.0111963  | 203 |
| V\$ETS2_B         | c-Ets-2    | ETS2    | 0.0837523  | 203 |
| V\$SPI1_03        | SPI1       | SPI1    | 0.0111963  | 198 |
| V\$SMAD3_Q6_01    | Smad3      | SMAD3   | 0.0101463  | 198 |
| V\$AML1_Q6        | AML1       | RUNX1   | 0.121086   | 193 |
| V\$MAZ_Q6         | MAZ        | MAZ     | 0.00748807 | 185 |
| V\$YY1_Q6         | YY1        | YY1     | 0.329077   | 184 |
| V\$YY1_Q6_02      | YY1        | YY1     | 0.329077   | 184 |
| V\$LRF_Q2         | LRF        | ZBTB7A  | 0.117021   | 184 |
| V\$GATA1_02       | GATA-1     | GATA1   | 0.146934   | 180 |
| V\$GATA1_05       | GATA-1     | GATA1   | 0.146934   | 168 |
| V\$GATA1_06       | GATA-1     | GATA1   | 0.146934   | 168 |
| V\$GATA2_02       | GATA-2     | GATA2   | 0.721457   | 168 |
| V\$ERBETA_Q5      | ER-beta    | ESR2    | 0.101024   | 167 |
| V\$ING4_01        | ING4       | ING4    | 0.103379   | 166 |
| V\$E12_Q6         | E12        | TCF3    | 0.0187866  | 164 |
| V\$E2A_Q6         | E2A        | TCF3    | 0.0187866  | 164 |
| V\$E47_02         | E47        | TCF3    | 0.0187866  | 162 |
| V\$SP1_Q6         | Sp1        | SP1     | 0.436665   | 158 |
| V\$AP2ALPHA_Q6    | AP-2alpha  | TFAP2A  | 0.95564    | 155 |
| V\$GATA1_04       | GATA-1     | GATA1   | 0.146934   | 153 |
| V\$MYOGENIN_Q6    | myogenin   | MYOG    | 0.0113833  | 149 |
| V\$GATA3_01       | GATA-3     | GATA3   | 0.886369   | 147 |
| V\$AP2ALPHA_01    | AP-2alpha  | TFAP2A  | 0.95564    | 145 |
| V\$GATA3_02       | GATA-3     | GATA3   | 0.886369   | 145 |
| V\$SP1_Q6_01      | Sp1        | SP1     | 0.436665   | 144 |
| V\$FOXO3A_Q1      | FOXO3A     | FOXO3   | 0.023021   | 144 |
| V\$TFII-I_Q6      | TFII-I     | GTF2I   | 0.193407   | 142 |
| V\$SREBP1_Q6      | SREBP-1    | SREBF1  | 0.0892681  | 139 |
| V\$E2A_Q2         | E2A        | TCF3    | 0.0187866  | 139 |
| V\$SP1_Q4_01      | Sp1        | SP1     | 0.436665   | 138 |
| V\$SP1_Q2_01      | Sp1        | SP1     | 0.436665   | 136 |
| V\$ARNT_01        | Arnt       | ARNT    | 0.4258     | 134 |
| V\$GATA2_01       | GATA-2     | GATA2   | 0.721457   | 134 |
| V\$TEF1_Q6_03     | TEF-1      | TEAD1   | 0.0473578  | 131 |
| V\$TEF1_Q6        | TEF-1      | TEAD1   | 0.0473578  | 125 |
| V\$CEBPE_Q6       | CEBPE      | CEBPE   | 0.202622   | 121 |
| V\$CEBPA_Q6       | C/EBPalpha | CEBPA   | 0.0605995  | 117 |
| V\$OC2_Q3         | OC-2       | ONECUT2 | 0.00740365 | 112 |
| V\$MYOGENIN_Q6_01 | myogenin   | MYOG    | 0.0113833  | 110 |
| V\$PITX2_01       | PITX2      | PITX2   | 0.48746    | 109 |
| V\$CP2_01         | CP2        | TFCP2   | 0.575217   | 107 |
| V\$AP2GAMMA_01    | AP-2gamma  | TFAP2C  | 0.865652   | 106 |

|                |            |         |            |     |
|----------------|------------|---------|------------|-----|
| V\$SP2_01      | SP2        | SP2     | 0.281322   | 100 |
| V\$SMAD3_Q6    | SMAD3      | SMAD3   | 0.0101463  | 99  |
| V\$NEUROD_02   | NeuroD     | NEUROD1 | 0.00943963 | 96  |
| V\$CEBPG_Q6_01 | C/EBPgamma | CEBPG   | 0.518326   | 82  |
| V\$YY1_02      | YY1        | YY1     | 0.329077   | 80  |
| V\$KAISO_01    | KAISO      | ZBTB33  | 0.00896647 | 72  |
| V\$P53_02      | p53        | TP53    | 0.620772   | 70  |
| V\$NCX_02      | Ncx        | TLX2    | 0.0145846  | 66  |
| V\$RORBETA_Q2  | RORBETA    | RORB    | 0.0184015  | 55  |
| V\$ARNT_02     | Arnt       | ARNT    | 0.4258     | 45  |
| V\$NMYC_01     | N-Myc      | MYCN    | 0.576199   | 45  |
| V\$MAX_01      | Max        | MAX     | 0.0880738  | 43  |
| V\$CMYC_02     | c-Myc      | MYC     | 0.357202   | 42  |
| V\$ZID_01      | ZID        | ZBTB6   | 0.195389   | 29  |
| V\$SREBP1_01   | SREBP-1    | SREBF1  | 0.0892681  | 21  |

hsa-mir-30e

| Matrix_id      | transcription factor | Gene   | PCC       | Occurrence |
|----------------|----------------------|--------|-----------|------------|
| V\$MAFB_01     | MAFB                 | MAFB   | 0.11071   | 88         |
| V\$AP2REP_01   | AP-2rep              | KLF12  | 0.13813   | 87         |
| V\$GATA1_01    | GATA-1               | GATA1  | 0.60261   | 87         |
| V\$ZIC3_01     | Zic3                 | ZIC3   | 0.0963733 | 86         |
| V\$TBP_Q6      | TBP                  | TBP    | 0.0731733 | 80         |
| V\$CDX2_Q5_02  | CDX-2                | CDX2   | 0.0351697 | 80         |
| V\$TBX5_02     | TBX5                 | TBX5   | 0.403674  | 80         |
| V\$AML1_Q6     | AML1                 | RUNX1  | 0.27408   | 76         |
| V\$NR1B2_Q6    | NR1B2                | RARB   | 0.305332  | 76         |
| V\$CETS1_Q6    | C-ets-1              | ETS1   | 0.62958   | 75         |
| V\$ETS1_B      | c-Ets-1              | ETS1   | 0.62958   | 72         |
| V\$GABPA_Q4    | GABP-alpha           | GABPA  | 0.0814976 | 70         |
| V\$HNF4A_Q6_01 | HNF-4alpha           | HNF4A  | 0.440155  | 70         |
| V\$TBX5_01     | TBX5                 | TBX5   | 0.403674  | 65         |
| V\$ING4_01     | ING4                 | ING4   | 0.227516  | 62         |
| V\$SPI1_03     | SPI1                 | SPI1   | 0.303594  | 61         |
| V\$IPF1_Q6     | IPF1                 | PDX1   | 0.0870329 | 61         |
| V\$ERBETA_Q5   | ER-beta              | ESR2   | 0.120071  | 60         |
| V\$NKX32_01    | Nkx3-2               | NKX3-2 | 0.0238231 | 60         |
| V\$SPI1_Q5     | SPI1                 | SPI1   | 0.303594  | 59         |
| V\$LRF_Q2      | LRF                  | ZBTB7A | 0.356303  | 59         |
| V\$GATA6_01    | GATA-6               | GATA6  | 0.435222  | 59         |
| V\$GATA1_06    | GATA-1               | GATA1  | 0.60261   | 59         |
| V\$GATA1_05    | GATA-1               | GATA1  | 0.60261   | 59         |

|               |        |          |            |    |
|---------------|--------|----------|------------|----|
| V\$SOX5_01    | SOX5   | SOX5     | 0.175253   | 58 |
| V\$CDX2_01    | Cdx-2  | CDX2     | 0.0351697  | 58 |
| V\$CDX2_Q5_01 | Cdx-2  | CDX2     | 0.0351697  | 58 |
| V\$BEN_01     | BEN    | GTF2IRD1 | 0.00655114 | 57 |
| V\$SP1_Q6     | Sp1    | SP1      | 0.176856   | 57 |
| V\$SP1_01     | Sp1    | SP1      | 0.176856   | 56 |
| V\$NFAT2_Q5   | NF-AT2 | NFATC1   | 0.0986876  | 54 |
| V\$GATA1_02   | GATA-1 | GATA1    | 0.60261    | 53 |
| V\$TEL1_02    | TEL1   | ETV6     | 0.0037906  | 51 |
| V\$ELK1_02    | Elk-1  | ELK1     | 0.151045   | 51 |
| V\$CRX_Q4     | Crx    | CRX      | 0.259786   | 50 |
| V\$ETV3_02    | ETV3   | ETV3     | 0.686398   | 50 |
| V\$SP1_Q6_01  | Sp1    | SP1      | 0.176856   | 49 |
| V\$ER71_02    | ER71   | ETV2     | 0.65428    | 49 |
| V\$ELK1_06    | ELK-1  | ELK1     | 0.151045   | 49 |
| V\$ERF_02     | ERF    | ERF      | 0.546946   | 48 |
| V\$GATA1_04   | GATA-1 | GATA1    | 0.60261    | 47 |
| V\$ETV7_01    | ETV7   | ETV7     | 0.0664378  | 47 |
| V\$IRF4_Q6    | IRF-4  | IRF4     | 0.0635086  | 47 |
| V\$IPF1_01    | IPF1   | PDX1     | 0.0870329  | 46 |
| V\$GFI1_Q6    | Gfi1   | GFI1     | 0.0566     | 46 |
| V\$SP1_Q4_01  | Sp1    | SP1      | 0.176856   | 46 |
| V\$SP1_Q2_01  | Sp1    | SP1      | 0.176856   | 46 |
| V\$TCF3_01    | TCF-3  | TCF7L1   | 0.234369   | 45 |
| V\$SP1_02     | SP1    | SP1      | 0.176856   | 44 |
| V\$TEF1_Q6_03 | TEF-1  | TEAD1    | 0.038797   | 44 |
| V\$GFI1_Q6_01 | Gfi1   | GFI1     | 0.0566     | 44 |
| V\$ERR1_Q3    | ERR1   | ESRRA    | 0.494654   | 42 |
| V\$TEF1_Q6    | TEF-1  | TEAD1    | 0.038797   | 41 |
| V\$AML1_01    | AML1a  | RUNX1    | 0.27408    | 41 |
| V\$ELF5_01    | ELF5   | ELF5     | 0.196616   | 40 |
| V\$GFI1B_01   | Gfi1b  | GFI1B    | 0.295415   | 39 |
| V\$NKX22_02   | NKX2B  | NKX2-2   | 0.0169419  | 37 |
| V\$PET1_02    | Pet-1  | FEV      | 0.0903668  | 36 |
| V\$VDR_Q3     | VDR    | VDR      | 0.201648   | 36 |
| V\$AML1_Q4    | AML1   | RUNX1    | 0.27408    | 36 |
| V\$KLF15_Q2   | KLF15  | KLF15    | 0.0508774  | 35 |
| V\$OC2_Q3     | OC-2   | ONECUT2  | 0.355734   | 33 |
| V\$CRX_Q4_01  | CRX    | CRX      | 0.259786   | 29 |
| V\$NKX32_02   | Nkx3-2 | NKX3-2   | 0.0238231  | 28 |
| V\$DAX1_01    | Dax1   | NR0B1    | 0.0926887  | 28 |
| V\$ELK1_01    | Elk-1  | ELK1     | 0.151045   | 28 |
| V\$CEBPE_Q6   | CEBPE  | CEBPE    | 0.851436   | 27 |
| V\$DBP_Q6_01  | DBP    | DBP      | 0.0325909  | 26 |
| V\$CDX1_01    | Cdx-1  | CDX1     | 0.294083   | 26 |
| V\$HOXD9_Q2   | Hoxd9  | HOXD9    | 0.239078   | 26 |

|                |            |              |           |    |
|----------------|------------|--------------|-----------|----|
| V\$LHX3b_01    | LHX3b      | LHX3         | 0.211574  | 26 |
| V\$P53_02      | p53        | TP53         | 0.0754324 | 25 |
| V\$AML2_01     | AML2       | RUNX3        | 0.423991  | 24 |
| V\$PIT1_Q6     | Pit-1      | POU1F1       | 0.588843  | 23 |
| V\$CDX2_Q5     | Cdx-2      | CDX2         | 0.0351697 | 22 |
| V\$STAT4_Q5    | STAT4      | STAT4        | 0.0982247 | 22 |
| V\$IRF1_Q6_01  | IRF-1      | IRF1         | 0.279224  | 20 |
| V\$PAX3_B      | Pax-3      | PAX3         | 0.528841  | 17 |
| V\$AP2ALPHA_02 | AP-2alphaA | TFAP2A       | 0.0158611 | 16 |
| V\$CIZ_01      | CIZ        | ZNF384       | 0.127713  | 14 |
| V\$AR_03       | AR         | AR           | 0.399035  | 13 |
| V\$OCT2_01     |            | 2-Oct POU2F2 | 0.227112  | 8  |
| V\$AR_Q2       | AR         | AR           | 0.399035  | 5  |
| V\$POU3F2_01   | POU3F2     | POU3F2       | 0.12024   | 3  |

hsa-mir-31

| Matrix_id      | transcription factor | Gene  | PCC        | Occurrence |
|----------------|----------------------|-------|------------|------------|
| V\$P300_01     | p300                 | EP300 | 0.181118   | 4          |
| V\$MAFB_01     | MAFB                 | MAFB  | 0.164461   | 4          |
| V\$TBP_Q6      | TBP                  | TBP   | 0.16974    | 4          |
| V\$ETS1_B      | c-Ets-1              | ETS1  | 0.0520794  | 4          |
| V\$ELF1_Q6     | Elf-1                | ELF1  | 0.452258   | 4          |
| V\$SMAD4_Q6_01 | Smad4                | SMAD4 | 0.195766   | 4          |
| V\$SRY_02      | SRY                  | SRY   | 0.00045333 | 4          |
| V\$PUR1_Q4     | PUR1                 | PURA  | 0.385098   | 4          |
| V\$SOX9_B1     | SOX9                 | SOX9  | 0.528237   | 4          |
| V\$ZIC3_01     | Zic3                 | ZIC3  | 0.172575   | 4          |
| V\$GR_Q6       | GR                   | NR3C1 | 0.230328   | 4          |
| V\$PARP_Q4     | PARP                 | PARP1 | 0.072931   | 4          |
| V\$GATA1_01    | GATA-1               | GATA1 | 0.003667   | 4          |
| V\$GR_01       | GR                   | NR3C1 | 0.230328   | 4          |
| V\$SOX5_01     | SOX5                 | SOX5  | 0.0687006  | 4          |
| V\$CMAF_01     | c-Maf                | MAF   | 0.256745   | 3          |
| V\$PARP_Q3     | PARP                 | PARP1 | 0.072931   | 3          |
| V\$SOX9_Q4     | SOX9                 | SOX9  | 0.528237   | 3          |
| V\$PBX1_04     | Pbx1                 | PBX1  | 0.149024   | 3          |
| V\$DLX5_01     | dlx5                 | DLX5  | 0.32871    | 3          |
| V\$YY1_Q6_03   | YY1                  | YY1   | 0.514914   | 3          |
| V\$PBX1_Q3     | Pbx1                 | PBX1  | 0.149024   | 3          |
| V\$SOX10_Q6    | SOX10                | SOX10 | 0.0389813  | 3          |
| V\$GATA1_05    | GATA-1               | GATA1 | 0.003667   | 3          |
| V\$GATA1_06    | GATA-1               | GATA1 | 0.003667   | 3          |

|                |            |        |           |   |
|----------------|------------|--------|-----------|---|
| V\$GATA2_02    | GATA-2     | GATA2  | 0.454981  | 3 |
| V\$GATA3_01    | GATA-3     | GATA3  | 0.524188  | 3 |
| V\$YY1_01      | YY1        | YY1    | 0.514914  | 3 |
| V\$FAC1_01     | FAC1       | BPTF   | 0.179193  | 3 |
| V\$GATA1_02    | GATA-1     | GATA1  | 0.003667  | 2 |
| V\$CEBPG_Q6_01 | C/EBPgamma | CEBPG  | 0.459439  | 2 |
| V\$HOXA9_01    | hoxa9      | HOXA9  | 0.0876939 | 2 |
| V\$GATA1_04    | GATA-1     | GATA1  | 0.003667  | 2 |
| V\$SOX2_Q6     | SOX2       | SOX2   | 0.141134  | 2 |
| V\$STAT1_05    | STAT1      | STAT1  | 0.172558  | 2 |
| V\$MEF2A_Q6    | mef2A      | MEF2A  | 0.144564  | 2 |
| V\$GATA2_01    | GATA-2     | GATA2  | 0.454981  | 2 |
| V\$IRF1_Q6     | IRF-1      | IRF1   | 0.0145733 | 2 |
| V\$ZID_01      | ZID        | ZBTB6  | 0.154104  | 1 |
| V\$TCF4_Q5     | TCF-4      | TCF7L2 | 0.479506  | 1 |
| V\$TCF4_01     | TCF-4      | TCF7L2 | 0.479506  | 1 |
| V\$HMGY1_01    | HMGY1      | HMGA1  | 0.368383  | 1 |
| V\$P53_02      | p53        | TP53   | 0.0434883 | 1 |
| V\$AMEF2_Q6    | aMEF-2     | MEF2A  | 0.144564  | 1 |
| V\$GATA2_03    | GATA-2     | GATA2  | 0.454981  | 1 |
| V\$GATA3_02    | GATA-3     | GATA3  | 0.524188  | 1 |
| V\$TCF4_Q5_01  | TCF-4      | TCF7L2 | 0.479506  | 1 |

hsa-mir-320a

| Matrix_id      | transcription factor | Gene   | PCC       | Occurrence |
|----------------|----------------------|--------|-----------|------------|
| V\$PUR1_Q4     | PUR1                 | PURA   | 0.221011  | 206        |
| V\$PEA3_Q6     | PEA3                 | ETV4   | 0.0414501 | 199        |
| V\$ELF1_Q6     | Elf-1                | ELF1   | 0.243735  | 196        |
| V\$MAFB_01     | MAFB                 | MAFB   | 0.260827  | 189        |
| V\$P300_01     | p300                 | EP300  | 0.23833   | 185        |
| V\$SMAD4_Q6_01 | Smad4                | SMAD4  | 0.289483  | 173        |
| V\$GR_Q6       | GR                   | NR3C1  | 0.16184   | 160        |
| V\$YY1_01      | YY1                  | YY1    | 0.384438  | 156        |
| V\$TBP_Q6      | TBP                  | TBP    | 0.0163815 | 155        |
| V\$YY1_Q6_02   | YY1                  | YY1    | 0.384438  | 143        |
| V\$DLX5_01     | dlx5                 | DLX5   | 0.617143  | 138        |
| V\$GATA2_02    | GATA-2               | GATA2  | 0.65942   | 128        |
| V\$HMGY1_01    | HMGY1                | HMGA1  | 0.230045  | 110        |
| V\$GATA3_01    | GATA-3               | GATA3  | 0.828443  | 109        |
| V\$SREBP1_Q6   | SREBP-1              | SREBF1 | 0.188508  | 108        |
| V\$HIF1A_Q6    | HIF-1alpha           | HIF1A  | 0.10311   | 108        |
| V\$GATA3_02    | GATA-3               | GATA3  | 0.828443  | 108        |



|                |            |               |           |     |
|----------------|------------|---------------|-----------|-----|
| V\$ARNT_01     | Arnt       | ARNT          | 0.206678  | 107 |
| V\$YY1_Q6_03   | YY1        | YY1           | 0.384438  | 104 |
| V\$TCF4_01     | TCF-4      | TCF7L2        | 0.632587  | 98  |
| V\$TCF4_Q5     | TCF-4      | TCF7L2        | 0.632587  | 88  |
| V\$FOXJ2_01    | FOXJ2      | FOXJ2         | 0.0110052 | 85  |
| V\$IRF7_Q3     | IRF-7      | IRF7          | 0.0368365 | 83  |
| V\$GATA3_03    | GATA-3     | GATA3         | 0.828443  | 77  |
| V\$CEBPD_Q6    | C/EBPdelta | CEBPD         | 0.432222  | 72  |
| V\$CEBPB_02    | C/EBPbeta  | CEBPB         | 0.502583  | 68  |
| V\$CEBPG_Q6_01 | C/EBPgamma | CEBPG         | 0.470147  | 66  |
| V\$GATA2_03    | GATA-2     | GATA2         | 0.65942   | 62  |
| V\$CEBPB_Q6    | C/EBPbeta  | CEBPB         | 0.502583  | 58  |
| V\$DEC2_Q2     |            | 2-Dec BHLHE41 | 0.0553488 | 46  |
| V\$IRF1_Q6_01  | IRF-1      | IRF1          | 0.222741  | 40  |
| V\$CEBPB_01    | C/EBPbeta  | CEBPB         | 0.502583  | 38  |
| V\$CEBPG_Q6    | C/EBPgamma | CEBPG         | 0.470147  | 38  |
| V\$IRF1_Q6     | IRF-1      | IRF1          | 0.222741  | 34  |
| V\$FOXO4_01    | FOXO4      | FOXO4         | 0.8894    | 29  |
| V\$CDP_04      | CDP        | CUX1          | 0.460219  | 27  |
| V\$GLI3_Q5_01  | GLI3       | GLI3          | 0.207304  | 27  |

hsa-mir-323a

| Matrix_id      | transcription factor | Gene     | PCC        | Occurrence |
|----------------|----------------------|----------|------------|------------|
| V\$PUR1_Q4     | PUR1                 | PURA     | 0.264644   | 30         |
| V\$PARP_Q4     | PARP                 | PARP1    | 0.345641   | 29         |
| V\$ETS2_B      | c-Ets-2              | ETS2     | 0.0237793  | 27         |
| V\$MAFB_01     | MAFB                 | MAFB     | 0.103148   | 26         |
| V\$GABPA_Q4    | GABP-alpha           | GABPA    | 0.165594   | 25         |
| V\$SOX9_Q4     | SOX9                 | SOX9     | 0.0977431  | 24         |
| V\$YY1_01      | YY1                  | YY1      | 0.187616   | 24         |
| V\$AP4_Q6_02   | AP-4                 | TFAP4    | 0.209823   | 23         |
| V\$NR1B2_Q6    | NR1B2                | RARB     | 0.0138754  | 23         |
| V\$HNF4A_Q6_01 | HNF-4alpha           | HNF4A    | 0.1079     | 22         |
| V\$ETS2_Q6     | c-Ets-2              | ETS2     | 0.0237793  | 22         |
| V\$YY1_Q6_02   | YY1                  | YY1      | 0.187616   | 22         |
| V\$YY1_Q6      | YY1                  | YY1      | 0.187616   | 21         |
| V\$ING4_01     | ING4                 | ING4     | 0.402796   | 20         |
| V\$AHR_Q5      | AhR                  | AHR      | 0.0232897  | 18         |
| V\$PBX1_04     | Pbx1                 | PBX1     | 0.326244   | 18         |
| V\$BEN_01      | BEN                  | GTF2IRD1 | 0.00240317 | 18         |
| V\$AP2ALPHA_Q6 | AP-2alpha            | TFAP2A   | 0.0408258  | 16         |
| V\$GATA3_01    | GATA-3               | GATA3    | 0.0160458  | 15         |

|                |           |         |            |    |
|----------------|-----------|---------|------------|----|
| V\$CREM_Q6     | CREM      | CREM    | 0.42257    | 13 |
| V\$GABPBETA_Q3 | GABP-beta | GABPB1  | 0.022182   | 13 |
| V\$SOX10_Q6    | SOX10     | SOX10   | 0.459172   | 13 |
| V\$PIT1_Q6     | Pit-1     | POU1F1  | 0.220041   | 12 |
| V\$CEBPB_Q2    | C/EBPbeta | CEBPB   | 0.0347624  | 12 |
| V\$OC2_Q3      | OC-2      | ONECUT2 | 0.0735801  | 10 |
| V\$ELK1_Q1     | Elk-1     | ELK1    | 0.260017   | 9  |
| V\$ATF4_Q6     | ATF-4     | ATF4    | 0.0834233  | 9  |
| V\$ATF2_Q5     | ATF-2     | ATF2    | 0.00068644 | 8  |
| V\$AP4_Q1      | AP-4      | TFAP4   | 0.209823   | 7  |
| V\$YY1_Q2      | YY1       | YY1     | 0.187616   | 7  |
| V\$MAFK_Q3     | MafK      | MAFK    | 0.0743458  | 6  |
| V\$SOX2_Q6     | SOX2      | SOX2    | 0.210164   | 6  |
| V\$POU3F2_Q2   | POU3F2    | POU3F2  | 0.0426044  | 2  |

hsa-mir-324

| Matrix_id      | transcription factor | Gene   | PCC       | Occurrence |
|----------------|----------------------|--------|-----------|------------|
| V\$PUR1_Q4     | PUR1                 | PURA   | 0.493825  | 111        |
| V\$ELF1_Q6     | Elf-1                | ELF1   | 0.0867232 | 103        |
| V\$MAFB_Q1     | MAFB                 | MAFB   | 0.246264  | 103        |
| V\$GKLF_Q4     | GKLF                 | KLF4   | 0.0953329 | 103        |
| V\$P300_Q1     | p300                 | EP300  | 0.0366185 | 102        |
| V\$PARP_Q4     | PARP                 | PARP1  | 0.369295  | 102        |
| V\$GABPA_Q4    | GABP-alpha           | GABPA  | 0.123118  | 91         |
| V\$TBP_Q6      | TBP                  | TBP    | 0.022735  | 90         |
| V\$ETS2_Q6     | c-Ets-2              | ETS2   | 0.103604  | 87         |
| V\$YY1_Q1      | YY1                  | YY1    | 0.370041  | 87         |
| V\$SOX9_Q4     | SOX9                 | SOX9   | 0.280073  | 83         |
| V\$MEF2C_Q4    | MEF-2C               | MEF2C  | 0.573017  | 83         |
| V\$AHR_Q5      | AhR                  | AHR    | 0.168963  | 83         |
| V\$ETS2_B      | c-Ets-2              | ETS2   | 0.103604  | 77         |
| V\$SOX9_B1     | SOX9                 | SOX9   | 0.280073  | 76         |
| V\$HNF4A_Q6_Q1 | HNF-4alpha           | HNF4A  | 0.0192666 | 70         |
| V\$SRY_Q2      | SRY                  | SRY    | 0.0278176 | 69         |
| V\$ING4_Q1     | ING4                 | ING4   | 0.500808  | 67         |
| V\$ZBP89_Q4    | ZBP89                | ZNF148 | 0.0350651 | 65         |
| V\$PARP_Q3     | PARP                 | PARP1  | 0.369295  | 64         |
| V\$FOXO3A_Q1   | FOXO3A               | FOXO3  | 0.0342312 | 63         |
| V\$PBX1_Q3     | Pbx1                 | PBX1   | 0.352887  | 60         |
| V\$PBX1_Q4     | Pbx1                 | PBX1   | 0.352887  | 58         |
| V\$IRF8_Q6     | IRF-8                | IRF8   | 0.0877557 | 54         |
| V\$FOXJ2_Q1    | FOXJ2                | FOXJ2  | 0.0539899 | 50         |

|                     |                      |        |            |    |
|---------------------|----------------------|--------|------------|----|
| V\$CREM_Q6          | CREM                 | CREM   | 0.278181   | 46 |
| V\$HIF1A_Q6         | HIF-1alpha           | HIF1A  | 0.316272   | 46 |
| V\$GABPBETA_Q3      | GABP-beta            | GABPB1 | 0.0938843  | 44 |
| V\$TCF4_Q1          | TCF-4                | TCF7L2 | 0.089921   | 43 |
| V\$CP2_Q1           | CP2                  | TFCP2  | 0.478285   | 43 |
| V\$EGR1_Q2          | EGR-1                | EGR1   | 0.19054    | 43 |
| V\$SP2_Q1           | SP2                  | SP2    | 0.179139   | 41 |
| V\$SOX10_Q6         | SOX10                | SOX10  | 0.537846   | 39 |
| V\$FOXO4_Q2         | FOXO4                | FOXO4  | 0.226839   | 38 |
| V\$CEBPB_Q6         | C/EBPbeta            | CEBPB  | 0.0198975  | 37 |
| V\$HBP1_Q2          | hbp1                 | HBP1   | 0.014323   | 35 |
| V\$ELK1_Q1          | Elk-1                | ELK1   | 0.1987     | 34 |
| V\$ATF1_Q6_Q1       | ATF-1                | ATF1   | 0.0260456  | 34 |
| V\$CACCCBINDINGFACT | CACCC-binding factor | ZNF148 | 0.0350651  | 30 |
| V\$NURR1_Q3         | NURR1                | NR4A2  | 0.417963   | 29 |
| V\$ZIC1_Q1          | Zic1                 | ZIC1   | 0.72097    | 28 |
| V\$CIZ_Q1           | CIZ                  | ZNF384 | 0.11844    | 20 |
| V\$EGR2_Q1          | Egr-2                | EGR2   | 0.124168   | 18 |
| V\$RORBETA_Q2       | RORBETA              | RORB   | 0.142094   | 18 |
| V\$PAX3_Q1          | Pax-3                | PAX3   | 0.00412714 | 3  |

hsa-mir-328

| Matrix_id    | transcription factor | Gene     | PCC        | Occurrence |
|--------------|----------------------|----------|------------|------------|
| V\$PUR1_Q4   | PUR1                 | PURA     | 0.35413    | 287        |
| V\$PARP_Q4   | PARP                 | PARP1    | 0.376363   | 266        |
| V\$ZIC3_Q1   | Zic3                 | ZIC3     | 0.0770942  | 262        |
| V\$MAFB_Q1   | MAFB                 | MAFB     | 0.015989   | 261        |
| V\$SOX9_Q4   | SOX9                 | SOX9     | 0.264574   | 230        |
| V\$GABPA_Q4  | GABP-alpha           | GABPA    | 0.0225432  | 230        |
| V\$TBP_Q6    | TBP                  | TBP      | 0.0204302  | 230        |
| V\$Elf5_Q3   | ELF5                 | ELF5     | 0.00770155 | 218        |
| V\$AP4_Q6_Q2 | AP-4                 | TFAP4    | 0.389375   | 210        |
| V\$YY1_Q1    | YY1                  | YY1      | 0.0958951  | 209        |
| V\$BEN_Q1    | BEN                  | GTF2IRD1 | 0.0363937  | 206        |
| V\$MEF2C_Q4  | MEF-2C               | MEF2C    | 0.720637   | 202        |
| V\$ETS2_B    | c-Ets-2              | ETS2     | 0.149895   | 196        |
| V\$SOX9_B1   | SOX9                 | SOX9     | 0.264574   | 194        |
| V\$YY1_Q6    | YY1                  | YY1      | 0.0958951  | 194        |
| V\$DLX5_Q1   | dlx5                 | DLX5     | 0.0353274  | 192        |
| V\$YY1_Q6_Q2 | YY1                  | YY1      | 0.0958951  | 189        |
| V\$GATA6_Q1  | GATA-6               | GATA6    | 0.204651   | 178        |
| V\$PARP_Q3   | PARP                 | PARP1    | 0.376363   | 174        |

|               |        |          |            |     |
|---------------|--------|----------|------------|-----|
| V\$ING4_01    | ING4   | ING4     | 0.471832   | 169 |
| V\$FOXO3A_Q1  | FOXO3A | FOXO3    | 0.0410734  | 164 |
| V\$PITX3_Q2   | PITX3  | PITX3    | 0.22856    | 158 |
| V\$PBX1_04    | Pbx1   | PBX1     | 0.372444   | 158 |
| V\$PBX1_Q3    | Pbx1   | PBX1     | 0.372444   | 150 |
| V\$YY1_Q6_03  | YY1    | YY1      | 0.0958951  | 142 |
| V\$FOXJ2_01   | FOXJ2  | FOXJ2    | 0.0879686  | 133 |
| V\$EGR1_02    | EGR-1  | EGR1     | 0.211019   | 129 |
| V\$CREM_Q6    | CREM   | CREM     | 0.2478     | 126 |
| V\$CP2_01     | CP2    | TFCP2    | 0.257379   | 103 |
| V\$ZIC1_01    | Zic1   | ZIC1     | 0.829281   | 102 |
| V\$ELF5_01    | ELF5   | ELF5     | 0.00770155 | 102 |
| V\$OC2_Q3     | OC-2   | ONECUT2  | 0.0476887  | 99  |
| V\$ATF1_Q6_01 | ATF-1  | ATF1     | 0.00375509 | 97  |
| V\$FAC1_01    | FAC1   | BPTF     | 0.146555   | 94  |
| V\$MEF2A_Q6   | mef2A  | MEF2A    | 0.595996   | 93  |
| V\$PIT1_Q6    | Pit-1  | POU1F1   | 0.110538   | 91  |
| V\$NURR1_Q3   | NURR1  | NR4A2    | 0.48402    | 86  |
| V\$YY1_02     | YY1    | YY1      | 0.0958951  | 85  |
| V\$ATF4_Q6    | ATF-4  | ATF4     | 0.0787672  | 70  |
| V\$BEN_02     | BEN    | GTF2IRD1 | 0.0363937  | 67  |
| V\$CIZ_01     | CIZ    | ZNF384   | 0.0534678  | 65  |
| V\$ATF2_Q5    | ATF-2  | ATF2     | 0.060026   | 51  |
| V\$POU6F1_03  | POU6F1 | POU6F1   | 0.299797   | 33  |
| V\$SATB1_Q3   | SATB1  | SATB1    | 0.164416   | 30  |
| V\$POU6F1_02  | POU6F1 | POU6F1   | 0.299797   | 27  |

hsa-mir-330

| Matrix_id    | transcription factor | Gene  | PCC        | Occurrence |
|--------------|----------------------|-------|------------|------------|
| V\$PUR1_Q4   | PUR1                 | PURA  | 0.419204   | 491        |
| V\$MAFB_01   | MAFB                 | MAFB  | 0.17072    | 455        |
| V\$ZIC3_01   | Zic3                 | ZIC3  | 0.198149   | 445        |
| V\$ETS2_Q6   | c-Ets-2              | ETS2  | 0.195107   | 409        |
| V\$SOX9_Q4   | SOX9                 | SOX9  | 0.241243   | 395        |
| V\$GABPA_Q4  | GABP-alpha           | GABPA | 0.140881   | 395        |
| V\$TBP_Q6    | TBP                  | TBP   | 0.024102   | 386        |
| V\$NR1B2_Q6  | NR1B2                | RARB  | 0.00106793 | 385        |
| V\$AP4_Q6_02 | AP-4                 | TFAP4 | 0.416124   | 367        |
| V\$MAZ_Q6    | MAZ                  | MAZ   | 0.224981   | 361        |
| V\$YY1_01    | YY1                  | YY1   | 0.0987488  | 359        |
| V\$MEF2C_Q4  | MEF-2C               | MEF2C | 0.812276   | 351        |
| V\$YY1_Q6_02 | YY1                  | YY1   | 0.0987488  | 332        |

|                     |                      |               |            |     |
|---------------------|----------------------|---------------|------------|-----|
| V\$ETS2_B           | c-Ets-2              | ETS2          | 0.195107   | 332 |
| V\$YY1_Q6           | YY1                  | YY1           | 0.0987488  | 332 |
| V\$DLX5_01          | dlx5                 | DLX5          | 0.00737451 | 327 |
| V\$TFIIQ_Q6         | TFII-Q               | GTF2I         | 0.268589   | 289 |
| V\$ING4_01          | ING4                 | ING4          | 0.693231   | 285 |
| V\$ELK1_02          | Elk-1                | ELK1          | 0.110979   | 273 |
| V\$PITX3_Q2         | PITX3                | PITX3         | 0.0416587  | 260 |
| V\$AP4_Q5           | AP-4                 | TFAP4         | 0.416124   | 254 |
| V\$PBX1_Q3          | Pbx1                 | PBX1          | 0.230773   | 254 |
| V\$YY1_Q6_03        | YY1                  | YY1           | 0.0987488  | 250 |
| V\$ELK1_06          | ELK-1                | ELK1          | 0.110979   | 238 |
| V\$AP4_Q6           | AP-4                 | TFAP4         | 0.416124   | 232 |
| V\$KLF15_Q2         | KLF15                | KLF15         | 0.0413249  | 222 |
| V\$IRF8_Q6          | IRF-8                | IRF8          | 0.092706   | 216 |
| V\$ERF_Q2           | ERF                  | ERF           | 0.239771   | 213 |
| V\$NEUROD_Q2        | NeuroD               | NEUROD1       | 0.100747   | 174 |
| V\$SP4_Q5           | SP4                  | SP4           | 0.0420767  | 164 |
| V\$AP4_Q6_01        | AP-4                 | TFAP4         | 0.416124   | 162 |
| V\$NKX2B_Q3         | NKX2B                | NKX2-2        | 0.881091   | 157 |
| V\$NKX22_Q2         | NKX2B                | NKX2-2        | 0.881091   | 151 |
| V\$MEF2A_Q6         | mef2A                | MEF2A         | 0.67377    | 149 |
| V\$CACCCBINDINGFACT | CACCC-binding factor | ZNF148        | 0.11751    | 119 |
| V\$DEC2_Q2          |                      | 2-Dec BHLHE41 | 0.672485   | 96  |
| V\$EGR2_Q1          | Egr-2                | EGR2          | 0.221246   | 81  |
| V\$E2F1_Q4          | E2F-1                | E2F1          | 0.138356   | 80  |
| V\$RORBETA_Q2       | RORBETA              | RORB          | 0.328927   | 77  |
| V\$CDP_Q2           | CDP                  | CUX1          | 0.0613238  | 15  |

hsa-mir-331

| Matrix_id      | transcription factor | Gene  | PCC      | Occurrence |
|----------------|----------------------|-------|----------|------------|
| V\$GKLF_Q4     | GKLF                 | KLF4  | 0.111368 | 20         |
| V\$PARP_Q4     | PARP                 | PARP1 | 0.628062 | 19         |
| V\$PUR1_Q4     | PUR1                 | PURA  | 0.465841 | 19         |
| V\$ZIC3_Q1     | Zic3                 | ZIC3  | 0.198548 | 18         |
| V\$SMAD4_Q6_01 | Smad4                | SMAD4 | 0.259763 | 18         |
| V\$AP2REP_Q1   | AP-2rep              | KLF12 | 0.250866 | 18         |
| V\$PEA3_Q6     | PEA3                 | ETV4  | 0.239717 | 18         |
| V\$P300_Q1     | p300                 | EP300 | 0.396224 | 18         |
| V\$MAFB_Q1     | MAFB                 | MAFB  | 0.154707 | 17         |
| V\$GATA1_Q1    | GATA-1               | GATA1 | 0.135945 | 16         |
| V\$AHR_Q5      | AhR                  | AHR   | 0.332835 | 16         |
| V\$AP4_Q6_Q2   | AP-4                 | TFAP4 | 0.40995  | 16         |

|                |            |        |           |    |
|----------------|------------|--------|-----------|----|
| V\$YY1_Q6_02   | YY1        | YY1    | 0.393942  | 15 |
| V\$GABPA_Q4    | GABP-alpha | GABPA  | 0.387096  | 15 |
| V\$CETS1_Q6    | C-ets-1    | ETS1   | 0.1203    | 15 |
| V\$NR1B2_Q6    | NR1B2      | RARB   | 0.312845  | 15 |
| V\$ETS1_B      | c-Ets-1    | ETS1   | 0.1203    | 15 |
| V\$YY1_Q6      | YY1        | YY1    | 0.393942  | 14 |
| V\$AML1_Q6     | AML1       | RUNX1  | 0.249442  | 14 |
| V\$TBP_Q6      | TBP        | TBP    | 0.242066  | 14 |
| V\$DLX5_01     | dlx5       | DLX5   | 0.471571  | 14 |
| V\$ETS2_B      | c-Ets-2    | ETS2   | 0.329858  | 14 |
| V\$CDX2_Q5_02  | CDX-2      | CDX2   | 0.19939   | 14 |
| V\$ETS2_Q6     | c-Ets-2    | ETS2   | 0.329858  | 13 |
| V\$TEL1_02     | TEL1       | ETV6   | 0.243051  | 13 |
| V\$IPF1_01     | IPF1       | PDX1   | 0.223324  | 13 |
| V\$ETV3_02     | ETV3       | ETV3   | 0.131544  | 13 |
| V\$CDX2_Q5_01  | Cdx-2      | CDX2   | 0.19939   | 12 |
| V\$ERBETA_Q5   | ER-beta    | ESR2   | 0.171018  | 12 |
| V\$HNF4A_Q6_01 | HNF-4alpha | HNF4A  | 0.123791  | 12 |
| V\$MEF2C_Q4    | MEF-2C     | MEF2C  | 0.646327  | 12 |
| V\$ELK1_02     | Elk-1      | ELK1   | 0.532463  | 12 |
| V\$ER71_02     | ER71       | ETV2   | 0.0725933 | 12 |
| V\$ELK1_06     | ELK-1      | ELK1   | 0.532463  | 12 |
| V\$IPF1_Q6     | IPF1       | PDX1   | 0.223324  | 11 |
| V\$ERF_02      | ERF        | ERF    | 0.179298  | 11 |
| V\$CREM_Q6     | CREM       | CREM   | 0.482647  | 11 |
| V\$IPF1_Q4_01  | IPF1       | PDX1   | 0.223324  | 11 |
| V\$SOX9_B1     | SOX9       | SOX9   | 0.119318  | 11 |
| V\$CP2_01      | CP2        | TFCP2  | 0.654957  | 11 |
| V\$SOX5_01     | SOX5       | SOX5   | 0.0301567 | 11 |
| V\$PITX3_Q2    | PITX3      | PITX3  | 0.478068  | 11 |
| V\$HNF3A_01    | HNF3A      | FOXA1  | 0.032076  | 10 |
| V\$NFAT2_Q5    | NF-AT2     | NFATC1 | 0.193243  | 10 |
| V\$SREBP1_Q6   | SREBP-1    | SREBF1 | 0.445009  | 10 |
| V\$SRY_02      | SRY        | SRY    | 0.220141  | 10 |
| V\$RFX1_01     | RFX1       | RFX1   | 0.229449  | 10 |
| V\$GATA3_01    | GATA-3     | GATA3  | 0.331739  | 10 |
| V\$ATF1_Q6_01  | ATF-1      | ATF1   | 0.0751312 | 10 |
| V\$IRF4_Q6     | IRF-4      | IRF4   | 0.232655  | 10 |
| V\$YY1_Q6_03   | YY1        | YY1    | 0.393942  | 10 |
| V\$CDX2_01     | Cdx-2      | CDX2   | 0.19939   | 10 |
| V\$LHX3b_01    | LHX3b      | LHX3   | 0.373223  | 9  |
| V\$NKX32_01    | Nkx3-2     | NKX3-2 | 0.14343   | 9  |
| V\$HMGY1_01    | HMGY1      | HMGA1  | 0.102541  | 9  |
| V\$HBP1_Q2     | hbp1       | HBP1   | 0.331736  | 8  |
| V\$IPF1_02     | IPF1       | PDX1   | 0.223324  | 8  |
| V\$NANOG_02    | Nanog      | NANOG  | 0.157092  | 8  |

|              |           |         |           |   |
|--------------|-----------|---------|-----------|---|
| V\$FOXO3A_Q1 | FOXO3A    | FOXO3   | 0.209402  | 8 |
| V\$PBX1_Q4   | Pbx1      | PBX1    | 0.0610794 | 8 |
| V\$IPF1_Q4   | IPF1      | PDX1    | 0.223324  | 8 |
| V\$FOXJ2_Q1  | FOXJ2     | FOXJ2   | 0.38801   | 8 |
| V\$CART1_Q2  | CART1     | ALX1    | 0.303745  | 7 |
| V\$HOX13_Q2  | HOXA5     | HOXA5   | 0.32138   | 7 |
| V\$OC2_Q3    | OC-2      | ONECUT2 | 0.34472   | 7 |
| V\$GATA6_Q1  | GATA-6    | GATA6   | 0.207091  | 7 |
| V\$GATA1_Q6  | GATA-1    | GATA1   | 0.135945  | 7 |
| V\$GATA3_Q2  | GATA-3    | GATA3   | 0.331739  | 7 |
| V\$GATA2_Q2  | GATA-2    | GATA2   | 0.349183  | 7 |
| V\$GATA1_Q5  | GATA-1    | GATA1   | 0.135945  | 7 |
| V\$FAC1_Q1   | FAC1      | BPTF    | 0.0649903 | 6 |
| V\$HNF3B_Q6  | HNF-3beta | FOXA2   | 0.0555891 | 6 |
| V\$DBP_Q6_Q1 | DBP       | DBP     | 0.37896   | 6 |
| V\$STAT3_Q3  | STAT3     | STAT3   | 0.1754    | 6 |
| V\$FOXP3_Q1  | FOXP3     | FOXP3   | 0.246946  | 6 |
| V\$IPF1_Q6   | ipf1      | PDX1    | 0.223324  | 6 |
| V\$IPF1_Q3   | IPF1      | PDX1    | 0.223324  | 6 |
| V\$YY1_Q3    | YY1       | YY1     | 0.393942  | 5 |
| V\$HOXA9_Q1  | hoxa9     | HOXA9   | 0.03981   | 5 |
| V\$LHX3_Q1   | Lhx3      | LHX3    | 0.373223  | 5 |
| V\$CEBPE_Q6  | CEBPE     | CEBPE   | 0.152995  | 5 |
| V\$YY1_Q2    | YY1       | YY1     | 0.393942  | 5 |
| V\$CEBPB_Q2  | C/EBPbeta | CEBPB   | 0.325866  | 4 |
| V\$MSX1_Q1   | Msx-1     | MSX1    | 0.223067  | 4 |
| V\$GATA2_Q3  | GATA-2    | GATA2   | 0.349183  | 4 |
| V\$HOXD9_Q2  | Hoxd9     | HOXD9   | 0.0679966 | 4 |
| V\$EAR2_Q2   | EAR2      | NR2F6   | 0.36846   | 4 |
| V\$PIT1_Q6   | Pit-1     | POU1F1  | 0.274542  | 4 |
| V\$STAT4_Q5  | STAT4     | STAT4   | 0.301812  | 3 |
| V\$POU6F1_Q2 | POU6F1    | POU6F1  | 0.441364  | 3 |
| V\$STAT1_Q6  | STAT1     | STAT1   | 0.0630329 | 3 |
| V\$CDX2_Q5   | Cdx-2     | CDX2    | 0.19939   | 3 |
| V\$STAT1_Q5  | STAT1     | STAT1   | 0.0630329 | 2 |
| V\$POU3F2_Q2 | POU3F2    | POU3F2  | 0.373993  | 2 |
| V\$POU6F1_Q3 | POU6F1    | POU6F1  | 0.441364  | 2 |
| V\$LHX3A_Q1  | Lhx3a     | LHX3    | 0.373223  | 1 |

hsa-mir-335

| Matrix_id  | transcription factor | Gene | PCC      | Occurrence |
|------------|----------------------|------|----------|------------|
| V\$PUR1_Q4 | PUR1                 | PURA | 0.150427 | 244        |

|                |            |        |           |     |
|----------------|------------|--------|-----------|-----|
| V\$PEA3_Q6     | PEA3       | ETV4   | 0.0443719 | 237 |
| V\$PARP_Q4     | PARP       | PARP1  | 0.0760486 | 236 |
| V\$ELF1_Q6     | Elf-1      | ELF1   | 0.172088  | 233 |
| V\$GKLF_Q4     | GKLF       | KLF4   | 0.550471  | 229 |
| V\$MAFB_01     | MAFB       | MAFB   | 0.304288  | 222 |
| V\$SMAD4_Q6_01 | Smad4      | SMAD4  | 0.250583  | 208 |
| V\$GABPA_Q4    | GABP-alpha | GABPA  | 0.353425  | 197 |
| V\$TBP_Q6      | TBP        | TBP    | 0.11378   | 187 |
| V\$GR_Q6       | GR         | NR3C1  | 0.11708   | 186 |
| V\$YY1_01      | YY1        | YY1    | 0.375681  | 182 |
| V\$YY1_Q6      | YY1        | YY1    | 0.375681  | 167 |
| V\$YY1_Q6_02   | YY1        | YY1    | 0.375681  | 166 |
| V\$DLX5_01     | dlx5       | DLX5   | 0.681671  | 166 |
| V\$GATA2_02    | GATA-2     | GATA2  | 0.640878  | 158 |
| V\$ING4_01     | ING4       | ING4   | 0.0994541 | 147 |
| V\$PARP_Q3     | PARP       | PARP1  | 0.0760486 | 147 |
| V\$FKLF_Q5     | FKLF       | KLF11  | 0.23254   | 137 |
| V\$HMG1Y_01    | HMG1Y      | HMGA1  | 0.319737  | 137 |
| V\$GATA3_01    | GATA-3     | GATA3  | 0.893577  | 131 |
| V\$SREBP1_Q6   | SREBP-1    | SREBF1 | 0.233227  | 129 |
| V\$YY1_Q6_03   | YY1        | YY1    | 0.375681  | 124 |
| V\$GATA2_01    | GATA-2     | GATA2  | 0.640878  | 119 |
| V\$CEBPA_Q6    | C/EBPalpha | CEBPA  | 0.0393831 | 114 |
| V\$GR_01       | GR         | NR3C1  | 0.11708   | 113 |
| V\$TCF4_01     | TCF-4      | TCF7L2 | 0.463803  | 110 |
| V\$IRF7_Q3     | IRF-7      | IRF7   | 0.0608511 | 103 |
| V\$ESE1_Q3     | ESE-1      | ELF3   | 0.0781143 | 96  |
| V\$CREM_Q6     | CREM       | CREM   | 0.205777  | 91  |
| V\$GABPBETA_Q3 | GABP-beta  | GABPB1 | 0.196211  | 89  |
| V\$CEBPD_Q6    | C/EBPdelta | CEBPD  | 0.414997  | 89  |
| V\$GATA3_03    | GATA-3     | GATA3  | 0.893577  | 88  |
| V\$CEBPB_02    | C/EBPbeta  | CEBPB  | 0.579904  | 86  |
| V\$CEBPG_Q6_01 | C/EBPgamma | CEBPG  | 0.530121  | 79  |
| V\$CEBPB_Q6    | C/EBPbeta  | CEBPB  | 0.579904  | 71  |
| V\$YY1_02      | YY1        | YY1    | 0.375681  | 70  |
| V\$CEBPA_01    | C/EBPalpha | CEBPA  | 0.0393831 | 67  |
| V\$ATF3_Q6_01  | ATF-3      | ATF3   | 0.59032   | 64  |
| V\$EAR2_Q2     | EAR2       | NR2F6  | 0.396424  | 60  |
| V\$CEBPG_Q6    | C/EBPgamma | CEBPG  | 0.530121  | 45  |
| V\$CEBPB_01    | C/EBPbeta  | CEBPB  | 0.579904  | 44  |
| V\$IRF1_Q6     | IRF-1      | IRF1   | 0.253615  | 43  |
| V\$STAT1_Q6    | STAT1      | STAT1  | 0.0497363 | 37  |
| V\$E4BP4_01    | E4BP4      | NFIL3  | 0.166757  | 11  |

---



## hsa-mir-338

| Matrix_id    | transcription factor | Gene   | PCC        | Occurrence |
|--------------|----------------------|--------|------------|------------|
| V\$PUR1_Q4   | PUR1                 | PURA   | 0.388227   | 425        |
| V\$MAFB_01   | MAFB                 | MAFB   | 0.224377   | 392        |
| V\$PARP_Q4   | PARP                 | PARP1  | 0.342928   | 387        |
| V\$ZIC3_01   | Zic3                 | ZIC3   | 0.170904   | 385        |
| V\$ETS2_Q6   | c-Ets-2              | ETS2   | 0.245025   | 349        |
| V\$SOX9_Q4   | SOX9                 | SOX9   | 0.244942   | 338        |
| V\$GABPA_Q4  | GABP-alpha           | GABPA  | 0.0724754  | 338        |
| V\$AP4_Q6_02 | AP-4                 | TFAP4  | 0.402693   | 311        |
| V\$YY1_01    | YY1                  | YY1    | 0.0511802  | 308        |
| V\$MEF2C_Q4  | MEF-2C               | MEF2C  | 0.745532   | 297        |
| V\$YY1_Q6    | YY1                  | YY1    | 0.0511802  | 288        |
| V\$ETS2_B    | c-Ets-2              | ETS2   | 0.245025   | 286        |
| V\$YY1_Q6_02 | YY1                  | YY1    | 0.0511802  | 284        |
| V\$SOX9_B1   | SOX9                 | SOX9   | 0.244942   | 278        |
| V\$ZBP89_Q4  | ZBP89                | ZNF148 | 0.0634848  | 255        |
| V\$SRY_02    | SRY                  | SRY    | 0.112372   | 253        |
| V\$PARP_Q3   | PARP                 | PARP1  | 0.342928   | 251        |
| V\$PBX1_04   | Pbx1                 | PBX1   | 0.212183   | 229        |
| V\$PBX1_Q3   | Pbx1                 | PBX1   | 0.212183   | 221        |
| V\$YY1_Q6_03 | YY1                  | YY1    | 0.0511802  | 220        |
| V\$AP4_Q5    | AP-4                 | TFAP4  | 0.402693   | 216        |
| V\$AP4_Q6    | AP-4                 | TFAP4  | 0.402693   | 197        |
| V\$SOX10_Q6  | SOX10                | SOX10  | 0.676265   | 175        |
| V\$CP2_01    | CP2                  | TFCP2  | 0.193589   | 158        |
| V\$ZIC1_01   | Zic1                 | ZIC1   | 0.915383   | 145        |
| V\$AP4_Q6_01 | AP-4                 | TFAP4  | 0.402693   | 139        |
| V\$YY1_02    | YY1                  | YY1    | 0.0511802  | 124        |
| V\$AP4_01    | AP-4                 | TFAP4  | 0.402693   | 89         |
| V\$EAR2_Q2   | EAR2                 | NR2F6  | 0.00168923 | 86         |
| V\$YY1_03    | YY1                  | YY1    | 0.0511802  | 77         |

## hsa-mir-340

| Matrix_id  | transcription factor | Gene  | PCC      | Occurrence |
|------------|----------------------|-------|----------|------------|
| V\$PUR1_Q4 | PUR1                 | PURA  | 0.451883 | 544        |
| V\$MAFB_01 | MAFB                 | MAFB  | 0.226668 | 498        |
| V\$ZIC3_01 | Zic3                 | ZIC3  | 0.239744 | 494        |
| V\$PARP_Q4 | PARP                 | PARP1 | 0.491561 | 493        |
| V\$P300_01 | p300                 | EP300 | 0.047696 | 487        |

|                |            |          |            |     |
|----------------|------------|----------|------------|-----|
| V\$TBX5_02     | TBX5       | TBX5     | 0.00929668 | 452 |
| V\$CETS1_Q6    | C-ets-1    | ETS1     | 0.0932357  | 450 |
| V\$GATA1_01    | GATA-1     | GATA1    | 0.0720293  | 449 |
| V\$ETS2_Q6     | c-Ets-2    | ETS2     | 0.249327   | 446 |
| V\$ETS1_B      | c-Ets-1    | ETS1     | 0.0932357  | 442 |
| V\$NR1B2_Q6    | NR1B2      | RARB     | 0.144275   | 434 |
| V\$SOX9_Q4     | SOX9       | SOX9     | 0.260775   | 430 |
| V\$GABPA_Q4    | GABP-alpha | GABPA    | 0.219896   | 429 |
| V\$SMAD3_Q6_01 | Smad3      | SMAD3    | 0.0235403  | 419 |
| V\$MAZ_Q6      | MAZ        | MAZ      | 0.367959   | 401 |
| V\$YY1_01      | YY1        | YY1      | 0.129669   | 399 |
| V\$BEN_01      | BEN        | GTF2IRD1 | 0.0651936  | 393 |
| V\$GR_Q6       | GR         | NR3C1    | 0.085777   | 390 |
| V\$LRF_Q2      | LRF        | ZBTB7A   | 0.0470768  | 383 |
| V\$HNF4A_Q6_01 | HNF-4alpha | HNF4A    | 0.129145   | 376 |
| V\$AML1_Q6     | AML1       | RUNX1    | 0.00485028 | 376 |
| V\$YY1_Q6_02   | YY1        | YY1      | 0.129669   | 369 |
| V\$YY1_Q6      | YY1        | YY1      | 0.129669   | 368 |
| V\$ETS2_B      | c-Ets-2    | ETS2     | 0.249327   | 366 |
| V\$IPF1_Q6     | IPF1       | PDX1     | 0.00602966 | 357 |
| V\$TBX5_01     | TBX5       | TBX5     | 0.00929668 | 356 |
| V\$GATA1_06    | GATA-1     | GATA1    | 0.0720293  | 342 |
| V\$GATA1_05    | GATA-1     | GATA1    | 0.0720293  | 342 |
| V\$IPF1_Q4_01  | IPF1       | PDX1     | 0.00602966 | 341 |
| V\$ING4_01     | ING4       | ING4     | 0.745053   | 324 |
| V\$TEL1_02     | TEL1       | ETV6     | 0.00912305 | 306 |
| V\$ELK1_02     | Elk-1      | ELK1     | 0.252167   | 306 |
| V\$PBX1_04     | Pbx1       | PBX1     | 0.159625   | 291 |
| V\$PBX1_Q3     | Pbx1       | PBX1     | 0.159625   | 281 |
| V\$YY1_Q6_03   | YY1        | YY1      | 0.129669   | 272 |
| V\$ETV7_01     | ETV7       | ETV7     | 0.0313973  | 262 |
| V\$CNOT3_01    | CNOT3      | CNOT3    | 0.0348341  | 249 |
| V\$ERR1_Q3     | ERR1       | ESRRA    | 0.0638228  | 235 |
| V\$CREM_Q6     | CREM       | CREM     | 0.114089   | 231 |
| V\$GR_01       | GR         | NR3C1    | 0.085777   | 224 |
| V\$ZIC1_01     | Zic1       | ZIC1     | 0.938954   | 199 |
| V\$AML1_01     | AML1a      | RUNX1    | 0.00485028 | 197 |
| V\$OC2_Q3      | OC-2       | ONECUT2  | 0.0890272  | 184 |
| V\$AML1_Q4     | AML1       | RUNX1    | 0.00485028 | 174 |
| V\$FAC1_01     | FAC1       | BPTF     | 0.0645098  | 163 |
| V\$PIT1_Q6     | Pit-1      | POU1F1   | 0.119992   | 162 |
| V\$IPF1_02     | IPF1       | PDX1     | 0.00602966 | 162 |
| V\$DBP_Q6_01   | DBP        | DBP      | 0.325419   | 158 |
| V\$BEN_02      | BEN        | GTF2IRD1 | 0.0651936  | 130 |
| V\$GRE_C       | GR         | NR3C1    | 0.085777   | 32  |

---

hsa-mir-342

| Matrix_id     | transcription factor | Gene   | PCC       | Occurrence |
|---------------|----------------------|--------|-----------|------------|
| V\$IK_Q5      | Ikaros               | IKZF1  | 0.0278374 | 5          |
| V\$ELF1_Q6    | Elf-1                | ELF1   | 0.0285681 | 5          |
| V\$MYB_Q6     | c-Myb                | MYB    | 0.172515  | 4          |
| V\$GFI1_Q6_01 | Gfi1                 | GFI1   | 0.191649  | 4          |
| V\$GFI1_Q6    | Gfi1                 | GFI1   | 0.191649  | 4          |
| V\$SOX10_Q6   | SOX10                | SOX10  | 0.32917   | 4          |
| V\$CMYB_Q5    | c-Myb                | MYB    | 0.172515  | 4          |
| V\$MAFB_01    | MAFB                 | MAFB   | 0.0534717 | 4          |
| V\$AML2_Q3    | AML2                 | RUNX3  | 0.0658738 | 4          |
| V\$AML2_01    | AML2                 | RUNX3  | 0.0658738 | 3          |
| V\$NFAT4_Q3   | NF-AT4               | NFATC3 | 0.0214746 | 3          |
| V\$ING4_01    | ING4                 | ING4   | 0.561119  | 3          |
| V\$AML2_Q3_01 | AML2                 | RUNX3  | 0.0658738 | 3          |
| V\$MAX_Q6     | MAX                  | MAX    | 0.278294  | 2          |
| V\$MAX_01     | Max                  | MAX    | 0.278294  | 2          |
| V\$USF2_Q6    | USF2                 | USF2   | 0.0150535 | 2          |
| V\$LEF1_Q5    | LEF-1                | LEF1   | 0.379414  | 2          |

hsa-mir-345

| Matrix_id      | transcription factor | Gene   | PCC       | Occurrence |
|----------------|----------------------|--------|-----------|------------|
| V\$NFAT4_Q3    | NF-AT4               | NFATC3 | 0.116622  | 5          |
| V\$Elf5_03     | ELF5                 | ELF5   | 0.223725  | 5          |
| V\$ZIC3_01     | Zic3                 | ZIC3   | 0.378288  | 5          |
| V\$TBX5_02     | TBX5                 | TBX5   | 0.3038    | 5          |
| V\$AP2REP_01   | AP-2rep              | KLF12  | 0.437791  | 5          |
| V\$PUR1_Q4     | PUR1                 | PURA   | 0.442322  | 5          |
| V\$GABPA_Q4    | GABP-alpha           | GABPA  | 0.31736   | 5          |
| V\$PEA3_Q6     | PEA3                 | ETV4   | 0.301631  | 5          |
| V\$CDX2_Q5_02  | CDX-2                | CDX2   | 0.4008    | 5          |
| V\$IK_Q5       | Ikaros               | IKZF1  | 0.309139  | 5          |
| V\$TBP_Q6      | TBP                  | TBP    | 0.207674  | 5          |
| V\$CETS1_Q6    | C-ets-1              | ETS1   | 0.234633  | 5          |
| V\$P300_01     | p300                 | EP300  | 0.383043  | 5          |
| V\$MAFB_01     | MAFB                 | MAFB   | 0.0546553 | 5          |
| V\$SMAD4_Q6_01 | Smad4                | SMAD4  | 0.339399  | 5          |
| V\$GATA1_01    | GATA-1               | GATA1  | 0.29248   | 5          |

|                |            |        |            |   |
|----------------|------------|--------|------------|---|
| V\$HIF1A_Q6    | HIF-1alpha | HIF1A  | 0.466635   | 5 |
| V\$ARNT_01     | Arnt       | ARNT   | 0.171256   | 5 |
| V\$SOX10_Q6    | SOX10      | SOX10  | 0.602438   | 4 |
| V\$TBX5_01     | TBX5       | TBX5   | 0.3038     | 4 |
| V\$SOX9_Q4     | SOX9       | SOX9   | 0.446474   | 4 |
| V\$ETS2_Q6     | c-Ets-2    | ETS2   | 0.280203   | 4 |
| V\$HNF3A_01    | HNF3A      | FOXA1  | 0.369226   | 4 |
| V\$CDX2_01     | Cdx-2      | CDX2   | 0.4008     | 4 |
| V\$PARP_Q4     | PARP       | PARP1  | 0.488017   | 4 |
| V\$SPI1_Q5     | SPI1       | SPI1   | 0.0268809  | 4 |
| V\$PBX1_Q3     | Pbx1       | PBX1   | 0.268786   | 4 |
| V\$GR_01       | GR         | NR3C1  | 0.395673   | 4 |
| V\$HNF3B_Q6    | HNF-3beta  | FOXA2  | 0.26571    | 4 |
| V\$GATA1_05    | GATA-1     | GATA1  | 0.29248    | 4 |
| V\$GR_Q6       | GR         | NR3C1  | 0.395673   | 4 |
| V\$YY1_Q6_03   | YY1        | YY1    | 0.465057   | 4 |
| V\$ETS1_B      | c-Ets-1    | ETS1   | 0.234633   | 4 |
| V\$GATA1_06    | GATA-1     | GATA1  | 0.29248    | 4 |
| V\$NR1B2_Q6    | NR1B2      | RARB   | 0.472016   | 4 |
| V\$HNF4A_Q6_01 | HNF-4alpha | HNF4A  | 0.284069   | 4 |
| V\$TEF1_Q6_03  | TEF-1      | TEAD1  | 0.415532   | 4 |
| V\$GATA6_01    | GATA-6     | GATA6  | 0.0634063  | 4 |
| V\$CDX2_Q5_01  | Cdx-2      | CDX2   | 0.4008     | 4 |
| V\$AML1_Q6     | AML1       | RUNX1  | 0.313813   | 4 |
| V\$FOXP3_01    | FOXP3      | FOXP3  | 0.39636    | 4 |
| V\$MEF2C_Q4    | MEF-2C     | MEF2C  | 0.536705   | 3 |
| V\$IPF1_Q6     | IPF1       | PDX1   | 0.450345   | 3 |
| V\$AML2_Q3     | AML2       | RUNX3  | 0.0108791  | 3 |
| V\$ERBETA_Q5   | ER-beta    | ESR2   | 0.336451   | 3 |
| V\$CDX1_01     | Cdx-1      | CDX1   | 0.362091   | 3 |
| V\$TTF1_Q5     | TTF-1      | NKX2-1 | 0.332642   | 3 |
| V\$NANOG_02    | Nanog      | NANOG  | 0.426255   | 3 |
| V\$CREL_01     | c-Rel      | REL    | 0.270234   | 3 |
| V\$GFI1_Q6     | Gfi1       | GFI1   | 0.0832091  | 3 |
| V\$CMAF_01     | c-Maf      | MAF    | 0.201735   | 3 |
| V\$MYB_Q6      | c-Myb      | MYB    | 0.100385   | 3 |
| V\$IPF1_Q4_01  | IPF1       | PDX1   | 0.450345   | 3 |
| V\$NKX32_01    | Nkx3-2     | NKX3-2 | 0.427066   | 3 |
| V\$MEIS1_01    | MEIS1      | MEIS1  | 0.0150208  | 3 |
| V\$CMYB_Q5     | c-Myb      | MYB    | 0.100385   | 3 |
| V\$TCF4_01     | TCF-4      | TCF7L2 | 0.00739518 | 2 |
| V\$CRX_Q4_01   | CRX        | CRX    | 0.367308   | 2 |
| V\$NFAT2_Q5    | NF-AT2     | NFATC1 | 0.422432   | 2 |
| V\$FOXM1_01    | FOXM1      | FOXM1  | 0.129656   | 2 |
| V\$RFX1_01     | RFX1       | RFX1   | 0.433161   | 2 |
| V\$HOXD9_Q2    | Hoxd9      | HOXD9  | 0.331713   | 2 |

|               |            |         |           |   |
|---------------|------------|---------|-----------|---|
| V\$IPF1_Q4    | IPF1       | PDX1    | 0.450345  | 2 |
| V\$RFX1_02    | RFX1       | RFX1    | 0.433161  | 2 |
| V\$TEF1_Q6    | TEF-1      | TEAD1   | 0.415532  | 2 |
| V\$NURR1_Q3   | NURR1      | NR4A2   | 0.577339  | 2 |
| V\$IPF1_01    | IPF1       | PDX1    | 0.450345  | 2 |
| V\$PARP_Q3    | PARP       | PARP1   | 0.488017  | 2 |
| V\$PBX1_04    | Pbx1       | PBX1    | 0.268786  | 2 |
| V\$FOXO3A_Q1  | FOXO3A     | FOXO3   | 0.27334   | 2 |
| V\$KAISO_01   | KAISO      | ZBTB33  | 0.379757  | 2 |
| V\$YY1_Q6_02  | YY1        | YY1     | 0.465057  | 2 |
| V\$YY1_Q6     | YY1        | YY1     | 0.465057  | 2 |
| V\$AML1_01    | AML1a      | RUNX1   | 0.313813  | 2 |
| V\$LHX3b_01   | LHX3b      | LHX3    | 0.478336  | 1 |
| V\$OC2_Q3     | OC-2       | ONECUT2 | 0.558597  | 1 |
| V\$MITF_Q6    | MITF       | MITF    | 0.212375  | 1 |
| V\$BCL6_Q3_01 | Bcl-6      | BCL6    | 0.404348  | 1 |
| V\$CMYB_01    | c-Myb      | MYB     | 0.100385  | 1 |
| V\$YY1_03     | YY1        | YY1     | 0.465057  | 1 |
| V\$STAT5A_Q6  | STAT5A     | STAT5A  | 0.0672547 | 1 |
| V\$TGIF_01    | TGIF       | TGIF1   | 0.0192112 | 1 |
| V\$HNF6_Q6    | HNF6       | ONECUT1 | 0.423477  | 1 |
| V\$IRF1_Q6    | IRF-1      | IRF1    | 0.0138021 | 1 |
| V\$PIT1_Q6    | Pit-1      | POU1F1  | 0.348329  | 1 |
| V\$IPF1_03    | IPF1       | PDX1    | 0.450345  | 1 |
| V\$PLZF_02    | PLZF       | ZBTB16  | 0.279435  | 1 |
| V\$CART1_02   | CART1      | ALX1    | 0.477732  | 1 |
| V\$HNF1_02    | HNF-1alpha | HNF1A   | 0.287489  | 1 |
| V\$NCX_02     | Ncx        | TLX2    | 0.386285  | 1 |
| V\$HNF1B_01   | HNF-1beta  | HNF1B   | 0.21402   | 1 |
| V\$IPF1_06    | ipf1       | PDX1    | 0.450345  | 1 |
| V\$HOX13_02   | HOXA5      | HOXA5   | 0.276497  | 1 |
| V\$NKX32_02   | Nkx3-2     | NKX3-2  | 0.427066  | 1 |
| V\$IRF1_Q6_01 | IRF-1      | IRF1    | 0.0138021 | 1 |
| V\$YY1_02     | YY1        | YY1     | 0.465057  | 1 |

hsa-mir-346

| Matrix_id   | transcription factor | Gene  | PCC      | Occurrence |
|-------------|----------------------|-------|----------|------------|
| V\$PUR1_Q4  | PUR1                 | PURA  | 0.413645 | 468        |
| V\$MAFB_01  | MAFB                 | MAFB  | 0.211012 | 431        |
| V\$PARP_Q4  | PARP                 | PARP1 | 0.405642 | 430        |
| V\$YY1_01   | YY1                  | YY1   | 0.163197 | 342        |
| V\$MEF2C_Q4 | MEF-2C               | MEF2C | 0.79053  | 339        |

|              |        |        |            |     |
|--------------|--------|--------|------------|-----|
| V\$GR_Q6     | GR     | NR3C1  | 0.0673289  | 338 |
| V\$DLX5_01   | dlx5   | DLX5   | 0.00404639 | 320 |
| V\$YY1_Q6    | YY1    | YY1    | 0.163197   | 314 |
| V\$YY1_Q6_02 | YY1    | YY1    | 0.163197   | 308 |
| V\$SOX9_B1   | SOX9   | SOX9   | 0.297248   | 307 |
| V\$PARP_Q3   | PARP   | PARP1  | 0.405642   | 280 |
| V\$SRY_02    | SRY    | SRY    | 0.172584   | 280 |
| V\$ELK1_02   | Elk-1  | ELK1   | 0.105538   | 259 |
| V\$FOXO3A_Q1 | FOXO3A | FOXO3  | 0.00097435 | 254 |
| V\$PITX3_Q2  | PITX3  | PITX3  | 0.0778311  | 253 |
| V\$PBX1_04   | Pbx1   | PBX1   | 0.305721   | 253 |
| V\$YY1_Q6_03 | YY1    | YY1    | 0.163197   | 241 |
| V\$ELK1_06   | ELK-1  | ELK1   | 0.105538   | 225 |
| V\$EHF_03    | EHF    | EHF    | 0.035893   | 205 |
| V\$ERF_02    | ERF    | ERF    | 0.177365   | 203 |
| V\$GR_01     | GR     | NR3C1  | 0.0673289  | 196 |
| V\$MEF2A_Q6  | mef2A  | MEF2A  | 0.677405   | 146 |
| V\$DBP_Q6_01 | DBP    | DBP    | 0.315027   | 145 |
| V\$CDP_04    | CDP    | CUX1   | 0.0481611  | 71  |
| V\$POU6F1_03 | POU6F1 | POU6F1 | 0.34266    | 65  |
| V\$AMEF2_Q6  | aMEF-2 | MEF2A  | 0.677405   | 52  |
| V\$RSRFC4_Q2 | RSRFC4 | MEF2A  | 0.677405   | 40  |
| V\$GRE_C     | GR     | NR3C1  | 0.0673289  | 29  |
| V\$MEF2A_05  | MEF2A  | MEF2A  | 0.677405   | 20  |

hsa-mir-34c

| Matrix_id    | transcription factor | Gene   | PCC       | Occurrence |
|--------------|----------------------|--------|-----------|------------|
| V\$AP2REP_01 | AP-2rep              | KLF12  | 0.0855397 | 244        |
| V\$GKLF_Q4   | GKLF                 | KLF4   | 0.377182  | 240        |
| V\$PARP_Q4   | PARP                 | PARP1  | 0.214071  | 238        |
| V\$PEA3_Q6   | PEA3                 | ETV4   | 0.146561  | 237        |
| V\$P300_01   | p300                 | EP300  | 0.0729686 | 236        |
| V\$TBP_Q6    | TBP                  | TBP    | 0.725656  | 215        |
| V\$ZIC3_01   | Zic3                 | ZIC3   | 0.230397  | 214        |
| V\$NFAT4_Q3  | NF-AT4               | NFATC3 | 0.0406524 | 205        |
| V\$GATA1_01  | GATA-1               | GATA1  | 0.108629  | 205        |
| V\$YY1_01    | YY1                  | YY1    | 0.183     | 204        |
| V\$ETS1_B    | c-Ets-1              | ETS1   | 0.0547252 | 201        |
| V\$CETS1_Q6  | C-ets-1              | ETS1   | 0.0547252 | 195        |
| V\$DLX5_01   | dlx5                 | DLX5   | 0.310251  | 189        |
| V\$Elf5_03   | ELF5                 | ELF5   | 0.194918  | 184        |
| V\$SOX5_01   | SOX5                 | SOX5   | 0.571417  | 181        |

|                   |            |        |           |     |
|-------------------|------------|--------|-----------|-----|
| V\$SOX9_B1        | SOX9       | SOX9   | 0.758408  | 181 |
| V\$AML1_Q6        | AML1       | RUNX1  | 0.267972  | 180 |
| V\$SRY_02         | SRY        | SRY    | 0.21059   | 162 |
| V\$GATA1_02       | GATA-1     | GATA1  | 0.108629  | 162 |
| V\$AP4_Q6_02      | AP-4       | TFAP4  | 0.0875805 | 158 |
| V\$FOXO3A_Q1      | FOXO3A     | FOXO3  | 0.0565175 | 157 |
| V\$NKX32_01       | Nkx3-2     | NKX3-2 | 0.266625  | 154 |
| V\$MAZ_Q6         | MAZ        | MAZ    | 0.307648  | 152 |
| V\$E2A_Q6         | E2A        | TCF3   | 0.404414  | 152 |
| V\$E12_Q6         | E12        | TCF3   | 0.404414  | 152 |
| V\$ING4_01        | ING4       | ING4   | 0.0148851 | 152 |
| V\$E47_02         | E47        | TCF3   | 0.404414  | 152 |
| V\$ERBETA_Q5      | ER-beta    | ESR2   | 0.175775  | 151 |
| V\$HNF3B_Q6       | HNF-3beta  | FOXA2  | 0.0940334 | 146 |
| V\$HMGY1_Q1       | HMGY1      | HMGY1  | 0.636171  | 142 |
| V\$HIF1A_Q6       | HIF-1alpha | HIF1A  | 0.077409  | 131 |
| V\$PITX1_01       | Pitx1      | PITX1  | 0.0198438 | 130 |
| V\$GATA1_04       | GATA-1     | GATA1  | 0.108629  | 128 |
| V\$FOXJ2_01       | FOXJ2      | FOXJ2  | 0.324129  | 126 |
| V\$NFAT2_Q5       | NF-AT2     | NFATC1 | 0.155941  | 125 |
| V\$FOXM1_01       | FOXM1      | FOXM1  | 0.721505  | 125 |
| V\$CREM_Q6        | CREM       | CREM   | 0.437026  | 123 |
| V\$MYOGENIN_Q6    | myogenin   | MYOG   | 0.160035  | 122 |
| V\$IRF8_Q6        | IRF-8      | IRF8   | 0.104782  | 114 |
| V\$AP4_Q5         | AP-4       | TFAP4  | 0.0875805 | 113 |
| V\$GABPBETA_Q3    | GABP-beta  | GABPB1 | 0.0873224 | 106 |
| V\$AML2_Q3        | AML2       | RUNX3  | 0.0941956 | 102 |
| V\$AML1_01        | AML1a      | RUNX1  | 0.267972  | 102 |
| V\$ELF5_01        | ELF5       | ELF5   | 0.194918  | 96  |
| V\$AML1_Q4        | AML1       | RUNX1  | 0.267972  | 92  |
| V\$FAC1_01        | FAC1       | BPTF   | 0.0279562 | 92  |
| V\$AP4_Q6         | AP-4       | TFAP4  | 0.0875805 | 90  |
| V\$E47_01         | E47        | TCF3   | 0.404414  | 88  |
| V\$FOXO4_Q2       | FOXO4      | FOXO4  | 0.0216649 | 81  |
| V\$HOXD9_Q2       | Hoxd9      | HOXD9  | 0.0458822 | 79  |
| V\$MYOGENIN_Q6_01 | myogenin   | MYOG   | 0.160035  | 78  |
| V\$LHX3b_01       | LHX3b      | LHX3   | 0.114691  | 74  |
| V\$TR4_Q2         | TR4        | NR2C2  | 0.0850578 | 65  |
| V\$AML2_01        | AML2       | RUNX3  | 0.0941956 | 60  |
| V\$P53_Q2         | p53        | TP53   | 0.0693211 | 58  |
| V\$MATH1_Q2       | MATH1      | ATOH1  | 0.133533  | 53  |
| V\$HOXB8_Q1       | HOXB8      | HOXB8  | 0.344733  | 48  |
| V\$ATF2_Q5        | ATF-2      | ATF2   | 0.0742922 | 42  |
| V\$ATF6_Q1        | ATF6       | ATF6   | 0.182334  | 39  |
| V\$FOXO4_Q1       | FOXO4      | FOXO4  | 0.0216649 | 36  |
| V\$GCNF_Q3        | GCNF       | NR6A1  | 0.5227    | 21  |

|              |     |      |           |    |
|--------------|-----|------|-----------|----|
| V\$P53_Q4    | p53 | TP53 | 0.0693211 | 19 |
| V\$SRF_C     | SRF | SRF  | 0.0148034 | 14 |
| V\$SRF_Q6    | SRF | SRF  | 0.0148034 | 10 |
| V\$SRF_Q5_Q2 | SRF | SRF  | 0.0148034 | 10 |
| V\$P53_Q5    | p53 | TP53 | 0.0693211 | 1  |

hsa-mir-361

| Matrix_id      | transcription factor | Gene    | PCC        | Occurrence |
|----------------|----------------------|---------|------------|------------|
| V\$PARP_Q4     | PARP                 | PARP1   | 0.242741   | 3          |
| V\$PUR1_Q4     | PUR1                 | PURA    | 0.575586   | 3          |
| V\$DLX5_Q1     | dlx5                 | DLX5    | 0.433865   | 3          |
| V\$HBP1_Q2     | hbp1                 | HBP1    | 0.338652   | 3          |
| V\$YY1_Q6_Q3   | YY1                  | YY1     | 0.319166   | 3          |
| V\$FOXO3A_Q1   | FOXO3A               | FOXO3   | 0.0996141  | 3          |
| V\$NURR1_Q3    | NURR1                | NR4A2   | 0.29215    | 2          |
| V\$PARP_Q3     | PARP                 | PARP1   | 0.242741   | 2          |
| V\$HOXA9_Q1    | hoxa9                | HOXA9   | 0.190704   | 2          |
| V\$ETS2_Q6     | c-Ets-2              | ETS2    | 0.105998   | 2          |
| V\$PITX2_Q1    | PITX2                | PITX2   | 0.20834    | 2          |
| V\$GABPA_Q4    | GABP-alpha           | GABPA   | 0.153389   | 2          |
| V\$SOX9_Q4     | SOX9                 | SOX9    | 0.0310897  | 2          |
| V\$TCF4_Q1     | TCF-4                | TCF7L2  | 0.251462   | 2          |
| V\$MEF2C_Q4    | MEF-2C               | MEF2C   | 0.424149   | 2          |
| V\$HNF4A_Q6_Q1 | HNF-4alpha           | HNF4A   | 0.0391071  | 2          |
| V\$LHX3b_Q1    | LHX3b                | LHX3    | 0.0656073  | 2          |
| V\$SMAD4_Q6_Q1 | Smad4                | SMAD4   | 0.239438   | 2          |
| V\$AP4_Q6_Q2   | AP-4                 | TFAP4   | 0.264997   | 2          |
| V\$HOXD9_Q2    | Hoxd9                | HOXD9   | 0.0803202  | 2          |
| V\$OC2_Q3      | OC-2                 | ONECUT2 | 0.00735986 | 2          |
| V\$PITX3_Q2    | PITX3                | PITX3   | 0.174056   | 2          |
| V\$SOX10_Q6    | SOX10                | SOX10   | 0.272868   | 2          |
| V\$TBP_Q6      | TBP                  | TBP     | 0.116391   | 2          |
| V\$GATA3_Q3    | GATA-3               | GATA3   | 0.335796   | 2          |
| V\$GATA2_Q2    | GATA-2               | GATA2   | 0.394243   | 2          |
| V\$SOX9_B1     | SOX9                 | SOX9    | 0.0310897  | 2          |
| V\$GATA6_Q1    | GATA-6               | GATA6   | 0.227973   | 2          |
| V\$PITX2_Q2    | Pitx2                | PITX2   | 0.20834    | 2          |
| V\$SRY_Q2      | SRY                  | SRY     | 0.179844   | 2          |
| V\$TCF4_Q5     | TCF-4                | TCF7L2  | 0.251462   | 2          |
| V\$TEF1_Q6     | TEF-1                | TEAD1   | 0.0138214  | 2          |
| V\$YY1_Q1      | YY1                  | YY1     | 0.319166   | 2          |
| V\$P300_Q1     | p300                 | EP300   | 0.163468   | 2          |



|               |        |        |           |   |
|---------------|--------|--------|-----------|---|
| V\$YY1_Q6     | YY1    | YY1    | 0.319166  | 2 |
| V\$PBX1_Q4    | Pbx1   | PBX1   | 0.577604  | 2 |
| V\$CDP_Q2     | CDP    | CUX1   | 0.46026   | 1 |
| V\$YY1_Q3     | YY1    | YY1    | 0.319166  | 1 |
| V\$STAT5A_Q6  | STAT5A | STAT5A | 0.292727  | 1 |
| V\$CDP_Q1     | CDP    | CUX1   | 0.46026   | 1 |
| V\$GATA3_Q1   | GATA-3 | GATA3  | 0.335796  | 1 |
| V\$PBX1_Q3    | Pbx1   | PBX1   | 0.577604  | 1 |
| V\$GATA2_Q1   | GATA-2 | GATA2  | 0.394243  | 1 |
| V\$AP4_Q5     | AP-4   | TFAP4  | 0.264997  | 1 |
| V\$AP4_Q6     | AP-4   | TFAP4  | 0.264997  | 1 |
| V\$GR_Q1      | GR     | NR3C1  | 0.276212  | 1 |
| V\$PIT1_Q6    | Pit-1  | POU1F1 | 0.0624736 | 1 |
| V\$CIZ_Q1     | CIZ    | ZNF384 | 0.172328  | 1 |
| V\$SOX2_Q6    | SOX2   | SOX2   | 0.157375  | 1 |
| V\$AP4_Q6_Q1  | AP-4   | TFAP4  | 0.264997  | 1 |
| V\$HOX13_Q2   | HOXA5  | HOXA5  | 0.314794  | 1 |
| V\$FOXJ2_Q1   | FOXJ2  | FOXJ2  | 0.114989  | 1 |
| V\$YY1_Q6_Q2  | YY1    | YY1    | 0.319166  | 1 |
| V\$GR_Q6      | GR     | NR3C1  | 0.276212  | 1 |
| V\$TEF1_Q6_Q3 | TEF-1  | TEAD1  | 0.0138214 | 1 |

hsa-mir-362

| Matrix_id      | transcription factor | Gene   | PCC      | Occurrence |
|----------------|----------------------|--------|----------|------------|
| V\$ZIC3_Q1     | Zic3                 | ZIC3   | 0.190077 | 15         |
| V\$AP2REP_Q1   | AP-2rep              | KLF12  | 0.216454 | 15         |
| V\$IK_Q5       | Ikaros               | IKZF1  | 0.174526 | 15         |
| V\$NFAT4_Q3    | NF-AT4               | NFATC3 | 0.129991 | 15         |
| V\$PUR1_Q4     | PUR1                 | PURA   | 0.098406 | 15         |
| V\$GKLF_Q4     | GKLF                 | KLF4   | 0.228678 | 14         |
| V\$P300_Q1     | p300                 | EP300  | 0.506506 | 14         |
| V\$PARP_Q4     | PARP                 | PARP1  | 0.189432 | 14         |
| V\$TBP_Q6      | TBP                  | TBP    | 0.295682 | 13         |
| V\$CDX2_Q5_Q2  | CDX-2                | CDX2   | 0.290073 | 13         |
| V\$IPF1_Q6     | IPF1                 | PDX1   | 0.292057 | 13         |
| V\$SMAD4_Q6_Q1 | Smad4                | SMAD4  | 0.414288 | 13         |
| V\$NKX32_Q1    | Nkx3-2               | NKX3-2 | 0.232451 | 13         |
| V\$IPF1_Q4_Q1  | IPF1                 | PDX1   | 0.292057 | 12         |
| V\$TBX5_Q2     | TBX5                 | TBX5   | 0.289095 | 12         |
| V\$NFAT2_Q5    | NF-AT2               | NFATC1 | 0.201332 | 12         |
| V\$YY1_Q1      | YY1                  | YY1    | 0.225514 | 12         |
| V\$SOX5_Q1     | SOX5                 | SOX5   | 0.195692 | 12         |

|                |            |          |           |    |
|----------------|------------|----------|-----------|----|
| V\$SRY_02      | SRY        | SRY      | 0.124663  | 12 |
| V\$NANOG_02    | Nanog      | NANOG    | 0.26821   | 11 |
| V\$NR1B2_Q6    | NR1B2      | RARB     | 0.213143  | 11 |
| V\$CRX_Q4_01   | CRX        | CRX      | 0.284592  | 11 |
| V\$SMAD3_Q6_01 | Smad3      | SMAD3    | 0.183753  | 11 |
| V\$CDX2_Q5_01  | Cdx-2      | CDX2     | 0.290073  | 11 |
| V\$BEN_01      | BEN        | GTF2IRD1 | 0.241581  | 11 |
| V\$AML1_Q6     | AML1       | RUNX1    | 0.112051  | 10 |
| V\$GATA3_02    | GATA-3     | GATA3    | 0.698433  | 10 |
| V\$HNF3A_01    | HNF3A      | FOXA1    | 0.0273748 | 10 |
| V\$TBX5_01     | TBX5       | TBX5     | 0.289095  | 10 |
| V\$IPF1_Q4     | IPF1       | PDX1     | 0.292057  | 10 |
| V\$GR_Q6       | GR         | NR3C1    | 0.274419  | 10 |
| V\$AP2ALPHA_01 | AP-2alpha  | TFAP2A   | 0.762469  | 10 |
| V\$GATA2_02    | GATA-2     | GATA2    | 0.676145  | 10 |
| V\$YY1_Q6_02   | YY1        | YY1      | 0.225514  | 9  |
| V\$DLX5_01     | dlx5       | DLX5     | 0.666326  | 9  |
| V\$HNF4A_Q6_01 | HNF-4alpha | HNF4A    | 0.0166495 | 9  |
| V\$HMG1Y_01    | HMG1Y      | HMGA1    | 0.170144  | 9  |
| V\$CRX_Q4      | Crx        | CRX      | 0.284592  | 9  |
| V\$PARP_Q3     | PARP       | PARP1    | 0.189432  | 9  |
| V\$YY1_Q6      | YY1        | YY1      | 0.225514  | 9  |
| V\$IPF1_01     | IPF1       | PDX1     | 0.292057  | 9  |
| V\$PITX3_Q2    | PITX3      | PITX3    | 0.154201  | 9  |
| V\$YY1_Q6_03   | YY1        | YY1      | 0.225514  | 9  |
| V\$CDX2_01     | Cdx-2      | CDX2     | 0.290073  | 8  |
| V\$ZBP89_Q4    | ZBP89      | ZNF148   | 0.0269183 | 8  |
| V\$NKX32_02    | Nkx3-2     | NKX3-2   | 0.232451  | 8  |
| V\$IRF8_Q6     | IRF-8      | IRF8     | 0.0550092 | 8  |
| V\$AHR_Q5      | AhR        | AHR      | 0.61451   | 8  |
| V\$SP1_Q6      | Sp1        | SP1      | 0.505314  | 8  |
| V\$TEF1_Q6_03  | TEF-1      | TEAD1    | 0.348281  | 8  |
| V\$FOXJ2_01    | FOXJ2      | FOXJ2    | 0.257759  | 8  |
| V\$LHX3b_01    | LHX3b      | LHX3     | 0.211605  | 7  |
| V\$HIF1A_Q6    | HIF-1alpha | HIF1A    | 0.0177167 | 7  |
| V\$PITX2_01    | PITX2      | PITX2    | 0.610552  | 7  |
| V\$BCL6_Q3_01  | Bcl-6      | BCL6     | 0.240916  | 7  |
| V\$SP1_Q2      | SP1        | SP1      | 0.505314  | 7  |
| V\$SP1_Q2_01   | Sp1        | SP1      | 0.505314  | 7  |
| V\$SP1_Q4_01   | Sp1        | SP1      | 0.505314  | 7  |
| V\$SP1_Q6_01   | Sp1        | SP1      | 0.505314  | 7  |
| V\$ARNT_01     | Arnt       | ARNT     | 0.541924  | 7  |
| V\$CEBPB_02    | C/EBPbeta  | CEBPB    | 0.410043  | 7  |
| V\$RFX1_02     | RFX1       | RFX1     | 0.276688  | 7  |
| V\$GATA3_01    | GATA-3     | GATA3    | 0.698433  | 7  |
| V\$SREBP1_Q6   | SREBP-1    | SREBF1   | 0.0735677 | 7  |

|                |            |        |            |   |
|----------------|------------|--------|------------|---|
| V\$GATA2_01    | GATA-2     | GATA2  | 0.676145   | 7 |
| V\$TCF4_Q5     | TCF-4      | TCF7L2 | 0.171632   | 7 |
| V\$PITX2_Q2    | Pitx2      | PITX2  | 0.610552   | 7 |
| V\$TEF1_Q6     | TEF-1      | TEAD1  | 0.348281   | 6 |
| V\$AP2GAMMA_01 | AP-2gamma  | TFAP2C | 0.716064   | 6 |
| V\$TCF4_01     | TCF-4      | TCF7L2 | 0.171632   | 6 |
| V\$IRF7_Q3     | IRF-7      | IRF7   | 0.00306403 | 6 |
| V\$ZABC1_01    | ZABC1      | ZNF217 | 0.645854   | 6 |
| V\$PITX1_01    | Pitx1      | PITX1  | 0.226697   | 6 |
| V\$WT1_Q6_01   | WT1        | WT1    | 0.135075   | 6 |
| V\$POU6F1_03   | POU6F1     | POU6F1 | 0.153532   | 6 |
| V\$CRX_02      | Crx        | CRX    | 0.284592   | 6 |
| V\$CDP_04      | CDP        | CUX1   | 0.169744   | 5 |
| V\$FOXO4_02    | FOXO4      | FOXO4  | 0.720096   | 5 |
| V\$NCX_02      | Ncx        | TLX2   | 0.112141   | 5 |
| V\$SP2_01      | SP2        | SP2    | 0.145214   | 5 |
| V\$CEBPG_Q6_01 | C/EBPgamma | CEBPG  | 0.286787   | 5 |
| V\$SMAD3_Q6    | SMAD3      | SMAD3  | 0.183753   | 5 |
| V\$POU6F1_02   | POU6F1     | POU6F1 | 0.153532   | 5 |
| V\$CP2_01      | CP2        | TFCP2  | 0.440291   | 4 |
| V\$STAT4_Q5    | STAT4      | STAT4  | 0.252212   | 4 |
| V\$YY1_02      | YY1        | YY1    | 0.225514   | 4 |
| V\$HOXA9_01    | hoxa9      | HOXA9  | 0.395195   | 4 |
| V\$CART1_02    | CART1      | ALX1   | 0.319631   | 4 |
| V\$CDX1_01     | Cdx-1      | CDX1   | 0.147711   | 4 |
| V\$GATA3_03    | GATA-3     | GATA3  | 0.698433   | 4 |
| V\$IPF1_02     | IPF1       | PDX1   | 0.292057   | 4 |
| V\$E2F1_Q3_01  | E2F-1      | E2F1   | 0.0255613  | 4 |
| V\$HOX13_02    | HOXA5      | HOXA5  | 0.0618025  | 4 |
| V\$IPF1_06     | ipf1       | PDX1   | 0.292057   | 4 |
| V\$STAT1_05    | STAT1      | STAT1  | 0.0398253  | 3 |
| V\$IPF1_03     | IPF1       | PDX1   | 0.292057   | 3 |
| V\$GATA2_03    | GATA-2     | GATA2  | 0.676145   | 3 |
| V\$HOXD9_Q2    | Hoxd9      | HOXD9  | 0.154698   | 3 |
| V\$NRF1_Q6     | NRF-1      | NRF1   | 0.323133   | 2 |
| V\$BACH2_01    | Bach2      | BACH2  | 0.210081   | 2 |
| V\$YY1_03      | YY1        | YY1    | 0.225514   | 1 |

hsa-mir-365a

| Matrix_id   | transcription factor | Gene   | PCC      | Occurrence |
|-------------|----------------------|--------|----------|------------|
| V\$ETS1_B   | c-Ets-1              | ETS1   | 0.130054 | 4          |
| V\$NKX32_01 | Nkx3-2               | NKX3-2 | 0.432754 | 4          |

|                |            |          |            |   |
|----------------|------------|----------|------------|---|
| V\$ETS2_B      | c-Ets-2    | ETS2     | 0.326752   | 4 |
| V\$SP2_01      | SP2        | SP2      | 0.267868   | 4 |
| V\$LRF_Q2      | LRF        | ZBTB7A   | 0.466183   | 4 |
| V\$ZIC3_01     | Zic3       | ZIC3     | 0.0559569  | 4 |
| V\$AP2REP_01   | AP-2rep    | KLF12    | 0.548359   | 4 |
| V\$AP2ALPHA_01 | AP-2alpha  | TFAP2A   | 0.461993   | 4 |
| V\$TBX5_02     | TBX5       | TBX5     | 0.479463   | 4 |
| V\$TBX5_01     | TBX5       | TBX5     | 0.479463   | 4 |
| V\$MAZ_Q6      | MAZ        | MAZ      | 0.0169194  | 4 |
| V\$PEA3_Q6     | PEA3       | ETV4     | 0.583692   | 4 |
| V\$SP1_Q2_01   | Sp1        | SP1      | 0.622868   | 4 |
| V\$SP1_Q4_01   | Sp1        | SP1      | 0.622868   | 4 |
| V\$SP1_Q6_01   | Sp1        | SP1      | 0.622868   | 4 |
| V\$CETS1_Q6    | C-ets-1    | ETS1     | 0.130054   | 4 |
| V\$AP2BETA_Q3  | AP-2beta   | TFAP2B   | 0.585111   | 4 |
| V\$ETS2_Q6     | c-Ets-2    | ETS2     | 0.326752   | 4 |
| V\$PUR1_Q4     | PUR1       | PURA     | 0.224183   | 4 |
| V\$SP1_01      | Sp1        | SP1      | 0.622868   | 4 |
| V\$GABPA_Q4    | GABP-alpha | GABPA    | 0.410494   | 4 |
| V\$GATA1_01    | GATA-1     | GATA1    | 0.0617652  | 4 |
| V\$SP1_02      | SP1        | SP1      | 0.622868   | 4 |
| V\$AML1_Q6     | AML1       | RUNX1    | 0.264994   | 4 |
| V\$SP1_Q6      | Sp1        | SP1      | 0.622868   | 4 |
| V\$IK_Q5       | Ikaros     | IKZF1    | 0.506018   | 4 |
| V\$BEN_01      | BEN        | GTF2IRD1 | 0.565783   | 4 |
| V\$FOXP3_01    | FOXP3      | FOXP3    | 0.595191   | 3 |
| V\$AHR_Q5      | AhR        | AHR      | 0.254826   | 3 |
| V\$SOX10_Q6    | SOX10      | SOX10    | 0.0986482  | 3 |
| V\$YY1_Q6_02   | YY1        | YY1      | 0.225564   | 3 |
| V\$FKLF_Q5     | FKLF       | KLF11    | 0.0593576  | 3 |
| V\$ZBP89_Q4    | ZBP89      | ZNF148   | 0.369246   | 3 |
| V\$KLF15_Q2    | KLF15      | KLF15    | 0.0293971  | 3 |
| V\$E2F1_Q3_01  | E2F-1      | E2F1     | 0.270359   | 3 |
| V\$AP2ALPHA_02 | AP-2alphaA | TFAP2A   | 0.461993   | 3 |
| V\$E2A_Q6      | E2A        | TCF3     | 0.323156   | 3 |
| V\$TBP_Q6      | TBP        | TBP      | 0.148473   | 3 |
| V\$NANOG_02    | Nanog      | NANOG    | 0.507456   | 3 |
| V\$AP2ALPHA_Q6 | AP-2alpha  | TFAP2A   | 0.461993   | 3 |
| V\$PDEF_02     | PDEF       | SPDEF    | 0.00844804 | 3 |
| V\$ELK1_06     | ELK-1      | ELK1     | 0.507991   | 3 |
| V\$GATA2_01    | GATA-2     | GATA2    | 0.466187   | 3 |
| V\$ER71_02     | ER71       | ETV2     | 0.294604   | 3 |
| V\$FOXJ2_01    | FOXJ2      | FOXJ2    | 0.481721   | 3 |
| V\$GATA3_01    | GATA-3     | GATA3    | 0.314489   | 3 |
| V\$CMYB_01     | c-Myb      | MYB      | 0.0386501  | 3 |
| V\$ETV3_02     | ETV3       | ETV3     | 0.338687   | 3 |

|                     |                      |        |           |   |
|---------------------|----------------------|--------|-----------|---|
| V\$TEL1_02          | TEL1                 | ETV6   | 0.562062  | 3 |
| V\$AP2GAMMA_01      | AP-2gamma            | TFAP2C | 0.497461  | 3 |
| V\$PARP_Q4          | PARP                 | PARP1  | 0.457459  | 3 |
| V\$CP2_01           | CP2                  | TFCP2  | 0.425321  | 3 |
| V\$SMAD4_Q6_01      | Smad4                | SMAD4  | 0.391335  | 3 |
| V\$ELK1_02          | Elk-1                | ELK1   | 0.507991  | 3 |
| V\$E12_Q6           | E12                  | TCF3   | 0.323156  | 3 |
| V\$HNF3B_Q6         | HNF-3beta            | FOXA2  | 0.19021   | 3 |
| V\$CDX2_Q5_02       | CDX-2                | CDX2   | 0.587654  | 3 |
| V\$P300_01          | p300                 | EP300  | 0.535778  | 3 |
| V\$MAZ_Q6_01        | MAZ                  | MAZ    | 0.0169194 | 3 |
| V\$SMAD3_Q6_01      | Smad3                | SMAD3  | 0.379041  | 3 |
| V\$SPIB_03          | Spi-B                | SPIB   | 0.192214  | 2 |
| V\$CREM_Q6          | CREM                 | CREM   | 0.462824  | 2 |
| V\$TEF1_Q6_03       | TEF-1                | TEAD1  | 0.611416  | 2 |
| V\$EKLF_Q5          | EKLF                 | KLF1   | 0.603123  | 2 |
| V\$ETV7_01          | ETV7                 | ETV7   | 0.581179  | 2 |
| V\$GABPBETA_Q3      | GABP-beta            | GABPB1 | 0.370293  | 2 |
| V\$EGR1_02          | EGR-1                | EGR1   | 0.0610934 | 2 |
| V\$MYOGENIN_Q6_01   | myogenin             | MYOG   | 0.44021   | 2 |
| V\$MEF2C_Q4         | MEF-2C               | MEF2C  | 0.213937  | 2 |
| V\$ERF_02           | ERF                  | ERF    | 0.112243  | 2 |
| V\$ATF3_Q6_01       | ATF-3                | ATF3   | 0.25106   | 2 |
| V\$ATF1_Q6_01       | ATF-1                | ATF1   | 0.128005  | 2 |
| V\$AP4_Q6_02        | AP-4                 | TFAP4  | 0.126427  | 2 |
| V\$ERM_02           | Erm                  | ETV5   | 0.473625  | 2 |
| V\$MYOD_Q6_02       | MyoD                 | MYOD1  | 0.59367   | 2 |
| V\$SP4_Q5           | SP4                  | SP4    | 0.434674  | 2 |
| V\$SREBP1_Q6        | SREBP-1              | SREBF1 | 0.335835  | 2 |
| V\$CACCCBINDINGFACT | CACCC-binding factor | ZNF148 | 0.369246  | 2 |
| V\$MYOGENIN_Q6      | myogenin             | MYOG   | 0.44021   | 2 |
| V\$TEF1_Q6          | TEF-1                | TEAD1  | 0.611416  | 2 |
| V\$AP4_Q6           | AP-4                 | TFAP4  | 0.126427  | 2 |
| V\$MYOD_Q6          | MyoD                 | MYOD1  | 0.59367   | 2 |
| V\$MTF1_Q4          | MTF-1                | MTF1   | 0.59351   | 2 |
| V\$ATF6_01          | ATF6                 | ATF6   | 0.583517  | 2 |
| V\$AP4_Q5           | AP-4                 | TFAP4  | 0.126427  | 2 |
| V\$E2F1_Q4          | E2F-1                | E2F1   | 0.270359  | 2 |
| V\$YY1_Q6           | YY1                  | YY1    | 0.225564  | 2 |
| V\$VDR_Q3           | VDR                  | VDR    | 0.567454  | 2 |
| V\$MATH1_Q2         | MATH1                | ATOH1  | 0.476702  | 2 |
| V\$STAT3_03         | STAT3                | STAT3  | 0.382854  | 2 |
| V\$CDX2_01          | Cdx-2                | CDX2   | 0.587654  | 2 |
| V\$SMAD3_Q6         | SMAD3                | SMAD3  | 0.379041  | 2 |
| V\$CNOT3_01         | CNOT3                | CNOT3  | 0.475232  | 2 |
| V\$GR_Q6            | GR                   | NR3C1  | 0.377163  | 2 |

|               |            |        |           |   |
|---------------|------------|--------|-----------|---|
| V\$CEBPA_01   | C/EBPalpha | CEBPA  | 0.0294349 | 2 |
| V\$AP4_01     | AP-4       | TFAP4  | 0.126427  | 1 |
| V\$PET1_02    | Pet-1      | FEV    | 0.389144  | 1 |
| V\$ELK1_01    | Elk-1      | ELK1   | 0.507991  | 1 |
| V\$CEBPA_Q6   | C/EBPalpha | CEBPA  | 0.0294349 | 1 |
| V\$BCL6_Q3_01 | Bcl-6      | BCL6   | 0.543886  | 1 |
| V\$RREB1_01   | RREB-1     | RREB1  | 0.515728  | 1 |
| V\$FLI1_02    | Fli-1      | FLI1   | 0.455928  | 1 |
| V\$STAT1_01   | STAT1      | STAT1  | 0.271881  | 1 |
| V\$ERG_03     | ERG        | ERG    | 0.604714  | 1 |
| V\$FAC1_01    | FAC1       | BPTF   | 0.0638982 | 1 |
| V\$AR_04      | AR         | AR     | 0.111623  | 1 |
| V\$SAP1A_01   | SAP-1a     | ELK4   | 0.608952  | 1 |
| V\$ATF2_Q5    | ATF-2      | ATF2   | 0.503795  | 1 |
| V\$CMF1_01    | c-Maf      | MAF    | 0.19451   | 1 |
| V\$ATF4_Q6    | ATF-4      | ATF4   | 0.655392  | 1 |
| V\$AR_03      | AR         | AR     | 0.111623  | 1 |
| V\$IRF4_Q6    | IRF-4      | IRF4   | 0.529476  | 1 |
| V\$STAT5A_Q6  | STAT5A     | STAT5A | 0.586201  | 1 |
| V\$ERG_01     | ERG        | ERG    | 0.604714  | 1 |
| V\$AR_01      | AR         | AR     | 0.111623  | 1 |
| V\$FOXO4_Q2   | FOXO4      | FOXO4  | 0.413191  | 1 |
| V\$STAT1_Q6   | STAT1      | STAT1  | 0.271881  | 1 |

hsa-mir-369

| Matrix_id      | transcription factor | Gene   | PCC       | Occurrence |
|----------------|----------------------|--------|-----------|------------|
| V\$MAFB_01     | MAFB                 | MAFB   | 0.139994  | 21         |
| V\$GKLF_Q4     | GKLF                 | KLF4   | 0.329988  | 21         |
| V\$PUR1_Q4     | PUR1                 | PURA   | 0.0296301 | 21         |
| V\$P300_01     | p300                 | EP300  | 0.187664  | 21         |
| V\$PARP_Q4     | PARP                 | PARP1  | 0.0865865 | 20         |
| V\$PEA3_Q6     | PEA3                 | ETV4   | 0.105346  | 20         |
| V\$ELF1_Q6     | Elf-1                | ELF1   | 0.0439128 | 19         |
| V\$SMAD4_Q6_01 | Smad4                | SMAD4  | 0.116426  | 17         |
| V\$GABPA_Q4    | GABP-alpha           | GABPA  | 0.243576  | 16         |
| V\$GR_Q6       | GR                   | NR3C1  | 0.0219837 | 15         |
| V\$HNF4A_Q6_01 | HNF-4alpha           | HNF4A  | 0.0207914 | 14         |
| V\$AP2ALPHA_Q6 | AP-2alpha            | TFAP2A | 0.601     | 14         |
| V\$YY1_Q6      | YY1                  | YY1    | 0.29772   | 14         |
| V\$GATA3_01    | GATA-3               | GATA3  | 0.567555  | 14         |
| V\$AHR_Q5      | AhR                  | AHR    | 0.568969  | 14         |
| V\$YY1_01      | YY1                  | YY1    | 0.29772   | 13         |

|                |           |         |           |    |
|----------------|-----------|---------|-----------|----|
| V\$YY1_Q6_02   | YY1       | YY1     | 0.29772   | 13 |
| V\$GATA2_01    | GATA-2    | GATA2   | 0.370963  | 13 |
| V\$PBX1_04     | Pbx1      | PBX1    | 0.133262  | 11 |
| V\$SMAD4_Q6    | SMAD4     | SMAD4   | 0.116426  | 10 |
| V\$FOXP3_01    | FOXP3     | FOXP3   | 0.0270266 | 10 |
| V\$ATF3_Q6_01  | ATF-3     | ATF3    | 0.285526  | 9  |
| V\$CREM_Q6     | CREM      | CREM    | 0.503532  | 9  |
| V\$GR_01       | GR        | NR3C1   | 0.0219837 | 9  |
| V\$PIT1_Q6     | Pit-1     | POU1F1  | 0.174978  | 8  |
| V\$YY1_02      | YY1       | YY1     | 0.29772   | 8  |
| V\$GABPBETA_Q3 | GABP-beta | GABPB1  | 0.167411  | 7  |
| V\$MAFK_Q3     | MafK      | MAFK    | 0.35298   | 6  |
| V\$ATF4_Q6     | ATF-4     | ATF4    | 0.0582351 | 6  |
| V\$OC2_Q3      | OC-2      | ONECUT2 | 0.0804045 | 6  |
| V\$CEBPB_02    | C/EBPbeta | CEBPB   | 0.453468  | 5  |
| V\$ELK1_01     | Elk-1     | ELK1    | 0.196143  | 5  |
| V\$TCF4_01     | TCF-4     | TCF7L2  | 0.231605  | 4  |

hsa-mir-370

| Matrix_id      | transcription factor | Gene     | PCC        | Occurrence |
|----------------|----------------------|----------|------------|------------|
| V\$PUR1_Q4     | PUR1                 | PURA     | 0.156473   | 34         |
| V\$MAFB_01     | MAFB                 | MAFB     | 0.0712211  | 33         |
| V\$PARP_Q4     | PARP                 | PARP1    | 0.295115   | 32         |
| V\$TBP_Q6      | TBP                  | TBP      | 0.10359    | 30         |
| V\$ZIC3_01     | Zic3                 | ZIC3     | 0.00991243 | 30         |
| V\$NR1B2_Q6    | NR1B2                | RARB     | 0.0183904  | 28         |
| V\$YY1_Q6      | YY1                  | YY1      | 0.221147   | 25         |
| V\$MAZ_Q6      | MAZ                  | MAZ      | 0.121773   | 25         |
| V\$SOX9_Q4     | SOX9                 | SOX9     | 0.0549181  | 25         |
| V\$AP4_Q6_02   | AP-4                 | TFAP4    | 0.101997   | 25         |
| V\$GABPA_Q4    | GABP-alpha           | GABPA    | 0.170194   | 24         |
| V\$YY1_Q6_02   | YY1                  | YY1      | 0.221147   | 24         |
| V\$YY1_Q6_03   | YY1                  | YY1      | 0.221147   | 23         |
| V\$HNF4A_Q6_01 | HNF-4alpha           | HNF4A    | 0.136147   | 22         |
| V\$FKLF_Q5     | FKLF                 | KLF11    | 0.0719132  | 21         |
| V\$BEN_01      | BEN                  | GTF2IRD1 | 0.0089106  | 20         |
| V\$ING4_01     | ING4                 | ING4     | 0.267248   | 20         |
| V\$AP2ALPHA_Q6 | AP-2alpha            | TFAP2A   | 0.129315   | 18         |
| V\$AHR_Q5      | AhR                  | AHR      | 0.0957825  | 17         |
| V\$AP2ALPHA_01 | AP-2alpha            | TFAP2A   | 0.129315   | 17         |
| V\$KLF15_Q2    | KLF15                | KLF15    | 0.12742    | 16         |
| V\$MAZ_Q6_01   | MAZ                  | MAZ      | 0.121773   | 16         |

|                |            |          |           |    |
|----------------|------------|----------|-----------|----|
| V\$EGR1_02     | EGR-1      | EGR1     | 0.285039  | 14 |
| V\$SREBP1_Q6   | SREBP-1    | SREBF1   | 0.781713  | 14 |
| V\$HIF1A_Q6    | HIF-1alpha | HIF1A    | 0.593717  | 13 |
| V\$FAC1_01     | FAC1       | BPTF     | 0.0047734 | 13 |
| V\$GABPBETA_Q3 | GABP-beta  | GABPB1   | 0.0692354 | 12 |
| V\$AP2GAMMA_01 | AP-2gamma  | TFAP2C   | 0.0730365 | 10 |
| V\$CP2_01      | CP2        | TFCP2    | 0.432997  | 10 |
| V\$HBP1_Q2     | hbp1       | HBP1     | 0.129361  | 10 |
| V\$YY1_02      | YY1        | YY1      | 0.221147  | 10 |
| V\$BEN_02      | BEN        | GTF2IRD1 | 0.0089106 | 9  |
| V\$EAR2_Q2     | EAR2       | NR2F6    | 0.165698  | 8  |
| V\$RNF96_01    | RNF96      | TRIM28   | 0.0163921 | 8  |
| V\$MAX_01      | Max        | MAX      | 0.320721  | 6  |
| V\$YY1_03      | YY1        | YY1      | 0.221147  | 6  |
| V\$NMYC_01     | N-Myc      | MYCN     | 0.0416571 | 6  |
| V\$OC2_Q3      | OC-2       | ONECUT2  | 0.115398  | 6  |
| V\$USF2_Q6     | USF2       | USF2     | 0.217458  | 6  |
| V\$CMYC_02     | c-Myc      | MYC      | 0.070049  | 6  |
| V\$CMYC_01     | c-Myc      | MYC      | 0.070049  | 5  |
| V\$MAX_Q6      | MAX        | MAX      | 0.320721  | 5  |
| V\$E2F1_Q4     | E2F-1      | E2F1     | 0.231783  | 4  |
| V\$ELK1_01     | Elk-1      | ELK1     | 0.298056  | 4  |
| V\$ZID_01      | ZID        | ZBTB6    | 0.182808  | 2  |

hsa-mir-371a

| Matrix_id      | transcription factor | Gene  | PCC       | Occurrence |
|----------------|----------------------|-------|-----------|------------|
| V\$PUR1_Q4     | PUR1                 | PURA  | 0.16005   | 263        |
| V\$PEA3_Q6     | PEA3                 | ETV4  | 0.0983111 | 257        |
| V\$PARP_Q4     | PARP                 | PARP1 | 0.0995149 | 254        |
| V\$ELF1_Q6     | Elf-1                | ELF1  | 0.165773  | 249        |
| V\$GKLF_Q4     | GKLF                 | KLF4  | 0.567492  | 246        |
| V\$MAFB_01     | MAFB                 | MAFB  | 0.300398  | 241        |
| V\$P300_01     | p300                 | EP300 | 0.349573  | 236        |
| V\$ETS1_B      | c-Ets-1              | ETS1  | 0.0679363 | 230        |
| V\$CETS1_Q6    | C-ets-1              | ETS1  | 0.0679363 | 224        |
| V\$SMAD4_Q6_01 | Smad4                | SMAD4 | 0.308843  | 223        |
| V\$GATA1_01    | GATA-1               | GATA1 | 0.0170848 | 213        |
| V\$GABPA_Q4    | GABP-alpha           | GABPA | 0.364776  | 212        |
| V\$TBP_Q6      | TBP                  | TBP   | 0.156746  | 202        |
| V\$YY1_01      | YY1                  | YY1   | 0.367543  | 197        |
| V\$DLX5_01     | dlx5                 | DLX5  | 0.691609  | 178        |
| V\$GATA1_02    | GATA-1               | GATA1 | 0.0170848 | 173        |



|                |            |        |           |     |
|----------------|------------|--------|-----------|-----|
| V\$GATA1_06    | GATA-1     | GATA1  | 0.0170848 | 165 |
| V\$GATA2_02    | GATA-2     | GATA2  | 0.695429  | 165 |
| V\$GATA1_05    | GATA-1     | GATA1  | 0.0170848 | 165 |
| V\$ING4_01     | ING4       | ING4   | 0.116608  | 160 |
| V\$PARP_Q3     | PARP       | PARP1  | 0.0995149 | 159 |
| V\$AP2ALPHA_01 | AP-2alpha  | TFAP2A | 0.959118  | 143 |
| V\$GATA3_02    | GATA-3     | GATA3  | 0.912183  | 141 |
| V\$GATA3_01    | GATA-3     | GATA3  | 0.912183  | 139 |
| V\$YY1_Q6_03   | YY1        | YY1    | 0.367543  | 132 |
| V\$GATA2_01    | GATA-2     | GATA2  | 0.695429  | 126 |
| V\$TCF4_01     | TCF-4      | TCF7L2 | 0.46753   | 118 |
| V\$CEBPA_Q6    | C/EBPalpha | CEBPA  | 0.0713893 | 117 |
| V\$PITX2_Q2    | Pitx2      | PITX2  | 0.430072  | 111 |
| V\$FOXJ2_01    | FOXJ2      | FOXJ2  | 0.0461565 | 106 |
| V\$PITX2_01    | PITX2      | PITX2  | 0.430072  | 105 |
| V\$AP2GAMMA_01 | AP-2gamma  | TFAP2C | 0.872738  | 104 |
| V\$ZABC1_01    | ZABC1      | ZNF217 | 0.865372  | 103 |
| V\$CEBPD_Q6    | C/EBPdelta | CEBPD  | 0.438292  | 98  |
| V\$HBP1_Q2     | hbp1       | HBP1   | 0.668623  | 90  |
| V\$FAC1_01     | FAC1       | BPTF   | 0.0676199 | 90  |
| V\$CEBPB_02    | C/EBPbeta  | CEBPB  | 0.597165  | 88  |
| V\$GATA2_03    | GATA-2     | GATA2  | 0.695429  | 77  |
| V\$FOXO4_02    | FOXO4      | FOXO4  | 0.956047  | 75  |
| V\$E2F4_Q6     | E2F-4      | E2F4   | 0.0663263 | 65  |
| V\$CIZ_01      | CIZ        | ZNF384 | 0.0830076 | 56  |
| V\$STAT1_05    | STAT1      | STAT1  | 0.0593173 | 49  |
| V\$IRF2_01     | IRF-2      | IRF2   | 0.072088  | 17  |

hsa-mir-372

| Matrix_id      | transcription factor | Gene  | PCC       | Occurrence |
|----------------|----------------------|-------|-----------|------------|
| V\$PUR1_Q4     | PUR1                 | PURA  | 0.151521  | 265        |
| V\$PEA3_Q6     | PEA3                 | ETV4  | 0.102889  | 259        |
| V\$PARP_Q4     | PARP                 | PARP1 | 0.1081    | 256        |
| V\$ELF1_Q6     | Elf-1                | ELF1  | 0.160558  | 251        |
| V\$GKLF_Q4     | GKLF                 | KLF4  | 0.574165  | 247        |
| V\$MAFB_01     | MAFB                 | MAFB  | 0.289796  | 242        |
| V\$P300_01     | p300                 | EP300 | 0.352733  | 237        |
| V\$ETS1_B      | c-Ets-1              | ETS1  | 0.0751595 | 232        |
| V\$CETS1_Q6    | C-ets-1              | ETS1  | 0.0751595 | 226        |
| V\$SMAD4_Q6_01 | Smad4                | SMAD4 | 0.308667  | 225        |
| V\$GATA1_01    | GATA-1               | GATA1 | 0.0240919 | 214        |
| V\$GABPA_Q4    | GABP-alpha           | GABPA | 0.366507  | 214        |

|                |            |        |           |     |
|----------------|------------|--------|-----------|-----|
| V\$TBP_Q6      | TBP        | TBP    | 0.19111   | 205 |
| V\$YY1_01      | YY1        | YY1    | 0.37484   | 199 |
| V\$DLX5_01     | dlx5       | DLX5   | 0.705134  | 180 |
| V\$GATA1_02    | GATA-1     | GATA1  | 0.0240919 | 176 |
| V\$GATA1_06    | GATA-1     | GATA1  | 0.0240919 | 168 |
| V\$GATA2_02    | GATA-2     | GATA2  | 0.692862  | 168 |
| V\$GATA1_05    | GATA-1     | GATA1  | 0.0240919 | 168 |
| V\$ING4_01     | ING4       | ING4   | 0.121     | 160 |
| V\$PARP_Q3     | PARP       | PARP1  | 0.1081    | 159 |
| V\$AP2ALPHA_01 | AP-2alpha  | TFAP2A | 0.958228  | 144 |
| V\$GATA3_02    | GATA-3     | GATA3  | 0.909859  | 144 |
| V\$GATA3_01    | GATA-3     | GATA3  | 0.909859  | 139 |
| V\$YY1_Q6_03   | YY1        | YY1    | 0.37484   | 133 |
| V\$GATA2_01    | GATA-2     | GATA2  | 0.692862  | 126 |
| V\$TCF4_01     | TCF-4      | TCF7L2 | 0.470797  | 120 |
| V\$CEBPA_Q6    | C/EBPalpha | CEBPA  | 0.0679616 | 117 |
| V\$PITX2_Q2    | Pitx2      | PITX2  | 0.42604   | 111 |
| V\$FOXJ2_01    | FOXJ2      | FOXJ2  | 0.0577009 | 107 |
| V\$AP2GAMMA_01 | AP-2gamma  | TFAP2C | 0.87051   | 105 |
| V\$PITX2_01    | PITX2      | PITX2  | 0.42604   | 104 |
| V\$ZABC1_01    | ZABC1      | ZNF217 | 0.872271  | 103 |
| V\$CEBPD_Q6    | C/EBPdelta | CEBPD  | 0.428503  | 98  |
| V\$HBP1_Q2     | hbp1       | HBP1   | 0.662874  | 90  |
| V\$FAC1_01     | FAC1       | BPTF   | 0.066566  | 90  |
| V\$CEBPB_02    | C/EBPbeta  | CEBPB  | 0.589416  | 88  |
| V\$GATA2_03    | GATA-2     | GATA2  | 0.692862  | 78  |
| V\$FOXO4_02    | FOXO4      | FOXO4  | 0.957266  | 77  |
| V\$E2F4_Q6     | E2F-4      | E2F4   | 0.0760092 | 65  |
| V\$CIZ_01      | CIZ        | ZNF384 | 0.088232  | 56  |
| V\$STAT1_05    | STAT1      | STAT1  | 0.0495436 | 50  |
| V\$IRF2_01     | IRF-2      | IRF2   | 0.0618566 | 17  |

hsa-mir-373

| Matrix_id  | transcription factor | Gene  | PCC       | Occurrence |
|------------|----------------------|-------|-----------|------------|
| V\$PUR1_Q4 | PUR1                 | PURA  | 0.145456  | 266        |
| V\$PEA3_Q6 | PEA3                 | ETV4  | 0.105956  | 260        |
| V\$PARP_Q4 | PARP                 | PARP1 | 0.113937  | 257        |
| V\$ELF1_Q6 | Elf-1                | ELF1  | 0.156781  | 252        |
| V\$GKLF_Q4 | GKLF                 | KLF4  | 0.5782    | 248        |
| V\$MAFB_01 | MAFB                 | MAFB  | 0.282154  | 243        |
| V\$P300_01 | p300                 | EP300 | 0.354561  | 238        |
| V\$ETS1_B  | c-Ets-1              | ETS1  | 0.0800871 | 233        |

|                |            |        |            |     |
|----------------|------------|--------|------------|-----|
| V\$CETS1_Q6    | C-ets-1    | ETS1   | 0.0800871  | 228 |
| V\$SMAD4_Q6_01 | Smad4      | SMAD4  | 0.308229   | 226 |
| V\$GABPA_Q4    | GABP-alpha | GABPA  | 0.36733    | 216 |
| V\$GATA1_01    | GATA-1     | GATA1  | 0.0289222  | 216 |
| V\$TBP_Q6      | TBP        | TBP    | 0.214725   | 206 |
| V\$YY1_01      | YY1        | YY1    | 0.379512   | 199 |
| V\$DLX5_01     | dlx5       | DLX5   | 0.713783   | 182 |
| V\$GATA1_02    | GATA-1     | GATA1  | 0.0289222  | 177 |
| V\$GATA1_05    | GATA-1     | GATA1  | 0.0289222  | 168 |
| V\$GATA2_02    | GATA-2     | GATA2  | 0.690373   | 168 |
| V\$GATA1_06    | GATA-1     | GATA1  | 0.0289222  | 168 |
| V\$ING4_01     | ING4       | ING4   | 0.12392    | 160 |
| V\$PARP_Q3     | PARP       | PARP1  | 0.113937   | 159 |
| V\$GATA3_02    | GATA-3     | GATA3  | 0.907316   | 144 |
| V\$AP2ALPHA_01 | AP-2alpha  | TFAP2A | 0.95663    | 143 |
| V\$GATA3_01    | GATA-3     | GATA3  | 0.907316   | 139 |
| V\$YY1_Q6_03   | YY1        | YY1    | 0.379512   | 134 |
| V\$GATA2_01    | GATA-2     | GATA2  | 0.690373   | 126 |
| V\$TCF4_01     | TCF-4      | TCF7L2 | 0.472578   | 121 |
| V\$CEBPA_Q6    | C/EBPalpha | CEBPA  | 0.0655171  | 119 |
| V\$PITX2_Q2    | Pitx2      | PITX2  | 0.422809   | 112 |
| V\$FOXJ2_01    | FOXJ2      | FOXJ2  | 0.0656405  | 109 |
| V\$PITX2_01    | PITX2      | PITX2  | 0.422809   | 105 |
| V\$ZABC1_01    | ZABC1      | ZNF217 | 0.876158   | 104 |
| V\$AP2GAMMA_01 | AP-2gamma  | TFAP2C | 0.868073   | 104 |
| V\$CEBPD_Q6    | C/EBPdelta | CEBPD  | 0.421282   | 99  |
| V\$HBP1_Q2     | hbp1       | HBP1   | 0.658212   | 90  |
| V\$FAC1_01     | FAC1       | BPTF   | 0.0657675  | 90  |
| V\$CEBPB_02    | C/EBPbeta  | CEBPB  | 0.583443   | 88  |
| V\$GATA2_03    | GATA-2     | GATA2  | 0.690373   | 78  |
| V\$FOXO4_02    | FOXO4      | FOXO4  | 0.957129   | 77  |
| V\$E2F4_Q6     | E2F-4      | E2F4   | 0.0826402  | 65  |
| V\$CIZ_01      | CIZ        | ZNF384 | 0.0917614  | 57  |
| V\$STAT1_05    | STAT1      | STAT1  | 0.042721   | 50  |
| V\$HSF1_01     | HSF1       | HSF1   | 0.00571941 | 41  |
| V\$IRF2_01     | IRF-2      | IRF2   | 0.0547042  | 16  |

hsa-mir-374a

| Matrix_id   | transcription factor | Gene  | PCC       | Occurrence |
|-------------|----------------------|-------|-----------|------------|
| V\$P300_01  | p300                 | EP300 | 0.191083  | 3          |
| V\$FKLF_Q5  | FKLF                 | KLF11 | 0.266174  | 3          |
| V\$HOXD9_Q2 | Hoxd9                | HOXD9 | 0.0526632 | 3          |

|                |            |        |            |   |
|----------------|------------|--------|------------|---|
| V\$PUR1_Q4     | PUR1       | PURA   | 0.209241   | 3 |
| V\$PEA3_Q6     | PEA3       | ETV4   | 0.014765   | 3 |
| V\$LRF_Q2      | LRF        | ZBTB7A | 0.0340343  | 3 |
| V\$NR1B2_Q6    | NR1B2      | RARB   | 0.0350857  | 3 |
| V\$ELF1_Q6     | Elf-1      | ELF1   | 0.0172285  | 3 |
| V\$AML1_Q6     | AML1       | RUNX1  | 0.063576   | 3 |
| V\$YY1_Q6      | YY1        | YY1    | 0.268362   | 3 |
| V\$GR_01       | GR         | NR3C1  | 0.133719   | 3 |
| V\$TBP_Q6      | TBP        | TBP    | 0.124574   | 3 |
| V\$YY1_Q6_02   | YY1        | YY1    | 0.268362   | 3 |
| V\$DLX5_01     | dlx5       | DLX5   | 0.35641    | 3 |
| V\$FOXO3A_Q1   | FOXO3A     | FOXO3  | 0.235827   | 3 |
| V\$PBX1_04     | Pbx1       | PBX1   | 0.111876   | 3 |
| V\$HOXA9_01    | hoxa9      | HOXA9  | 0.213993   | 3 |
| V\$GATA6_01    | GATA-6     | GATA6  | 0.300894   | 3 |
| V\$CEBPE_Q6    | CEBPE      | CEBPE  | 0.113438   | 3 |
| V\$HNF3A_01    | HNF3A      | FOXA1  | 0.11592    | 3 |
| V\$GATA1_01    | GATA-1     | GATA1  | 0.00766157 | 3 |
| V\$GATA2_01    | GATA-2     | GATA2  | 0.635676   | 3 |
| V\$GATA3_01    | GATA-3     | GATA3  | 0.625838   | 3 |
| V\$PARP_Q4     | PARP       | PARP1  | 0.0122904  | 3 |
| V\$HNF4A_Q6_01 | HNF-4alpha | HNF4A  | 0.0425484  | 3 |
| V\$GATA1_02    | GATA-1     | GATA1  | 0.00766157 | 3 |
| V\$GR_Q6       | GR         | NR3C1  | 0.133719   | 3 |
| V\$AML1_01     | AML1a      | RUNX1  | 0.063576   | 3 |
| V\$GATA1_05    | GATA-1     | GATA1  | 0.00766157 | 3 |
| V\$GATA1_06    | GATA-1     | GATA1  | 0.00766157 | 3 |
| V\$GATA2_02    | GATA-2     | GATA2  | 0.635676   | 3 |
| V\$GATA3_02    | GATA-3     | GATA3  | 0.625838   | 3 |
| V\$SMAD4_Q6_01 | Smad4      | SMAD4  | 0.143939   | 3 |
| V\$CEBPB_Q6    | C/EBPbeta  | CEBPB  | 0.583063   | 2 |
| V\$SPI1_03     | SPI1       | SPI1   | 0.224579   | 2 |
| V\$PBX1_Q3     | Pbx1       | PBX1   | 0.111876   | 2 |
| V\$AML1_Q4     | AML1       | RUNX1  | 0.063576   | 2 |
| V\$TCF4_01     | TCF-4      | TCF7L2 | 0.403973   | 2 |
| V\$CEBPG_Q6_01 | C/EBPgamma | CEBPG  | 0.369886   | 2 |
| V\$FOXO4_02    | FOXO4      | FOXO4  | 0.620096   | 2 |
| V\$FOXJ2_01    | FOXJ2      | FOXJ2  | 0.105962   | 2 |
| V\$MSX1_01     | Msx-1      | MSX1   | 0.0188117  | 2 |
| V\$CEBPD_Q6    | C/EBPdelta | CEBPD  | 0.605923   | 2 |
| V\$CEBPG_Q6    | C/EBPgamma | CEBPG  | 0.369886   | 2 |
| V\$CIZ_01      | CIZ        | ZNF384 | 0.217114   | 2 |
| V\$TCF4_Q5     | TCF-4      | TCF7L2 | 0.403973   | 2 |
| V\$ETS2_B      | c-Ets-2    | ETS2   | 0.172148   | 2 |
| V\$CEBPB_02    | C/EBPbeta  | CEBPB  | 0.583063   | 2 |
| V\$CEBPB_01    | C/EBPbeta  | CEBPB  | 0.583063   | 2 |

|               |       |        |           |   |
|---------------|-------|--------|-----------|---|
| V\$YY1_02     | YY1   | YY1    | 0.268362  | 2 |
| V\$PARP_Q3    | PARP  | PARP1  | 0.0122904 | 2 |
| V\$YY1_01     | YY1   | YY1    | 0.268362  | 2 |
| V\$MAFB_01    | MAFB  | MAFB   | 0.274122  | 2 |
| V\$MEIS1_01   | MEIS1 | MEIS1  | 0.0908269 | 2 |
| V\$TCF4_Q5_01 | TCF-4 | TCF7L2 | 0.403973  | 1 |
| V\$YY1_03     | YY1   | YY1    | 0.268362  | 1 |
| V\$YY1_Q6_03  | YY1   | YY1    | 0.268362  | 1 |
| V\$FOXO4_01   | FOXO4 | FOXO4  | 0.620096  | 1 |
| V\$CDP_04     | CDP   | CUX1   | 0.549101  | 1 |
| V\$CTCF_01    | CTCF  | CTCF   | 0.270208  | 1 |
| V\$CART1_02   | CART1 | ALX1   | 0.0266726 | 1 |
| V\$HOXA7_01   | HOXA7 | HOXA7  | 0.127121  | 1 |
| V\$LHX3_01    | Lhx3  | LHX3   | 0.012182  | 1 |
| V\$STAT3_03   | STAT3 | STAT3  | 0.363652  | 1 |
| V\$GLI3_Q5_01 | GLI3  | GLI3   | 0.133621  | 1 |
| V\$CTCF_02    | CTCF  | CTCF   | 0.270208  | 1 |
| V\$HBP1_Q2    | hbp1  | HBP1   | 0.421938  | 1 |

hsa-mir-375

| Matrix_id     | transcription factor | Gene  | PCC        | Occurrence |
|---------------|----------------------|-------|------------|------------|
| V\$SOX9_Q4    | SOX9                 | SOX9  | 0.13851    | 39         |
| V\$PITX3_Q2   | PITX3                | PITX3 | 0.105937   | 31         |
| V\$SOX9_B1    | SOX9                 | SOX9  | 0.13851    | 30         |
| V\$MEIS1_01   | MEIS1                | MEIS1 | 0.00421567 | 15         |
| V\$ESE1_Q3    | ESE-1                | ELF3  | 0.285638   | 9          |
| V\$EHF_03     | EHF                  | EHF   | 0.0226993  | 6          |
| V\$CMYC_02    | c-Myc                | MYC   | 0.344965   | 5          |
| V\$ESE1_02    | ESE-1                | ELF3  | 0.285638   | 5          |
| V\$ATF6_01    | ATF6                 | ATF6  | 0.0621595  | 4          |
| V\$ATF3_Q6_01 | ATF-3                | ATF3  | 0.0892773  | 4          |
| V\$ATF4_Q6    | ATF-4                | ATF4  | 0.0404105  | 4          |

hsa-mir-376a-1

| Matrix_id  | transcription factor | Gene  | PCC       | Occurrence |
|------------|----------------------|-------|-----------|------------|
| V\$PUR1_Q4 | PUR1                 | PURA  | 0.142977  | 193        |
| V\$PEA3_Q6 | PEA3                 | ETV4  | 0.0926303 | 190        |
| V\$PARP_Q4 | PARP                 | PARP1 | 0.113077  | 187        |

|                |            |        |           |     |
|----------------|------------|--------|-----------|-----|
| V\$ELF1_Q6     | Elf-1      | ELF1   | 0.0878452 | 186 |
| V\$GKLF_Q4     | GKLF       | KLF4   | 0.481631  | 181 |
| V\$MAFB_01     | MAFB       | MAFB   | 0.211231  | 177 |
| V\$P300_01     | p300       | EP300  | 0.278437  | 172 |
| V\$SMAD4_Q6_01 | Smad4      | SMAD4  | 0.210455  | 167 |
| V\$GABPA_Q4    | GABP-alpha | GABPA  | 0.337713  | 159 |
| V\$GR_Q6       | GR         | NR3C1  | 0.0794084 | 146 |
| V\$YY1_01      | YY1        | YY1    | 0.366792  | 143 |
| V\$YY1_Q6_02   | YY1        | YY1    | 0.366792  | 133 |
| V\$YY1_Q6      | YY1        | YY1    | 0.366792  | 133 |
| V\$AHR_Q5      | AhR        | AHR    | 0.853696  | 122 |
| V\$ERBETA_Q5   | ER-beta    | ESR2   | 0.0112268 | 118 |
| V\$AP2ALPHA_Q6 | AP-2alpha  | TFAP2A | 0.863612  | 118 |
| V\$ING4_01     | ING4       | ING4   | 0.0746429 | 114 |
| V\$GATA3_01    | GATA-3     | GATA3  | 0.81847   | 107 |
| V\$PBX1_04     | Pbx1       | PBX1   | 0.0199438 | 103 |
| V\$GATA2_01    | GATA-2     | GATA2  | 0.590198  | 96  |
| V\$GR_01       | GR         | NR3C1  | 0.0794084 | 89  |
| V\$TCF4_01     | TCF-4      | TCF7L2 | 0.373772  | 81  |
| V\$CREM_Q6     | CREM       | CREM   | 0.374112  | 74  |
| V\$GABPBETA_Q3 | GABP-beta  | GABPB1 | 0.214315  | 71  |
| V\$CEBPB_02    | C/EBPbeta  | CEBPB  | 0.539998  | 61  |
| V\$YY1_02      | YY1        | YY1    | 0.366792  | 59  |
| V\$ATF3_Q6_01  | ATF-3      | ATF3   | 0.474903  | 54  |
| V\$ELK1_01     | Elk-1      | ELK1   | 0.11574   | 45  |
| V\$ATF4_Q6     | ATF-4      | ATF4   | 0.0610456 | 40  |
| V\$SMAD4_Q6    | SMAD4      | SMAD4  | 0.210455  | 34  |
| V\$MAFK_Q3     | MafK       | MAFK   | 0.314305  | 22  |

hsa-mir-376a-2

| Matrix_id      | transcription factor | Gene  | PCC       | Occurrence |
|----------------|----------------------|-------|-----------|------------|
| V\$PUR1_Q4     | PUR1                 | PURA  | 0.142977  | 193        |
| V\$PEA3_Q6     | PEA3                 | ETV4  | 0.0926303 | 190        |
| V\$PARP_Q4     | PARP                 | PARP1 | 0.113077  | 187        |
| V\$ELF1_Q6     | Elf-1                | ELF1  | 0.0878452 | 186        |
| V\$GKLF_Q4     | GKLF                 | KLF4  | 0.481631  | 181        |
| V\$MAFB_01     | MAFB                 | MAFB  | 0.211231  | 177        |
| V\$P300_01     | p300                 | EP300 | 0.278437  | 172        |
| V\$SMAD4_Q6_01 | Smad4                | SMAD4 | 0.210455  | 167        |
| V\$GABPA_Q4    | GABP-alpha           | GABPA | 0.337713  | 159        |
| V\$GR_Q6       | GR                   | NR3C1 | 0.0794084 | 146        |
| V\$YY1_01      | YY1                  | YY1   | 0.366792  | 143        |

|                |           |        |           |     |
|----------------|-----------|--------|-----------|-----|
| V\$YY1_Q6_02   | YY1       | YY1    | 0.366792  | 133 |
| V\$YY1_Q6      | YY1       | YY1    | 0.366792  | 133 |
| V\$AHR_Q5      | AhR       | AHR    | 0.853696  | 122 |
| V\$ERBETA_Q5   | ER-beta   | ESR2   | 0.0112268 | 118 |
| V\$AP2ALPHA_Q6 | AP-2alpha | TFAP2A | 0.863612  | 118 |
| V\$ING4_01     | ING4      | ING4   | 0.0746429 | 114 |
| V\$GATA3_01    | GATA-3    | GATA3  | 0.81847   | 107 |
| V\$PBX1_04     | Pbx1      | PBX1   | 0.0199438 | 103 |
| V\$GATA2_01    | GATA-2    | GATA2  | 0.590198  | 96  |
| V\$GR_01       | GR        | NR3C1  | 0.0794084 | 89  |
| V\$TCF4_01     | TCF-4     | TCF7L2 | 0.373772  | 81  |
| V\$CREM_Q6     | CREM      | CREM   | 0.374112  | 74  |
| V\$GABPBETA_Q3 | GABP-beta | GABPB1 | 0.214315  | 71  |
| V\$CEBPB_02    | C/EBPbeta | CEBPB  | 0.539998  | 61  |
| V\$YY1_02      | YY1       | YY1    | 0.366792  | 59  |
| V\$ATF3_Q6_01  | ATF-3     | ATF3   | 0.474903  | 54  |
| V\$ELK1_01     | Elk-1     | ELK1   | 0.11574   | 45  |
| V\$ATF4_Q6     | ATF-4     | ATF4   | 0.0610456 | 40  |
| V\$SMAD4_Q6    | SMAD4     | SMAD4  | 0.210455  | 34  |
| V\$MAFK_Q3     | MafK      | MAFK   | 0.314305  | 22  |

hsa-mir-377

| Matrix_id      | transcription factor | Gene  | PCC       | Occurrence |
|----------------|----------------------|-------|-----------|------------|
| V\$PUR1_Q4     | PUR1                 | PURA  | 0.16005   | 263        |
| V\$PEA3_Q6     | PEA3                 | ETV4  | 0.0983111 | 257        |
| V\$PARP_Q4     | PARP                 | PARP1 | 0.0995149 | 254        |
| V\$ELF1_Q6     | Elf-1                | ELF1  | 0.165773  | 249        |
| V\$GKLF_Q4     | GKLF                 | KLF4  | 0.567492  | 246        |
| V\$MAFB_01     | MAFB                 | MAFB  | 0.300398  | 241        |
| V\$P300_01     | p300                 | EP300 | 0.349573  | 236        |
| V\$ETS1_B      | c-Ets-1              | ETS1  | 0.0679363 | 230        |
| V\$CETS1_Q6    | C-ets-1              | ETS1  | 0.0679363 | 224        |
| V\$SMAD4_Q6_01 | Smad4                | SMAD4 | 0.308843  | 223        |
| V\$GATA1_01    | GATA-1               | GATA1 | 0.0170848 | 213        |
| V\$GABPA_Q4    | GABP-alpha           | GABPA | 0.364776  | 212        |
| V\$GR_Q6       | GR                   | NR3C1 | 0.157584  | 201        |
| V\$TBX5_02     | TBX5                 | TBX5  | 0.0788559 | 200        |
| V\$YY1_01      | YY1                  | YY1   | 0.367543  | 197        |
| V\$YY1_Q6_02   | YY1                  | YY1   | 0.367543  | 176        |
| V\$YY1_Q6      | YY1                  | YY1   | 0.367543  | 176        |
| V\$GATA1_02    | GATA-1               | GATA1 | 0.0170848 | 173        |
| V\$AHR_Q5      | AhR                  | AHR   | 0.965365  | 168        |

|                |           |        |           |     |
|----------------|-----------|--------|-----------|-----|
| V\$ERBETA_Q5   | ER-beta   | ESR2   | 0.0421464 | 160 |
| V\$ING4_01     | ING4      | ING4   | 0.116608  | 160 |
| V\$AP2ALPHA_Q6 | AP-2alpha | TFAP2A | 0.959118  | 153 |
| V\$GATA1_04    | GATA-1    | GATA1  | 0.0170848 | 148 |
| V\$GATA3_01    | GATA-3    | GATA3  | 0.912183  | 139 |
| V\$GATA2_01    | GATA-2    | GATA2  | 0.695429  | 126 |
| V\$CMAF_01     | c-Maf     | MAF    | 0.0948992 | 124 |
| V\$GR_01       | GR        | NR3C1  | 0.157584  | 119 |
| V\$TCF4_01     | TCF-4     | TCF7L2 | 0.46753   | 118 |
| V\$CREM_Q6     | CREM      | CREM   | 0.172813  | 98  |
| V\$GABPBETA_Q3 | GABP-beta | GABPB1 | 0.228391  | 96  |
| V\$CEBPB_02    | C/EBPbeta | CEBPB  | 0.597165  | 88  |
| V\$YY1_02      | YY1       | YY1    | 0.367543  | 74  |
| V\$ATF1_Q6_01  | ATF-1     | ATF1   | 0.0627481 | 70  |
| V\$ATF3_Q6_01  | ATF-3     | ATF3   | 0.62919   | 68  |
| V\$ELK1_01     | Elk-1     | ELK1   | 0.0202257 | 63  |
| V\$ATF4_Q6     | ATF-4     | ATF4   | 0.0658991 | 52  |
| V\$SMAD4_Q6    | SMAD4     | SMAD4  | 0.308843  | 46  |
| V\$MAFK_Q3     | MafK      | MAFK   | 0.278197  | 29  |

hsa-mir-378a

| Matrix_id      | transcription factor | Gene   | PCC      | Occurrence |
|----------------|----------------------|--------|----------|------------|
| V\$PUR1_Q4     | PUR1                 | PURA   | 0.308515 | 1920       |
| V\$IK_Q5       | Ikaros               | IKZF1  | 0.714059 | 1888       |
| V\$PARP_Q4     | PARP                 | PARP1  | 0.553053 | 1841       |
| V\$PEA3_Q6     | PEA3                 | ETV4   | 0.714305 | 1822       |
| V\$AP2REP_01   | AP-2rep              | KLF12  | 0.875255 | 1817       |
| V\$P300_01     | p300                 | EP300  | 0.713635 | 1776       |
| V\$ZIC3_01     | Zic3                 | ZIC3   | 0.427406 | 1664       |
| V\$SMAD4_Q6_01 | Smad4                | SMAD4  | 0.690403 | 1640       |
| V\$MYB_Q6      | c-Myb                | MYB    | 0.265206 | 1628       |
| V\$CMYB_Q5     | c-Myb                | MYB    | 0.265206 | 1628       |
| V\$TBP_Q6      | TBP                  | TBP    | 0.280582 | 1588       |
| V\$CDX2_Q5_02  | CDX-2                | CDX2   | 0.823254 | 1588       |
| V\$CETS1_Q6    | C-ets-1              | ETS1   | 0.668178 | 1555       |
| V\$NR1B2_Q6    | NR1B2                | RARB   | 0.808739 | 1555       |
| V\$NFAT4_Q3    | NF-AT4               | NFATC3 | 0.493358 | 1549       |
| V\$GATA1_01    | GATA-1               | GATA1  | 0.728682 | 1546       |
| V\$TTF1_Q5     | TTF-1                | NKX2-1 | 0.266805 | 1542       |
| V\$ETS1_B      | c-Ets-1              | ETS1   | 0.668178 | 1538       |
| V\$ETS2_Q6     | c-Ets-2              | ETS2   | 0.590406 | 1516       |
| V\$GABPA_Q4    | GABP-alpha           | GABPA  | 0.378707 | 1478       |



|                |            |          |           |      |
|----------------|------------|----------|-----------|------|
| V\$YY1_01      | YY1        | YY1      | 0.250643  | 1471 |
| V\$SMAD3_Q6_01 | Smad3      | SMAD3    | 0.758721  | 1468 |
| V\$MEF2C_Q4    | MEF-2C     | MEF2C    | 0.350492  | 1457 |
| V\$Elf5_03     | ELF5       | ELF5     | 0.179456  | 1443 |
| V\$DLX5_01     | dlx5       | DLX5     | 0.070861  | 1424 |
| V\$NANOG_02    | Nanog      | NANOG    | 0.846331  | 1414 |
| V\$IPF1_01     | IPF1       | PDX1     | 0.916747  | 1377 |
| V\$SPI1_03     | SPI1       | SPI1     | 0.269746  | 1366 |
| V\$HNF4A_Q6_01 | HNF-4alpha | HNF4A    | 0.360839  | 1359 |
| V\$YY1_Q6      | YY1        | YY1      | 0.250643  | 1357 |
| V\$AP4_Q6_02   | AP-4       | TFAP4    | 0.567156  | 1336 |
| V\$ETS2_B      | c-Ets-2    | ETS2     | 0.590406  | 1330 |
| V\$GATA1_02    | GATA-1     | GATA1    | 0.728682  | 1325 |
| V\$SPI1_Q5     | SPI1       | SPI1     | 0.269746  | 1298 |
| V\$YY1_Q6_02   | YY1        | YY1      | 0.250643  | 1289 |
| V\$GATA2_02    | GATA-2     | GATA2    | 0.350323  | 1285 |
| V\$GATA1_05    | GATA-1     | GATA1    | 0.728682  | 1285 |
| V\$GATA6_01    | GATA-6     | GATA6    | 0.086201  | 1285 |
| V\$GATA1_06    | GATA-1     | GATA1    | 0.728682  | 1285 |
| V\$BEN_01      | BEN        | GTF2IRD1 | 0.875679  | 1245 |
| V\$LRF_Q2      | LRF        | ZBTB7A   | 0.894405  | 1176 |
| V\$PARP_Q3     | PARP       | PARP1    | 0.553053  | 1168 |
| V\$E2A_Q6      | E2A        | TCF3     | 0.749352  | 1151 |
| V\$E12_Q6      | E12        | TCF3     | 0.749352  | 1150 |
| V\$PITX3_Q2    | PITX3      | PITX3    | 0.606073  | 1147 |
| V\$E47_02      | E47        | TCF3     | 0.749352  | 1144 |
| V\$MYOD_Q6_01  | MyoD       | MYOD1    | 0.782742  | 1142 |
| V\$ING4_01     | ING4       | ING4     | 0.0961257 | 1140 |
| V\$SP1_Q6      | Sp1        | SP1      | 0.870039  | 1122 |
| V\$GATA1_04    | GATA-1     | GATA1    | 0.728682  | 1111 |
| V\$IRF4_Q6     | IRF-4      | IRF4     | 0.873682  | 1110 |
| V\$CRX_Q4      | Crx        | CRX      | 0.756139  | 1055 |
| V\$MYOGENIN_Q6 | myogenin   | MYOG     | 0.745715  | 1044 |
| V\$SP1_Q6_01   | Sp1        | SP1      | 0.870039  | 1008 |
| V\$AP2ALPHA_Q6 | AP-2alpha  | TFAP2A   | 0.123668  | 1002 |
| V\$SP1_01      | Sp1        | SP1      | 0.870039  | 999  |
| V\$SP1_Q4_01   | Sp1        | SP1      | 0.870039  | 982  |
| V\$GFI1_Q6     | Gfi1       | GFI1     | 0.405214  | 970  |
| V\$TCF3_01     | TCF-3      | TCF7L1   | 0.720176  | 968  |
| V\$ARNT_01     | Arnt       | ARNT     | 0.823503  | 956  |
| V\$FOXJ2_01    | FOXJ2      | FOXJ2    | 0.689539  | 954  |
| V\$AP2ALPHA_01 | AP-2alpha  | TFAP2A   | 0.123668  | 953  |
| V\$SP1_Q2_01   | Sp1        | SP1      | 0.870039  | 951  |
| V\$GFI1_Q6_01  | Gfi1       | GFI1     | 0.405214  | 944  |
| V\$PITX2_Q2    | Pitx2      | PITX2    | 0.716547  | 942  |
| V\$AP4_Q5      | AP-4       | TFAP4    | 0.567156  | 930  |

|                   |           |         |            |     |
|-------------------|-----------|---------|------------|-----|
| V\$WT1_Q6_01      | WT1       | WT1     | 0.0621345  | 923 |
| V\$E2A_Q2         | E2A       | TCF3    | 0.749352   | 915 |
| V\$SP1_02         | SP1       | SP1     | 0.870039   | 883 |
| V\$CMAF_01        | c-Maf     | MAF     | 0.378985   | 883 |
| V\$RFX1_02        | RFX1      | RFX1    | 0.865122   | 881 |
| V\$PITX2_01       | PITX2     | PITX2   | 0.716547   | 881 |
| V\$PITX1_01       | Pitx1     | PITX1   | 0.844111   | 876 |
| V\$TFII_Q6        | TFII-I    | GTF2I   | 0.704533   | 864 |
| V\$ZFX_01         | Zfx       | ZFX     | 0.796023   | 855 |
| V\$WT1_Q6         | WT1       | WT1     | 0.0621345  | 850 |
| V\$AP4_Q6         | AP-4      | TFAP4   | 0.567156   | 822 |
| V\$CRX_02         | Crx       | CRX     | 0.756139   | 814 |
| V\$GFI1B_01       | Gfi1b     | GFI1B   | 0.92407    | 792 |
| V\$ERR1_Q3        | ERR1      | ESRRA   | 0.888858   | 792 |
| V\$ELF5_01        | ELF5      | ELF5    | 0.179456   | 765 |
| V\$MYOGENIN_Q6_01 | myogenin  | MYOG    | 0.745715   | 750 |
| V\$SMAD3_Q6       | SMAD3     | SMAD3   | 0.758721   | 727 |
| V\$NEUROD_02      | NeuroD    | NEUROD1 | 0.791881   | 708 |
| V\$CP2_01         | CP2       | TFCP2   | 0.111587   | 694 |
| V\$MYOD_Q6        | MyoD      | MYOD1   | 0.782742   | 690 |
| V\$AP2GAMMA_01    | AP-2gamma | TFAP2C  | 0.241683   | 688 |
| V\$GABPBETA_Q3    | GABP-beta | GABPB1  | 0.579386   | 673 |
| V\$AP2BETA_Q3     | AP-2beta  | TFAP2B  | 0.802051   | 668 |
| V\$SP2_01         | SP2       | SP2     | 0.734295   | 662 |
| V\$CNOT3_01       | CNOT3     | CNOT3   | 0.777575   | 642 |
| V\$PAX8_01        | Pax-8     | PAX8    | 0.33615    | 634 |
| V\$E2F1_Q3        | E2F-1     | E2F1    | 0.5605     | 622 |
| V\$E2F1_Q3_01     | E2F-1     | E2F1    | 0.5605     | 602 |
| V\$GATA2_03       | GATA-2    | GATA2   | 0.350323   | 601 |
| V\$AP4_Q6_01      | AP-4      | TFAP4   | 0.567156   | 600 |
| V\$MATH1_Q2       | MATH1     | ATOH1   | 0.677245   | 542 |
| V\$NURR1_Q3       | NURR1     | NR4A2   | 0.00494998 | 531 |
| V\$KAISO_01       | KAISO     | ZBTB33  | 0.928694   | 520 |
| V\$RNF96_01       | RNF96     | TRIM28  | 0.0646496  | 514 |
| V\$MYOD_01        | MyoD      | MYOD1   | 0.782742   | 511 |
| V\$TR4_Q2         | TR4       | NR2C2   | 0.875259   | 422 |
| V\$SP4_Q5         | SP4       | SP4     | 0.767834   | 418 |
| V\$SMAD4_Q6       | SMAD4     | SMAD4   | 0.690403   | 310 |
| V\$ZID_01         | ZID       | ZBTB6   | 0.369345   | 244 |
| V\$AMEF2_Q6       | aMEF-2    | MEF2A   | 0.0422741  | 214 |

hsa-mir-379

| Matrix_id | transcription factor | Gene | PCC | Occurrence |
|-----------|----------------------|------|-----|------------|
|-----------|----------------------|------|-----|------------|

|                |            |         |            |    |
|----------------|------------|---------|------------|----|
| V\$MAFB_01     | MAFB       | MAFB    | 0.0728568  | 15 |
| V\$PARP_Q4     | PARP       | PARP1   | 0.23061    | 14 |
| V\$P300_01     | p300       | EP300   | 0.0975698  | 13 |
| V\$PEA3_Q6     | PEA3       | ETV4    | 0.03589    | 13 |
| V\$GATA2_02    | GATA-2     | GATA2   | 0.208269   | 12 |
| V\$YY1_Q6      | YY1        | YY1     | 0.297849   | 12 |
| V\$GATA6_01    | GATA-6     | GATA6   | 0.409645   | 12 |
| V\$SMAD4_Q6_01 | Smad4      | SMAD4   | 0.0176811  | 12 |
| V\$YY1_Q6_02   | YY1        | YY1     | 0.297849   | 12 |
| V\$TBP_Q6      | TBP        | TBP     | 0.17341    | 11 |
| V\$ZIC1_01     | Zic1       | ZIC1    | 0.278131   | 11 |
| V\$GATA3_02    | GATA-3     | GATA3   | 0.368536   | 11 |
| V\$GABPA_Q4    | GABP-alpha | GABPA   | 0.198908   | 10 |
| V\$PITX3_Q2    | PITX3      | PITX3   | 0.2852     | 10 |
| V\$MEF2C_Q4    | MEF-2C     | MEF2C   | 0.230243   | 10 |
| V\$DLX5_01     | dlx5       | DLX5    | 0.524752   | 10 |
| V\$SOX9_Q4     | SOX9       | SOX9    | 0.069732   | 9  |
| V\$PBX1_Q3     | Pbx1       | PBX1    | 0.239657   | 9  |
| V\$YY1_01      | YY1        | YY1     | 0.297849   | 9  |
| V\$PBX1_04     | Pbx1       | PBX1    | 0.239657   | 9  |
| V\$CREM_Q6     | CREM       | CREM    | 0.58617    | 9  |
| V\$ATF3_Q6_01  | ATF-3      | ATF3    | 0.0370153  | 9  |
| V\$SREBP1_Q6   | SREBP-1    | SREBF1  | 0.752608   | 8  |
| V\$SOX9_B1     | SOX9       | SOX9    | 0.069732   | 8  |
| V\$ATF4_Q6     | ATF-4      | ATF4    | 0.0334967  | 7  |
| V\$HIF1A_Q6    | HIF-1alpha | HIF1A   | 0.540741   | 7  |
| V\$PITX2_01    | PITX2      | PITX2   | 0.115951   | 7  |
| V\$PIT1_Q6     | Pit-1      | POU1F1  | 0.105052   | 7  |
| V\$FOXJ2_01    | FOXJ2      | FOXJ2   | 0.187789   | 6  |
| V\$PITX2_Q2    | Pitx2      | PITX2   | 0.115951   | 6  |
| V\$GATA2_03    | GATA-2     | GATA2   | 0.208269   | 6  |
| V\$ING4_01     | ING4       | ING4    | 0.193797   | 6  |
| V\$HBP1_Q2     | hbp1       | HBP1    | 0.309685   | 5  |
| V\$HNF6_Q6     | HNF6       | ONECUT1 | 0.197123   | 5  |
| V\$GLI3_Q5_01  | GLI3       | GLI3    | 0.00788451 | 5  |
| V\$HMGY1_Q1    | HMGY1      | HMGY1   | 0.0831277  | 5  |
| V\$OC2_Q3      | OC-2       | ONECUT2 | 0.0207437  | 5  |
| V\$TCF4_Q5     | TCF-4      | TCF7L2  | 0.138151   | 4  |
| V\$FOXO4_Q2    | FOXO4      | FOXO4   | 0.487934   | 4  |
| V\$SREBP1_Q2   | SREBP-1    | SREBF1  | 0.752608   | 3  |
| V\$FOXJ2_Q2    | FOXJ2      | FOXJ2   | 0.187789   | 3  |
| V\$CART1_Q2    | CART1      | ALX1    | 0.0142576  | 3  |
| V\$HOXA13_Q2   | HOXA5      | HOXA5   | 0.579097   | 3  |
| V\$FOXO4_Q1    | FOXO4      | FOXO4   | 0.487934   | 2  |
| V\$CDP_Q2      | CDP        | CUX1    | 0.0749813  | 2  |

|             |       |        |           |   |
|-------------|-------|--------|-----------|---|
| V\$CDP_04   | CDP   | CUX1   | 0.0749813 | 2 |
| V\$DMRT1_01 | DMRT1 | DMRT1  | 0.0101864 | 1 |
| V\$ZABC1_01 | ZABC1 | ZNF217 | 0.282236  | 1 |

hsa-mir-381

| Matrix_id      | transcription factor | Gene    | PCC        | Occurrence |
|----------------|----------------------|---------|------------|------------|
| V\$MAFB_01     | MAFB                 | MAFB    | 0.193434   | 38         |
| V\$PUR1_Q4     | PUR1                 | PURA    | 0.0668109  | 38         |
| V\$ELF1_Q6     | Elf-1                | ELF1    | 0.0798617  | 37         |
| V\$GKLF_Q4     | GKLF                 | KLF4    | 0.418251   | 36         |
| V\$PARP_Q4     | PARP                 | PARP1   | 0.0965008  | 36         |
| V\$PEA3_Q6     | PEA3                 | ETV4    | 0.111304   | 35         |
| V\$P300_01     | p300                 | EP300   | 0.245057   | 33         |
| V\$SMAD4_Q6_01 | Smad4                | SMAD4   | 0.176696   | 33         |
| V\$GABPA_Q4    | GABP-alpha           | GABPA   | 0.294215   | 30         |
| V\$YY1_01      | YY1                  | YY1     | 0.338613   | 29         |
| V\$GATA3_01    | GATA-3               | GATA3   | 0.702235   | 28         |
| V\$GR_Q6       | GR                   | NR3C1   | 0.0599845  | 27         |
| V\$YY1_Q6_02   | YY1                  | YY1     | 0.338613   | 25         |
| V\$ERBETA_Q5   | ER-beta              | ESR2    | 0.00724766 | 24         |
| V\$YY1_Q6      | YY1                  | YY1     | 0.338613   | 24         |
| V\$AHR_Q5      | AhR                  | AHR     | 0.717636   | 24         |
| V\$GATA2_01    | GATA-2               | GATA2   | 0.485597   | 24         |
| V\$AP2ALPHA_Q6 | AP-2alpha            | TFAP2A  | 0.741788   | 22         |
| V\$CREM_Q6     | CREM                 | CREM    | 0.452336   | 20         |
| V\$CMaf_01     | c-Maf                | MAF     | 0.00640241 | 20         |
| V\$FOXP3_01    | FOXP3                | FOXP3   | 0.0107221  | 19         |
| V\$PBX1_Q4     | Pbx1                 | PBX1    | 0.0851922  | 19         |
| V\$GABPBETA_Q3 | GABP-beta            | GABPB1  | 0.19623    | 19         |
| V\$ATF3_Q6_01  | ATF-3                | ATF3    | 0.398947   | 16         |
| V\$YY1_Q2      | YY1                  | YY1     | 0.338613   | 15         |
| V\$GR_Q1       | GR                   | NR3C1   | 0.0599845  | 15         |
| V\$CEBPB_Q2    | C/EBPbeta            | CEBPB   | 0.525769   | 14         |
| V\$PIT1_Q6     | Pit-1                | POU1F1  | 0.0836381  | 14         |
| V\$ATF4_Q6     | ATF-4                | ATF4    | 0.0646266  | 13         |
| V\$TCF4_Q1     | TCF-4                | TCF7L2  | 0.312118   | 13         |
| V\$OC2_Q3      | OC-2                 | ONECUT2 | 0.0369472  | 13         |
| V\$SMAD4_Q6    | SMAD4                | SMAD4   | 0.176696   | 12         |
| V\$ELK1_Q1     | Elk-1                | ELK1    | 0.163572   | 9          |
| V\$MAFK_Q3     | MafK                 | MAFK    | 0.359209   | 6          |

## hsa-mir-382

| Matrix_id      | transcription factor | Gene     | PCC        | Occurrence |
|----------------|----------------------|----------|------------|------------|
| V\$PUR1_Q4     | PUR1                 | PURA     | 0.0666371  | 44         |
| V\$GKLF_Q4     | GKLF                 | KLF4     | 0.129527   | 42         |
| V\$MAFB_Q1     | MAFB                 | MAFB     | 0.0469591  | 42         |
| V\$PARP_Q4     | PARP                 | PARP1    | 0.164563   | 41         |
| V\$P300_Q1     | p300                 | EP300    | 0.0725838  | 40         |
| V\$PEA3_Q6     | PEA3                 | ETV4     | 0.0482744  | 39         |
| V\$GABPA_Q4    | GABP-alpha           | GABPA    | 0.174264   | 34         |
| V\$NR1B2_Q6    | NR1B2                | RARB     | 0.00810715 | 32         |
| V\$YY1_Q6_Q2   | YY1                  | YY1      | 0.243341   | 31         |
| V\$YY1_Q1      | YY1                  | YY1      | 0.243341   | 31         |
| V\$YY1_Q6      | YY1                  | YY1      | 0.243341   | 31         |
| V\$HNF4A_Q6_Q1 | HNF-4alpha           | HNF4A    | 0.0965072  | 31         |
| V\$GATA3_Q1    | GATA-3               | GATA3    | 0.278887   | 30         |
| V\$BEN_Q1      | BEN                  | GTF2IRD1 | 0.00184701 | 29         |
| V\$GATA2_Q1    | GATA-2               | GATA2    | 0.123279   | 27         |
| V\$AP2ALPHA_Q6 | AP-2alpha            | TFAP2A   | 0.304833   | 26         |
| V\$PBX1_Q4     | Pbx1                 | PBX1     | 0.240835   | 24         |
| V\$AHR_Q5      | AhR                  | AHR      | 0.26536    | 23         |
| V\$ING4_Q1     | ING4                 | ING4     | 0.0522931  | 22         |
| V\$SOX10_Q6    | SOX10                | SOX10    | 0.0553344  | 21         |
| V\$CREM_Q6     | CREM                 | CREM     | 0.582704   | 19         |
| V\$TCF4_Q1     | TCF-4                | TCF7L2   | 0.0594113  | 17         |
| V\$PIT1_Q6     | Pit-1                | POU1F1   | 0.261331   | 17         |
| V\$ATF3_Q6_Q1  | ATF-3                | ATF3     | 0.00942728 | 17         |
| V\$FOXP3_Q1    | FOXP3                | FOXP3    | 0.0113991  | 16         |
| V\$GABPBETA_Q3 | GABP-beta            | GABPB1   | 0.119655   | 15         |
| V\$ATF4_Q6     | ATF-4                | ATF4     | 0.0463478  | 13         |
| V\$YY1_Q2      | YY1                  | YY1      | 0.243341   | 12         |
| V\$MAFK_Q3     | MafK                 | MAFK     | 0.261456   | 12         |
| V\$CEBPB_Q2    | C/EBPbeta            | CEBPB    | 0.231086   | 11         |
| V\$ELK1_Q1     | Elk-1                | ELK1     | 0.276799   | 9          |
| V\$OC2_Q3      | OC-2                 | ONECUT2  | 0.114576   | 8          |

## hsa-mir-383

| Matrix_id  | transcription factor | Gene  | PCC      | Occurrence |
|------------|----------------------|-------|----------|------------|
| V\$PARP_Q4 | PARP                 | PARP1 | 0.324129 | 250        |
| V\$ZIC3_Q1 | Zic3                 | ZIC3  | 0.126025 | 248        |

|                     |                      |        |            |     |
|---------------------|----------------------|--------|------------|-----|
| V\$ETS2_Q6          | c-Ets-2              | ETS2   | 0.0363169  | 224 |
| V\$SOX9_Q4          | SOX9                 | SOX9   | 0.312324   | 215 |
| V\$TBP_Q6           | TBP                  | TBP    | 0.103656   | 210 |
| V\$YY1_01           | YY1                  | YY1    | 0.0590585  | 199 |
| V\$MAZ_Q6           | MAZ                  | MAZ    | 0.161474   | 199 |
| V\$MEF2C_Q4         | MEF-2C               | MEF2C  | 0.694704   | 188 |
| V\$ETS2_B           | c-Ets-2              | ETS2   | 0.0363169  | 186 |
| V\$SOX9_B1          | SOX9                 | SOX9   | 0.312324   | 181 |
| V\$SRY_02           | SRY                  | SRY    | 0.124904   | 169 |
| V\$PARP_Q3          | PARP                 | PARP1  | 0.324129   | 164 |
| V\$PBX1_04          | Pbx1                 | PBX1   | 0.140828   | 151 |
| V\$PBX1_Q3          | Pbx1                 | PBX1   | 0.140828   | 145 |
| V\$HMGIIY_01        | HMGIIY               | HMGAI1 | 0.0889473  | 144 |
| V\$ELK1_02          | Elk-1                | ELK1   | 0.0719113  | 139 |
| V\$YY1_Q6_03        | YY1                  | YY1    | 0.0590585  | 132 |
| V\$LEF1_Q5          | LEF-1                | LEF1   | 0.132255   | 130 |
| V\$GFI1_Q6          | Gfi1                 | GFI1   | 0.0228158  | 129 |
| V\$ELK1_06          | ELK-1                | ELK1   | 0.0719113  | 123 |
| V\$GFI1_Q6_01       | Gfi1                 | GFI1   | 0.0228158  | 123 |
| V\$FOXM1_01         | FOXM1                | FOXM1  | 0.137856   | 117 |
| V\$ERF_02           | ERF                  | ERF    | 0.0923585  | 115 |
| V\$SOX10_Q6         | SOX10                | SOX10  | 0.591931   | 112 |
| V\$CEBPG_Q6_01      | C/EBPgamma           | CEBPG  | 0.138027   | 94  |
| V\$NKX2B_Q3         | NKX2B                | NKX2-2 | 0.765517   | 89  |
| V\$NKX22_02         | NKX2B                | NKX2-2 | 0.765517   | 88  |
| V\$MEF2A_Q6         | mef2A                | MEF2A  | 0.553299   | 86  |
| V\$CACCCBINDINGFACT | CACCC-binding factor | ZNF148 | 0.00312383 | 70  |
| V\$SATB1_Q3         | SATB1                | SATB1  | 0.37927    | 25  |
| V\$POU6F1_01        | POU6F1               | POU6F1 | 0.267865   | 18  |

hsa-mir-409

| Matrix_id    | transcription factor | Gene  | PCC       | Occurrence |
|--------------|----------------------|-------|-----------|------------|
| V\$GKLF_Q4   | GKLF                 | KLF4  | 0.0651953 | 49         |
| V\$PARP_Q4   | PARP                 | PARP1 | 0.0482167 | 48         |
| V\$P300_01   | p300                 | EP300 | 0.0201707 | 48         |
| V\$AP2REP_01 | AP-2rep              | KLF12 | 0.0580681 | 46         |
| V\$PEA3_Q6   | PEA3                 | ETV4  | 0.0730017 | 45         |
| V\$NR1B2_Q6  | NR1B2                | RARB  | 0.0344599 | 41         |
| V\$YY1_01    | YY1                  | YY1   | 0.14981   | 39         |
| V\$GABPA_Q4  | GABP-alpha           | GABPA | 0.0822054 | 37         |
| V\$YY1_Q6    | YY1                  | YY1   | 0.14981   | 37         |
| V\$YY1_Q6_02 | YY1                  | YY1   | 0.14981   | 37         |

|                |            |          |            |    |
|----------------|------------|----------|------------|----|
| V\$HNF4A_Q6_01 | HNF-4alpha | HNF4A    | 0.174762   | 35 |
| V\$BEN_01      | BEN        | GTF2IRD1 | 0.0296612  | 35 |
| V\$AP2ALPHA_Q6 | AP-2alpha  | TFAP2A   | 0.165628   | 31 |
| V\$PBX1_04     | Pbx1       | PBX1     | 0.222953   | 29 |
| V\$CREM_Q6     | CREM       | CREM     | 0.536064   | 27 |
| V\$GATA3_01    | GATA-3     | GATA3    | 0.152355   | 27 |
| V\$AHR_Q5      | AhR        | AHR      | 0.120668   | 27 |
| V\$ZFX_01      | Zfx        | ZFX      | 0.0174768  | 25 |
| V\$GATA2_01    | GATA-2     | GATA2    | 0.0370907  | 24 |
| V\$TCF4_01     | TCF-4      | TCF7L2   | 0.00215121 | 21 |
| V\$FOXP3_01    | FOXP3      | FOXP3    | 0.0606143  | 20 |
| V\$PIT1_Q6     | Pit-1      | POU1F1   | 0.359035   | 18 |
| V\$CEBPB_02    | C/EBPbeta  | CEBPB    | 0.204655   | 17 |
| V\$GABPBETA_Q3 | GABP-beta  | GABPB1   | 0.0705598  | 16 |
| V\$ATF4_Q6     | ATF-4      | ATF4     | 0.0330784  | 15 |
| V\$YY1_02      | YY1        | YY1      | 0.14981    | 15 |
| V\$OC2_Q3      | OC-2       | ONECUT2  | 0.16847    | 14 |
| V\$MAFK_Q3     | MafK       | MAFK     | 0.276862   | 13 |
| V\$ELK1_01     | Elk-1      | ELK1     | 0.238477   | 8  |

hsa-mir-422a

| Matrix_id      | transcription factor | Gene   | PCC      | Occurrence |
|----------------|----------------------|--------|----------|------------|
| V\$PUR1_Q4     | PUR1                 | PURA   | 0.236882 | 722        |
| V\$IK_Q5       | Ikaros               | IKZF1  | 0.576902 | 708        |
| V\$AP2REP_01   | AP-2rep              | KLF12  | 0.775231 | 682        |
| V\$PEA3_Q6     | PEA3                 | ETV4   | 0.596389 | 678        |
| V\$PARP_Q4     | PARP                 | PARP1  | 0.434934 | 676        |
| V\$P300_01     | p300                 | EP300  | 0.540305 | 654        |
| V\$ZIC3_01     | Zic3                 | ZIC3   | 0.444452 | 630        |
| V\$SMAD4_Q6_01 | Smad4                | SMAD4  | 0.576519 | 625        |
| V\$NR1B2_Q6    | NR1B2                | RARB   | 0.811307 | 606        |
| V\$CMYB_Q5     | c-Myb                | MYB    | 0.194824 | 595        |
| V\$MYB_Q6      | c-Myb                | MYB    | 0.194824 | 595        |
| V\$TBX5_02     | TBX5                 | TBX5   | 0.880519 | 586        |
| V\$CDX2_Q5_02  | CDX-2                | CDX2   | 0.69663  | 579        |
| V\$TBP_Q6      | TBP                  | TBP    | 0.264176 | 579        |
| V\$TTF1_Q5     | TTF-1                | NKX2-1 | 0.117163 | 578        |
| V\$CETS1_Q6    | C-ets-1              | ETS1   | 0.743875 | 567        |
| V\$NFAT4_Q3    | NF-AT4               | NFATC3 | 0.364751 | 561        |
| V\$SMAD3_Q6_01 | Smad3                | SMAD3  | 0.59523  | 559        |
| V\$ETS2_Q6     | c-Ets-2              | ETS2   | 0.468685 | 557        |
| V\$ETS1_B      | c-Ets-1              | ETS1   | 0.743875 | 551        |

|                |            |       |           |     |
|----------------|------------|-------|-----------|-----|
| V\$Elf5_Q3     | Elf5       | Elf5  | 0.306361  | 545 |
| V\$GABPA_Q4    | GABP-alpha | GABPA | 0.225917  | 540 |
| V\$MEF2C_Q4    | MEF-2C     | MEF2C | 0.243984  | 536 |
| V\$AML1_Q6     | AML1       | RUNX1 | 0.802759  | 528 |
| V\$GR_Q6       | GR         | NR3C1 | 0.45721   | 525 |
| V\$YY1_Q6      | YY1        | YY1   | 0.0705024 | 517 |
| V\$NANOG_Q2    | Nanog      | NANOG | 0.698039  | 507 |
| V\$HNF4A_Q6_Q1 | HNF-4alpha | HNF4A | 0.479983  | 504 |
| V\$DLX5_Q1     | dlx5       | DLX5  | 0.0149381 | 503 |
| V\$IPF1_Q1     | IPF1       | PDX1  | 0.807003  | 496 |
| V\$YY1_Q6_Q2   | YY1        | YY1   | 0.0705024 | 496 |
| V\$SOX5_Q1     | SOX5       | SOX5  | 0.503409  | 490 |
| V\$TBX5_Q1     | TBX5       | TBX5  | 0.880519  | 487 |
| V\$ETS2_B      | c-Ets-2    | ETS2  | 0.468685  | 482 |
| V\$ERBETA_Q5   | ER-beta    | ESR2  | 0.577366  | 481 |
| V\$GATA1_Q2    | GATA-1     | GATA1 | 0.801471  | 475 |
| V\$SPI1_Q5     | SPI1       | SPI1  | 0.263501  | 465 |
| V\$GATA6_Q1    | GATA-6     | GATA6 | 0.246824  | 457 |
| V\$GATA2_Q2    | GATA-2     | GATA2 | 0.272401  | 457 |
| V\$GATA1_Q6    | GATA-1     | GATA1 | 0.801471  | 457 |
| V\$GATA1_Q5    | GATA-1     | GATA1 | 0.801471  | 457 |
| V\$CDX2_Q5_Q1  | Cdx-2      | CDX2  | 0.69663   | 449 |
| V\$IPF1_Q6     | IPF1       | PDX1  | 0.807003  | 448 |
| V\$IPF1_Q4_Q1  | IPF1       | PDX1  | 0.807003  | 436 |
| V\$CDX2_Q1     | Cdx-2      | CDX2  | 0.69663   | 436 |
| V\$SRY_Q2      | SRY        | SRY   | 0.449059  | 430 |
| V\$PITX3_Q2    | PITX3      | PITX3 | 0.530369  | 426 |
| V\$FOXO3A_Q1   | FOXO3A     | FOXO3 | 0.352378  | 417 |
| V\$PARP_Q3     | PARP       | PARP1 | 0.434934  | 416 |
| V\$IRF4_Q6     | IRF-4      | IRF4  | 0.790363  | 399 |
| V\$HNF3B_Q6    | HNF-3beta  | FOXA2 | 0.370497  | 397 |
| V\$CRX_Q4      | Crx        | CRX   | 0.720034  | 386 |
| V\$HNF3A_Q1    | HNF3A      | FOXA1 | 0.41439   | 367 |
| V\$GATA2_Q1    | GATA-2     | GATA2 | 0.272401  | 359 |
| V\$IPF1_Q4     | IPF1       | PDX1  | 0.807003  | 353 |
| V\$PITX2_Q2    | Pitx2      | PITX2 | 0.590155  | 349 |
| V\$CMaf_Q1     | c-Maf      | MAF   | 0.333872  | 348 |
| V\$SOX10_Q6    | SOX10      | SOX10 | 0.325047  | 340 |
| V\$GFI1_Q6     | Gfi1       | GFI1  | 0.396568  | 340 |
| V\$RFX1_Q2     | RFX1       | RFX1  | 0.720734  | 327 |
| V\$TEF1_Q6_Q3  | TEF-1      | TEAD1 | 0.752515  | 320 |
| V\$CEBPE_Q6    | CEBPE      | CEBPE | 0.804192  | 318 |
| V\$ERR1_Q3     | ERR1       | ESRRA | 0.905361  | 315 |
| V\$AML1_Q1     | AML1a      | RUNX1 | 0.802759  | 303 |
| V\$FOXM1_Q1    | FOXM1      | FOXM1 | 0.0982682 | 302 |
| V\$GR_Q1       | GR         | NR3C1 | 0.45721   | 284 |



|               |            |         |            |     |
|---------------|------------|---------|------------|-----|
| V\$TEF1_Q6    | TEF-1      | TEAD1   | 0.752515   | 283 |
| V\$OC2_Q3     | OC-2       | ONECUT2 | 0.835899   | 280 |
| V\$AML1_Q4    | AML1       | RUNX1   | 0.802759   | 274 |
| V\$SMAD3_Q6   | SMAD3      | SMAD3   | 0.59523    | 273 |
| V\$NEUROD_02  | NeuroD     | NEUROD1 | 0.643652   | 266 |
| V\$HOXA9_01   | hoxa9      | HOXA9   | 0.453302   | 259 |
| V\$IRF7_Q3    | IRF-7      | IRF7    | 0.305314   | 259 |
| V\$HBP1_Q2    | hbp1       | HBP1    | 0.149123   | 256 |
| V\$CEBPB_02   | C/EBPbeta  | CEBPB   | 0.136818   | 250 |
| V\$CEBPD_Q6   | C/EBPdelta | CEBPD   | 0.119341   | 248 |
| V\$NKX22_02   | NKX2B      | NKX2-2  | 0.175308   | 245 |
| V\$NKX2B_Q3   | NKX2B      | NKX2-2  | 0.175308   | 241 |
| V\$BCL6_Q3_01 | Bcl-6      | BCL6    | 0.654333   | 237 |
| V\$CDX1_01    | Cdx-1      | CDX1    | 0.53273    | 233 |
| V\$CEBPB_Q6   | C/EBPbeta  | CEBPB   | 0.136818   | 217 |
| V\$GATA2_03   | GATA-2     | GATA2   | 0.272401   | 217 |
| V\$AML2_01    | AML2       | RUNX3   | 0.627736   | 212 |
| V\$CDX2_Q5    | Cdx-2      | CDX2    | 0.69663    | 191 |
| V\$IPF1_02    | IPF1       | PDX1    | 0.807003   | 181 |
| V\$HNF6_Q6    | HNF6       | ONECUT1 | 0.348004   | 179 |
| V\$MEIS1_01   | MEIS1      | MEIS1   | 0.00174989 | 174 |
| V\$RORBETA_Q2 | RORBETA    | RORB    | 0.662983   | 154 |
| V\$CIZ_01     | CIZ        | ZNF384  | 0.528773   | 148 |
| V\$STAT4_Q5   | STAT4      | STAT4   | 0.714796   | 143 |
| V\$POU6F1_03  | POU6F1     | POU6F1  | 0.692995   | 113 |
| V\$SOX2_Q6    | SOX2       | SOX2    | 0.0940149  | 107 |
| V\$HSF1_01    | HSF1       | HSF1    | 0.811883   | 93  |
| V\$POU6F1_02  | POU6F1     | POU6F1  | 0.692995   | 88  |
| V\$SPIB_01    | SPI-B      | SPIB    | 0.731066   | 83  |
| V\$MAFK_Q3    | MafK       | MAFK    | 0.779143   | 77  |
| V\$HOXA7_01   | HOXA7      | HOXA7   | 0.376998   | 70  |
| V\$RORA1_01   | RORalpha1  | RORA    | 0.1754     | 59  |
| V\$POU3F2_02  | POU3F2     | POU3F2  | 0.741385   | 59  |
| V\$RORA_Q4    | RORalpha   | RORA    | 0.1754     | 54  |
| V\$BACH2_01   | Bach2      | BACH2   | 0.660162   | 47  |
| V\$RORA2_01   | RORalpha2  | RORA    | 0.1754     | 28  |
| V\$HSF2_01    | HSF2       | HSF2    | 0.396999   | 25  |

hsa-mir-423

| Matrix_id  | transcription factor | Gene  | PCC      | Occurrence |
|------------|----------------------|-------|----------|------------|
| V\$PARP_Q4 | PARP                 | PARP1 | 0.399176 | 24         |
| V\$PUR1_Q4 | PUR1                 | PURA  | 0.411233 | 24         |

|                |            |               |            |    |
|----------------|------------|---------------|------------|----|
| V\$MAFB_01     | MAFB       | MAFB          | 0.0802959  | 23 |
| V\$P300_01     | p300       | EP300         | 0.04919    | 22 |
| V\$ZIC3_01     | Zic3       | ZIC3          | 0.0577577  | 22 |
| V\$YY1_Q6_02   | YY1        | YY1           | 0.302139   | 21 |
| V\$DLX5_01     | dlx5       | DLX5          | 0.198325   | 21 |
| V\$GKLF_Q4     | GKLF       | KLF4          | 0.116376   | 21 |
| V\$YY1_Q6      | YY1        | YY1           | 0.302139   | 20 |
| V\$TBP_Q6      | TBP        | TBP           | 0.0874085  | 20 |
| V\$MEF2C_Q4    | MEF-2C     | MEF2C         | 0.56015    | 19 |
| V\$AML1_Q6     | AML1       | RUNX1         | 0.0729633  | 18 |
| V\$NR1B2_Q6    | NR1B2      | RARB          | 0.113636   | 18 |
| V\$BEN_01      | BEN        | GTF2IRD1      | 0.0544974  | 17 |
| V\$GATA6_01    | GATA-6     | GATA6         | 0.313382   | 17 |
| V\$GATA3_02    | GATA-3     | GATA3         | 0.0611715  | 17 |
| V\$GATA2_02    | GATA-2     | GATA2         | 0.0373258  | 17 |
| V\$PITX3_Q2    | PITX3      | PITX3         | 0.211306   | 17 |
| V\$AHR_Q5      | AhR        | AHR           | 0.00804603 | 16 |
| V\$SOX9_Q4     | SOX9       | SOX9          | 0.196371   | 16 |
| V\$ING4_01     | ING4       | ING4          | 0.40576    | 16 |
| V\$HIF1A_Q6    | HIF-1alpha | HIF1A         | 0.471096   | 16 |
| V\$YY1_01      | YY1        | YY1           | 0.302139   | 16 |
| V\$GR_Q6       | GR         | NR3C1         | 0.181128   | 16 |
| V\$HNF4A_Q6_01 | HNF-4alpha | HNF4A         | 0.11483    | 14 |
| V\$GATA3_01    | GATA-3     | GATA3         | 0.0611715  | 13 |
| V\$LHX3b_01    | LHX3b      | LHX3          | 0.0838779  | 12 |
| V\$PDEF_02     | PDEF       | SPDEF         | 0.0999079  | 10 |
| V\$AML1_01     | AML1a      | RUNX1         | 0.0729633  | 10 |
| V\$CREM_Q6     | CREM       | CREM          | 0.355357   | 10 |
| V\$STAT3_03    | STAT3      | STAT3         | 0.0663789  | 9  |
| V\$MEF2A_Q6    | mef2A      | MEF2A         | 0.444348   | 9  |
| V\$SREBP1_Q6   | SREBP-1    | SREBF1        | 0.517251   | 9  |
| V\$HOX13_02    | HOXA5      | HOXA5         | 0.482217   | 8  |
| V\$AML1_Q4     | AML1       | RUNX1         | 0.0729633  | 8  |
| V\$E2F1_Q3     | E2F-1      | E2F1          | 0.273847   | 8  |
| V\$ZIC1_01     | Zic1       | ZIC1          | 0.624681   | 8  |
| V\$ATF1_Q6_01  | ATF-1      | ATF1          | 0.0214282  | 8  |
| V\$E2F1_Q3_01  | E2F-1      | E2F1          | 0.273847   | 7  |
| V\$E2F1_Q6_01  | E2F-1      | E2F1          | 0.273847   | 7  |
| V\$FOXJ2_02    | FOXJ2      | FOXJ2         | 0.209407   | 7  |
| V\$CART1_02    | CART1      | ALX1          | 0.0770741  | 7  |
| V\$PAX3_B      | Pax-3      | PAX3          | 0.0031746  | 7  |
| V\$IRF8_Q6     | IRF-8      | IRF8          | 0.140856   | 7  |
| V\$E2F1_Q6     | E2F-1      | E2F1          | 0.273847   | 7  |
| V\$DEC2_Q2     |            | 2-Dec BHLHE41 | 0.451867   | 6  |
| V\$ATF4_Q6     | ATF-4      | ATF4          | 0.0573288  | 5  |
| V\$CDP_02      | CDP        | CUX1          | 0.276147   | 4  |

|            |       |          |           |   |
|------------|-------|----------|-----------|---|
| V\$IRF2_01 | IRF-2 | IRF2     | 0.544343  | 3 |
| V\$BEN_02  | BEN   | GTF2IRD1 | 0.0544974 | 3 |
| V\$PAX3_01 | Pax-3 | PAX3     | 0.0031746 | 3 |

hsa-mir-424

| Matrix_id      | transcription factor | Gene   | PCC        | Occurrence |
|----------------|----------------------|--------|------------|------------|
| V\$PUR1_Q4     | PUR1                 | PURA   | 0.133935   | 254        |
| V\$PEA3_Q6     | PEA3                 | ETV4   | 0.149245   | 247        |
| V\$PARP_Q4     | PARP                 | PARP1  | 0.0977696  | 246        |
| V\$ELF1_Q6     | Elf-1                | ELF1   | 0.0903022  | 244        |
| V\$GKLF_Q4     | GKLF                 | KLF4   | 0.556734   | 236        |
| V\$P300_01     | p300                 | EP300  | 0.363605   | 225        |
| V\$ETS1_B      | c-Ets-1              | ETS1   | 0.0662677  | 225        |
| V\$CETS1_Q6    | C-ets-1              | ETS1   | 0.0662677  | 219        |
| V\$SMAD4_Q6_01 | Smad4                | SMAD4  | 0.324426   | 216        |
| V\$GABPA_Q4    | GABP-alpha           | GABPA  | 0.362676   | 208        |
| V\$TBX5_02     | TBX5                 | TBX5   | 0.0999859  | 197        |
| V\$TBP_Q6      | TBP                  | TBP    | 0.228594   | 194        |
| V\$GR_Q6       | GR                   | NR3C1  | 0.141711   | 194        |
| V\$YY1_01      | YY1                  | YY1    | 0.357751   | 190        |
| V\$DLX5_01     | dlx5                 | DLX5   | 0.732503   | 174        |
| V\$YY1_Q6_02   | YY1                  | YY1    | 0.357751   | 173        |
| V\$YY1_Q6      | YY1                  | YY1    | 0.357751   | 173        |
| V\$GATA1_02    | GATA-1               | GATA1  | 0.0146568  | 170        |
| V\$GATA1_06    | GATA-1               | GATA1  | 0.0146568  | 163        |
| V\$GATA2_02    | GATA-2               | GATA2  | 0.693203   | 163        |
| V\$GATA1_05    | GATA-1               | GATA1  | 0.0146568  | 163        |
| V\$TBX5_01     | TBX5                 | TBX5   | 0.0999859  | 155        |
| V\$PARP_Q3     | PARP                 | PARP1  | 0.0977696  | 153        |
| V\$ERBETA_Q5   | ER-beta              | ESR2   | 0.0915042  | 152        |
| V\$GATA1_04    | GATA-1               | GATA1  | 0.0146568  | 144        |
| V\$HMG1Y_01    | HMG1Y                | HMGA1  | 0.359626   | 141        |
| V\$GATA3_02    | GATA-3               | GATA3  | 0.890682   | 141        |
| V\$YY1_Q6_03   | YY1                  | YY1    | 0.357751   | 129        |
| V\$CEBPE_Q6    | CEBPE                | CEBPE  | 0.00415779 | 116        |
| V\$CEBPA_Q6    | C/EBPalpha           | CEBPA  | 0.0512646  | 114        |
| V\$TCF4_01     | TCF-4                | TCF7L2 | 0.466281   | 114        |
| V\$TCF4_Q5     | TCF-4                | TCF7L2 | 0.466281   | 106        |
| V\$IRF7_Q3     | IRF-7                | IRF7   | 0.0609313  | 103        |
| V\$FOXJ2_01    | FOXJ2                | FOXJ2  | 0.0817866  | 100        |
| V\$GABPBETA_Q3 | GABP-beta            | GABPB1 | 0.279504   | 96         |
| V\$CREM_Q6     | CREM                 | CREM   | 0.246988   | 93         |

|                |            |        |           |    |
|----------------|------------|--------|-----------|----|
| V\$HBP1_Q2     | hbp1       | HBP1   | 0.670397  | 88 |
| V\$CEBPG_Q6_01 | C/EBPgamma | CEBPG  | 0.559674  | 79 |
| V\$GATA2_03    | GATA-2     | GATA2  | 0.693203  | 78 |
| V\$FOXO4_02    | FOXO4      | FOXO4  | 0.941503  | 69 |
| V\$CEBPA_01    | C/EBPalpha | CEBPA  | 0.0512646 | 68 |
| V\$P53_02      | p53        | TP53   | 0.619805  | 64 |
| V\$CIZ_01      | CIZ        | ZNF384 | 0.101214  | 54 |
| V\$IRF1_Q6_01  | IRF-1      | IRF1   | 0.318356  | 47 |
| V\$CEBPG_Q6    | C/EBPgamma | CEBPG  | 0.559674  | 45 |
| V\$IRF1_Q6     | IRF-1      | IRF1   | 0.318356  | 43 |
| V\$CDP_04      | CDP        | CUX1   | 0.330086  | 37 |
| V\$FOXO4_01    | FOXO4      | FOXO4  | 0.941503  | 32 |
| V\$FOXJ2_02    | FOXJ2      | FOXJ2  | 0.0817866 | 31 |
| V\$TCF4_Q5_01  | TCF-4      | TCF7L2 | 0.466281  | 17 |

hsa-mir-425

| Matrix_id      | transcription factor | Gene   | PCC        | Occurrence |
|----------------|----------------------|--------|------------|------------|
| V\$ING4_01     | ING4                 | ING4   | 0.51036    | 7          |
| V\$MAFB_01     | MAFB                 | MAFB   | 0.25457    | 7          |
| V\$GKLF_Q4     | GKLF                 | KLF4   | 0.199429   | 7          |
| V\$PUR1_Q4     | PUR1                 | PURA   | 0.360231   | 7          |
| V\$PARP_Q4     | PARP                 | PARP1  | 0.186204   | 7          |
| V\$GABPBETA_Q3 | GABP-beta            | GABPB1 | 0.075266   | 6          |
| V\$SOX9_B1     | SOX9                 | SOX9   | 0.0913982  | 6          |
| V\$GR_Q6       | GR                   | NR3C1  | 0.0240025  | 6          |
| V\$PBX1_Q3     | Pbx1                 | PBX1   | 0.175736   | 6          |
| V\$GATA3_01    | GATA-3               | GATA3  | 0.46837    | 6          |
| V\$DLX5_01     | dlx5                 | DLX5   | 0.239588   | 6          |
| V\$MEF2C_Q4    | MEF-2C               | MEF2C  | 0.375138   | 5          |
| V\$TFIIQ_Q6    | TFII-I               | GTF2I  | 0.0296081  | 5          |
| V\$GATA2_01    | GATA-2               | GATA2  | 0.309342   | 5          |
| V\$CREM_Q6     | CREM                 | CREM   | 0.0958731  | 4          |
| V\$HOXB8_01    | HOXB8                | HOXB8  | 0.0922613  | 4          |
| V\$ATF3_Q6_01  | ATF-3                | ATF3   | 0.00619989 | 4          |
| V\$PBX1_Q4     | Pbx1                 | PBX1   | 0.175736   | 4          |
| V\$SOX9_Q4     | SOX9                 | SOX9   | 0.0913982  | 4          |
| V\$GR_Q1       | GR                   | NR3C1  | 0.0240025  | 4          |
| V\$SREBP1_Q6   | SREBP-1              | SREBF1 | 0.274121   | 4          |
| V\$YY1_Q1      | YY1                  | YY1    | 0.296622   | 4          |
| V\$CEBPG_Q6_01 | C/EBPgamma           | CEBPG  | 0.463941   | 3          |
| V\$TCF4_Q1     | TCF-4                | TCF7L2 | 0.165885   | 3          |
| V\$ZIC1_Q1     | Zic1                 | ZIC1   | 0.520813   | 3          |

|               |            |        |          |   |
|---------------|------------|--------|----------|---|
| V\$CEBPG_Q6   | C/EBPgamma | CEBPG  | 0.463941 | 3 |
| V\$TCF4_Q5    | TCF-4      | TCF7L2 | 0.165885 | 3 |
| V\$NKX22_Q2   | NKX2B      | NKX2-2 | 0.407206 | 3 |
| V\$HBP1_Q2    | hbp1       | HBP1   | 0.136215 | 3 |
| V\$NKX2B_Q3   | NKX2B      | NKX2-2 | 0.407206 | 3 |
| V\$AMEF2_Q6   | aMEF-2     | MEF2A  | 0.423249 | 2 |
| V\$ZID_Q1     | ZID        | ZBTB6  | 0.140433 | 1 |
| V\$ERR3_Q2_Q1 | ERR3       | ESRRG  | 0.149949 | 1 |

hsa-mir-429

| Matrix_id         | transcription factor | Gene  | PCC       | Occurrence |
|-------------------|----------------------|-------|-----------|------------|
| V\$SOX9_B1        | SOX9                 | SOX9  | 0.215688  | 2          |
| V\$Elf5_Q3        | ELF5                 | ELF5  | 0.119329  | 2          |
| V\$HNF4A_Q6_Q1    | HNF-4alpha           | HNF4A | 0.0611599 | 2          |
| V\$STAT3_Q3       | STAT3                | STAT3 | 0.197422  | 2          |
| V\$SOX9_Q4        | SOX9                 | SOX9  | 0.215688  | 2          |
| V\$MYOGENIN_Q6_Q1 | myogenin             | MYOG  | 0.0230405 | 2          |
| V\$VDR_Q3         | VDR                  | VDR   | 0.0094247 | 2          |
| V\$ELF1_Q6        | Elf-1                | ELF1  | 0.290406  | 2          |
| V\$MYOGENIN_Q6    | myogenin             | MYOG  | 0.0230405 | 2          |
| V\$ZIC3_Q1        | Zic3                 | ZIC3  | 0.169117  | 2          |
| V\$EGR1_Q2        | EGR-1                | EGR1  | 0.235455  | 1          |
| V\$ATF3_Q6_Q1     | ATF-3                | ATF3  | 0.0933666 | 1          |
| V\$KLF15_Q2       | KLF15                | KLF15 | 0.0930646 | 1          |
| V\$HNF3A_Q1       | HNF3A                | FOXA1 | 0.0802477 | 1          |
| V\$HOXA7_Q1       | HOXA7                | HOXA7 | 0.119591  | 1          |

hsa-mir-432

| Matrix_id   | transcription factor | Gene  | PCC       | Occurrence |
|-------------|----------------------|-------|-----------|------------|
| V\$PUR1_Q4  | PUR1                 | PURA  | 0.203029  | 26         |
| V\$MAFB_Q1  | MAFB                 | MAFB  | 0.218449  | 26         |
| V\$GKLF_Q4  | GKLF                 | KLF4  | 0.352655  | 25         |
| V\$ELF1_Q6  | Elf-1                | ELF1  | 0.0246084 | 25         |
| V\$PEA3_Q6  | PEA3                 | ETV4  | 0.0356127 | 24         |
| V\$PARP_Q4  | PARP                 | PARP1 | 0.213237  | 24         |
| V\$GATA6_Q1 | GATA-6               | GATA6 | 0.237396  | 20         |
| V\$GATA2_Q2 | GATA-2               | GATA2 | 0.439235  | 20         |
| V\$GABPA_Q4 | GABP-alpha           | GABPA | 0.344267  | 20         |

|                |           |        |           |    |
|----------------|-----------|--------|-----------|----|
| V\$TBP_Q6      | TBP       | TBP    | 0.13134   | 20 |
| V\$P300_01     | p300      | EP300  | 0.2232    | 19 |
| V\$GATA3_02    | GATA-3    | GATA3  | 0.661694  | 18 |
| V\$YY1_01      | YY1       | YY1    | 0.363741  | 18 |
| V\$GATA3_01    | GATA-3    | GATA3  | 0.661694  | 17 |
| V\$DLX5_01     | dlx5      | DLX5   | 0.647185  | 17 |
| V\$GATA2_01    | GATA-2    | GATA2  | 0.439235  | 16 |
| V\$AHR_Q5      | AhR       | AHR    | 0.698504  | 16 |
| V\$MEF2C_Q4    | MEF-2C    | MEF2C  | 0.160399  | 15 |
| V\$PARP_Q3     | PARP      | PARP1  | 0.213237  | 14 |
| V\$ING4_01     | ING4      | ING4   | 0.198323  | 13 |
| V\$PBX1_Q3     | Pbx1      | PBX1   | 0.131841  | 13 |
| V\$HMGIIY_01   | HMGIIY    | HMGAI1 | 0.179264  | 12 |
| V\$PBX1_04     | Pbx1      | PBX1   | 0.131841  | 11 |
| V\$GATA2_03    | GATA-2    | GATA2  | 0.439235  | 11 |
| V\$GABPBETA_Q3 | GABP-beta | GABPB1 | 0.175006  | 10 |
| V\$GATA3_03    | GATA-3    | GATA3  | 0.661694  | 10 |
| V\$TCF4_01     | TCF-4     | TCF7L2 | 0.265251  | 9  |
| V\$YY1_02      | YY1       | YY1    | 0.363741  | 9  |
| V\$MEF2A_Q6    | mef2A     | MEF2A  | 0.0373571 | 8  |
| V\$FOXJ2_01    | FOXJ2     | FOXJ2  | 0.123366  | 8  |
| V\$IRF1_Q6_01  | IRF-1     | IRF1   | 0.0778297 | 7  |
| V\$HBP1_Q2     | hbp1      | HBP1   | 0.517055  | 7  |
| V\$MEIS1_01    | MEIS1     | MEIS1  | 0.0609311 | 7  |
| V\$HOXA13_02   | HOXA5     | HOXA5  | 0.359085  | 7  |
| V\$PIT1_Q6     | Pit-1     | POU1F1 | 0.0102932 | 7  |
| V\$IRF1_Q6     | IRF-1     | IRF1   | 0.0778297 | 7  |
| V\$ELK1_01     | Elk-1     | ELK1   | 0.17984   | 6  |
| V\$CIZ_01      | CIZ       | ZNF384 | 0.213989  | 6  |
| V\$IRF2_01     | IRF-2     | IRF2   | 0.346608  | 2  |
| V\$RORA1_01    | RORalpha1 | RORA   | 0.262882  | 1  |
| V\$BLIMP1_Q6   | Blimp-1   | PRDM1  | 0.0976295 | 1  |

hsa-mir-433

| Matrix_id  | transcription factor | Gene  | PCC       | Occurrence |
|------------|----------------------|-------|-----------|------------|
| V\$PUR1_Q4 | PUR1                 | PURA  | 0.395881  | 63         |
| V\$GKLF_Q4 | GKLF                 | KLF4  | 0.112909  | 61         |
| V\$MAFB_01 | MAFB                 | MAFB  | 0.251445  | 61         |
| V\$P300_01 | p300                 | EP300 | 0.124034  | 59         |
| V\$PARP_Q4 | PARP                 | PARP1 | 0.40133   | 58         |
| V\$AHR_Q5  | AhR                  | AHR   | 0.398285  | 54         |
| V\$ZIC3_01 | Zic3                 | ZIC3  | 0.0698666 | 52         |

|                |            |        |           |    |
|----------------|------------|--------|-----------|----|
| V\$TBP_Q6      | TBP        | TBP    | 0.0976548 | 50 |
| V\$YY1_01      | YY1        | YY1    | 0.29662   | 49 |
| V\$DLX5_01     | dlx5       | DLX5   | 0.425357  | 48 |
| V\$GABPA_Q4    | GABP-alpha | GABPA  | 0.303479  | 47 |
| V\$ING4_01     | ING4       | ING4   | 0.566442  | 46 |
| V\$ETS2_Q6     | c-Ets-2    | ETS2   | 0.0878396 | 45 |
| V\$MEF2C_Q4    | MEF-2C     | MEF2C  | 0.610186  | 44 |
| V\$MAZ_Q6      | MAZ        | MAZ    | 0.134893  | 44 |
| V\$SOX9_B1     | SOX9       | SOX9   | 0.0799589 | 43 |
| V\$GATA2_02    | GATA-2     | GATA2  | 0.202364  | 41 |
| V\$GATA6_01    | GATA-6     | GATA6  | 0.0460925 | 41 |
| V\$ETS2_B      | c-Ets-2    | ETS2   | 0.0878396 | 41 |
| V\$PBX1_Q3     | Pbx1       | PBX1   | 0.233389  | 38 |
| V\$GATA3_02    | GATA-3     | GATA3  | 0.352864  | 38 |
| V\$SRY_02      | SRY        | SRY    | 0.0540553 | 36 |
| V\$HMG1Y_01    | HMG1Y      | HMGA1  | 0.0547366 | 35 |
| V\$PARP_Q3     | PARP       | PARP1  | 0.40133   | 33 |
| V\$MAZ_Q6_01   | MAZ        | MAZ    | 0.134893  | 33 |
| V\$GATA3_01    | GATA-3     | GATA3  | 0.352864  | 32 |
| V\$GATA2_01    | GATA-2     | GATA2  | 0.202364  | 28 |
| V\$PBX1_04     | Pbx1       | PBX1   | 0.233389  | 27 |
| V\$FOXJ2_01    | FOXJ2      | FOXJ2  | 0.0322552 | 27 |
| V\$GATA3_03    | GATA-3     | GATA3  | 0.352864  | 26 |
| V\$GABPBETA_Q3 | GABP-beta  | GABPB1 | 0.0947236 | 25 |
| V\$YY1_02      | YY1        | YY1    | 0.29662   | 22 |
| V\$HBP1_Q2     | hbp1       | HBP1   | 0.214151  | 21 |
| V\$GATA2_03    | GATA-2     | GATA2  | 0.202364  | 20 |
| V\$MEF2A_Q6    | mef2A      | MEF2A  | 0.442267  | 20 |
| V\$TCF4_01     | TCF-4      | TCF7L2 | 0.0887237 | 18 |
| V\$ELK1_01     | Elk-1      | ELK1   | 0.188351  | 15 |
| V\$HOXB8_01    | HOXB8      | HOXB8  | 0.108716  | 14 |
| V\$HOX13_02    | HOXA5      | HOXA5  | 0.152961  | 13 |
| V\$POU6F1_03   | POU6F1     | POU6F1 | 0.217573  | 11 |
| V\$CIZ_01      | CIZ        | ZNF384 | 0.0983586 | 9  |
| V\$POU6F1_02   | POU6F1     | POU6F1 | 0.217573  | 7  |
| V\$IRF2_01     | IRF-2      | IRF2   | 0.238237  | 6  |
| V\$RORA1_01    | RORalpha1  | RORA   | 0.0873993 | 6  |
| V\$SATB1_Q3    | SATB1      | SATB1  | 0.0501951 | 4  |
| V\$POU3F2_01   | POU3F2     | POU3F2 | 0.0275594 | 3  |

hsa-mir-449a

| Matrix_id | transcription factor | Gene | PCC | Occurrence |
|-----------|----------------------|------|-----|------------|
|-----------|----------------------|------|-----|------------|

|               |           |        |            |     |
|---------------|-----------|--------|------------|-----|
| V\$AP2REP_01  | AP-2rep   | KLF12  | 0.0926368  | 318 |
| V\$GKLF_Q4    | GKLF      | KLF4   | 0.216446   | 318 |
| V\$PEA3_Q6    | PEA3      | ETV4   | 0.110895   | 314 |
| V\$PARP_Q4    | PARP      | PARP1  | 0.183884   | 313 |
| V\$P300_01    | p300      | EP300  | 0.0521469  | 309 |
| V\$TBP_Q6     | TBP       | TBP    | 0.789443   | 282 |
| V\$SOX9_Q4    | SOX9      | SOX9   | 0.681885   | 276 |
| V\$GATA1_01   | GATA-1    | GATA1  | 0.145615   | 270 |
| V\$CETS1_Q6   | C-ets-1   | ETS1   | 0.126744   | 269 |
| V\$YY1_01     | YY1       | YY1    | 0.155546   | 267 |
| V\$NFAT4_Q3   | NF-AT4    | NFATC3 | 0.0634676  | 266 |
| V\$ETS1_B     | c-Ets-1   | ETS1   | 0.126744   | 263 |
| V\$DLX5_01    | dlx5      | DLX5   | 0.28082    | 251 |
| V\$SOX5_01    | SOX5      | SOX5   | 0.618166   | 243 |
| V\$SOX9_B1    | SOX9      | SOX9   | 0.681885   | 242 |
| V\$SRY_02     | SRY       | SRY    | 0.134494   | 216 |
| V\$GATA1_06   | GATA-1    | GATA1  | 0.145615   | 215 |
| V\$GATA1_05   | GATA-1    | GATA1  | 0.145615   | 215 |
| V\$GATA1_02   | GATA-1    | GATA1  | 0.145615   | 214 |
| V\$NKX32_01   | Nkx3-2    | NKX3-2 | 0.301695   | 211 |
| V\$PITX3_Q2   | PITX3     | PITX3  | 0.00976624 | 210 |
| V\$MAZ_Q6     | MAZ       | MAZ    | 0.344514   | 205 |
| V\$ERBETA_Q5  | ER-beta   | ESR2   | 0.225526   | 205 |
| V\$ING4_01    | ING4      | ING4   | 0.0549097  | 197 |
| V\$HNF3B_Q6   | HNF-3beta | FOXA2  | 0.0854144  | 186 |
| V\$PARP_Q3    | PARP      | PARP1  | 0.183884   | 183 |
| V\$NFAT2_Q5   | NF-AT2    | NFATC1 | 0.151835   | 174 |
| V\$GATA1_04   | GATA-1    | GATA1  | 0.145615   | 172 |
| V\$YY1_Q6_03  | YY1       | YY1    | 0.155546   | 166 |
| V\$FOXJ2_01   | FOXJ2     | FOXJ2  | 0.280397   | 165 |
| V\$IRF8_Q6    | IRF-8     | IRF8   | 0.084734   | 151 |
| V\$TCF4_Q5    | TCF-4     | TCF7L2 | 0.109658   | 148 |
| V\$TCF4_01    | TCF-4     | TCF7L2 | 0.109658   | 135 |
| V\$WT1_Q6     | WT1       | WT1    | 0.185784   | 122 |
| V\$CDX1_01    | Cdx-1     | CDX1   | 0.0828025  | 106 |
| V\$LHX3b_01   | LHX3b     | LHX3   | 0.133695   | 98  |
| V\$CIZ_01     | CIZ       | ZNF384 | 0.0954951  | 84  |
| V\$IRF1_Q6    | IRF-1     | IRF1   | 0.0101855  | 62  |
| V\$IRF1_Q6_01 | IRF-1     | IRF1   | 0.0101855  | 58  |
| V\$LHX3_01    | Lhx3      | LHX3   | 0.133695   | 55  |
| V\$HSF1_01    | HSF1      | HSF1   | 0.198501   | 33  |
| V\$AR_Q2      | AR        | AR     | 0.0398411  | 19  |



| Matrix_id      | transcription factor | Gene   | PCC        | Occurrence |
|----------------|----------------------|--------|------------|------------|
| V\$PUR1_Q4     | PUR1                 | PURA   | 0.16005    | 263        |
| V\$PEA3_Q6     | PEA3                 | ETV4   | 0.0983111  | 257        |
| V\$PARP_Q4     | PARP                 | PARP1  | 0.0995149  | 254        |
| V\$ELF1_Q6     | Elf-1                | ELF1   | 0.165773   | 249        |
| V\$GKLF_Q4     | GKLF                 | KLF4   | 0.567492   | 246        |
| V\$MAFB_Q1     | MAFB                 | MAFB   | 0.300398   | 241        |
| V\$ETS1_B      | c-Ets-1              | ETS1   | 0.0679363  | 230        |
| V\$CETS1_Q6    | C-ets-1              | ETS1   | 0.0679363  | 224        |
| V\$SMAD4_Q6_Q1 | Smad4                | SMAD4  | 0.308843   | 223        |
| V\$GATA1_Q1    | GATA-1               | GATA1  | 0.0170848  | 213        |
| V\$GABPA_Q4    | GABP-alpha           | GABPA  | 0.364776   | 212        |
| V\$TBP_Q6      | TBP                  | TBP    | 0.156746   | 202        |
| V\$GR_Q6       | GR                   | NR3C1  | 0.157584   | 201        |
| V\$YY1_Q1      | YY1                  | YY1    | 0.367543   | 197        |
| V\$AML1_Q6     | AML1                 | RUNX1  | 0.00174447 | 188        |
| V\$DLX5_Q1     | dlx5                 | DLX5   | 0.691609   | 178        |
| V\$YY1_Q6_Q2   | YY1                  | YY1    | 0.367543   | 176        |
| V\$YY1_Q6      | YY1                  | YY1    | 0.367543   | 176        |
| V\$GATA1_Q2    | GATA-1               | GATA1  | 0.0170848  | 173        |
| V\$GATA1_Q5    | GATA-1               | GATA1  | 0.0170848  | 165        |
| V\$GATA2_Q2    | GATA-2               | GATA2  | 0.695429   | 165        |
| V\$GATA1_Q6    | GATA-1               | GATA1  | 0.0170848  | 165        |
| V\$ERBETA_Q5   | ER-beta              | ESR2   | 0.0421464  | 160        |
| V\$PARP_Q3     | PARP                 | PARP1  | 0.0995149  | 159        |
| V\$FKLF_Q5     | FKLF                 | KLF11  | 0.23915    | 148        |
| V\$HMG1Y_Q1    | HMG1Y                | HMGA1  | 0.341965   | 145        |
| V\$GATA3_Q2    | GATA-3               | GATA3  | 0.912183   | 141        |
| V\$SREBP1_Q6   | SREBP-1              | SREBF1 | 0.138094   | 137        |
| V\$YY1_Q6_Q3   | YY1                  | YY1    | 0.367543   | 132        |
| V\$CEBPE_Q6    | CEBPE                | CEBPE  | 0.0285527  | 121        |
| V\$GR_Q1       | GR                   | NR3C1  | 0.157584   | 119        |
| V\$TCF4_Q1     | TCF-4                | TCF7L2 | 0.46753    | 118        |
| V\$CEBPA_Q6    | C/EBPalpha           | CEBPA  | 0.0713893  | 117        |
| V\$TCF4_Q5     | TCF-4                | TCF7L2 | 0.46753    | 111        |
| V\$IRF7_Q3     | IRF-7                | IRF7   | 0.130981   | 107        |
| V\$FOXJ2_Q1    | FOXJ2                | FOXJ2  | 0.0461565  | 106        |
| V\$CREM_Q6     | CREM                 | CREM   | 0.172813   | 98         |
| V\$GABPBETA_Q3 | GABP-beta            | GABPB1 | 0.228391   | 96         |
| V\$HBP1_Q2     | hbp1                 | HBP1   | 0.668623   | 90         |
| V\$CEBPG_Q6_Q1 | C/EBPgamma           | CEBPG  | 0.547814   | 82         |
| V\$GATA2_Q3    | GATA-2               | GATA2  | 0.695429   | 77         |
| V\$STAT3_Q3    | STAT3                | STAT3  | 0.146628   | 76         |
| V\$FOXO4_Q2    | FOXO4                | FOXO4  | 0.956047   | 75         |

|               |            |        |           |    |
|---------------|------------|--------|-----------|----|
| V\$YY1_02     | YY1        | YY1    | 0.367543  | 74 |
| V\$CEBPA_01   | C/EBPalpha | CEBPA  | 0.0713893 | 72 |
| V\$P53_02     | p53        | TP53   | 0.605859  | 66 |
| V\$E2F4_Q6    | E2F-4      | E2F4   | 0.0663263 | 65 |
| V\$ELK1_01    | Elk-1      | ELK1   | 0.0202257 | 63 |
| V\$CIZ_01     | CIZ        | ZNF384 | 0.0830076 | 56 |
| V\$IRF1_Q6_01 | IRF-1      | IRF1   | 0.338402  | 49 |
| V\$CEBPG_Q6   | C/EBPgamma | CEBPG  | 0.547814  | 46 |
| V\$IRF1_Q6    | IRF-1      | IRF1   | 0.338402  | 44 |
| V\$CDP_04     | CDP        | CUX1   | 0.363955  | 38 |
| V\$FOXO4_01   | FOXO4      | FOXO4  | 0.956047  | 35 |
| V\$FOXJ2_02   | FOXJ2      | FOXJ2  | 0.0461565 | 30 |
| V\$TCF4_Q5_01 | TCF-4      | TCF7L2 | 0.46753   | 18 |

hsa-mir-451a

| Matrix_id    | transcription factor | Gene   | PCC        | Occurrence |
|--------------|----------------------|--------|------------|------------|
| V\$PEA3_Q6   | PEA3                 | ETV4   | 0.028152   | 123        |
| V\$PARP_Q4   | PARP                 | PARP1  | 0.00849742 | 120        |
| V\$ELF1_Q6   | Elf-1                | ELF1   | 0.163205   | 119        |
| V\$GKLF_Q4   | GKLF                 | KLF4   | 0.34008    | 118        |
| V\$P300_01   | p300                 | EP300  | 0.211471   | 110        |
| V\$GABPA_Q4  | GABP-alpha           | GABPA  | 0.366636   | 104        |
| V\$TBX5_02   | TBX5                 | TBX5   | 0.00641066 | 101        |
| V\$YY1_01    | YY1                  | YY1    | 0.187438   | 100        |
| V\$GR_Q6     | GR                   | NR3C1  | 0.0228463  | 92         |
| V\$TBX5_01   | TBX5                 | TBX5   | 0.00641066 | 87         |
| V\$YY1_Q6_02 | YY1                  | YY1    | 0.187438   | 87         |
| V\$YY1_Q6    | YY1                  | YY1    | 0.187438   | 86         |
| V\$DLX5_01   | dlx5                 | DLX5   | 0.554156   | 80         |
| V\$PARP_Q3   | PARP                 | PARP1  | 0.00849742 | 80         |
| V\$ING4_01   | ING4                 | ING4   | 0.018751   | 78         |
| V\$GATA2_02  | GATA-2               | GATA2  | 0.52507    | 75         |
| V\$GATA3_01  | GATA-3               | GATA3  | 0.785111   | 73         |
| V\$AHR_Q5    | AhR                  | AHR    | 0.832834   | 71         |
| V\$SREBP1_Q6 | SREBP-1              | SREBF1 | 0.0269049  | 67         |
| V\$HMGY1_01  | HMGY1                | HMGA1  | 0.294189   | 66         |
| V\$GATA2_01  | GATA-2               | GATA2  | 0.52507    | 65         |
| V\$GR_01     | GR                   | NR3C1  | 0.0228463  | 64         |
| V\$YY1_Q6_03 | YY1                  | YY1    | 0.187438   | 63         |
| V\$GATA3_02  | GATA-3               | GATA3  | 0.785111   | 61         |
| V\$ARNT_01   | Arnt                 | ARNT   | 0.196696   | 61         |
| V\$TCF4_01   | TCF-4                | TCF7L2 | 0.222608   | 57         |

|                |            |        |          |    |
|----------------|------------|--------|----------|----|
| V\$CEBPA_Q6    | C/EBPalpha | CEBPA  | 0.10742  | 54 |
| V\$IRF7_Q3     | IRF-7      | IRF7   | 0.140305 | 46 |
| V\$GATA3_Q3    | GATA-3     | GATA3  | 0.785111 | 45 |
| V\$ZABC1_Q1    | ZABC1      | ZNF217 | 0.711344 | 45 |
| V\$PITX2_Q2    | Pitx2      | PITX2  | 0.37737  | 44 |
| V\$PITX2_Q1    | PITX2      | PITX2  | 0.37737  | 40 |
| V\$CEBPB_Q2    | C/EBPbeta  | CEBPB  | 0.520402 | 39 |
| V\$CEBPG_Q6_Q1 | C/EBPgamma | CEBPG  | 0.508837 | 34 |
| V\$IRF1_Q6_Q1  | IRF-1      | IRF1   | 0.28624  | 22 |
| V\$CDP_Q4      | CDP        | CUX1   | 0.193439 | 16 |
| V\$CDP_Q1      | CDP        | CUX1   | 0.193439 | 3  |

hsa-mir-452

| Matrix_id      | transcription factor | Gene  | PCC        | Occurrence |
|----------------|----------------------|-------|------------|------------|
| V\$PEA3_Q6     | PEA3                 | ETV4  | 0.0983111  | 257        |
| V\$PARP_Q4     | PARP                 | PARP1 | 0.0995149  | 254        |
| V\$ELF1_Q6     | Elf-1                | ELF1  | 0.165773   | 249        |
| V\$P300_Q1     | p300                 | EP300 | 0.349573   | 236        |
| V\$ETS1_B      | c-Ets-1              | ETS1  | 0.0679363  | 230        |
| V\$CETS1_Q6    | C-ets-1              | ETS1  | 0.0679363  | 224        |
| V\$SMAD4_Q6_Q1 | Smad4                | SMAD4 | 0.308843   | 223        |
| V\$GABPA_Q4    | GABP-alpha           | GABPA | 0.364776   | 212        |
| V\$TBP_Q6      | TBP                  | TBP   | 0.156746   | 202        |
| V\$TBX5_Q2     | TBX5                 | TBX5  | 0.0788559  | 200        |
| V\$YY1_Q1      | YY1                  | YY1   | 0.367543   | 197        |
| V\$AML1_Q6     | AML1                 | RUNX1 | 0.00174447 | 188        |
| V\$DLX5_Q1     | dlx5                 | DLX5  | 0.691609   | 178        |
| V\$YY1_Q6_Q2   | YY1                  | YY1   | 0.367543   | 176        |
| V\$YY1_Q6      | YY1                  | YY1   | 0.367543   | 176        |
| V\$GATA1_Q2    | GATA-1               | GATA1 | 0.0170848  | 173        |
| V\$AHR_Q5      | AhR                  | AHR   | 0.965365   | 168        |
| V\$GATA1_Q6    | GATA-1               | GATA1 | 0.0170848  | 165        |
| V\$GATA2_Q2    | GATA-2               | GATA2 | 0.695429   | 165        |
| V\$GATA1_Q5    | GATA-1               | GATA1 | 0.0170848  | 165        |
| V\$ERBETA_Q5   | ER-beta              | ESR2  | 0.0421464  | 160        |
| V\$PARP_Q3     | PARP                 | PARP1 | 0.0995149  | 159        |
| V\$GATA1_Q4    | GATA-1               | GATA1 | 0.0170848  | 148        |
| V\$HMGY1_Q1    | HMGY1                | HMGY1 | 0.341965   | 145        |
| V\$GATA3_Q2    | GATA-3               | GATA3 | 0.912183   | 141        |
| V\$GATA3_Q1    | GATA-3               | GATA3 | 0.912183   | 139        |
| V\$YY1_Q6_Q3   | YY1                  | YY1   | 0.367543   | 132        |
| V\$GATA2_Q1    | GATA-2               | GATA2 | 0.695429   | 126        |

|                |            |        |            |     |
|----------------|------------|--------|------------|-----|
| V\$CEBPE_Q6    | CEBPE      | CEBPE  | 0.0285527  | 121 |
| V\$TCF4_01     | TCF-4      | TCF7L2 | 0.46753    | 118 |
| V\$CEBPA_Q6    | C/EBPalpha | CEBPA  | 0.0713893  | 117 |
| V\$TCF4_Q5     | TCF-4      | TCF7L2 | 0.46753    | 111 |
| V\$PITX2_Q2    | Pitx2      | PITX2  | 0.430072   | 111 |
| V\$FOXJ2_01    | FOXJ2      | FOXJ2  | 0.0461565  | 106 |
| V\$AML1_01     | AML1a      | RUNX1  | 0.00174447 | 105 |
| V\$CEBPD_Q6    | C/EBPdelta | CEBPD  | 0.438292   | 98  |
| V\$AML1_Q4     | AML1       | RUNX1  | 0.00174447 | 90  |
| V\$HBP1_Q2     | hbp1       | HBP1   | 0.668623   | 90  |
| V\$CEBPB_02    | C/EBPbeta  | CEBPB  | 0.597165   | 88  |
| V\$CEBPG_Q6_01 | C/EBPgamma | CEBPG  | 0.547814   | 82  |
| V\$GATA2_03    | GATA-2     | GATA2  | 0.695429   | 77  |
| V\$CEBPB_Q6    | C/EBPbeta  | CEBPB  | 0.597165   | 76  |
| V\$YY1_02      | YY1        | YY1    | 0.367543   | 74  |
| V\$CEBPA_01    | C/EBPalpha | CEBPA  | 0.0713893  | 72  |
| V\$YY1_03      | YY1        | YY1    | 0.367543   | 58  |
| V\$IRF1_Q6_01  | IRF-1      | IRF1   | 0.338402   | 49  |
| V\$CEBPG_Q6    | C/EBPgamma | CEBPG  | 0.547814   | 46  |
| V\$CEBPB_01    | C/EBPbeta  | CEBPB  | 0.597165   | 46  |
| V\$CDP_04      | CDP        | CUX1   | 0.363955   | 38  |
| V\$FOXO4_01    | FOXO4      | FOXO4  | 0.956047   | 35  |
| V\$IRF7_01     | IRF-7      | IRF7   | 0.130981   | 31  |
| V\$FOXJ2_02    | FOXJ2      | FOXJ2  | 0.0461565  | 30  |
| V\$IRF2_01     | IRF-2      | IRF2   | 0.072088   | 17  |

hsa-mir-485

| Matrix_id      | transcription factor | Gene   | PCC        | Occurrence |
|----------------|----------------------|--------|------------|------------|
| V\$PUR1_Q4     | PUR1                 | PURA   | 0.183734   | 21         |
| V\$MAFB_01     | MAFB                 | MAFB   | 0.0816709  | 21         |
| V\$P300_01     | p300                 | EP300  | 0.0146241  | 20         |
| V\$PARP_Q4     | PARP                 | PARP1  | 0.285893   | 20         |
| V\$GABPA_Q4    | GABP-alpha           | GABPA  | 0.18758    | 17         |
| V\$AP4_Q6_02   | AP-4                 | TFAP4  | 0.114852   | 16         |
| V\$NR1B2_Q6    | NR1B2                | RARB   | 0.00132639 | 16         |
| V\$SOX9_Q4     | SOX9                 | SOX9   | 0.0353639  | 15         |
| V\$YY1_Q6      | YY1                  | YY1    | 0.201268   | 15         |
| V\$YY1_Q6_02   | YY1                  | YY1    | 0.201268   | 14         |
| V\$HNF4A_Q6_01 | HNF-4alpha           | HNF4A  | 0.106423   | 14         |
| V\$YY1_01      | YY1                  | YY1    | 0.201268   | 14         |
| V\$GATA3_01    | GATA-3               | GATA3  | 0.11806    | 14         |
| V\$AP2ALPHA_Q6 | AP-2alpha            | TFAP2A | 0.151577   | 13         |

|                |           |         |           |    |
|----------------|-----------|---------|-----------|----|
| V\$AHR_Q5      | AhR       | AHR     | 0.123682  | 13 |
| V\$ING4_01     | ING4      | ING4    | 0.267673  | 12 |
| V\$CREM_Q6     | CREM      | CREM    | 0.4933    | 12 |
| V\$PBX1_04     | Pbx1      | PBX1    | 0.293788  | 12 |
| V\$PIT1_Q6     | Pit-1     | POU1F1  | 0.247375  | 11 |
| V\$SOX10_Q6    | SOX10     | SOX10   | 0.312386  | 10 |
| V\$GABPBETA_Q3 | GABP-beta | GABPB1  | 0.0377907 | 9  |
| V\$ATF4_Q6     | ATF-4     | ATF4    | 0.0826135 | 8  |
| V\$MAFK_Q3     | MafK      | MAFK    | 0.160717  | 6  |
| V\$OC2_Q3      | OC-2      | ONECUT2 | 0.0852206 | 5  |
| V\$CEBPB_02    | C/EBPbeta | CEBPB   | 0.120719  | 5  |
| V\$SOX2_Q6     | SOX2      | SOX2    | 0.0667337 | 4  |
| V\$YY1_02      | YY1       | YY1     | 0.201268  | 4  |
| V\$AP4_01      | AP-4      | TFAP4   | 0.114852  | 4  |
| V\$ELK1_01     | Elk-1     | ELK1    | 0.267713  | 3  |
| V\$POU3F2_02   | POU3F2    | POU3F2  | 0.0243298 | 1  |

hsa-mir-489

| Matrix_id      | transcription factor | Gene   | PCC        | Occurrence |
|----------------|----------------------|--------|------------|------------|
| V\$PUR1_Q4     | PUR1                 | PURA   | 0.301679   | 186        |
| V\$PEA3_Q6     | PEA3                 | ETV4   | 0.361981   | 185        |
| V\$IK_Q5       | Ikaros               | IKZF1  | 0.18795    | 183        |
| V\$GKLF_Q4     | GKLF                 | KLF4   | 0.359224   | 180        |
| V\$ELF1_Q6     | Elf-1                | ELF1   | 0.141051   | 178        |
| V\$AP2REP_01   | AP-2rep              | KLF12  | 0.219215   | 176        |
| V\$ZIC3_01     | Zic3                 | ZIC3   | 0.324106   | 170        |
| V\$ETS1_B      | c-Ets-1              | ETS1   | 0.249833   | 170        |
| V\$P300_01     | p300                 | EP300  | 0.615159   | 168        |
| V\$MAFB_01     | MAFB                 | MAFB   | 0.180416   | 168        |
| V\$CETS1_Q6    | C-ets-1              | ETS1   | 0.249833   | 164        |
| V\$GATA1_01    | GATA-1               | GATA1  | 0.0604924  | 160        |
| V\$SMAD4_Q6_01 | Smad4                | SMAD4  | 0.527986   | 160        |
| V\$NR1B2_Q6    | NR1B2                | RARB   | 0.339113   | 158        |
| V\$GABPA_Q4    | GABP-alpha           | GABPA  | 0.482463   | 156        |
| V\$NFAT4_Q3    | NF-AT4               | NFATC3 | 0.176606   | 153        |
| V\$ETS2_Q6     | c-Ets-2              | ETS2   | 0.173266   | 151        |
| V\$Elf5_Q3     | ELF5                 | ELF5   | 0.00485435 | 151        |
| V\$ETS2_B      | c-Ets-2              | ETS2   | 0.173266   | 147        |
| V\$AML1_Q6     | AML1                 | RUNX1  | 0.213501   | 145        |
| V\$TBX5_02     | TBX5                 | TBX5   | 0.325125   | 144        |
| V\$SMAD3_Q6_01 | Smad3                | SMAD3  | 0.324383   | 144        |
| V\$GR_Q6       | GR                   | NR3C1  | 0.421081   | 144        |

|                |           |          |            |     |
|----------------|-----------|----------|------------|-----|
| V\$YY1_01      | YY1       | YY1      | 0.400262   | 142 |
| V\$AP4_Q6_02   | AP-4      | TFAP4    | 0.203886   | 130 |
| V\$YY1_Q6      | YY1       | YY1      | 0.400262   | 127 |
| V\$YY1_Q6_02   | YY1       | YY1      | 0.400262   | 127 |
| V\$SOX5_01     | SOX5      | SOX5     | 0.202029   | 126 |
| V\$ING4_01     | ING4      | ING4     | 0.125499   | 123 |
| V\$NKX32_01    | Nkx3-2    | NKX3-2   | 0.184541   | 122 |
| V\$AHR_Q5      | AhR       | AHR      | 0.722359   | 120 |
| V\$LRF_Q2      | LRF       | ZBTB7A   | 0.327999   | 119 |
| V\$PARP_Q3     | PARP      | PARP1    | 0.335005   | 119 |
| V\$MAZ_Q6      | MAZ       | MAZ      | 0.130453   | 117 |
| V\$TBX5_01     | TBX5      | TBX5     | 0.325125   | 117 |
| V\$ERBETA_Q5   | ER-beta   | ESR2     | 0.373296   | 116 |
| V\$BEN_01      | BEN       | GTF2IRD1 | 0.272587   | 113 |
| V\$SP1_Q6      | Sp1       | SP1      | 0.51601    | 113 |
| V\$AP2ALPHA_Q6 | AP-2alpha | TFAP2A   | 0.870528   | 105 |
| V\$HNF3A_01    | HNF3A     | FOXA1    | 0.0335661  | 105 |
| V\$E2A_Q6      | E2A       | TCF3     | 0.243207   | 105 |
| V\$MYOGENIN_Q6 | myogenin  | MYOG     | 0.346926   | 105 |
| V\$E12_Q6      | E12       | TCF3     | 0.243207   | 105 |
| V\$ZBP89_Q4    | ZBP89     | ZNF148   | 0.108967   | 104 |
| V\$MYOD_Q6_01  | MyoD      | MYOD1    | 0.211189   | 103 |
| V\$E47_02      | E47       | TCF3     | 0.243207   | 103 |
| V\$FKLF_Q5     | FKLF      | KLF11    | 0.20559    | 102 |
| V\$NFAT2_Q5    | NF-AT2    | NFATC1   | 0.17979    | 100 |
| V\$AP2ALPHA_01 | AP-2alpha | TFAP2A   | 0.870528   | 98  |
| V\$SREBP1_Q6   | SREBP-1   | SREBF1   | 0.0538091  | 96  |
| V\$TFIIQ6      | TFII-I    | GTF2I    | 0.379764   | 96  |
| V\$SP1_Q6_01   | Sp1       | SP1      | 0.51601    | 95  |
| V\$TEL1_02     | TEL1      | ETV6     | 0.267939   | 94  |
| V\$ELK1_02     | Elk-1     | ELK1     | 0.336991   | 94  |
| V\$AP4_Q5      | AP-4      | TFAP4    | 0.203886   | 92  |
| V\$SP1_Q4_01   | Sp1       | SP1      | 0.51601    | 92  |
| V\$SP1_02      | SP1       | SP1      | 0.51601    | 90  |
| V\$CMAF_01     | c-Maf     | MAF      | 0.603482   | 89  |
| V\$TEF1_Q6_03  | TEF-1     | TEAD1    | 0.314448   | 89  |
| V\$E2A_Q2      | E2A       | TCF3     | 0.243207   | 88  |
| V\$ETV3_02     | ETV3      | ETV3     | 0.0134195  | 88  |
| V\$GR_01       | GR        | NR3C1    | 0.421081   | 86  |
| V\$WT1_Q6_01   | WT1       | WT1      | 0.07186    | 86  |
| V\$TEF1_Q6     | TEF-1     | TEAD1    | 0.314448   | 86  |
| V\$ER71_02     | ER71      | ETV2     | 0.198968   | 86  |
| V\$ELF5_01     | ELF5      | ELF5     | 0.00485435 | 86  |
| V\$ELK1_06     | ELK-1     | ELK1     | 0.336991   | 86  |
| V\$AP4_Q6      | AP-4      | TFAP4    | 0.203886   | 83  |
| V\$ETV7_01     | ETV7      | ETV7     | 0.349655   | 82  |

|                     |                      |          |           |    |
|---------------------|----------------------|----------|-----------|----|
| V\$KLF15_Q2         | KLF15                | KLF15    | 0.0133101 | 76 |
| V\$DAX1_01          | Dax1                 | NR0B1    | 0.13156   | 76 |
| V\$ESE1_Q3          | ESE-1                | ELF3     | 0.300406  | 75 |
| V\$MYOGENIN_Q6_01   | myogenin             | MYOG     | 0.346926  | 74 |
| V\$EHF_03           | EHF                  | EHF      | 0.0567966 | 71 |
| V\$ERF_02           | ERF                  | ERF      | 0.011515  | 70 |
| V\$SP2_01           | SP2                  | SP2      | 0.312155  | 70 |
| V\$CEBPD_Q6         | C/EBPdelta           | CEBPD    | 0.37357   | 68 |
| V\$AP2BETA_Q3       | AP-2beta             | TFAP2B   | 0.358305  | 68 |
| V\$MYOD_Q6          | MyoD                 | MYOD1    | 0.211189  | 67 |
| V\$VDR_Q3           | VDR                  | VDR      | 0.325361  | 65 |
| V\$E47_01           | E47                  | TCF3     | 0.243207  | 64 |
| V\$MATH1_Q2         | MATH1                | ATOH1    | 0.241646  | 60 |
| V\$PAX8_01          | Pax-8                | PAX8     | 0.118261  | 60 |
| V\$MYOD_Q6_02       | MyoD                 | MYOD1    | 0.211189  | 56 |
| V\$ESE1_02          | ESE-1                | ELF3     | 0.300406  | 55 |
| V\$STAT3_03         | STAT3                | STAT3    | 0.548029  | 53 |
| V\$CACCCBINDINGFACT | CACCC-binding factor | ZNF148   | 0.108967  | 53 |
| V\$YY1_02           | YY1                  | YY1      | 0.400262  | 51 |
| V\$E2F4_Q6          | E2F-4                | E2F4     | 0.363932  | 48 |
| V\$MYOD_01          | MyoD                 | MYOD1    | 0.211189  | 48 |
| V\$PET1_02          | Pet-1                | FEV      | 0.0953682 | 46 |
| V\$ERG_03           | ERG                  | ERG      | 0.670624  | 43 |
| V\$AP4_01           | AP-4                 | TFAP4    | 0.203886  | 40 |
| V\$EGR2_01          | Egr-2                | EGR2     | 0.030369  | 34 |
| V\$HTF4_Q2          | HTF4                 | TCF12    | 0.151298  | 34 |
| V\$ERG_01           | ERG                  | ERG      | 0.670624  | 33 |
| V\$EKLF_Q5          | EKLF                 | KLF1     | 0.281594  | 33 |
| V\$BEN_02           | BEN                  | GTF2IRD1 | 0.272587  | 23 |
| V\$SREBP1_02        | SREBP-1              | SREBF1   | 0.0538091 | 23 |
| V\$MAFK_Q3          | MafK                 | MAFK     | 0.392057  | 22 |
| V\$NANOG_01         | Nanog                | NANOG    | 0.257987  | 22 |
| V\$CTCF_02          | CTCF                 | CTCF     | 0.209937  | 18 |
| V\$CTCF_01          | CTCF                 | CTCF     | 0.209937  | 12 |
| V\$GRE_C            | GR                   | NR3C1    | 0.421081  | 11 |

hsa-mir-490

| Matrix_id    | transcription factor | Gene  | PCC      | Occurrence |
|--------------|----------------------|-------|----------|------------|
| V\$AP2REP_01 | AP-2rep              | KLF12 | 0.15918  | 104        |
| V\$ZIC3_01   | Zic3                 | ZIC3  | 0.214602 | 99         |
| V\$GATA1_01  | GATA-1               | GATA1 | 0.657181 | 91         |
| V\$TBP_Q6    | TBP                  | TBP   | 0.128643 | 86         |

|                |            |        |            |    |
|----------------|------------|--------|------------|----|
| V\$NR1B2_Q6    | NR1B2      | RARB   | 0.26815    | 85 |
| V\$HNF4A_Q6_01 | HNF-4alpha | HNF4A  | 0.310489   | 77 |
| V\$SOX5_01     | SOX5       | SOX5   | 0.111082   | 73 |
| V\$GATA1_02    | GATA-1     | GATA1  | 0.657181   | 71 |
| V\$E2A_Q6      | E2A        | TCF3   | 0.152616   | 67 |
| V\$E47_02      | E47        | TCF3   | 0.152616   | 67 |
| V\$E12_Q6      | E12        | TCF3   | 0.152616   | 67 |
| V\$NFAT2_Q5    | NF-AT2     | NFATC1 | 0.176785   | 64 |
| V\$IPF1_Q6     | IPF1       | PDX1   | 0.120426   | 64 |
| V\$GATA1_04    | GATA-1     | GATA1  | 0.657181   | 61 |
| V\$IPF1_Q4_01  | IPF1       | PDX1   | 0.120426   | 61 |
| V\$IPF1_01     | IPF1       | PDX1   | 0.120426   | 59 |
| V\$CRX_Q4      | Crx        | CRX    | 0.149663   | 53 |
| V\$IRF4_Q6     | IRF-4      | IRF4   | 0.106713   | 52 |
| V\$CRX_02      | Crx        | CRX    | 0.149663   | 49 |
| V\$IRF7_Q3     | IRF-7      | IRF7   | 0.391912   | 45 |
| V\$GFI1_Q6_01  | Gfi1       | GFI1   | 0.143232   | 44 |
| V\$GFI1_Q6     | Gfi1       | GFI1   | 0.143232   | 43 |
| V\$FOXJ2_01    | FOXJ2      | FOXJ2  | 0.0108751  | 41 |
| V\$FOXP3_01    | FOXP3      | FOXP3  | 0.0244998  | 39 |
| V\$CRX_Q4_01   | CRX        | CRX    | 0.149663   | 38 |
| V\$CEBPE_Q6    | CEBPE      | CEBPE  | 0.883683   | 36 |
| V\$GFI1B_01    | Gfi1b      | GFI1B  | 0.227485   | 36 |
| V\$STAT3_03    | STAT3      | STAT3  | 0.004889   | 34 |
| V\$P53_02      | p53        | TP53   | 0.05944    | 33 |
| V\$FOXO4_02    | FOXO4      | FOXO4  | 0.00643233 | 32 |
| V\$IPF1_02     | IPF1       | PDX1   | 0.120426   | 25 |
| V\$E2F1_Q4     | E2F-1      | E2F1   | 0.107374   | 19 |
| V\$FOXO4_01    | FOXO4      | FOXO4  | 0.00643233 | 13 |
| V\$IRF3_Q3     | IRF-3      | IRF3   | 0.131933   | 5  |

hsa-mir-491

| Matrix_id      | transcription factor | Gene  | PCC      | Occurrence |
|----------------|----------------------|-------|----------|------------|
| V\$PUR1_Q4     | PUR1                 | PURA  | 0.372872 | 75         |
| V\$IK_Q5       | Ikaros               | IKZF1 | 0.192787 | 73         |
| V\$AP2REP_01   | AP-2rep              | KLF12 | 0.33799  | 70         |
| V\$PEA3_Q6     | PEA3                 | ETV4  | 0.208569 | 69         |
| V\$ZIC3_01     | Zic3                 | ZIC3  | 0.336089 | 67         |
| V\$NR1B2_Q6    | NR1B2                | RARB  | 0.385186 | 66         |
| V\$PARP_Q4     | PARP                 | PARP1 | 0.596644 | 66         |
| V\$ETS2_Q6     | c-Ets-2              | ETS2  | 0.335067 | 64         |
| V\$SMAD4_Q6_01 | Smad4                | SMAD4 | 0.121462 | 63         |



|                |            |        |           |    |
|----------------|------------|--------|-----------|----|
| V\$ETS1_B      | c-Ets-1    | ETS1   | 0.166814  | 62 |
| V\$CETS1_Q6    | C-ets-1    | ETS1   | 0.166814  | 61 |
| V\$TBX5_Q2     | TBX5       | TBX5   | 0.295808  | 60 |
| V\$SOX9_Q4     | SOX9       | SOX9   | 0.151088  | 59 |
| V\$LRF_Q2      | LRF        | ZBTB7A | 0.316067  | 59 |
| V\$GATA1_Q1    | GATA-1     | GATA1  | 0.232038  | 57 |
| V\$TBP_Q6      | TBP        | TBP    | 0.212651  | 56 |
| V\$GR_Q6       | GR         | NR3C1  | 0.173022  | 56 |
| V\$CDX2_Q5_Q2  | CDX-2      | CDX2   | 0.275298  | 56 |
| V\$SMAD3_Q6_Q1 | Smad3      | SMAD3  | 0.135857  | 56 |
| V\$ETS2_B      | c-Ets-2    | ETS2   | 0.335067  | 55 |
| V\$AML1_Q6     | AML1       | RUNX1  | 0.281284  | 55 |
| V\$AP4_Q6_Q2   | AP-4       | TFAP4  | 0.471519  | 54 |
| V\$YY1_Q1      | YY1        | YY1    | 0.0762335 | 52 |
| V\$YY1_Q6      | YY1        | YY1    | 0.0762335 | 51 |
| V\$SP1_Q6_Q1   | Sp1        | SP1    | 0.328837  | 50 |
| V\$HNF4A_Q6_Q1 | HNF-4alpha | HNF4A  | 0.250728  | 49 |
| V\$ERBETA_Q5   | ER-beta    | ESR2   | 0.163482  | 48 |
| V\$SP1_Q2_Q1   | Sp1        | SP1    | 0.328837  | 48 |
| V\$NANOG_Q2    | Nanog      | NANOG  | 0.230193  | 47 |
| V\$TBX5_Q1     | TBX5       | TBX5   | 0.295808  | 47 |
| V\$YY1_Q6_Q2   | YY1        | YY1    | 0.0762335 | 47 |
| V\$MAZ_Q6_Q1   | MAZ        | MAZ    | 0.332684  | 46 |
| V\$ING4_Q1     | ING4       | ING4   | 0.484665  | 46 |
| V\$DLX5_Q1     | dlx5       | DLX5   | 0.136829  | 46 |
| V\$GATA6_Q1    | GATA-6     | GATA6  | 0.290387  | 45 |
| V\$IPF1_Q1     | IPF1       | PDX1   | 0.317745  | 45 |
| V\$GATA1_Q5    | GATA-1     | GATA1  | 0.232038  | 45 |
| V\$GATA1_Q6    | GATA-1     | GATA1  | 0.232038  | 45 |
| V\$ELK1_Q2     | Elk-1      | ELK1   | 0.568764  | 44 |
| V\$TEL1_Q2     | TEL1       | ETV6   | 0.272595  | 44 |
| V\$AML2_Q3     | AML2       | RUNX3  | 0.0817732 | 44 |
| V\$ETV3_Q2     | ETV3       | ETV3   | 0.273746  | 43 |
| V\$PARP_Q3     | PARP       | PARP1  | 0.596644  | 41 |
| V\$NKX32_Q1    | Nkx3-2     | NKX3-2 | 0.250202  | 41 |
| V\$GATA1_Q2    | GATA-1     | GATA1  | 0.232038  | 40 |
| V\$ER71_Q2     | ER71       | ETV2   | 0.258937  | 40 |
| V\$IRF8_Q6     | IRF-8      | IRF8   | 0.0960786 | 39 |
| V\$HIF1A_Q6    | HIF-1alpha | HIF1A  | 0.135983  | 37 |
| V\$ELK1_Q6     | ELK-1      | ELK1   | 0.568764  | 37 |
| V\$ARNT_Q1     | Arnt       | ARNT   | 0.230308  | 37 |
| V\$FOXO3A_Q1   | FOXO3A     | FOXO3  | 0.183346  | 36 |
| V\$SMAD3_Q6    | SMAD3      | SMAD3  | 0.135857  | 36 |
| V\$AML1_Q1     | AML1a      | RUNX1  | 0.281284  | 35 |
| V\$SOX10_Q6    | SOX10      | SOX10  | 0.687805  | 35 |
| V\$HNF3B_Q6    | HNF-3beta  | FOXA2  | 0.15145   | 34 |

|                   |          |               |           |    |
|-------------------|----------|---------------|-----------|----|
| V\$PBX1_Q3        | Pbx1     | PBX1          | 0.0704719 | 34 |
| V\$HNF3A_01       | HNF3A    | FOXA1         | 0.0185626 | 34 |
| V\$NEUROD_02      | NeuroD   | NEUROD1       | 0.389107  | 33 |
| V\$AML2_Q3_01     | AML2     | RUNX3         | 0.0817732 | 33 |
| V\$AP4_Q5         | AP-4     | TFAP4         | 0.471519  | 33 |
| V\$FOXJ2_01       | FOXJ2    | FOXJ2         | 0.335192  | 32 |
| V\$NFAT2_Q5       | NF-AT2   | NFATC1        | 0.285079  | 32 |
| V\$TCF3_01        | TCF-3    | TCF7L1        | 0.0464049 | 32 |
| V\$AML1_Q4        | AML1     | RUNX1         | 0.281284  | 31 |
| V\$GATA1_04       | GATA-1   | GATA1         | 0.232038  | 31 |
| V\$GR_01          | GR       | NR3C1         | 0.173022  | 30 |
| V\$CP2_01         | CP2      | TFCP2         | 0.350683  | 29 |
| V\$PBX1_04        | Pbx1     | PBX1          | 0.0704719 | 27 |
| V\$BCL6_Q3_01     | Bcl-6    | BCL6          | 0.29389   | 27 |
| V\$FOXP3_01       | FOXP3    | FOXP3         | 0.292759  | 26 |
| V\$NKX32_02       | Nkx3-2   | NKX3-2        | 0.250202  | 25 |
| V\$AP4_Q6         | AP-4     | TFAP4         | 0.471519  | 25 |
| V\$YY1_02         | YY1      | YY1           | 0.0762335 | 24 |
| V\$AML2_01        | AML2     | RUNX3         | 0.0817732 | 23 |
| V\$MYOGENIN_Q6_01 | myogenin | MYOG          | 0.234835  | 23 |
| V\$SPIB_03        | Spi-B    | SPIB          | 0.217552  | 23 |
| V\$MATH1_Q2       | MATH1    | ATOH1         | 0.242766  | 21 |
| V\$NKX2B_Q3       | NKX2B    | NKX2-2        | 0.765307  | 19 |
| V\$DEC2_Q2        |          | 2-Dec BHLHE41 | 0.322688  | 18 |
| V\$NKX22_02       | NKX2B    | NKX2-2        | 0.765307  | 18 |
| V\$AP4_01         | AP-4     | TFAP4         | 0.471519  | 15 |
| V\$STAF_02        | Staf     | ZNF143        | 0.211401  | 15 |
| V\$CIZ_01         | CIZ      | ZNF384        | 0.315416  | 14 |
| V\$AP4_Q6_01      | AP-4     | TFAP4         | 0.471519  | 14 |
| V\$MITF_Q6        | MITF     | MITF          | 0.105988  | 14 |
| V\$HOXA7_01       | HOXA7    | HOXA7         | 0.149293  | 5  |

hsa-mir-493

| Matrix_id      | transcription factor | Gene  | PCC       | Occurrence |
|----------------|----------------------|-------|-----------|------------|
| V\$PUR1_Q4     | PUR1                 | PURA  | 0.0893183 | 180        |
| V\$PEA3_Q6     | PEA3                 | ETV4  | 0.104051  | 177        |
| V\$PARP_Q4     | PARP                 | PARP1 | 0.0672683 | 174        |
| V\$ELF1_Q6     | Elf-1                | ELF1  | 0.109873  | 173        |
| V\$GKLF_Q4     | GKLF                 | KLF4  | 0.461413  | 169        |
| V\$MAFB_01     | MAFB                 | MAFB  | 0.206165  | 167        |
| V\$P300_01     | p300                 | EP300 | 0.270143  | 162        |
| V\$SMAD4_Q6_01 | Smad4                | SMAD4 | 0.196196  | 154        |

|                |            |        |            |     |
|----------------|------------|--------|------------|-----|
| V\$GABPA_Q4    | GABP-alpha | GABPA  | 0.340139   | 149 |
| V\$TBP_Q6      | TBP        | TBP    | 0.0875786  | 137 |
| V\$GR_Q6       | GR         | NR3C1  | 0.0652598  | 136 |
| V\$YY1_01      | YY1        | YY1    | 0.322781   | 135 |
| V\$YY1_Q6      | YY1        | YY1    | 0.322781   | 126 |
| V\$YY1_Q6_02   | YY1        | YY1    | 0.322781   | 125 |
| V\$PARP_Q3     | PARP       | PARP1  | 0.0672683  | 116 |
| V\$ERBETA_Q5   | ER-beta    | ESR2   | 0.0103181  | 112 |
| V\$AHR_Q5      | AhR        | AHR    | 0.842406   | 110 |
| V\$AP2ALPHA_Q6 | AP-2alpha  | TFAP2A | 0.855177   | 107 |
| V\$FKLF_Q5     | FKLF       | KLF11  | 0.259522   | 105 |
| V\$SP1_Q6      | Sp1        | SP1    | 0.288308   | 105 |
| V\$PITX3_Q2    | PITX3      | PITX3  | 0.076534   | 97  |
| V\$AP2ALPHA_01 | AP-2alpha  | TFAP2A | 0.855177   | 96  |
| V\$PBX1_Q3     | Pbx1       | PBX1   | 0.00229058 | 96  |
| V\$SREBP1_Q6   | SREBP-1    | SREBF1 | 0.434436   | 94  |
| V\$ELK1_02     | Elk-1      | ELK1   | 0.0879281  | 85  |
| V\$CEBPE_Q6    | CEBPE      | CEBPE  | 0.00664291 | 80  |
| V\$ELK1_06     | ELK-1      | ELK1   | 0.0879281  | 77  |
| V\$CEBPA_Q6    | C/EBPalpha | CEBPA  | 0.0187781  | 77  |
| V\$TCF4_01     | TCF-4      | TCF7L2 | 0.347641   | 76  |
| V\$TCF4_Q5     | TCF-4      | TCF7L2 | 0.347641   | 74  |
| V\$CP2_01      | CP2        | TFCP2  | 0.59812    | 73  |
| V\$CREM_Q6     | CREM       | CREM   | 0.331846   | 72  |
| V\$ESE1_Q3     | ESE-1      | ELF3   | 0.0967427  | 71  |
| V\$PITX2_Q2    | Pitx2      | PITX2  | 0.37631    | 69  |
| V\$GABPBETA_Q3 | GABP-beta  | GABPB1 | 0.169096   | 68  |
| V\$ZABC1_01    | ZABC1      | ZNF217 | 0.724792   | 65  |
| V\$PITX2_01    | PITX2      | PITX2  | 0.37631    | 64  |
| V\$CEBPD_Q6    | C/EBPdelta | CEBPD  | 0.356791   | 59  |
| V\$CNOT3_01    | CNOT3      | CNOT3  | 0.119487   | 58  |
| V\$YY1_02      | YY1        | YY1    | 0.322781   | 56  |
| V\$CEBPB_02    | C/EBPbeta  | CEBPB  | 0.559343   | 55  |
| V\$STAT3_03    | STAT3      | STAT3  | 0.188556   | 55  |
| V\$ATF3_Q6_01  | ATF-3      | ATF3   | 0.520233   | 53  |
| V\$P53_02      | p53        | TP53   | 0.500253   | 53  |
| V\$ESE1_02     | ESE-1      | ELF3   | 0.0967427  | 53  |
| V\$EAR2_Q2     | EAR2       | NR2F6  | 0.402434   | 50  |
| V\$CIZ_01      | CIZ        | ZNF384 | 0.184718   | 46  |
| V\$CEBPB_Q6    | C/EBPbeta  | CEBPB  | 0.559343   | 44  |
| V\$CEBPA_01    | C/EBPalpha | CEBPA  | 0.0187781  | 43  |
| V\$ERG_03      | ERG        | ERG    | 0.264218   | 41  |
| V\$ATF4_Q6     | ATF-4      | ATF4   | 0.0758398  | 40  |
| V\$SMAD4_Q6    | SMAD4      | SMAD4  | 0.196196   | 32  |
| V\$AP2ALPHA_02 | AP-2alphaA | TFAP2A | 0.855177   | 27  |
| V\$ERM_02      | Erm        | ETV5   | 0.665003   | 27  |

|              |         |        |          |    |
|--------------|---------|--------|----------|----|
| V\$SREBP1_Q2 | SREBP-1 | SREBF1 | 0.434436 | 20 |
|--------------|---------|--------|----------|----|

hsa-mir-494

| Matrix_id      | transcription factor | Gene    | PCC        | Occurrence |
|----------------|----------------------|---------|------------|------------|
| V\$GKLF_Q4     | GKLF                 | KLF4    | 0.0650543  | 31         |
| V\$P300_Q1     | p300                 | EP300   | 0.00936063 | 30         |
| V\$PEA3_Q6     | PEA3                 | ETV4    | 0.0662351  | 30         |
| V\$GABPA_Q4    | GABP-alpha           | GABPA   | 0.134904   | 27         |
| V\$YY1_Q6_Q2   | YY1                  | YY1     | 0.100715   | 25         |
| V\$HNF4A_Q6_Q1 | HNF-4alpha           | HNF4A   | 0.075898   | 25         |
| V\$YY1_Q6      | YY1                  | YY1     | 0.100715   | 25         |
| V\$YY1_Q1      | YY1                  | YY1     | 0.100715   | 25         |
| V\$GATA3_Q1    | GATA-3               | GATA3   | 0.233176   | 22         |
| V\$AP2ALPHA_Q6 | AP-2alpha            | TFAP2A  | 0.269761   | 19         |
| V\$PBX1_Q4     | Pbx1                 | PBX1    | 0.154179   | 19         |
| V\$GATA2_Q1    | GATA-2               | GATA2   | 0.0700902  | 19         |
| V\$AHR_Q5      | AhR                  | AHR     | 0.229793   | 18         |
| V\$CREM_Q6     | CREM                 | CREM    | 0.458207   | 14         |
| V\$FOXP3_Q1    | FOXP3                | FOXP3   | 0.00558172 | 12         |
| V\$ATF3_Q6_Q1  | ATF-3                | ATF3    | 0.0810135  | 12         |
| V\$YY1_Q2      | YY1                  | YY1     | 0.100715   | 12         |
| V\$ATF4_Q6     | ATF-4                | ATF4    | 0.0555603  | 11         |
| V\$CEBPB_Q2    | C/EBPbeta            | CEBPB   | 0.23209    | 11         |
| V\$PIT1_Q6     | Pit-1                | POU1F1  | 0.276984   | 11         |
| V\$MAFK_Q3     | MafK                 | MAFK    | 0.311624   | 9          |
| V\$ELK1_Q1     | Elk-1                | ELK1    | 0.169856   | 6          |
| V\$OC2_Q3      | OC-2                 | ONECUT2 | 0.0761184  | 6          |

hsa-mir-495

| Matrix_id      | transcription factor | Gene  | PCC       | Occurrence |
|----------------|----------------------|-------|-----------|------------|
| V\$PUR1_Q4     | PUR1                 | PURA  | 0.123894  | 114        |
| V\$PARP_Q4     | PARP                 | PARP1 | 0.120403  | 111        |
| V\$ELF1_Q6     | Elf-1                | ELF1  | 0.0711661 | 111        |
| V\$PEA3_Q6     | PEA3                 | ETV4  | 0.0773785 | 111        |
| V\$GKLF_Q4     | GKLF                 | KLF4  | 0.397486  | 108        |
| V\$MAFB_Q1     | MAFB                 | MAFB  | 0.202865  | 106        |
| V\$SMAD4_Q6_Q1 | Smad4                | SMAD4 | 0.152645  | 102        |
| V\$P300_Q1     | p300                 | EP300 | 0.239312  | 100        |

|                |            |        |           |    |
|----------------|------------|--------|-----------|----|
| V\$GABPA_Q4    | GABP-alpha | GABPA  | 0.339167  | 92 |
| V\$YY1_01      | YY1        | YY1    | 0.323929  | 90 |
| V\$GR_Q6       | GR         | NR3C1  | 0.051421  | 89 |
| V\$YY1_Q6_02   | YY1        | YY1    | 0.323929  | 82 |
| V\$YY1_Q6      | YY1        | YY1    | 0.323929  | 80 |
| V\$ING4_01     | ING4       | ING4   | 0.0441198 | 69 |
| V\$AHR_Q5      | AhR        | AHR    | 0.76656   | 68 |
| V\$AP2ALPHA_Q6 | AP-2alpha  | TFAP2A | 0.782516  | 67 |
| V\$GATA3_01    | GATA-3     | GATA3  | 0.729031  | 67 |
| V\$GR_01       | GR         | NR3C1  | 0.051421  | 62 |
| V\$GATA2_01    | GATA-2     | GATA2  | 0.491094  | 62 |
| V\$PBX1_04     | Pbx1       | PBX1   | 0.0664494 | 58 |
| V\$TCF4_01     | TCF-4      | TCF7L2 | 0.291219  | 52 |
| V\$CREM_Q6     | CREM       | CREM   | 0.385604  | 49 |
| V\$PIT1_Q6     | Pit-1      | POU1F1 | 0.0117583 | 41 |
| V\$YY1_02      | YY1        | YY1    | 0.323929  | 41 |
| V\$GABPBETA_Q3 | GABP-beta  | GABPB1 | 0.153601  | 40 |
| V\$CEBPB_02    | C/EBPbeta  | CEBPB  | 0.516703  | 34 |
| V\$ATF3_Q6_01  | ATF-3      | ATF3   | 0.437817  | 34 |
| V\$ELK1_01     | Elk-1      | ELK1   | 0.129753  | 29 |
| V\$ATF4_Q6     | ATF-4      | ATF4   | 0.0853371 | 28 |
| V\$SMAD4_Q6    | SMAD4      | SMAD4  | 0.152645  | 20 |
| V\$MAFK_Q3     | MafK       | MAFK   | 0.340169  | 16 |

hsa-mir-500a

| Matrix_id      | transcription factor | Gene  | PCC       | Occurrence |
|----------------|----------------------|-------|-----------|------------|
| V\$PUR1_Q4     | PUR1                 | PURA  | 0.132303  | 32         |
| V\$GKLF_Q4     | GKLF                 | KLF4  | 0.232327  | 31         |
| V\$PARP_Q4     | PARP                 | PARP1 | 0.0871839 | 31         |
| V\$P300_01     | p300                 | EP300 | 0.295486  | 30         |
| V\$MAFB_01     | MAFB                 | MAFB  | 0.189739  | 30         |
| V\$SMAD4_Q6_01 | Smad4                | SMAD4 | 0.232933  | 29         |
| V\$ELF1_Q6     | Elf-1                | ELF1  | 0.204915  | 29         |
| V\$YY1_01      | YY1                  | YY1   | 0.191736  | 28         |
| V\$ZIC3_01     | Zic3                 | ZIC3  | 0.40935   | 27         |
| V\$TBP_Q6      | TBP                  | TBP   | 0.106919  | 27         |
| V\$CDX2_Q5_02  | CDX-2                | CDX2  | 0.0315046 | 27         |
| V\$SMAD3_Q6_01 | Smad3                | SMAD3 | 0.0776807 | 26         |
| V\$NR1B2_Q6    | NR1B2                | RARB  | 0.178504  | 26         |
| V\$GR_Q6       | GR                   | NR3C1 | 0.173327  | 25         |
| V\$TBX5_02     | TBX5                 | TBX5  | 0.0233848 | 24         |
| V\$AP4_Q6_02   | AP-4                 | TFAP4 | 0.0908161 | 24         |

|                |            |        |           |    |
|----------------|------------|--------|-----------|----|
| V\$YY1_Q6      | YY1        | YY1    | 0.191736  | 24 |
| V\$YY1_Q6_02   | YY1        | YY1    | 0.191736  | 24 |
| V\$HNF4A_Q6_01 | HNF-4alpha | HNF4A  | 0.359395  | 24 |
| V\$CRX_Q4      | Crx        | CRX    | 0.184091  | 23 |
| V\$IPF1_Q4_01  | IPF1       | PDX1   | 0.025169  | 23 |
| V\$CDX2_Q5_01  | Cdx-2      | CDX2   | 0.0315046 | 23 |
| V\$IPF1_Q6     | IPF1       | PDX1   | 0.025169  | 23 |
| V\$SOX5_01     | SOX5       | SOX5   | 0.111776  | 22 |
| V\$SP1_Q6      | Sp1        | SP1    | 0.140344  | 22 |
| V\$PBX1_04     | Pbx1       | PBX1   | 0.0763577 | 22 |
| V\$DLX5_01     | dlx5       | DLX5   | 0.540294  | 22 |
| V\$GATA2_02    | GATA-2     | GATA2  | 0.433401  | 22 |
| V\$PITX2_01    | PITX2      | PITX2  | 0.229599  | 21 |
| V\$AHR_Q5      | AhR        | AHR    | 0.48884   | 21 |
| V\$IPF1_01     | IPF1       | PDX1   | 0.025169  | 21 |
| V\$GATA3_02    | GATA-3     | GATA3  | 0.651143  | 20 |
| V\$PITX2_Q2    | Pitx2      | PITX2  | 0.229599  | 20 |
| V\$SP1_Q4_01   | Sp1        | SP1    | 0.140344  | 19 |
| V\$SP1_Q6_01   | Sp1        | SP1    | 0.140344  | 19 |
| V\$WT1_Q6_01   | WT1        | WT1    | 0.0330903 | 19 |
| V\$YY1_Q6_03   | YY1        | YY1    | 0.191736  | 19 |
| V\$CRX_02      | Crx        | CRX    | 0.184091  | 19 |
| V\$HMGY1_01    | HMGY1      | HMGY1  | 0.145345  | 18 |
| V\$IPF1_Q4     | IPF1       | PDX1   | 0.025169  | 18 |
| V\$SP1_Q2_01   | Sp1        | SP1    | 0.140344  | 18 |
| V\$CEBPB_02    | C/EBPbeta  | CEBPB  | 0.188735  | 18 |
| V\$TBX5_01     | TBX5       | TBX5   | 0.0233848 | 18 |
| V\$CDX2_01     | Cdx-2      | CDX2   | 0.0315046 | 17 |
| V\$SP1_02      | SP1        | SP1    | 0.140344  | 17 |
| V\$PARP_Q3     | PARP       | PARP1  | 0.0871839 | 17 |
| V\$TCF4_Q5     | TCF-4      | TCF7L2 | 0.250641  | 16 |
| V\$TCF4_01     | TCF-4      | TCF7L2 | 0.250641  | 15 |
| V\$CRX_Q4_01   | CRX        | CRX    | 0.184091  | 15 |
| V\$ARNT_01     | Arnt       | ARNT   | 0.311153  | 15 |
| V\$RFX1_02     | RFX1       | RFX1   | 0.0131056 | 15 |
| V\$SMAD3_Q6    | SMAD3      | SMAD3  | 0.0776807 | 15 |
| V\$GATA3_01    | GATA-3     | GATA3  | 0.651143  | 15 |
| V\$AP2ALPHA_01 | AP-2alpha  | TFAP2A | 0.59942   | 14 |
| V\$SREBP1_Q6   | SREBP-1    | SREBF1 | 0.0818041 | 14 |
| V\$HOXD9_Q2    | Hoxd9      | HOXD9  | 0.0378089 | 13 |
| V\$GATA2_03    | GATA-2     | GATA2  | 0.433401  | 13 |
| V\$GATA3_03    | GATA-3     | GATA3  | 0.651143  | 12 |
| V\$AP2GAMMA_01 | AP-2gamma  | TFAP2C | 0.464678  | 12 |
| V\$ZABC1_01    | ZABC1      | ZNF217 | 0.448698  | 12 |
| V\$LHX3b_01    | LHX3b      | LHX3   | 0.0129278 | 12 |
| V\$YY1_02      | YY1        | YY1    | 0.191736  | 11 |

|                |            |        |           |    |
|----------------|------------|--------|-----------|----|
| V\$SP2_01      | SP2        | SP2    | 0.0845856 | 11 |
| V\$HOXA9_01    | hoxa9      | HOXA9  | 0.33191   | 11 |
| V\$FOXJ2_01    | FOXJ2      | FOXJ2  | 0.0548937 | 11 |
| V\$CP2_01      | CP2        | TFCP2  | 0.590002  | 11 |
| V\$GATA2_01    | GATA-2     | GATA2  | 0.433401  | 11 |
| V\$TEF1_Q6     | TEF-1      | TEAD1  | 0.0272431 | 11 |
| V\$TEF1_Q6_03  | TEF-1      | TEAD1  | 0.0272431 | 11 |
| V\$IPF1_02     | IPF1       | PDX1   | 0.025169  | 10 |
| V\$E2F1_Q3_01  | E2F-1      | E2F1   | 0.042001  | 10 |
| V\$FOXO4_02    | FOXO4      | FOXO4  | 0.63219   | 9  |
| V\$CEBPG_Q6_01 | C/EBPgamma | CEBPG  | 0.132434  | 9  |
| V\$POU6F1_03   | POU6F1     | POU6F1 | 0.257002  | 8  |
| V\$SOX2_Q6     | SOX2       | SOX2   | 0.0673171 | 8  |
| V\$CART1_02    | CART1      | ALX1   | 0.122673  | 7  |
| V\$IPF1_06     | ipf1       | PDX1   | 0.025169  | 6  |
| V\$YY1_03      | YY1        | YY1    | 0.191736  | 6  |
| V\$STAT4_Q5    | STAT4      | STAT4  | 0.0214643 | 6  |
| V\$POU6F1_02   | POU6F1     | POU6F1 | 0.257002  | 5  |
| V\$IPF1_03     | IPF1       | PDX1   | 0.025169  | 5  |
| V\$HLF_01      | HLF        | HLF    | 0.142828  | 4  |
| V\$CDP_04      | CDP        | CUX1   | 0.266313  | 3  |
| V\$NRF1_Q6     | NRF-1      | NRF1   | 0.0662365 | 3  |

hsa-mir-501

| Matrix_id     | transcription factor | Gene   | PCC        | Occurrence |
|---------------|----------------------|--------|------------|------------|
| V\$ZIC3_01    | Zic3                 | ZIC3   | 0.31427    | 4          |
| V\$SOX9_Q4    | SOX9                 | SOX9   | 0.0893275  | 4          |
| V\$GKLF_Q4    | GKLF                 | KLF4   | 0.0926548  | 4          |
| V\$HIF1A_Q6   | HIF-1alpha           | HIF1A  | 0.431904   | 4          |
| V\$ARNT_01    | Arnt                 | ARNT   | 0.00314431 | 4          |
| V\$NR1B2_Q6   | NR1B2                | RARB   | 0.140588   | 4          |
| V\$PARP_Q4    | PARP                 | PARP1  | 0.0655986  | 4          |
| V\$GATA3_01   | GATA-3               | GATA3  | 0.124143   | 4          |
| V\$TBP_Q6     | TBP                  | TBP    | 0.113966   | 3          |
| V\$PARP_Q3    | PARP                 | PARP1  | 0.0655986  | 3          |
| V\$CRX_Q4_01  | CRX                  | CRX    | 0.180587   | 3          |
| V\$P300_01    | p300                 | EP300  | 0.016275   | 3          |
| V\$TCF4_01    | TCF-4                | TCF7L2 | 0.0549985  | 3          |
| V\$IRF8_Q6    | IRF-8                | IRF8   | 0.067542   | 3          |
| V\$HOX13_02   | HOXA5                | HOXA5  | 0.445259   | 3          |
| V\$E2F1_Q3_01 | E2F-1                | E2F1   | 0.233106   | 3          |
| V\$SREBP1_Q6  | SREBP-1              | SREBF1 | 0.390022   | 3          |

|                |            |        |           |   |
|----------------|------------|--------|-----------|---|
| V\$TCF4_Q5     | TCF-4      | TCF7L2 | 0.0549985 | 3 |
| V\$AP2ALPHA_01 | AP-2alpha  | TFAP2A | 0.0817444 | 3 |
| V\$GATA6_01    | GATA-6     | GATA6  | 0.195242  | 3 |
| V\$AP4_Q6_02   | AP-4       | TFAP4  | 0.153962  | 3 |
| V\$GATA3_02    | GATA-3     | GATA3  | 0.124143  | 3 |
| V\$DLX5_01     | dlx5       | DLX5   | 0.381536  | 3 |
| V\$PITX3_Q2    | PITX3      | PITX3  | 0.159132  | 2 |
| V\$HNF4A_Q6_01 | HNF-4alpha | HNF4A  | 0.454403  | 2 |
| V\$MEF2C_Q4    | MEF-2C     | MEF2C  | 0.0227768 | 2 |
| V\$FOXJ2_01    | FOXJ2      | FOXJ2  | 0.136857  | 2 |
| V\$SOX9_B1     | SOX9       | SOX9   | 0.0893275 | 2 |
| V\$CRX_Q4      | Crx        | CRX    | 0.180587  | 2 |
| V\$CRX_02      | Crx        | CRX    | 0.180587  | 2 |
| V\$PBX1_04     | Pbx1       | PBX1   | 0.243288  | 2 |
| V\$CP2_01      | CP2        | TFCP2  | 0.428566  | 2 |
| V\$CART1_02    | CART1      | ALX1   | 0.113906  | 2 |
| V\$SOX5_01     | SOX5       | SOX5   | 0.109682  | 2 |
| V\$NKX2B_Q3    | NKX2B      | NKX2-2 | 0.0237923 | 1 |
| V\$GATA3_03    | GATA-3     | GATA3  | 0.124143  | 1 |
| V\$NKX22_02    | NKX2B      | NKX2-2 | 0.0237923 | 1 |
| V\$HLF_01      | HLF        | HLF    | 0.244499  | 1 |
| V\$FOXO4_02    | FOXO4      | FOXO4  | 0.183671  | 1 |
| V\$HOXD9_Q2    | Hoxd9      | HOXD9  | 0.0178621 | 1 |
| V\$SOX2_Q6     | SOX2       | SOX2   | 0.0901642 | 1 |
| V\$POU6F1_03   | POU6F1     | POU6F1 | 0.222141  | 1 |
| V\$POU6F1_02   | POU6F1     | POU6F1 | 0.222141  | 1 |
| V\$HOXA9_01    | hoxa9      | HOXA9  | 0.149993  | 1 |
| V\$STAT4_Q5    | STAT4      | STAT4  | 0.0156793 | 1 |

hsa-mir-502

| Matrix_id    | transcription factor | Gene  | PCC       | Occurrence |
|--------------|----------------------|-------|-----------|------------|
| V\$GATA1_01  | GATA-1               | GATA1 | 0.0780276 | 6          |
| V\$ZIC3_01   | Zic3                 | ZIC3  | 0.190632  | 6          |
| V\$AP2REP_01 | AP-2rep              | KLF12 | 0.0772799 | 6          |
| V\$HNF3A_01  | HNF3A                | FOXA1 | 0.122196  | 6          |
| V\$PUR1_Q4   | PUR1                 | PURA  | 0.313241  | 6          |
| V\$GKLF_Q4   | GKLF                 | KLF4  | 0.35021   | 6          |
| V\$AML1_Q6   | AML1                 | RUNX1 | 0.107093  | 6          |
| V\$IK_Q5     | Ikaros               | IKZF1 | 0.0159994 | 6          |
| V\$PBX1_04   | Pbx1                 | PBX1  | 0.16298   | 6          |
| V\$PARP_Q4   | PARP                 | PARP1 | 0.124271  | 6          |
| V\$AHR_Q5    | AhR                  | AHR   | 0.62425   | 5          |



|                |           |          |           |   |
|----------------|-----------|----------|-----------|---|
| V\$SP1_02      | SP1       | SP1      | 0.412709  | 5 |
| V\$TBX5_02     | TBX5      | TBX5     | 0.228665  | 5 |
| V\$E2F1_Q3_01  | E2F-1     | E2F1     | 0.0581372 | 5 |
| V\$SP1_Q2_01   | Sp1       | SP1      | 0.412709  | 5 |
| V\$TCF4_01     | TCF-4     | TCF7L2   | 0.450467  | 5 |
| V\$NANOG_02    | Nanog     | NANOG    | 0.213604  | 5 |
| V\$BEN_01      | BEN       | GTF2IRD1 | 0.173788  | 5 |
| V\$IPF1_01     | IPF1      | PDX1     | 0.225111  | 5 |
| V\$SP1_Q6_01   | Sp1       | SP1      | 0.412709  | 5 |
| V\$TEF1_Q6     | TEF-1     | TEAD1    | 0.264361  | 5 |
| V\$SP1_Q4_01   | Sp1       | SP1      | 0.412709  | 5 |
| V\$P300_01     | p300      | EP300    | 0.465047  | 5 |
| V\$GATA1_04    | GATA-1    | GATA1    | 0.0780276 | 5 |
| V\$GR_Q6       | GR        | NR3C1    | 0.383087  | 5 |
| V\$GATA1_02    | GATA-1    | GATA1    | 0.0780276 | 5 |
| V\$SP1_Q6      | Sp1       | SP1      | 0.412709  | 5 |
| V\$NFAT4_Q3    | NF-AT4    | NFATC3   | 0.0766737 | 5 |
| V\$ARNT_01     | Arnt      | ARNT     | 0.501711  | 5 |
| V\$SMAD4_Q6_01 | Smad4     | SMAD4    | 0.543116  | 5 |
| V\$DLX5_01     | dlx5      | DLX5     | 0.690418  | 5 |
| V\$NKX32_01    | Nkx3-2    | NKX3-2   | 0.24046   | 4 |
| V\$SMAD3_Q6_01 | Smad3     | SMAD3    | 0.183914  | 4 |
| V\$WT1_Q6_01   | WT1       | WT1      | 0.445965  | 4 |
| V\$CDX2_Q5_02  | CDX-2     | CDX2     | 0.175389  | 4 |
| V\$NR1B2_Q6    | NR1B2     | RARB     | 0.181561  | 4 |
| V\$CART1_02    | CART1     | ALX1     | 0.213308  | 4 |
| V\$PARP_Q3     | PARP      | PARP1    | 0.124271  | 4 |
| V\$IPF1_02     | IPF1      | PDX1     | 0.225111  | 4 |
| V\$IPF1_03     | IPF1      | PDX1     | 0.225111  | 4 |
| V\$TEF1_Q6_03  | TEF-1     | TEAD1    | 0.264361  | 4 |
| V\$SP2_01      | SP2       | SP2      | 0.0983049 | 4 |
| V\$IPF1_Q6     | IPF1      | PDX1     | 0.225111  | 4 |
| V\$CDX2_Q5_01  | Cdx-2     | CDX2     | 0.175389  | 4 |
| V\$IPF1_06     | ipf1      | PDX1     | 0.225111  | 4 |
| V\$TBX5_01     | TBX5      | TBX5     | 0.228665  | 4 |
| V\$IPF1_Q4_01  | IPF1      | PDX1     | 0.225111  | 4 |
| V\$GATA2_01    | GATA-2    | GATA2    | 0.734581  | 4 |
| V\$IPF1_Q4     | IPF1      | PDX1     | 0.225111  | 4 |
| V\$SRY_02      | SRY       | SRY      | 0.33211   | 4 |
| V\$GATA1_05    | GATA-1    | GATA1    | 0.0780276 | 4 |
| V\$GATA3_02    | GATA-3    | GATA3    | 0.655805  | 4 |
| V\$GATA2_02    | GATA-2    | GATA2    | 0.734581  | 4 |
| V\$CRX_Q4      | Crx       | CRX      | 0.125065  | 4 |
| V\$AP2ALPHA_01 | AP-2alpha | TFAP2A   | 0.719629  | 4 |
| V\$TCF4_Q5     | TCF-4     | TCF7L2   | 0.450467  | 4 |
| V\$GATA1_06    | GATA-1    | GATA1    | 0.0780276 | 4 |

|                |            |        |            |   |
|----------------|------------|--------|------------|---|
| V\$YY1_01      | YY1        | YY1    | 0.325653   | 4 |
| V\$SOX5_01     | SOX5       | SOX5   | 0.264399   | 4 |
| V\$TBP_Q6      | TBP        | TBP    | 0.377506   | 4 |
| V\$GATA3_01    | GATA-3     | GATA3  | 0.655805   | 4 |
| V\$GATA2_03    | GATA-2     | GATA2  | 0.734581   | 3 |
| V\$CDX2_01     | Cdx-2      | CDX2   | 0.175389   | 3 |
| V\$ZBP89_Q4    | ZBP89      | ZNF148 | 0.131298   | 3 |
| V\$RFX1_02     | RFX1       | RFX1   | 0.176992   | 3 |
| V\$NKX32_02    | Nkx3-2     | NKX3-2 | 0.24046    | 3 |
| V\$HMGY1_01    | HMGY1      | HMGY1  | 0.18199    | 3 |
| V\$AP4_Q6_02   | AP-4       | TFAP4  | 0.0731815  | 3 |
| V\$CRX_Q4_01   | CRX        | CRX    | 0.125065   | 3 |
| V\$SMAD3_Q6    | SMAD3      | SMAD3  | 0.183914   | 3 |
| V\$FOXO4_02    | FOXO4      | FOXO4  | 0.628571   | 3 |
| V\$AP2GAMMA_01 | AP-2gamma  | TFAP2C | 0.71921    | 3 |
| V\$YY1_Q6_03   | YY1        | YY1    | 0.325653   | 3 |
| V\$FOXJ2_01    | FOXJ2      | FOXJ2  | 0.22841    | 3 |
| V\$CEBPB_02    | C/EBPbeta  | CEBPB  | 0.302265   | 3 |
| V\$CP2_01      | CP2        | TFCP2  | 0.351751   | 3 |
| V\$NFAT2_Q5    | NF-AT2     | NFATC1 | 0.143232   | 3 |
| V\$LHX3b_01    | LHX3b      | LHX3   | 0.145688   | 2 |
| V\$STAT4_Q5    | STAT4      | STAT4  | 0.164764   | 2 |
| V\$BCL6_Q3_01  | Bcl-6      | BCL6   | 0.186492   | 2 |
| V\$NCX_02      | Ncx        | TLX2   | 0.00159238 | 2 |
| V\$YY1_Q6_02   | YY1        | YY1    | 0.325653   | 2 |
| V\$YY1_Q6      | YY1        | YY1    | 0.325653   | 2 |
| V\$PITX2_Q2    | Pitx2      | PITX2  | 0.544399   | 2 |
| V\$HOXA9_01    | hoxa9      | HOXA9  | 0.415816   | 2 |
| V\$GATA3_03    | GATA-3     | GATA3  | 0.655805   | 2 |
| V\$CDX1_01     | Cdx-1      | CDX1   | 0.0722411  | 2 |
| V\$POU6F1_02   | POU6F1     | POU6F1 | 0.0621987  | 2 |
| V\$PITX2_01    | PITX2      | PITX2  | 0.544399   | 2 |
| V\$POU6F1_03   | POU6F1     | POU6F1 | 0.0621987  | 2 |
| V\$PITX1_01    | Pitx1      | PITX1  | 0.168749   | 1 |
| V\$BACH2_01    | Bach2      | BACH2  | 0.143896   | 1 |
| V\$YY1_03      | YY1        | YY1    | 0.325653   | 1 |
| V\$YY1_02      | YY1        | YY1    | 0.325653   | 1 |
| V\$CRX_02      | Crx        | CRX    | 0.125065   | 1 |
| V\$NRF1_Q6     | NRF-1      | NRF1   | 0.247564   | 1 |
| V\$ZABC1_01    | ZABC1      | ZNF217 | 0.649136   | 1 |
| V\$CDP_04      | CDP        | CUX1   | 0.43184    | 1 |
| V\$HLF_01      | HLF        | HLF    | 0.032312   | 1 |
| V\$HOXD9_Q2    | Hoxd9      | HOXD9  | 0.216455   | 1 |
| V\$CEBPG_Q6_01 | C/EBPgamma | CEBPG  | 0.398984   | 1 |

---

hsa-mir-503

| Matrix_id      | transcription factor | Gene   | PCC        | Occurrence |
|----------------|----------------------|--------|------------|------------|
| V\$PUR1_Q4     | PUR1                 | PURA   | 0.16005    | 263        |
| V\$PEA3_Q6     | PEA3                 | ETV4   | 0.0983111  | 257        |
| V\$PARP_Q4     | PARP                 | PARP1  | 0.0995149  | 254        |
| V\$ELF1_Q6     | Elf-1                | ELF1   | 0.165773   | 249        |
| V\$GKLF_Q4     | GKLF                 | KLF4   | 0.567492   | 246        |
| V\$MAFB_01     | MAFB                 | MAFB   | 0.300398   | 241        |
| V\$ETS1_B      | c-Ets-1              | ETS1   | 0.0679363  | 230        |
| V\$CETS1_Q6    | C-ets-1              | ETS1   | 0.0679363  | 224        |
| V\$SMAD4_Q6_01 | Smad4                | SMAD4  | 0.308843   | 223        |
| V\$GATA1_01    | GATA-1               | GATA1  | 0.0170848  | 213        |
| V\$GABPA_Q4    | GABP-alpha           | GABPA  | 0.364776   | 212        |
| V\$TBP_Q6      | TBP                  | TBP    | 0.156746   | 202        |
| V\$GR_Q6       | GR                   | NR3C1  | 0.157584   | 201        |
| V\$YY1_01      | YY1                  | YY1    | 0.367543   | 197        |
| V\$AML1_Q6     | AML1                 | RUNX1  | 0.00174447 | 188        |
| V\$DLX5_01     | dlx5                 | DLX5   | 0.691609   | 178        |
| V\$YY1_Q6_02   | YY1                  | YY1    | 0.367543   | 176        |
| V\$YY1_Q6      | YY1                  | YY1    | 0.367543   | 176        |
| V\$GATA1_02    | GATA-1               | GATA1  | 0.0170848  | 173        |
| V\$GATA1_05    | GATA-1               | GATA1  | 0.0170848  | 165        |
| V\$GATA1_06    | GATA-1               | GATA1  | 0.0170848  | 165        |
| V\$GATA2_02    | GATA-2               | GATA2  | 0.695429   | 165        |
| V\$ERBETA_Q5   | ER-beta              | ESR2   | 0.0421464  | 160        |
| V\$PARP_Q3     | PARP                 | PARP1  | 0.0995149  | 159        |
| V\$HMGY1_Q1    | HMGY1                | HMGY1  | 0.341965   | 145        |
| V\$GATA3_Q2    | GATA-3               | GATA3  | 0.912183   | 141        |
| V\$YY1_Q6_03   | YY1                  | YY1    | 0.367543   | 132        |
| V\$CEBPE_Q6    | CEBPE                | CEBPE  | 0.0285527  | 121        |
| V\$GR_Q1       | GR                   | NR3C1  | 0.157584   | 119        |
| V\$TCF4_Q1     | TCF-4                | TCF7L2 | 0.46753    | 118        |
| V\$CEBPA_Q6    | C/EBPalpha           | CEBPA  | 0.0713893  | 117        |
| V\$TCF4_Q5     | TCF-4                | TCF7L2 | 0.46753    | 111        |
| V\$IRF7_Q3     | IRF-7                | IRF7   | 0.130981   | 107        |
| V\$FOXJ2_Q1    | FOXJ2                | FOXJ2  | 0.0461565  | 106        |
| V\$CREM_Q6     | CREM                 | CREM   | 0.172813   | 98         |
| V\$GABPBETA_Q3 | GABP-beta            | GABPB1 | 0.228391   | 96         |
| V\$HBP1_Q2     | hbp1                 | HBP1   | 0.668623   | 90         |
| V\$CEBPG_Q6_01 | C/EBPgamma           | CEBPG  | 0.547814   | 82         |
| V\$GATA2_Q3    | GATA-2               | GATA2  | 0.695429   | 77         |
| V\$STAT3_Q3    | STAT3                | STAT3  | 0.146628   | 76         |
| V\$FOXO4_Q2    | FOXO4                | FOXO4  | 0.956047   | 75         |

|               |            |        |           |    |
|---------------|------------|--------|-----------|----|
| V\$YY1_02     | YY1        | YY1    | 0.367543  | 74 |
| V\$CEBPA_01   | C/EBPalpha | CEBPA  | 0.0713893 | 72 |
| V\$P53_02     | p53        | TP53   | 0.605859  | 66 |
| V\$E2F4_Q6    | E2F-4      | E2F4   | 0.0663263 | 65 |
| V\$ELK1_01    | Elk-1      | ELK1   | 0.0202257 | 63 |
| V\$CIZ_01     | CIZ        | ZNF384 | 0.0830076 | 56 |
| V\$IRF1_Q6_01 | IRF-1      | IRF1   | 0.338402  | 49 |
| V\$CEBPG_Q6   | C/EBPgamma | CEBPG  | 0.547814  | 46 |
| V\$IRF1_Q6    | IRF-1      | IRF1   | 0.338402  | 44 |
| V\$CDP_04     | CDP        | CUX1   | 0.363955  | 38 |
| V\$FOXO4_01   | FOXO4      | FOXO4  | 0.956047  | 35 |
| V\$FOXJ2_02   | FOXJ2      | FOXJ2  | 0.0461565 | 30 |
| V\$TCF4_Q5_01 | TCF-4      | TCF7L2 | 0.46753   | 18 |

hsa-mir-505

| Matrix_id      | transcription factor | Gene    | PCC        | Occurrence |
|----------------|----------------------|---------|------------|------------|
| V\$SREBP1_Q6   | SREBP-1              | SREBF1  | 0.368536   | 2          |
| V\$MATH1_Q2    | MATH1                | ATOH1   | 0.180232   | 2          |
| V\$MAFB_01     | MAFB                 | MAFB    | 0.152178   | 2          |
| V\$HNF3A_01    | HNF3A                | FOXA1   | 0.279508   | 2          |
| V\$HNF3B_Q6    | HNF-3beta            | FOXA2   | 0.024055   | 2          |
| V\$HOXA9_01    | hoxa9                | HOXA9   | 0.0271782  | 2          |
| V\$SMAD3_Q6_01 | Smad3                | SMAD3   | 0.0594151  | 2          |
| V\$ERBETA_Q5   | ER-beta              | ESR2    | 0.0475718  | 2          |
| V\$DBP_Q6_01   | DBP                  | DBP     | 0.00534351 | 2          |
| V\$CDX2_01     | Cdx-2                | CDX2    | 0.00641135 | 2          |
| V\$FKLF_Q5     | FKLF                 | KLF11   | 0.169834   | 2          |
| V\$CDX2_Q5_01  | Cdx-2                | CDX2    | 0.00641135 | 2          |
| V\$PUR1_Q4     | PUR1                 | PURA    | 0.0287421  | 2          |
| V\$HOXA7_01    | HOXA7                | HOXA7   | 0.272034   | 2          |
| V\$MYOD_Q6_01  | MyoD                 | MYOD1   | 0.117618   | 2          |
| V\$HNF6_Q6     | HNF6                 | ONECUT1 | 0.580756   | 2          |
| V\$PBX1_Q3     | Pbx1                 | PBX1    | 0.0769166  | 2          |
| V\$SOX9_B1     | SOX9                 | SOX9    | 0.0697598  | 2          |
| V\$NR1B2_Q6    | NR1B2                | RARB    | 0.0845622  | 2          |
| V\$MYOD_Q6     | MyoD                 | MYOD1   | 0.117618   | 2          |
| V\$SMAD3_Q6    | SMAD3                | SMAD3   | 0.0594151  | 2          |
| V\$MYOD_Q6_02  | MyoD                 | MYOD1   | 0.117618   | 2          |
| V\$ELF1_Q6     | Elf-1                | ELF1    | 0.358206   | 2          |
| V\$CDX2_Q5_02  | CDX-2                | CDX2    | 0.00641135 | 2          |
| V\$OCAB_Q6     | OCA-B                | POU2AF1 | 0.157388   | 2          |
| V\$GATA6_01    | GATA-6               | GATA6   | 0.126434   | 2          |

|                |            |         |            |   |
|----------------|------------|---------|------------|---|
| V\$EAR2_Q2     | EAR2       | NR2F6   | 0.340353   | 1 |
| V\$PITX3_Q2    | PITX3      | PITX3   | 0.146355   | 1 |
| V\$OC2_Q3      | OC-2       | ONECUT2 | 0.0772972  | 1 |
| V\$Elf5_Q3     | ELF5       | ELF5    | 0.389197   | 1 |
| V\$CEBPB_Q6    | C/EBPbeta  | CEBPB   | 0.00754331 | 1 |
| V\$HIF1A_Q6    | HIF-1alpha | HIF1A   | 0.237978   | 1 |
| V\$HNF4A_Q6_01 | HNF-4alpha | HNF4A   | 0.257157   | 1 |
| V\$CRX_Q4      | Crx        | CRX     | 0.15804    | 1 |
| V\$MAZ_Q6_01   | MAZ        | MAZ     | 0.0974725  | 1 |
| V\$CRX_Q4_01   | CRX        | CRX     | 0.15804    | 1 |
| V\$NURR1_Q3    | NURR1      | NR4A2   | 0.415395   | 1 |
| V\$ELF5_Q1     | ELF5       | ELF5    | 0.389197   | 1 |
| V\$RORA_Q4     | RORalpha   | RORA    | 0.371331   | 1 |
| V\$PIT1_Q6     | Pit-1      | POU1F1  | 0.203055   | 1 |
| V\$CEBPB_Q1    | C/EBPbeta  | CEBPB   | 0.00754331 | 1 |
| V\$CDX2_Q5     | Cdx-2      | CDX2    | 0.00641135 | 1 |
| V\$TCF4_Q5     | TCF-4      | TCF7L2  | 0.0111451  | 1 |
| V\$MEIS1_Q1    | MEIS1      | MEIS1   | 0.249875   | 1 |
| V\$SOX2_Q6     | SOX2       | SOX2    | 0.332306   | 1 |
| V\$SOX9_Q4     | SOX9       | SOX9    | 0.0697598  | 1 |
| V\$TCF4_Q1     | TCF-4      | TCF7L2  | 0.0111451  | 1 |
| V\$IRF8_Q6     | IRF-8      | IRF8    | 0.0197326  | 1 |
| V\$GABPA_Q4    | GABP-alpha | GABPA   | 0.152094   | 1 |
| V\$TCF3_Q1     | TCF-3      | TCF7L1  | 0.217092   | 1 |
| V\$CRX_Q2      | Crx        | CRX     | 0.15804    | 1 |
| V\$MEIS1_Q2    | Meis1      | MEIS1   | 0.249875   | 1 |
| V\$CDX1_Q1     | Cdx-1      | CDX1    | 0.366999   | 1 |
| V\$NEUROD_Q2   | NeuroD     | NEUROD1 | 0.00387019 | 1 |
| V\$CEBPA_Q1    | C/EBPalpha | CEBPA   | 0.617238   | 1 |

hsa-mir-506

| Matrix_id    | transcription factor | Gene   | PCC       | Occurrence |
|--------------|----------------------|--------|-----------|------------|
| V\$GKLF_Q4   | GKLF                 | KLF4   | 0.12645   | 337        |
| V\$AP2REP_Q1 | AP-2rep              | KLF12  | 0.106276  | 337        |
| V\$PEA3_Q6   | PEA3                 | ETV4   | 0.1091    | 333        |
| V\$P300_Q1   | p300                 | EP300  | 0.0552819 | 324        |
| V\$ZIC3_Q1   | Zic3                 | ZIC3   | 0.3663    | 299        |
| V\$SOX9_Q4   | SOX9                 | SOX9   | 0.643662  | 294        |
| V\$GATA1_Q1  | GATA-1               | GATA1  | 0.144191  | 288        |
| V\$CETS1_Q6  | C-ets-1              | ETS1   | 0.150928  | 287        |
| V\$NFAT4_Q3  | NF-AT4               | NFATC3 | 0.0723661 | 283        |
| V\$ETS1_B    | c-Ets-1              | ETS1   | 0.150928  | 282        |

|                   |            |        |            |     |
|-------------------|------------|--------|------------|-----|
| V\$YY1_01         | YY1        | YY1    | 0.154561   | 281 |
| V\$GABPA_Q4       | GABP-alpha | GABPA  | 0.0230381  | 276 |
| V\$TBX5_02        | TBX5       | TBX5   | 0.020796   | 274 |
| V\$HNF4A_Q6_01    | HNF-4alpha | HNF4A  | 0.0276837  | 269 |
| V\$YY1_Q6         | YY1        | YY1    | 0.154561   | 254 |
| V\$AML1_Q6        | AML1       | RUNX1  | 0.170594   | 253 |
| V\$YY1_Q6_02      | YY1        | YY1    | 0.154561   | 243 |
| V\$SP1_Q6         | Sp1        | SP1    | 0.0227717  | 236 |
| V\$NKX32_01       | Nkx3-2     | NKX3-2 | 0.316326   | 225 |
| V\$TBX5_01        | TBX5       | TBX5   | 0.020796   | 224 |
| V\$PITX3_Q2       | PITX3      | PITX3  | 0.0656226  | 220 |
| V\$MAZ_Q6         | MAZ        | MAZ    | 0.379129   | 219 |
| V\$ERBETA_Q5      | ER-beta    | ESR2   | 0.257076   | 217 |
| V\$E12_Q6         | E12        | TCF3   | 0.422671   | 216 |
| V\$E2A_Q6         | E2A        | TCF3   | 0.422671   | 216 |
| V\$E47_02         | E47        | TCF3   | 0.422671   | 215 |
| V\$SP1_01         | Sp1        | SP1    | 0.0227717  | 208 |
| V\$ING4_01        | ING4       | ING4   | 0.0891331  | 207 |
| V\$ELK1_02        | Elk-1      | ELK1   | 0.274016   | 206 |
| V\$SP1_Q6_01      | Sp1        | SP1    | 0.0227717  | 204 |
| V\$SP1_Q4_01      | Sp1        | SP1    | 0.0227717  | 198 |
| V\$HNF3B_Q6       | HNF-3beta  | FOXA2  | 0.0605376  | 196 |
| V\$ELK1_06        | ELK-1      | ELK1   | 0.274016   | 193 |
| V\$SP1_Q2_01      | Sp1        | SP1    | 0.0227717  | 190 |
| V\$SP1_02         | SP1        | SP1    | 0.0227717  | 184 |
| V\$ERF_02         | ERF        | ERF    | 0.00326475 | 179 |
| V\$CREM_Q6        | CREM       | CREM   | 0.553724   | 173 |
| V\$MYOGENIN_Q6    | myogenin   | MYOG   | 0.181789   | 172 |
| V\$E2A_Q2         | E2A        | TCF3   | 0.422671   | 162 |
| V\$SREBP1_Q6      | SREBP-1    | SREBF1 | 0.190199   | 154 |
| V\$FKLF_Q5        | FKLF       | KLF11  | 0.31863    | 153 |
| V\$FOXP3_01       | FOXP3      | FOXP3  | 0.0202327  | 150 |
| V\$GABPBETA_Q3    | GABP-beta  | GABPB1 | 0.157454   | 147 |
| V\$AML1_01        | AML1a      | RUNX1  | 0.170594   | 145 |
| V\$AML1_Q4        | AML1       | RUNX1  | 0.170594   | 132 |
| V\$WT1_Q6         | WT1        | WT1    | 0.206392   | 131 |
| V\$MAZ_Q6_01      | MAZ        | MAZ    | 0.379129   | 126 |
| V\$YY1_02         | YY1        | YY1    | 0.154561   | 122 |
| V\$E47_01         | E47        | TCF3   | 0.422671   | 121 |
| V\$DAX1_01        | Dax1       | NR0B1  | 0.584553   | 118 |
| V\$MYOGENIN_Q6_01 | myogenin   | MYOG   | 0.181789   | 113 |
| V\$ERM_02         | Erm        | ETV5   | 0.373026   | 95  |
| V\$ELK1_01        | Elk-1      | ELK1   | 0.274016   | 93  |
| V\$SPIB_03        | Spi-B      | SPIB   | 0.0291967  | 85  |
| V\$MATH1_Q2       | MATH1      | ATOH1  | 0.187522   | 78  |
| V\$EGR2_01        | Egr-2      | EGR2   | 0.267075   | 51  |

|               |         |        |            |    |
|---------------|---------|--------|------------|----|
| V\$SREBP1_Q2  | SREBP-1 | SREBF1 | 0.190199   | 29 |
| V\$GLI3_Q5_Q1 | GLI3    | GLI3   | 0.00061332 | 29 |

hsa-mir-507

| Matrix_id      | transcription factor | Gene   | PCC        | Occurrence |
|----------------|----------------------|--------|------------|------------|
| V\$AP2REP_Q1   | AP-2rep              | KLF12  | 0.104783   | 339        |
| V\$GKLF_Q4     | GKLF                 | KLF4   | 0.135731   | 338        |
| V\$PEA3_Q6     | PEA3                 | ETV4   | 0.105244   | 335        |
| V\$P300_Q1     | p300                 | EP300  | 0.06091    | 326        |
| V\$ZIC3_Q1     | Zic3                 | ZIC3   | 0.364024   | 300        |
| V\$SOX9_Q4     | SOX9                 | SOX9   | 0.650877   | 295        |
| V\$GATA1_Q1    | GATA-1               | GATA1  | 0.166628   | 290        |
| V\$CETS1_Q6    | C-ets-1              | ETS1   | 0.169672   | 289        |
| V\$NFAT4_Q3    | NF-AT4               | NFATC3 | 0.0812033  | 283        |
| V\$ETS1_B      | c-Ets-1              | ETS1   | 0.169672   | 282        |
| V\$YY1_Q1      | YY1                  | YY1    | 0.158969   | 282        |
| V\$TBX5_Q2     | TBX5                 | TBX5   | 0.0305597  | 277        |
| V\$GABPA_Q4    | GABP-alpha           | GABPA  | 0.0261348  | 276        |
| V\$HNF4A_Q6_Q1 | HNF-4alpha           | HNF4A  | 0.00676163 | 270        |
| V\$YY1_Q6      | YY1                  | YY1    | 0.158969   | 257        |
| V\$AML1_Q6     | AML1                 | RUNX1  | 0.17817    | 252        |
| V\$YY1_Q6_Q2   | YY1                  | YY1    | 0.158969   | 245        |
| V\$SP1_Q6      | Sp1                  | SP1    | 0.0292724  | 240        |
| V\$NKX32_Q1    | Nkx3-2               | NKX3-2 | 0.32374    | 227        |
| V\$TBX5_Q1     | TBX5                 | TBX5   | 0.0305597  | 225        |
| V\$PITX3_Q2    | PITX3                | PITX3  | 0.0419136  | 221        |
| V\$MAZ_Q6      | MAZ                  | MAZ    | 0.380747   | 221        |
| V\$E12_Q6      | E12                  | TCF3   | 0.433743   | 218        |
| V\$ERBETA_Q5   | ER-beta              | ESR2   | 0.256708   | 218        |
| V\$E2A_Q6      | E2A                  | TCF3   | 0.433743   | 218        |
| V\$E47_Q2      | E47                  | TCF3   | 0.433743   | 217        |
| V\$SP1_Q1      | Sp1                  | SP1    | 0.0292724  | 212        |
| V\$ING4_Q1     | ING4                 | ING4   | 0.100046   | 208        |
| V\$SP1_Q6_Q1   | Sp1                  | SP1    | 0.0292724  | 208        |
| V\$ELK1_Q2     | Elk-1                | ELK1   | 0.259013   | 207        |
| V\$SP1_Q4_Q1   | Sp1                  | SP1    | 0.0292724  | 202        |
| V\$HNF3B_Q6    | HNF-3beta            | FOXA2  | 0.0794719  | 197        |
| V\$ELK1_Q6     | ELK-1                | ELK1   | 0.259013   | 194        |
| V\$SP1_Q2_Q1   | Sp1                  | SP1    | 0.0292724  | 194        |
| V\$SP1_Q2      | SP1                  | SP1    | 0.0292724  | 189        |
| V\$ERF_Q2      | ERF                  | ERF    | 0.0218276  | 180        |
| V\$MYOGENIN_Q6 | myogenin             | MYOG   | 0.182505   | 174        |

|                   |           |        |            |     |
|-------------------|-----------|--------|------------|-----|
| V\$CREM_Q6        | CREM      | CREM   | 0.528217   | 174 |
| V\$E2A_Q2         | E2A       | TCF3   | 0.433743   | 164 |
| V\$FKLF_Q5        | FKLF      | KLF11  | 0.314366   | 155 |
| V\$SREBP1_Q6      | SREBP-1   | SREBF1 | 0.149918   | 154 |
| V\$FOXP3_Q1       | FOXP3     | FOXP3  | 0.0130914  | 152 |
| V\$GABPBETA_Q3    | GABP-beta | GABPB1 | 0.156045   | 147 |
| V\$AML1_Q1        | AML1a     | RUNX1  | 0.17817    | 144 |
| V\$WT1_Q6         | WT1       | WT1    | 0.209998   | 132 |
| V\$AML1_Q4        | AML1      | RUNX1  | 0.17817    | 131 |
| V\$MAZ_Q6_Q1      | MAZ       | MAZ    | 0.380747   | 127 |
| V\$E47_Q1         | E47       | TCF3   | 0.433743   | 123 |
| V\$YY1_Q2         | YY1       | YY1    | 0.158969   | 123 |
| V\$DAX1_Q1        | Dax1      | NR0B1  | 0.569677   | 118 |
| V\$MYOGENIN_Q6_Q1 | myogenin  | MYOG   | 0.182505   | 112 |
| V\$ERM_Q2         | Erm       | ETV5   | 0.353231   | 97  |
| V\$ELK1_Q1        | Elk-1     | ELK1   | 0.259013   | 94  |
| V\$SPIB_Q3        | Spi-B     | SPIB   | 0.0443451  | 85  |
| V\$MATH1_Q2       | MATH1     | ATOH1  | 0.169532   | 78  |
| V\$EGR2_Q1        | Egr-2     | EGR2   | 0.284316   | 53  |
| V\$GLI3_Q5_Q1     | GLI3      | GLI3   | 0.00951285 | 31  |
| V\$SREBP1_Q2      | SREBP-1   | SREBF1 | 0.149918   | 28  |

hsa-mir-508

| Matrix_id      | transcription factor | Gene   | PCC       | Occurrence |
|----------------|----------------------|--------|-----------|------------|
| V\$GKLF_Q4     | GKLF                 | KLF4   | 0.11594   | 327        |
| V\$AP2REP_Q1   | AP-2rep              | KLF12  | 0.0991236 | 327        |
| V\$PEA3_Q6     | PEA3                 | ETV4   | 0.114528  | 322        |
| V\$PARP_Q4     | PARP                 | PARP1  | 0.180163  | 322        |
| V\$P300_Q1     | p300                 | EP300  | 0.0407174 | 315        |
| V\$ZIC3_Q1     | Zic3                 | ZIC3   | 0.350747  | 290        |
| V\$TBP_Q6      | TBP                  | TBP    | 0.803342  | 288        |
| V\$SOX9_Q4     | SOX9                 | SOX9   | 0.63011   | 283        |
| V\$CETS1_Q6    | C-ets-1              | ETS1   | 0.126874  | 276        |
| V\$NFAT4_Q3    | NF-AT4               | NFATC3 | 0.0574944 | 273        |
| V\$YY1_Q1      | YY1                  | YY1    | 0.135432  | 273        |
| V\$ETS1_B      | c-Ets-1              | ETS1   | 0.126874  | 271        |
| V\$GABPA_Q4    | GABP-alpha           | GABPA  | 0.0102325 | 267        |
| V\$TBX5_Q2     | TBX5                 | TBX5   | 0.010328  | 267        |
| V\$HNF4A_Q6_Q1 | HNF-4alpha           | HNF4A  | 0.0239438 | 261        |
| V\$DLX5_Q1     | dlx5                 | DLX5   | 0.305241  | 258        |
| V\$SOX5_Q1     | SOX5                 | SOX5   | 0.621603  | 251        |
| V\$SOX9_B1     | SOX9                 | SOX9   | 0.63011   | 250        |



|                   |            |         |            |     |
|-------------------|------------|---------|------------|-----|
| V\$YY1_Q6         | YY1        | YY1     | 0.135432   | 246 |
| V\$AML1_Q6        | AML1       | RUNX1   | 0.156987   | 244 |
| V\$YY1_Q6_02      | YY1        | YY1     | 0.135432   | 235 |
| V\$GATA6_01       | GATA-6     | GATA6   | 0.00267406 | 223 |
| V\$GATA1_06       | GATA-1     | GATA1   | 0.120545   | 223 |
| V\$GATA1_05       | GATA-1     | GATA1   | 0.120545   | 223 |
| V\$SRY_02         | SRY        | SRY     | 0.099541   | 221 |
| V\$GATA1_02       | GATA-1     | GATA1   | 0.120545   | 220 |
| V\$TBX5_01        | TBX5       | TBX5    | 0.010328   | 218 |
| V\$PITX3_Q2       | PITX3      | PITX3   | 0.0720997  | 214 |
| V\$E47_02         | E47        | TCF3    | 0.406131   | 212 |
| V\$E12_Q6         | E12        | TCF3    | 0.406131   | 212 |
| V\$E2A_Q6         | E2A        | TCF3    | 0.406131   | 212 |
| V\$HMG1Y_01       | HMG1Y      | HMGA1   | 0.604314   | 203 |
| V\$ING4_01        | ING4       | ING4    | 0.075464   | 199 |
| V\$HNF3B_Q6       | HNF-3beta  | FOXA2   | 0.0369565  | 192 |
| V\$PARP_Q3        | PARP       | PARP1   | 0.180163   | 188 |
| V\$GATA1_04       | GATA-1     | GATA1   | 0.120545   | 178 |
| V\$FOXJ2_01       | FOXJ2      | FOXJ2   | 0.278795   | 167 |
| V\$MYOGENIN_Q6    | myogenin   | MYOG    | 0.1752     | 167 |
| V\$CREM_Q6        | CREM       | CREM    | 0.56577    | 165 |
| V\$FOXM1_01       | FOXM1      | FOXM1   | 0.799265   | 162 |
| V\$E2A_Q2         | E2A        | TCF3    | 0.406131   | 159 |
| V\$TEF1_Q6_03     | TEF-1      | TEAD1   | 0.018304   | 157 |
| V\$TCF4_Q5        | TCF-4      | TCF7L2  | 0.0387432  | 153 |
| V\$IRF8_Q6        | IRF-8      | IRF8    | 0.0584665  | 150 |
| V\$OC2_Q3         | OC-2       | ONECUT2 | 0.0128522  | 149 |
| V\$FOXP3_01       | FOXP3      | FOXP3   | 0.0206458  | 146 |
| V\$TEF1_Q6        | TEF-1      | TEAD1   | 0.018304   | 145 |
| V\$TCF4_01        | TCF-4      | TCF7L2  | 0.0387432  | 142 |
| V\$AML1_01        | AML1a      | RUNX1   | 0.156987   | 141 |
| V\$YY1_02         | YY1        | YY1     | 0.135432   | 119 |
| V\$E47_01         | E47        | TCF3    | 0.406131   | 118 |
| V\$CDX1_01        | Cdx-1      | CDX1    | 0.100143   | 110 |
| V\$MYOGENIN_Q6_01 | myogenin   | MYOG    | 0.1752     | 109 |
| V\$CEBPG_Q6_01    | C/EBPgamma | CEBPG   | 0.460806   | 97  |
| V\$CIZ_01         | CIZ        | ZNF384  | 0.142596   | 86  |
| V\$HNF6_Q6        | HNF6       | ONECUT1 | 0.0505377  | 84  |
| V\$SPIB_01        | SPI-B      | SPIB    | 0.0120223  | 43  |
| V\$HSF1_01        | HSF1       | HSF1    | 0.190525   | 33  |
| V\$ZID_01         | ZID        | ZBTB6   | 0.556456   | 31  |
| V\$HSF2_01        | HSF2       | HSF2    | 0.506197   | 8   |

| Matrix_id      | transcription factor | Gene   | PCC       | Occurrence |
|----------------|----------------------|--------|-----------|------------|
| V\$AP2REP_01   | AP-2rep              | KLF12  | 0.0883173 | 299        |
| V\$GKLF_Q4     | GKLF                 | KLF4   | 0.100851  | 297        |
| V\$PEA3_Q6     | PEA3                 | ETV4   | 0.122104  | 294        |
| V\$PARP_Q4     | PARP                 | PARP1  | 0.156797  | 294        |
| V\$P300_01     | p300                 | EP300  | 0.0249685 | 289        |
| V\$TBP_Q6      | TBP                  | TBP    | 0.788573  | 266        |
| V\$SOX9_Q4     | SOX9                 | SOX9   | 0.60576   | 256        |
| V\$NFAT4_Q3    | NF-AT4               | NFATC3 | 0.0352869 | 252        |
| V\$YY1_01      | YY1                  | YY1    | 0.109669  | 251        |
| V\$ETS1_B      | c-Ets-1              | ETS1   | 0.0951685 | 244        |
| V\$HNF4A_Q6_01 | HNF-4alpha           | HNF4A  | 0.033607  | 238        |
| V\$DLX5_01     | dlx5                 | DLX5   | 0.315905  | 237        |
| V\$SOX5_01     | SOX5                 | SOX5   | 0.609371  | 227        |
| V\$SOX9_B1     | SOX9                 | SOX9   | 0.60576   | 226        |
| V\$YY1_Q6      | YY1                  | YY1    | 0.109669  | 223        |
| V\$YY1_Q6_02   | YY1                  | YY1    | 0.109669  | 212        |
| V\$GATA6_01    | GATA-6               | GATA6  | 0.03567   | 205        |
| V\$GATA1_06    | GATA-1               | GATA1  | 0.0818286 | 205        |
| V\$GATA1_05    | GATA-1               | GATA1  | 0.0818286 | 205        |
| V\$GATA1_02    | GATA-1               | GATA1  | 0.0818286 | 204        |
| V\$SRY_02      | SRY                  | SRY    | 0.0843625 | 200        |
| V\$ERBETA_Q5   | ER-beta              | ESR2   | 0.248456  | 193        |
| V\$E2A_Q6      | E2A                  | TCF3   | 0.381515  | 191        |
| V\$E47_02      | E47                  | TCF3   | 0.381515  | 191        |
| V\$E12_Q6      | E12                  | TCF3   | 0.381515  | 191        |
| V\$HMG1Y_01    | HMG1Y                | HMGA1  | 0.574802  | 187        |
| V\$ING4_01     | ING4                 | ING4   | 0.0567677 | 185        |
| V\$PARP_Q3     | PARP                 | PARP1  | 0.156797  | 169        |
| V\$GATA1_04    | GATA-1               | GATA1  | 0.0818286 | 165        |
| V\$NFAT2_Q5    | NF-AT2               | NFATC1 | 0.120848  | 160        |
| V\$YY1_Q6_03   | YY1                  | YY1    | 0.109669  | 159        |
| V\$MYOGENIN_Q6 | myogenin             | MYOG   | 0.170496  | 153        |
| V\$FOXM1_01    | FOXM1                | FOXM1  | 0.777291  | 149        |
| V\$FOXJ2_01    | FOXJ2                | FOXJ2  | 0.273451  | 149        |
| V\$E2A_Q2      | E2A                  | TCF3   | 0.381515  | 144        |
| V\$TEF1_Q6_03  | TEF-1                | TEAD1  | 0.0151646 | 144        |
| V\$IRF8_Q6     | IRF-8                | IRF8   | 0.0456705 | 140        |
| V\$TCF4_01     | TCF-4                | TCF7L2 | 0.0255368 | 133        |
| V\$FOXP3_01    | FOXP3                | FOXP3  | 0.0262323 | 132        |
| V\$TEF1_Q6     | TEF-1                | TEAD1  | 0.0151646 | 131        |
| V\$WT1_Q6      | WT1                  | WT1    | 0.203131  | 111        |
| V\$MAZ_Q6_01   | MAZ                  | MAZ    | 0.333863  | 108        |
| V\$DAX1_01     | Dax1                 | NR0B1  | 0.592752  | 107        |

|                   |            |              |            |     |
|-------------------|------------|--------------|------------|-----|
| V\$ZABC1_01       | ZABC1      | ZNF217       | 0.0911128  | 101 |
| V\$CDX1_01        | Cdx-1      | CDX1         | 0.0912888  | 100 |
| V\$MYOGENIN_Q6_01 | myogenin   | MYOG         | 0.170496   | 99  |
| V\$CEBPG_Q6_01    | C/EBPgamma | CEBPG        | 0.4263     | 84  |
| V\$HNF6_Q6        | HNF6       | ONECUT1      | 0.0872916  | 79  |
| V\$CIZ_01         | CIZ        | ZNF384       | 0.151928   | 77  |
| V\$TR4_Q2         | TR4        | NR2C2        | 0.0944493  | 76  |
| V\$HOX13_02       | HOXA5      | HOXA5        | 0.00250656 | 73  |
| V\$YY1_03         | YY1        | YY1          | 0.109669   | 64  |
| V\$STAT4_Q5       | STAT4      | STAT4        | 0.215562   | 63  |
| V\$HOXB8_01       | HOXB8      | HOXB8        | 0.262687   | 60  |
| V\$CEBPG_Q6       | C/EBPgamma | CEBPG        | 0.4263     | 51  |
| V\$HNF1B_01       | HNF-1beta  | HNF1B        | 0.0211581  | 42  |
| V\$OCT2_01        |            | 2-Oct POU2F2 | 0.049126   | 34  |
| V\$RREB1_01       | RREB-1     | RREB1        | 0.125111   | 28  |
| V\$RORA1_01       | RORalpha1  | RORA         | 0.376472   | 28  |
| V\$NKX3A_02       | Nkx3A      | NKX3-1       | 0.0765738  | 28  |
| V\$DMRT1_01       | DMRT1      | DMRT1        | 0.951294   | 9   |

hsa-mir-509-2

| Matrix_id      | transcription factor | Gene   | PCC       | Occurrence |
|----------------|----------------------|--------|-----------|------------|
| V\$AP2REP_01   | AP-2rep              | KLF12  | 0.0883173 | 299        |
| V\$GKLF_Q4     | GKLF                 | KLF4   | 0.100851  | 297        |
| V\$PEA3_Q6     | PEA3                 | ETV4   | 0.122104  | 294        |
| V\$PARP_Q4     | PARP                 | PARP1  | 0.156797  | 294        |
| V\$P300_01     | p300                 | EP300  | 0.0249685 | 289        |
| V\$TBP_Q6      | TBP                  | TBP    | 0.788573  | 266        |
| V\$SOX9_Q4     | SOX9                 | SOX9   | 0.60576   | 256        |
| V\$NFAT4_Q3    | NF-AT4               | NFATC3 | 0.0352869 | 252        |
| V\$YY1_01      | YY1                  | YY1    | 0.109669  | 251        |
| V\$ETS1_B      | c-Ets-1              | ETS1   | 0.0951685 | 244        |
| V\$HNF4A_Q6_01 | HNF-4alpha           | HNF4A  | 0.033607  | 238        |
| V\$DLX5_01     | dlx5                 | DLX5   | 0.315905  | 237        |
| V\$SOX5_01     | SOX5                 | SOX5   | 0.609371  | 227        |
| V\$SOX9_B1     | SOX9                 | SOX9   | 0.60576   | 226        |
| V\$YY1_Q6      | YY1                  | YY1    | 0.109669  | 223        |
| V\$YY1_Q6_02   | YY1                  | YY1    | 0.109669  | 212        |
| V\$GATA6_01    | GATA-6               | GATA6  | 0.03567   | 205        |
| V\$GATA1_06    | GATA-1               | GATA1  | 0.0818286 | 205        |
| V\$GATA1_05    | GATA-1               | GATA1  | 0.0818286 | 205        |
| V\$GATA1_02    | GATA-1               | GATA1  | 0.0818286 | 204        |
| V\$SRY_02      | SRY                  | SRY    | 0.0843625 | 200        |

|                   |            |              |            |     |
|-------------------|------------|--------------|------------|-----|
| V\$ERBETA_Q5      | ER-beta    | ESR2         | 0.248456   | 193 |
| V\$E2A_Q6         | E2A        | TCF3         | 0.381515   | 191 |
| V\$E47_Q2         | E47        | TCF3         | 0.381515   | 191 |
| V\$E12_Q6         | E12        | TCF3         | 0.381515   | 191 |
| V\$HMGIIY_Q1      | HMGIIY     | HMGA1        | 0.574802   | 187 |
| V\$ING4_Q1        | ING4       | ING4         | 0.0567677  | 185 |
| V\$PARP_Q3        | PARP       | PARP1        | 0.156797   | 169 |
| V\$GATA1_Q4       | GATA-1     | GATA1        | 0.0818286  | 165 |
| V\$NFAT2_Q5       | NF-AT2     | NFATC1       | 0.120848   | 160 |
| V\$YY1_Q6_Q3      | YY1        | YY1          | 0.109669   | 159 |
| V\$MYOGENIN_Q6    | myogenin   | MYOG         | 0.170496   | 153 |
| V\$FOXMI_Q1       | FOXMI      | FOXMI        | 0.777291   | 149 |
| V\$FOXJ2_Q1       | FOXJ2      | FOXJ2        | 0.273451   | 149 |
| V\$E2A_Q2         | E2A        | TCF3         | 0.381515   | 144 |
| V\$TEF1_Q6_Q3     | TEF-1      | TEAD1        | 0.0151646  | 144 |
| V\$IRF8_Q6        | IRF-8      | IRF8         | 0.0456705  | 140 |
| V\$TCF4_Q1        | TCF-4      | TCF7L2       | 0.0255368  | 133 |
| V\$FOXP3_Q1       | FOXP3      | FOXP3        | 0.0262323  | 132 |
| V\$TEF1_Q6        | TEF-1      | TEAD1        | 0.0151646  | 131 |
| V\$WT1_Q6         | WT1        | WT1          | 0.203131   | 111 |
| V\$MAZ_Q6_Q1      | MAZ        | MAZ          | 0.333863   | 108 |
| V\$DAX1_Q1        | Dax1       | NR0B1        | 0.592752   | 107 |
| V\$ZABC1_Q1       | ZABC1      | ZNF217       | 0.0911128  | 101 |
| V\$CDX1_Q1        | Cdx-1      | CDX1         | 0.0912888  | 100 |
| V\$MYOGENIN_Q6_Q1 | myogenin   | MYOG         | 0.170496   | 99  |
| V\$CEBPG_Q6_Q1    | C/EBPgamma | CEBPG        | 0.4263     | 84  |
| V\$HNF6_Q6        | HNF6       | ONECUT1      | 0.0872916  | 79  |
| V\$CIZ_Q1         | CIZ        | ZNF384       | 0.151928   | 77  |
| V\$TR4_Q2         | TR4        | NR2C2        | 0.0944493  | 76  |
| V\$HOX13_Q2       | HOXA5      | HOXA5        | 0.00250656 | 73  |
| V\$YY1_Q3         | YY1        | YY1          | 0.109669   | 64  |
| V\$STAT4_Q5       | STAT4      | STAT4        | 0.215562   | 63  |
| V\$HOXB8_Q1       | HOXB8      | HOXB8        | 0.262687   | 60  |
| V\$CEBPG_Q6       | C/EBPgamma | CEBPG        | 0.4263     | 51  |
| V\$HNF1B_Q1       | HNF-1beta  | HNF1B        | 0.0211581  | 42  |
| V\$OCT2_Q1        |            | 2-Oct POU2F2 | 0.049126   | 34  |
| V\$RREB1_Q1       | RREB-1     | RREB1        | 0.125111   | 28  |
| V\$RORA1_Q1       | RORalpha1  | RORA         | 0.376472   | 28  |
| V\$NKX3A_Q2       | Nkx3A      | NKX3-1       | 0.0765738  | 28  |
| V\$DMRT1_Q1       | DMRT1      | DMRT1        | 0.951294   | 9   |

hsa-mir-509-3

| Matrix_id | transcription factor | Gene | PCC | Occurrence |
|-----------|----------------------|------|-----|------------|
|-----------|----------------------|------|-----|------------|

|                |            |        |           |     |
|----------------|------------|--------|-----------|-----|
| V\$AP2REP_01   | AP-2rep    | KLF12  | 0.0883173 | 299 |
| V\$GKLF_Q4     | GKLF       | KLF4   | 0.100851  | 297 |
| V\$PEA3_Q6     | PEA3       | ETV4   | 0.122104  | 294 |
| V\$PARP_Q4     | PARP       | PARP1  | 0.156797  | 294 |
| V\$P300_01     | p300       | EP300  | 0.0249685 | 289 |
| V\$TBP_Q6      | TBP        | TBP    | 0.788573  | 266 |
| V\$SOX9_Q4     | SOX9       | SOX9   | 0.60576   | 256 |
| V\$NFAT4_Q3    | NF-AT4     | NFATC3 | 0.0352869 | 252 |
| V\$YY1_01      | YY1        | YY1    | 0.109669  | 251 |
| V\$ETS1_B      | c-Ets-1    | ETS1   | 0.0951685 | 244 |
| V\$HNF4A_Q6_01 | HNF-4alpha | HNF4A  | 0.033607  | 238 |
| V\$DLX5_01     | dlx5       | DLX5   | 0.315905  | 237 |
| V\$SOX5_01     | SOX5       | SOX5   | 0.609371  | 227 |
| V\$SOX9_B1     | SOX9       | SOX9   | 0.60576   | 226 |
| V\$YY1_Q6      | YY1        | YY1    | 0.109669  | 223 |
| V\$YY1_Q6_02   | YY1        | YY1    | 0.109669  | 212 |
| V\$GATA6_01    | GATA-6     | GATA6  | 0.03567   | 205 |
| V\$GATA1_06    | GATA-1     | GATA1  | 0.0818286 | 205 |
| V\$GATA1_05    | GATA-1     | GATA1  | 0.0818286 | 205 |
| V\$GATA1_02    | GATA-1     | GATA1  | 0.0818286 | 204 |
| V\$SRY_02      | SRY        | SRY    | 0.0843625 | 200 |
| V\$ERBETA_Q5   | ER-beta    | ESR2   | 0.248456  | 193 |
| V\$E2A_Q6      | E2A        | TCF3   | 0.381515  | 191 |
| V\$E47_02      | E47        | TCF3   | 0.381515  | 191 |
| V\$E12_Q6      | E12        | TCF3   | 0.381515  | 191 |
| V\$HMGIIY_01   | HMGIIY     | HMGAI1 | 0.574802  | 187 |
| V\$ING4_01     | ING4       | ING4   | 0.0567677 | 185 |
| V\$PARP_Q3     | PARP       | PARP1  | 0.156797  | 169 |
| V\$GATA1_04    | GATA-1     | GATA1  | 0.0818286 | 165 |
| V\$NFAT2_Q5    | NF-AT2     | NFATC1 | 0.120848  | 160 |
| V\$YY1_Q6_03   | YY1        | YY1    | 0.109669  | 159 |
| V\$MYOGENIN_Q6 | myogenin   | MYOG   | 0.170496  | 153 |
| V\$FOXM1_01    | FOXM1      | FOXM1  | 0.777291  | 149 |
| V\$FOXJ2_01    | FOXJ2      | FOXJ2  | 0.273451  | 149 |
| V\$E2A_Q2      | E2A        | TCF3   | 0.381515  | 144 |
| V\$TEF1_Q6_03  | TEF-1      | TEAD1  | 0.0151646 | 144 |
| V\$IRF8_Q6     | IRF-8      | IRF8   | 0.0456705 | 140 |
| V\$TCF4_01     | TCF-4      | TCF7L2 | 0.0255368 | 133 |
| V\$FOXP3_01    | FOXP3      | FOXP3  | 0.0262323 | 132 |
| V\$TEF1_Q6     | TEF-1      | TEAD1  | 0.0151646 | 131 |
| V\$WT1_Q6      | WT1        | WT1    | 0.203131  | 111 |
| V\$MAZ_Q6_01   | MAZ        | MAZ    | 0.333863  | 108 |
| V\$DAX1_01     | Dax1       | NR0B1  | 0.592752  | 107 |
| V\$ZABC1_01    | ZABC1      | ZNF217 | 0.0911128 | 101 |
| V\$CDX1_01     | Cdx-1      | CDX1   | 0.0912888 | 100 |

|                   |            |              |            |    |
|-------------------|------------|--------------|------------|----|
| V\$MYOGENIN_Q6_01 | myogenin   | MYOG         | 0.170496   | 99 |
| V\$CEBPG_Q6_01    | C/EBPgamma | CEBPG        | 0.4263     | 84 |
| V\$HNF6_Q6        | HNF6       | ONECUT1      | 0.0872916  | 79 |
| V\$CIZ_01         | CIZ        | ZNF384       | 0.151928   | 77 |
| V\$TR4_Q2         | TR4        | NR2C2        | 0.0944493  | 76 |
| V\$HOX13_Q2       | HOXA5      | HOXA5        | 0.00250656 | 73 |
| V\$YY1_Q3         | YY1        | YY1          | 0.109669   | 64 |
| V\$STAT4_Q5       | STAT4      | STAT4        | 0.215562   | 63 |
| V\$HOXB8_Q1       | HOXB8      | HOXB8        | 0.262687   | 60 |
| V\$CEBPG_Q6       | C/EBPgamma | CEBPG        | 0.4263     | 51 |
| V\$HNF1B_Q1       | HNF-1beta  | HNF1B        | 0.0211581  | 42 |
| V\$OCT2_Q1        |            | 2-Oct POU2F2 | 0.049126   | 34 |
| V\$RREB1_Q1       | RREB-1     | RREB1        | 0.125111   | 28 |
| V\$RORA1_Q1       | RORalpha1  | RORA         | 0.376472   | 28 |
| V\$NKX3A_Q2       | Nkx3A      | NKX3-1       | 0.0765738  | 28 |
| V\$DMRT1_Q1       | DMRT1      | DMRT1        | 0.951294   | 9  |

hsa-mir-510

| Matrix_id      | transcription factor | Gene   | PCC       | Occurrence |
|----------------|----------------------|--------|-----------|------------|
| V\$AP2REP_Q1   | AP-2rep              | KLF12  | 0.100422  | 332        |
| V\$GKLF_Q4     | GKLF                 | KLF4   | 0.116949  | 332        |
| V\$PEA3_Q6     | PEA3                 | ETV4   | 0.112262  | 327        |
| V\$PARP_Q4     | PARP                 | PARP1  | 0.185538  | 327        |
| V\$P300_Q1     | p300                 | EP300  | 0.0475435 | 319        |
| V\$TBP_Q6      | TBP                  | TBP    | 0.807544  | 292        |
| V\$SOX9_Q4     | SOX9                 | SOX9   | 0.63498   | 288        |
| V\$NFAT4_Q3    | NF-AT4               | NFATC3 | 0.0621294 | 277        |
| V\$YY1_Q1      | YY1                  | YY1    | 0.139398  | 277        |
| V\$ETS1_B      | c-Ets-1              | ETS1   | 0.139731  | 276        |
| V\$HNF4A_Q6_01 | HNF-4alpha           | HNF4A  | 0.0348707 | 265        |
| V\$DLX5_Q1     | dlx5                 | DLX5   | 0.306603  | 262        |
| V\$SOX5_Q1     | SOX5                 | SOX5   | 0.631459  | 256        |
| V\$SOX9_B1     | SOX9                 | SOX9   | 0.63498   | 255        |
| V\$YY1_Q6      | YY1                  | YY1    | 0.139398  | 249        |
| V\$YY1_Q6_Q2   | YY1                  | YY1    | 0.139398  | 238        |
| V\$GATA1_Q6    | GATA-1               | GATA1  | 0.127105  | 228        |
| V\$GATA1_Q5    | GATA-1               | GATA1  | 0.127105  | 228        |
| V\$SRY_Q2      | SRY                  | SRY    | 0.101361  | 226        |
| V\$GATA1_Q2    | GATA-1               | GATA1  | 0.127105  | 225        |
| V\$ERBETA_Q5   | ER-beta              | ESR2   | 0.257316  | 213        |
| V\$E2A_Q6      | E2A                  | TCF3   | 0.414266  | 213        |
| V\$E47_Q2      | E47                  | TCF3   | 0.414266  | 213        |

|                   |            |              |           |     |
|-------------------|------------|--------------|-----------|-----|
| V\$E12_Q6         | E12        | TCF3         | 0.414266  | 213 |
| V\$HMGYIY_01      | HMGYIY     | HMGA1        | 0.610782  | 206 |
| V\$ING4_01        | ING4       | ING4         | 0.0815857 | 202 |
| V\$HNF3B_Q6       | HNF-3beta  | FOXA2        | 0.0431588 | 195 |
| V\$PARP_Q3        | PARP       | PARP1        | 0.185538  | 190 |
| V\$GATA1_04       | GATA-1     | GATA1        | 0.127105  | 183 |
| V\$NFAT2_Q5       | NF-AT2     | NFATC1       | 0.14101   | 181 |
| V\$YY1_Q6_03      | YY1        | YY1          | 0.139398  | 173 |
| V\$FOXJ2_01       | FOXJ2      | FOXJ2        | 0.278522  | 170 |
| V\$MYOGENIN_Q6    | myogenin   | MYOG         | 0.182893  | 169 |
| V\$FOXM1_01       | FOXM1      | FOXM1        | 0.802362  | 163 |
| V\$TEF1_Q6_03     | TEF-1      | TEAD1        | 0.0202019 | 161 |
| V\$E2A_Q2         | E2A        | TCF3         | 0.414266  | 160 |
| V\$IRF8_Q6        | IRF-8      | IRF8         | 0.0603646 | 152 |
| V\$FOXP3_01       | FOXP3      | FOXP3        | 0.023785  | 148 |
| V\$TEF1_Q6        | TEF-1      | TEAD1        | 0.0202019 | 148 |
| V\$TCF4_01        | TCF-4      | TCF7L2       | 0.042094  | 147 |
| V\$WT1_Q6         | WT1        | WT1          | 0.208067  | 129 |
| V\$MAZ_Q6_01      | MAZ        | MAZ          | 0.369919  | 124 |
| V\$DAX1_01        | Dax1       | NR0B1        | 0.584086  | 117 |
| V\$ZABC1_01       | ZABC1      | ZNF217       | 0.107751  | 112 |
| V\$CDX1_01        | Cdx-1      | CDX1         | 0.100049  | 112 |
| V\$MYOGENIN_Q6_01 | myogenin   | MYOG         | 0.182893  | 111 |
| V\$CEBPG_Q6_01    | C/EBPgamma | CEBPG        | 0.465169  | 99  |
| V\$CIZ_01         | CIZ        | ZNF384       | 0.147374  | 87  |
| V\$HNF6_Q6        | HNF6       | ONECUT1      | 0.03957   | 86  |
| V\$TR4_Q2         | TR4        | NR2C2        | 0.111017  | 86  |
| V\$YY1_03         | YY1        | YY1          | 0.139398  | 75  |
| V\$HOXB8_01       | HOXB8      | HOXB8        | 0.298687  | 68  |
| V\$STAT4_Q5       | STAT4      | STAT4        | 0.230881  | 65  |
| V\$CEBPG_Q6       | C/EBPgamma | CEBPG        | 0.465169  | 56  |
| V\$HNF1B_01       | HNF-1beta  | HNF1B        | 0.0297195 | 47  |
| V\$OCT2_01        |            | 2-Oct POU2F2 | 0.045411  | 37  |
| V\$RREB1_01       | RREB-1     | RREB1        | 0.135226  | 34  |
| V\$NKX3A_02       | Nkx3A      | NKX3-1       | 0.0961027 | 30  |
| V\$RORA1_01       | RORalpha1  | RORA         | 0.353568  | 28  |
| V\$DMRT1_01       | DMRT1      | DMRT1        | 0.964003  | 9   |

hsa-mir-511-1

| Matrix_id  | transcription factor | Gene | PCC       | Occurrence |
|------------|----------------------|------|-----------|------------|
| V\$SPI1_Q5 | SPI1                 | SPI1 | 0.465709  | 4          |
| V\$PEA3_Q6 | PEA3                 | ETV4 | 0.0170145 | 4          |

|               |            |        |           |   |
|---------------|------------|--------|-----------|---|
| V\$YY1_Q6     | YY1        | YY1    | 0.177383  | 4 |
| V\$YY1_Q6_02  | YY1        | YY1    | 0.177383  | 4 |
| V\$MAFB_01    | MAFB       | MAFB   | 0.481216  | 4 |
| V\$ETS2_B     | c-Ets-2    | ETS2   | 0.219412  | 4 |
| V\$ELF1_Q6    | Elf-1      | ELF1   | 0.117506  | 4 |
| V\$GABPA_Q4   | GABP-alpha | GABPA  | 0.0448007 | 4 |
| V\$IRF8_Q6    | IRF-8      | IRF8   | 0.280656  | 4 |
| V\$GKLF_Q4    | GKLF       | KLF4   | 0.541425  | 4 |
| V\$CEBPA_Q6   | C/EBPalpha | CEBPA  | 0.0843088 | 4 |
| V\$SPI1_03    | SPI1       | SPI1   | 0.465709  | 4 |
| V\$P300_01    | p300       | EP300  | 0.0883388 | 4 |
| V\$TCF4_01    | TCF-4      | TCF7L2 | 0.294731  | 3 |
| V\$SREBP1_Q6  | SREBP-1    | SREBF1 | 0.525024  | 3 |
| V\$IRF7_Q3    | IRF-7      | IRF7   | 0.274642  | 3 |
| V\$CIZ_01     | CIZ        | ZNF384 | 0.0772149 | 3 |
| V\$CP2_01     | CP2        | TFCP2  | 0.211354  | 3 |
| V\$GATA3_03   | GATA-3     | GATA3  | 0.327223  | 3 |
| V\$YY1_02     | YY1        | YY1    | 0.177383  | 3 |
| V\$IRF7_01    | IRF-7      | IRF7   | 0.274642  | 3 |
| V\$FKLF_Q5    | FKLF       | KLF11  | 0.314316  | 2 |
| V\$EKLF_Q5    | EKLF       | KLF1   | 0.0212612 | 2 |
| V\$EHF_03     | EHF        | EHF    | 0.0045321 | 2 |
| V\$IRF1_Q6_01 | IRF-1      | IRF1   | 0.210435  | 2 |
| V\$EGR1_02    | EGR-1      | EGR1   | 0.142433  | 2 |
| V\$TCF4_Q5    | TCF-4      | TCF7L2 | 0.294731  | 2 |
| V\$STAT5A_Q6  | STAT5A     | STAT5A | 0.249788  | 2 |
| V\$IRF1_Q6    | IRF-1      | IRF1   | 0.210435  | 2 |
| V\$ESE1_Q3    | ESE-1      | ELF3   | 0.214527  | 2 |
| V\$ETS2_Q6    | c-Ets-2    | ETS2   | 0.219412  | 2 |
| V\$AHR_Q5     | AhR        | AHR    | 0.454223  | 2 |
| V\$MEIS1_01   | MEIS1      | MEIS1  | 0.0237784 | 2 |
| V\$SP1_01     | Sp1        | SP1    | 0.0457024 | 2 |
| V\$FLI1_02    | Fli-1      | FLI1   | 0.103015  | 1 |
| V\$HIF1A_Q6   | HIF-1alpha | HIF1A  | 0.214565  | 1 |
| V\$MAFK_Q3    | MafK       | MAFK   | 0.221987  | 1 |
| V\$STAT1_05   | STAT1      | STAT1  | 0.218824  | 1 |
| V\$ERM_02     | Erm        | ETV5   | 0.515329  | 1 |
| V\$ESE1_02    | ESE-1      | ELF3   | 0.214527  | 1 |
| V\$ERG_03     | ERG        | ERG    | 0.0423963 | 1 |
| V\$NMYC_01    | N-Myc      | MYCN   | 0.116347  | 1 |
| V\$ARNT_02    | Arnt       | ARNT   | 0.0009537 | 1 |
| V\$ARNT_01    | Arnt       | ARNT   | 0.0009537 | 1 |
| V\$ZABC1_01   | ZABC1      | ZNF217 | 0.300837  | 1 |
| V\$MAX_01     | Max        | MAX    | 0.213001  | 1 |
| V\$KLF15_Q2   | KLF15      | KLF15  | 0.216376  | 1 |
| V\$ERG_01     | ERG        | ERG    | 0.0423963 | 1 |



|             |       |       |          |   |
|-------------|-------|-------|----------|---|
| V\$STAT1_Q6 | STAT1 | STAT1 | 0.218824 | 1 |
| V\$IRF2_01  | IRF-2 | IRF2  | 0.545082 | 1 |
| V\$IRF1_01  | IRF-1 | IRF1  | 0.210435 | 1 |
| V\$YY1_03   | YY1   | YY1   | 0.177383 | 1 |

hsa-mir-511-2

| Matrix_id     | transcription factor | Gene   | PCC       | Occurrence |
|---------------|----------------------|--------|-----------|------------|
| V\$GABPA_Q4   | GABP-alpha           | GABPA  | 0.0448007 | 4          |
| V\$MAFB_01    | MAFB                 | MAFB   | 0.481216  | 4          |
| V\$IRF8_Q6    | IRF-8                | IRF8   | 0.280656  | 4          |
| V\$YY1_Q6_02  | YY1                  | YY1    | 0.177383  | 4          |
| V\$YY1_Q6     | YY1                  | YY1    | 0.177383  | 4          |
| V\$GKLF_Q4    | GKLF                 | KLF4   | 0.541425  | 4          |
| V\$ELF1_Q6    | Elf-1                | ELF1   | 0.117506  | 4          |
| V\$CEBPA_Q6   | C/EBPalpha           | CEBPA  | 0.0843088 | 4          |
| V\$PEA3_Q6    | PEA3                 | ETV4   | 0.0170145 | 4          |
| V\$ETS2_B     | c-Ets-2              | ETS2   | 0.219412  | 4          |
| V\$P300_01    | p300                 | EP300  | 0.0883388 | 4          |
| V\$SPI1_03    | SPI1                 | SPI1   | 0.465709  | 4          |
| V\$SPI1_Q5    | SPI1                 | SPI1   | 0.465709  | 4          |
| V\$CP2_01     | CP2                  | TFCP2  | 0.211354  | 3          |
| V\$TCF4_01    | TCF-4                | TCF7L2 | 0.294731  | 3          |
| V\$YY1_02     | YY1                  | YY1    | 0.177383  | 3          |
| V\$SREBP1_Q6  | SREBP-1              | SREBF1 | 0.525024  | 3          |
| V\$IRF7_Q3    | IRF-7                | IRF7   | 0.274642  | 3          |
| V\$CIZ_01     | CIZ                  | ZNF384 | 0.0772149 | 3          |
| V\$IRF7_01    | IRF-7                | IRF7   | 0.274642  | 3          |
| V\$FKLF_Q5    | FKLF                 | KLF11  | 0.314316  | 2          |
| V\$EGR1_02    | EGR-1                | EGR1   | 0.142433  | 2          |
| V\$STAT5A_Q6  | STAT5A               | STAT5A | 0.249788  | 2          |
| V\$EKLF_Q5    | EKLF                 | KLF1   | 0.0212612 | 2          |
| V\$EHF_03     | EHF                  | EHF    | 0.0045321 | 2          |
| V\$IRF1_Q6_01 | IRF-1                | IRF1   | 0.210435  | 2          |
| V\$IRF1_Q6    | IRF-1                | IRF1   | 0.210435  | 2          |
| V\$MEIS1_01   | MEIS1                | MEIS1  | 0.0237784 | 2          |
| V\$AHR_Q5     | AhR                  | AHR    | 0.454223  | 2          |
| V\$TCF4_Q5    | TCF-4                | TCF7L2 | 0.294731  | 2          |
| V\$ETS2_Q6    | c-Ets-2              | ETS2   | 0.219412  | 2          |
| V\$ESE1_Q3    | ESE-1                | ELF3   | 0.214527  | 2          |
| V\$SP1_01     | Sp1                  | SP1    | 0.0457024 | 2          |
| V\$IRF1_01    | IRF-1                | IRF1   | 0.210435  | 1          |
| V\$NMYC_01    | N-Myc                | MYCN   | 0.116347  | 1          |

|             |            |        |           |   |
|-------------|------------|--------|-----------|---|
| V\$STAT1_05 | STAT1      | STAT1  | 0.218824  | 1 |
| V\$ESE1_02  | ESE-1      | ELF3   | 0.214527  | 1 |
| V\$ZABC1_01 | ZABC1      | ZNF217 | 0.300837  | 1 |
| V\$ERG_03   | ERG        | ERG    | 0.0423963 | 1 |
| V\$ERM_02   | Erm        | ETV5   | 0.515329  | 1 |
| V\$FLI1_02  | Fli-1      | FLI1   | 0.103015  | 1 |
| V\$MAFK_Q3  | MafK       | MAFK   | 0.221987  | 1 |
| V\$HIF1A_Q6 | HIF-1alpha | HIF1A  | 0.214565  | 1 |
| V\$IRF2_01  | IRF-2      | IRF2   | 0.545082  | 1 |
| V\$MAX_01   | Max        | MAX    | 0.213001  | 1 |
| V\$ARNT_01  | Arnt       | ARNT   | 0.0009537 | 1 |
| V\$ARNT_02  | Arnt       | ARNT   | 0.0009537 | 1 |
| V\$STAT1_Q6 | STAT1      | STAT1  | 0.218824  | 1 |
| V\$ERG_01   | ERG        | ERG    | 0.0423963 | 1 |
| V\$KLF15_Q2 | KLF15      | KLF15  | 0.216376  | 1 |
| V\$YY1_03   | YY1        | YY1    | 0.177383  | 1 |

hsa-mir-512-1

| Matrix_id      | transcription factor | Gene  | PCC        | Occurrence |
|----------------|----------------------|-------|------------|------------|
| V\$PUR1_Q4     | PUR1                 | PURA  | 0.158745   | 261        |
| V\$PEA3_Q6     | PEA3                 | ETV4  | 0.0981089  | 255        |
| V\$PARP_Q4     | PARP                 | PARP1 | 0.0979871  | 252        |
| V\$GKLF_Q4     | GKLF                 | KLF4  | 0.565909   | 243        |
| V\$MAFB_01     | MAFB                 | MAFB  | 0.297844   | 240        |
| V\$P300_01     | p300                 | EP300 | 0.348238   | 234        |
| V\$ETS1_B      | c-Ets-1              | ETS1  | 0.0654302  | 229        |
| V\$CETS1_Q6    | C-ets-1              | ETS1  | 0.0654302  | 223        |
| V\$SMAD4_Q6_01 | Smad4                | SMAD4 | 0.306641   | 222        |
| V\$GABPA_Q4    | GABP-alpha           | GABPA | 0.365113   | 211        |
| V\$GATA1_01    | GATA-1               | GATA1 | 0.0152112  | 210        |
| V\$TBP_Q6      | TBP                  | TBP   | 0.156064   | 201        |
| V\$GR_Q6       | GR                   | NR3C1 | 0.155247   | 199        |
| V\$TBX5_02     | TBX5                 | TBX5  | 0.0774492  | 199        |
| V\$YY1_01      | YY1                  | YY1   | 0.365515   | 195        |
| V\$AML1_Q6     | AML1                 | RUNX1 | 0.00034091 | 186        |
| V\$DLX5_01     | dlx5                 | DLX5  | 0.691916   | 178        |
| V\$YY1_Q6_02   | YY1                  | YY1   | 0.365515   | 176        |
| V\$YY1_Q6      | YY1                  | YY1   | 0.365515   | 175        |
| V\$AHR_Q5      | AhR                  | AHR   | 0.964949   | 168        |
| V\$TBX5_01     | TBX5                 | TBX5  | 0.0774492  | 158        |
| V\$ERBETA_Q5   | ER-beta              | ESR2  | 0.0420443  | 158        |
| V\$ING4_01     | ING4                 | ING4  | 0.113542   | 157        |

|              |            |        |            |     |
|--------------|------------|--------|------------|-----|
| V\$PARP_Q3   | PARP       | PARP1  | 0.0979871  | 157 |
| V\$SP1_Q6    | Sp1        | SP1    | 0.347444   | 155 |
| V\$HMG1Y_Q1  | HMG1Y      | HMG1A1 | 0.342856   | 145 |
| V\$FKLF_Q5   | FKLF       | KLF11  | 0.238573   | 145 |
| V\$SREBP1_Q6 | SREBP-1    | SREBF1 | 0.13659    | 134 |
| V\$SP1_Q1    | Sp1        | SP1    | 0.347444   | 133 |
| V\$ELK1_Q2   | Elk-1      | ELK1   | 0.0191925  | 133 |
| V\$CMAF_Q1   | c-Maf      | MAF    | 0.0922767  | 124 |
| V\$ELK1_Q6   | ELK-1      | ELK1   | 0.0191925  | 122 |
| V\$CEBPE_Q6  | CEBPE      | CEBPE  | 0.0271494  | 120 |
| V\$GR_Q1     | GR         | NR3C1  | 0.155247   | 117 |
| V\$PITX2_Q2  | Pitx2      | PITX2  | 0.429884   | 109 |
| V\$ESE1_Q3   | ESE-1      | ELF3   | 0.103228   | 108 |
| V\$AML1_Q1   | AML1a      | RUNX1  | 0.00034091 | 104 |
| V\$PITX2_Q1  | PITX2      | PITX2  | 0.429884   | 103 |
| V\$CP2_Q1    | CP2        | TFCP2  | 0.575131   | 103 |
| V\$ZABC1_Q1  | ZABC1      | ZNF217 | 0.864941   | 102 |
| V\$CEBPD_Q6  | C/EBPdelta | CEBPD  | 0.435924   | 97  |
| V\$SP2_Q1    | SP2        | SP2    | 0.144037   | 97  |
| V\$AML1_Q4   | AML1       | RUNX1  | 0.00034091 | 90  |
| V\$HBP1_Q2   | hbp1       | HBP1   | 0.667881   | 89  |
| V\$CEBPB_Q2  | C/EBPbeta  | CEBPB  | 0.59578    | 88  |
| V\$ESE1_Q2   | ESE-1      | ELF3   | 0.103228   | 81  |
| V\$CEBPB_Q6  | C/EBPbeta  | CEBPB  | 0.59578    | 76  |
| V\$YY1_Q2    | YY1        | YY1    | 0.365515   | 73  |
| V\$CEBPA_Q1  | C/EBPalpha | CEBPA  | 0.07053    | 71  |
| V\$E2F4_Q6   | E2F-4      | E2F4   | 0.0653664  | 64  |
| V\$ERG_Q3    | ERG        | ERG    | 0.33733    | 58  |
| V\$YY1_Q3    | YY1        | YY1    | 0.365515   | 57  |
| V\$CIZ_Q1    | CIZ        | ZNF384 | 0.0810194  | 55  |
| V\$CEBPB_Q1  | C/EBPbeta  | CEBPB  | 0.59578    | 45  |
| V\$ERM_Q2    | Erm        | ETV5   | 0.535537   | 40  |
| V\$ERR3_Q2   | ERR3       | ESRRG  | 0.469832   | 38  |
| V\$ERG_Q1    | ERG        | ERG    | 0.33733    | 38  |
| V\$P53_Q4    | p53        | TP53   | 0.605023   | 7   |

hsa-mir-512-2

| Matrix_id  | transcription factor | Gene  | PCC       | Occurrence |
|------------|----------------------|-------|-----------|------------|
| V\$PUR1_Q4 | PUR1                 | PURA  | 0.158745  | 261        |
| V\$PARP_Q4 | PARP                 | PARP1 | 0.0979871 | 252        |
| V\$GKLF_Q4 | GKLF                 | KLF4  | 0.565909  | 243        |
| V\$MAFB_Q1 | MAFB                 | MAFB  | 0.297844  | 240        |

|                |            |        |            |     |
|----------------|------------|--------|------------|-----|
| V\$P300_01     | p300       | EP300  | 0.348238   | 234 |
| V\$SMAD4_Q6_01 | Smad4      | SMAD4  | 0.306641   | 222 |
| V\$TBX5_02     | TBX5       | TBX5   | 0.0774492  | 199 |
| V\$GR_Q6       | GR         | NR3C1  | 0.155247   | 199 |
| V\$YY1_01      | YY1        | YY1    | 0.365515   | 195 |
| V\$AML1_Q6     | AML1       | RUNX1  | 0.00034091 | 186 |
| V\$DLX5_01     | dlx5       | DLX5   | 0.691916   | 178 |
| V\$YY1_Q6_02   | YY1        | YY1    | 0.365515   | 176 |
| V\$YY1_Q6      | YY1        | YY1    | 0.365515   | 175 |
| V\$GATA1_02    | GATA-1     | GATA1  | 0.0152112  | 172 |
| V\$GATA1_05    | GATA-1     | GATA1  | 0.0152112  | 165 |
| V\$GATA2_02    | GATA-2     | GATA2  | 0.693821   | 165 |
| V\$GATA1_06    | GATA-1     | GATA1  | 0.0152112  | 165 |
| V\$TBX5_01     | TBX5       | TBX5   | 0.0774492  | 158 |
| V\$PARP_Q3     | PARP       | PARP1  | 0.0979871  | 157 |
| V\$ING4_01     | ING4       | ING4   | 0.113542   | 157 |
| V\$SP1_Q6      | Sp1        | SP1    | 0.347444   | 155 |
| V\$GATA1_04    | GATA-1     | GATA1  | 0.0152112  | 147 |
| V\$HMG1Y_01    | HMG1Y      | HMGA1  | 0.342856   | 145 |
| V\$GATA3_02    | GATA-3     | GATA3  | 0.911284   | 141 |
| V\$ARNT_01     | Arnt       | ARNT   | 0.331932   | 132 |
| V\$CEBPE_Q6    | CEBPE      | CEBPE  | 0.0271494  | 120 |
| V\$GR_01       | GR         | NR3C1  | 0.155247   | 117 |
| V\$TCF4_01     | TCF-4      | TCF7L2 | 0.465518   | 116 |
| V\$PITX2_Q2    | Pitx2      | PITX2  | 0.429884   | 109 |
| V\$TCF4_Q5     | TCF-4      | TCF7L2 | 0.465518   | 108 |
| V\$IRF7_Q3     | IRF-7      | IRF7   | 0.129484   | 106 |
| V\$FOXJ2_01    | FOXJ2      | FOXJ2  | 0.0449965  | 104 |
| V\$AML1_01     | AML1a      | RUNX1  | 0.00034091 | 104 |
| V\$CP2_01      | CP2        | TFCP2  | 0.575131   | 103 |
| V\$PITX2_01    | PITX2      | PITX2  | 0.429884   | 103 |
| V\$CEBPD_Q6    | C/EBPdelta | CEBPD  | 0.435924   | 97  |
| V\$GATA3_03    | GATA-3     | GATA3  | 0.911284   | 91  |
| V\$AML1_Q4     | AML1       | RUNX1  | 0.00034091 | 90  |
| V\$STAT3_03    | STAT3      | STAT3  | 0.14519    | 77  |
| V\$CEBPB_Q6    | C/EBPbeta  | CEBPB  | 0.59578    | 76  |
| V\$FOXO4_02    | FOXO4      | FOXO4  | 0.95676    | 74  |
| V\$CEBPA_01    | C/EBPalpha | CEBPA  | 0.07053    | 71  |
| V\$P53_02      | p53        | TP53   | 0.605023   | 66  |
| V\$IRF1_Q6_01  | IRF-1      | IRF1   | 0.337987   | 48  |
| V\$CDP_04      | CDP        | CUX1   | 0.361793   | 38  |
| V\$GRE_C       | GR         | NR3C1  | 0.155247   | 16  |

| Matrix_id      | transcription factor | Gene   | PCC        | Occurrence |
|----------------|----------------------|--------|------------|------------|
| V\$AP2REP_01   | AP-2rep              | KLF12  | 0.104783   | 339        |
| V\$GKLF_Q4     | GKLF                 | KLF4   | 0.135731   | 338        |
| V\$PEA3_Q6     | PEA3                 | ETV4   | 0.105244   | 335        |
| V\$P300_01     | p300                 | EP300  | 0.06091    | 326        |
| V\$ZIC3_01     | Zic3                 | ZIC3   | 0.364024   | 300        |
| V\$SOX9_Q4     | SOX9                 | SOX9   | 0.650877   | 295        |
| V\$GATA1_01    | GATA-1               | GATA1  | 0.166628   | 290        |
| V\$CETS1_Q6    | C-ets-1              | ETS1   | 0.169672   | 289        |
| V\$NFAT4_Q3    | NF-AT4               | NFATC3 | 0.0812033  | 283        |
| V\$ETS1_B      | c-Ets-1              | ETS1   | 0.169672   | 282        |
| V\$YY1_01      | YY1                  | YY1    | 0.158969   | 282        |
| V\$TBX5_02     | TBX5                 | TBX5   | 0.0305597  | 277        |
| V\$GABPA_Q4    | GABP-alpha           | GABPA  | 0.0261348  | 276        |
| V\$HNF4A_Q6_01 | HNF-4alpha           | HNF4A  | 0.00676163 | 270        |
| V\$YY1_Q6      | YY1                  | YY1    | 0.158969   | 257        |
| V\$AML1_Q6     | AML1                 | RUNX1  | 0.17817    | 252        |
| V\$YY1_Q6_02   | YY1                  | YY1    | 0.158969   | 245        |
| V\$SP1_Q6      | Sp1                  | SP1    | 0.0292724  | 240        |
| V\$NKX32_01    | Nkx3-2               | NKX3-2 | 0.32374    | 227        |
| V\$TBX5_01     | TBX5                 | TBX5   | 0.0305597  | 225        |
| V\$PITX3_Q2    | PITX3                | PITX3  | 0.0419136  | 221        |
| V\$MAZ_Q6      | MAZ                  | MAZ    | 0.380747   | 221        |
| V\$E12_Q6      | E12                  | TCF3   | 0.433743   | 218        |
| V\$ERBETA_Q5   | ER-beta              | ESR2   | 0.256708   | 218        |
| V\$E2A_Q6      | E2A                  | TCF3   | 0.433743   | 218        |
| V\$E47_02      | E47                  | TCF3   | 0.433743   | 217        |
| V\$SP1_01      | Sp1                  | SP1    | 0.0292724  | 212        |
| V\$ING4_01     | ING4                 | ING4   | 0.100046   | 208        |
| V\$SP1_Q6_01   | Sp1                  | SP1    | 0.0292724  | 208        |
| V\$ELK1_02     | Elk-1                | ELK1   | 0.259013   | 207        |
| V\$SP1_Q4_01   | Sp1                  | SP1    | 0.0292724  | 202        |
| V\$HNF3B_Q6    | HNF-3beta            | FOXA2  | 0.0794719  | 197        |
| V\$ELK1_06     | ELK-1                | ELK1   | 0.259013   | 194        |
| V\$SP1_Q2_01   | Sp1                  | SP1    | 0.0292724  | 194        |
| V\$SP1_Q2      | SP1                  | SP1    | 0.0292724  | 189        |
| V\$ERF_Q2      | ERF                  | ERF    | 0.0218276  | 180        |
| V\$MYOGENIN_Q6 | myogenin             | MYOG   | 0.182505   | 174        |
| V\$CREM_Q6     | CREM                 | CREM   | 0.528217   | 174        |
| V\$E2A_Q2      | E2A                  | TCF3   | 0.433743   | 164        |
| V\$FKLF_Q5     | FKLF                 | KLF11  | 0.314366   | 155        |
| V\$SREBP1_Q6   | SREBP-1              | SREBF1 | 0.149918   | 154        |
| V\$FOXP3_01    | FOXP3                | FOXP3  | 0.0130914  | 152        |
| V\$GABPBETA_Q3 | GABP-beta            | GABPB1 | 0.156045   | 147        |

|                   |          |        |            |     |
|-------------------|----------|--------|------------|-----|
| V\$AML1_01        | AML1a    | RUNX1  | 0.17817    | 144 |
| V\$WT1_Q6         | WT1      | WT1    | 0.209998   | 132 |
| V\$AML1_Q4        | AML1     | RUNX1  | 0.17817    | 131 |
| V\$MAZ_Q6_01      | MAZ      | MAZ    | 0.380747   | 127 |
| V\$E47_01         | E47      | TCF3   | 0.433743   | 123 |
| V\$YY1_02         | YY1      | YY1    | 0.158969   | 123 |
| V\$DAX1_01        | Dax1     | NR0B1  | 0.569677   | 118 |
| V\$MYOGENIN_Q6_01 | myogenin | MYOG   | 0.182505   | 112 |
| V\$ERM_02         | Erm      | ETV5   | 0.353231   | 97  |
| V\$ELK1_01        | Elk-1    | ELK1   | 0.259013   | 94  |
| V\$SPIB_03        | Spi-B    | SPIB   | 0.0443451  | 85  |
| V\$MATH1_Q2       | MATH1    | ATOH1  | 0.169532   | 78  |
| V\$EGR2_01        | Egr-2    | EGR2   | 0.284316   | 53  |
| V\$GLI3_Q5_01     | GLI3     | GLI3   | 0.00951285 | 31  |
| V\$SREBP1_02      | SREBP-1  | SREBF1 | 0.149918   | 28  |

hsa-mir-513a-2

| Matrix_id      | transcription factor | Gene   | PCC        | Occurrence |
|----------------|----------------------|--------|------------|------------|
| V\$AP2REP_01   | AP-2rep              | KLF12  | 0.104783   | 339        |
| V\$GKLF_Q4     | GKLF                 | KLF4   | 0.135731   | 338        |
| V\$PEA3_Q6     | PEA3                 | ETV4   | 0.105244   | 335        |
| V\$P300_01     | p300                 | EP300  | 0.06091    | 326        |
| V\$ZIC3_01     | Zic3                 | ZIC3   | 0.364024   | 300        |
| V\$SOX9_Q4     | SOX9                 | SOX9   | 0.650877   | 295        |
| V\$GATA1_01    | GATA-1               | GATA1  | 0.166628   | 290        |
| V\$CETS1_Q6    | C-ets-1              | ETS1   | 0.169672   | 289        |
| V\$NFAT4_Q3    | NF-AT4               | NFATC3 | 0.0812033  | 283        |
| V\$ETS1_B      | c-Ets-1              | ETS1   | 0.169672   | 282        |
| V\$YY1_01      | YY1                  | YY1    | 0.158969   | 282        |
| V\$TBX5_02     | TBX5                 | TBX5   | 0.0305597  | 277        |
| V\$GABPA_Q4    | GABP-alpha           | GABPA  | 0.0261348  | 276        |
| V\$HNF4A_Q6_01 | HNF-4alpha           | HNF4A  | 0.00676163 | 270        |
| V\$YY1_Q6      | YY1                  | YY1    | 0.158969   | 257        |
| V\$AML1_Q6     | AML1                 | RUNX1  | 0.17817    | 252        |
| V\$YY1_Q6_02   | YY1                  | YY1    | 0.158969   | 245        |
| V\$SP1_Q6      | Sp1                  | SP1    | 0.0292724  | 240        |
| V\$NKX32_01    | Nkx3-2               | NKX3-2 | 0.32374    | 227        |
| V\$TBX5_01     | TBX5                 | TBX5   | 0.0305597  | 225        |
| V\$PITX3_Q2    | PITX3                | PITX3  | 0.0419136  | 221        |
| V\$MAZ_Q6      | MAZ                  | MAZ    | 0.380747   | 221        |
| V\$E12_Q6      | E12                  | TCF3   | 0.433743   | 218        |
| V\$ERBETA_Q5   | ER-beta              | ESR2   | 0.256708   | 218        |

|                   |           |        |            |     |
|-------------------|-----------|--------|------------|-----|
| V\$E2A_Q6         | E2A       | TCF3   | 0.433743   | 218 |
| V\$E47_Q2         | E47       | TCF3   | 0.433743   | 217 |
| V\$SP1_Q1         | Sp1       | SP1    | 0.0292724  | 212 |
| V\$ING4_Q1        | ING4      | ING4   | 0.100046   | 208 |
| V\$SP1_Q6_Q1      | Sp1       | SP1    | 0.0292724  | 208 |
| V\$ELK1_Q2        | Elk-1     | ELK1   | 0.259013   | 207 |
| V\$SP1_Q4_Q1      | Sp1       | SP1    | 0.0292724  | 202 |
| V\$HNF3B_Q6       | HNF-3beta | FOXA2  | 0.0794719  | 197 |
| V\$ELK1_Q6        | ELK-1     | ELK1   | 0.259013   | 194 |
| V\$SP1_Q2_Q1      | Sp1       | SP1    | 0.0292724  | 194 |
| V\$SP1_Q2         | SP1       | SP1    | 0.0292724  | 189 |
| V\$ERF_Q2         | ERF       | ERF    | 0.0218276  | 180 |
| V\$MYOGENIN_Q6    | myogenin  | MYOG   | 0.182505   | 174 |
| V\$CREM_Q6        | CREM      | CREM   | 0.528217   | 174 |
| V\$E2A_Q2         | E2A       | TCF3   | 0.433743   | 164 |
| V\$FKLF_Q5        | FKLF      | KLF11  | 0.314366   | 155 |
| V\$SREBP1_Q6      | SREBP-1   | SREBF1 | 0.149918   | 154 |
| V\$FOXP3_Q1       | FOXP3     | FOXP3  | 0.0130914  | 152 |
| V\$GABPBETA_Q3    | GABP-beta | GABPB1 | 0.156045   | 147 |
| V\$AML1_Q1        | AML1a     | RUNX1  | 0.17817    | 144 |
| V\$WT1_Q6         | WT1       | WT1    | 0.209998   | 132 |
| V\$AML1_Q4        | AML1      | RUNX1  | 0.17817    | 131 |
| V\$MAZ_Q6_Q1      | MAZ       | MAZ    | 0.380747   | 127 |
| V\$E47_Q1         | E47       | TCF3   | 0.433743   | 123 |
| V\$YY1_Q2         | YY1       | YY1    | 0.158969   | 123 |
| V\$DAX1_Q1        | Dax1      | NR0B1  | 0.569677   | 118 |
| V\$MYOGENIN_Q6_Q1 | myogenin  | MYOG   | 0.182505   | 112 |
| V\$ERM_Q2         | Erm       | ETV5   | 0.353231   | 97  |
| V\$ELK1_Q1        | Elk-1     | ELK1   | 0.259013   | 94  |
| V\$SPIB_Q3        | Spi-B     | SPIB   | 0.0443451  | 85  |
| V\$MATH1_Q2       | MATH1     | ATOH1  | 0.169532   | 78  |
| V\$EGR2_Q1        | Egr-2     | EGR2   | 0.284316   | 53  |
| V\$GLI3_Q5_Q1     | GLI3      | GLI3   | 0.00951285 | 31  |
| V\$SREBP1_Q2      | SREBP-1   | SREBF1 | 0.149918   | 28  |

hsa-mir-514a-1

| Matrix_id    | transcription factor | Gene  | PCC       | Occurrence |
|--------------|----------------------|-------|-----------|------------|
| V\$AP2REP_Q1 | AP-2rep              | KLF12 | 0.10671   | 338        |
| V\$GKLF_Q4   | GKLF                 | KLF4  | 0.126129  | 338        |
| V\$PARP_Q4   | PARP                 | PARP1 | 0.198157  | 334        |
| V\$PEA3_Q6   | PEA3                 | ETV4  | 0.110615  | 334        |
| V\$P300_Q1   | p300                 | EP300 | 0.0582464 | 325        |

|                   |            |         |            |     |
|-------------------|------------|---------|------------|-----|
| V\$TBP_Q6         | TBP        | TBP     | 0.813787   | 298 |
| V\$SOX9_Q4        | SOX9       | SOX9    | 0.643841   | 296 |
| V\$ETS1_B         | c-Ets-1    | ETS1    | 0.155006   | 283 |
| V\$NFAT4_Q3       | NF-AT4     | NFATC3  | 0.0735074  | 283 |
| V\$YY1_Q1         | YY1        | YY1     | 0.154308   | 281 |
| V\$HNF4A_Q6_Q1    | HNF-4alpha | HNF4A   | 0.0307412  | 271 |
| V\$DLX5_Q1        | dlx5       | DLX5    | 0.305071   | 264 |
| V\$SOX5_Q1        | SOX5       | SOX5    | 0.635963   | 260 |
| V\$SOX9_B1        | SOX9       | SOX9    | 0.643841   | 259 |
| V\$YY1_Q6         | YY1        | YY1     | 0.154308   | 255 |
| V\$YY1_Q6_Q2      | YY1        | YY1     | 0.154308   | 243 |
| V\$GATA1_Q2       | GATA-1     | GATA1   | 0.145362   | 232 |
| V\$GATA1_Q5       | GATA-1     | GATA1   | 0.145362   | 232 |
| V\$GATA1_Q6       | GATA-1     | GATA1   | 0.145362   | 232 |
| V\$SRY_Q2         | SRY        | SRY     | 0.10894    | 230 |
| V\$ERBETA_Q5      | ER-beta    | ESR2    | 0.260269   | 217 |
| V\$E2A_Q6         | E2A        | TCF3    | 0.425768   | 216 |
| V\$E12_Q6         | E12        | TCF3    | 0.425768   | 216 |
| V\$E47_Q2         | E47        | TCF3    | 0.425768   | 215 |
| V\$HMGIIY_Q1      | HMGIIY     | HMGA1   | 0.62437    | 208 |
| V\$ING4_Q1        | ING4       | ING4    | 0.0904487  | 207 |
| V\$HNF3B_Q6       | HNF-3beta  | FOXA2   | 0.0610178  | 196 |
| V\$PARP_Q3        | PARP       | PARP1   | 0.198157   | 194 |
| V\$GATA1_Q4       | GATA-1     | GATA1   | 0.145362   | 188 |
| V\$NFAT2_Q5       | NF-AT2     | NFATC1  | 0.150335   | 184 |
| V\$YY1_Q6_Q3      | YY1        | YY1     | 0.154308   | 177 |
| V\$FOXJ2_Q1       | FOXJ2      | FOXJ2   | 0.282763   | 171 |
| V\$MYOGENIN_Q6    | myogenin   | MYOG    | 0.186003   | 171 |
| V\$FOXM1_Q1       | FOXM1      | FOXM1   | 0.810248   | 165 |
| V\$TEF1_Q6_Q3     | TEF-1      | TEAD1   | 0.0234842  | 163 |
| V\$E2A_Q2         | E2A        | TCF3    | 0.425768   | 162 |
| V\$GFI1B_Q1       | Gfi1b      | GFI1B   | 0.00827918 | 162 |
| V\$IRF8_Q6        | IRF-8      | IRF8    | 0.0664966  | 154 |
| V\$TCF4_Q1        | TCF-4      | TCF7L2  | 0.0501635  | 151 |
| V\$FOXP3_Q1       | FOXP3      | FOXP3   | 0.0230266  | 150 |
| V\$TEF1_Q6        | TEF-1      | TEAD1   | 0.0234842  | 149 |
| V\$WT1_Q6         | WT1        | WT1     | 0.20827    | 132 |
| V\$MAZ_Q6_Q1      | MAZ        | MAZ     | 0.380903   | 127 |
| V\$DAX1_Q1        | Dax1       | NR0B1   | 0.582789   | 118 |
| V\$CDX1_Q1        | Cdx-1      | CDX1    | 0.105528   | 117 |
| V\$ZABC1_Q1       | ZABC1      | ZNF217  | 0.117898   | 114 |
| V\$MYOGENIN_Q6_Q1 | myogenin   | MYOG    | 0.186003   | 112 |
| V\$CEBPG_Q6_Q1    | C/EBPgamma | CEBPG   | 0.482196   | 99  |
| V\$CIZ_Q1         | CIZ        | ZNF384  | 0.145557   | 89  |
| V\$HNF6_Q6        | HNF6       | ONECUT1 | 0.0228486  | 87  |
| V\$TR4_Q2         | TR4        | NR2C2   | 0.117873   | 86  |



|             |            |              |           |    |
|-------------|------------|--------------|-----------|----|
| V\$YY1_03   | YY1        | YY1          | 0.154308  | 77 |
| V\$HOXB8_01 | HOXB8      | HOXB8        | 0.31066   | 68 |
| V\$STAT4_Q5 | STAT4      | STAT4        | 0.236328  | 67 |
| V\$CEBPG_Q6 | C/EBPgamma | CEBPG        | 0.482196  | 57 |
| V\$HNF1B_01 | HNF-1beta  | HNF1B        | 0.0258563 | 48 |
| V\$OCT2_01  |            | 2-Oct POU2F2 | 0.0423763 | 36 |
| V\$RREB1_01 | RREB-1     | RREB1        | 0.141112  | 35 |
| V\$NKX3A_02 | Nkx3A      | NKX3-1       | 0.10426   | 30 |
| V\$RORA1_01 | RORalpha1  | RORA         | 0.345375  | 27 |
| V\$DMRT1_01 | DMRT1      | DMRT1        | 0.965998  | 9  |

hsa-mir-514a-2

| Matrix_id      | transcription factor | Gene   | PCC       | Occurrence |
|----------------|----------------------|--------|-----------|------------|
| V\$AP2REP_01   | AP-2rep              | KLF12  | 0.10671   | 338        |
| V\$GKLF_Q4     | GKLF                 | KLF4   | 0.126129  | 338        |
| V\$PARP_Q4     | PARP                 | PARP1  | 0.198157  | 334        |
| V\$PEA3_Q6     | PEA3                 | ETV4   | 0.110615  | 334        |
| V\$P300_01     | p300                 | EP300  | 0.0582464 | 325        |
| V\$TBP_Q6      | TBP                  | TBP    | 0.813787  | 298        |
| V\$SOX9_Q4     | SOX9                 | SOX9   | 0.643841  | 296        |
| V\$ETS1_B      | c-Ets-1              | ETS1   | 0.155006  | 283        |
| V\$NFAT4_Q3    | NF-AT4               | NFATC3 | 0.0735074 | 283        |
| V\$YY1_01      | YY1                  | YY1    | 0.154308  | 281        |
| V\$HNF4A_Q6_01 | HNF-4alpha           | HNF4A  | 0.0307412 | 271        |
| V\$DLX5_01     | dlx5                 | DLX5   | 0.305071  | 264        |
| V\$SOX5_01     | SOX5                 | SOX5   | 0.635963  | 260        |
| V\$SOX9_B1     | SOX9                 | SOX9   | 0.643841  | 259        |
| V\$YY1_Q6      | YY1                  | YY1    | 0.154308  | 255        |
| V\$YY1_Q6_02   | YY1                  | YY1    | 0.154308  | 243        |
| V\$GATA1_02    | GATA-1               | GATA1  | 0.145362  | 232        |
| V\$GATA1_05    | GATA-1               | GATA1  | 0.145362  | 232        |
| V\$GATA1_06    | GATA-1               | GATA1  | 0.145362  | 232        |
| V\$SRY_02      | SRY                  | SRY    | 0.10894   | 230        |
| V\$ERBETA_Q5   | ER-beta              | ESR2   | 0.260269  | 217        |
| V\$E2A_Q6      | E2A                  | TCF3   | 0.425768  | 216        |
| V\$E12_Q6      | E12                  | TCF3   | 0.425768  | 216        |
| V\$E47_02      | E47                  | TCF3   | 0.425768  | 215        |
| V\$HMGIIY_01   | HMGIIY               | HMGA1  | 0.62437   | 208        |
| V\$ING4_01     | ING4                 | ING4   | 0.0904487 | 207        |
| V\$HNF3B_Q6    | HNF-3beta            | FOXA2  | 0.0610178 | 196        |
| V\$PARP_Q3     | PARP                 | PARP1  | 0.198157  | 194        |
| V\$GATA1_04    | GATA-1               | GATA1  | 0.145362  | 188        |

|                   |            |              |            |     |
|-------------------|------------|--------------|------------|-----|
| V\$NFAT2_Q5       | NF-AT2     | NFATC1       | 0.150335   | 184 |
| V\$YY1_Q6_03      | YY1        | YY1          | 0.154308   | 177 |
| V\$FOXJ2_01       | FOXJ2      | FOXJ2        | 0.282763   | 171 |
| V\$MYOGENIN_Q6    | myogenin   | MYOG         | 0.186003   | 171 |
| V\$FOXM1_01       | FOXM1      | FOXM1        | 0.810248   | 165 |
| V\$TEF1_Q6_03     | TEF-1      | TEAD1        | 0.0234842  | 163 |
| V\$E2A_Q2         | E2A        | TCF3         | 0.425768   | 162 |
| V\$GFI1B_01       | Gfi1b      | GFI1B        | 0.00827918 | 162 |
| V\$IRF8_Q6        | IRF-8      | IRF8         | 0.0664966  | 154 |
| V\$TCF4_01        | TCF-4      | TCF7L2       | 0.0501635  | 151 |
| V\$FOXP3_01       | FOXP3      | FOXP3        | 0.0230266  | 150 |
| V\$TEF1_Q6        | TEF-1      | TEAD1        | 0.0234842  | 149 |
| V\$WT1_Q6         | WT1        | WT1          | 0.20827    | 132 |
| V\$MAZ_Q6_01      | MAZ        | MAZ          | 0.380903   | 127 |
| V\$DAX1_01        | Dax1       | NR0B1        | 0.582789   | 118 |
| V\$CDX1_01        | Cdx-1      | CDX1         | 0.105528   | 117 |
| V\$ZABC1_01       | ZABC1      | ZNF217       | 0.117898   | 114 |
| V\$MYOGENIN_Q6_01 | myogenin   | MYOG         | 0.186003   | 112 |
| V\$CEBPG_Q6_01    | C/EBPgamma | CEBPG        | 0.482196   | 99  |
| V\$CIZ_01         | CIZ        | ZNF384       | 0.145557   | 89  |
| V\$HNF6_Q6        | HNF6       | ONECUT1      | 0.0228486  | 87  |
| V\$TR4_Q2         | TR4        | NR2C2        | 0.117873   | 86  |
| V\$YY1_03         | YY1        | YY1          | 0.154308   | 77  |
| V\$HOXB8_01       | HOXB8      | HOXB8        | 0.31066    | 68  |
| V\$STAT4_Q5       | STAT4      | STAT4        | 0.236328   | 67  |
| V\$CEBPG_Q6       | C/EBPgamma | CEBPG        | 0.482196   | 57  |
| V\$HNF1B_01       | HNF-1beta  | HNF1B        | 0.0258563  | 48  |
| V\$OCT2_01        |            | 2-Oct POU2F2 | 0.0423763  | 36  |
| V\$RREB1_01       | RREB-1     | RREB1        | 0.141112   | 35  |
| V\$NKX3A_02       | Nkx3A      | NKX3-1       | 0.10426    | 30  |
| V\$RORA1_01       | RORalpha1  | RORA         | 0.345375   | 27  |
| V\$DMRT1_01       | DMRT1      | DMRT1        | 0.965998   | 9   |

hsa-mir-514a-3

| Matrix_id    | transcription factor | Gene  | PCC       | Occurrence |
|--------------|----------------------|-------|-----------|------------|
| V\$AP2REP_01 | AP-2rep              | KLF12 | 0.10671   | 338        |
| V\$GKLF_Q4   | GKLF                 | KLF4  | 0.126129  | 338        |
| V\$PARP_Q4   | PARP                 | PARP1 | 0.198157  | 334        |
| V\$PEA3_Q6   | PEA3                 | ETV4  | 0.110615  | 334        |
| V\$P300_01   | p300                 | EP300 | 0.0582464 | 325        |
| V\$TBP_Q6    | TBP                  | TBP   | 0.813787  | 298        |
| V\$SOX9_Q4   | SOX9                 | SOX9  | 0.643841  | 296        |

|                   |            |         |            |     |
|-------------------|------------|---------|------------|-----|
| V\$ETS1_B         | c-Ets-1    | ETS1    | 0.155006   | 283 |
| V\$NFAT4_Q3       | NF-AT4     | NFATC3  | 0.0735074  | 283 |
| V\$YY1_01         | YY1        | YY1     | 0.154308   | 281 |
| V\$HNF4A_Q6_01    | HNF-4alpha | HNF4A   | 0.0307412  | 271 |
| V\$DLX5_01        | dlx5       | DLX5    | 0.305071   | 264 |
| V\$SOX5_01        | SOX5       | SOX5    | 0.635963   | 260 |
| V\$SOX9_B1        | SOX9       | SOX9    | 0.643841   | 259 |
| V\$YY1_Q6         | YY1        | YY1     | 0.154308   | 255 |
| V\$YY1_Q6_02      | YY1        | YY1     | 0.154308   | 243 |
| V\$GATA1_02       | GATA-1     | GATA1   | 0.145362   | 232 |
| V\$GATA1_05       | GATA-1     | GATA1   | 0.145362   | 232 |
| V\$GATA1_06       | GATA-1     | GATA1   | 0.145362   | 232 |
| V\$SRY_02         | SRY        | SRY     | 0.10894    | 230 |
| V\$ERBETA_Q5      | ER-beta    | ESR2    | 0.260269   | 217 |
| V\$E2A_Q6         | E2A        | TCF3    | 0.425768   | 216 |
| V\$E12_Q6         | E12        | TCF3    | 0.425768   | 216 |
| V\$E47_02         | E47        | TCF3    | 0.425768   | 215 |
| V\$HMGIIY_01      | HMGIIY     | HMGA1   | 0.62437    | 208 |
| V\$ING4_01        | ING4       | ING4    | 0.0904487  | 207 |
| V\$HNF3B_Q6       | HNF-3beta  | FOXA2   | 0.0610178  | 196 |
| V\$PARP_Q3        | PARP       | PARP1   | 0.198157   | 194 |
| V\$GATA1_04       | GATA-1     | GATA1   | 0.145362   | 188 |
| V\$NFAT2_Q5       | NF-AT2     | NFATC1  | 0.150335   | 184 |
| V\$YY1_Q6_03      | YY1        | YY1     | 0.154308   | 177 |
| V\$FOXJ2_01       | FOXJ2      | FOXJ2   | 0.282763   | 171 |
| V\$MYOGENIN_Q6    | myogenin   | MYOG    | 0.186003   | 171 |
| V\$FOXM1_01       | FOXM1      | FOXM1   | 0.810248   | 165 |
| V\$TEF1_Q6_03     | TEF-1      | TEAD1   | 0.0234842  | 163 |
| V\$E2A_Q2         | E2A        | TCF3    | 0.425768   | 162 |
| V\$GFI1B_01       | Gfi1b      | GFI1B   | 0.00827918 | 162 |
| V\$IRF8_Q6        | IRF-8      | IRF8    | 0.0664966  | 154 |
| V\$TCF4_01        | TCF-4      | TCF7L2  | 0.0501635  | 151 |
| V\$FOXP3_01       | FOXP3      | FOXP3   | 0.0230266  | 150 |
| V\$TEF1_Q6        | TEF-1      | TEAD1   | 0.0234842  | 149 |
| V\$WT1_Q6         | WT1        | WT1     | 0.20827    | 132 |
| V\$MAZ_Q6_01      | MAZ        | MAZ     | 0.380903   | 127 |
| V\$DAX1_01        | Dax1       | NR0B1   | 0.582789   | 118 |
| V\$CDX1_01        | Cdx-1      | CDX1    | 0.105528   | 117 |
| V\$ZABC1_01       | ZABC1      | ZNF217  | 0.117898   | 114 |
| V\$MYOGENIN_Q6_01 | myogenin   | MYOG    | 0.186003   | 112 |
| V\$CEBPG_Q6_01    | C/EBPgamma | CEBPG   | 0.482196   | 99  |
| V\$CI2_01         | CI2        | ZNF384  | 0.145557   | 89  |
| V\$HNF6_Q6        | HNF6       | ONECUT1 | 0.0228486  | 87  |
| V\$TR4_Q2         | TR4        | NR2C2   | 0.117873   | 86  |
| V\$YY1_03         | YY1        | YY1     | 0.154308   | 77  |
| V\$HOXB8_01       | HOXB8      | HOXB8   | 0.31066    | 68  |

|             |            |              |           |    |
|-------------|------------|--------------|-----------|----|
| V\$STAT4_Q5 | STAT4      | STAT4        | 0.236328  | 67 |
| V\$CEBPG_Q6 | C/EBPgamma | CEBPG        | 0.482196  | 57 |
| V\$HNF1B_01 | HNF-1beta  | HNF1B        | 0.0258563 | 48 |
| V\$OCT2_01  |            | 2-Oct POU2F2 | 0.0423763 | 36 |
| V\$RREB1_01 | RREB-1     | RREB1        | 0.141112  | 35 |
| V\$NKX3A_Q2 | Nkx3A      | NKX3-1       | 0.10426   | 30 |
| V\$RORA1_01 | RORalpha1  | RORA         | 0.345375  | 27 |
| V\$DMRT1_01 | DMRT1      | DMRT1        | 0.965998  | 9  |

hsa-mir-515-1

| Matrix_id      | transcription factor | Gene   | PCC        | Occurrence |
|----------------|----------------------|--------|------------|------------|
| V\$PUR1_Q4     | PUR1                 | PURA   | 0.158324   | 261        |
| V\$PARP_Q4     | PARP                 | PARP1  | 0.0983878  | 252        |
| V\$GKLF_Q4     | GKLF                 | KLF4   | 0.566234   | 243        |
| V\$MAFB_Q1     | MAFB                 | MAFB   | 0.297314   | 240        |
| V\$P300_Q1     | p300                 | EP300  | 0.348388   | 234        |
| V\$SMAD4_Q6_Q1 | Smad4                | SMAD4  | 0.306618   | 222        |
| V\$TBX5_Q2     | TBX5                 | TBX5   | 0.0775044  | 199        |
| V\$GR_Q6       | GR                   | NR3C1  | 0.154802   | 199        |
| V\$YY1_Q1      | YY1                  | YY1    | 0.365858   | 195        |
| V\$AML1_Q6     | AML1                 | RUNX1  | 0.00068527 | 186        |
| V\$DLX5_Q1     | dlx5                 | DLX5   | 0.692598   | 178        |
| V\$YY1_Q6_Q2   | YY1                  | YY1    | 0.365858   | 176        |
| V\$YY1_Q6      | YY1                  | YY1    | 0.365858   | 175        |
| V\$GATA1_Q2    | GATA-1               | GATA1  | 0.0155287  | 172        |
| V\$GATA1_Q5    | GATA-1               | GATA1  | 0.0155287  | 165        |
| V\$GATA2_Q2    | GATA-2               | GATA2  | 0.693704   | 165        |
| V\$GATA1_Q6    | GATA-1               | GATA1  | 0.0155287  | 165        |
| V\$TBX5_Q1     | TBX5                 | TBX5   | 0.0775044  | 158        |
| V\$PARP_Q3     | PARP                 | PARP1  | 0.0983878  | 157        |
| V\$ING4_Q1     | ING4                 | ING4   | 0.113723   | 157        |
| V\$SP1_Q6      | Sp1                  | SP1    | 0.347534   | 155        |
| V\$GATA1_Q4    | GATA-1               | GATA1  | 0.0155287  | 147        |
| V\$HMGY1_Q1    | HMGY1                | HMGA1  | 0.344195   | 145        |
| V\$GATA3_Q2    | GATA-3               | GATA3  | 0.911195   | 141        |
| V\$ARNT_Q1     | Arnt                 | ARNT   | 0.331656   | 132        |
| V\$CEBPE_Q6    | CEBPE                | CEBPE  | 0.0269462  | 120        |
| V\$GR_Q1       | GR                   | NR3C1  | 0.154802   | 117        |
| V\$TCF4_Q1     | TCF-4                | TCF7L2 | 0.46567    | 116        |
| V\$PITX2_Q2    | Pitx2                | PITX2  | 0.429703   | 109        |
| V\$TCF4_Q5     | TCF-4                | TCF7L2 | 0.46567    | 108        |
| V\$IRF7_Q3     | IRF-7                | IRF7   | 0.128957   | 106        |

|               |            |       |            |     |
|---------------|------------|-------|------------|-----|
| V\$FOXJ2_01   | FOXJ2      | FOXJ2 | 0.0455424  | 104 |
| V\$AML1_01    | AML1a      | RUNX1 | 0.00068527 | 104 |
| V\$CP2_01     | CP2        | TFCP2 | 0.574999   | 103 |
| V\$PITX2_01   | PITX2      | PITX2 | 0.429703   | 103 |
| V\$CEBPD_Q6   | C/EBPdelta | CEBPD | 0.43544    | 97  |
| V\$GATA3_03   | GATA-3     | GATA3 | 0.911195   | 91  |
| V\$AML1_Q4    | AML1       | RUNX1 | 0.00068527 | 90  |
| V\$STAT3_03   | STAT3      | STAT3 | 0.144926   | 77  |
| V\$CEBPB_Q6   | C/EBPbeta  | CEBPB | 0.595412   | 76  |
| V\$FOXO4_02   | FOXO4      | FOXO4 | 0.956862   | 74  |
| V\$CEBPA_01   | C/EBPalpha | CEBPA | 0.0703573  | 71  |
| V\$P53_02     | p53        | TP53  | 0.605339   | 66  |
| V\$IRF1_Q6_01 | IRF-1      | IRF1  | 0.337992   | 48  |
| V\$CDP_04     | CDP        | CUX1  | 0.361474   | 38  |
| V\$GRE_C      | GR         | NR3C1 | 0.154802   | 16  |

hsa-mir-515-2

| Matrix_id      | transcription factor | Gene  | PCC        | Occurrence |
|----------------|----------------------|-------|------------|------------|
| V\$PUR1_Q4     | PUR1                 | PURA  | 0.158324   | 261        |
| V\$PARP_Q4     | PARP                 | PARP1 | 0.0983878  | 252        |
| V\$GKLF_Q4     | GKLF                 | KLF4  | 0.566234   | 243        |
| V\$MAFB_01     | MAFB                 | MAFB  | 0.297314   | 240        |
| V\$P300_01     | p300                 | EP300 | 0.348388   | 234        |
| V\$SMAD4_Q6_01 | Smad4                | SMAD4 | 0.306618   | 222        |
| V\$TBX5_02     | TBX5                 | TBX5  | 0.0775044  | 199        |
| V\$GR_Q6       | GR                   | NR3C1 | 0.154802   | 199        |
| V\$YY1_01      | YY1                  | YY1   | 0.365858   | 195        |
| V\$AML1_Q6     | AML1                 | RUNX1 | 0.00068527 | 186        |
| V\$DLX5_01     | dlx5                 | DLX5  | 0.692598   | 178        |
| V\$YY1_Q6_02   | YY1                  | YY1   | 0.365858   | 176        |
| V\$YY1_Q6      | YY1                  | YY1   | 0.365858   | 175        |
| V\$GATA1_02    | GATA-1               | GATA1 | 0.0155287  | 172        |
| V\$GATA1_05    | GATA-1               | GATA1 | 0.0155287  | 165        |
| V\$GATA2_02    | GATA-2               | GATA2 | 0.693704   | 165        |
| V\$GATA1_06    | GATA-1               | GATA1 | 0.0155287  | 165        |
| V\$TBX5_01     | TBX5                 | TBX5  | 0.0775044  | 158        |
| V\$PARP_Q3     | PARP                 | PARP1 | 0.0983878  | 157        |
| V\$ING4_01     | ING4                 | ING4  | 0.113723   | 157        |
| V\$SP1_Q6      | Sp1                  | SP1   | 0.347534   | 155        |
| V\$GATA1_04    | GATA-1               | GATA1 | 0.0155287  | 147        |
| V\$HMG1Y_01    | HMG1Y                | HMGA1 | 0.344195   | 145        |
| V\$GATA3_02    | GATA-3               | GATA3 | 0.911195   | 141        |

|               |            |        |            |     |
|---------------|------------|--------|------------|-----|
| V\$ARNT_01    | Arnt       | ARNT   | 0.331656   | 132 |
| V\$CEBPE_Q6   | CEBPE      | CEBPE  | 0.0269462  | 120 |
| V\$GR_01      | GR         | NR3C1  | 0.154802   | 117 |
| V\$TCF4_01    | TCF-4      | TCF7L2 | 0.46567    | 116 |
| V\$PITX2_Q2   | Pitx2      | PITX2  | 0.429703   | 109 |
| V\$TCF4_Q5    | TCF-4      | TCF7L2 | 0.46567    | 108 |
| V\$IRF7_Q3    | IRF-7      | IRF7   | 0.128957   | 106 |
| V\$FOXJ2_01   | FOXJ2      | FOXJ2  | 0.0455424  | 104 |
| V\$AML1_01    | AML1a      | RUNX1  | 0.00068527 | 104 |
| V\$CP2_01     | CP2        | TFCP2  | 0.574999   | 103 |
| V\$PITX2_01   | PITX2      | PITX2  | 0.429703   | 103 |
| V\$CEBPD_Q6   | C/EBPdelta | CEBPD  | 0.43544    | 97  |
| V\$GATA3_Q3   | GATA-3     | GATA3  | 0.911195   | 91  |
| V\$AML1_Q4    | AML1       | RUNX1  | 0.00068527 | 90  |
| V\$STAT3_Q3   | STAT3      | STAT3  | 0.144926   | 77  |
| V\$CEBPB_Q6   | C/EBPbeta  | CEBPB  | 0.595412   | 76  |
| V\$FOXO4_Q2   | FOXO4      | FOXO4  | 0.956862   | 74  |
| V\$CEBPA_Q1   | C/EBPalpha | CEBPA  | 0.0703573  | 71  |
| V\$P53_Q2     | p53        | TP53   | 0.605339   | 66  |
| V\$IRF1_Q6_Q1 | IRF-1      | IRF1   | 0.337992   | 48  |
| V\$CDP_Q4     | CDP        | CUX1   | 0.361474   | 38  |
| V\$GRE_C      | GR         | NR3C1  | 0.154802   | 16  |

hsa-mir-517a

| Matrix_id      | transcription factor | Gene  | PCC        | Occurrence |
|----------------|----------------------|-------|------------|------------|
| V\$PUR1_Q4     | PUR1                 | PURA  | 0.159597   | 262        |
| V\$PARP_Q4     | PARP                 | PARP1 | 0.0985748  | 253        |
| V\$GKLF_Q4     | GKLF                 | KLF4  | 0.566562   | 244        |
| V\$MAFB_Q1     | MAFB                 | MAFB  | 0.299378   | 241        |
| V\$P300_Q1     | p300                 | EP300 | 0.348845   | 235        |
| V\$SMAD4_Q6_Q1 | Smad4                | SMAD4 | 0.307764   | 223        |
| V\$TBX5_Q2     | TBX5                 | TBX5  | 0.0781343  | 200        |
| V\$GR_Q6       | GR                   | NR3C1 | 0.156632   | 200        |
| V\$YY1_Q1      | YY1                  | YY1   | 0.366383   | 196        |
| V\$AML1_Q6     | AML1                 | RUNX1 | 0.00089125 | 187        |
| V\$DLX5_Q1     | dlx5                 | DLX5  | 0.691452   | 178        |
| V\$YY1_Q6_Q2   | YY1                  | YY1   | 0.366383   | 177        |
| V\$YY1_Q6      | YY1                  | YY1   | 0.366383   | 176        |
| V\$GATA1_Q2    | GATA-1               | GATA1 | 0.0160112  | 172        |
| V\$GATA1_Q5    | GATA-1               | GATA1 | 0.0160112  | 165        |
| V\$GATA2_Q2    | GATA-2               | GATA2 | 0.69469    | 165        |
| V\$GATA1_Q6    | GATA-1               | GATA1 | 0.0160112  | 165        |

|               |            |        |            |     |
|---------------|------------|--------|------------|-----|
| V\$TBX5_01    | TBX5       | TBX5   | 0.0781343  | 159 |
| V\$PARP_Q3    | PARP       | PARP1  | 0.0985748  | 158 |
| V\$ING4_01    | ING4       | ING4   | 0.115007   | 158 |
| V\$SP1_Q6     | Sp1        | SP1    | 0.347907   | 156 |
| V\$GATA1_04   | GATA-1     | GATA1  | 0.0160112  | 147 |
| V\$HMG1Y_01   | HMG1Y      | HMGA1  | 0.341793   | 145 |
| V\$GATA3_02   | GATA-3     | GATA3  | 0.911784   | 141 |
| V\$ARNT_01    | Arnt       | ARNT   | 0.332974   | 132 |
| V\$CEBPE_Q6   | CEBPE      | CEBPE  | 0.027951   | 121 |
| V\$GR_01      | GR         | NR3C1  | 0.156632   | 117 |
| V\$TCF4_01    | TCF-4      | TCF7L2 | 0.466466   | 116 |
| V\$PITX2_Q2   | Pitx2      | PITX2  | 0.430065   | 110 |
| V\$TCF4_Q5    | TCF-4      | TCF7L2 | 0.466466   | 109 |
| V\$IRF7_Q3    | IRF-7      | IRF7   | 0.130482   | 106 |
| V\$AML1_01    | AML1a      | RUNX1  | 0.00089125 | 105 |
| V\$FOXJ2_01   | FOXJ2      | FOXJ2  | 0.0453317  | 104 |
| V\$PITX2_01   | PITX2      | PITX2  | 0.430065   | 104 |
| V\$CP2_01     | CP2        | TFCP2  | 0.575514   | 103 |
| V\$CEBPD_Q6   | C/EBPdelta | CEBPD  | 0.437343   | 98  |
| V\$GATA3_03   | GATA-3     | GATA3  | 0.911784   | 91  |
| V\$AML1_Q4    | AML1       | RUNX1  | 0.00089125 | 91  |
| V\$STAT3_03   | STAT3      | STAT3  | 0.146038   | 77  |
| V\$CEBPB_Q6   | C/EBPbeta  | CEBPB  | 0.596652   | 77  |
| V\$FOXO4_02   | FOXO4      | FOXO4  | 0.956358   | 74  |
| V\$CEBPA_01   | C/EBPalpha | CEBPA  | 0.0710433  | 72  |
| V\$P53_Q2     | p53        | TP53   | 0.605304   | 66  |
| V\$IRF1_Q6_01 | IRF-1      | IRF1   | 0.338196   | 48  |
| V\$CDP_Q4     | CDP        | CUX1   | 0.363033   | 38  |
| V\$GRE_C      | GR         | NR3C1  | 0.156632   | 16  |

hsa-mir-518b

| Matrix_id      | transcription factor | Gene  | PCC       | Occurrence |
|----------------|----------------------|-------|-----------|------------|
| V\$PUR1_Q4     | PUR1                 | PURA  | 0.158994  | 261        |
| V\$PARP_Q4     | PARP                 | PARP1 | 0.0960098 | 252        |
| V\$GKLF_Q4     | GKLF                 | KLF4  | 0.567167  | 244        |
| V\$MAFB_01     | MAFB                 | MAFB  | 0.299154  | 240        |
| V\$P300_01     | p300                 | EP300 | 0.348224  | 234        |
| V\$SMAD4_Q6_01 | Smad4                | SMAD4 | 0.306605  | 222        |
| V\$GR_Q6       | GR                   | NR3C1 | 0.15543   | 199        |
| V\$TBX5_02     | TBX5                 | TBX5  | 0.0759386 | 199        |
| V\$YY1_01      | YY1                  | YY1   | 0.366001  | 195        |
| V\$DLX5_01     | dlx5                 | DLX5  | 0.690771  | 177        |

|               |            |        |           |     |
|---------------|------------|--------|-----------|-----|
| V\$YY1_Q6_02  | YY1        | YY1    | 0.366001  | 176 |
| V\$YY1_Q6     | YY1        | YY1    | 0.366001  | 176 |
| V\$GATA1_02   | GATA-1     | GATA1  | 0.0137705 | 171 |
| V\$GATA1_06   | GATA-1     | GATA1  | 0.0137705 | 164 |
| V\$GATA1_05   | GATA-1     | GATA1  | 0.0137705 | 164 |
| V\$GATA2_02   | GATA-2     | GATA2  | 0.692805  | 164 |
| V\$ING4_01    | ING4       | ING4   | 0.109653  | 158 |
| V\$TBX5_01    | TBX5       | TBX5   | 0.0759386 | 158 |
| V\$PARP_Q3    | PARP       | PARP1  | 0.0960098 | 157 |
| V\$SP1_Q6     | Sp1        | SP1    | 0.346647  | 155 |
| V\$GATA1_04   | GATA-1     | GATA1  | 0.0137705 | 146 |
| V\$HMG1Y_01   | HMG1Y      | HMG1A1 | 0.342415  | 144 |
| V\$GATA3_02   | GATA-3     | GATA3  | 0.910615  | 140 |
| V\$ARNT_01    | Arnt       | ARNT   | 0.33102   | 132 |
| V\$CEBPE_Q6   | CEBPE      | CEBPE  | 0.0261909 | 120 |
| V\$GR_01      | GR         | NR3C1  | 0.15543   | 117 |
| V\$TCF4_01    | TCF-4      | TCF7L2 | 0.467338  | 116 |
| V\$PITX2_Q2   | Pitx2      | PITX2  | 0.429709  | 110 |
| V\$TCF4_Q5    | TCF-4      | TCF7L2 | 0.467338  | 109 |
| V\$IRF7_Q3    | IRF-7      | IRF7   | 0.128621  | 106 |
| V\$PITX2_01   | PITX2      | PITX2  | 0.429709  | 104 |
| V\$FOXJ2_01   | FOXJ2      | FOXJ2  | 0.0442497 | 104 |
| V\$CP2_01     | CP2        | TFCP2  | 0.575438  | 102 |
| V\$CEBPD_Q6   | C/EBPdelta | CEBPD  | 0.435813  | 98  |
| V\$GATA3_03   | GATA-3     | GATA3  | 0.910615  | 90  |
| V\$STAT3_03   | STAT3      | STAT3  | 0.144555  | 76  |
| V\$CEBPB_Q6   | C/EBPbeta  | CEBPB  | 0.595079  | 76  |
| V\$FOXO4_02   | FOXO4      | FOXO4  | 0.957536  | 73  |
| V\$CEBPA_01   | C/EBPalpha | CEBPA  | 0.0697542 | 72  |
| V\$P53_02     | p53        | TP53   | 0.602834  | 66  |
| V\$IRF1_Q6_01 | IRF-1      | IRF1   | 0.338483  | 48  |
| V\$CDP_04     | CDP        | CUX1   | 0.361576  | 38  |
| V\$GRE_C      | GR         | NR3C1  | 0.15543   | 16  |

hsa-mir-518c

| Matrix_id      | transcription factor | Gene  | PCC       | Occurrence |
|----------------|----------------------|-------|-----------|------------|
| V\$PUR1_Q4     | PUR1                 | PURA  | 0.158856  | 260        |
| V\$PARP_Q4     | PARP                 | PARP1 | 0.0970415 | 251        |
| V\$GKLF_Q4     | GKLF                 | KLF4  | 0.565031  | 243        |
| V\$MAFB_01     | MAFB                 | MAFB  | 0.297709  | 239        |
| V\$P300_01     | p300                 | EP300 | 0.347649  | 233        |
| V\$SMAD4_Q6_01 | Smad4                | SMAD4 | 0.305999  | 221        |



|               |            |        |           |     |
|---------------|------------|--------|-----------|-----|
| V\$GR_Q6      | GR         | NR3C1  | 0.155078  | 198 |
| V\$TBX5_02    | TBX5       | TBX5   | 0.0769572 | 198 |
| V\$YY1_01     | YY1        | YY1    | 0.364485  | 194 |
| V\$DLX5_01    | dlx5       | DLX5   | 0.691174  | 177 |
| V\$YY1_Q6_02  | YY1        | YY1    | 0.364485  | 175 |
| V\$YY1_Q6     | YY1        | YY1    | 0.364485  | 175 |
| V\$GATA1_02   | GATA-1     | GATA1  | 0.0142632 | 171 |
| V\$GATA1_06   | GATA-1     | GATA1  | 0.0142632 | 164 |
| V\$GATA1_05   | GATA-1     | GATA1  | 0.0142632 | 164 |
| V\$GATA2_02   | GATA-2     | GATA2  | 0.693465  | 164 |
| V\$ING4_01    | ING4       | ING4   | 0.112397  | 157 |
| V\$TBX5_01    | TBX5       | TBX5   | 0.0769572 | 157 |
| V\$PARP_Q3    | PARP       | PARP1  | 0.0970415 | 156 |
| V\$SP1_Q6     | Sp1        | SP1    | 0.347029  | 154 |
| V\$GATA1_04   | GATA-1     | GATA1  | 0.0142632 | 146 |
| V\$HMG1Y_01   | HMG1Y      | HMG1A1 | 0.341503  | 144 |
| V\$GATA3_02   | GATA-3     | GATA3  | 0.911105  | 140 |
| V\$ARNT_01    | Arnt       | ARNT   | 0.331714  | 132 |
| V\$CEBPE_Q6   | CEBPE      | CEBPE  | 0.0269708 | 119 |
| V\$GR_01      | GR         | NR3C1  | 0.155078  | 117 |
| V\$TCF4_01    | TCF-4      | TCF7L2 | 0.46472   | 116 |
| V\$PITX2_Q2   | Pitx2      | PITX2  | 0.430039  | 109 |
| V\$TCF4_Q5    | TCF-4      | TCF7L2 | 0.46472   | 108 |
| V\$IRF7_Q3    | IRF-7      | IRF7   | 0.129665  | 106 |
| V\$FOXJ2_01   | FOXJ2      | FOXJ2  | 0.0439877 | 104 |
| V\$PITX2_01   | PITX2      | PITX2  | 0.430039  | 103 |
| V\$CP2_01     | CP2        | TFCP2  | 0.575089  | 102 |
| V\$CEBPD_Q6   | C/EBPdelta | CEBPD  | 0.435786  | 97  |
| V\$GATA3_03   | GATA-3     | GATA3  | 0.911105  | 90  |
| V\$STAT3_03   | STAT3      | STAT3  | 0.145073  | 76  |
| V\$CEBPB_Q6   | C/EBPbeta  | CEBPB  | 0.595797  | 75  |
| V\$FOXO4_02   | FOXO4      | FOXO4  | 0.956836  | 73  |
| V\$CEBPA_01   | C/EBPalpha | CEBPA  | 0.0704781 | 71  |
| V\$P53_Q2     | p53        | TP53   | 0.604381  | 66  |
| V\$IRF1_Q6_01 | IRF-1      | IRF1   | 0.337851  | 48  |
| V\$CDP_Q4     | CDP        | CUX1   | 0.36152   | 38  |
| V\$GRE_C      | GR         | NR3C1  | 0.155078  | 16  |

hsa-mir-518f

| Matrix_id  | transcription factor | Gene  | PCC       | Occurrence |
|------------|----------------------|-------|-----------|------------|
| V\$PUR1_Q4 | PUR1                 | PURA  | 0.159235  | 261        |
| V\$PARP_Q4 | PARP                 | PARP1 | 0.0978238 | 252        |

|                |            |        |            |     |
|----------------|------------|--------|------------|-----|
| V\$GKLF_Q4     | GKLF       | KLF4   | 0.565814   | 244 |
| V\$MAFB_01     | MAFB       | MAFB   | 0.298562   | 240 |
| V\$P300_01     | p300       | EP300  | 0.34826    | 234 |
| V\$SMAD4_Q6_01 | Smad4      | SMAD4  | 0.3069     | 222 |
| V\$TBX5_02     | TBX5       | TBX5   | 0.0775578  | 199 |
| V\$GR_Q6       | GR         | NR3C1  | 0.155871   | 199 |
| V\$YY1_01      | YY1        | YY1    | 0.365454   | 195 |
| V\$AML1_Q6     | AML1       | RUNX1  | 0.00021059 | 186 |
| V\$DLX5_01     | dlx5       | DLX5   | 0.691319   | 177 |
| V\$YY1_Q6      | YY1        | YY1    | 0.365454   | 176 |
| V\$YY1_Q6_02   | YY1        | YY1    | 0.365454   | 176 |
| V\$GATA1_02    | GATA-1     | GATA1  | 0.0151546  | 171 |
| V\$GATA1_06    | GATA-1     | GATA1  | 0.0151546  | 164 |
| V\$GATA2_02    | GATA-2     | GATA2  | 0.694093   | 164 |
| V\$GATA1_05    | GATA-1     | GATA1  | 0.0151546  | 164 |
| V\$TBX5_01     | TBX5       | TBX5   | 0.0775578  | 158 |
| V\$ING4_01     | ING4       | ING4   | 0.113729   | 158 |
| V\$PARP_Q3     | PARP       | PARP1  | 0.0978238  | 157 |
| V\$SP1_Q6      | Sp1        | SP1    | 0.347479   | 155 |
| V\$GATA1_04    | GATA-1     | GATA1  | 0.0151546  | 146 |
| V\$HMG1Y_01    | HMG1Y      | HMGA1  | 0.341653   | 144 |
| V\$GATA3_02    | GATA-3     | GATA3  | 0.911455   | 140 |
| V\$ARNT_01     | Arnt       | ARNT   | 0.332358   | 132 |
| V\$CEBPE_Q6    | CEBPE      | CEBPE  | 0.0274708  | 120 |
| V\$GR_01       | GR         | NR3C1  | 0.155871   | 117 |
| V\$TCF4_01     | TCF-4      | TCF7L2 | 0.465613   | 116 |
| V\$PITX2_Q2    | Pitx2      | PITX2  | 0.430054   | 110 |
| V\$TCF4_Q5     | TCF-4      | TCF7L2 | 0.465613   | 109 |
| V\$IRF7_Q3     | IRF-7      | IRF7   | 0.130082   | 106 |
| V\$FOXJ2_01    | FOXJ2      | FOXJ2  | 0.0446732  | 104 |
| V\$PITX2_01    | PITX2      | PITX2  | 0.430054   | 104 |
| V\$AML1_01     | AML1a      | RUNX1  | 0.00021059 | 104 |
| V\$CP2_01      | CP2        | TFCP2  | 0.575309   | 102 |
| V\$CEBPD_Q6    | C/EBPdelta | CEBPD  | 0.436582   | 98  |
| V\$GATA3_03    | GATA-3     | GATA3  | 0.911455   | 90  |
| V\$AML1_Q4     | AML1       | RUNX1  | 0.00021059 | 90  |
| V\$STAT3_03    | STAT3      | STAT3  | 0.145566   | 76  |
| V\$CEBPB_Q6    | C/EBPbeta  | CEBPB  | 0.596236   | 76  |
| V\$FOXO4_02    | FOXO4      | FOXO4  | 0.956597   | 73  |
| V\$CEBPA_01    | C/EBPalpha | CEBPA  | 0.0707667  | 72  |
| V\$P53_Q2      | p53        | TP53   | 0.604854   | 66  |
| V\$IRF1_Q6_01  | IRF-1      | IRF1   | 0.338028   | 48  |
| V\$CDP_04      | CDP        | CUX1   | 0.362293   | 38  |
| V\$GRE_C       | GR         | NR3C1  | 0.155871   | 16  |

---

hsa-mir-519b

| Matrix_id      | transcription factor | Gene   | PCC        | Occurrence |
|----------------|----------------------|--------|------------|------------|
| V\$PUR1_Q4     | PUR1                 | PURA   | 0.16005    | 263        |
| V\$PARP_Q4     | PARP                 | PARP1  | 0.0995149  | 254        |
| V\$GKLF_Q4     | GKLF                 | KLF4   | 0.567492   | 246        |
| V\$MAFB_01     | MAFB                 | MAFB   | 0.300398   | 241        |
| V\$P300_01     | p300                 | EP300  | 0.349573   | 236        |
| V\$SMAD4_Q6_01 | Smad4                | SMAD4  | 0.308843   | 223        |
| V\$GR_Q6       | GR                   | NR3C1  | 0.157584   | 201        |
| V\$TBX5_02     | TBX5                 | TBX5   | 0.0788559  | 200        |
| V\$YY1_01      | YY1                  | YY1    | 0.367543   | 197        |
| V\$AML1_Q6     | AML1                 | RUNX1  | 0.00174447 | 188        |
| V\$DLX5_01     | dlx5                 | DLX5   | 0.691609   | 178        |
| V\$YY1_Q6      | YY1                  | YY1    | 0.367543   | 176        |
| V\$YY1_Q6_02   | YY1                  | YY1    | 0.367543   | 176        |
| V\$GATA1_02    | GATA-1               | GATA1  | 0.0170848  | 173        |
| V\$GATA1_06    | GATA-1               | GATA1  | 0.0170848  | 165        |
| V\$GATA2_02    | GATA-2               | GATA2  | 0.695429   | 165        |
| V\$GATA1_05    | GATA-1               | GATA1  | 0.0170848  | 165        |
| V\$ING4_01     | ING4                 | ING4   | 0.116608   | 160        |
| V\$PARP_Q3     | PARP                 | PARP1  | 0.0995149  | 159        |
| V\$TBX5_01     | TBX5                 | TBX5   | 0.0788559  | 159        |
| V\$SP1_Q6      | Sp1                  | SP1    | 0.34844    | 156        |
| V\$GATA1_04    | GATA-1               | GATA1  | 0.0170848  | 148        |
| V\$HMGY1_01    | HMGY1                | HMGA1  | 0.341965   | 145        |
| V\$GATA3_02    | GATA-3               | GATA3  | 0.912183   | 141        |
| V\$ARNT_01     | Arnt                 | ARNT   | 0.333742   | 134        |
| V\$CEBPE_Q6    | CEBPE                | CEBPE  | 0.0285527  | 121        |
| V\$GR_01       | GR                   | NR3C1  | 0.157584   | 119        |
| V\$TCF4_01     | TCF-4                | TCF7L2 | 0.46753    | 118        |
| V\$TCF4_Q5     | TCF-4                | TCF7L2 | 0.46753    | 111        |
| V\$PITX2_Q2    | Pitx2                | PITX2  | 0.430072   | 111        |
| V\$IRF7_Q3     | IRF-7                | IRF7   | 0.130981   | 107        |
| V\$FOXJ2_01    | FOXJ2                | FOXJ2  | 0.0461565  | 106        |
| V\$PITX2_01    | PITX2                | PITX2  | 0.430072   | 105        |
| V\$AML1_01     | AML1a                | RUNX1  | 0.00174447 | 105        |
| V\$CP2_01      | CP2                  | TFCP2  | 0.575764   | 103        |
| V\$CEBPD_Q6    | C/EBPdelta           | CEBPD  | 0.438292   | 98         |
| V\$GATA3_03    | GATA-3               | GATA3  | 0.912183   | 92         |
| V\$AML1_Q4     | AML1                 | RUNX1  | 0.00174447 | 90         |
| V\$STAT3_03    | STAT3                | STAT3  | 0.146628   | 76         |
| V\$CEBPB_Q6    | C/EBPbeta            | CEBPB  | 0.597165   | 76         |
| V\$FOXO4_02    | FOXO4                | FOXO4  | 0.956047   | 75         |

|               |           |       |           |    |
|---------------|-----------|-------|-----------|----|
| V\$CEBPA_01   | C/EBPalph | CEBPA | 0.0713893 | 72 |
| V\$P53_02     | p53       | TP53  | 0.605859  | 66 |
| V\$IRF1_Q6_01 | IRF-1     | IRF1  | 0.338402  | 49 |
| V\$CDP_04     | CDP       | CUX1  | 0.363955  | 38 |
| V\$GRE_C      | GR        | NR3C1 | 0.157584  | 16 |

hsa-mir-519c

| Matrix_id      | transcription factor | Gene   | PCC        | Occurrence |
|----------------|----------------------|--------|------------|------------|
| V\$PUR1_Q4     | PUR1                 | PURA   | 0.157957   | 261        |
| V\$PARP_Q4     | PARP                 | PARP1  | 0.0982677  | 252        |
| V\$GKLF_Q4     | GKLF                 | KLF4   | 0.566075   | 243        |
| V\$MAFB_01     | MAFB                 | MAFB   | 0.296697   | 240        |
| V\$P300_01     | p300                 | EP300  | 0.348212   | 234        |
| V\$SMAD4_Q6_01 | Smad4                | SMAD4  | 0.306236   | 222        |
| V\$TBX5_02     | TBX5                 | TBX5   | 0.0772853  | 199        |
| V\$GR_Q6       | GR                   | NR3C1  | 0.154252   | 199        |
| V\$YY1_01      | YY1                  | YY1    | 0.365631   | 195        |
| V\$AML1_Q6     | AML1                 | RUNX1  | 0.00056746 | 186        |
| V\$DLX5_01     | dlx5                 | DLX5   | 0.692881   | 178        |
| V\$YY1_Q6_02   | YY1                  | YY1    | 0.365631   | 176        |
| V\$YY1_Q6      | YY1                  | YY1    | 0.365631   | 175        |
| V\$GATA1_02    | GATA-1               | GATA1  | 0.0153221  | 172        |
| V\$GATA1_05    | GATA-1               | GATA1  | 0.0153221  | 165        |
| V\$GATA2_02    | GATA-2               | GATA2  | 0.693386   | 165        |
| V\$GATA1_06    | GATA-1               | GATA1  | 0.0153221  | 165        |
| V\$TBX5_01     | TBX5                 | TBX5   | 0.0772853  | 158        |
| V\$PARP_Q3     | PARP                 | PARP1  | 0.0982677  | 157        |
| V\$ING4_01     | ING4                 | ING4   | 0.113268   | 157        |
| V\$SP1_Q6      | Sp1                  | SP1    | 0.347394   | 155        |
| V\$GATA1_04    | GATA-1               | GATA1  | 0.0153221  | 147        |
| V\$HMG1Y_01    | HMG1Y                | HMGA1  | 0.344807   | 145        |
| V\$GATA3_02    | GATA-3               | GATA3  | 0.911005   | 141        |
| V\$ARNT_01     | Arnt                 | ARNT   | 0.331252   | 132        |
| V\$CEBPE_Q6    | CEBPE                | CEBPE  | 0.0266386  | 120        |
| V\$GR_01       | GR                   | NR3C1  | 0.154252   | 117        |
| V\$TCF4_01     | TCF-4                | TCF7L2 | 0.465379   | 116        |
| V\$PITX2_Q2    | Pitx2                | PITX2  | 0.429606   | 109        |
| V\$TCF4_Q5     | TCF-4                | TCF7L2 | 0.465379   | 108        |
| V\$IRF7_Q3     | IRF-7                | IRF7   | 0.128521   | 106        |
| V\$FOXJ2_01    | FOXJ2                | FOXJ2  | 0.0455351  | 104        |
| V\$AML1_01     | AML1a                | RUNX1  | 0.00056746 | 104        |
| V\$CP2_01      | CP2                  | TFCP2  | 0.574842   | 103        |

|               |            |       |            |     |
|---------------|------------|-------|------------|-----|
| V\$PITX2_01   | PITX2      | PITX2 | 0.429606   | 103 |
| V\$CEBPD_Q6   | C/EBPdelta | CEBPD | 0.434869   | 97  |
| V\$GATA3_03   | GATA-3     | GATA3 | 0.911005   | 91  |
| V\$AML1_Q4    | AML1       | RUNX1 | 0.00056746 | 90  |
| V\$STAT3_03   | STAT3      | STAT3 | 0.144591   | 77  |
| V\$CEBPB_Q6   | C/EBPbeta  | CEBPB | 0.595046   | 76  |
| V\$FOXO4_02   | FOXO4      | FOXO4 | 0.957011   | 74  |
| V\$CEBPA_01   | C/EBPalpha | CEBPA | 0.0701517  | 71  |
| V\$P53_02     | p53        | TP53  | 0.605303   | 66  |
| V\$IRF1_Q6_01 | IRF-1      | IRF1  | 0.337922   | 48  |
| V\$CDP_04     | CDP        | CUX1  | 0.360996   | 38  |
| V\$GRE_C      | GR         | NR3C1 | 0.154252   | 16  |

hsa-mir-519d

| Matrix_id      | transcription factor | Gene  | PCC        | Occurrence |
|----------------|----------------------|-------|------------|------------|
| V\$PUR1_Q4     | PUR1                 | PURA  | 0.158599   | 261        |
| V\$PARP_Q4     | PARP                 | PARP1 | 0.0980386  | 252        |
| V\$GKLF_Q4     | GKLF                 | KLF4  | 0.56594    | 243        |
| V\$MAFB_01     | MAFB                 | MAFB  | 0.297633   | 240        |
| V\$P300_01     | p300                 | EP300 | 0.348233   | 234        |
| V\$SMAD4_Q6_01 | Smad4                | SMAD4 | 0.306566   | 222        |
| V\$TBX5_02     | TBX5                 | TBX5  | 0.0774188  | 199        |
| V\$GR_Q6       | GR                   | NR3C1 | 0.155064   | 199        |
| V\$YY1_01      | YY1                  | YY1   | 0.365537   | 195        |
| V\$AML1_Q6     | AML1                 | RUNX1 | 0.00038244 | 186        |
| V\$DLX5_01     | dlx5                 | DLX5  | 0.692094   | 178        |
| V\$YY1_Q6_02   | YY1                  | YY1   | 0.365537   | 176        |
| V\$YY1_Q6      | YY1                  | YY1   | 0.365537   | 175        |
| V\$GATA1_02    | GATA-1               | GATA1 | 0.0152314  | 172        |
| V\$GATA1_05    | GATA-1               | GATA1 | 0.0152314  | 165        |
| V\$GATA2_02    | GATA-2               | GATA2 | 0.693741   | 165        |
| V\$GATA1_06    | GATA-1               | GATA1 | 0.0152314  | 165        |
| V\$TBX5_01     | TBX5                 | TBX5  | 0.0774188  | 158        |
| V\$PARP_Q3     | PARP                 | PARP1 | 0.0980386  | 157        |
| V\$ING4_01     | ING4                 | ING4  | 0.113491   | 157        |
| V\$SP1_Q6      | Sp1                  | SP1   | 0.347435   | 155        |
| V\$GATA1_04    | GATA-1               | GATA1 | 0.0152314  | 147        |
| V\$HMGY1_Q1    | HMGY1                | HMGY1 | 0.343216   | 145        |
| V\$GATA3_02    | GATA-3               | GATA3 | 0.911233   | 141        |
| V\$ARNT_01     | Arnt                 | ARNT  | 0.331807   | 132        |
| V\$CEBPE_Q6    | CEBPE                | CEBPE | 0.027055   | 120        |
| V\$GR_01       | GR                   | NR3C1 | 0.155064   | 117        |

|               |            |        |            |     |
|---------------|------------|--------|------------|-----|
| V\$TCF4_01    | TCF-4      | TCF7L2 | 0.465492   | 116 |
| V\$PITX2_Q2   | Pitx2      | PITX2  | 0.429833   | 109 |
| V\$TCF4_Q5    | TCF-4      | TCF7L2 | 0.465492   | 108 |
| V\$IRF7_Q3    | IRF-7      | IRF7   | 0.129306   | 106 |
| V\$FOXJ2_01   | FOXJ2      | FOXJ2  | 0.0450956  | 104 |
| V\$AML1_01    | AML1a      | RUNX1  | 0.00038244 | 104 |
| V\$CP2_01     | CP2        | TFCP2  | 0.575078   | 103 |
| V\$PITX2_01   | PITX2      | PITX2  | 0.429833   | 103 |
| V\$CEBPD_Q6   | C/EBPdelta | CEBPD  | 0.435729   | 97  |
| V\$GATA3_Q3   | GATA-3     | GATA3  | 0.911233   | 91  |
| V\$AML1_Q4    | AML1       | RUNX1  | 0.00038244 | 90  |
| V\$STAT3_Q3   | STAT3      | STAT3  | 0.14508    | 77  |
| V\$CEBPB_Q6   | C/EBPbeta  | CEBPB  | 0.595645   | 76  |
| V\$FOXO4_Q2   | FOXO4      | FOXO4  | 0.956807   | 74  |
| V\$CEBPA_Q1   | C/EBPalpha | CEBPA  | 0.0704602  | 71  |
| V\$P53_Q2     | p53        | TP53   | 0.605075   | 66  |
| V\$IRF1_Q6_Q1 | IRF-1      | IRF1   | 0.337975   | 48  |
| V\$CDP_Q4     | CDP        | CUX1   | 0.361646   | 38  |
| V\$GRE_C      | GR         | NR3C1  | 0.155064   | 16  |

hsa-mir-519e

| Matrix_id      | transcription factor | Gene  | PCC        | Occurrence |
|----------------|----------------------|-------|------------|------------|
| V\$PUR1_Q4     | PUR1                 | PURA  | 0.16005    | 263        |
| V\$PARP_Q4     | PARP                 | PARP1 | 0.0995149  | 254        |
| V\$GKLF_Q4     | GKLF                 | KLF4  | 0.567492   | 246        |
| V\$MAFB_Q1     | MAFB                 | MAFB  | 0.300398   | 241        |
| V\$P300_Q1     | p300                 | EP300 | 0.349573   | 236        |
| V\$SMAD4_Q6_Q1 | Smad4                | SMAD4 | 0.308843   | 223        |
| V\$GR_Q6       | GR                   | NR3C1 | 0.157584   | 201        |
| V\$TBX5_Q2     | TBX5                 | TBX5  | 0.0788559  | 200        |
| V\$YY1_Q1      | YY1                  | YY1   | 0.367543   | 197        |
| V\$AML1_Q6     | AML1                 | RUNX1 | 0.00174447 | 188        |
| V\$DLX5_Q1     | dlx5                 | DLX5  | 0.691609   | 178        |
| V\$YY1_Q6      | YY1                  | YY1   | 0.367543   | 176        |
| V\$YY1_Q6_Q2   | YY1                  | YY1   | 0.367543   | 176        |
| V\$GATA1_Q2    | GATA-1               | GATA1 | 0.0170848  | 173        |
| V\$GATA1_Q6    | GATA-1               | GATA1 | 0.0170848  | 165        |
| V\$GATA2_Q2    | GATA-2               | GATA2 | 0.695429   | 165        |
| V\$GATA1_Q5    | GATA-1               | GATA1 | 0.0170848  | 165        |
| V\$ING4_Q1     | ING4                 | ING4  | 0.116608   | 160        |
| V\$PARP_Q3     | PARP                 | PARP1 | 0.0995149  | 159        |
| V\$TBX5_Q1     | TBX5                 | TBX5  | 0.0788559  | 159        |

|               |            |        |            |     |
|---------------|------------|--------|------------|-----|
| V\$SP1_Q6     | Sp1        | SP1    | 0.34844    | 156 |
| V\$GATA1_Q4   | GATA-1     | GATA1  | 0.0170848  | 148 |
| V\$HMGYIY_Q1  | HMGYIY     | HMGY1  | 0.341965   | 145 |
| V\$GATA3_Q2   | GATA-3     | GATA3  | 0.912183   | 141 |
| V\$ARNT_Q1    | Arnt       | ARNT   | 0.333742   | 134 |
| V\$CEBPE_Q6   | CEBPE      | CEBPE  | 0.0285527  | 121 |
| V\$GR_Q1      | GR         | NR3C1  | 0.157584   | 119 |
| V\$TCF4_Q1    | TCF-4      | TCF7L2 | 0.46753    | 118 |
| V\$TCF4_Q5    | TCF-4      | TCF7L2 | 0.46753    | 111 |
| V\$PITX2_Q2   | Pitx2      | PITX2  | 0.430072   | 111 |
| V\$IRF7_Q3    | IRF-7      | IRF7   | 0.130981   | 107 |
| V\$FOXJ2_Q1   | FOXJ2      | FOXJ2  | 0.0461565  | 106 |
| V\$PITX2_Q1   | PITX2      | PITX2  | 0.430072   | 105 |
| V\$AML1_Q1    | AML1a      | RUNX1  | 0.00174447 | 105 |
| V\$CP2_Q1     | CP2        | TFCP2  | 0.575764   | 103 |
| V\$CEBPD_Q6   | C/EBPdelta | CEBPD  | 0.438292   | 98  |
| V\$GATA3_Q3   | GATA-3     | GATA3  | 0.912183   | 92  |
| V\$AML1_Q4    | AML1       | RUNX1  | 0.00174447 | 90  |
| V\$STAT3_Q3   | STAT3      | STAT3  | 0.146628   | 76  |
| V\$CEBPB_Q6   | C/EBPbeta  | CEBPB  | 0.597165   | 76  |
| V\$FOXO4_Q2   | FOXO4      | FOXO4  | 0.956047   | 75  |
| V\$CEBPA_Q1   | C/EBPalpha | CEBPA  | 0.0713893  | 72  |
| V\$P53_Q2     | p53        | TP53   | 0.605859   | 66  |
| V\$IRF1_Q6_Q1 | IRF-1      | IRF1   | 0.338402   | 49  |
| V\$CDP_Q4     | CDP        | CUX1   | 0.363955   | 38  |
| V\$GRE_C      | GR         | NR3C1  | 0.157584   | 16  |

hsa-mir-520a

| Matrix_id      | transcription factor | Gene  | PCC        | Occurrence |
|----------------|----------------------|-------|------------|------------|
| V\$PUR1_Q4     | PUR1                 | PURA  | 0.16005    | 263        |
| V\$PARP_Q4     | PARP                 | PARP1 | 0.0995149  | 254        |
| V\$GKLF_Q4     | GKLF                 | KLF4  | 0.567492   | 246        |
| V\$MAFB_Q1     | MAFB                 | MAFB  | 0.300398   | 241        |
| V\$P300_Q1     | p300                 | EP300 | 0.349573   | 236        |
| V\$SMAD4_Q6_Q1 | Smad4                | SMAD4 | 0.308843   | 223        |
| V\$GR_Q6       | GR                   | NR3C1 | 0.157584   | 201        |
| V\$TBX5_Q2     | TBX5                 | TBX5  | 0.0788559  | 200        |
| V\$YY1_Q1      | YY1                  | YY1   | 0.367543   | 197        |
| V\$AML1_Q6     | AML1                 | RUNX1 | 0.00174447 | 188        |
| V\$DLX5_Q1     | dlx5                 | DLX5  | 0.691609   | 178        |
| V\$YY1_Q6      | YY1                  | YY1   | 0.367543   | 176        |
| V\$YY1_Q6_Q2   | YY1                  | YY1   | 0.367543   | 176        |

|               |            |        |            |     |
|---------------|------------|--------|------------|-----|
| V\$GATA1_02   | GATA-1     | GATA1  | 0.0170848  | 173 |
| V\$GATA1_06   | GATA-1     | GATA1  | 0.0170848  | 165 |
| V\$GATA2_02   | GATA-2     | GATA2  | 0.695429   | 165 |
| V\$GATA1_05   | GATA-1     | GATA1  | 0.0170848  | 165 |
| V\$ING4_01    | ING4       | ING4   | 0.116608   | 160 |
| V\$PARP_Q3    | PARP       | PARP1  | 0.0995149  | 159 |
| V\$TBX5_01    | TBX5       | TBX5   | 0.0788559  | 159 |
| V\$SP1_Q6     | Sp1        | SP1    | 0.34844    | 156 |
| V\$GATA1_04   | GATA-1     | GATA1  | 0.0170848  | 148 |
| V\$HMGIIY_01  | HMGIIY     | HMGAI1 | 0.341965   | 145 |
| V\$GATA3_02   | GATA-3     | GATA3  | 0.912183   | 141 |
| V\$ARNT_01    | Arnt       | ARNT   | 0.333742   | 134 |
| V\$CEBPE_Q6   | CEBPE      | CEBPE  | 0.0285527  | 121 |
| V\$GR_01      | GR         | NR3C1  | 0.157584   | 119 |
| V\$TCF4_01    | TCF-4      | TCF7L2 | 0.46753    | 118 |
| V\$TCF4_Q5    | TCF-4      | TCF7L2 | 0.46753    | 111 |
| V\$PITX2_Q2   | Pitx2      | PITX2  | 0.430072   | 111 |
| V\$IRF7_Q3    | IRF-7      | IRF7   | 0.130981   | 107 |
| V\$FOXJ2_01   | FOXJ2      | FOXJ2  | 0.0461565  | 106 |
| V\$PITX2_01   | PITX2      | PITX2  | 0.430072   | 105 |
| V\$AML1_01    | AML1a      | RUNX1  | 0.00174447 | 105 |
| V\$CP2_01     | CP2        | TFCP2  | 0.575764   | 103 |
| V\$CEBPD_Q6   | C/EBPdelta | CEBPD  | 0.438292   | 98  |
| V\$GATA3_03   | GATA-3     | GATA3  | 0.912183   | 92  |
| V\$AML1_Q4    | AML1       | RUNX1  | 0.00174447 | 90  |
| V\$STAT3_03   | STAT3      | STAT3  | 0.146628   | 76  |
| V\$CEBPB_Q6   | C/EBPbeta  | CEBPB  | 0.597165   | 76  |
| V\$FOXO4_02   | FOXO4      | FOXO4  | 0.956047   | 75  |
| V\$CEBPA_01   | C/EBPalpha | CEBPA  | 0.0713893  | 72  |
| V\$P53_02     | p53        | TP53   | 0.605859   | 66  |
| V\$IRF1_Q6_01 | IRF-1      | IRF1   | 0.338402   | 49  |
| V\$CDP_04     | CDP        | CUX1   | 0.363955   | 38  |
| V\$GRE_C      | GR         | NR3C1  | 0.157584   | 16  |

hsa-mir-520b

| Matrix_id      | transcription factor | Gene  | PCC      | Occurrence |
|----------------|----------------------|-------|----------|------------|
| V\$PUR1_Q4     | PUR1                 | PURA  | 0.129834 | 256        |
| V\$PARP_Q4     | PARP                 | PARP1 | 0.128049 | 248        |
| V\$GKLF_Q4     | GKLF                 | KLF4  | 0.586135 | 240        |
| V\$MAFB_01     | MAFB                 | MAFB  | 0.262109 | 235        |
| V\$P300_01     | p300                 | EP300 | 0.357818 | 228        |
| V\$SMAD4_Q6_01 | Smad4                | SMAD4 | 0.306016 | 218        |



|               |            |        |           |     |
|---------------|------------|--------|-----------|-----|
| V\$TBX5_02    | TBX5       | TBX5   | 0.0831157 | 199 |
| V\$GR_Q6      | GR         | NR3C1  | 0.126488  | 196 |
| V\$YY1_01     | YY1        | YY1    | 0.389756  | 190 |
| V\$AML1_Q6    | AML1       | RUNX1  | 0.0271627 | 182 |
| V\$DLX5_01    | dlx5       | DLX5   | 0.732704  | 176 |
| V\$YY1_Q6     | YY1        | YY1    | 0.389756  | 172 |
| V\$YY1_Q6_02  | YY1        | YY1    | 0.389756  | 171 |
| V\$GATA1_02   | GATA-1     | GATA1  | 0.0408367 | 171 |
| V\$GATA1_05   | GATA-1     | GATA1  | 0.0408367 | 164 |
| V\$GATA1_06   | GATA-1     | GATA1  | 0.0408367 | 164 |
| V\$GATA2_02   | GATA-2     | GATA2  | 0.681665  | 164 |
| V\$TBX5_01    | TBX5       | TBX5   | 0.0831157 | 158 |
| V\$E12_Q6     | E12        | TCF3   | 0.0161893 | 153 |
| V\$E2A_Q6     | E2A        | TCF3   | 0.0161893 | 153 |
| V\$ING4_01    | ING4       | ING4   | 0.130733  | 152 |
| V\$SP1_Q6     | Sp1        | SP1    | 0.352173  | 152 |
| V\$PARP_Q3    | PARP       | PARP1  | 0.128049  | 152 |
| V\$E47_02     | E47        | TCF3   | 0.0161893 | 151 |
| V\$GATA1_04   | GATA-1     | GATA1  | 0.0408367 | 145 |
| V\$HMGIIY_01  | HMGIIY     | HMGA1  | 0.432412  | 143 |
| V\$GATA3_02   | GATA-3     | GATA3  | 0.897683  | 143 |
| V\$ARNT_01    | Arnt       | ARNT   | 0.312448  | 131 |
| V\$E2A_Q2     | E2A        | TCF3   | 0.0161893 | 131 |
| V\$TCF4_01    | TCF-4      | TCF7L2 | 0.47529   | 117 |
| V\$CEBPE_Q6   | CEBPE      | CEBPE  | 0.0150726 | 117 |
| V\$GR_01      | GR         | NR3C1  | 0.126488  | 113 |
| V\$PITX2_Q2   | Pitx2      | PITX2  | 0.413229  | 108 |
| V\$TCF4_Q5    | TCF-4      | TCF7L2 | 0.47529   | 107 |
| V\$IRF7_Q3    | IRF-7      | IRF7   | 0.0937712 | 104 |
| V\$AML1_01    | AML1a      | RUNX1  | 0.0271627 | 104 |
| V\$FOXJ2_01   | FOXJ2      | FOXJ2  | 0.0851587 | 103 |
| V\$PITX2_01   | PITX2      | PITX2  | 0.413229  | 102 |
| V\$CP2_01     | CP2        | TFCP2  | 0.561315  | 100 |
| V\$CEBPD_Q6   | C/EBPdelta | CEBPD  | 0.401777  | 94  |
| V\$AML1_Q4    | AML1       | RUNX1  | 0.0271627 | 91  |
| V\$GATA3_03   | GATA-3     | GATA3  | 0.897683  | 88  |
| V\$STAT3_03   | STAT3      | STAT3  | 0.127716  | 75  |
| V\$CEBPB_Q6   | C/EBPbeta  | CEBPB  | 0.566453  | 74  |
| V\$FOXO4_02   | FOXO4      | FOXO4  | 0.953303  | 71  |
| V\$CEBPA_01   | C/EBPalpha | CEBPA  | 0.0591953 | 67  |
| V\$P53_02     | p53        | TP53   | 0.622868  | 63  |
| V\$IRF1_Q6_01 | IRF-1      | IRF1   | 0.335772  | 46  |
| V\$CDP_04     | CDP        | CUX1   | 0.339614  | 37  |
| V\$GRE_C      | GR         | NR3C1  | 0.126488  | 14  |

---

hsa-mir-520c

| Matrix_id      | transcription factor | Gene   | PCC       | Occurrence |
|----------------|----------------------|--------|-----------|------------|
| V\$PUR1_Q4     | PUR1                 | PURA   | 0.121906  | 255        |
| V\$PARP_Q4     | PARP                 | PARP1  | 0.134743  | 247        |
| V\$GKLF_Q4     | GKLF                 | KLF4   | 0.588919  | 239        |
| V\$MAFB_01     | MAFB                 | MAFB   | 0.251754  | 234        |
| V\$P300_01     | p300                 | EP300  | 0.358738  | 227        |
| V\$SMAD4_Q6_01 | Smad4                | SMAD4  | 0.304344  | 217        |
| V\$TBX5_02     | TBX5                 | TBX5   | 0.0839126 | 199        |
| V\$GR_Q6       | GR                   | NR3C1  | 0.118351  | 196        |
| V\$YY1_01      | YY1                  | YY1    | 0.39405   | 189        |
| V\$AML1_Q6     | AML1                 | RUNX1  | 0.0334012 | 182        |
| V\$DLX5_01     | dlx5                 | DLX5   | 0.740611  | 176        |
| V\$GATA1_02    | GATA-1               | GATA1  | 0.0466174 | 171        |
| V\$YY1_Q6      | YY1                  | YY1    | 0.39405   | 171        |
| V\$YY1_Q6_02   | YY1                  | YY1    | 0.39405   | 170        |
| V\$GATA1_06    | GATA-1               | GATA1  | 0.0466174 | 164        |
| V\$GATA2_02    | GATA-2               | GATA2  | 0.676084  | 164        |
| V\$GATA1_05    | GATA-1               | GATA1  | 0.0466174 | 164        |
| V\$TBX5_01     | TBX5                 | TBX5   | 0.0839126 | 158        |
| V\$PARP_Q3     | PARP                 | PARP1  | 0.134743  | 153        |
| V\$E2A_Q6      | E2A                  | TCF3   | 0.0315502 | 153        |
| V\$E12_Q6      | E12                  | TCF3   | 0.0315502 | 153        |
| V\$SP1_Q6      | Sp1                  | SP1    | 0.351988  | 151        |
| V\$E47_02      | E47                  | TCF3   | 0.0315502 | 151        |
| V\$ING4_01     | ING4                 | ING4   | 0.133834  | 150        |
| V\$GATA1_04    | GATA-1               | GATA1  | 0.0466174 | 145        |
| V\$GATA3_02    | GATA-3               | GATA3  | 0.891235  | 144        |
| V\$HMGIIY_01   | HMGIIY               | HMGA1  | 0.453548  | 142        |
| V\$E2A_Q2      | E2A                  | TCF3   | 0.0315502 | 131        |
| V\$ARNT_01     | Arnt                 | ARNT   | 0.306161  | 130        |
| V\$TCF4_01     | TCF-4                | TCF7L2 | 0.475717  | 116        |
| V\$CEBPE_Q6    | CEBPE                | CEBPE  | 0.0116709 | 116        |
| V\$GR_01       | GR                   | NR3C1  | 0.118351  | 113        |
| V\$PITX2_Q2    | Pitx2                | PITX2  | 0.407731  | 108        |
| V\$TCF4_Q5     | TCF-4                | TCF7L2 | 0.475717  | 107        |
| V\$AML1_01     | AML1a                | RUNX1  | 0.0334012 | 104        |
| V\$FOXJ2_01    | FOXJ2                | FOXJ2  | 0.0945935 | 103        |
| V\$IRF7_Q3     | IRF-7                | IRF7   | 0.0842163 | 102        |
| V\$PITX2_01    | PITX2                | PITX2  | 0.407731  | 102        |
| V\$CP2_01      | CP2                  | TFCP2  | 0.555944  | 100        |
| V\$CEBPD_Q6    | C/EBPdelta           | CEBPD  | 0.391421  | 92         |
| V\$AML1_Q4     | AML1                 | RUNX1  | 0.0334012 | 91         |

|               |            |       |          |    |
|---------------|------------|-------|----------|----|
| V\$GATA3_03   | GATA-3     | GATA3 | 0.891235 | 88 |
| V\$STAT3_03   | STAT3      | STAT3 | 0.122606 | 76 |
| V\$CEBPB_Q6   | C/EBPbeta  | CEBPB | 0.557019 | 72 |
| V\$FOXO4_02   | FOXO4      | FOXO4 | 0.949605 | 70 |
| V\$CEBPA_01   | C/EBPalpha | CEBPA | 0.055974 | 65 |
| V\$P53_02     | p53        | TP53  | 0.625129 | 63 |
| V\$IRF1_Q6_01 | IRF-1      | IRF1  | 0.334055 | 45 |
| V\$CDP_04     | CDP        | CUX1  | 0.332484 | 36 |
| V\$GRE_C      | GR         | NR3C1 | 0.118351 | 14 |

hsa-mir-520e

| Matrix_id      | transcription factor | Gene   | PCC       | Occurrence |
|----------------|----------------------|--------|-----------|------------|
| V\$PUR1_Q4     | PUR1                 | PURA   | 0.141146  | 262        |
| V\$PARP_Q4     | PARP                 | PARP1  | 0.11796   | 254        |
| V\$GKLF_Q4     | GKLF                 | KLF4   | 0.580731  | 244        |
| V\$MAFB_01     | MAFB                 | MAFB   | 0.276674  | 240        |
| V\$P300_01     | p300                 | EP300  | 0.355662  | 234        |
| V\$SMAD4_Q6_01 | Smad4                | SMAD4  | 0.307769  | 223        |
| V\$TBX5_02     | TBX5                 | TBX5   | 0.0817609 | 201        |
| V\$GR_Q6       | GR                   | NR3C1  | 0.138112  | 201        |
| V\$YY1_01      | YY1                  | YY1    | 0.382588  | 195        |
| V\$AML1_Q6     | AML1                 | RUNX1  | 0.0179696 | 187        |
| V\$DLX5_01     | dlx5                 | DLX5   | 0.719471  | 180        |
| V\$YY1_Q6      | YY1                  | YY1    | 0.382588  | 177        |
| V\$YY1_Q6_02   | YY1                  | YY1    | 0.382588  | 176        |
| V\$GATA1_02    | GATA-1               | GATA1  | 0.0322829 | 173        |
| V\$GATA1_05    | GATA-1               | GATA1  | 0.0322829 | 167        |
| V\$GATA1_06    | GATA-1               | GATA1  | 0.0322829 | 167        |
| V\$GATA2_02    | GATA-2               | GATA2  | 0.68829   | 167        |
| V\$TBX5_01     | TBX5                 | TBX5   | 0.0817609 | 159        |
| V\$ING4_01     | ING4                 | ING4   | 0.125898  | 156        |
| V\$PARP_Q3     | PARP                 | PARP1  | 0.11796   | 156        |
| V\$SP1_Q6      | Sp1                  | SP1    | 0.351646  | 155        |
| V\$GATA1_04    | GATA-1               | GATA1  | 0.0322829 | 147        |
| V\$HMGIIY_01   | HMGIIY               | HMGA1  | 0.400494  | 147        |
| V\$GATA3_02    | GATA-3               | GATA3  | 0.905088  | 144        |
| V\$ARNT_01     | Arnt                 | ARNT   | 0.320942  | 134        |
| V\$CEBPE_Q6    | CEBPE                | CEBPE  | 0.0200177 | 121        |
| V\$TCF4_01     | TCF-4                | TCF7L2 | 0.473588  | 120        |
| V\$GR_01       | GR                   | NR3C1  | 0.138112  | 117        |
| V\$TCF4_Q5     | TCF-4                | TCF7L2 | 0.473588  | 111        |
| V\$PITX2_Q2    | Pitx2                | PITX2  | 0.420341  | 111        |

|               |            |       |           |     |
|---------------|------------|-------|-----------|-----|
| V\$IRF7_Q3    | IRF-7      | IRF7  | 0.107545  | 107 |
| V\$FOXJ2_01   | FOXJ2      | FOXJ2 | 0.0711555 | 107 |
| V\$AML1_01    | AML1a      | RUNX1 | 0.0179696 | 106 |
| V\$CP2_01     | CP2        | TFCP2 | 0.567905  | 103 |
| V\$PITX2_01   | PITX2      | PITX2 | 0.420341  | 103 |
| V\$CEBPD_Q6   | C/EBPdelta | CEBPD | 0.416026  | 98  |
| V\$AML1_Q4    | AML1       | RUNX1 | 0.0179696 | 92  |
| V\$GATA3_03   | GATA-3     | GATA3 | 0.905088  | 91  |
| V\$STAT3_03   | STAT3      | STAT3 | 0.134906  | 77  |
| V\$CEBPB_Q6   | C/EBPbeta  | CEBPB | 0.578978  | 77  |
| V\$FOXO4_02   | FOXO4      | FOXO4 | 0.956558  | 75  |
| V\$CEBPA_01   | C/EBPalpha | CEBPA | 0.0637764 | 71  |
| V\$P53_02     | p53        | TP53  | 0.618147  | 66  |
| V\$IRF1_Q6_01 | IRF-1      | IRF1  | 0.337524  | 47  |
| V\$CDP_04     | CDP        | CUX1  | 0.349283  | 38  |
| V\$GRE_C      | GR         | NR3C1 | 0.138112  | 14  |

hsa-mir-520f

| Matrix_id      | transcription factor | Gene   | PCC        | Occurrence |
|----------------|----------------------|--------|------------|------------|
| V\$PUR1_Q4     | PUR1                 | PURA   | 0.111474   | 249        |
| V\$PARP_Q4     | PARP                 | PARP1  | 0.143112   | 241        |
| V\$GKLF_Q4     | GKLF                 | KLF4   | 0.591415   | 233        |
| V\$MAFB_01     | MAFB                 | MAFB   | 0.237958   | 228        |
| V\$P300_01     | p300                 | EP300  | 0.359259   | 221        |
| V\$SMAD4_Q6_01 | Smad4                | SMAD4  | 0.30163    | 212        |
| V\$NFAT4_Q3    | NF-AT4               | NFATC3 | 0.00337426 | 207        |
| V\$TBX5_02     | TBX5                 | TBX5   | 0.0847834  | 194        |
| V\$GR_Q6       | GR                   | NR3C1  | 0.107657   | 190        |
| V\$YY1_01      | YY1                  | YY1    | 0.398849   | 187        |
| V\$AML1_Q6     | AML1                 | RUNX1  | 0.0413699  | 179        |
| V\$DLX5_01     | dlx5                 | DLX5   | 0.749421   | 170        |
| V\$YY1_Q6      | YY1                  | YY1    | 0.398849   | 166        |
| V\$YY1_Q6_02   | YY1                  | YY1    | 0.398849   | 165        |
| V\$GATA1_02    | GATA-1               | GATA1  | 0.0539723  | 165        |
| V\$GATA2_02    | GATA-2               | GATA2  | 0.66765    | 158        |
| V\$GATA1_06    | GATA-1               | GATA1  | 0.0539723  | 158        |
| V\$GATA1_05    | GATA-1               | GATA1  | 0.0539723  | 158        |
| V\$TBX5_01     | TBX5                 | TBX5   | 0.0847834  | 155        |
| V\$E12_Q6      | E12                  | TCF3   | 0.0512653  | 149        |
| V\$E2A_Q6      | E2A                  | TCF3   | 0.0512653  | 149        |
| V\$PARP_Q3     | PARP                 | PARP1  | 0.143112   | 148        |
| V\$SP1_Q6      | Sp1                  | SP1    | 0.351098   | 148        |

|               |            |        |            |     |
|---------------|------------|--------|------------|-----|
| V\$E47_02     | E47        | TCF3   | 0.0512653  | 147 |
| V\$ING4_01    | ING4       | ING4   | 0.137579   | 146 |
| V\$HMGYIY_01  | HMGYIY     | HMGA1  | 0.479917   | 139 |
| V\$GATA1_04   | GATA-1     | GATA1  | 0.0539723  | 139 |
| V\$GATA3_02   | GATA-3     | GATA3  | 0.881288   | 138 |
| V\$ARNT_01    | Arnt       | ARNT   | 0.297503   | 129 |
| V\$E2A_Q2     | E2A        | TCF3   | 0.0512653  | 127 |
| V\$TCF4_01    | TCF-4      | TCF7L2 | 0.475388   | 114 |
| V\$CEBPE_Q6   | CEBPE      | CEBPE  | 0.00727047 | 113 |
| V\$GR_01      | GR         | NR3C1  | 0.107657   | 111 |
| V\$TCF4_Q5    | TCF-4      | TCF7L2 | 0.475388   | 106 |
| V\$PITX2_Q2   | Pitx2      | PITX2  | 0.399899   | 104 |
| V\$AML1_01    | AML1a      | RUNX1  | 0.0413699  | 102 |
| V\$FOXJ2_01   | FOXJ2      | FOXJ2  | 0.106564   | 101 |
| V\$PITX2_01   | PITX2      | PITX2  | 0.399899   | 99  |
| V\$CP2_01     | CP2        | TFCP2  | 0.548003   | 98  |
| V\$IRF7_Q3    | IRF-7      | IRF7   | 0.0717609  | 98  |
| V\$CEBPD_Q6   | C/EBPdelta | CEBPD  | 0.377366   | 91  |
| V\$AML1_Q4    | AML1       | RUNX1  | 0.0413699  | 89  |
| V\$GATA3_03   | GATA-3     | GATA3  | 0.881288   | 86  |
| V\$STAT3_03   | STAT3      | STAT3  | 0.115802   | 73  |
| V\$CEBPB_Q6   | C/EBPbeta  | CEBPB  | 0.543846   | 71  |
| V\$FOXO4_02   | FOXO4      | FOXO4  | 0.943089   | 69  |
| V\$CEBPA_01   | C/EBPalpha | CEBPA  | 0.0517239  | 64  |
| V\$P53_02     | p53        | TP53   | 0.626885   | 60  |
| V\$IRF1_Q6_01 | IRF-1      | IRF1   | 0.331228   | 43  |
| V\$CDP_04     | CDP        | CUX1   | 0.32269    | 36  |
| V\$GRE_C      | GR         | NR3C1  | 0.107657   | 14  |

hsa-mir-521-2

| Matrix_id      | transcription factor | Gene  | PCC        | Occurrence |
|----------------|----------------------|-------|------------|------------|
| V\$PUR1_Q4     | PUR1                 | PURA  | 0.16005    | 263        |
| V\$PARP_Q4     | PARP                 | PARP1 | 0.0995149  | 254        |
| V\$GKLF_Q4     | GKLF                 | KLF4  | 0.567492   | 246        |
| V\$MAFB_01     | MAFB                 | MAFB  | 0.300398   | 241        |
| V\$P300_01     | p300                 | EP300 | 0.349573   | 236        |
| V\$SMAD4_Q6_01 | Smad4                | SMAD4 | 0.308843   | 223        |
| V\$GR_Q6       | GR                   | NR3C1 | 0.157584   | 201        |
| V\$TBX5_02     | TBX5                 | TBX5  | 0.0788559  | 200        |
| V\$YY1_01      | YY1                  | YY1   | 0.367543   | 197        |
| V\$AML1_Q6     | AML1                 | RUNX1 | 0.00174447 | 188        |
| V\$DLX5_01     | dlx5                 | DLX5  | 0.691609   | 178        |

|               |            |        |            |     |
|---------------|------------|--------|------------|-----|
| V\$YY1_Q6     | YY1        | YY1    | 0.367543   | 176 |
| V\$YY1_Q6_02  | YY1        | YY1    | 0.367543   | 176 |
| V\$GATA1_02   | GATA-1     | GATA1  | 0.0170848  | 173 |
| V\$GATA1_06   | GATA-1     | GATA1  | 0.0170848  | 165 |
| V\$GATA2_02   | GATA-2     | GATA2  | 0.695429   | 165 |
| V\$GATA1_05   | GATA-1     | GATA1  | 0.0170848  | 165 |
| V\$ING4_01    | ING4       | ING4   | 0.116608   | 160 |
| V\$PARP_Q3    | PARP       | PARP1  | 0.0995149  | 159 |
| V\$TBX5_01    | TBX5       | TBX5   | 0.0788559  | 159 |
| V\$SP1_Q6     | Sp1        | SP1    | 0.34844    | 156 |
| V\$GATA1_04   | GATA-1     | GATA1  | 0.0170848  | 148 |
| V\$HMGIIY_01  | HMGIIY     | HMGAI  | 0.341965   | 145 |
| V\$GATA3_02   | GATA-3     | GATA3  | 0.912183   | 141 |
| V\$ARNT_01    | Arnt       | ARNT   | 0.333742   | 134 |
| V\$CEBPE_Q6   | CEBPE      | CEBPE  | 0.0285527  | 121 |
| V\$GR_01      | GR         | NR3C1  | 0.157584   | 119 |
| V\$TCF4_01    | TCF-4      | TCF7L2 | 0.46753    | 118 |
| V\$TCF4_Q5    | TCF-4      | TCF7L2 | 0.46753    | 111 |
| V\$PITX2_Q2   | Pitx2      | PITX2  | 0.430072   | 111 |
| V\$IRF7_Q3    | IRF-7      | IRF7   | 0.130981   | 107 |
| V\$FOXJ2_01   | FOXJ2      | FOXJ2  | 0.0461565  | 106 |
| V\$PITX2_01   | PITX2      | PITX2  | 0.430072   | 105 |
| V\$AML1_01    | AML1a      | RUNX1  | 0.00174447 | 105 |
| V\$CP2_01     | CP2        | TFCP2  | 0.575764   | 103 |
| V\$CEBPD_Q6   | C/EBPdelta | CEBPD  | 0.438292   | 98  |
| V\$GATA3_03   | GATA-3     | GATA3  | 0.912183   | 92  |
| V\$AML1_Q4    | AML1       | RUNX1  | 0.00174447 | 90  |
| V\$STAT3_03   | STAT3      | STAT3  | 0.146628   | 76  |
| V\$CEBPB_Q6   | C/EBPbeta  | CEBPB  | 0.597165   | 76  |
| V\$FOXO4_02   | FOXO4      | FOXO4  | 0.956047   | 75  |
| V\$CEBPA_01   | C/EBPalpha | CEBPA  | 0.0713893  | 72  |
| V\$P53_02     | p53        | TP53   | 0.605859   | 66  |
| V\$IRF1_Q6_01 | IRF-1      | IRF1   | 0.338402   | 49  |
| V\$CDP_04     | CDP        | CUX1   | 0.363955   | 38  |
| V\$GRE_C      | GR         | NR3C1  | 0.157584   | 16  |

hsa-mir-523

| Matrix_id  | transcription factor | Gene  | PCC       | Occurrence |
|------------|----------------------|-------|-----------|------------|
| V\$PUR1_Q4 | PUR1                 | PURA  | 0.16005   | 263        |
| V\$PARP_Q4 | PARP                 | PARP1 | 0.0995149 | 254        |
| V\$GKLF_Q4 | GKLF                 | KLF4  | 0.567492  | 246        |
| V\$MAFB_01 | MAFB                 | MAFB  | 0.300398  | 241        |

|                |            |        |            |     |
|----------------|------------|--------|------------|-----|
| V\$P300_01     | p300       | EP300  | 0.349573   | 236 |
| V\$SMAD4_Q6_01 | Smad4      | SMAD4  | 0.308843   | 223 |
| V\$GR_Q6       | GR         | NR3C1  | 0.157584   | 201 |
| V\$TBX5_02     | TBX5       | TBX5   | 0.0788559  | 200 |
| V\$YY1_01      | YY1        | YY1    | 0.367543   | 197 |
| V\$AML1_Q6     | AML1       | RUNX1  | 0.00174447 | 188 |
| V\$DLX5_01     | dlx5       | DLX5   | 0.691609   | 178 |
| V\$YY1_Q6      | YY1        | YY1    | 0.367543   | 176 |
| V\$YY1_Q6_02   | YY1        | YY1    | 0.367543   | 176 |
| V\$GATA1_02    | GATA-1     | GATA1  | 0.0170848  | 173 |
| V\$GATA1_06    | GATA-1     | GATA1  | 0.0170848  | 165 |
| V\$GATA2_02    | GATA-2     | GATA2  | 0.695429   | 165 |
| V\$GATA1_05    | GATA-1     | GATA1  | 0.0170848  | 165 |
| V\$ING4_01     | ING4       | ING4   | 0.116608   | 160 |
| V\$PARP_Q3     | PARP       | PARP1  | 0.0995149  | 159 |
| V\$TBX5_01     | TBX5       | TBX5   | 0.0788559  | 159 |
| V\$SP1_Q6      | Sp1        | SP1    | 0.34844    | 156 |
| V\$GATA1_04    | GATA-1     | GATA1  | 0.0170848  | 148 |
| V\$HMG1Y_01    | HMG1Y      | HMGA1  | 0.341965   | 145 |
| V\$GATA3_02    | GATA-3     | GATA3  | 0.912183   | 141 |
| V\$ARNT_01     | Arnt       | ARNT   | 0.333742   | 134 |
| V\$CEBPE_Q6    | CEBPE      | CEBPE  | 0.0285527  | 121 |
| V\$GR_01       | GR         | NR3C1  | 0.157584   | 119 |
| V\$TCF4_01     | TCF-4      | TCF7L2 | 0.46753    | 118 |
| V\$TCF4_Q5     | TCF-4      | TCF7L2 | 0.46753    | 111 |
| V\$PITX2_Q2    | Pitx2      | PITX2  | 0.430072   | 111 |
| V\$IRF7_Q3     | IRF-7      | IRF7   | 0.130981   | 107 |
| V\$FOXJ2_01    | FOXJ2      | FOXJ2  | 0.0461565  | 106 |
| V\$PITX2_01    | PITX2      | PITX2  | 0.430072   | 105 |
| V\$AML1_01     | AML1a      | RUNX1  | 0.00174447 | 105 |
| V\$CP2_01      | CP2        | TFCP2  | 0.575764   | 103 |
| V\$CEBPD_Q6    | C/EBPdelta | CEBPD  | 0.438292   | 98  |
| V\$GATA3_03    | GATA-3     | GATA3  | 0.912183   | 92  |
| V\$AML1_Q4     | AML1       | RUNX1  | 0.00174447 | 90  |
| V\$STAT3_03    | STAT3      | STAT3  | 0.146628   | 76  |
| V\$CEBPB_Q6    | C/EBPbeta  | CEBPB  | 0.597165   | 76  |
| V\$FOXO4_02    | FOXO4      | FOXO4  | 0.956047   | 75  |
| V\$CEBPA_01    | C/EBPalpha | CEBPA  | 0.0713893  | 72  |
| V\$P53_02      | p53        | TP53   | 0.605859   | 66  |
| V\$IRF1_Q6_01  | IRF-1      | IRF1   | 0.338402   | 49  |
| V\$CDP_04      | CDP        | CUX1   | 0.363955   | 38  |
| V\$GRE_C       | GR         | NR3C1  | 0.157584   | 16  |

| Matrix_id      | transcription factor | Gene   | PCC        | Occurrence |
|----------------|----------------------|--------|------------|------------|
| V\$PUR1_Q4     | PUR1                 | PURA   | 0.16005    | 263        |
| V\$PARP_Q4     | PARP                 | PARP1  | 0.0995149  | 254        |
| V\$GKLF_Q4     | GKLF                 | KLF4   | 0.567492   | 246        |
| V\$MAFB_Q1     | MAFB                 | MAFB   | 0.300398   | 241        |
| V\$P300_Q1     | p300                 | EP300  | 0.349573   | 236        |
| V\$SMAD4_Q6_Q1 | Smad4                | SMAD4  | 0.308843   | 223        |
| V\$GR_Q6       | GR                   | NR3C1  | 0.157584   | 201        |
| V\$TBX5_Q2     | TBX5                 | TBX5   | 0.0788559  | 200        |
| V\$YY1_Q1      | YY1                  | YY1    | 0.367543   | 197        |
| V\$AML1_Q6     | AML1                 | RUNX1  | 0.00174447 | 188        |
| V\$DLX5_Q1     | dlx5                 | DLX5   | 0.691609   | 178        |
| V\$YY1_Q6      | YY1                  | YY1    | 0.367543   | 176        |
| V\$YY1_Q6_Q2   | YY1                  | YY1    | 0.367543   | 176        |
| V\$GATA1_Q2    | GATA-1               | GATA1  | 0.0170848  | 173        |
| V\$GATA1_Q6    | GATA-1               | GATA1  | 0.0170848  | 165        |
| V\$GATA2_Q2    | GATA-2               | GATA2  | 0.695429   | 165        |
| V\$GATA1_Q5    | GATA-1               | GATA1  | 0.0170848  | 165        |
| V\$ING4_Q1     | ING4                 | ING4   | 0.116608   | 160        |
| V\$PARP_Q3     | PARP                 | PARP1  | 0.0995149  | 159        |
| V\$TBX5_Q1     | TBX5                 | TBX5   | 0.0788559  | 159        |
| V\$SP1_Q6      | Sp1                  | SP1    | 0.34844    | 156        |
| V\$GATA1_Q4    | GATA-1               | GATA1  | 0.0170848  | 148        |
| V\$HMG1Y_Q1    | HMG1Y                | HMGA1  | 0.341965   | 145        |
| V\$GATA3_Q2    | GATA-3               | GATA3  | 0.912183   | 141        |
| V\$ARNT_Q1     | Arnt                 | ARNT   | 0.333742   | 134        |
| V\$CEBPE_Q6    | CEBPE                | CEBPE  | 0.0285527  | 121        |
| V\$GR_Q1       | GR                   | NR3C1  | 0.157584   | 119        |
| V\$TCF4_Q1     | TCF-4                | TCF7L2 | 0.46753    | 118        |
| V\$TCF4_Q5     | TCF-4                | TCF7L2 | 0.46753    | 111        |
| V\$PITX2_Q2    | Pitx2                | PITX2  | 0.430072   | 111        |
| V\$IRF7_Q3     | IRF-7                | IRF7   | 0.130981   | 107        |
| V\$FOXJ2_Q1    | FOXJ2                | FOXJ2  | 0.0461565  | 106        |
| V\$PITX2_Q1    | PITX2                | PITX2  | 0.430072   | 105        |
| V\$AML1_Q1     | AML1a                | RUNX1  | 0.00174447 | 105        |
| V\$CP2_Q1      | CP2                  | TFCP2  | 0.575764   | 103        |
| V\$CEBPD_Q6    | C/EBPdelta           | CEBPD  | 0.438292   | 98         |
| V\$GATA3_Q3    | GATA-3               | GATA3  | 0.912183   | 92         |
| V\$AML1_Q4     | AML1                 | RUNX1  | 0.00174447 | 90         |
| V\$STAT3_Q3    | STAT3                | STAT3  | 0.146628   | 76         |
| V\$CEBPB_Q6    | C/EBPbeta            | CEBPB  | 0.597165   | 76         |
| V\$FOXO4_Q2    | FOXO4                | FOXO4  | 0.956047   | 75         |
| V\$CEBPA_Q1    | C/EBPalpha           | CEBPA  | 0.0713893  | 72         |
| V\$P53_Q2      | p53                  | TP53   | 0.605859   | 66         |



|               |       |       |          |    |
|---------------|-------|-------|----------|----|
| V\$IRF1_Q6_01 | IRF-1 | IRF1  | 0.338402 | 49 |
| V\$CDP_04     | CDP   | CUX1  | 0.363955 | 38 |
| V\$GRE_C      | GR    | NR3C1 | 0.157584 | 16 |

hsa-mir-525

| Matrix_id      | transcription factor | Gene   | PCC        | Occurrence |
|----------------|----------------------|--------|------------|------------|
| V\$PUR1_Q4     | PUR1                 | PURA   | 0.16005    | 263        |
| V\$PARP_Q4     | PARP                 | PARP1  | 0.0995149  | 254        |
| V\$GKLF_Q4     | GKLF                 | KLF4   | 0.567492   | 246        |
| V\$MAFB_01     | MAFB                 | MAFB   | 0.300398   | 241        |
| V\$P300_01     | p300                 | EP300  | 0.349573   | 236        |
| V\$SMAD4_Q6_01 | Smad4                | SMAD4  | 0.308843   | 223        |
| V\$GR_Q6       | GR                   | NR3C1  | 0.157584   | 201        |
| V\$TBX5_02     | TBX5                 | TBX5   | 0.0788559  | 200        |
| V\$YY1_01      | YY1                  | YY1    | 0.367543   | 197        |
| V\$AML1_Q6     | AML1                 | RUNX1  | 0.00174447 | 188        |
| V\$DLX5_01     | dlx5                 | DLX5   | 0.691609   | 178        |
| V\$YY1_Q6      | YY1                  | YY1    | 0.367543   | 176        |
| V\$YY1_Q6_02   | YY1                  | YY1    | 0.367543   | 176        |
| V\$GATA1_02    | GATA-1               | GATA1  | 0.0170848  | 173        |
| V\$GATA1_06    | GATA-1               | GATA1  | 0.0170848  | 165        |
| V\$GATA2_02    | GATA-2               | GATA2  | 0.695429   | 165        |
| V\$GATA1_05    | GATA-1               | GATA1  | 0.0170848  | 165        |
| V\$ING4_01     | ING4                 | ING4   | 0.116608   | 160        |
| V\$PARP_Q3     | PARP                 | PARP1  | 0.0995149  | 159        |
| V\$TBX5_01     | TBX5                 | TBX5   | 0.0788559  | 159        |
| V\$SP1_Q6      | Sp1                  | SP1    | 0.34844    | 156        |
| V\$GATA1_04    | GATA-1               | GATA1  | 0.0170848  | 148        |
| V\$HMG1Y_01    | HMG1Y                | HMGA1  | 0.341965   | 145        |
| V\$GATA3_02    | GATA-3               | GATA3  | 0.912183   | 141        |
| V\$ARNT_01     | Arnt                 | ARNT   | 0.333742   | 134        |
| V\$CEBPE_Q6    | CEBPE                | CEBPE  | 0.0285527  | 121        |
| V\$GR_01       | GR                   | NR3C1  | 0.157584   | 119        |
| V\$TCF4_01     | TCF-4                | TCF7L2 | 0.46753    | 118        |
| V\$TCF4_Q5     | TCF-4                | TCF7L2 | 0.46753    | 111        |
| V\$PITX2_Q2    | Pitx2                | PITX2  | 0.430072   | 111        |
| V\$IRF7_Q3     | IRF-7                | IRF7   | 0.130981   | 107        |
| V\$FOXJ2_01    | FOXJ2                | FOXJ2  | 0.0461565  | 106        |
| V\$PITX2_01    | PITX2                | PITX2  | 0.430072   | 105        |
| V\$AML1_01     | AML1a                | RUNX1  | 0.00174447 | 105        |
| V\$CP2_01      | CP2                  | TFCP2  | 0.575764   | 103        |
| V\$CEBPD_Q6    | C/EBPdelta           | CEBPD  | 0.438292   | 98         |

|               |            |       |            |    |
|---------------|------------|-------|------------|----|
| V\$GATA3_03   | GATA-3     | GATA3 | 0.912183   | 92 |
| V\$AML1_Q4    | AML1       | RUNX1 | 0.00174447 | 90 |
| V\$STAT3_03   | STAT3      | STAT3 | 0.146628   | 76 |
| V\$CEBPB_Q6   | C/EBPbeta  | CEBPB | 0.597165   | 76 |
| V\$FOXO4_02   | FOXO4      | FOXO4 | 0.956047   | 75 |
| V\$CEBPA_01   | C/EBPalpha | CEBPA | 0.0713893  | 72 |
| V\$P53_02     | p53        | TP53  | 0.605859   | 66 |
| V\$IRF1_Q6_01 | IRF-1      | IRF1  | 0.338402   | 49 |
| V\$CDP_04     | CDP        | CUX1  | 0.363955   | 38 |
| V\$GRE_C      | GR         | NR3C1 | 0.157584   | 16 |

hsa-mir-526a-1

| Matrix_id      | transcription factor | Gene   | PCC        | Occurrence |
|----------------|----------------------|--------|------------|------------|
| V\$PUR1_Q4     | PUR1                 | PURA   | 0.16005    | 263        |
| V\$PARP_Q4     | PARP                 | PARP1  | 0.0995149  | 254        |
| V\$GKLF_Q4     | GKLF                 | KLF4   | 0.567492   | 246        |
| V\$MAFB_01     | MAFB                 | MAFB   | 0.300398   | 241        |
| V\$P300_01     | p300                 | EP300  | 0.349573   | 236        |
| V\$SMAD4_Q6_01 | Smad4                | SMAD4  | 0.308843   | 223        |
| V\$GR_Q6       | GR                   | NR3C1  | 0.157584   | 201        |
| V\$TBX5_02     | TBX5                 | TBX5   | 0.0788559  | 200        |
| V\$YY1_01      | YY1                  | YY1    | 0.367543   | 197        |
| V\$AML1_Q6     | AML1                 | RUNX1  | 0.00174447 | 188        |
| V\$DLX5_01     | dlx5                 | DLX5   | 0.691609   | 178        |
| V\$YY1_Q6      | YY1                  | YY1    | 0.367543   | 176        |
| V\$YY1_Q6_02   | YY1                  | YY1    | 0.367543   | 176        |
| V\$GATA1_02    | GATA-1               | GATA1  | 0.0170848  | 173        |
| V\$GATA1_06    | GATA-1               | GATA1  | 0.0170848  | 165        |
| V\$GATA2_02    | GATA-2               | GATA2  | 0.695429   | 165        |
| V\$GATA1_05    | GATA-1               | GATA1  | 0.0170848  | 165        |
| V\$ING4_01     | ING4                 | ING4   | 0.116608   | 160        |
| V\$PARP_Q3     | PARP                 | PARP1  | 0.0995149  | 159        |
| V\$TBX5_01     | TBX5                 | TBX5   | 0.0788559  | 159        |
| V\$SP1_Q6      | Sp1                  | SP1    | 0.34844    | 156        |
| V\$GATA1_04    | GATA-1               | GATA1  | 0.0170848  | 148        |
| V\$HMGY1_01    | HMGY1                | HMGY1  | 0.341965   | 145        |
| V\$GATA3_02    | GATA-3               | GATA3  | 0.912183   | 141        |
| V\$ARNT_01     | Arnt                 | ARNT   | 0.333742   | 134        |
| V\$CEBPE_Q6    | CEBPE                | CEBPE  | 0.0285527  | 121        |
| V\$GR_01       | GR                   | NR3C1  | 0.157584   | 119        |
| V\$TCF4_01     | TCF-4                | TCF7L2 | 0.46753    | 118        |
| V\$TCF4_Q5     | TCF-4                | TCF7L2 | 0.46753    | 111        |

|               |            |       |            |     |
|---------------|------------|-------|------------|-----|
| V\$PITX2_Q2   | Pitx2      | PITX2 | 0.430072   | 111 |
| V\$IRF7_Q3    | IRF-7      | IRF7  | 0.130981   | 107 |
| V\$FOXJ2_01   | FOXJ2      | FOXJ2 | 0.0461565  | 106 |
| V\$PITX2_01   | PITX2      | PITX2 | 0.430072   | 105 |
| V\$AML1_01    | AML1a      | RUNX1 | 0.00174447 | 105 |
| V\$CP2_01     | CP2        | TFCP2 | 0.575764   | 103 |
| V\$CEBPD_Q6   | C/EBPdelta | CEBPD | 0.438292   | 98  |
| V\$GATA3_03   | GATA-3     | GATA3 | 0.912183   | 92  |
| V\$AML1_Q4    | AML1       | RUNX1 | 0.00174447 | 90  |
| V\$STAT3_03   | STAT3      | STAT3 | 0.146628   | 76  |
| V\$CEBPB_Q6   | C/EBPbeta  | CEBPB | 0.597165   | 76  |
| V\$FOXO4_02   | FOXO4      | FOXO4 | 0.956047   | 75  |
| V\$CEBPA_01   | C/EBPalpha | CEBPA | 0.0713893  | 72  |
| V\$P53_Q2     | p53        | TP53  | 0.605859   | 66  |
| V\$IRF1_Q6_01 | IRF-1      | IRF1  | 0.338402   | 49  |
| V\$CDP_04     | CDP        | CUX1  | 0.363955   | 38  |
| V\$GRE_C      | GR         | NR3C1 | 0.157584   | 16  |

hsa-mir-526b

| Matrix_id      | transcription factor | Gene  | PCC        | Occurrence |
|----------------|----------------------|-------|------------|------------|
| V\$PUR1_Q4     | PUR1                 | PURA  | 0.16005    | 263        |
| V\$PARP_Q4     | PARP                 | PARP1 | 0.0995149  | 254        |
| V\$GKLF_Q4     | GKLF                 | KLF4  | 0.567492   | 246        |
| V\$MAFB_01     | MAFB                 | MAFB  | 0.300398   | 241        |
| V\$P300_01     | p300                 | EP300 | 0.349573   | 236        |
| V\$SMAD4_Q6_01 | Smad4                | SMAD4 | 0.308843   | 223        |
| V\$GR_Q6       | GR                   | NR3C1 | 0.157584   | 201        |
| V\$TBX5_02     | TBX5                 | TBX5  | 0.0788559  | 200        |
| V\$YY1_01      | YY1                  | YY1   | 0.367543   | 197        |
| V\$AML1_Q6     | AML1                 | RUNX1 | 0.00174447 | 188        |
| V\$DLX5_01     | dlx5                 | DLX5  | 0.691609   | 178        |
| V\$YY1_Q6      | YY1                  | YY1   | 0.367543   | 176        |
| V\$YY1_Q6_02   | YY1                  | YY1   | 0.367543   | 176        |
| V\$GATA1_02    | GATA-1               | GATA1 | 0.0170848  | 173        |
| V\$GATA1_06    | GATA-1               | GATA1 | 0.0170848  | 165        |
| V\$GATA2_02    | GATA-2               | GATA2 | 0.695429   | 165        |
| V\$GATA1_05    | GATA-1               | GATA1 | 0.0170848  | 165        |
| V\$ING4_01     | ING4                 | ING4  | 0.116608   | 160        |
| V\$PARP_Q3     | PARP                 | PARP1 | 0.0995149  | 159        |
| V\$TBX5_01     | TBX5                 | TBX5  | 0.0788559  | 159        |
| V\$SP1_Q6      | Sp1                  | SP1   | 0.34844    | 156        |
| V\$GATA1_04    | GATA-1               | GATA1 | 0.0170848  | 148        |

|               |            |        |            |     |
|---------------|------------|--------|------------|-----|
| V\$HMGYIY_01  | HMGYIY     | HMGA1  | 0.341965   | 145 |
| V\$GATA3_02   | GATA-3     | GATA3  | 0.912183   | 141 |
| V\$ARNT_01    | Arnt       | ARNT   | 0.333742   | 134 |
| V\$CEBPE_Q6   | CEBPE      | CEBPE  | 0.0285527  | 121 |
| V\$GR_01      | GR         | NR3C1  | 0.157584   | 119 |
| V\$TCF4_01    | TCF-4      | TCF7L2 | 0.46753    | 118 |
| V\$TCF4_Q5    | TCF-4      | TCF7L2 | 0.46753    | 111 |
| V\$PITX2_Q2   | Pitx2      | PITX2  | 0.430072   | 111 |
| V\$IRF7_Q3    | IRF-7      | IRF7   | 0.130981   | 107 |
| V\$FOXJ2_01   | FOXJ2      | FOXJ2  | 0.0461565  | 106 |
| V\$PITX2_01   | PITX2      | PITX2  | 0.430072   | 105 |
| V\$AML1_01    | AML1a      | RUNX1  | 0.00174447 | 105 |
| V\$CP2_01     | CP2        | TFCP2  | 0.575764   | 103 |
| V\$CEBPD_Q6   | C/EBPdelta | CEBPD  | 0.438292   | 98  |
| V\$GATA3_03   | GATA-3     | GATA3  | 0.912183   | 92  |
| V\$AML1_Q4    | AML1       | RUNX1  | 0.00174447 | 90  |
| V\$STAT3_03   | STAT3      | STAT3  | 0.146628   | 76  |
| V\$CEBPB_Q6   | C/EBPbeta  | CEBPB  | 0.597165   | 76  |
| V\$FOXO4_02   | FOXO4      | FOXO4  | 0.956047   | 75  |
| V\$CEBPA_01   | C/EBPalpha | CEBPA  | 0.0713893  | 72  |
| V\$P53_02     | p53        | TP53   | 0.605859   | 66  |
| V\$IRF1_Q6_01 | IRF-1      | IRF1   | 0.338402   | 49  |
| V\$CDP_04     | CDP        | CUX1   | 0.363955   | 38  |
| V\$GRE_C      | GR         | NR3C1  | 0.157584   | 16  |

hsa-mir-7-3

| Matrix_id      | transcription factor | Gene   | PCC       | Occurrence |
|----------------|----------------------|--------|-----------|------------|
| V\$PARP_Q4     | PARP                 | PARP1  | 0.0747165 | 43         |
| V\$GABPA_Q4    | GABP-alpha           | GABPA  | 0.0231452 | 34         |
| V\$YY1_01      | YY1                  | YY1    | 0.0404993 | 34         |
| V\$MEF2C_Q4    | MEF-2C               | MEF2C  | 0.0811236 | 34         |
| V\$GATA6_01    | GATA-6               | GATA6  | 0.627543  | 32         |
| V\$HNF4A_Q6_01 | HNF-4alpha           | HNF4A  | 0.169696  | 32         |
| V\$YY1_Q6_02   | YY1                  | YY1    | 0.0404993 | 31         |
| V\$YY1_Q6      | YY1                  | YY1    | 0.0404993 | 31         |
| V\$PITX3_Q2    | PITX3                | PITX3  | 0.498045  | 28         |
| V\$YY1_Q6_03   | YY1                  | YY1    | 0.0404993 | 27         |
| V\$PBX1_04     | Pbx1                 | PBX1   | 0.24639   | 26         |
| V\$CRX_Q4      | Crx                  | CRX    | 0.0679382 | 25         |
| V\$PARP_Q3     | PARP                 | PARP1  | 0.0747165 | 25         |
| V\$ELK1_02     | Elk-1                | ELK1   | 0.216887  | 23         |
| V\$SREBP1_Q6   | SREBP-1              | SREBF1 | 0.786694  | 21         |

|             |       |         |           |    |
|-------------|-------|---------|-----------|----|
| V\$CREM_Q6  | CREM  | CREM    | 0.464418  | 21 |
| V\$NKX22_02 | NKX2B | NKX2-2  | 0.116087  | 20 |
| V\$NKX2B_Q3 | NKX2B | NKX2-2  | 0.116087  | 18 |
| V\$STAT3_03 | STAT3 | STAT3   | 0.0791977 | 18 |
| V\$IRF8_Q6  | IRF-8 | IRF8    | 0.117009  | 17 |
| V\$FOXJ2_01 | FOXJ2 | FOXJ2   | 0.155797  | 16 |
| V\$CP2_01   | CP2   | TFCP2   | 0.218646  | 14 |
| V\$HNF6_Q6  | HNF6  | ONECUT1 | 0.432245  | 14 |
| V\$ATF4_Q6  | ATF-4 | ATF4    | 0.0365872 | 13 |
| V\$OC2_Q3   | OC-2  | ONECUT2 | 0.122353  | 12 |
| V\$STAT1_05 | STAT1 | STAT1   | 0.0326217 | 10 |
| V\$CIZ_01   | CIZ   | ZNF384  | 0.276404  | 10 |
| V\$STAT1_Q6 | STAT1 | STAT1   | 0.0326217 | 7  |
| V\$FOXJ2_02 | FOXJ2 | FOXJ2   | 0.155797  | 6  |

hsa-mir-9-1

| Matrix_id      | transcription factor | Gene   | PCC       | Occurrence |
|----------------|----------------------|--------|-----------|------------|
| V\$PUR1_Q4     | PUR1                 | PURA   | 0.418516  | 494        |
| V\$PARP_Q4     | PARP                 | PARP1  | 0.420723  | 450        |
| V\$ZIC3_01     | Zic3                 | ZIC3   | 0.195803  | 447        |
| V\$SOX9_Q4     | SOX9                 | SOX9   | 0.239554  | 395        |
| V\$TBP_Q6      | TBP                  | TBP    | 0.0239134 | 387        |
| V\$YY1_01      | YY1                  | YY1    | 0.101384  | 361        |
| V\$GR_Q6       | GR                   | NR3C1  | 0.0589527 | 355        |
| V\$MEF2C_Q4    | MEF-2C               | MEF2C  | 0.810655  | 352        |
| V\$YY1_Q6      | YY1                  | YY1    | 0.101384  | 333        |
| V\$YY1_Q6_02   | YY1                  | YY1    | 0.101384  | 333        |
| V\$ZBP89_Q4    | ZBP89                | ZNF148 | 0.115985  | 296        |
| V\$PARP_Q3     | PARP                 | PARP1  | 0.420723  | 289        |
| V\$HNF3B_Q6    | HNF-3beta            | FOXA2  | 0.0570425 | 275        |
| V\$FOXO3A_Q1   | FOXO3A               | FOXO3  | 0.0449524 | 265        |
| V\$PBX1_04     | Pbx1                 | PBX1   | 0.236112  | 262        |
| V\$PITX3_Q2    | PITX3                | PITX3  | 0.0440164 | 261        |
| V\$SREBP1_Q6   | SREBP-1              | SREBF1 | 0.0269379 | 218        |
| V\$IRF8_Q6     | IRF-8                | IRF8   | 0.0927724 | 216        |
| V\$CEBPG_Q6_01 | C/EBPgamma           | CEBPG  | 0.127674  | 157        |
| V\$FAC1_01     | FAC1                 | BPTF   | 0.142423  | 152        |
| V\$LHX3b_01    | LHX3b                | LHX3   | 0.0166661 | 150        |
| V\$NURR1_Q3    | NURR1                | NR4A2  | 0.135327  | 150        |
| V\$YY1_02      | YY1                  | YY1    | 0.101384  | 143        |
| V\$HOXB8_01    | HOXB8                | HOXB8  | 0.317406  | 106        |
| V\$YY1_03      | YY1                  | YY1    | 0.101384  | 86         |

|               |      |       |          |    |
|---------------|------|-------|----------|----|
| V\$ERR3_Q2    | ERR3 | ESRRG | 0.102072 | 77 |
| V\$ERR3_Q2_01 | ERR3 | ESRRG | 0.102072 | 60 |

hsa-mir-9-2

| Matrix_id      | transcription factor | Gene          | PCC        | Occurrence |
|----------------|----------------------|---------------|------------|------------|
| V\$PUR1_Q4     | PUR1                 | PURA          | 0.418516   | 494        |
| V\$MAFB_01     | MAFB                 | MAFB          | 0.166082   | 456        |
| V\$PARP_Q4     | PARP                 | PARP1         | 0.420723   | 450        |
| V\$ZIC3_01     | Zic3                 | ZIC3          | 0.195803   | 447        |
| V\$ETS2_Q6     | c-Ets-2              | ETS2          | 0.189664   | 410        |
| V\$GABPA_Q4    | GABP-alpha           | GABPA         | 0.13762    | 397        |
| V\$SOX9_Q4     | SOX9                 | SOX9          | 0.239554   | 395        |
| V\$TBP_Q6      | TBP                  | TBP           | 0.0239134  | 387        |
| V\$AP4_Q6_02   | AP-4                 | TFAP4         | 0.411949   | 369        |
| V\$MAZ_Q6      | MAZ                  | MAZ           | 0.224203   | 363        |
| V\$YY1_01      | YY1                  | YY1           | 0.101384   | 361        |
| V\$MEF2C_Q4    | MEF-2C               | MEF2C         | 0.810655   | 352        |
| V\$YY1_Q6      | YY1                  | YY1           | 0.101384   | 333        |
| V\$YY1_Q6_02   | YY1                  | YY1           | 0.101384   | 333        |
| V\$DLX5_01     | dlx5                 | DLX5          | 0.009445   | 328        |
| V\$SOX9_B1     | SOX9                 | SOX9          | 0.239554   | 324        |
| V\$SRY_02      | SRY                  | SRY           | 0.176672   | 295        |
| V\$PARP_Q3     | PARP                 | PARP1         | 0.420723   | 289        |
| V\$ING4_01     | ING4                 | ING4          | 0.692803   | 286        |
| V\$HNF3B_Q6    | HNF-3beta            | FOXA2         | 0.0570425  | 275        |
| V\$FOXO3A_Q1   | FOXO3A               | FOXO3         | 0.0449524  | 265        |
| V\$PBX1_04     | Pbx1                 | PBX1          | 0.236112   | 262        |
| V\$HIF1A_Q6    | HIF-1alpha           | HIF1A         | 0.00335261 | 259        |
| V\$AP4_Q5      | AP-4                 | TFAP4         | 0.411949   | 255        |
| V\$YY1_Q6_03   | YY1                  | YY1           | 0.101384   | 251        |
| V\$AP4_Q6      | AP-4                 | TFAP4         | 0.411949   | 233        |
| V\$IRF8_Q6     | IRF-8                | IRF8          | 0.0927724  | 216        |
| V\$CREM_Q6     | CREM                 | CREM          | 0.0272754  | 214        |
| V\$SOX10_Q6    | SOX10                | SOX10         | 0.724748   | 209        |
| V\$AP4_Q6_01   | AP-4                 | TFAP4         | 0.411949   | 162        |
| V\$CEBPG_Q6_01 | C/EBPgamma           | CEBPG         | 0.127674   | 157        |
| V\$NURR1_Q3    | NURR1                | NR4A2         | 0.135327   | 150        |
| V\$DBP_Q6_01   | DBP                  | DBP           | 0.267264   | 148        |
| V\$MSX1_01     | Msx-1                | MSX1          | 0.188893   | 119        |
| V\$AP4_01      | AP-4                 | TFAP4         | 0.411949   | 107        |
| V\$HOXB8_01    | HOXB8                | HOXB8         | 0.317406   | 106        |
| V\$DEC2_Q2     |                      | 2-Dec BHLHE41 | 0.67018    | 97         |

|              |        |        |            |    |
|--------------|--------|--------|------------|----|
| V\$USF2_Q6   | USF2   | USF2   | 0.33501    | 87 |
| V\$POU6F1_03 | POU6F1 | POU6F1 | 0.399284   | 66 |
| V\$POU6F1_02 | POU6F1 | POU6F1 | 0.399284   | 52 |
| V\$ZID_01    | ZID    | ZBTB6  | 0.00176523 | 46 |
| V\$POU6F1_01 | POU6F1 | POU6F1 | 0.399284   | 34 |
| V\$CDP_02    | CDP    | CUX1   | 0.0621111  | 15 |

hsa-mir-9-3

| Matrix_id     | transcription factor | Gene   | PCC        | Occurrence |
|---------------|----------------------|--------|------------|------------|
| V\$PUR1_Q4    | PUR1                 | PURA   | 0.418516   | 494        |
| V\$MAFB_01    | MAFB                 | MAFB   | 0.166082   | 456        |
| V\$PARP_Q4    | PARP                 | PARP1  | 0.420723   | 450        |
| V\$ETS2_Q6    | c-Ets-2              | ETS2   | 0.189664   | 410        |
| V\$GABPA_Q4   | GABP-alpha           | GABPA  | 0.13762    | 397        |
| V\$TBP_Q6     | TBP                  | TBP    | 0.0239134  | 387        |
| V\$AP4_Q6_02  | AP-4                 | TFAP4  | 0.411949   | 369        |
| V\$YY1_01     | YY1                  | YY1    | 0.101384   | 361        |
| V\$GR_Q6      | GR                   | NR3C1  | 0.0589527  | 355        |
| V\$ETS2_B     | c-Ets-2              | ETS2   | 0.189664   | 334        |
| V\$YY1_Q6     | YY1                  | YY1    | 0.101384   | 333        |
| V\$YY1_Q6_02  | YY1                  | YY1    | 0.101384   | 333        |
| V\$ZBP89_Q4   | ZBP89                | ZNF148 | 0.115985   | 296        |
| V\$ING4_01    | ING4                 | ING4   | 0.692803   | 286        |
| V\$ELK1_02    | Elk-1                | ELK1   | 0.112507   | 275        |
| V\$PBX1_04    | Pbx1                 | PBX1   | 0.236112   | 262        |
| V\$HIF1A_Q6   | HIF-1alpha           | HIF1A  | 0.00335261 | 259        |
| V\$MAZ_Q6_01  | MAZ                  | MAZ    | 0.224203   | 257        |
| V\$AP4_Q5     | AP-4                 | TFAP4  | 0.411949   | 255        |
| V\$KLF15_Q2   | KLF15                | KLF15  | 0.0387339  | 223        |
| V\$IRF8_Q6    | IRF-8                | IRF8   | 0.0927724  | 216        |
| V\$CREM_Q6    | CREM                 | CREM   | 0.0272754  | 214        |
| V\$CP2_01     | CP2                  | TFCP2  | 0.250059   | 175        |
| V\$ATF1_Q6_01 | ATF-1                | ATF1   | 0.00366055 | 169        |
| V\$SP4_Q5     | SP4                  | SP4    | 0.039477   | 165        |
| V\$FAC1_01    | FAC1                 | BPTF   | 0.142423   | 152        |
| V\$NURR1_Q3   | NURR1                | NR4A2  | 0.135327   | 150        |
| V\$ATF4_Q6    | ATF-4                | ATF4   | 0.0789839  | 116        |
| V\$ATF2_Q5    | ATF-2                | ATF2   | 0.0167795  | 81         |
| V\$PAX5_01    | Pax-5                | PAX5   | 0.0167537  | 18         |

hsa-mir-95

| Matrix_id      | transcription factor | Gene     | PCC       | Occurrence |
|----------------|----------------------|----------|-----------|------------|
| V\$PUR1_Q4     | PUR1                 | PURA     | 0.440369  | 2045       |
| V\$IK_Q5       | Ikaros               | IKZF1    | 0.766584  | 2000       |
| V\$PARP_Q4     | PARP                 | PARP1    | 0.65494   | 1983       |
| V\$PEA3_Q6     | PEA3                 | ETV4     | 0.752847  | 1948       |
| V\$P300_01     | p300                 | EP300    | 0.820295  | 1905       |
| V\$MYB_Q6      | c-Myb                | MYB      | 0.273058  | 1749       |
| V\$CMYB_Q5     | c-Myb                | MYB      | 0.273058  | 1749       |
| V\$SMAD4_Q6_01 | Smad4                | SMAD4    | 0.714806  | 1734       |
| V\$TBP_Q6      | TBP                  | TBP      | 0.219236  | 1730       |
| V\$CDX2_Q5_02  | CDX-2                | CDX2     | 0.857089  | 1730       |
| V\$NFAT4_Q3    | NF-AT4               | NFATC3   | 0.531771  | 1713       |
| V\$TBX5_02     | TBX5                 | TBX5     | 0.769689  | 1680       |
| V\$CETS1_Q6    | C-ets-1              | ETS1     | 0.381904  | 1672       |
| V\$ETS1_B      | c-Ets-1              | ETS1     | 0.381904  | 1658       |
| V\$NR1B2_Q6    | NR1B2                | RARB     | 0.688062  | 1658       |
| V\$GATA1_01    | GATA-1               | GATA1    | 0.433141  | 1646       |
| V\$ETS2_Q6     | c-Ets-2              | ETS2     | 0.680785  | 1603       |
| V\$YY1_01      | YY1                  | YY1      | 0.466767  | 1588       |
| V\$GABPA_Q4    | GABP-alpha           | GABPA    | 0.498469  | 1587       |
| V\$MEF2C_Q4    | MEF-2C               | MEF2C    | 0.514804  | 1583       |
| V\$GR_Q6       | GR                   | NR3C1    | 0.713436  | 1559       |
| V\$DLX5_01     | dlx5                 | DLX5     | 0.124737  | 1552       |
| V\$NANOG_02    | Nanog                | NANOG    | 0.911473  | 1546       |
| V\$Elf5_03     | ELF5                 | ELF5     | 0.0321759 | 1529       |
| V\$SOX5_01     | SOX5                 | SOX5     | 0.468268  | 1498       |
| V\$IPF1_01     | IPF1                 | PDX1     | 0.902338  | 1497       |
| V\$SPI1_03     | SPI1                 | SPI1     | 0.166441  | 1483       |
| V\$ETS2_B      | c-Ets-2              | ETS2     | 0.680785  | 1433       |
| V\$IPF1_Q6     | IPF1                 | PDX1     | 0.902338  | 1425       |
| V\$YY1_Q6      | YY1                  | YY1      | 0.466767  | 1422       |
| V\$GATA1_05    | GATA-1               | GATA1    | 0.433141  | 1408       |
| V\$GATA1_06    | GATA-1               | GATA1    | 0.433141  | 1408       |
| V\$GATA2_02    | GATA-2               | GATA2    | 0.369201  | 1408       |
| V\$SPI1_Q5     | SPI1                 | SPI1     | 0.166441  | 1386       |
| V\$IPF1_Q4_01  | IPF1                 | PDX1     | 0.902338  | 1374       |
| V\$BEN_01      | BEN                  | GTF2IRD1 | 0.915067  | 1369       |
| V\$CDX2_Q5_01  | Cdx-2                | CDX2     | 0.857089  | 1366       |
| V\$SRY_02      | SRY                  | SRY      | 0.675973  | 1361       |
| V\$YY1_Q6_02   | YY1                  | YY1      | 0.466767  | 1352       |
| V\$NKX32_01    | Nkx3-2               | NKX3-2   | 0.809063  | 1308       |
| V\$CDX2_01     | Cdx-2                | CDX2     | 0.857089  | 1308       |
| V\$PARP_Q3     | PARP                 | PARP1    | 0.65494   | 1288       |



|                |            |         |           |      |
|----------------|------------|---------|-----------|------|
| V\$FOXO3A_Q1   | FOXO3A     | FOXO3   | 0.631679  | 1283 |
| V\$NFAT2_Q5    | NF-AT2     | NFATC1  | 0.848469  | 1262 |
| V\$IRF4_Q6     | IRF-4      | IRF4    | 0.85156   | 1252 |
| V\$ERBETA_Q5   | ER-beta    | ESR2    | 0.697212  | 1231 |
| V\$MAZ_Q6      | MAZ        | MAZ     | 0.196312  | 1228 |
| V\$TEL1_Q2     | TEL1       | ETV6    | 0.913405  | 1184 |
| V\$E2A_Q6      | E2A        | TCF3    | 0.701162  | 1179 |
| V\$E12_Q6      | E12        | TCF3    | 0.701162  | 1178 |
| V\$ELK1_Q2     | Elk-1      | ELK1    | 0.626416  | 1178 |
| V\$E47_Q2      | E47        | TCF3    | 0.701162  | 1172 |
| V\$MYOD_Q6_Q1  | MyoD       | MYOD1   | 0.80511   | 1170 |
| V\$CRX_Q4      | Crx        | CRX     | 0.681139  | 1155 |
| V\$ETV3_Q2     | ETV3       | ETV3    | 0.435371  | 1146 |
| V\$IPF1_Q4     | IPF1       | PDX1    | 0.902338  | 1143 |
| V\$ER71_Q2     | ER71       | ETV2    | 0.338935  | 1126 |
| V\$YY1_Q6_Q3   | YY1        | YY1     | 0.466767  | 1119 |
| V\$GFI1_Q6     | Gfi1       | GFI1    | 0.315518  | 1074 |
| V\$ELK1_Q6     | ELK-1      | ELK1    | 0.626416  | 1070 |
| V\$MYOGENIN_Q6 | myogenin   | MYOG    | 0.761651  | 1068 |
| V\$LEF1_Q5     | LEF-1      | LEF1    | 0.016484  | 1068 |
| V\$TCF3_Q1     | TCF-3      | TCF7L1  | 0.675858  | 1067 |
| V\$HNF1_Q2     | HNF-1alpha | HNF1A   | 0.66645   | 1062 |
| V\$GFI1_Q6_Q1  | Gfi1       | GFI1    | 0.315518  | 1049 |
| V\$HIF1A_Q6    | HIF-1alpha | HIF1A   | 0.0885175 | 1049 |
| V\$CEBPE_Q6    | CEBPE      | CEBPE   | 0.153452  | 1042 |
| V\$ARNT_Q1     | Arnt       | ARNT    | 0.739741  | 1038 |
| V\$AP2ALPHA_Q6 | AP-2alpha  | TFAP2A  | 0.0850891 | 1024 |
| V\$IRF8_Q6     | IRF-8      | IRF8    | 0.0216152 | 998  |
| V\$FOXP3_Q1    | FOXP3      | FOXP3   | 0.826706  | 993  |
| V\$FOXM1_Q1    | FOXM1      | FOXM1   | 0.17449   | 991  |
| V\$AP2ALPHA_Q1 | AP-2alpha  | TFAP2A  | 0.0850891 | 978  |
| V\$CMYB_Q1     | c-Myb      | MYB     | 0.273058  | 964  |
| V\$ERF_Q2      | ERF        | ERF     | 0.453723  | 963  |
| V\$PITX2_Q1    | PITX2      | PITX2   | 0.745591  | 958  |
| V\$EHF_Q3      | EHF        | EHF     | 0.224708  | 944  |
| V\$OC2_Q3      | OC-2       | ONECUT2 | 0.73376   | 940  |
| V\$CMAF_Q1     | c-Maf      | MAF     | 0.42115   | 920  |
| V\$E2A_Q2      | E2A        | TCF3    | 0.701162  | 919  |
| V\$GFI1B_Q1    | Gfi1b      | GFI1B   | 0.857762  | 910  |
| V\$CRX_Q4_Q1   | CRX        | CRX     | 0.681139  | 883  |
| V\$ERR1_Q3     | ERR1       | ESRRA   | 0.687804  | 841  |
| V\$ELF5_Q1     | ELF5       | ELF5    | 0.0321759 | 825  |
| V\$BCL6_Q3_Q1  | Bcl-6      | BCL6    | 0.918328  | 797  |
| V\$CEBPD_Q6    | C/EBPdelta | CEBPD   | 0.175743  | 762  |
| V\$NEUROD_Q2   | NeuroD     | NEUROD1 | 0.871325  | 732  |
| V\$E47_Q1      | E47        | TCF3    | 0.701162  | 722  |

|              |           |          |           |     |
|--------------|-----------|----------|-----------|-----|
| V\$ZIC1_01   | Zic1      | ZIC1     | 0.266484  | 715 |
| V\$HOXD9_Q2  | Hoxd9     | HOXD9    | 0.592089  | 694 |
| V\$LHX3b_01  | LHX3b     | LHX3     | 0.778417  | 690 |
| V\$PIT1_Q6   | Pit-1     | POU1F1   | 0.311721  | 690 |
| V\$MYOD_Q6   | MyoD      | MYOD1    | 0.80511   | 690 |
| V\$DBP_Q6_01 | DBP       | DBP      | 0.880217  | 679 |
| V\$DAX1_01   | Dax1      | NR0B1    | 0.550275  | 659 |
| V\$CEBPB_Q6  | C/EBPbeta | CEBPB    | 0.208978  | 653 |
| V\$ERG_03    | ERG       | ERG      | 0.72351   | 641 |
| V\$PET1_02   | Pet-1     | FEV      | 0.501743  | 640 |
| V\$AML2_01   | AML2      | RUNX3    | 0.313156  | 613 |
| V\$NCX_02    | Ncx       | TLX2     | 0.763032  | 591 |
| V\$IPF1_02   | IPF1      | PDX1     | 0.902338  | 584 |
| V\$HNF6_Q6   | HNF6      | ONECUT1  | 0.191297  | 578 |
| V\$CART1_02  | CART1     | ALX1     | 0.814604  | 559 |
| V\$HOX13_02  | HOXA5     | HOXA5    | 0.0466749 | 523 |
| V\$HOXB8_01  | HOXB8     | HOXB8    | 0.521114  | 510 |
| V\$IPF1_06   | ipf1      | PDX1     | 0.902338  | 503 |
| V\$MYOD_01   | MyoD      | MYOD1    | 0.80511   | 492 |
| V\$IPF1_03   | IPF1      | PDX1     | 0.902338  | 474 |
| V\$HTF4_Q2   | HTF4      | TCF12    | 0.596694  | 450 |
| V\$SOX2_Q6   | SOX2      | SOX2     | 0.274732  | 391 |
| V\$LHX3_01   | Lhx3      | LHX3     | 0.778417  | 367 |
| V\$BEN_02    | BEN       | GTF2IRD1 | 0.915067  | 361 |
| V\$CEBPB_01  | C/EBPbeta | CEBPB    | 0.208978  | 330 |
| V\$HNF1B_01  | HNF-1beta | HNF1B    | 0.434836  | 324 |
| V\$NUR77_Q5  | NUR77     | NR4A1    | 0.515472  | 269 |
| V\$RREB1_01  | RREB-1    | RREB1    | 0.731149  | 234 |
| V\$GLI_Q2    | GLI       | GLI1     | 0.368034  | 223 |
| V\$GLI2_01   | GLI2      | GLI2     | 0.869929  | 152 |
| V\$GLI3_02   | GLI3      | GLI3     | 0.774868  | 148 |

hsa-mir-96

| Matrix_id     | transcription factor | Gene  | PCC      | Occurrence |
|---------------|----------------------|-------|----------|------------|
| V\$ELF1_Q6    | Elf-1                | ELF1  | 0.402265 | 19         |
| V\$MYB_Q6     | c-Myb                | MYB   | 0.750565 | 18         |
| V\$IK_Q5      | Ikaros               | IKZF1 | 0.257737 | 18         |
| V\$CMYB_Q5    | c-Myb                | MYB   | 0.750565 | 18         |
| V\$GATA3_01   | GATA-3               | GATA3 | 0.13135  | 12         |
| V\$GATA3_02   | GATA-3               | GATA3 | 0.13135  | 12         |
| V\$GFI1_Q6_01 | Gfi1                 | GFI1  | 0.6067   | 9          |
| V\$LEF1_Q5    | LEF-1                | LEF1  | 0.839296 | 9          |

|             |       |        |           |   |
|-------------|-------|--------|-----------|---|
| V\$ZABC1_01 | ZABC1 | ZNF217 | 0.0426443 | 7 |
|-------------|-------|--------|-----------|---|

hsa-mir-98

| Matrix_id      | transcription factor | Gene   | PCC        | Occurrence |
|----------------|----------------------|--------|------------|------------|
| V\$PUR1_Q4     | PUR1                 | PURA   | 0.530866   | 150        |
| V\$AP2REP_01   | AP-2rep              | KLF12  | 0.036882   | 141        |
| V\$ELF1_Q6     | Elf-1                | ELF1   | 0.00846873 | 138        |
| V\$MAFB_01     | MAFB                 | MAFB   | 0.104388   | 137        |
| V\$ZIC3_01     | Zic3                 | ZIC3   | 0.476204   | 136        |
| V\$P300_01     | p300                 | EP300  | 0.100704   | 135        |
| V\$PARP_Q4     | PARP                 | PARP1  | 0.449885   | 135        |
| V\$NR1B2_Q6    | NR1B2                | RARB   | 0.21982    | 124        |
| V\$SOX9_Q4     | SOX9                 | SOX9   | 0.300195   | 123        |
| V\$CDX2_Q5_02  | CDX-2                | CDX2   | 0.0604623  | 115        |
| V\$TBP_Q6      | TBP                  | TBP    | 0.0559374  | 115        |
| V\$YY1_01      | YY1                  | YY1    | 0.313048   | 110        |
| V\$HNF4A_Q6_01 | HNF-4alpha           | HNF4A  | 0.256104   | 107        |
| V\$AP4_Q6_02   | AP-4                 | TFAP4  | 0.550676   | 106        |
| V\$GR_Q6       | GR                   | NR3C1  | 0.260696   | 104        |
| V\$AML1_Q6     | AML1                 | RUNX1  | 0.0381445  | 103        |
| V\$SOX5_01     | SOX5                 | SOX5   | 0.0736912  | 100        |
| V\$MEF2C_Q4    | MEF-2C               | MEF2C  | 0.668841   | 99         |
| V\$SOX9_B1     | SOX9                 | SOX9   | 0.300195   | 98         |
| V\$YY1_Q6      | YY1                  | YY1    | 0.313048   | 98         |
| V\$IPF1_Q6     | IPF1                 | PDX1   | 0.147463   | 94         |
| V\$YY1_Q6_02   | YY1                  | YY1    | 0.313048   | 94         |
| V\$NANOG_02    | Nanog                | NANOG  | 0.0691387  | 94         |
| V\$GATA1_05    | GATA-1               | GATA1  | 0.116816   | 92         |
| V\$GATA1_06    | GATA-1               | GATA1  | 0.116816   | 92         |
| V\$IPF1_Q4_01  | IPF1                 | PDX1   | 0.147463   | 91         |
| V\$PARP_Q3     | PARP                 | PARP1  | 0.449885   | 90         |
| V\$GATA1_02    | GATA-1               | GATA1  | 0.116816   | 90         |
| V\$HIF1A_Q6    | HIF-1alpha           | HIF1A  | 0.154434   | 90         |
| V\$TFIIQ_Q6    | TFII-I               | GTF2I  | 0.484154   | 90         |
| V\$CDX2_01     | Cdx-2                | CDX2   | 0.0604623  | 88         |
| V\$CDX2_Q5_01  | Cdx-2                | CDX2   | 0.0604623  | 88         |
| V\$SRX_02      | SRX                  | SRX    | 0.129506   | 87         |
| V\$IPF1_01     | IPF1                 | PDX1   | 0.147463   | 86         |
| V\$ELK1_02     | Elk-1                | ELK1   | 0.353587   | 85         |
| V\$TEL1_02     | TEL1                 | ETV6   | 0.0655315  | 85         |
| V\$NKX32_01    | Nkx3-2               | NKX3-2 | 0.0646674  | 82         |
| V\$HNF1_02     | HNF-1alpha           | HNF1A  | 0.045051   | 80         |

|               |         |               |           |    |
|---------------|---------|---------------|-----------|----|
| V\$PBX1_Q3    | Pbx1    | PBX1          | 0.328616  | 80 |
| V\$NFAT2_Q5   | NF-AT2  | NFATC1        | 0.0286644 | 80 |
| V\$YY1_Q6_Q3  | YY1     | YY1           | 0.313048  | 79 |
| V\$TCF3_Q1    | TCF-3   | TCF7L1        | 0.088662  | 77 |
| V\$GATA1_Q4   | GATA-1  | GATA1         | 0.116816  | 76 |
| V\$FOXO3A_Q1  | FOXO3A  | FOXO3         | 0.175065  | 76 |
| V\$PBX1_Q4    | Pbx1    | PBX1          | 0.328616  | 75 |
| V\$CREM_Q6    | CREM    | CREM          | 0.197366  | 74 |
| V\$CMYB_Q1    | c-Myb   | MYB           | 0.129934  | 67 |
| V\$FOXJ2_Q1   | FOXJ2   | FOXJ2         | 0.119345  | 66 |
| V\$GFI1_Q6    | Gfi1    | GFI1          | 0.171663  | 66 |
| V\$GFI1_Q6_Q1 | Gfi1    | GFI1          | 0.171663  | 64 |
| V\$LEF1_Q5    | LEF-1   | LEF1          | 0.045179  | 63 |
| V\$SOX10_Q6   | SOX10   | SOX10         | 0.626052  | 59 |
| V\$OC2_Q3     | OC-2    | ONECUT2       | 0.224795  | 57 |
| V\$SREBP1_Q6  | SREBP-1 | SREBF1        | 0.234367  | 57 |
| V\$BCL6_Q3_Q1 | Bcl-6   | BCL6          | 0.0800593 | 56 |
| V\$ATF1_Q6_Q1 | ATF-1   | ATF1          | 0.114852  | 56 |
| V\$AML1_Q1    | AML1a   | RUNX1         | 0.0381445 | 55 |
| V\$CMAF_Q1    | c-Maf   | MAF           | 0.240619  | 53 |
| V\$GR_Q1      | GR      | NR3C1         | 0.260696  | 53 |
| V\$NURR1_Q3   | NURR1   | NR4A2         | 0.314579  | 51 |
| V\$GFI1B_Q1   | Gfi1b   | GFI1B         | 0.023968  | 51 |
| V\$NKX32_Q2   | Nkx3-2  | NKX3-2        | 0.0646674 | 50 |
| V\$PAX8_Q1    | Pax-8   | PAX8          | 0.23018   | 49 |
| V\$FAC1_Q1    | FAC1    | BPTF          | 0.0432653 | 46 |
| V\$DAX1_Q1    | Dax1    | NR0B1         | 0.0763903 | 46 |
| V\$LHX3b_Q1   | LHX3b   | LHX3          | 0.252668  | 45 |
| V\$HOXA9_Q1   | hoxa9   | HOXA9         | 0.190252  | 45 |
| V\$NKX2B_Q3   | NKX2B   | NKX2-2        | 0.725863  | 43 |
| V\$DEC2_Q2    |         | 2-Dec BHLHE41 | 0.582114  | 41 |
| V\$ATF4_Q6    | ATF-4   | ATF4          | 0.135251  | 41 |
| V\$NKX22_Q2   | NKX2B   | NKX2-2        | 0.725863  | 40 |
| V\$HOXD9_Q2   | Hoxd9   | HOXD9         | 0.153101  | 39 |
| V\$CART1_Q2   | CART1   | ALX1          | 0.151738  | 38 |
| V\$HNF6_Q6    | HNF6    | ONECUT1       | 0.0205047 | 37 |
| V\$HOX13_Q2   | HOXA5   | HOXA5         | 0.116842  | 36 |
| V\$HOXB8_Q1   | HOXB8   | HOXB8         | 0.565587  | 34 |
| V\$IPF1_Q6    | ipf1    | PDX1          | 0.147463  | 34 |
| V\$NCX_Q2     | Ncx     | TLX2          | 0.0515589 | 33 |
| V\$IPF1_Q3    | IPF1    | PDX1          | 0.147463  | 33 |
| V\$ATF2_Q5    | ATF-2   | ATF2          | 0.204797  | 27 |
| V\$LHX3_Q1    | Lhx3    | LHX3          | 0.252668  | 27 |
| V\$USF2_Q6    | USF2    | USF2          | 0.471535  | 25 |
| V\$NMYC_Q1    | N-Myc   | MYCN          | 0.0147076 | 25 |
| V\$SOX2_Q6    | SOX2    | SOX2          | 0.544709  | 25 |

|              |           |        |           |    |
|--------------|-----------|--------|-----------|----|
| V\$MAX_01    | Max       | MAX    | 0.664848  | 25 |
| V\$STAT4_Q5  | STAT4     | STAT4  | 0.157358  | 24 |
| V\$CDP_04    | CDP       | CUX1   | 0.201871  | 22 |
| V\$HNF1B_01  | HNF-1beta | HNF1B  | 0.235226  | 20 |
| V\$HSF1_01   | HSF1      | HSF1   | 0.0820563 | 16 |
| V\$SREBP1_01 | SREBP-1   | SREBF1 | 0.234367  | 12 |
| V\$POU6F1_01 | POU6F1    | POU6F1 | 0.593997  | 11 |
| V\$EVI1_06   | Evi-1     | MECOM  | 0.0641628 | 6  |

hsa-mir-99b

| Matrix_id      | transcription factor | Gene   | PCC        | Occurrence |
|----------------|----------------------|--------|------------|------------|
| V\$PUR1_Q4     | PUR1                 | PURA   | 0.242859   | 174        |
| V\$PARP_Q4     | PARP                 | PARP1  | 0.140581   | 170        |
| V\$ELF1_Q6     | Elf-1                | ELF1   | 0.0332038  | 167        |
| V\$GKLF_Q4     | GKLF                 | KLF4   | 0.513914   | 165        |
| V\$ETS1_B      | c-Ets-1              | ETS1   | 0.00359139 | 157        |
| V\$ZIC3_01     | Zic3                 | ZIC3   | 0.00854804 | 156        |
| V\$SMAD4_Q6_01 | Smad4                | SMAD4  | 0.207056   | 154        |
| V\$CETS1_Q6    | C-ets-1              | ETS1   | 0.00359139 | 151        |
| V\$GATA1_01    | GATA-1               | GATA1  | 0.0176781  | 146        |
| V\$GABPA_Q4    | GABP-alpha           | GABPA  | 0.26928    | 144        |
| V\$GR_Q6       | GR                   | NR3C1  | 0.0845845  | 131        |
| V\$YY1_01      | YY1                  | YY1    | 0.366003   | 129        |
| V\$TBP_Q6      | TBP                  | TBP    | 0.217618   | 129        |
| V\$MAZ_Q6      | MAZ                  | MAZ    | 0.0145113  | 121        |
| V\$GATA1_02    | GATA-1               | GATA1  | 0.0176781  | 114        |
| V\$GATA6_01    | GATA-6               | GATA6  | 0.120907   | 112        |
| V\$GATA2_02    | GATA-2               | GATA2  | 0.585385   | 112        |
| V\$GATA1_06    | GATA-1               | GATA1  | 0.0176781  | 112        |
| V\$GATA1_05    | GATA-1               | GATA1  | 0.0176781  | 112        |
| V\$PARP_Q3     | PARP                 | PARP1  | 0.140581   | 110        |
| V\$AHR_Q5      | AhR                  | AHR    | 0.850182   | 109        |
| V\$AP2ALPHA_Q6 | AP-2alpha            | TFAP2A | 0.837976   | 105        |
| V\$SP1_Q6      | Sp1                  | SP1    | 0.250004   | 103        |
| V\$ING4_01     | ING4                 | ING4   | 0.223996   | 103        |
| V\$FKLF_Q5     | FKLF                 | KLF11  | 0.226701   | 99         |
| V\$GATA3_01    | GATA-3               | GATA3  | 0.793724   | 97         |
| V\$MAZ_Q6_01   | MAZ                  | MAZ    | 0.0145113  | 95         |
| V\$TFIIQ6      | TFII-I               | GTF2I  | 0.0742778  | 95         |
| V\$GATA1_04    | GATA-1               | GATA1  | 0.0176781  | 94         |
| V\$SP1_Q6_01   | Sp1                  | SP1    | 0.250004   | 93         |
| V\$AP2ALPHA_01 | AP-2alpha            | TFAP2A | 0.837976   | 92         |

|                |           |        |            |    |
|----------------|-----------|--------|------------|----|
| V\$GATA3_02    | GATA-3    | GATA3  | 0.793724   | 92 |
| V\$YY1_Q6_03   | YY1       | YY1    | 0.366003   | 89 |
| V\$SP1_Q4_01   | Sp1       | SP1    | 0.250004   | 89 |
| V\$SP1_Q2_01   | Sp1       | SP1    | 0.250004   | 88 |
| V\$GATA2_01    | GATA-2    | GATA2  | 0.585385   | 87 |
| V\$SP1_01      | Sp1       | SP1    | 0.250004   | 85 |
| V\$SP1_02      | SP1       | SP1    | 0.250004   | 82 |
| V\$GR_01       | GR        | NR3C1  | 0.0845845  | 82 |
| V\$ELK1_02     | Elk-1     | ELK1   | 0.118397   | 77 |
| V\$CP2_01      | CP2       | TFCP2  | 0.595874   | 74 |
| V\$TCF4_Q5     | TCF-4     | TCF7L2 | 0.414844   | 72 |
| V\$FOXJ2_01    | FOXJ2     | FOXJ2  | 0.0448589  | 72 |
| V\$ELK1_06     | ELK-1     | ELK1   | 0.118397   | 69 |
| V\$ZABC1_01    | ZABC1     | ZNF217 | 0.688671   | 66 |
| V\$CREM_Q6     | CREM      | CREM   | 0.300086   | 66 |
| V\$GABPBETA_Q3 | GABP-beta | GABPB1 | 0.220132   | 62 |
| V\$SP2_01      | SP2       | SP2    | 0.173129   | 61 |
| V\$ESE1_Q3     | ESE-1     | ELF3   | 0.0323613  | 61 |
| V\$P53_02      | p53       | TP53   | 0.39835    | 48 |
| V\$ATF3_Q6_01  | ATF-3     | ATF3   | 0.423389   | 47 |
| V\$E2F4_Q6     | E2F-4     | E2F4   | 0.0132877  | 47 |
| V\$RNF96_01    | RNF96     | TRIM28 | 0.366368   | 46 |
| V\$PDEF_02     | PDEF      | SPDEF  | 0.00071877 | 45 |
| V\$CIZ_01      | CIZ       | ZNF384 | 0.103151   | 40 |
| V\$ELK1_01     | Elk-1     | ELK1   | 0.118397   | 36 |
| V\$EGR2_01     | Egr-2     | EGR2   | 0.00873037 | 34 |
| V\$SMAD4_Q6    | SMAD4     | SMAD4  | 0.207056   | 27 |
| V\$GLI3_Q5_01  | GLI3      | GLI3   | 0.173122   | 24 |

---
